# Supplementary material for: The conserved GTPase LepA contributes mainly to translation initiation in Escherichia coli
Source: Oxford University Press journal article supplement (doi:10.1093/nar/gku1098), 2014-11-06
Supplement: gku1098_Supplementary_Data.zip [file gku1098_Supplementary_Data.zip]

Archive with 4 entries (4 files):
- nar-02711-v-2014-File012.xls
- nar-02711-v-2014-File013.xls
- nar-02711-v-2014-File011.xls
- nar-02711-v-2014-File010.pdf
