# Supplementary material for: The conserved GTPase LepA contributes mainly to translation initiation in Escherichia coli
Source: Oxford University Press journal article supplement (doi:10.1093/nar/gku1098), 2014-11-06
Supplement: gku1098_Supplementary_Data.zip [file gku1098_Supplementary_Data.zip › nar-02711-v-2014-File011.xls]

## Sheet: All
Ribosome Footprint Samples
WT = wild-type control strain
M = ΔlepA mutant strain						Log Base 2 of Normalized Coverages
C = ΔlepA(pLEPA) complemented strain						Replicates Separate									Replicates Combined									Fold Change
Name	Name2	Chr	Strand	Start	End	WT_1	WT_2	WT_3	M_1	M_2	M_3	C_1	C_2	C_3	WT_(1,2,3)	M_(1,2,3)	C_(1,2,3)	WT/M p-value	WT/M BH q-value	C/M p-value	C/M BH q-value	WT – M	C – M	WT/ M	C / M
Below are those genes significant in both WT/M and C/M comparisons
b0911	rpsA	chr	+	961217,	962891,	-7.34018	-7.41601	-7.3695	-6.09253	-6.0831	-6.18824	-6.55512	-6.52077	-6.53362	-7.37345	-6.10141	-6.53727	2.32173e-05	0.000742825	0.00376314	0.00988162	-1.27203	-0.435862	0.414075	0.739252
b0877	ybjX	chr	-	917350,	918343,	-11.3692	-11.3333	-11.2912	-10.2618	-10.2353	-10.2096	-11.0973	-11.0476	-11.0746	-11.3346	-10.2402	-11.0744	8.64305e-06	0.000676843	2.34149e-06	0.000183138	-1.09431	-0.834191	0.468361	0.560898
b2066	udk	chr	-	2140330,	2140972,	-12.9963	-13.1146	-13.0033	-11.9336	-11.916	-12.0988	-12.8433	-12.7592	-12.6908	-13.0366	-11.9477	-12.7629	0.000276898	0.00239577	0.000622833	0.00343505	-1.08895	-0.815166	0.470105	0.568343
b1718	infC	chr	-	1798119,	1798662,	-10.8776	-10.9659	-10.9016	-9.9073	-9.84304	-9.9365	-10.7224	-10.7348	-10.7318	-10.9133	-9.87789	-10.7294	1.19006e-05	0.000676843	0.000910796	0.00435512	-1.03545	-0.851479	0.487864	0.554216
b2476	purC	chr	-	2594926,	2595640,	-12.1035	-12.0931	-12.0589	-11.1243	-11.0934	-11.2195	-11.7031	-11.6748	-11.6396	-12.0871	-11.1218	-11.672	0.000548581	0.00353351	0.00132609	0.00526113	-0.965295	-0.550127	0.512174	0.68296
b1131	purB	chr	-	1189838,	1191209,	-10.4303	-10.5139	-10.4231	-9.5612	-9.52633	-9.64516	-10.3461	-10.3192	-10.3206	-10.4555	-9.55506	-10.329	5.62561e-05	0.00108071	0.00131078	0.00525752	-0.90039	-0.773985	0.535742	0.5848
b1528	ydeA	chr	+	1615051,	1616242,	-15.9503	-16.1199	-16.1142	-15.2118	-15.0381	-15.5009	-16.243	-16.24	-16.2463	-16.0514	-15.1562	-16.2433	0.0156994	0.0277719	0.0179745	0.0310681	-0.895117	-1.08704	0.537704	0.470726
b0912	ihfB	chr	+	963050,	963335,	-11.7332	-11.8207	-11.824	-10.9531	-10.9748	-10.7214	-11.4144	-11.4929	-11.4842	-11.7877	-10.9271	-11.4619	0.00373747	0.0107982	0.0129697	0.0245281	-0.860509	-0.53478	0.550758	0.690264
b4155	poxA	chr	+	4380665,	4381643,	-14.4236	-14.3694	-14.3281	-13.4927	-13.4967	-13.6862	-14.2101	-14.2465	-14.23	-14.3777	-13.5219	-14.2279	0.00207548	0.00750049	0.00765429	0.016402	-0.855732	-0.705917	0.552585	0.613053
b3499	yhiR	chr	+	3643407,	3644250,	-13.7222	-13.7694	-13.7728	-12.8675	-12.988	-12.8285	-13.6107	-13.6904	-13.7789	-13.7522	-12.9225	-13.6923	0.00131637	0.00576569	0.000305911	0.00223315	-0.829727	-0.769836	0.562636	0.586484
b1540	ydfH	chr	+	1626375,	1627062,	-15.2292	-15.5069	-15.1591	-14.4673	-14.4406	-14.5804	-15.0955	-14.966	-15.1308	-15.2941	-14.4695	-15.0682	0.00901842	0.0184583	0.00110705	0.00481038	-0.824544	-0.598659	0.564661	0.660368
b1126	potA	chr	-	1183680,	1184817,	-12.9769	-13.0295	-12.9563	-12.1851	-12.1634	-12.1209	-12.9662	-12.9312	-13.0499	-12.9882	-12.1642	-12.9848	1.03196e-05	0.000676843	0.000218346	0.00181128	-0.823995	-0.82061	0.564876	0.566203
b2960	trmI	chr	-	3100154,	3100874,	-12.6094	-12.6315	-12.6065	-11.7965	-11.8149	-11.8925	-12.149	-12.1235	-12.1208	-12.6159	-11.8199	-12.1314	0.000733931	0.00413789	0.00591621	0.013539	-0.795931	-0.311461	0.575972	0.805826
b0680	glnS	chr	+	705315,	706980,	-10.7791	-10.7952	-10.7462	-9.99778	-9.97783	-10.0217	-10.0774	-10.0398	-10.0625	-10.7749	-9.99093	-10.0609	2.68498e-06	0.000326094	0.0230395	0.0377668	-0.783961	-0.0699887	0.58077	0.952645
b0477	gsk	chr	+	499348,	500653,	-12.7258	-12.7811	-12.7913	-12.0325	-11.9668	-11.9818	-12.1886	-12.2614	-12.1914	-12.7627	-11.9907	-12.2107	1.10206e-05	0.000676843	0.00235441	0.00738705	-0.771973	-0.220014	0.585616	0.858557
b3287	def	chr	+	3431711,	3432221,	-13.2656	-13.3923	-13.3167	-12.6159	-12.5626	-12.5601	-13.3675	-13.3596	-13.4515	-13.3214	-12.5798	-13.3944	0.000424804	0.00308053	7.9771e-05	0.0011023	-0.74157	-0.814585	0.598088	0.568572
b0835	yliG	chr	-	875932,	877258,	-12.1966	-12.2198	-12.2763	-11.4548	-11.5203	-11.522	-12.0486	-12.0657	-12.0007	-12.2268	-11.4984	-12.0364	2.36319e-05	0.000742825	5.8983e-05	0.000897033	-0.728445	-0.537988	0.603554	0.688731
b1714	pheS	chr	-	1795982,	1796966,	-10.5246	-10.5839	-10.5424	-9.79404	-9.80261	-9.95128	-10.4062	-10.4219	-10.3767	-10.5492	-9.82083	-10.4002	0.00247735	0.00839844	0.00574575	0.0133015	-0.728371	-0.579399	0.603585	0.669243
b4111	proP	chr	+	4328524,	4330027,	-13.1317	-13.0895	-13.1204	-12.3858	-12.4486	-12.3367	-13.3317	-13.2498	-13.2409	-13.1143	-12.4104	-13.2747	0.000588228	0.00372318	3.79274e-05	0.000775286	-0.703863	-0.864228	0.613926	0.54934
b3648	gmk	chr	+	3819450,	3820074,	-12.6363	-12.649	-12.5843	-11.8722	-11.9497	-11.942	-12.5894	-12.414	-12.4721	-12.6253	-11.9222	-12.4942	3.50107e-05	0.000857533	0.00258759	0.00789252	-0.703172	-0.57198	0.61422	0.672693
b3725	pstB	chr	-	3905615,	3906389,	-13.5168	-13.5435	-13.5244	-12.9068	-12.8001	-12.7614	-13.7655	-13.6119	-13.5833	-13.5278	-12.8289	-13.6532	0.0029531	0.00930092	0.00044166	0.00287608	-0.698894	-0.824255	0.616044	0.564774
b1652	rnt	chr	+	1726370,	1727018,	-14.8578	-14.7059	-14.6664	-14.0649	-13.9984	-14.2422	-14.9616	-14.8514	-14.8231	-14.75	-14.0545	-14.8786	0.00276589	0.00893406	0.00203221	0.00667769	-0.695534	-0.82406	0.617481	0.56485
b3288	fmt	chr	+	3432235,	3433183,	-12.9878	-13.0445	-12.9875	-12.2582	-12.3339	-12.3599	-12.8795	-12.834	-12.8231	-13.0063	-12.3119	-12.8458	0.000154574	0.00189462	0.000473188	0.00299504	-0.694381	-0.533872	0.617974	0.690698
b1253	yciA	chr	-	1309871,	1310270,	-14.2575	-14.2096	-14.2238	-13.5478	-13.5684	-13.4945	-13.9211	-13.892	-13.9288	-14.2318	-13.5504	-13.9152	4.50347e-05	0.000930434	0.00065009	0.00346311	-0.681403	-0.364813	0.623559	0.776569
b0797	rhlE	chr	+	830094,	831459,	-15.1628	-15.2164	-15.0755	-14.507	-14.4802	-14.3775	-15.4074	-15.5784	-15.4327	-15.1546	-14.4733	-15.465	0.000258842	0.00231486	0.00017813	0.001612	-0.681268	-0.991744	0.623617	0.502869
b3364	tsgA	chr	+	3490589,	3491771,	-14.8609	-14.7912	-14.8341	-14.1123	-14.1847	-14.1384	-16.1993	-15.8514	-15.8644	-14.8297	-14.1532	-15.9687	2.04149e-05	0.000734036	0.00299212	0.00851004	-0.676502	-1.81543	0.62568	0.28412
b0418	pgpA	chr	+	435812,	436331,	-14.8002	-14.8569	-14.9173	-14.1166	-14.138	-14.4881	-15.2101	-15.0326	-14.9778	-14.8518	-14.1775	-15.0716	0.0292934	0.0451143	0.00786506	0.016788	-0.674352	-0.894154	0.626614	0.538063
b0417	thiL	chr	+	434857,	435835,	-14.1976	-14.413	-14.2424	-13.5419	-13.5998	-13.7769	-14.4012	-14.2598	-14.3077	-14.279	-13.6048	-14.3251	0.00265373	0.00883231	0.00271771	0.00812615	-0.674235	-0.720264	0.626664	0.606987
b3230	rpsI	chr	-	3375836,	3376229,	-8.77255	-8.81045	-8.79641	-8.13088	-8.09055	-8.22746	-8.51489	-8.45088	-8.4593	-8.7919	-8.1236	-8.47596	0.00233187	0.00808038	0.006068	0.0137852	-0.668295	-0.352351	0.62925	0.783307
b3740	gidB	chr	-	3921079,	3921703,	-14.2272	-14.2743	-14.2291	-13.5478	-13.5919	-13.6078	-14.3585	-14.2664	-14.3718	-14.2432	-13.5793	-14.3354	1.19359e-05	0.000676843	0.000234851	0.00191912	-0.663901	-0.756024	0.631169	0.592126
b1237	hns	chr	-	1291731,	1292145,	-9.09679	-9.12676	-9.11791	-8.46621	-8.4771	-8.34412	-8.69162	-8.72356	-8.71186	-9.11275	-8.45297	-8.70818	0.00280094	0.0089547	0.0185972	0.0319185	-0.659778	-0.255207	0.632976	0.837867
b1232	purU	chr	-	1287004,	1287847,	-13.1168	-13.1413	-13.0506	-12.4125	-12.4893	-12.3746	-13.0246	-13.0527	-13.2139	-13.1055	-12.4459	-13.0977	0.000131707	0.00171084	0.00170842	0.0061465	-0.659648	-0.651818	0.633033	0.636478
b0170	tsf	chr	+	190856,	191708,	-7.8449	-7.87196	-7.84756	-7.20864	-7.18825	-7.2045	-7.65528	-7.66605	-7.6517	-7.85461	-7.19744	-7.65717	1.24791e-06	0.000323462	1.72456e-06	0.000171672	-0.657172	-0.459731	0.63412	0.727122
b1047	mdoC	chr	-	1107006,	1108164,	-15.7478	-15.8289	-15.8545	-15.1748	-15.2269	-14.8653	-15.9255	-15.6994	-15.676	-15.8046	-15.1502	-15.7656	0.0175112	0.0300544	0.0104551	0.0208152	-0.654334	-0.615402	0.635369	0.652748
b3099	yqjE	chr	+	3247704,	3248109,	-16.1401	-15.9979	-16.1241	-15.4562	-15.4371	-15.3775	-15.9078	-15.8716	-15.8313	-16.0868	-15.4344	-15.8696	0.000920079	0.00466429	0.000165412	0.00154809	-0.652366	-0.435137	0.636236	0.739624
b3965	trmA	chr	-	4160192,	4161293,	-13.2292	-13.2921	-13.2805	-12.5331	-12.6552	-12.6572	-13.2183	-13.1602	-13.2219	-13.2645	-12.6136	-13.2022	0.000961787	0.00476628	0.00121605	0.00506301	-0.650971	-0.588625	0.636852	0.664976
b3570	bax	chr	-	3734375,	3735200,	-13.2402	-13.2267	-13.3395	-12.619	-12.6801	-12.4226	-12.91	-12.892	-13.0076	-13.2634	-12.6187	-12.9385	0.00496892	0.0128023	0.0272492	0.0428705	-0.644623	-0.319784	0.63966	0.80119
b0415	ribE	chr	+	433870,	434341,	-11.5993	-11.5726	-11.5561	-10.8988	-10.9745	-10.9474	-11.7214	-11.8107	-11.772	-11.5779	-10.9448	-11.7653	9.49946e-05	0.00138692	2.06188e-05	0.000550672	-0.63317	-0.82053	0.644758	0.566234
b3289	rsmB	chr	+	3433228,	3434518,	-13.022	-13.0097	-13.0413	-12.4058	-12.3901	-12.3924	-13.2682	-13.2498	-13.2683	-13.0234	-12.3957	-13.2628	8.71467e-06	0.000676843	8.2068e-08	2.24661e-05	-0.627694	-0.867128	0.64721	0.548237
b0636	ybeA	chr	-	667470,	667938,	-14.5501	-14.5406	-14.459	-13.9049	-13.9296	-13.7847	-14.3889	-14.2664	-14.3778	-14.5203	-13.899	-14.3478	0.000632822	0.00387117	0.00147416	0.00549049	-0.621334	-0.448821	0.650069	0.732641
b1876	argS	chr	+	1958085,	1959819,	-10.814	-10.8076	-10.7367	-10.1589	-10.1757	-10.1758	-10.7866	-10.7913	-10.7337	-10.7893	-10.1701	-10.7689	0.00101633	0.00492607	0.000380176	0.00263476	-0.619284	-0.598894	0.650994	0.66026
b0154	hemL	chr	-	173601,	174882,	-10.6989	-10.7175	-10.7135	-10.062	-10.1108	-10.1055	-10.4873	-10.524	-10.4785	-10.7093	-10.0935	-10.4949	0.00015349	0.00189462	4.48993e-05	0.000775286	-0.615723	-0.401345	0.652603	0.757152
b1209	lolB	chr	-	1262099,	1262723,	-14.0281	-13.9294	-13.9194	-13.4479	-13.3184	-13.2476	-14.0127	-13.7359	-13.907	-13.9633	-13.3493	-13.8891	0.0020231	0.00749091	0.00696156	0.0152764	-0.613945	-0.539822	0.653407	0.687856
b2794	queF	chr	+	2923369,	2924218,	-13.9735	-14.0781	-14.0354	-13.4018	-13.4283	-13.3775	-13.9939	-13.9128	-13.8478	-14.0254	-13.4118	-13.9167	0.000430445	0.0031009	0.00327419	0.00898555	-0.613585	-0.504942	0.653571	0.704689
b0113	pdhR	chr	+	122091,	122856,	-14.3414	-14.5069	-14.3832	-13.7405	-13.8218	-13.8407	-14.0657	-14.2204	-14.2573	-14.4066	-13.7969	-14.177	0.0011683	0.00528631	0.0103145	0.0206479	-0.609787	-0.380107	0.655294	0.768381
b0884	infA	chr	-	925447,	925666,	-11.9548	-11.9439	-11.9119	-11.3174	-11.3196	-11.3909	-12.395	-12.414	-12.3091	-11.9388	-11.3292	-12.3693	0.000191242	0.00201356	2.64955e-05	0.000630707	-0.609554	-1.04011	0.655399	0.486289
b0120	speD	chr	-	134787,	135582,	-12.857	-12.9557	-12.9454	-12.2606	-12.3538	-12.2831	-13.0342	-13.2204	-12.9846	-12.9144	-12.3115	-13.0682	0.000132805	0.00171084	0.00370808	0.00982106	-0.602894	-0.756684	0.658432	0.591855
b0474	adk	chr	+	496398,	497043,	-10.3979	-10.3938	-10.3745	-9.78009	-9.78521	-9.82749	-10.1595	-10.1197	-10.1489	-10.3898	-9.78969	-10.1439	6.85159e-05	0.00119087	8.05334e-05	0.0011023	-0.600111	-0.354209	0.659703	0.782298
b4005	purD	chr	-	4202664,	4203954,	-12.8478	-12.8622	-12.8271	-12.2486	-12.2531	-12.2261	-12.4136	-12.564	-12.4995	-12.8466	-12.2475	-12.4872	2.0678e-06	0.000323462	0.0255948	0.0409143	-0.599023	-0.239701	0.660201	0.846921
b1524	yneH	chr	-	1610348,	1611275,	-14.8985	-14.8927	-14.6379	-14.2498	-14.1818	-14.2971	-14.7031	-14.7359	-14.6541	-14.8171	-14.2209	-14.695	0.0130562	0.0245927	0.000646258	0.00346311	-0.596175	-0.474058	0.661505	0.719937
b0930	asnS	chr	-	986807,	988208,	-9.74046	-9.74682	-9.75344	-9.15074	-9.13619	-9.2063	-9.55092	-9.54155	-9.49832	-9.74629	-9.15127	-9.52926	0.00100249	0.00490058	0.000255632	0.00202838	-0.595022	-0.377996	0.662035	0.769506
b0027	lspA	chr	+	25206,	25701,	-14.2842	-14.4525	-14.2668	-13.6842	-13.7542	-13.8084	-14.2265	-14.1696	-14.2032	-14.3328	-13.7382	-14.2012	0.00240519	0.00825606	0.00196271	0.00654481	-0.594617	-0.463045	0.66222	0.725454
b0051	ksgA	chr	-	51608,	52430,	-12.9339	-12.8604	-12.9237	-12.3049	-12.3331	-12.2666	-12.7655	-12.9579	-12.8029	-12.9062	-12.3136	-12.8333	4.49988e-05	0.000930434	0.00691484	0.0152149	-0.592558	-0.519734	0.663166	0.6975
b1749	xthA	chr	+	1830451,	1831258,	-12.1777	-12.0668	-12.134	-11.5427	-11.5573	-11.4817	-11.8784	-11.9783	-11.893	-12.1275	-11.541	-11.9125	0.000209326	0.00208374	0.00082124	0.00403255	-0.586542	-0.371483	0.665937	0.772988
b1704	aroH	chr	+	1786458,	1787505,	-14.4962	-14.5722	-14.5928	-13.9472	-13.988	-13.9074	-14.3112	-14.1571	-14.1822	-14.5485	-13.9621	-14.2183	0.000120244	0.0016057	0.0160591	0.0283625	-0.58645	-0.2562	0.66598	0.837291
b1835	rsmF	chr	+	1918246,	1919686,	-14.3544	-14.3494	-14.2971	-13.8204	-13.7697	-13.5736	-14.2486	-14.214	-14.1208	-14.3361	-13.7552	-14.1919	0.0112079	0.0219939	0.01156	0.0223248	-0.580886	-0.436652	0.668553	0.738847
b2499	purM	chr	+	2619218,	2620256,	-12.0421	-12.076	-12.0372	-11.4085	-11.4911	-11.5501	-11.7272	-11.801	-11.7642	-12.0519	-11.4714	-11.7618	0.0029005	0.00920592	0.00894189	0.0184395	-0.580454	-0.290399	0.668753	0.817676
b1435	ydcP	chr	+	1504804,	1506766,	-13.278	-13.2802	-13.1937	-12.5898	-12.6906	-12.8245	-13.3199	-13.4783	-13.5159	-13.254	-12.6748	-13.4337	0.00727684	0.0160325	0.00133282	0.00526874	-0.579235	-0.758912	0.669319	0.590942
b2677	proV	chr	+	2802836,	2804039,	-12.019	-12.0255	-12.0176	-11.4583	-11.4825	-11.3512	-11.808	-11.8352	-11.8436	-12.0207	-11.4542	-11.8286	0.00452196	0.0121959	0.00691966	0.0152149	-0.566551	-0.374427	0.675229	0.771412
b2171	yeiP	chr	+	2263471,	2264044,	-11.5617	-11.556	-11.5017	-10.9757	-10.9987	-10.9021	-11.3406	-11.3911	-11.3013	-11.5424	-10.9763	-11.3411	0.000202098	0.00204905	0.000630215	0.00345043	-0.566069	-0.364741	0.675455	0.776608
b1637	tyrS	chr	-	1713971,	1715246,	-11.0085	-11.0312	-10.9591	-10.4434	-10.4594	-10.365	-10.8003	-10.7997	-10.8236	-11.0016	-10.4397	-10.8084	0.000161146	0.00193907	0.00355638	0.00952136	-0.561916	-0.36871	0.677402	0.774475
b2508	guaB	chr	-	2630625,	2632092,	-7.92512	-7.91849	-7.87562	-7.3322	-7.34746	-7.4163	-8.20064	-8.20255	-8.18963	-7.90858	-7.35232	-8.19728	0.00022101	0.00214605	0.000753859	0.00385736	-0.556255	-0.844953	0.680065	0.556729
b4146	yjeK	chr	-	4372651,	4373680,	-14.9536	-14.8927	-14.9432	-14.3648	-14.4406	-14.1893	-14.8475	-15.0441	-14.775	-14.9301	-14.3754	-14.8756	0.0112875	0.0221105	0.00715538	0.0155388	-0.554721	-0.500175	0.680789	0.707021
b3737	atpE	chr	-	3918972,	3919212,	-8.15491	-8.15695	-8.13298	-7.58442	-7.56369	-7.737	-8.01538	-7.97865	-7.95294	-8.14927	-7.59515	-7.9821	0.00976758	0.019697	0.0154779	0.0275523	-0.554117	-0.38695	0.681074	0.764745
b0881	clpS	chr	+	922135,	922456,	-16.0597	-16.1115	-16.066	-15.6082	-15.5096	-15.4256	-16.1361	-16.1884	-16.4327	-16.0785	-15.5287	-16.2511	0.00508772	0.0128365	0.00485337	0.011876	-0.549786	-0.722317	0.683121	0.606123
b1088	yceD	chr	+	1146016,	1146538,	-12.0853	-12.1252	-12.0965	-11.5449	-11.534	-11.6412	-12.045	-12.2172	-11.9949	-12.1017	-11.5531	-12.0751	0.0017913	0.00697929	0.0068029	0.0151099	-0.548612	-0.522009	0.683678	0.696401
b0126	can	chr	-	142007,	142670,	-11.9507	-11.8155	-11.8945	-11.3358	-11.3249	-11.4059	-11.5956	-11.489	-11.5535	-11.8885	-11.3403	-11.5485	0.000769185	0.00419033	0.00982816	0.0199959	-0.548172	-0.208215	0.683886	0.865608
b2946	rsmE	chr	+	3089155,	3089887,	-14.6323	-14.6776	-14.6593	-14.0649	-14.1582	-14.0415	-14.484	-14.356	-14.439	-14.6549	-14.1088	-14.4293	0.00154415	0.0062264	0.00285914	0.00834868	-0.546106	-0.320455	0.684866	0.800817
b0124	gcd	chr	-	138834,	141225,	-15.5652	-15.5293	-15.3832	-14.8936	-14.97	-15.0795	-15.458	-15.4515	-15.6325	-15.4991	-14.9595	-15.5157	0.00274091	0.00890432	0.0027384	0.00812615	-0.539601	-0.556193	0.687961	0.680094
b3067	rpoD	chr	+	3211068,	3212910,	-10.0083	-10.0143	-9.96918	-9.43948	-9.46039	-9.51021	-10.2827	-10.2482	-10.284	-9.999	-9.46062	-10.2729	8.36794e-05	0.0012904	4.12361e-05	0.000775286	-0.538376	-0.812296	0.688546	0.569475
b0955	ycbZ	chr	-	1015761,	1017522,	-13.3819	-13.4313	-13.4085	-12.8955	-12.8771	-12.7886	-13.3112	-13.4939	-13.2463	-13.4058	-12.8697	-13.3385	0.000995254	0.00488701	0.0110794	0.0216475	-0.536099	-0.46878	0.689633	0.722576
b0405	queA	chr	+	424234,	425305,	-13.3295	-13.3644	-13.2438	-12.7851	-12.7966	-12.7158	-13.2514	-13.3667	-13.1744	-13.3157	-12.7805	-13.2559	0.000437027	0.00312774	0.00510554	0.0121799	-0.535226	-0.475429	0.69005	0.719253
b1722	ydiY	chr	-	1803348,	1804107,	-14.3964	-14.4822	-14.4252	-13.8383	-13.9001	-14.0322	-14.5105	-14.5056	-14.6254	-14.4327	-13.8977	-14.5488	0.00523376	0.0129954	0.00146318	0.00548692	-0.534967	-0.651089	0.690175	0.6368
b3187	ispB	chr	+	3331731,	3332703,	-12.8686	-12.9073	-12.8443	-12.339	-12.3273	-12.4348	-12.8142	-12.8741	-12.7593	-12.8743	-12.3467	-12.8116	0.000855615	0.00445492	0.000703476	0.00368568	-0.527537	-0.464879	0.693738	0.724532
b0762	ybhT	chr	+	793995,	794145,	-14.0421	-14.0295	-13.9541	-13.4479	-13.5492	-13.3599	-14.0511	-14.0788	-14.2683	-14.0122	-13.4855	-14.1332	0.00301663	0.00941057	0.00177851	0.00624189	-0.526664	-0.647655	0.694158	0.638317
b1035	ycdY	chr	+	1098862,	1099417,	-12.7629	-12.7521	-12.7854	-12.2789	-12.1862	-12.3425	-12.7399	-12.5416	-12.6982	-12.7657	-12.2392	-12.6642	0.00624482	0.0144568	0.00811159	0.0171471	-0.526533	-0.425002	0.694221	0.744838
b4108	yjdM	chr	-	4324421,	4324757,	-12.3468	-12.3519	-12.2901	-11.815	-11.8264	-11.7384	-12.4548	-12.4939	-12.5543	-12.332	-11.8092	-12.5011	0.000179817	0.00198336	6.0964e-05	0.00091446	-0.522762	-0.691857	0.696038	0.619056
b4371	rsmC	chr	-	4604691,	4605723,	-13.0966	-13.1381	-13.0193	-12.6206	-12.5368	-12.5567	-12.9893	-13.0157	-13.1009	-13.0875	-12.5673	-13.0359	0.000469079	0.00322938	0.000573059	0.00326328	-0.520201	-0.468657	0.697275	0.722637
b2685	emrA	chr	+	2809448,	2810621,	-13.1021	-13.1083	-13.1377	-12.5027	-12.6532	-12.6148	-13.0151	-12.9715	-13.0619	-13.1143	-12.5956	-13.0184	0.00510176	0.0128424	0.00300069	0.00851233	-0.518703	-0.422821	0.697999	0.745965
b3806	cyaA	chr	+	3989175,	3991722,	-14.0246	-14.0176	-14.0331	-13.6809	-13.4108	-13.4817	-14.1207	-13.9606	-13.9778	-14.0247	-13.5065	-14.0209	0.0248033	0.0395336	0.0104053	0.0207538	-0.518196	-0.514395	0.698244	0.700086
b2153	folE	chr	-	2241005,	2241674,	-12.6178	-12.7051	-12.6117	-12.1623	-12.1095	-12.1334	-12.6397	-12.771	-12.592	-12.6445	-12.1305	-12.6596	0.000681086	0.00403129	0.00646726	0.0145414	-0.514008	-0.529117	0.700274	0.692979
b0089	ftsW	chr	+	98402,	99647,	-14.1976	-14.3669	-14.2264	-13.6552	-13.8427	-13.6644	-14.0905	-14.4744	-14.2795	-14.2602	-13.7507	-14.2628	0.00272345	0.00887554	0.019794	0.0333967	-0.509597	-0.512157	0.702419	0.701173
b0931	pncB	chr	-	988376,	989579,	-13.0351	-13.0812	-13.1118	-12.5792	-12.5521	-12.5702	-13.0222	-12.9879	-13.074	-13.072	-12.5638	-13.0301	0.000661784	0.00393833	0.00135265	0.00527599	-0.50826	-0.466291	0.70307	0.723823
b1608	rstA	chr	+	1680182,	1680902,	-14.3157	-14.3469	-14.4466	-13.8936	-13.8357	-13.8488	-14.1413	-14.24	-14.2192	-14.3626	-13.8568	-14.1975	0.00192111	0.00735532	0.00167162	0.00608116	-0.505784	-0.340703	0.704277	0.789657
b1767	ansA	chr	+	1848883,	1849900,	-12.9001	-12.8649	-12.8992	-12.4152	-12.3884	-12.2915	-12.8752	-12.8818	-12.9778	-12.888	-12.3824	-12.9129	0.00274855	0.00890432	0.000435601	0.00287339	-0.505624	-0.530443	0.704356	0.692342
b3807	cyaY	chr	-	3991761,	3992082,	-14.3157	-14.4472	-14.4653	-13.8026	-13.9321	-13.9863	-14.4906	-14.5135	-14.4898	-14.4006	-13.8952	-14.497	0.00240185	0.00825606	0.00744604	0.01605	-0.505411	-0.601822	0.704459	0.658921
b1676	pykF	chr	+	1753721,	1755134,	-8.43234	-8.42397	-8.41936	-7.89731	-7.92551	-7.95927	-8.40847	-8.4406	-8.446	-8.42583	-7.92096	-8.43119	0.000842305	0.00443425	6.23771e-05	0.000923013	-0.504875	-0.510239	0.704722	0.702106
b3475	acpT	chr	+	3610991,	3611579,	-15.7364	-15.8711	-15.7066	-15.3596	-15.2515	-15.1384	-15.5649	-15.7545	-15.7057	-15.7709	-15.269	-15.6687	0.00364007	0.010629	0.00790656	0.0168264	-0.501973	-0.399738	0.70614	0.757996
b3166	truB	chr	-	3309854,	3310799,	-13.6022	-13.7811	-13.6031	-13.1544	-13.1351	-13.2694	-13.5443	-13.4401	-13.5292	-13.6596	-13.1608	-13.5075	0.00407582	0.0112988	0.00469341	0.011575	-0.498787	-0.346714	0.707702	0.786373
b1831	proQ	chr	-	1912859,	1913558,	-11.2438	-11.2221	-11.2047	-10.6838	-10.7274	-10.8275	-11.0109	-11.0129	-11.0134	-11.2253	-10.727	-11.0124	0.00520927	0.0129954	0.0245729	0.0395696	-0.498316	-0.285428	0.707933	0.820498
b0444	queC	chr	-	464075,	464771,	-13.1039	-13.1167	-13.1365	-12.6425	-12.5889	-12.6789	-13.2598	-13.2012	-13.2573	-13.1175	-12.6198	-13.2413	0.00110255	0.00515939	9.21252e-05	0.00112767	-0.497674	-0.621571	0.708248	0.649963
b1109	ndh	chr	+	1165307,	1166612,	-11.0261	-11.064	-10.9987	-10.5346	-10.5036	-10.6617	-11.8969	-11.8514	-11.9756	-11.0307	-10.5364	-11.9105	0.00513055	0.0128852	4.43885e-05	0.000775286	-0.494209	-1.3741	0.709951	0.385794
b0015	dnaJ	chr	+	14167,	15298,	-12.1922	-12.1978	-12.161	-11.6728	-11.7204	-11.6394	-11.9333	-11.8972	-11.9665	-12.1851	-11.6922	-11.9342	0.000370998	0.00280168	0.00131051	0.00525752	-0.492885	-0.242046	0.710602	0.845545
b2890	lysS	chr	-	3031678,	3033196,	-9.82014	-9.90086	-9.81604	-9.33551	-9.33053	-9.47578	-9.8966	-9.84828	-9.85712	-9.8453	-9.35288	-9.86815	0.00268459	0.00887554	0.00560748	0.0131201	-0.492419	-0.515277	0.710832	0.699659
b3783	rho	chr	+	3964439,	3965699,	-9.88941	-9.93954	-9.89104	-9.43503	-9.40357	-9.47065	-9.86744	-9.81707	-9.81143	-9.90636	-9.42384	-9.83244	6.07504e-05	0.00113878	0.000119554	0.00126999	-0.482519	-0.408593	0.715727	0.753358
b2559	tadA	chr	-	2695375,	2695879,	-15.9177	-16.1199	-16.0565	-15.5597	-15.5938	-15.331	-16.484	-16.6638	-16.2683	-16.0221	-15.5405	-16.4515	0.00803125	0.0169773	0.00320121	0.00888462	-0.481563	-0.911037	0.716201	0.531803
b3249	mreD	chr	-	3396408,	3396897,	-15.463	-15.552	-15.4435	-15.0949	-14.9598	-14.9863	-15.4074	-15.7176	-15.6042	-15.4863	-15.0076	-15.5633	0.00107336	0.00506606	0.013211	0.0248392	-0.478715	-0.555717	0.717617	0.680319
b4064	yjcD	chr	+	4276501,	4277851,	-11.8772	-11.8868	-11.8529	-11.4058	-11.3643	-11.5171	-12.0306	-12.0059	-11.9915	-11.8734	-11.3999	-12.0093	0.00802863	0.0169773	0.00412281	0.0105478	-0.473476	-0.609397	0.720227	0.655471
b0287	yagU	chr	+	302214,	302829,	-14.0473	-14.0658	-14.1718	-13.7371	-13.5359	-13.6359	-14.317	-14.3631	-14.1822	-14.0882	-13.6151	-14.2806	0.00443795	0.0121186	0.00123459	0.00512076	-0.473052	-0.665495	0.720439	0.630472
b2951	yggS	chr	+	3093119,	3093824,	-13.6725	-13.6045	-13.5557	-13.1144	-13.1892	-13.0509	-13.6107	-13.655	-13.5903	-13.6156	-13.1428	-13.6163	0.000807839	0.0042941	0.00182136	0.00627378	-0.472859	-0.473526	0.720535	0.720202
b1627	rsxA	chr	+	1703790,	1704372,	-14.8272	-14.8428	-14.744	-14.3036	-14.3681	-14.2971	-14.9708	-15.1634	-15.1512	-14.808	-14.3356	-15.089	0.000363182	0.00276541	0.00294624	0.00847881	-0.472361	-0.753344	0.720784	0.593227
b1822	rrmA	chr	-	1904274,	1905084,	-14.2493	-14.1284	-14.1924	-13.6777	-13.7388	-13.7769	-14.7108	-14.5215	-14.5833	-14.1919	-13.7236	-14.6075	0.00063651	0.00387211	0.000797864	0.00395322	-0.468276	-0.883898	0.722828	0.541901
b1832	yebR	chr	-	1913654,	1914206,	-13.2957	-13.195	-13.2424	-12.7695	-12.8311	-12.6253	-13.2486	-13.4326	-13.1953	-13.2463	-12.7782	-13.2806	0.0058878	0.0139852	0.00465858	0.011515	-0.468119	-0.50241	0.722907	0.705927
b3572	avtA	chr	+	3737727,	3738981,	-13.9735	-14.0335	-13.8834	-13.4673	-13.4856	-13.6218	-13.9754	-13.7829	-13.8602	-13.9664	-13.4988	-13.8756	0.0026838	0.00887554	0.00979422	0.0199902	-0.467595	-0.376715	0.723169	0.77019
b4044	dinF	chr	+	4255764,	4257144,	-15.4031	-15.4525	-15.3027	-14.8639	-14.9396	-15.0229	-15.5511	-15.6994	-15.5093	-15.3895	-14.9257	-15.5779	0.00223551	0.00792195	0.0011729	0.0049397	-0.46383	-0.652172	0.725059	0.636321
b2909	ygfB	chr	-	3052887,	3053466,	-12.15	-12.129	-12.1584	-11.6449	-11.6733	-11.8025	-12.1246	-12.0143	-12.1308	-12.1454	-11.6821	-12.0933	0.0101231	0.0203461	0.00408865	0.0105015	-0.463266	-0.411217	0.725343	0.751989
b2183	rsuA	chr	-	2277809,	2278505,	-13.1801	-13.204	-13.2627	-12.7592	-12.7443	-12.7422	-13.0535	-13.1727	-13.1537	-13.2113	-12.7489	-13.1233	0.00188248	0.00723268	0.00837887	0.0175093	-0.462366	-0.374394	0.725795	0.771429
b0807	ybiN	chr	+	841554,	842481,	-14.2015	-14.1586	-14.1616	-13.7038	-13.6959	-13.8164	-14.3465	-14.3002	-14.4578	-14.1757	-13.7158	-14.3709	0.00392977	0.0110336	0.000580903	0.00327881	-0.459839	-0.655102	0.727068	0.635031
b3363	ppiA	chr	-	3489746,	3490319,	-12.442	-12.4924	-12.4818	-12.0181	-12.0004	-12.0415	-12.351	-12.4307	-12.3249	-12.47	-12.0123	-12.3646	3.29692e-05	0.000857533	0.00385848	0.0100357	-0.457671	-0.35227	0.728161	0.78335
b2500	purN	chr	+	2620255,	2620894,	-14.4397	-14.5463	-14.5162	-14.0777	-14.001	-14.0988	-14.7576	-14.7925	-14.9331	-14.4963	-14.0405	-14.8282	0.000541543	0.0035297	0.0008995	0.00432092	-0.455779	-0.787712	0.729117	0.579262
b0523	purE	chr	-	551813,	552323,	-14.4724	-14.3949	-14.3861	-14.0777	-13.8711	-14.0795	-14.4136	-14.4978	-14.36	-14.4214	-13.9674	-14.4183	0.0169036	0.0293336	0.011779	0.0225489	-0.453983	-0.45094	0.730025	0.731566
b0954	fabA	chr	-	1015174,	1015693,	-8.6713	-8.68255	-8.6534	-8.21949	-8.21495	-8.21337	-8.8962	-8.93006	-8.93687	-8.66987	-8.21623	-8.92053	0.000199369	0.0020432	0.000244275	0.00195241	-0.453637	-0.704303	0.7302	0.613739
b1100	ycfH	chr	+	1155999,	1156797,	-13.6113	-13.6838	-13.6291	-13.141	-13.1685	-13.3716	-13.8433	-13.6376	-13.6541	-13.6402	-13.1875	-13.7123	0.0220153	0.0359803	0.00803941	0.0170274	-0.452747	-0.524871	0.730651	0.695021
b3414	gntY	chr	+	3543645,	3544221,	-11.3088	-11.4482	-11.3572	-10.9221	-10.8922	-10.9875	-11.1647	-11.1152	-11.134	-11.3678	-10.9159	-11.139	0.00154665	0.0062264	0.00767175	0.0164074	-0.451844	-0.223092	0.731108	0.856727
b3982	nusG	chr	+	4175765,	4176311,	-10.7703	-10.7541	-10.7379	-10.2829	-10.2961	-10.3835	-10.7394	-10.7949	-10.7448	-10.7556	-10.3043	-10.7575	0.00296234	0.00930092	0.000958238	0.00450331	-0.451275	-0.453177	0.731396	0.730432
b3390	aroK	chr	-	3516564,	3517086,	-11.7654	-11.6543	-11.6691	-11.2552	-11.277	-11.1471	-12.1516	-12.0031	-12.0216	-11.7	-11.2498	-12.0601	0.000988993	0.00487814	0.00019932	0.00166607	-0.450238	-0.810307	0.731922	0.57026
b3974	coaA	chr	-	4172098,	4173049,	-13.6509	-13.7929	-13.814	-13.3493	-13.2703	-13.2639	-13.6179	-13.4629	-13.573	-13.743	-13.2953	-13.5548	0.00395133	0.0110364	0.0142579	0.0260641	-0.447699	-0.259573	0.733211	0.835335
b1654	grxD	chr	-	1731777,	1732125,	-10.7316	-10.763	-10.7336	-10.2384	-10.378	-10.1579	-10.5916	-10.6339	-10.6183	-10.7425	-10.2961	-10.6135	0.0153312	0.0273861	0.0274309	0.0430327	-0.446463	-0.317374	0.73384	0.802529
b1187	fadR	chr	+	1234160,	1234880,	-13.4759	-13.5321	-13.3612	-13.0232	-12.9919	-13.0747	-13.1859	-13.2367	-13.1359	-13.4601	-13.0144	-13.1825	0.00539859	0.0132302	0.0154997	0.0275523	-0.445765	-0.168164	0.734195	0.889975
b0640	holA	chr	-	669796,	670828,	-15.303	-15.3053	-15.286	-14.9163	-14.8195	-14.8325	-15.3827	-15.24	-15.3838	-15.2989	-14.8531	-15.3395	0.00353234	0.0104256	0.00214655	0.00690092	-0.445756	-0.486388	0.734199	0.71381
b1281	pyrF	chr	+	1339944,	1340682,	-11.9565	-11.9224	-11.9696	-11.5135	-11.5036	-11.5286	-12.2333	-12.1556	-12.2518	-11.9488	-11.5106	-12.2164	0.000106904	0.0015134	0.00104222	0.00462038	-0.438196	-0.705807	0.738057	0.613099
b2748	ftsB	chr	-	2870530,	2870842,	-15.9372	-16.0617	-16.0755	-15.5838	-15.5549	-15.6644	-16.2654	-16.0906	-16.0812	-16.0168	-15.5803	-16.1458	0.002072	0.00750049	0.00364715	0.00971687	-0.436442	-0.565473	0.738955	0.675734
b2527	hscB	chr	-	2656973,	2657489,	-13.8827	-14.0678	-14.0308	-13.5186	-13.5743	-13.5401	-14.484	-14.4515	-14.4203	-13.9843	-13.5504	-14.4515	0.0107155	0.0212115	3.71511e-06	0.000226002	-0.433957	-0.901175	0.740229	0.53545
b2827	thyA	chr	-	2962382,	2963177,	-12.3802	-12.365	-12.3076	-11.9433	-11.9117	-11.9224	-12.4468	-12.4783	-12.4673	-12.354	-11.9238	-12.4633	0.000740889	0.00413915	2.08869e-06	0.000182241	-0.430254	-0.53956	0.742131	0.687981
b1055	yceA	chr	+	1116029,	1117082,	-12.5489	-12.6134	-12.5441	-12.1265	-12.1517	-12.1309	-12.837	-12.9233	-12.8771	-12.5686	-12.1401	-12.8763	0.00105386	0.00506131	0.000446515	0.00287608	-0.428483	-0.736159	0.743043	0.600336
b1125	potB	chr	-	1182839,	1183667,	-13.5352	-13.6854	-13.5474	-13.245	-13.1152	-13.1334	-13.8518	-13.9233	-14.091	-13.587	-13.16	-13.9543	0.00278477	0.00894229	0.00182198	0.00627378	-0.42703	-0.794293	0.743792	0.576626
b3179	rrmJ	chr	-	3325056,	3325686,	-14.2821	-14.2861	-14.1718	-13.7609	-13.8855	-13.7614	-14.1005	-14.2334	-14.177	-14.2509	-13.8241	-14.1659	0.00141657	0.00596551	0.00295016	0.00847881	-0.426832	-0.341783	0.743894	0.789066
b2318	truA	chr	-	2432845,	2433658,	-14.6999	-14.7316	-14.6809	-14.2789	-14.2515	-14.3894	-14.8645	-14.8022	-14.7438	-14.7049	-14.2804	-14.8023	0.00602484	0.0142181	0.000954722	0.00450331	-0.424473	-0.521897	0.745111	0.696455
b3321	rpsJ	chr	-	3450980,	3451292,	-8.36421	-8.37623	-8.3459	-7.96146	-7.94643	-7.86819	-8.15531	-8.17281	-8.16941	-8.36292	-7.9395	-8.16547	0.00229968	0.00804564	0.0119845	0.0228625	-0.423411	-0.22596	0.745659	0.855026
b3151	yraQ	chr	-	3295119,	3296160,	-14.627	-14.6254	-14.526	-14.0992	-14.2299	-14.1585	-16.0175	-16.1884	-15.815	-14.5968	-14.1744	-15.988	0.00110789	0.0051623	0.00141114	0.00536529	-0.422402	-1.8136	0.746181	0.284481
b0082	mraW	chr	+	90093,	91035,	-13.3566	-13.3432	-13.3787	-12.9511	-12.9086	-13.0183	-13.1387	-13.1916	-13.2059	-13.3584	-12.9386	-13.1779	0.00331759	0.00992557	0.00716628	0.0155388	-0.419802	-0.239297	0.747527	0.847158
b0423	thiI	chr	+	440772,	442221,	-12.1154	-12.1226	-12.1377	-11.6441	-11.7503	-11.7065	-12.301	-12.1806	-12.2354	-12.1242	-11.7075	-12.2413	0.00384284	0.0109176	0.000344325	0.00243249	-0.416627	-0.533816	0.749174	0.690725
b2187	yejL	chr	+	2282150,	2282378,	-13.7694	-13.864	-13.816	-13.4342	-13.3697	-13.4195	-14.0805	-14.1821	-14.1359	-13.8137	-13.3983	-14.1296	0.000455826	0.00321709	9.36497e-05	0.00112767	-0.415321	-0.73125	0.749852	0.602382
b2350	yfdG	chr	+	2465876,	2466239,	-15.004	-14.9633	-14.7903	-14.6082	-14.4765	-14.4256	-15.6804	-15.3775	-15.6325	-14.9264	-14.5113	-15.5681	0.00885363	0.018189	0.0017263	0.00615732	-0.415087	-1.05682	0.749974	0.48069
b0421	ispA	chr	-	439425,	440325,	-13.3457	-13.4052	-13.3424	-12.9767	-12.9001	-13.0699	-13.4807	-13.2968	-13.2851	-13.3642	-12.9496	-13.3541	0.00807836	0.0170197	0.0112278	0.0217987	-0.414591	-0.40444	0.750232	0.755529
b0766	ybhA	chr	-	796835,	797654,	-12.8796	-12.9843	-12.8493	-12.5128	-12.4765	-12.5009	-12.9986	-13.0045	-12.942	-12.9047	-12.4922	-12.9799	0.00687694	0.0153832	0.00019522	0.0016571	-0.41248	-0.487757	0.751331	0.713133
b3866	yihI	chr	+	4049369,	4049879,	-13.1849	-13.2555	-13.3083	-12.7973	-12.864	-12.8045	-13.2047	-13.2631	-13.2573	-13.2429	-12.8325	-13.2404	0.0013732	0.00585079	0.000130614	0.00135507	-0.410343	-0.407869	0.752445	0.753736
b0475	hemH	chr	+	497278,	498241,	-14.7709	-14.8463	-14.6415	-14.4125	-14.2957	-14.4014	-14.688	-14.6904	-14.7285	-14.7566	-14.3493	-14.703	0.00914273	0.0185814	0.00684662	0.0151456	-0.407283	-0.353639	0.754042	0.782608
b3780	rhlB	chr	-	3962387,	3963653,	-11.9153	-11.9275	-11.8756	-11.459	-11.5218	-11.5302	-11.8784	-11.8665	-11.8262	-11.9078	-11.5017	-11.8561	0.000252415	0.00228425	0.000391931	0.00268359	-0.406139	-0.354442	0.75464	0.782172
b0565	ompT	chr	-	583902,	584856,	-9.51546	-9.58606	-9.57929	-9.17994	-9.14835	-9.09608	-9.5732	-9.53676	-9.5562	-9.55685	-9.15089	-9.55633	0.000237381	0.00220282	0.000982584	0.00452679	-0.405959	-0.405443	0.754734	0.755004
b3620	rfaF	chr	+	3792951,	3793998,	-13.5071	-13.489	-13.4176	-13.0734	-13.0747	-13.0603	-13.2682	-13.2968	-13.3629	-13.4749	-13.0722	-13.3098	0.00376808	0.0108413	0.0117325	0.0224993	-0.402795	-0.237601	0.756391	0.848155
b2507	guaA	chr	-	2628979,	2630557,	-8.05463	-8.05894	-8.03999	-7.64727	-7.62928	-7.72461	-8.66048	-8.68204	-8.67186	-8.05185	-7.64908	-8.67086	0.0044629	0.0121403	0.000529947	0.00315697	-0.402766	-1.02178	0.756407	0.492508
b0436	tig	chr	+	454356,	455655,	-7.51978	-7.54676	-7.52806	-7.11089	-7.12193	-7.19959	-7.3081	-7.32545	-7.29728	-7.53108	-7.12947	-7.30933	0.00300567	0.00940344	0.0201735	0.0338513	-0.40161	-0.179855	0.757013	0.882792
b2672	ygaM	chr	+	2798155,	2798497,	-15.4819	-15.474	-15.5657	-14.9867	-15.1847	-15.0988	-15.4452	-15.4667	-15.4327	-15.5027	-15.103	-15.4471	0.00761811	0.0163887	0.0220135	0.0364671	-0.399716	-0.344029	0.758007	0.787838
b2955	yggW	chr	+	3095288,	3096425,	-14.3522	-14.3444	-14.407	-14.0523	-13.9547	-13.8571	-14.2375	-14.2934	-14.302	-14.3651	-13.9713	-14.2766	0.0111121	0.0218451	0.0195251	0.0330959	-0.393732	-0.305294	0.761158	0.809277
b0927	ycbL	chr	+	982872,	983520,	-13.0526	-13.0978	-13.1155	-12.6284	-12.7367	-12.6936	-12.9963	-12.8266	-12.9643	-13.0854	-12.6933	-12.933	0.00110242	0.00515939	0.0236852	0.0385445	-0.392147	-0.239781	0.761995	0.846874
b1086	rluC	chr	+	1144162,	1145122,	-13.2554	-13.2555	-13.2054	-12.7938	-12.8831	-12.8571	-13.4199	-13.4822	-13.556	-13.2409	-12.8488	-13.4855	0.000597519	0.00375031	0.000377362	0.00263192	-0.392087	-0.636681	0.762026	0.643191
b1913	uvrC	chr	-	1990897,	1992730,	-14.7194	-14.7252	-14.714	-14.3858	-14.283	-14.3658	-14.9255	-14.8022	-14.8728	-14.7198	-14.3288	-14.8696	0.00653301	0.0150287	0.000428336	0.00284259	-0.390968	-0.540747	0.762618	0.687415
b2620	smpB	chr	+	2752917,	2753400,	-12.9025	-12.9911	-13.0553	-12.5807	-12.5454	-12.7346	-12.9731	-12.8192	-12.8728	-12.9744	-12.5839	-12.8907	0.0091378	0.0185814	0.0242164	0.0391683	-0.3905	-0.306773	0.762865	0.808448
b0918	kdsB	chr	+	970074,	970821,	-12.495	-12.47	-12.4771	-12.1232	-12.0651	-12.1309	-12.8433	-12.9472	-12.9157	-12.4815	-12.094	-12.899	0.00118087	0.00532121	7.56188e-05	0.00107536	-0.387524	-0.805055	0.76444	0.57234
b4161	rsgA	chr	-	4388479,	4389532,	-13.8593	-13.9183	-13.8002	-13.5157	-13.4195	-13.5804	-13.7775	-13.8414	-13.7095	-13.8612	-13.4742	-13.7712	0.0047993	0.0125809	0.0118979	0.0227368	-0.387017	-0.296991	0.764709	0.813948
b1204	pth	chr	-	1257151,	1257736,	-13.2977	-13.3859	-13.3069	-12.9511	-12.9572	-12.8989	-13.7536	-13.6333	-13.6982	-13.3291	-12.9464	-13.6976	0.000646944	0.00390512	0.000275356	0.00212335	-0.382756	-0.751251	0.766971	0.594088
b2806	ygdE	chr	-	2938164,	2939265,	-13.6617	-13.6284	-13.6083	-13.2071	-13.2547	-13.3658	-13.7146	-13.5537	-13.5492	-13.6351	-13.2544	-13.6063	0.0106884	0.0212026	0.0106127	0.0210144	-0.380764	-0.351888	0.768031	0.783558
b0529	folD	chr	-	556097,	556964,	-11.7969	-11.7686	-11.7275	-11.3891	-11.3893	-11.3746	-11.9189	-11.9539	-12.0088	-11.7673	-11.387	-11.9607	0.00176218	0.00691608	0.00152404	0.00563793	-0.380302	-0.573631	0.768277	0.671923
b1870	cmoA	chr	+	1950725,	1951469,	-13.7449	-13.6589	-13.6256	-13.3238	-13.2862	-13.3541	-13.8101	-13.8022	-13.665	-13.6813	-13.3086	-13.7545	0.00270439	0.00887554	0.00508816	0.0121649	-0.372677	-0.445955	0.772348	0.734098
b1658	purR	chr	+	1735867,	1736893,	-12.1233	-12.0475	-12.0851	-11.6736	-11.7097	-11.8325	-12.1271	-12.0906	-12.0321	-12.0868	-11.715	-12.082	0.00894264	0.0183374	0.00698516	0.0152783	-0.371785	-0.367005	0.772826	0.77539
b0637	ybeB	chr	-	667941,	668259,	-13.1869	-13.2802	-13.2106	-12.8731	-12.8207	-12.9289	-13.1387	-13.1634	-13.2086	-13.2242	-12.8537	-13.1705	0.00116757	0.00528631	0.00249099	0.007727	-0.370426	-0.316774	0.773554	0.802863
b0102	yacF	chr	-	111855,	112599,	-13.3274	-13.2802	-13.3539	-12.9728	-12.9687	-12.8366	-13.2938	-13.2565	-13.2935	-13.319	-12.9496	-13.2826	0.00480255	0.0125809	0.0109629	0.0215698	-0.369335	-0.332955	0.774139	0.793909
b4006	purH	chr	-	4203965,	4205555,	-11.2697	-11.2755	-11.2054	-10.8712	-10.8759	-10.9485	-11.2724	-11.2917	-11.3084	-11.2529	-10.8849	-11.2908	0.000501434	0.00335655	0.00129711	0.00525752	-0.367989	-0.405952	0.774862	0.754738
b3228	sspB	chr	-	3374300,	3374798,	-13.1849	-13.1456	-13.1528	-12.7204	-12.8092	-12.9289	-13.3465	-13.4103	-13.5028	-13.1625	-12.7957	-13.4194	0.0260754	0.0412014	0.00184664	0.00628715	-0.366843	-0.62372	0.775477	0.648995
b1827	kdgR	chr	-	1907331,	1908123,	-13.0857	-13.0884	-13.0273	-12.6331	-12.7204	-12.8084	-13.3675	-13.198	-13.1666	-13.0696	-12.7031	-13.2433	0.0118102	0.0228483	0.00331315	0.00906976	-0.366521	-0.54016	0.775651	0.687694
b3180	yhbY	chr	+	3325811,	3326105,	-12.4009	-12.4234	-12.4358	-12.0992	-12.0207	-12.0627	-12.8121	-12.9024	-12.8519	-12.4183	-12.0527	-12.8524	0.00106341	0.00506606	2.49732e-05	0.000619632	-0.365563	-0.799697	0.776166	0.57447
b4049	dusA	chr	+	4259736,	4260729,	-13.5095	-13.5549	-13.4085	-13.0927	-13.1423	-13.1687	-13.4873	-13.3739	-13.4265	-13.4945	-13.1294	-13.4315	0.0053116	0.0131039	0.00283786	0.00832997	-0.365094	-0.302115	0.776418	0.811062
b2042	galF	chr	-	2111457,	2112351,	-11.1345	-11.1306	-11.1651	-10.7934	-10.7575	-10.8084	-10.9823	-10.9845	-11.0274	-11.1419	-10.7769	-10.9988	8.6925e-05	0.00130388	0.00055565	0.00321924	-0.364978	-0.221938	0.776481	0.857413
b1605	ydgI	chr	+	1677580,	1678963,	-15.2212	-15.163	-15.2424	-14.7781	-14.8616	-14.9332	-15.7897	-15.629	-15.5903	-15.2076	-14.8434	-15.6687	0.00590737	0.0139852	0.000667008	0.00351141	-0.364177	-0.825321	0.776912	0.564357
b3794	rffM	chr	+	3977978,	3978719,	-14.9802	-14.9595	-14.8586	-14.6331	-14.5246	-14.6359	-15.2654	-15.214	-14.9244	-14.9375	-14.5763	-15.1207	0.00310048	0.00951301	0.0267028	0.0423148	-0.361231	-0.544355	0.7785	0.685698
b0642	leuS	chr	-	671423,	674006,	-9.06596	-9.06885	-9.0455	-8.70029	-8.68674	-8.76718	-9.00682	-9.03034	-9.01997	-9.06103	-8.70295	-9.0184	0.0029644	0.00930092	0.00428016	0.0107249	-0.358072	-0.315449	0.780207	0.803601
b0185	accA	chr	+	208620,	209580,	-10.4319	-10.4637	-10.4433	-10.0973	-10.0667	-10.1471	-10.36	-10.327	-10.2597	-10.4457	-10.0886	-10.3139	0.0016955	0.00675117	0.00571146	0.0132614	-0.357105	-0.225364	0.780729	0.855379
b2113	mrp	chr	-	2191080,	2192190,	-11.081	-11.1665	-11.0633	-10.7249	-10.7427	-10.8134	-10.9576	-11.027	-10.9178	-11.1037	-10.747	-10.9633	0.00134045	0.00579677	0.00828087	0.0174041	-0.356732	-0.216302	0.780932	0.860769
b3028	mdaB	chr	+	3170551,	3171133,	-12.8977	-12.9266	-12.8782	-12.5552	-12.534	-12.5634	-12.8602	-12.892	-12.8109	-12.9016	-12.5454	-12.8517	0.000109962	0.00152416	0.0026079	0.00793237	-0.356202	-0.306294	0.781219	0.808717
b3697	yidA	chr	-	3874162,	3874975,	-13.3852	-13.4052	-13.2505	-12.9491	-12.9997	-13.094	-13.1595	-13.2172	-13.3336	-13.3518	-12.9961	-13.2365	0.00703957	0.0156412	0.0302043	0.0467804	-0.355693	-0.240457	0.781494	0.846477
b1719	thrS	chr	-	1798665,	1800594,	-9.58256	-9.61698	-9.60859	-9.24376	-9.25515	-9.2185	-9.52708	-9.52648	-9.55642	-9.60138	-9.24585	-9.53726	1.74235e-05	0.000691055	3.71152e-05	0.000775286	-0.355537	-0.291418	0.781579	0.817099
b2413	cysZ	chr	+	2529484,	2530246,	-13.4099	-13.5042	-13.5309	-13.0713	-13.1612	-13.0891	-14.1258	-14.3489	-14.3659	-13.4749	-13.1198	-14.2727	0.0016836	0.00672826	0.00185283	0.00628715	-0.355135	-1.15286	0.781797	0.449734
b2961	mutY	chr	+	3101034,	3102087,	-15.1401	-14.9369	-15.0331	-14.652	-14.6875	-14.7537	-15.1464	-15.0555	-15.1308	-15.0393	-14.6851	-15.1136	0.0145961	0.0264893	0.000551359	0.00321924	-0.354213	-0.428472	0.782296	0.743049
b1207	prs	chr	-	1260150,	1261098,	-9.07873	-9.05903	-9.04367	-8.67273	-8.71185	-8.7879	-9.38446	-9.35245	-9.37725	-9.06206	-8.7096	-9.37239	0.00619546	0.0144007	0.0014265	0.00540489	-0.35246	-0.662788	0.783247	0.631656
b2610	ffh	chr	-	2744455,	2745817,	-11.233	-11.2734	-11.2188	-10.857	-10.9007	-10.9311	-11.2881	-11.2934	-11.2788	-11.2422	-10.8904	-11.2863	0.000321819	0.00264157	0.00221295	0.00704727	-0.351823	-0.395981	0.783593	0.759973
b1286	rnb	chr	-	1345001,	1346936,	-10.9127	-10.9009	-10.8743	-10.5773	-10.5401	-10.5009	-10.9525	-10.9459	-10.9331	-10.8977	-10.5465	-10.9436	0.000745383	0.00414312	0.00177346	0.00624189	-0.351155	-0.397111	0.783956	0.759377
b3727	pstC	chr	-	3907461,	3908421,	-14.5501	-14.552	-14.4221	-14.1123	-14.1936	-14.1687	-14.7897	-14.9769	-14.8069	-14.5129	-14.1623	-14.8488	0.00492381	0.012746	0.00293805	0.00847881	-0.350616	-0.686472	0.784249	0.621372
b3162	deaD	chr	-	3303992,	3305882,	-10.6451	-10.6956	-10.6461	-10.3118	-10.3026	-10.357	-11.4516	-11.4205	-11.3959	-10.662	-10.3136	-11.4224	0.000139311	0.00175792	1.23211e-06	0.000149907	-0.348383	-1.10881	0.785464	0.463677
b1780	yeaD	chr	+	1861873,	1862758,	-11.1152	-11.1202	-11.1349	-10.7363	-10.7859	-10.8204	-11.0004	-11.0355	-11.0327	-11.1225	-10.7741	-11.0221	0.00339702	0.0101355	0.00371317	0.00982106	-0.348332	-0.247993	0.785492	0.842067
b3786	rffE	chr	+	3968155,	3969286,	-13.402	-13.5139	-13.4731	-13.0906	-13.0969	-13.2368	-13.4357	-13.3667	-13.5258	-13.4588	-13.1147	-13.4459	0.00730912	0.0160459	0.010513	0.0208545	-0.34411	-0.331254	0.787794	0.794845
b4258	valS	chr	-	4479004,	4481860,	-9.55365	-9.55714	-9.51259	-9.19303	-9.19739	-9.24826	-9.56299	-9.55016	-9.54987	-9.54292	-9.20336	-9.55453	0.000177692	0.00198336	0.00166917	0.00608116	-0.339556	-0.351166	0.790285	0.78395
b2828	lgt	chr	-	2963183,	2964059,	-12.6992	-12.7292	-12.7056	-12.339	-12.3901	-12.3835	-12.9034	-13.0759	-12.8272	-12.711	-12.3719	-12.9237	0.00024743	0.00226406	0.0133772	0.0250394	-0.339104	-0.551809	0.790532	0.682164
b0156	yadR	chr	+	176609,	176954,	-12.3511	-12.4326	-12.4078	-12.0408	-12.0576	-12.0891	-12.348	-12.3793	-12.2851	-12.394	-12.0566	-12.3343	0.000872436	0.00449642	0.00314439	0.00878343	-0.337394	-0.277719	0.79147	0.824894
b2533	suhB	chr	+	2661463,	2662267,	-10.4928	-10.4985	-10.478	-10.1329	-10.1405	-10.2537	-11.6534	-11.6226	-11.6236	-10.4904	-10.1542	-11.6337	0.0134648	0.0252033	0.000352999	0.00247778	-0.336254	-1.47947	0.792095	0.35862
b0922	mukF	chr	+	973541,	974864,	-13.3062	-13.2439	-13.264	-12.9948	-12.894	-12.964	-13.3585	-13.2832	-13.2246	-13.2731	-12.9373	-13.2876	0.00180484	0.00698341	0.00289714	0.00841478	-0.335839	-0.35029	0.792323	0.784427
b1133	mnmA	chr	-	1191889,	1192996,	-11.9315	-11.9887	-11.9056	-11.6584	-11.5825	-11.5787	-12.1582	-12.0921	-12.0898	-11.9427	-11.6069	-12.114	0.000728608	0.00413789	0.000139769	0.0014041	-0.335825	-0.507146	0.792331	0.703613
b0819	ybiS	chr	-	854046,	854967,	-11.4356	-11.4117	-11.4397	-11.0476	-11.147	-11.0356	-11.9742	-11.8831	-11.9005	-11.4288	-11.0963	-11.9206	0.00709643	0.0156982	6.97849e-05	0.00100545	-0.332436	-0.824254	0.794194	0.564774
b0473	htpG	chr	+	494343,	496218,	-10.8841	-10.8879	-10.8653	-10.5273	-10.5533	-10.5744	-10.6599	-10.6061	-10.6636	-10.8799	-10.5476	-10.6451	0.000230191	0.00218735	0.0194944	0.0330952	-0.332309	-0.0974994	0.794264	0.934652
b3303	rpsE	chr	-	3442747,	3443251,	-8.05582	-8.023	-8.04283	-7.71822	-7.71953	-7.67426	-7.87959	-7.89358	-7.89269	-8.04112	-7.71228	-7.88836	0.00013967	0.00175792	0.00365666	0.00971855	-0.328835	-0.17608	0.796179	0.885105
b2185	rplY	chr	+	2280538,	2280823,	-9.02826	-9.0727	-9.01863	-8.71432	-8.71379	-8.7079	-9.30249	-9.31182	-9.32672	-9.04009	-8.71309	-9.31382	0.00226478	0.00799979	4.27331e-05	0.000775286	-0.326999	-0.600726	0.797193	0.659422
b3741	mnmG	chr	-	3921766,	3923656,	-12.4849	-12.4247	-12.4778	-12.0895	-12.1524	-12.1842	-12.6161	-12.564	-12.5696	-12.4626	-12.1357	-12.584	0.00121966	0.00547348	0.00055382	0.00321924	-0.326906	-0.448314	0.797245	0.732899
b0182	lpxB	chr	+	203347,	204496,	-14.1609	-14.1718	-14.351	-13.8712	-13.905	-13.882	-14.6729	-14.5619	-14.6541	-14.2166	-13.8902	-14.6327	0.0283905	0.0439712	0.00105449	0.00463723	-0.326382	-0.742495	0.797534	0.597705
b1380	ldhA	chr	-	1439877,	1440867,	-12.3604	-12.3613	-12.3481	-12.0253	-12.0247	-12.0891	-12.4058	-12.414	-12.4436	-12.3571	-12.0343	-12.4216	0.00357943	0.010508	0.000521455	0.00315697	-0.322852	-0.387302	0.799488	0.764558
b3871	typA	chr	+	4056429,	4058253,	-9.3954	-9.40883	-9.37551	-9.07051	-9.07903	-9.0503	-9.75858	-9.80186	-9.77525	-9.39411	-9.07189	-9.77717	1.65308e-05	0.000691055	4.89187e-06	0.000232895	-0.322224	-0.705284	0.799836	0.613322
b0915	lpxK	chr	+	967588,	968575,	-14.9802	-14.8927	-14.8101	-14.4786	-14.6338	-14.6936	-15.6507	-15.4667	-15.3838	-14.9007	-14.5885	-15.497	0.024962	0.0397288	0.0010867	0.00475973	-0.312253	-0.90859	0.805383	0.532705
b2781	mazG	chr	-	2907915,	2908707,	-14.6861	-14.7479	-14.7252	-14.4287	-14.3987	-14.3894	-14.9167	-14.8818	-15.0146	-14.7176	-14.4073	-14.9401	0.000319033	0.00264157	0.00312716	0.00875766	-0.310357	-0.532812	0.806442	0.691206
b3229	sspA	chr	-	3374803,	3375442,	-10.9232	-10.9296	-10.9749	-10.6429	-10.6129	-10.6671	-11.0731	-11.0004	-11.0298	-10.94	-10.6309	-11.0359	0.000183767	0.00199233	0.000194782	0.0016571	-0.309103	-0.405079	0.807144	0.755195
b0458	ylaC	chr	-	478004,	478475,	-12.6882	-12.7778	-12.8422	-12.4301	-12.4675	-12.4503	-12.837	-12.713	-12.815	-12.7607	-12.4523	-12.7916	0.0148035	0.0267488	0.00842808	0.0175786	-0.30839	-0.339297	0.807543	0.790427
b3315	rplV	chr	-	3447922,	3448255,	-8.40599	-8.46372	-8.411	-8.11848	-8.10799	-8.15346	-8.42953	-8.38925	-8.37968	-8.42639	-8.11816	-8.39975	0.000317465	0.00264157	0.000198724	0.00166607	-0.308227	-0.28159	0.807634	0.822684
b0905	ycaO	chr	-	954094,	955855,	-11.247	-11.2102	-11.2529	-10.8927	-10.944	-10.9584	-11.5005	-11.4948	-11.485	-11.2363	-10.9288	-11.4933	0.000478291	0.00325297	0.000769151	0.00386931	-0.307585	-0.564538	0.807993	0.676172
b2436	hemF	chr	+	2551246,	2552146,	-15.6009	-15.5635	-15.4435	-15.1566	-15.264	-15.331	-16.1569	-15.9769	-15.7515	-15.5419	-15.2368	-15.9496	0.0149176	0.0268708	0.0147026	0.0265666	-0.305152	-0.712794	0.809357	0.610137
b2290	yfbQ	chr	+	2405582,	2406800,	-13.9453	-14.0435	-13.9987	-13.6777	-13.7151	-13.6572	-14.0756	-14.1634	-14.2032	-13.9927	-13.6938	-14.1458	0.00175509	0.00691302	0.00214905	0.00690092	-0.298879	-0.452015	0.812884	0.731021
b2893	dsbC	chr	-	3036133,	3036844,	-12.3354	-12.3065	-12.3743	-12.0671	-12.0522	-11.9441	-12.5038	-12.4251	-12.5176	-12.3367	-12.0405	-12.485	0.00549546	0.013409	0.000979497	0.00452679	-0.29617	-0.444418	0.814412	0.73488
b2557	purL	chr	-	2689677,	2693565,	-10.8872	-10.8376	-10.8422	-10.5698	-10.5487	-10.5889	-10.9904	-10.9907	-11.0589	-10.8576	-10.5617	-11.0145	0.000221464	0.00214605	0.000438723	0.00287608	-0.295982	-0.452815	0.814517	0.730616
b0907	serC	chr	+	956875,	957964,	-12.109	-12.113	-12.0378	-11.7973	-11.7848	-11.8164	-11.9811	-11.9728	-11.9722	-12.0895	-11.7936	-11.9755	0.00321852	0.00973155	0.00127001	0.00519118	-0.295912	-0.181859	0.814557	0.881567
b3785	wzzE	chr	+	3967053,	3968100,	-13.0456	-13.0048	-13.0193	-12.7187	-12.7531	-12.6717	-12.9255	-13.07	-13.0715	-13.0244	-12.7292	-13.0184	0.00143481	0.00596551	0.0116508	0.0224567	-0.295153	-0.289192	0.814986	0.81836
b0820	ybiT	chr	+	855185,	856778,	-12.3769	-12.3284	-12.367	-12.0502	-12.072	-12.0795	-12.4791	-12.5017	-12.5126	-12.3578	-12.0658	-12.4976	0.00028027	0.00239577	6.00203e-06	0.000273842	-0.291997	-0.431847	0.816771	0.741312
b3295	rpoA	chr	-	3438061,	3439051,	-8.30991	-8.28621	-8.28056	-8.00322	-7.99371	-8.03303	-8.25224	-8.26144	-8.25771	-8.29356	-8.00266	-8.25689	7.54544e-05	0.00123943	0.00149608	0.00555326	-0.290897	-0.254229	0.817394	0.838435
b3938	metJ	chr	-	4126100,	4126418,	-13.1533	-13.2198	-13.0565	-12.8787	-12.8533	-12.8164	-13.2767	-13.2698	-13.0984	-13.1463	-12.8562	-13.2088	0.0155149	0.0276241	0.017441	0.0304592	-0.290099	-0.35263	0.817846	0.783155
b1860	ruvB	chr	-	1942369,	1943380,	-14.1743	-14.1051	-14.149	-13.8456	-13.8474	-13.916	-14.1005	-14.0847	-14.1614	-14.1438	-13.8568	-14.1171	0.000961961	0.00476628	0.00171765	0.0061465	-0.286975	-0.260329	0.819619	0.834897
b1584	speG	chr	+	1654207,	1654768,	-12.7528	-12.8082	-12.6602	-12.4493	-12.4612	-12.4691	-12.7957	-12.8094	-12.7988	-12.7435	-12.4584	-12.8009	0.0213263	0.0350635	3.08937e-06	0.000211429	-0.285142	-0.342521	0.820661	0.788662
b3201	lptB	chr	+	3341965,	3342691,	-13.05	-13.0781	-13.1898	-12.7921	-12.8264	-12.8204	-13.1284	-13.0355	-13.0667	-13.0982	-12.814	-13.0785	0.0160699	0.0282197	0.0050461	0.0121173	-0.284228	-0.26456	0.821181	0.832452
b2942	metK	chr	+	3084727,	3085882,	-10.1443	-10.146	-10.1479	-9.83675	-9.87726	-9.87157	-10.3862	-10.4237	-10.3804	-10.1459	-9.86276	-10.3951	0.00186707	0.00719875	9.03213e-06	0.000380392	-0.283151	-0.532343	0.821794	0.691431
b2567	rnc	chr	-	2701404,	2702085,	-12.2998	-12.2766	-12.2716	-12.0356	-11.9655	-12.0532	-12.6861	-12.5275	-12.5937	-12.284	-12.0015	-12.605	0.00585351	0.0139643	0.00117072	0.0049397	-0.282509	-0.603566	0.82216	0.658125
b4388	serB	chr	+	4622917,	4623886,	-14.2252	-14.3346	-14.2532	-14.0523	-13.9598	-13.9595	-14.3112	-14.1571	-14.23	-14.2688	-13.99	-14.2356	0.00342987	0.0102057	0.0143303	0.0260659	-0.278822	-0.245544	0.824264	0.843498
b3368	cysG	chr	+	3495849,	3497223,	-14.4677	-14.3898	-14.3685	-14.0191	-14.2177	-14.1384	-14.3889	-14.5135	-14.4963	-14.4127	-14.1368	-14.4628	0.0221301	0.0361139	0.0111687	0.0217559	-0.275883	-0.325973	0.825945	0.79776
b0180	fabZ	chr	+	202100,	202556,	-9.87898	-9.85876	-9.85844	-9.60014	-9.60446	-9.52323	-10.3744	-10.4039	-10.3733	-9.86634	-9.59068	-10.3826	0.00560472	0.0135709	0.000277701	0.00212428	-0.275663	-0.791956	0.826071	0.57756
b2808	gcvA	chr	-	2939671,	2940589,	-15.6861	-15.8151	-15.8463	-15.4342	-15.5549	-15.4503	-16.0756	-16.214	-16.1822	-15.7732	-15.4979	-16.1531	0.00948931	0.0192066	0.000292258	0.00217702	-0.27527	-0.655203	0.826295	0.634986
b1967	hchA	chr	+	2033858,	2034710,	-13.4677	-13.4713	-13.4953	-13.2667	-13.1729	-13.1739	-13.5477	-13.5456	-13.5972	-13.4768	-13.2037	-13.5645	0.00868935	0.0179187	0.00181381	0.00627378	-0.273053	-0.360785	0.827567	0.778741
b3314	rpsC	chr	-	3447203,	3447905,	-7.47345	-7.48844	-7.45574	-7.19556	-7.19978	-7.21908	-7.57304	-7.56459	-7.57426	-7.47331	-7.20121	-7.57097	3.89949e-05	0.000857533	5.56144e-05	0.000895555	-0.272095	-0.369763	0.828116	0.77391
b1059	solA	chr	-	1118690,	1119809,	-13.4855	-13.5307	-13.4905	-13.1657	-13.2814	-13.205	-13.5172	-13.5096	-13.461	-13.5018	-13.2304	-13.4947	0.00656101	0.0150358	0.00533444	0.0125348	-0.271417	-0.264328	0.828505	0.832587
b0238	gpt	chr	+	255976,	256435,	-10.68	-10.6603	-10.6243	-10.3805	-10.4032	-10.3418	-11.1207	-11.161	-11.1327	-10.6573	-10.3864	-11.1368	0.000339175	0.00270787	1.4111e-05	0.000482861	-0.270939	-0.75041	0.82878	0.594435
b3967	murI	chr	+	4163450,	4164308,	-13.5107	-13.5111	-13.5049	-13.2716	-13.2562	-13.1135	-13.5789	-13.6726	-13.6077	-13.5092	-13.2392	-13.6163	0.0276924	0.0433188	0.005163	0.0122789	-0.270046	-0.377131	0.829293	0.769967
b0923	mukE	chr	+	974871,	975549,	-13.5984	-13.4525	-13.6539	-13.2498	-13.3135	-13.3253	-13.6544	-13.4822	-13.6218	-13.5633	-13.2936	-13.5902	0.0322091	0.0486469	0.0185704	0.0319185	-0.269744	-0.296553	0.829467	0.814195
b1214	ychA	chr	+	1266542,	1267352,	-14.5377	-14.7381	-14.6557	-14.3493	-14.358	-14.4379	-14.7897	-14.9339	-14.6834	-14.6357	-14.3666	-14.7909	0.0289681	0.0448024	0.0179801	0.0310681	-0.269012	-0.424282	0.829888	0.745209
b3714	yieG	chr	-	3893294,	3894632,	-12.2423	-12.2861	-12.2675	-11.9787	-12.0227	-11.942	-12.6397	-12.5578	-12.7323	-12.2639	-11.9957	-12.6467	0.00153311	0.0062176	0.00169303	0.00613865	-0.268225	-0.651014	0.83034	0.636833
b3736	atpF	chr	-	3918440,	3918911,	-9.76914	-9.71813	-9.75751	-9.46647	-9.5037	-9.43637	-9.99421	-10.0469	-10.0251	-9.74867	-9.48105	-10.0206	0.000468218	0.00322938	3.67366e-05	0.000775286	-0.267625	-0.539535	0.830686	0.687993
b3296	rpsD	chr	-	3439076,	3439697,	-7.47055	-7.44876	-7.42444	-7.19936	-7.17469	-7.17666	-7.42835	-7.45023	-7.45105	-7.44997	-7.18318	-7.44284	0.000268541	0.00237139	1.8764e-05	0.00052489	-0.266794	-0.259659	0.831165	0.835285
b0168	map	chr	-	188711,	189506,	-11.4825	-11.5198	-11.5289	-11.2558	-11.2442	-11.205	-11.5572	-11.5466	-11.5929	-11.508	-11.2421	-11.5666	0.000199656	0.0020432	9.68549e-05	0.00112767	-0.265897	-0.324464	0.831681	0.798595
b2573	rpoE	chr	-	2707458,	2708034,	-14.3349	-14.2743	-14.2777	-14.0191	-14.0488	-14.0045	-14.221	-14.24	-14.146	-14.2981	-14.0322	-14.1994	0.000687686	0.00404847	0.0132249	0.0248392	-0.265849	-0.16714	0.831709	0.890606
b3699	gyrB	chr	-	3875727,	3878142,	-10.6814	-10.6799	-10.6689	-10.3921	-10.4037	-10.5082	-10.8396	-10.847	-10.8034	-10.6773	-10.4148	-10.8288	0.0214706	0.0352479	0.00421342	0.0106306	-0.262489	-0.413987	0.833648	0.750546
b1294	sapA	chr	-	1353490,	1355134,	-13.9836	-13.9766	-14.0636	-13.7609	-13.7302	-13.7537	-14.1207	-13.9715	-14.0099	-14.0037	-13.7438	-14.0359	0.00657453	0.0150358	0.0200461	0.0337182	-0.259863	-0.292084	0.835167	0.816721
b1094	acpP	chr	+	1150837,	1151074,	-8.42969	-8.50625	-8.47602	-8.23028	-8.19062	-8.22314	-8.28328	-8.25729	-8.27207	-8.46806	-8.20857	-8.27159	0.00179741	0.00697929	0.0243955	0.0393418	-0.259481	-0.0630142	0.835388	0.957262
b3630	rfaP	chr	-	3803175,	3803973,	-14.8764	-14.8927	-14.7327	-14.6712	-14.5588	-14.4754	-15.1055	-15.214	-15.0715	-14.839	-14.5824	-15.1242	0.025733	0.0407192	0.00185964	0.00628715	-0.256633	-0.541864	0.837039	0.686883
b2517	yfgB	chr	-	2641150,	2642305,	-11.9458	-11.9355	-11.947	-11.7229	-11.6389	-11.7769	-11.9939	-11.981	-12.0181	-11.9427	-11.6864	-11.9986	0.028332	0.0439427	0.0143235	0.0260659	-0.256235	-0.312181	0.83727	0.805423
b4600	ydfJ	chr	-	1629025,	1650862,	-12.7145	-12.6315	-12.6937	-12.3635	-12.4549	-12.4754	-12.8101	-12.9259	-12.9938	-12.6805	-12.4267	-12.9075	0.00563539	0.0135709	0.00310707	0.00872369	-0.253802	-0.480785	0.838684	0.716587
b2937	speB	chr	-	3080898,	3081819,	-11.2876	-11.2978	-11.2757	-10.9912	-11.0431	-11.1086	-11.3919	-11.4251	-11.439	-11.2875	-11.035	-11.4183	0.0168268	0.0292467	0.00341206	0.00927097	-0.252543	-0.383322	0.839416	0.76667
b3424	glpG	chr	-	3558644,	3559475,	-13.8378	-13.9671	-13.8565	-13.6744	-13.6277	-13.5601	-14.1621	-14.314	-14.1666	-13.885	-13.6328	-14.2069	0.00768913	0.016509	0.00113657	0.00490723	-0.252216	-0.574091	0.839606	0.671709
b0194	proS	chr	-	217056,	218775,	-9.96871	-10.0094	-9.98634	-9.7287	-9.72502	-9.79159	-10.2132	-10.1201	-10.2016	-9.9872	-9.73595	-10.181	0.00201822	0.00749091	0.00046571	0.00298218	-0.251256	-0.445075	0.840165	0.734546
b3261	fis	chr	+	3409292,	3409589,	-10.738	-10.7325	-10.7429	-10.516	-10.4556	-10.5384	-11.5589	-11.4298	-11.535	-10.7375	-10.4877	-11.5113	0.0101266	0.0203461	0.000103837	0.00115513	-0.249868	-1.02361	0.840974	0.491884
b3190	yrbA	chr	-	3334570,	3334825,	-12.3725	-12.3168	-12.4198	-12.1828	-12.0734	-12.1334	-12.4548	-12.5195	-12.5765	-12.367	-12.118	-12.5162	0.00531337	0.0131039	0.00127053	0.00519118	-0.248974	-0.398264	0.841494	0.758771
b3313	rplP	chr	-	3446780,	3447191,	-8.07174	-8.05662	-8.05658	-7.81479	-7.81172	-7.82169	-8.06035	-8.08028	-8.04641	-8.06235	-7.81422	-8.06121	1.58451e-05	0.000691055	0.000715425	0.00371275	-0.248127	-0.24699	0.841989	0.842653
b1062	pyrC	chr	-	1120783,	1121830,	-11.3916	-11.4094	-11.404	-11.2042	-11.1262	-11.1421	-11.8433	-11.8577	-11.8436	-11.4011	-11.1542	-11.8476	0.00713419	0.0157499	0.000806907	0.00398001	-0.246884	-0.693472	0.842714	0.618364
b1054	lpxL	chr	-	1114884,	1115805,	-13.5564	-13.4973	-13.5375	-13.2235	-13.3151	-13.3196	-13.6544	-13.713	-13.6361	-13.5311	-13.2845	-13.6648	0.0056143	0.0135709	0.000899697	0.00432092	-0.246564	-0.380284	0.842902	0.768286
b3205	yhbJ	chr	+	3345136,	3345991,	-13.442	-13.4646	-13.4313	-13.2765	-13.1773	-13.1234	-13.636	-13.7829	-13.665	-13.4464	-13.2014	-13.6884	0.0253898	0.0402342	0.00137892	0.00527942	-0.244983	-0.486998	0.843826	0.713508
b2041	rfbB	chr	-	2109999,	2111085,	-10.5265	-10.544	-10.5741	-10.2869	-10.337	-10.2228	-10.8162	-10.8303	-10.8175	-10.5458	-10.3027	-10.8208	0.00731224	0.0160459	0.00325523	0.00895738	-0.24308	-0.518077	0.84494	0.698302
b1661	cfa	chr	+	1739436,	1740585,	-12.9437	-12.935	-13.0413	-12.7781	-12.6959	-12.7121	-13.2402	-13.1205	-13.1874	-12.968	-12.7253	-13.1853	0.00573772	0.0137479	0.000715358	0.00371275	-0.242726	-0.460028	0.845147	0.726972
b2114	metG	chr	+	2192321,	2194355,	-10.1923	-10.1925	-10.2281	-9.95599	-9.95788	-9.97624	-10.2785	-10.2811	-10.2538	-10.2026	-9.95996	-10.2704	0.000325673	0.00264157	1.83898e-05	0.00052489	-0.242595	-0.310487	0.845224	0.806369
b1238	tdk	chr	+	1292749,	1293367,	-12.9802	-12.9728	-12.9652	-12.7137	-12.7575	-12.6826	-13.2598	-13.3071	-13.2219	-12.9734	-12.7315	-13.2599	0.00562927	0.0135709	8.60339e-05	0.00112767	-0.241978	-0.528411	0.845585	0.693318
b2560	yfhB	chr	-	2695936,	2696572,	-14.8953	-14.8819	-14.818	-14.6457	-14.6338	-14.594	-15.0366	-14.9552	-15.1208	-14.8683	-14.6318	-15.041	0.00201692	0.00749091	0.00797134	0.0169159	-0.236571	-0.40921	0.84876	0.753035
b1344	ttcA	chr	-	1409036,	1409972,	-12.149	-12.076	-12.1204	-11.8983	-11.8569	-11.9203	-12.0967	-12.1356	-12.194	-12.1162	-11.8799	-12.1422	0.00148287	0.00608142	0.00309318	0.00870701	-0.236312	-0.262292	0.848913	0.833762
b0526	cysS	chr	+	553833,	555219,	-11.2262	-11.2399	-11.2354	-11.0161	-10.9671	-11.0723	-11.3003	-11.222	-11.2949	-11.2334	-10.9986	-11.2749	0.0179236	0.0307141	0.00336787	0.00919655	-0.234789	-0.27631	0.849809	0.8257
b2594	rluD	chr	-	2733052,	2734033,	-12.7272	-12.7155	-12.6117	-12.4301	-12.4478	-12.5368	-12.9731	-12.8143	-12.9048	-12.6894	-12.4546	-12.9006	0.0127484	0.0241748	0.00243828	0.0076066	-0.234705	-0.445918	0.849859	0.734117
b0661	miaB	chr	-	692753,	694178,	-10.7954	-10.8027	-10.7798	-10.5683	-10.5356	-10.62	-10.9811	-11.008	-10.9864	-10.7933	-10.5588	-10.9909	0.00861758	0.0178042	0.00153478	0.00565854	-0.234553	-0.432087	0.849948	0.741189
b4314	fimA	chr	+	4541137,	4541686,	-11.9294	-11.8525	-11.8824	-11.6489	-11.688	-11.5702	-12.4183	-12.6441	-12.4833	-11.89	-11.6568	-12.5052	0.00591337	0.0139852	0.00136993	0.00527599	-0.233137	-0.848308	0.850783	0.555436
b0143	pcnB	chr	-	157728,	159126,	-12.7745	-12.7711	-12.6946	-12.4871	-12.5115	-12.6078	-13.2458	-13.2968	-13.3689	-12.75	-12.5171	-13.3037	0.0121556	0.02327	0.000116745	0.00125329	-0.232941	-0.786579	0.850898	0.579717
b4025	pgi	chr	+	4231780,	4233430,	-9.01442	-9.02114	-9.02222	-8.7803	-8.79381	-8.78153	-9.09797	-9.10433	-9.09918	-9.01888	-8.78746	-9.10027	1.29805e-05	0.000676843	1.51525e-05	0.000494182	-0.231423	-0.312812	0.851794	0.805071
b1203	ychF	chr	-	1255943,	1257035,	-10.3142	-10.3355	-10.3501	-10.1235	-10.095	-10.0735	-10.5516	-10.6242	-10.6496	-10.3315	-10.1012	-10.6072	0.000334394	0.00269236	0.000663143	0.00350793	-0.230276	-0.505995	0.852472	0.704175
b0630	lipB	chr	-	660859,	661501,	-13.8152	-13.7012	-13.7884	-13.507	-13.5998	-13.4074	-14.0127	-14.0847	-13.9027	-13.7687	-13.5385	-13.9929	0.0223641	0.0362796	0.00298684	0.00851004	-0.230196	-0.454384	0.852519	0.729822
b0472	recR	chr	+	493628,	494234,	-14.182	-14.1608	-14.3111	-13.9668	-13.9649	-14.0699	-14.1569	-14.2598	-14.2032	-14.2106	-13.9806	-14.2031	0.0236153	0.0379161	0.0113172	0.0219333	-0.229918	-0.222486	0.852683	0.857087
b1847	yebF	chr	-	1928057,	1928414,	-14.8516	-14.8963	-14.8101	-14.6584	-14.6257	-14.5534	-15.221	-15.0671	-15.2907	-14.8542	-14.6255	-15.1975	0.00439262	0.0120549	0.00502664	0.0121173	-0.228683	-0.571983	0.853414	0.672692
b0576	pheP	chr	+	601181,	602558,	-13.4362	-13.5335	-13.3817	-13.2618	-13.233	-13.1086	-13.6655	-13.6994	-13.6468	-13.4517	-13.2233	-13.6687	0.0183356	0.0312248	0.00565782	0.0131815	-0.228383	-0.445414	0.853591	0.734373
b3165	rpsO	chr	-	3309436,	3309706,	-9.07451	-9.09585	-9.07833	-8.85309	-8.85635	-8.86456	-9.30122	-9.26082	-9.30024	-9.08267	-8.85647	-9.28884	7.73654e-05	0.00124581	0.000497578	0.00307824	-0.2262	-0.432366	0.854883	0.741046
b1633	nth	chr	+	1709546,	1710182,	-14.9177	-14.9036	-14.8793	-14.7507	-14.6419	-14.6644	-15.2101	-15.3631	-15.6042	-14.9019	-14.6807	-15.3858	0.0152643	0.0273191	0.0188621	0.0322719	-0.221169	-0.705091	0.85787	0.613404
b3170	yhbC	chr	-	3315575,	3316034,	-12.046	-12.0185	-11.9886	-11.8703	-11.7842	-11.7346	-12.3981	-12.4048	-12.4979	-12.0202	-11.8048	-12.4348	0.0186265	0.0315728	0.000300909	0.00221138	-0.215439	-0.63002	0.861284	0.646168
b3464	ftsY	chr	-	3600772,	3602266,	-11.8223	-11.8837	-11.8106	-11.664	-11.6162	-11.5651	-11.7755	-11.8229	-11.772	-11.839	-11.6242	-11.7881	0.00420038	0.0116001	0.0110906	0.0216475	-0.214805	-0.163894	0.861663	0.892612
b1830	prc	chr	-	1910791,	1912840,	-11.9229	-11.8671	-11.872	-11.6221	-11.7172	-11.6536	-12.0163	-12.0326	-12.0099	-11.8895	-11.6753	-12.0188	0.00448023	0.0121432	0.00422842	0.010644	-0.214191	-0.343474	0.862029	0.788141
b0742	ybgF	chr	+	778820,	779612,	-12.1912	-12.2057	-12.1509	-11.9648	-11.9899	-11.9551	-12.232	-12.2237	-12.2504	-12.1843	-11.9763	-12.236	0.000932965	0.00468622	5.75616e-05	0.000897033	-0.207998	-0.259717	0.865738	0.835252
b3204	ptsN	chr	+	3344599,	3345091,	-13.3763	-13.337	-13.3773	-13.0798	-13.2254	-13.0988	-13.8688	-13.9024	-13.6007	-13.3634	-13.1562	-13.7768	0.0296262	0.0454989	0.00961947	0.0196884	-0.207153	-0.620574	0.866245	0.650412
b3195	yrbF	chr	-	3337277,	3338087,	-12.9519	-12.8936	-12.9291	-12.7695	-12.6791	-12.7537	-12.8774	-12.9207	-12.8313	-12.9258	-12.7197	-12.8733	0.00759144	0.0163634	0.020218	0.0338513	-0.206054	-0.153581	0.866905	0.899016
b2040	rfbD	chr	-	2109100,	2110000,	-11.3432	-11.3123	-11.3111	-11.1155	-11.1373	-11.0723	-11.5623	-11.5857	-11.579	-11.3236	-11.1202	-11.5751	0.00192972	0.0073558	0.000541332	0.0032041	-0.203464	-0.454944	0.868463	0.729538
b3614	yibQ	chr	+	3786123,	3787083,	-14.8424	-14.9257	-14.9302	-14.6394	-14.752	-14.6078	-15.243	-15.3348	-15.36	-14.8947	-14.6916	-15.3108	0.0156071	0.0276982	0.000413533	0.00278299	-0.203036	-0.619148	0.868721	0.651055
b1288	fabI	chr	-	1348274,	1349063,	-8.95357	-8.95732	-8.93398	-8.74038	-8.74992	-8.765	-8.93125	-8.94485	-8.95559	-8.94917	-8.74895	-8.94388	4.25919e-05	0.000914474	4.42099e-05	0.000775286	-0.200224	-0.194934	0.870415	0.873613
b3341	rpsG	chr	-	3471563,	3472103,	-7.161	-7.16068	-7.18443	-6.97084	-6.99913	-6.87424	-7.16357	-7.19528	-7.18766	-7.16757	-6.9705	-7.18143	0.0241743	0.0386436	0.0199048	0.0335319	-0.197067	-0.210927	0.872322	0.863982
b1211	prfA	chr	+	1264234,	1265317,	-13.0544	-13.0405	-13.1118	-12.862	-12.8904	-12.8245	-13.0584	-13.0788	-13.1108	-13.0659	-12.8709	-13.0829	0.00206391	0.00750049	0.000983725	0.00452679	-0.194982	-0.211952	0.873584	0.863369
b2296	ackA	chr	+	2411491,	2412694,	-10.1159	-10.0676	-10.1155	-9.92087	-9.90511	-9.90527	-10.8533	-10.8577	-10.893	-10.0995	-9.91038	-10.8686	0.003814	0.0109043	1.91741e-05	0.00052489	-0.189132	-0.95824	0.877133	0.514684
b2514	hisS	chr	-	2637322,	2638597,	-10.7805	-10.7832	-10.7384	-10.5717	-10.5764	-10.6122	-10.8049	-10.7586	-10.818	-10.7692	-10.5801	-10.7957	0.000791459	0.00429033	0.00116417	0.0049397	-0.189113	-0.215619	0.877145	0.861177
b3931	hslU	chr	-	4118438,	4119770,	-11.1573	-11.2108	-11.1782	-11.0013	-10.9906	-10.9965	-11.3706	-11.4112	-11.3778	-11.1809	-10.995	-11.385	0.00540084	0.0132302	0.000560079	0.00322782	-0.185858	-0.389989	0.879126	0.763135
b2400	gltX	chr	-	2517278,	2518694,	-9.54632	-9.55248	-9.55661	-9.35834	-9.36039	-9.42334	-9.66037	-9.6561	-9.66979	-9.55131	-9.36887	-9.66245	0.0138371	0.025608	0.0044955	0.0111877	-0.182434	-0.293575	0.881215	0.815878
b3248	yhdE	chr	-	3395806,	3396400,	-14.8796	-14.9331	-14.8876	-14.7237	-14.7258	-14.7084	-15.221	-15.2531	-15.1108	-14.8995	-14.7225	-15.19	0.00460651	0.0123328	0.00735776	0.015891	-0.176988	-0.467482	0.884548	0.723226
b2316	accD	chr	-	2431033,	2431948,	-10.2655	-10.2759	-10.269	-10.0777	-10.1076	-10.0867	-10.2206	-10.2237	-10.2092	-10.27	-10.0944	-10.2175	0.000949843	0.00474922	0.0011383	0.00490723	-0.17552	-0.123028	0.885448	0.918258
b3701	dnaN	chr	-	3879243,	3880344,	-12.1424	-12.1036	-12.0571	-11.9249	-11.9302	-11.9354	-12.5983	-12.6463	-12.5061	-12.1047	-11.9292	-12.5785	0.0189809	0.0320584	0.00378694	0.00992033	-0.175417	-0.64925	0.885511	0.637612
b3833	ubiE	chr	+	4016877,	4017633,	-12.1154	-12.2538	-12.1629	-12.0346	-11.9828	-11.9796	-12.1939	-12.1387	-12.1233	-12.1738	-11.9994	-12.1522	0.0325531	0.0489638	0.00591562	0.013539	-0.174406	-0.152746	0.886132	0.899537
b1244	oppB	chr	+	1300922,	1301843,	-12.0984	-12.1348	-12.113	-11.9797	-11.9179	-11.9354	-12.3858	-12.3037	-12.3307	-12.1146	-11.9409	-12.3416	0.00317458	0.0096829	0.000299755	0.00221138	-0.173774	-0.400713	0.88652	0.757484
b4052	dnaB	chr	+	4262336,	4263752,	-13.0482	-13.0957	-13.032	-12.9221	-12.8723	-12.8612	-13.1156	-13.0469	-13.0595	-13.0591	-12.8871	-13.0751	0.00292574	0.00925921	0.00273317	0.00812615	-0.172046	-0.188011	0.887583	0.877815
b3731	atpC	chr	-	3913575,	3913995,	-11.4241	-11.4646	-11.4081	-11.2869	-11.2473	-11.2598	-11.4168	-11.341	-11.3533	-11.4328	-11.2623	-11.3715	0.00194139	0.0073558	0.0286174	0.0445748	-0.170549	-0.1092	0.888504	0.927102
b2133	dld	chr	+	2220206,	2221922,	-12.956	-12.9434	-12.9774	-12.7991	-12.7797	-12.8005	-12.9056	-12.9128	-12.9244	-12.9579	-12.7892	-12.9144	0.000344072	0.0027105	0.000192153	0.0016571	-0.168647	-0.125146	0.889677	0.916911
b0437	clpP	chr	+	455900,	456524,	-11.2237	-11.2284	-11.2211	-11.0486	-11.0778	-10.9988	-11.1099	-11.1587	-11.1894	-11.2245	-11.0561	-11.1522	0.0149691	0.0268708	0.0274076	0.0430327	-0.168447	-0.0960949	0.8898	0.935562
b2312	purF	chr	-	2426742,	2428260,	-12.1614	-12.2142	-12.1995	-11.9867	-12.072	-11.964	-12.409	-12.4382	-12.4157	-12.1897	-12.0267	-12.42	0.0166297	0.0289499	0.0039799	0.0102783	-0.162969	-0.393248	0.893185	0.761413
b0632	dacA	chr	-	661974,	663186,	-10.7149	-10.74	-10.7334	-10.5631	-10.5887	-10.5551	-11.03	-10.9647	-10.962	-10.7285	-10.5751	-10.9862	0.000351433	0.00274238	0.000651507	0.00346311	-0.15344	-0.411149	0.899104	0.752024
b0406	tgt	chr	+	425360,	426488,	-11.9933	-12.0004	-12.0101	-11.8115	-11.864	-11.8695	-12.3039	-12.1964	-12.2032	-12.0005	-11.847	-12.2356	0.0103462	0.0206735	0.0021077	0.00680806	-0.153435	-0.388527	0.899107	0.763909
b3251	mreB	chr	-	3398065,	3399109,	-10.6978	-10.6409	-10.6426	-10.5197	-10.5022	-10.5343	-10.8731	-11.0073	-10.9727	-10.6628	-10.5128	-10.947	0.00704757	0.0156412	0.00630622	0.0142085	-0.15008	-0.434235	0.901201	0.740086
b0058	rluA	chr	-	59686,	60346,	-15.3457	-15.3199	-15.413	-15.2118	-15.2208	-15.1585	-15.6507	-15.6994	-15.5225	-15.3559	-15.2084	-15.6175	0.0114053	0.0222618	0.00832192	0.0174235	-0.147522	-0.409159	0.9028	0.753062
b2891	prfB	chr	-	3033205,	3034304,	-10.2559	-10.2029	-10.2729	-10.0594	-10.1161	-10.1086	-10.3262	-10.3283	-10.2978	-10.2429	-10.0958	-10.3166	0.00613113	0.0143299	0.00135677	0.00527599	-0.147068	-0.220837	0.903084	0.858068
b0438	clpX	chr	+	456649,	457924,	-10.6558	-10.63	-10.605	-10.486	-10.4953	-10.5434	-10.8444	-10.8137	-10.9189	-10.6325	-10.4992	-10.8612	0.00675724	0.015256	0.00179998	0.00627378	-0.133305	-0.361964	0.91174	0.778105
b3317	rplB	chr	-	3448564,	3449386,	-7.22467	-7.18467	-7.19141	-7.05352	-7.08033	-7.06117	-7.23351	-7.2628	-7.24644	-7.20172	-7.06847	-7.2467	0.00158095	0.00634118	9.87443e-05	0.00112767	-0.133251	-0.178226	0.911775	0.883789
b1279	yciS	chr	+	1338266,	1338575,	-14.947	-15.0018	-15.0056	-14.8132	-14.8904	-14.8005	-15.1886	-15.3209	-15.3718	-14.9817	-14.8507	-15.2906	0.0152688	0.0273191	0.00502603	0.0121173	-0.131068	-0.439917	0.913155	0.737177
b3057	bacA	chr	-	3201331,	3202153,	-13.022	-13.0526	-12.9498	-12.862	-12.9025	-12.8448	-13.3287	-13.4477	-13.3278	-13.0109	-12.8802	-13.3625	0.0263571	0.0415865	0.00221394	0.00704727	-0.13067	-0.482266	0.913407	0.715852
b3300	secY	chr	-	3440787,	3442119,	-8.71191	-8.73459	-8.6891	-8.57356	-8.58952	-8.58718	-9.18507	-9.18647	-9.20706	-8.71281	-8.58382	-9.19326	0.00504949	0.0128365	9.43133e-07	0.000146024	-0.128985	-0.609437	0.914475	0.655452
b0439	lon	chr	+	458111,	460466,	-10.8861	-10.9013	-10.9184	-10.7695	-10.808	-10.7662	-10.9887	-10.9831	-10.9773	-10.9003	-10.7888	-10.983	0.00278195	0.00894229	0.0028837	0.008398	-0.111516	-0.19415	0.925615	0.874088
b0948	rlmL	chr	+	1007066,	1009175,	-12.3598	-12.3235	-12.3474	-12.2212	-12.243	-12.2557	-12.6233	-12.5416	-12.4995	-12.3441	-12.2376	-12.5542	0.00214431	0.00772373	0.00902558	0.0185771	-0.10655	-0.316671	0.928807	0.802921
b3307	rpsN	chr	-	3444600,	3444906,	-7.95396	-7.97409	-8.01877	-7.87223	-7.88432	-7.8691	-8.01146	-8.01781	-8.01167	-7.97898	-7.878	-8.01341	0.0251695	0.039943	0.000188371	0.0016571	-0.100975	-0.135403	0.932403	0.910416
b0960	yccS	chr	-	1020952,	1023106,	-14.3631	-14.4052	-14.41	-14.2887	-14.3022	-14.2859	-14.7816	-14.7734	-14.775	-14.3904	-14.2953	-14.7768	0.0139155	0.0256955	4.30476e-06	0.000232895	-0.095126	-0.481564	0.93619	0.716201
b4391	yjjK	chr	-	4626877,	4628545,	-10.0327	-10.0445	-10.0842	-9.95012	-9.96631	-9.94196	-10.0183	-10.0178	-9.99436	-10.0512	-9.95725	-10.0096	0.0117261	0.0227257	0.00593268	0.013539	-0.0939445	-0.0523651	0.936958	0.964354
b3255	accB	chr	+	3403457,	3403928,	-9.96715	-9.9679	-9.94935	-9.84558	-9.88598	-9.86949	-10.1271	-10.1182	-10.0846	-9.96228	-9.86992	-10.1092	0.00563907	0.0135709	0.000164467	0.00154809	-0.0923605	-0.239329	0.937987	0.847139
b0967	yccW	chr	-	1028001,	1029192,	-12.4896	-12.5153	-12.485	-12.4071	-12.3936	-12.441	-12.9012	-12.9579	-12.9688	-12.4968	-12.405	-12.9417	0.0114947	0.0223962	8.27609e-05	0.0011188	-0.0917294	-0.536623	0.938397	0.689383
b1717	rpmI	chr	-	1797825,	1798023,	-8.37154	-8.36373	-8.36841	-8.29169	-8.27412	-8.27228	-8.52824	-8.53036	-8.50975	-8.36804	-8.27969	-8.52226	0.00203989	0.00750049	1.14511e-05	0.000432379	-0.08835	-0.24257	0.940598	0.845238
b1636	pdxY	chr	-	1713049,	1713913,	-12.583	-12.5578	-12.5565	-12.4729	-12.472	-12.5171	-12.8391	-12.829	-12.7554	-12.5669	-12.4789	-12.8059	0.0171323	0.0296364	0.00143589	0.00542174	-0.0880182	-0.326954	0.940814	0.797218
b4059	ssb	chr	+	4272147,	4272684,	-10.4054	-10.3639	-10.3749	-10.3058	-10.304	-10.2503	-10.5877	-10.5768	-10.6055	-10.3827	-10.2965	-10.5908	0.0165985	0.0289417	0.000893526	0.00432092	-0.0862417	-0.294268	0.941973	0.815486
b3649	rpoZ	chr	+	3820128,	3820404,	-11.4801	-11.4805	-11.5297	-11.4038	-11.4104	-11.4135	-12.0092	-12.0412	-12.0392	-11.4943	-11.4086	-12.0292	0.0304553	0.0463819	0.00010824	0.00117349	-0.0856286	-0.620601	0.942374	0.6504
b4058	uvrA	chr	-	4269071,	4271894,	-12.3797	-12.4175	-12.3612	-12.3099	-12.307	-12.2943	-12.8433	-12.8365	-12.7515	-12.3868	-12.3061	-12.808	0.0302306	0.046168	0.00275401	0.00815039	-0.0806939	-0.501955	0.945603	0.706149
b2780	pyrG	chr	-	2906050,	2907688,	-9.19271	-9.23282	-9.2134	-9.16967	-9.15661	-9.15568	-9.75685	-9.75777	-9.76567	-9.21188	-9.16082	-9.76025	0.032449	0.0488744	4.24891e-07	7.75425e-05	-0.0510587	-0.599433	0.965228	0.660014
b2904	gcvH	chr	-	3047181,	3047571,	-9.48166	-9.44127	-9.47656	-9.54083	-9.54169	-9.52364	-9.21758	-9.2629	-9.2429	-9.46665	-9.53871	-9.23984	0.0185632	0.0315632	0.000414271	0.00278299	0.0720589	0.298875	1.05122	1.23018
b0755	gpmA	chr	-	786065,	786818,	-9.07283	-9.09638	-9.04923	-9.18956	-9.15206	-9.15251	-9.02459	-9.0238	-9.01196	-9.07378	-9.16455	-9.01986	0.00772376	0.0165186	0.0039102	0.0101221	0.0907689	0.144697	1.06494	1.1055
b2463	maeB	chr	-	2574119,	2576399,	-10.7029	-10.687	-10.6439	-10.7991	-10.8038	-10.7867	-9.76903	-9.78352	-9.77994	-10.6805	-10.7996	-9.77717	0.015462	0.0275748	1.62967e-08	8.92244e-06	0.119169	1.02248	1.08611	2.03141
b2277	nuoM	chr	-	2389533,	2391063,	-9.44357	-9.45743	-9.41359	-9.55971	-9.55326	-9.63276	-9.38772	-9.36781	-9.37333	-9.43948	-9.56696	-9.3767	0.0155862	0.0276982	0.0116874	0.0224567	0.127476	0.190255	1.09238	1.14097
b2996	hybA	chr	-	3142175,	3143162,	-15.2575	-15.2029	-15.2264	-15.3493	-15.3816	-15.331	-14.9708	-14.9128	-14.8313	-15.2302	-15.3632	-14.9029	0.00452149	0.0121959	0.00385504	0.0100357	0.132929	0.460299	1.09652	1.37583
b3894	fdoG	chr	-	4080794,	4083845,	-10.1743	-10.2102	-10.2195	-10.3413	-10.3263	-10.3577	-9.49555	-9.45266	-9.53102	-10.1991	-10.3359	-9.49517	0.00193668	0.0073558	0.000143008	0.00142358	0.136879	0.840768	1.09952	1.791
b1089	rpmF	chr	+	1146589,	1146763,	-9.22889	-9.15339	-9.19479	-9.32676	-9.35214	-9.35081	-9.23299	-9.2367	-9.20972	-9.19366	-9.34342	-9.22576	0.011974	0.0230268	0.000587358	0.00328141	0.149755	0.117656	1.10938	1.08497
b3919	tpiA	chr	-	4108762,	4109530,	-9.70347	-9.68932	-9.70599	-9.83472	-9.85982	-9.85295	-9.69529	-9.71555	-9.71186	-9.69947	-9.85037	-9.70713	0.000174999	0.00198336	0.000160487	0.00154809	0.150902	0.143237	1.11026	1.10438
b3405	ompR	chr	-	3533886,	3534606,	-11.6039	-11.5711	-11.6048	-11.7137	-11.7792	-11.7233	-11.4914	-11.5255	-11.5756	-11.5932	-11.7487	-11.531	0.00756371	0.0163358	0.00317053	0.00883392	0.155508	0.217701	1.11381	1.16288
b1854	pykA	chr	+	1935672,	1937115,	-10.0693	-10.0322	-10.0477	-10.2372	-10.1722	-10.2653	-9.83232	-9.81279	-9.85191	-10.0507	-10.2072	-9.83344	0.0143188	0.0262113	0.00171738	0.0061465	0.156518	0.373769	1.11459	1.29573
b3908	sodA	chr	+	4098832,	4099453,	-9.53392	-9.53974	-9.55068	-9.70647	-9.72866	-9.65588	-9.10725	-9.15251	-9.16094	-9.54064	-9.71022	-9.13949	0.0149457	0.0268708	5.37493e-05	0.000878439	0.169582	0.570734	1.12473	1.48528
b2580	ung	chr	+	2714775,	2715465,	-13.3136	-13.2684	-13.2185	-13.4729	-13.4603	-13.3658	-13.1939	-13.1821	-13.2112	-13.2708	-13.45	-13.1965	0.020341	0.0336414	0.0152755	0.0273311	0.17924	0.253482	1.13229	1.19208
b1603	pntA	chr	-	1674394,	1675927,	-10.6892	-10.7069	-10.6353	-10.8625	-10.8427	-10.9496	-10.4222	-10.443	-10.4362	-10.6794	-10.8648	-10.4333	0.00914644	0.0185814	0.00416168	0.0105915	0.185381	0.431454	1.13712	1.34859
b2616	recN	chr	+	2749816,	2751478,	-13.6698	-13.7059	-13.5945	-13.8168	-13.8879	-13.7926	-13.4939	-13.4591	-13.5028	-13.6596	-13.8495	-13.4867	0.0162571	0.028437	0.00208963	0.00676965	0.189899	0.36278	1.14068	1.2859
b0917	ycaR	chr	+	969895,	970078,	-13.2153	-13.1652	-13.102	-13.4507	-13.3249	-13.3253	-12.8602	-12.9472	-13.141	-13.1654	-13.3658	-12.9807	0.0198665	0.033212	0.0264268	0.041999	0.200331	0.385033	1.14896	1.30589
b2552	hmp	chr	+	2683856,	2685047,	-12.8356	-12.7997	-12.8782	-13.0232	-13.0706	-12.9909	-12.3126	-12.3703	-12.3206	-12.8355	-13.0426	-12.3323	0.00420568	0.0116001	3.05724e-05	0.000712273	0.207102	0.710359	1.15437	1.63621
b0121	speE	chr	-	135597,	136464,	-11.2463	-11.2605	-11.2331	-11.4576	-11.4679	-11.4029	-11.3097	-11.2943	-11.2718	-11.2472	-11.4546	-11.2916	0.00491362	0.012746	0.00653588	0.0146656	0.207465	0.163054	1.15466	1.11965
b0652	gltL	chr	-	683752,	684478,	-15.5958	-15.5751	-15.526	-15.7643	-15.752	-15.916	-14.8645	-15.1144	-14.9778	-15.5686	-15.7794	-14.9751	0.0302272	0.046168	0.00115606	0.0049397	0.210727	0.804267	1.15727	1.74626
b1612	fumA	chr	-	1684754,	1686401,	-10.5497	-10.552	-10.5642	-10.743	-10.7907	-10.7604	-9.90043	-9.84828	-9.92356	-10.5546	-10.7701	-9.89294	0.00215738	0.00774536	2.38211e-05	0.000606607	0.215496	0.877168	1.1611	1.83677
b3926	glpK	chr	-	4113736,	4115245,	-8.026	-8.05057	-8.01877	-8.24338	-8.26066	-8.21899	-7.08043	-7.08024	-7.06147	-8.03204	-8.24863	-7.0736	0.000231719	0.00218735	3.40064e-06	0.000219041	0.216586	1.17502	1.16198	2.25797
b3320	rplC	chr	-	3450318,	3450948,	-7.33661	-7.33727	-7.35107	-7.57309	-7.56056	-7.52109	-7.42515	-7.42578	-7.4214	-7.34095	-7.55879	-7.424	0.00309271	0.00951301	0.0142381	0.0260641	0.217834	0.134788	1.16299	1.09793
b3253	yhdH	chr	+	3401505,	3402480,	-13.1869	-13.1641	-13.2465	-13.3964	-13.4056	-13.5009	-13.2155	-13.1821	-13.2059	-13.196	-13.4163	-13.2022	0.00613764	0.0143299	0.0140353	0.0258309	0.220289	0.214085	1.16497	1.15997
b1602	pntB	chr	-	1672995,	1674384,	-11.6985	-11.7252	-11.6687	-11.9619	-11.8753	-11.9841	-11.5841	-11.6226	-11.62	-11.6987	-11.9196	-11.6081	0.00784621	0.0166827	0.00486842	0.011876	0.220941	0.311474	1.16549	1.24098
b2994	hybC	chr	-	3139307,	3141011,	-13.5464	-13.3987	-13.4731	-13.7371	-13.6583	-13.7384	-13.0633	-13.0157	-12.9869	-13.4749	-13.696	-13.0217	0.013765	0.0255469	4.67296e-05	0.000775286	0.221044	0.674268	1.16558	1.59579
b0809	glnQ	chr	-	844963,	845686,	-13.9785	-13.9425	-13.9718	-14.2071	-14.1553	-14.253	-13.6433	-13.5825	-13.6077	-13.9645	-14.1867	-13.6125	0.00681165	0.0153472	0.000191577	0.0016571	0.22215	0.574164	1.16647	1.48881
b4174	hflK	chr	+	4400060,	4401320,	-11.1394	-11.1207	-11.1142	-11.339	-11.3668	-11.3069	-11.2006	-11.1533	-11.0923	-11.1259	-11.3485	-11.1474	0.00227443	0.00800805	0.0121042	0.0230506	0.222531	0.201054	1.16678	1.14954
b4392	slt	chr	+	4628755,	4630693,	-14.0298	-14.0215	-14.0078	-14.2306	-14.2735	-14.179	-14.027	-14.073	-13.9244	-14.0207	-14.2447	-14.0027	0.0131784	0.0247519	0.0191881	0.0327784	0.224008	0.242019	1.16797	1.18265
b1779	gapA	chr	+	1860794,	1861790,	-5.76556	-5.77999	-5.78595	-6.02277	-5.99269	-5.99678	-5.83183	-5.79835	-5.8007	-5.77618	-6.00328	-5.8108	0.000112257	0.00153651	0.000193004	0.0016571	0.227102	0.192478	1.17048	1.14272
b3789	rffH	chr	+	3971630,	3972512,	-14.0686	-14.0556	-14.1241	-14.3805	-14.2578	-14.331	-14.1464	-14.0847	-14.038	-14.0799	-14.3086	-14.089	0.0081993	0.0171668	0.00830358	0.0174184	0.228679	0.219626	1.17176	1.16443
b0095	ftsZ	chr	+	105304,	106456,	-9.93186	-9.98761	-9.94008	-10.1401	-10.176	-10.3005	-9.90976	-9.86083	-9.88822	-9.95254	-10.1816	-9.88753	0.0246453	0.0393391	0.0162847	0.0286684	0.229053	0.294065	1.17207	1.22609
b4043	lexA	chr	+	4255137,	4255746,	-12.6074	-12.5824	-12.5293	-12.7886	-12.7853	-12.9332	-12.2967	-12.3401	-12.4281	-12.5764	-12.8075	-12.3551	0.0186017	0.0315728	0.00185442	0.00628715	0.231107	0.45233	1.17374	1.36825
b4214	cysQ	chr	+	4434777,	4435518,	-13.9718	-13.935	-14.0565	-14.2789	-14.1996	-14.1284	-13.6655	-13.6333	-13.8686	-13.983	-14.2146	-13.7245	0.0203183	0.0336414	0.00906592	0.0186251	0.231612	0.490184	1.17415	1.40462
b0222	lpcA	chr	+	243542,	244121,	-10.9859	-10.969	-10.9993	-11.1886	-11.245	-11.1945	-10.8339	-10.8805	-10.8718	-10.9841	-11.2184	-10.861	0.00171868	0.00679512	0.000149848	0.0014742	0.234298	0.357391	1.17633	1.28111
b4252	yjgK	chr	+	4472884,	4473337,	-10.6175	-10.5881	-10.6287	-10.857	-10.8696	-10.7403	-10.5606	-10.6815	-10.599	-10.6108	-10.8455	-10.6091	0.0280556	0.0435758	0.0193063	0.0328777	0.234671	0.236425	1.17664	1.17807
b2287	nuoB	chr	-	2401972,	2402635,	-10.2459	-10.2635	-10.2013	-10.4853	-10.4556	-10.5106	-9.59207	-9.63331	-9.5814	-10.2388	-10.4735	-9.60028	0.000603133	0.00375245	2.50949e-06	0.000183193	0.234744	0.873239	1.1767	1.83177
b1765	ydjA	chr	-	1846148,	1846700,	-12.7222	-12.5679	-12.6152	-12.8824	-12.9037	-12.8204	-12.4215	-12.5056	-12.511	-12.6387	-12.884	-12.4775	0.0192281	0.0322926	0.000585308	0.00328141	0.245272	0.406431	1.18532	1.3254
b2796	sdaC	chr	+	2926250,	2927540,	-8.02733	-8.01892	-8.03247	-8.27446	-8.27343	-8.29443	-8.11921	-8.08801	-8.08728	-8.026	-8.27687	-8.09857	3.91568e-05	0.000857533	0.000331929	0.00237557	0.250878	0.178301	1.18993	1.13155
b2797	sdaB	chr	+	2927597,	2928965,	-9.34142	-9.31545	-9.32832	-9.55562	-9.57608	-9.66803	-9.09108	-9.08377	-9.0779	-9.32899	-9.58243	-9.08423	0.0127649	0.0241748	0.00409089	0.0105015	0.253444	0.498204	1.19205	1.41245
b0929	ompF	chr	-	985116,	986205,	-8.17853	-8.17582	-8.17426	-8.42304	-8.43495	-8.43099	-8.10221	-8.06659	-8.07032	-8.1764	-8.43037	-8.08027	3.77218e-05	0.000857533	0.000411536	0.00278299	0.253969	0.3501	1.19248	1.27465
b3751	rbsB	chr	+	3934300,	3935191,	-11.1272	-11.1603	-11.1496	-11.3958	-11.3914	-11.4519	-10.7566	-10.6665	-10.6917	-11.1446	-11.4017	-10.7065	0.00127791	0.00561973	5.7623e-05	0.000897033	0.257131	0.695229	1.1951	1.61914
b3708	tnaA	chr	+	3886752,	3888168,	-8.54768	-8.56186	-8.53798	-8.81146	-8.81505	-8.78938	-6.5329	-6.52851	-6.51414	-8.54958	-8.81001	-6.52491	2.07809e-05	0.000734036	1.21941e-08	8.92244e-06	0.26043	2.2851	1.19784	4.87399
b1332	ynaJ	chr	+	1395388,	1395646,	-12.976	-13.0009	-12.9785	-13.2522	-13.2672	-13.1945	-12.5256	-12.4899	-12.5937	-12.985	-13.2512	-12.5387	0.00371059	0.0107489	9.36356e-05	0.00112767	0.266212	0.712488	1.20265	1.63863
b0963	mgsA	chr	-	1025779,	1026238,	-11.8938	-11.9252	-11.9405	-12.1555	-12.2019	-12.1867	-11.2946	-11.1956	-11.2368	-11.9175	-12.184	-11.2443	0.000174501	0.00198336	0.00012062	0.00126999	0.266522	0.939739	1.2029	1.91818
b4000	hupA	chr	+	4198303,	4198576,	-9.03392	-8.99464	-9.0417	-9.28505	-9.34134	-9.18836	-8.98027	-9.04674	-9.00357	-9.02294	-9.29884	-9.00792	0.0222572	0.0361596	0.0160276	0.0283525	0.275895	0.290921	1.21075	1.22342
b2564	pdxJ	chr	-	2699019,	2699751,	-12.1937	-12.1258	-12.1241	-12.4534	-12.4013	-12.5236	-12.2033	-12.1494	-12.1233	-12.1508	-12.4362	-12.1586	0.00322608	0.00973155	0.00351582	0.00948233	0.28548	0.277683	1.21882	1.21225
b3011	yqhD	chr	+	3153376,	3154540,	-11.9681	-11.9733	-11.9931	-12.2188	-12.287	-12.2943	-11.7118	-11.7187	-11.773	-11.9769	-12.2649	-11.7353	0.00377219	0.0108413	9.01425e-05	0.00112767	0.287958	0.529579	1.22091	1.44351
b3962	sthA	chr	-	4157412,	4158813,	-12.8174	-12.8855	-12.8534	-13.2259	-13.0747	-13.1842	-11.5921	-11.5155	-11.4914	-12.8501	-13.1398	-11.533	0.010623	0.0211493	2.37951e-05	0.000606607	0.289695	1.60674	1.22238	3.04563
b1647	ydhF	chr	-	1722759,	1723656,	-12.7456	-12.856	-12.8291	-13.1079	-13.0734	-13.1842	-12.7978	-12.7853	-12.7419	-12.8054	-13.1009	-12.774	0.00261245	0.00874812	0.00254393	0.00783598	0.295431	0.326834	1.22725	1.25426
b2388	glk	chr	-	2506482,	2507448,	-11.9234	-11.8805	-11.873	-12.2094	-12.2011	-12.1611	-11.6795	-11.7279	-11.7256	-11.8945	-12.1979	-11.71	0.00016335	0.00194422	2.54643e-05	0.000619632	0.303372	0.487901	1.23403	1.4024
b3176	glmM	chr	-	3320754,	3322092,	-10.8092	-10.7703	-10.8118	-11.0981	-11.0962	-11.1484	-10.9272	-10.9069	-10.926	-10.7969	-11.1045	-10.9208	0.000181129	0.00198336	0.00340015	0.0092616	0.307615	0.183701	1.23766	1.13579
b3209	elbB	chr	-	3347827,	3348481,	-11.1446	-11.1429	-11.0996	-11.4342	-11.4491	-11.4379	-11.357	-11.3551	-11.3629	-11.131	-11.4424	-11.3585	0.00104667	0.00504893	0.000484493	0.00303154	0.311443	0.0838895	1.24095	1.05987
b3037	ygiB	chr	+	3177765,	3178437,	-11.6593	-11.6889	-11.785	-12.0028	-12.0515	-11.9441	-11.5877	-11.6344	-11.6532	-11.7042	-12.0188	-11.6245	0.00469309	0.0124429	0.00120039	0.0050169	0.31459	0.394344	1.24366	1.31435
b1818	manY	chr	+	1901105,	1901906,	-10.142	-10.1136	-10.1272	-10.4376	-10.4634	-10.4833	-9.76479	-9.69069	-9.73132	-10.1282	-10.4577	-9.73073	0.000107804	0.0015134	3.97418e-05	0.000775286	0.329426	0.726935	1.25651	1.65512
b3207	yrbL	chr	+	3346473,	3347106,	-12.5439	-12.5153	-12.4834	-12.8787	-12.8474	-12.7926	-12.317	-12.2968	-12.2963	-12.5168	-12.8495	-12.3037	0.000796782	0.00429208	0.00119366	0.0050079	0.332615	0.545781	1.25929	1.45981
b4397	creA	chr	+	4633543,	4634017,	-13.2103	-13.2404	-13.1911	-13.5128	-13.5704	-13.6148	-13.2292	-13.1948	-13.164	-13.2147	-13.5573	-13.1956	0.00202494	0.00749091	0.00102623	0.00460002	0.342596	0.361691	1.26804	1.28493
b4203	rplI	chr	+	4424130,	4424580,	-7.46187	-7.46627	-7.53872	-7.83867	-7.82037	-7.83065	-7.62074	-7.61739	-7.5976	-7.48495	-7.82799	-7.61148	0.00391536	0.0110336	3.43591e-05	0.000767821	0.343034	0.216505	1.26842	1.16192
b0525	ppiB	chr	-	553165,	553660,	-9.69129	-9.72387	-9.68773	-10.0411	-10.0689	-10.0397	-9.70052	-9.74346	-9.70269	-9.70102	-10.0552	-9.71383	2.63351e-05	0.000779377	9.69341e-05	0.00112767	0.354188	0.34137	1.27827	1.26696
b0004	thrC	chr	+	3733,	5020,	-12.5608	-12.5993	-12.5301	-12.9708	-12.8783	-12.9818	-12.4532	-12.4122	-12.4004	-12.5645	-12.9238	-12.4221	0.00143826	0.00596551	0.00088799	0.00432092	0.359235	0.501631	1.28275	1.41581
b0678	nagB	chr	-	702033,	702834,	-11.6947	-11.7119	-11.7242	-12.1035	-12.0727	-11.9999	-11.5938	-11.488	-11.599	-11.7089	-12.0718	-11.5636	0.00488406	0.0127032	0.000530487	0.00315697	0.362941	0.508219	1.28605	1.42229
b3403	pck	chr	+	3530839,	3532462,	-9.20653	-9.20155	-9.23499	-9.58111	-9.58071	-9.56134	-8.96403	-8.95558	-8.9139	-9.21296	-9.57795	-8.94354	3.64493e-05	0.000857533	9.88646e-05	0.00112767	0.364992	0.634414	1.28787	1.55231
b4232	fbp	chr	-	4452633,	4453632,	-11.6814	-11.685	-11.6375	-12.0398	-12.0367	-12.0771	-11.8029	-11.9076	-11.8697	-11.6699	-12.0437	-11.8569	5.32252e-05	0.00105967	0.0139243	0.0257552	0.373816	0.186777	1.29578	1.13822
b1622	malY	chr	+	1698980,	1700153,	-14.4606	-14.4445	-14.351	-14.7304	-14.8759	-14.7233	-14.1886	-14.0671	-14.4452	-14.4231	-14.8027	-14.2356	0.00588812	0.0139852	0.0250159	0.040106	0.379646	0.567189	1.30102	1.48163
b2572	rseA	chr	-	2706775,	2707426,	-12.2915	-12.3041	-12.3612	-12.7054	-12.697	-12.6789	-12.4629	-12.4085	-12.4004	-12.3153	-12.6971	-12.4243	0.00124443	0.00551682	0.00196643	0.00654481	0.381749	0.272745	1.30292	1.2081
b0711	ybgJ	chr	+	742815,	743472,	-15.2252	-15.0947	-14.9875	-15.6331	-15.3953	-15.5534	-14.7978	-14.8818	-14.815	-15.1104	-15.4941	-14.8282	0.0123219	0.023547	0.00502829	0.0121173	0.383649	0.665825	1.30464	1.58648
b2802	fucI	chr	+	2933605,	2935381,	-12.801	-12.8827	-12.8261	-13.1978	-13.2193	-13.2859	-12.4309	-12.3209	-12.4234	-12.8349	-13.2217	-12.395	0.000394924	0.00290229	7.90695e-05	0.0011023	0.386769	0.826746	1.30746	1.77368
b1498	ydeN	chr	-	1578865,	1580548,	-12.8032	-12.7744	-12.815	-13.2165	-13.2299	-13.0275	-12.6507	-12.8192	-12.6797	-12.7969	-13.1936	-12.709	0.0279678	0.0435629	0.00704291	0.0153625	0.396688	0.484649	1.31648	1.39925
b2194	ccmH	chr	-	2289379,	2290432,	-15.8242	-15.7028	-15.767	-16.1387	-16.1907	-16.1384	-15.9616	-15.8514	-15.8813	-15.7665	-16.1653	-15.8998	0.00236838	0.008181	0.00593489	0.013539	0.398797	0.265508	1.31841	1.20206
b1105	ycfM	chr	+	1161860,	1162502,	-13.2222	-13.2142	-13.2211	-13.6113	-13.6257	-13.6288	-13.0657	-13.1084	-13.0216	-13.2192	-13.6213	-13.0622	1.2208e-05	0.000676843	0.00135899	0.00527599	0.402108	0.559135	1.32144	1.47339
b0882	clpA	chr	+	922486,	924763,	-11.8125	-11.828	-11.7478	-12.2486	-12.1862	-12.1509	-11.9289	-11.9783	-11.9915	-11.7988	-12.2014	-11.9655	0.000502716	0.00335655	0.00420979	0.0106306	0.402602	0.235908	1.32189	1.17765
b4382	deoA	chr	+	4616251,	4617574,	-12.1609	-12.1872	-12.1383	-12.5807	-12.5646	-12.5368	-12.1569	-12.2318	-12.2949	-12.1631	-12.5658	-12.2269	3.33817e-05	0.000857533	0.00879162	0.0181982	0.402699	0.338875	1.32198	1.26477
b1004	wrbA	chr	-	1066334,	1066931,	-13.8032	-13.8065	-13.7233	-14.2402	-14.0899	-14.4256	-13.7655	-13.7221	-13.8354	-13.7809	-14.1851	-13.7768	0.0317563	0.0480293	0.0286705	0.0445941	0.404201	0.408326	1.32336	1.32714
b0133	panC	chr	-	147943,	148795,	-12.1734	-12.1624	-12.2021	-12.6051	-12.5743	-12.6044	-12.357	-12.3296	-12.2206	-12.1779	-12.589	-12.2991	1.43877e-05	0.000691055	0.015453	0.0275523	0.411088	0.289828	1.32969	1.22249
b1000	cbpA	chr	-	1062077,	1062998,	-13.2811	-13.2719	-13.2943	-13.7104	-13.7172	-13.5804	-13.4325	-13.4515	-13.4963	-13.2818	-13.6938	-13.4605	0.0116623	0.0226523	0.0281721	0.0439437	0.412009	0.233289	1.33054	1.17551
b2193	narP	chr	+	2288521,	2289169,	-12.3035	-12.0505	-12.1433	-12.5944	-12.5909	-12.5534	-12.2924	-12.3454	-12.3497	-12.1694	-12.5864	-12.3281	0.0273429	0.0428334	0.000642296	0.00346311	0.416972	0.258276	1.33512	1.19605
b3306	rpsH	chr	-	3444174,	3444567,	-7.67213	-7.56646	-7.74294	-8.07436	-8.08612	-8.03827	-8.00351	-8.00592	-7.98279	-7.65556	-8.075	-7.99681	0.0109728	0.0216101	0.0241246	0.0390775	0.419441	0.0781837	1.33741	1.05569
b4144	yjeI	chr	+	4370831,	4371185,	-12.0606	-12.038	-12.0021	-12.4287	-12.4504	-12.5501	-12.1953	-12.1295	-12.2126	-12.0361	-12.4574	-12.1816	0.00231914	0.00806178	0.00427446	0.0107249	0.421294	0.275826	1.33913	1.21069
b3885	yihX	chr	+	4073575,	4074175,	-14.103	-14.1327	-14.0851	-14.5186	-14.5171	-14.6078	-14.131	-14.2269	-14.2086	-14.1076	-14.5307	-14.1863	0.0012431	0.00551682	0.00103146	0.00460002	0.423074	0.344442	1.34078	1.26966
b4239	treC	chr	-	4461076,	4462732,	-8.90448	-8.8697	-8.84801	-9.30787	-9.30389	-9.27761	-8.46782	-8.49117	-8.5076	-8.87655	-9.30128	-8.48876	0.000128934	0.00170099	1.06684e-06	0.000146024	0.424731	0.812522	1.34232	1.75628
b2995	hybB	chr	-	3141007,	3142186,	-15.337	-15.3847	-15.401	-15.8492	-15.7608	-15.8164	-14.6433	-14.6463	-14.907	-15.3709	-15.798	-14.7326	0.000280024	0.00239577	0.00383375	0.010019	0.427095	1.06544	1.34452	2.0928
b2065	dcd	chr	-	2139657,	2140239,	-12.7435	-12.7496	-12.7488	-13.1886	-13.151	-13.2315	-12.7301	-12.8119	-12.74	-12.747	-13.1752	-12.7573	0.00259535	0.00874432	0.000260105	0.00204903	0.428157	0.417889	1.34551	1.33597
b3426	glpD	chr	+	3560035,	3561541,	-8.23571	-8.2072	-8.20003	-8.63093	-8.65048	-8.70836	-8.34457	-8.34648	-8.35039	-8.21592	-8.65233	-8.3472	0.000561253	0.00359399	0.00516947	0.0122789	0.436404	0.305131	1.35323	1.23553
b4310	yjhT	chr	-	4535681,	4536788,	-15.6113	-15.6284	-15.4252	-15.8936	-16.0872	-15.9507	-13.8518	-13.8869	-13.7789	-15.5609	-15.9994	-13.8355	0.0085847	0.0178035	4.66249e-05	0.000775286	0.438486	2.16389	1.35518	4.48122
b4177	purA	chr	+	4402709,	4404008,	-9.64075	-9.6549	-9.62543	-10.074	-10.0732	-10.1421	-9.93363	-9.89947	-9.87522	-9.64102	-10.0835	-9.90257	0.000858436	0.00445492	0.0032471	0.00895738	0.442452	0.1809	1.35891	1.13359
b4381	deoC	chr	+	4615345,	4616125,	-11.2327	-11.2655	-11.1914	-11.6402	-11.714	-11.6429	-11.2101	-11.2067	-11.2106	-11.2315	-11.6783	-11.2093	0.000190252	0.00201356	0.00273344	0.00812615	0.446845	0.469043	1.36306	1.38419
b4213	cpdB	chr	-	4432644,	4434588,	-12.2412	-12.2743	-12.2675	-12.7304	-12.7312	-12.6183	-11.9605	-11.9579	-12.0428	-12.2597	-12.7136	-11.9884	0.00486125	0.012674	0.000186807	0.0016571	0.453949	0.725179	1.36978	1.65311
b1817	manX	chr	+	1900071,	1901043,	-10.7424	-10.7034	-10.7056	-11.1719	-11.1903	-11.1185	-10.1109	-10.1599	-10.177	-10.7188	-11.1733	-10.1485	0.000248116	0.00226406	4.49202e-06	0.000232895	0.454513	1.02475	1.37032	2.0346
b4167	yjeF	chr	+	4392088,	4393636,	-14.7364	-14.8289	-14.7103	-15.1387	-15.2703	-15.1998	-15.0559	-14.9879	-15.0523	-14.7588	-15.2146	-15.0343	0.00106963	0.00506606	0.0266887	0.0423148	0.455837	0.180386	1.37158	1.13319
b1829	htpX	chr	-	1909718,	1910600,	-12.1849	-12.1967	-12.2041	-12.7137	-12.6368	-12.6113	-12.3083	-12.3829	-12.338	-12.1943	-12.6582	-12.3405	0.00354253	0.0104276	0.00183861	0.00628715	0.463872	0.317643	1.37924	1.24629
b0425	panE	chr	-	442827,	443739,	-13.8953	-14.0989	-13.9563	-14.4179	-14.4693	-14.4503	-14.1207	-14.24	-14.0571	-13.9779	-14.4491	-14.1314	0.0126191	0.0240312	0.0225787	0.0371785	0.471203	0.31771	1.38626	1.24635
b4396	rob	chr	-	4632463,	4633333,	-12.1633	-12.2164	-12.2471	-12.6284	-12.7575	-12.5668	-12.2982	-12.3157	-12.3974	-12.2046	-12.684	-12.3379	0.00745019	0.0161814	0.0151315	0.0271178	0.47944	0.346055	1.3942	1.27108
b2095	gatZ	chr	-	2173080,	2174343,	-7.65544	-7.69508	-7.66655	-8.14794	-8.16413	-8.11598	-7.35868	-7.36882	-7.35002	-7.67171	-8.15148	-7.35857	1.83019e-05	0.000691055	5.85841e-05	0.000897033	0.479768	0.792903	1.39452	1.73256
b4033	malF	chr	-	4241553,	4243098,	-13.9404	-13.8765	-13.7593	-14.2987	-14.385	-14.3541	-12.7655	-12.8143	-12.777	-13.8654	-14.351	-12.7839	0.00436127	0.011999	7.43489e-06	0.000325648	0.485666	1.56719	1.40023	2.96327
b3357	crp	chr	+	3484141,	3484774,	-10.6536	-10.6402	-10.6575	-11.1595	-11.1674	-10.9977	-10.7413	-10.8034	-10.8226	-10.6502	-11.1383	-10.7881	0.0136662	0.0254498	0.0163807	0.028745	0.488059	0.350195	1.40256	1.27473
b2093	gatB	chr	-	2172303,	2172588,	-9.44139	-9.43441	-9.42487	-9.96732	-9.93071	-9.83052	-8.93839	-8.99602	-8.95825	-9.43432	-9.92739	-8.96227	0.0067028	0.0151958	0.000468736	0.0029841	0.493067	0.965121	1.40743	1.95223
b0795	ybhG	chr	-	828196,	829195,	-14.5328	-14.662	-14.5826	-14.9472	-15.2026	-15.0045	-14.5172	-14.6638	-14.6834	-14.589	-15.0828	-14.6175	0.0140843	0.0259198	0.0135357	0.025164	0.49385	0.46531	1.4082	1.38061
b0800	ybiB	chr	+	834470,	835433,	-13.0994	-12.996	-13.0124	-13.4071	-13.6117	-13.6218	-13.0318	-12.9102	-13.0837	-13.0393	-13.5415	-13.0126	0.00854476	0.0177543	0.00453773	0.0112671	0.502174	0.528867	1.41635	1.4428
b1066	rimJ	chr	+	1124784,	1125369,	-14.2636	-14.2347	-14.5033	-14.8639	-14.8474	-14.6936	-14.5239	-14.4899	-14.3192	-14.3182	-14.8289	-14.4381	0.0143592	0.0262113	0.0134718	0.0251305	0.510736	0.390758	1.42478	1.31108
b0480	ushA	chr	+	504137,	505790,	-12.5932	-12.5463	-12.5911	-13.1101	-13.0816	-13.0795	-12.7556	-12.7616	-12.676	-12.5768	-13.0907	-12.7285	3.58427e-05	0.000857533	0.00267475	0.00804629	0.513902	0.362222	1.42791	1.2854
b2096	gatY	chr	-	2174371,	2175226,	-8.54951	-8.54369	-8.51204	-9.04603	-9.05875	-9.06302	-8.05646	-8.09828	-8.05334	-8.53675	-9.05512	-8.06756	6.6685e-05	0.00117774	4.51971e-05	0.000775286	0.518366	0.987562	1.43233	1.98283
b2092	gatC	chr	-	2170944,	2172300,	-7.20569	-7.20738	-7.21067	-7.73007	-7.73568	-7.74092	-7.08765	-7.07411	-7.04753	-7.20768	-7.73458	-7.06929	1.23894e-06	0.000323462	0.000132413	0.00135507	0.526901	0.66529	1.44083	1.58589
b0003	thrB	chr	+	2800,	3733,	-14.5352	-14.7187	-14.5792	-14.9787	-15.2269	-15.1998	-14.688	-14.4667	-14.4452	-14.6067	-15.1353	-14.5321	0.00746096	0.0161814	0.0055094	0.0129182	0.528628	0.603169	1.44256	1.51905
b3713	yieF	chr	+	3892674,	3893241,	-13.5254	-13.5449	-13.5457	-14.0398	-14.1351	-13.9074	-13.6288	-13.7687	-13.7515	-13.5377	-14.0672	-13.7123	0.0169732	0.0294077	0.0223871	0.0369742	0.529525	0.354865	1.44345	1.27887
b0382	iraP	chr	+	400609,	400870,	-15.3852	-15.2909	-15.5001	-15.9087	-15.9001	-15.9863	-15.2996	-15.3631	-15.4203	-15.3844	-15.9155	-15.3604	0.00506773	0.0128365	0.000289057	0.00216793	0.531033	0.555089	1.44496	1.46926
b0478	ybaL	chr	-	500785,	502462,	-12.755	-12.8091	-12.7583	-13.3212	-13.2562	-13.4754	-12.93	-12.8792	-13.0053	-12.7737	-13.3086	-12.9409	0.00872083	0.0179498	0.0101795	0.0204523	0.534873	0.367703	1.44881	1.2903
b0471	ybaB	chr	+	493299,	493629,	-10.8131	-10.7471	-10.8029	-11.3105	-11.331	-11.3382	-11.1582	-11.1433	-11.1296	-10.7879	-11.3252	-11.1436	0.000353129	0.00274238	9.77079e-05	0.00112767	0.537271	0.18165	1.45122	1.13418
b0419	yajO	chr	-	436384,	437359,	-14.5576	-14.8675	-14.8301	-15.3086	-15.2515	-15.2422	-14.7978	-14.7452	-14.8898	-14.7316	-15.269	-14.8138	0.0295177	0.045396	0.00263247	0.00798492	0.537376	0.455187	1.45133	1.37096
b0758	galT	chr	-	789205,	790252,	-13.0023	-12.9519	-12.9421	-13.5508	-13.5302	-13.331	-12.647	-12.7452	-12.7227	-12.968	-13.5055	-12.7023	0.0139451	0.025707	0.00325574	0.00895738	0.537517	0.803245	1.45147	1.74502
b1708	nlpC	chr	-	1790290,	1790755,	-14.1878	-14.4578	-14.3802	-14.924	-14.8521	-14.8164	-14.2767	-14.2012	-14.3077	-14.3279	-14.8703	-14.2648	0.0133791	0.0250857	0.000176107	0.00160697	0.542385	0.605528	1.45638	1.52154
b3884	yihW	chr	+	4072691,	4073477,	-14.8032	-14.7545	-14.6955	-15.37	-15.3022	-15.2639	-15.0855	-14.9769	-15.1009	-14.7555	-15.3187	-15.0579	0.000217523	0.00214583	0.00760481	0.016328	0.563153	0.26073	1.47749	1.19808
b2795	ygdH	chr	+	2924329,	2925694,	-12.7378	-12.6582	-12.7029	-13.2667	-13.3086	-13.1739	-12.8688	-12.8792	-12.8877	-12.7009	-13.2739	-12.8786	0.000912882	0.00464933	0.0102334	0.020523	0.57294	0.395295	1.48755	1.31521
b2696	csrA	chr	-	2816982,	2817168,	-11.7752	-11.8319	-11.8276	-12.4233	-12.3563	-12.3835	-11.7626	-11.7592	-11.776	-11.8088	-12.3824	-11.7663	2.80099e-05	0.000807128	0.000490855	0.0030539	0.57358	0.616075	1.48821	1.5327
b1067	yceH	chr	+	1125379,	1126027,	-13.6035	-13.5956	-13.5195	-14.2071	-14.1612	-14.0045	-13.5894	-13.6815	-13.6183	-13.5764	-14.1517	-13.6264	0.00522166	0.0129954	0.00684142	0.0151456	0.57538	0.525373	1.49007	1.43931
b0030	rihC	chr	+	27292,	28207,	-11.9598	-11.9068	-11.9405	-12.4842	-12.5713	-12.4379	-11.5063	-11.5086	-11.5292	-11.9365	-12.5215	-11.5151	0.00177965	0.0069597	0.00115221	0.0049397	0.584999	1.00638	1.50004	2.00887
b4322	uxuA	chr	+	4549658,	4550843,	-12.8624	-12.8168	-12.7459	-13.4397	-13.4143	-13.2639	-12.3346	-12.3739	-12.3438	-12.8131	-13.3992	-12.3494	0.00206576	0.00750049	0.0019843	0.00658427	0.58614	1.04986	1.50122	2.07033
b1923	fliC	chr	-	2000133,	2001630,	-15.0776	-15.0905	-15.0565	-15.7371	-15.6419	-15.6078	-15.4325	-15.3348	-15.4963	-15.0758	-15.6678	-15.4249	0.00271801	0.00887554	0.0178339	0.0310462	0.592018	0.242917	1.50735	1.18338
b0651	rihA	chr	-	682699,	683635,	-12.3146	-12.3994	-12.3174	-13.0212	-12.9037	-12.882	-11.939	-11.8402	-11.8634	-12.3431	-12.9386	-11.8823	0.000752598	0.0041621	8.72801e-05	0.00112767	0.595518	1.05626	1.51101	2.07954
b0435	bolA	chr	+	453695,	454013,	-13.7251	-13.7398	-13.8402	-14.4018	-14.3447	-14.3196	-13.6655	-13.6859	-13.5028	-13.7621	-14.3597	-13.6113	0.000385923	0.00287473	0.0022115	0.00704727	0.597587	0.74842	1.51318	1.67995
b1198	dhaM	chr	-	1246918,	1248340,	-11.7683	-11.7665	-11.7928	-12.3288	-12.4345	-12.2639	-10.9599	-10.9345	-10.9447	-11.7747	-12.3723	-10.947	0.00638108	0.0147411	0.00102371	0.00460002	0.597632	1.42533	1.51323	2.68576
b4216	ytfJ	chr	-	4436730,	4437285,	-13.7208	-13.7929	-13.7346	-14.3137	-14.3953	-14.2971	-13.5239	-13.3956	-13.36	-13.7484	-14.3528	-13.426	0.000177468	0.00198336	0.00032864	0.0023675	0.604369	0.926776	1.52031	1.90102
b2239	glpQ	chr	-	2347956,	2349033,	-9.3954	-9.39368	-9.39895	-10.0179	-10.0498	-9.85861	-8.35278	-8.34372	-8.33896	-9.39584	-10.0093	-8.34518	0.0102177	0.0204916	0.00125519	0.00518546	0.613414	1.66408	1.52987	3.16911
b4153	frdB	chr	-	4377805,	4378540,	-12.3824	-12.3942	-12.4435	-13.046	-12.9919	-13.0415	-12.0021	-11.9552	-11.9812	-12.4036	-13.0171	-11.9807	1.78824e-05	0.000691055	2.16359e-06	0.000182241	0.613465	1.03636	1.52993	2.05105
b2494	yfgC	chr	+	2614115,	2615579,	-13.8439	-13.8358	-13.818	-14.3805	-14.4985	-14.4628	-14.243	-14.2598	-14.2907	-13.8338	-14.4528	-14.2648	0.00222297	0.00792195	0.0225389	0.0371689	0.619013	0.188022	1.53582	1.1392
b1583	ynfB	chr	+	1653831,	1654173,	-13.0794	-13.0989	-13.0959	-13.6648	-13.7498	-13.6862	-13.4613	-13.4899	-13.4547	-13.0906	-13.7114	-13.4673	0.00106482	0.00506606	0.00528684	0.0124497	0.620817	0.244104	1.53775	1.18436
b4351	mrr	chr	+	4584971,	4585886,	-13.7364	-13.6713	-13.6415	-14.2987	-14.3513	-14.2102	-13.5138	-13.6247	-13.4737	-13.687	-14.3119	-13.531	0.000532993	0.00351583	0.000266711	0.0020722	0.624936	0.780972	1.54214	1.71829
b3430	glgC	chr	-	3566055,	3567351,	-13.6793	-13.7187	-13.7421	-14.2838	-14.3884	-14.2749	-13.6507	-13.6119	-13.5903	-13.7102	-14.3356	-13.6175	0.000736885	0.00413789	0.000527707	0.00315697	0.62543	0.718076	1.54267	1.64499
b3124	garK	chr	-	3268646,	3269792,	-15.6861	-15.5809	-15.5724	-16.4342	-16.2026	-16.0229	-14.5649	-14.6376	-14.8069	-15.6176	-16.2463	-14.6687	0.0278383	0.0434231	0.00101318	0.00460002	0.628741	1.57764	1.54621	2.98482
b0163	yaeH	chr	-	183708,	184095,	-13.1168	-13.0265	-13.0887	-13.7371	-13.7302	-13.6078	-13.2542	-13.3631	-13.3336	-13.0782	-13.7136	-13.3138	0.000616736	0.0038154	0.00266069	0.00802605	0.635424	0.399793	1.55339	1.31932
b3766	ilvL	chr	+	3948344,	3948443,	-14.8827	-14.9709	-15.0056	-15.7371	-15.5626	-15.3775	-14.2938	-14.392	-14.5492	-14.9463	-15.5885	-14.4096	0.0189258	0.0320306	0.00132272	0.00526113	0.642178	1.17887	1.56068	2.264
b3233	yhcB	chr	+	3378212,	3378611,	-11.7229	-11.7325	-11.7224	-12.374	-12.4257	-12.1739	-11.5122	-11.4486	-11.5267	-11.7259	-12.3684	-11.4982	0.0159238	0.0281142	0.00493892	0.0119914	0.642445	0.870185	1.56097	1.8279
b0002	thrA	chr	+	336,	2799,	-12.7847	-12.8945	-12.7913	-13.63	-13.3936	-13.3894	-12.948	-13.2498	-13.0192	-12.8223	-13.4677	-13.0571	0.00659103	0.0150358	0.0308396	0.0474955	0.645414	0.410592	1.56419	1.32923
b4488	ilvG	chr	+	3948582,	3950227,	-12.9242	-12.9786	-12.895	-13.6237	-13.5473	-13.6936	-12.8666	-12.7901	-12.7809	-12.9335	-13.5935	-12.8131	0.000538074	0.00352809	0.000243422	0.00195241	0.660035	0.780483	1.58012	1.71771
b0721	sdhC	chr	+	754399,	754789,	-12.1354	-12.1795	-12.1898	-12.8768	-12.7719	-12.9954	-11.6498	-11.7119	-11.655	-12.1654	-12.8379	-11.6697	0.00550648	0.013409	0.00136788	0.00527599	0.672498	1.16826	1.59383	2.2474
b3001	yghZ	chr	+	3145918,	3146959,	-13.3009	-13.2719	-13.4236	-14.0777	-14.0651	-13.8084	-12.9916	-13.0555	-13.0984	-13.3251	-14.0281	-13.0477	0.00689786	0.0153832	0.00443661	0.0110663	0.703014	0.980347	1.6279	1.97294
b4206	ytfB	chr	-	4426101,	4426740,	-13.6793	-13.6375	-13.7555	-14.3339	-14.4585	-14.3083	-13.8731	-13.7829	-13.7988	-13.6865	-14.393	-13.8195	0.000471873	0.00322938	0.00139338	0.00531622	0.70654	0.573467	1.63189	1.4881
b2289	lrhA	chr	-	2403724,	2404663,	-13.6389	-13.5606	-13.5523	-14.2887	-14.2862	-14.3425	-13.8433	-13.7359	-13.8644	-13.5875	-14.2953	-13.8181	7.58374e-05	0.00123943	0.00202566	0.00667769	0.707723	0.477152	1.63322	1.39199
b1415	aldA	chr	+	1486255,	1487695,	-12.5377	-12.6217	-12.6291	-13.2474	-13.3463	-13.2749	-10.9045	-10.8634	-10.8681	-12.5912	-13.3019	-10.8793	7.58169e-05	0.00123943	1.24383e-05	0.000453997	0.710708	2.42259	1.63661	5.36132
b3770	ilvE	chr	+	3950506,	3951436,	-14.4938	-14.4822	-14.481	-15.2887	-15.1729	-15.1185	-14.6	-14.4744	-14.5765	-14.4863	-15.2021	-14.5536	0.00477026	0.0125809	0.00072993	0.00375444	0.715872	0.64852	1.64248	1.56756
b2369	evgA	chr	+	2481776,	2482391,	-13.7958	-13.6901	-13.8422	-14.4562	-14.4911	-14.5804	-14.1569	-14.314	-14.3365	-13.7726	-14.4922	-14.2648	0.000284429	0.00239577	0.0302651	0.0468082	0.719571	0.227396	1.64669	1.17072
b2259	pmrD	chr	-	2371293,	2371560,	-15.0281	-15.1157	-14.8876	-15.6584	-15.7608	-15.8488	-14.7497	-15.0213	-15.091	-15.0142	-15.7382	-14.9432	0.00114578	0.00524949	0.00623238	0.0141001	0.724036	0.794958	1.6518	1.73503
b1225	narH	chr	+	1282826,	1284365,	-13.1657	-13.1707	-13.1452	-13.8419	-13.988	-13.6644	-13.2128	-13.4667	-13.2992	-13.1614	-13.8865	-13.3148	0.0183287	0.0312248	0.014894	0.026736	0.725012	0.571611	1.65291	1.48618
b2568	lepB	chr	-	2702356,	2703331,	-12.6107	-12.5307	-12.5817	-13.3212	-13.3884	-13.0462	-11.4152	-11.3856	-11.5492	-12.5754	-13.3103	-11.4524	0.0190301	0.0320584	0.000730316	0.00375444	0.734871	1.85789	1.66425	3.62477
b3752	rbsK	chr	+	3935316,	3936246,	-12.987	-12.9201	-12.9718	-13.7237	-13.698	-13.6572	-12.9869	-12.9392	-12.931	-12.9601	-13.7004	-12.9527	1.2844e-05	0.000676843	1.00296e-05	0.000400234	0.740273	0.747656	1.67049	1.67906
b3599	mtlA	chr	+	3770303,	3772217,	-12.7906	-12.8774	-12.8311	-13.5478	-13.5684	-13.6359	-13.0608	-13.1727	-13.0428	-12.8306	-13.5713	-13.0863	3.39573e-05	0.000857533	0.00110197	0.00480738	0.740678	0.484937	1.67096	1.39952
b1251	yciI	chr	-	1308592,	1308889,	-13.718	-13.7043	-13.7029	-14.4125	-14.5171	-14.3425	-13.7937	-13.966	-13.7948	-13.7091	-14.4546	-13.8429	0.00468188	0.0124429	0.00180456	0.00627378	0.745526	0.611782	1.67659	1.52815
b0782	moaB	chr	+	817277,	817790,	-12.3242	-12.3904	-12.4297	-13.0884	-13.1251	-13.1945	-12.8795	-12.9154	-12.8561	-12.3758	-13.1228	-12.8816	6.65427e-05	0.00117774	0.00504032	0.0121173	0.74698	0.241176	1.67828	1.18196
b3487	yhiI	chr	-	3627557,	3628625,	-13.3178	-13.4713	-13.2874	-14.1166	-14.1322	-13.9954	-13.6107	-13.6815	-13.775	-13.358	-14.1059	-13.6884	0.000760647	0.00418547	0.00375589	0.00988162	0.747952	0.417564	1.67941	1.33567
b3670	ilvN	chr	-	3848824,	3849115,	-14.1104	-14.076	-14.0354	-14.9787	-14.8103	-14.6359	-13.4775	-13.6119	-13.6686	-14.0772	-14.8361	-13.5828	0.0143623	0.0262113	0.00132585	0.00526113	0.758964	1.25335	1.69228	2.38395
b3983	rplK	chr	+	4176469,	4176898,	-7.14883	-7.16355	-7.20523	-7.96097	-7.96252	-7.80321	-7.33188	-7.32937	-7.35356	-7.16969	-7.93722	-7.33881	0.00263004	0.00878017	0.00747843	0.0160882	0.767524	0.598414	1.70235	1.51405
b0876	ybjD	chr	+	915695,	917354,	-14.1609	-14.2439	-14.1044	-14.924	-14.905	-15.1998	-14.484	-14.6376	-14.6112	-14.1713	-14.9516	-14.573	0.00569581	0.0136774	0.0281023	0.0438974	0.780327	0.378612	1.71752	1.30009
b3771	ilvD	chr	+	3951500,	3953351,	-14.9113	-15.0576	-15.0378	-15.7237	-15.8521	-15.6644	-15.471	-15.2531	-15.2573	-14.9946	-15.7794	-15.3271	0.00058547	0.00372318	0.0114534	0.0221582	0.784733	0.452239	1.72277	1.36816
b1180	ycgM	chr	+	1227301,	1227961,	-13.9421	-13.8202	-13.8939	-14.652	-14.6875	-14.7084	-14.5239	-14.6035	-14.5358	-13.8868	-14.6786	-14.5512	0.00037466	0.00280995	0.0169383	0.0296284	0.791754	0.127361	1.73118	1.09229
b4035	malK	chr	+	4244806,	4245922,	-13.2192	-13.2018	-13.2654	-13.8749	-14.1351	-13.9863	-11.8465	-11.8831	-11.8813	-13.2264	-14.0212	-11.8696	0.00666411	0.0151394	0.000983011	0.00452679	0.794781	2.15165	1.73481	4.44337
b2150	mglB	chr	-	2237371,	2238370,	-10.9294	-10.9408	-10.9218	-11.7112	-11.7542	-11.7177	-8.68454	-8.68301	-8.66831	-10.931	-11.7343	-8.6783	3.80844e-05	0.000857533	1.47589e-06	0.00016161	0.803232	3.05596	1.74501	8.31642
b0119	yacL	chr	+	134387,	134750,	-14.1976	-14.1806	-14.1044	-15.0863	-14.9649	-14.7537	-14.1832	-14.392	-14.23	-14.1647	-14.97	-14.2589	0.0104543	0.0208515	0.00712832	0.0155179	0.805305	0.711132	1.74752	1.63709
b4529	ydbJ	chr	+	1439081,	1439348,	-14.0491	-13.9481	-13.9942	-14.8275	-14.7608	-14.916	-14.4074	-14.2866	-14.4452	-13.9992	-14.8051	-14.3837	0.000260026	0.00231486	0.00230419	0.00727114	0.80594	0.421398	1.74828	1.33922
b3157	yhbT	chr	-	3298773,	3299298,	-13.0351	-12.9931	-12.9685	-13.9278	-13.7564	-13.8084	-13.5239	-13.5867	-13.6042	-13.0018	-13.8193	-13.5706	0.00134464	0.00579677	0.0210994	0.0351657	0.817579	0.24878	1.76245	1.1882
b2243	glpC	chr	+	2353542,	2354733,	-12.6766	-12.7349	-12.6432	-13.4369	-13.5511	-13.5335	-11.3547	-11.4048	-11.3808	-12.686	-13.5094	-11.3786	8.4848e-05	0.0012904	3.93355e-05	0.000775286	0.823427	2.13075	1.7696	4.37944
b0391	yaiE	chr	+	407400,	407685,	-14.2863	-14.2051	-14.1241	-15.0356	-15.0381	-15.0415	-14.2824	-14.2934	-14.3423	-14.2113	-15.0378	-14.3067	0.00311019	0.00951301	0.000575171	0.00326328	0.826447	0.731048	1.77331	1.65984
b4138	dcuA	chr	-	4363494,	4364796,	-9.7958	-9.77881	-9.7934	-10.672	-10.6442	-10.5915	-10.0001	-9.97353	-9.98806	-9.78944	-10.6454	-9.98793	0.000458325	0.00321709	0.000505269	0.00310825	0.855999	0.657515	1.81001	1.57736
b2149	mglA	chr	-	2235790,	2237311,	-14.074	-13.9557	-13.963	-14.8419	-14.8952	-14.7847	-11.9719	-11.9715	-11.9342	-14.0018	-14.8605	-11.9583	8.94914e-05	0.00132423	1.55203e-05	0.000494182	0.858698	2.90217	1.8134	7.47552
b1777	yeaC	chr	-	1859725,	1859998,	-13.5023	-13.5209	-13.5962	-14.4452	-14.3714	-14.4503	-13.8349	-13.7313	-13.8436	-13.5348	-14.4073	-13.8066	2.38319e-05	0.000742825	0.000286853	0.00216624	0.872443	0.600686	1.83076	1.51644
b0677	nagA	chr	-	700825,	701974,	-12.0817	-12.0475	-12.0577	-12.9847	-12.9802	-12.8778	-12.6397	-12.5517	-12.6613	-12.0634	-12.966	-12.6207	0.000731721	0.00413789	0.00243315	0.0076066	0.902694	0.345367	1.86955	1.27047
b3655	yicH	chr	+	3828479,	3830189,	-14.2074	-14.3053	-14.102	-15.2024	-15.0542	-15.1585	-14.6655	-14.6119	-14.3718	-14.2076	-15.1176	-14.5393	0.000341266	0.00270787	0.0109003	0.0215061	0.910055	0.578342	1.87912	1.49313
b1199	dhaL	chr	-	1248347,	1248980,	-12.6841	-12.6127	-12.63	-13.5929	-13.5958	-13.4256	-11.3966	-11.4581	-11.3846	-12.6445	-13.5683	-11.4101	0.00145186	0.00597663	0.000134913	0.00136786	0.923768	2.15815	1.89706	4.46342
b0958	sulA	chr	-	1019632,	1020142,	-13.6834	-13.7268	-13.8021	-14.6584	-14.6833	-14.6359	-14.2265	-14.2269	-14.302	-13.7311	-14.6678	-14.253	0.00036367	0.00276541	0.000637342	0.00346311	0.93676	0.414796	1.91422	1.33311
b4411	ecnB	chr	+	4374575,	4374722,	-15.1363	-15.1806	-15.2915	-16.0356	-16.2269	-16.0988	-15.7897	-15.6638	-15.7361	-15.1941	-16.1413	-15.7326	0.000283203	0.00239577	0.00688282	0.0151949	0.94714	0.408668	1.92805	1.32746
b3671	ilvB	chr	-	3849118,	3850807,	-12.5887	-12.6605	-12.5979	-13.6206	-13.5879	-13.4074	-12.6507	-12.8094	-12.7342	-12.6149	-13.5703	-12.7258	0.00243227	0.00829701	0.000988191	0.00452748	0.955411	0.844473	1.93913	1.79561
b0111	ampE	chr	+	119280,	120135,	-14.3566	-14.4578	-14.4191	-15.5128	-15.2269	-15.5804	-14.9167	-15.0326	-14.8644	-14.4075	-15.3666	-14.9307	0.00743339	0.0161814	0.0278522	0.0436311	0.959134	0.435945	1.94414	1.3528
b0064	araC	chr	+	70386,	71265,	-14.6349	-14.7059	-14.5826	-15.6457	-15.6177	-15.5009	-15.0756	-15.0555	-15.1927	-14.6427	-15.6089	-15.11	0.000103571	0.00149225	0.00146837	0.00548761	0.966185	0.498897	1.95367	1.41313
b3125	garR	chr	-	3269888,	3270773,	-12.2878	-12.3352	-12.2943	-13.2378	-13.2703	-13.4074	-11.7616	-11.6704	-11.7448	-12.3053	-13.2788	-11.7282	0.00142146	0.00596551	9.66937e-05	0.00112767	0.973494	1.55059	1.96359	2.92937
b3995	rsd	chr	-	4194354,	4194831,	-15.6698	-15.5237	-15.7214	-16.7781	-16.5397	-16.5009	-16.1569	-16.0906	-16.1208	-15.6336	-16.6089	-16.1242	0.00135364	0.00580248	0.0260662	0.0416071	0.975281	0.484683	1.96602	1.39928
b4152	frdC	chr	-	4377399,	4377795,	-13.2054	-13.0947	-13.2357	-14.1166	-14.2392	-14.0509	-13.1335	-13.3071	-13.2219	-13.176	-14.1683	-13.2145	0.000236139	0.00220282	0.000266831	0.0020722	0.992307	0.953855	1.98936	1.93704
b4240	treB	chr	-	4462781,	4464203,	-7.43567	-7.42635	-7.42939	-8.45612	-8.44842	-8.37957	-7.54846	-7.53827	-7.54471	-7.43077	-8.44054	-7.54411	0.000515559	0.00342144	0.000644688	0.00346311	1.00977	0.896423	2.01359	1.86145
b1594	dgsA	chr	-	1665367,	1666588,	-15.3285	-15.103	-15.0193	-16.2887	-16.1095	-16.2639	-15.6215	-15.3209	-15.4081	-15.1589	-16.1898	-15.4515	0.00144681	0.00597663	0.0035522	0.00952136	1.03086	0.738235	2.04325	1.66813
b1256	ompW	chr	+	1312043,	1312682,	-11.1762	-11.1271	-11.209	-12.2667	-12.1855	-12.179	-11.8193	-11.7452	-11.8457	-11.1689	-12.2111	-11.8062	1.21525e-05	0.000676843	0.000603715	0.00335568	1.04221	0.404875	2.05938	1.32397
b2997	hybO	chr	-	3143164,	3144283,	-13.0633	-13.0087	-13.001	-13.9629	-14.1966	-13.9954	-13.423	-13.4783	-13.5358	-13.027	-14.0843	-13.4787	0.00310846	0.00951301	0.00734695	0.015891	1.05727	0.605616	2.08099	1.52163
b4055	aphA	chr	+	4267436,	4268150,	-12.1638	-12.1408	-12.2278	-13.3036	-13.2578	-13.1037	-12.1361	-12.2598	-12.2192	-12.174	-13.2488	-12.2012	0.000932133	0.00468622	0.000444158	0.00287608	1.07473	1.04751	2.10633	2.06696
b1127	pepT	chr	+	1185066,	1186293,	-13.182	-13.1872	-13.1515	-14.2838	-14.264	-14.1484	-13.7457	-13.6205	-13.92	-13.1749	-14.2528	-13.7656	0.000850308	0.00445492	0.0179883	0.0310681	1.07784	0.487136	2.11087	1.40166
b0679	nagE	chr	+	703166,	705113,	-10.4908	-10.4764	-10.4891	-11.5914	-11.5825	-11.5889	-10.6179	-10.593	-10.6161	-10.4855	-11.5864	-10.6099	1.00761e-07	7.55943e-05	1.35058e-05	0.000477058	1.10089	0.976561	2.14486	1.96777
b1902	ftnB	chr	+	1984948,	1985452,	-15.0351	-14.9257	-15.129	-16.4562	-15.9906	-16.0988	-15.6507	-15.4822	-15.302	-15.0234	-16.1472	-15.4696	0.00705639	0.0156412	0.0185961	0.0319185	1.12386	0.677676	2.1793	1.59956
b4238	nrdD	chr	-	4458544,	4460683,	-11.1576	-11.137	-11.1661	-12.348	-12.3038	-12.1484	-11.8838	-11.8703	-11.9342	-11.1531	-12.294	-11.8975	0.0025027	0.00845821	0.017984	0.0310681	1.1409	0.396502	2.20519	1.31631
b0791	ybhQ	chr	+	823852,	824263,	-14.3544	-14.4026	-14.3452	-15.4233	-15.6017	-15.4256	-14.9167	-15.0326	-14.9869	-14.3676	-15.5132	-14.9751	0.00138256	0.00586784	0.0041473	0.0105858	1.14565	0.538143	2.21246	1.4521
b1200	dhaK	chr	-	1248990,	1250061,	-11.8997	-11.9359	-12.0349	-13.1101	-13.2284	-12.9203	-10.8822	-10.8125	-10.8618	-11.9494	-13.139	-10.8541	0.00201311	0.00749091	0.000996432	0.00454622	1.18962	2.28492	2.28093	4.87337
b4154	frdA	chr	-	4378532,	4380341,	-10.6659	-10.64	-10.6494	-11.8204	-11.8652	-11.8346	-11.0204	-10.999	-11.0661	-10.6525	-11.8455	-11.0301	2.47753e-06	0.000326094	1.57958e-05	0.000494182	1.19298	0.815441	2.28625	1.75984
b3603	lldP	chr	+	3775421,	3777077,	-13.6231	-13.5839	-13.6309	-14.7921	-14.8521	-14.7084	-12.4516	-12.4196	-12.5176	-13.6121	-14.8098	-12.465	0.0004154	0.00303242	4.64222e-06	0.000232895	1.19769	2.3448	2.29373	5.07989
b3707	tnaC	chr	+	3886457,	3886532,	-11.2435	-11.1995	-11.2908	-12.4984	-12.5359	-12.0771	-10.5353	-10.6109	-10.6343	-11.242	-12.4459	-10.5922	0.0143896	0.0262173	0.00524677	0.0123819	1.20389	1.85372	2.3036	3.61431
b1474	fdnG	chr	+	1545424,	1548472,	-12.1614	-12.1279	-12.193	-13.3441	-13.4549	-13.205	-12.9639	-13.0613	-12.9984	-12.1591	-13.378	-13.0044	0.00230715	0.00804564	0.0321997	0.049333	1.21893	0.373643	2.32774	1.29562
b0828	iaaA	chr	+	865790,	866756,	-15.0921	-14.9	-15.144	-16.2306	-16.3151	-16.2208	-16.0366	-16.0906	-16.0428	-15.0393	-16.2722	-16.0545	0.00123924	0.00551682	0.00881591	0.018214	1.23292	0.217701	2.35043	1.16288
b1621	malX	chr	+	1697378,	1698971,	-13.9225	-13.8376	-13.9045	-15.184	-15.138	-15.0603	-13.9662	-14.1265	-14.0861	-13.8886	-15.1413	-14.0545	2.2964e-05	0.000742825	0.000101044	0.00114065	1.25263	1.08674	2.38276	2.12394
b2242	glpB	chr	+	2352286,	2353546,	-11.804	-11.787	-11.7738	-13.0377	-13.1067	-12.8488	-11.0725	-11.1517	-11.1233	-11.7896	-13.0426	-11.1136	0.00367076	0.0106617	0.000757702	0.003859	1.253	1.92906	2.38337	3.80808
b2799	fucO	chr	-	2929886,	2931038,	-14.8333	-14.9183	-14.7252	-16.2118	-16.0872	-15.8488	-14.7262	-14.6815	-14.6042	-14.8286	-16.0886	-14.6687	0.00195352	0.0073762	0.00296013	0.0084852	1.26	1.41988	2.39495	2.67564
b4409	blr	chr	+	1702574,	1702700,	-14.004	-13.9882	-13.9066	-15.1123	-15.2766	-15.4014	-14.9525	-14.999	-14.7671	-13.9702	-15.2368	-14.8967	0.00171895	0.00679512	0.0324077	0.0495621	1.26651	0.340012	2.40579	1.26577
b0607	uspG	chr	-	640661,	641090,	-12.2212	-12.1973	-12.2763	-13.4397	-13.5302	-13.5736	-12.6378	-12.6859	-12.6271	-12.2287	-13.5055	-12.648	5.46636e-05	0.00106887	0.000417769	0.00278937	1.27683	0.85752	2.42306	1.81192
b3927	glpF	chr	-	4115267,	4116113,	-9.81826	-9.79619	-9.81754	-11.0655	-11.1315	-11.0022	-10.003	-10.0192	-9.95866	-9.81068	-11.0895	-9.99179	0.000599365	0.00375031	0.000164182	0.00154809	1.2788	1.09769	2.42638	2.14012
b2535	csiE	chr	+	2663456,	2664737,	-14.6139	-14.5293	-14.6557	-15.8204	-15.9099	-15.9507	-14.8391	-14.8217	-14.9244	-14.5968	-15.8852	-14.8636	1.75312e-05	0.000691055	4.25329e-05	0.000775286	1.28837	1.02162	2.44252	2.0302
b1223	narK	chr	+	1277179,	1278571,	-11.214	-11.2077	-11.2461	-12.6082	-12.4666	-12.4691	-12.1766	-12.2799	-12.0861	-11.221	-12.5128	-12.1728	0.000714346	0.00413789	0.0109891	0.0215698	1.29173	0.339947	2.44821	1.26571
b2426	ucpA	chr	-	2541853,	2542645,	-12.0425	-11.9935	-12.0073	-13.4314	-13.3184	-13.3196	-11.7166	-11.7233	-11.7701	-12.016	-13.3554	-11.7374	0.000174398	0.00198336	6.73366e-05	0.000983114	1.33939	1.61799	2.53044	3.06947
b2240	glpT	chr	-	2349037,	2350396,	-8.00327	-8.00015	-8.01197	-9.38979	-9.40584	-9.3665	-7.91086	-7.87906	-7.89577	-8.00472	-9.39457	-7.89606	1.61234e-05	0.000691055	1.04477e-07	2.28804e-05	1.38985	1.49851	2.62052	2.82551
b3087	ygjR	chr	+	3235332,	3236319,	-13.992	-13.9481	-14.1515	-15.4452	-15.4091	-15.4256	-14.2767	-14.2012	-14.402	-14.0207	-15.4235	-14.2966	0.00152282	0.00619886	0.0020555	0.00670023	1.40277	1.12689	2.64408	2.18387
b3224	nanT	chr	-	3369105,	3370596,	-13.0579	-13.0771	-13.0719	-14.4452	-14.4911	-14.5009	-11.7645	-11.7487	-11.7189	-13.0683	-14.477	-11.7435	3.38186e-05	0.000857533	5.72535e-08	2.08975e-05	1.40876	2.73352	2.65509	6.65076
b4139	aspA	chr	-	4364913,	4366350,	-8.79502	-8.78753	-8.83178	-10.3008	-10.2856	-10.0723	-9.52603	-9.54029	-9.5354	-8.80294	-10.2568	-9.53355	0.00205218	0.00750049	0.0111859	0.0217559	1.45386	0.72325	2.73941	1.6509
b3685	yidE	chr	-	3862634,	3864296,	-13.6376	-13.662	-13.6882	-15.1298	-15.0816	-15.2859	-14.484	-14.5619	-14.5972	-13.6601	-15.1264	-14.5464	0.0010167	0.00492607	0.00276603	0.0081639	1.46637	0.580006	2.76325	1.49486
b2292	yfbS	chr	-	2407541,	2409374,	-14.9274	-14.8891	-14.8463	-16.2306	-16.4091	-16.5009	-15.6215	-15.6638	-15.8984	-14.891	-16.3597	-15.7272	0.00143217	0.00596551	0.0051879	0.012296	1.46865	0.632526	2.76763	1.55028
b3365	nirB	chr	+	3492032,	3494576,	-11.095	-11.0392	-11.0716	-12.5113	-12.6227	-12.4014	-12.1595	-12.1295	-12.1397	-11.0696	-12.5504	-12.1436	0.00112657	0.00520504	0.0268357	0.0424288	1.48079	0.406796	2.79102	1.32574
b0598	cstA	chr	+	629116,	631222,	-14.2759	-14.1939	-14.2371	-15.6972	-15.9001	-15.5009	-14.4645	-14.2799	-14.4327	-14.2371	-15.7655	-14.3966	0.00468085	0.0124429	0.00226499	0.00718887	1.5284	1.36892	2.88467	2.58278
b2964	nupG	chr	+	3103735,	3104992,	-11.6307	-11.6064	-11.6204	-13.2426	-13.1936	-12.942	-12.4532	-12.4289	-12.3853	-11.6196	-13.1691	-12.4216	0.00363732	0.010629	0.0139558	0.02577	1.5495	0.747506	2.92716	1.67889
b3774	ilvC	chr	+	3955992,	3957468,	-13.6671	-13.6149	-13.6973	-15.2306	-15.2453	-15.1585	-13.7146	-13.8365	-13.7671	-13.658	-15.2272	-13.7684	1.96911e-06	0.000323462	1.02343e-05	0.000400234	1.56922	1.45881	2.96744	2.74882
b3672	ivbL	chr	-	3850912,	3851011,	-13.8017	-13.7744	-13.7158	-15.4673	-15.3216	-15.2859	-14.1207	-14.2465	-14.3077	-13.7676	-15.3632	-14.2221	0.000198194	0.0020432	0.0001316	0.00135507	1.59554	1.14105	3.02208	2.20541
b1824	yobF	chr	-	1905471,	1905615,	-14.1104	-14.1586	-13.9763	-15.6712	-15.7345	-15.6078	-15.0855	-15.0441	-15.2573	-14.0861	-15.6938	-15.1314	5.11185e-05	0.00103657	0.00462937	0.0114687	1.60771	0.562412	3.04768	1.47674
b3528	dctA	chr	-	3680183,	3681470,	-11.1108	-11.1437	-11.1607	-12.8311	-12.7323	-12.6899	-11.2265	-11.1996	-11.2683	-11.1359	-12.7581	-11.2331	0.000189015	0.00201356	8.76468e-05	0.00112767	1.62218	1.52492	3.07839	2.8777
b3709	tnaB	chr	+	3888258,	3889506,	-15.6376	-15.7545	-15.513	-17.6712	-17.1553	-17.0603	-13.7897	-13.7406	-13.6183	-15.6377	-17.2919	-13.7123	0.00689727	0.0153832	0.00159156	0.0058482	1.65427	3.57962	3.14764	11.9556
b1376	uspF	chr	-	1433208,	1433643,	-12.9997	-13.0536	-13.0755	-14.8132	-14.8241	-14.4379	-13.7816	-13.4783	-13.6871	-13.039	-14.7563	-13.6532	0.00478124	0.0125809	0.00372487	0.00982827	1.71738	1.10319	3.28839	2.14828
b4321	gntP	chr	-	4547975,	4549319,	-13.6985	-13.6948	-13.8041	-15.6457	-15.264	-15.7537	-14.5105	-14.414	-14.3898	-13.7267	-15.4491	-14.4381	0.00458202	0.0123275	0.0131947	0.0248392	1.72236	1.01095	3.29975	2.01524
b0880	cspD	chr	-	921588,	921813,	-11.6081	-11.6001	-11.5699	-13.4984	-13.397	-12.9954	-12.3406	-12.4534	-12.3823	-11.5944	-13.3614	-12.388	0.00775106	0.0165447	0.0234892	0.038389	1.76704	0.973441	3.40356	1.96352
b0162	cdaR	chr	+	182462,	183620,	-14.7166	-14.7284	-14.6135	-16.6457	-16.4802	-16.179	-15.484	-15.4978	-15.6468	-14.6901	-16.4827	-15.544	0.00384859	0.0109176	0.0136312	0.0252986	1.79256	0.938659	3.46429	1.91675
b2365	dsdX	chr	+	2475868,	2477206,	-15.5551	-15.5986	-15.5724	-16.9867	-17.5246	-18.1384	-14.271	-14.2334	-14.2963	-15.5744	-17.3877	-14.2687	0.0270896	0.0424973	0.00994403	0.0200899	1.81328	3.11899	3.51441	8.68776
b2241	glpA	chr	+	2350668,	2352297,	-10.6834	-10.633	-10.6741	-12.52	-12.5781	-12.3775	-11.3105	-11.3105	-11.3113	-10.6638	-12.5273	-11.3108	0.000547692	0.00353351	0.00253542	0.00783598	1.86349	1.21652	3.63887	2.32385
b2151	galS	chr	-	2238649,	2239690,	-15.0633	-15.1586	-15.1044	-17.0191	-16.9598	-16.916	-15.7108	-16.1144	-16.0053	-15.1062	-16.9727	-15.9245	1.48044e-06	0.000323462	0.0101603	0.0204513	1.86644	1.0482	3.64632	2.06795
b1725	yniA	chr	+	1805819,	1806680,	-14.8182	-14.5839	-14.5894	-16.4786	-16.6833	-16.6078	-15.1886	-15.3775	-15.4081	-14.6704	-16.6007	-15.3189	6.1359e-05	0.00113878	0.000174479	0.0016055	1.93033	1.28178	3.81142	2.43138
b3107	yhaL	chr	+	3253064,	3253229,	-15.3631	-15.4578	-15.6557	-17.2691	-17.6501	-17.2208	-16.4325	-16.214	-16.4578	-15.4736	-17.4454	-16.3731	0.000733343	0.00413789	0.00626714	0.0141495	1.97182	1.07236	3.92263	2.10288
b1224	narG	chr	+	1279086,	1282830,	-10.586	-10.5435	-10.5649	-12.6144	-12.6197	-12.3894	-11.7428	-11.7973	-11.8019	-10.5657	-12.5814	-11.7796	0.00115262	0.00525881	0.00699032	0.0152783	2.01567	0.801728	4.0437	1.74319
b2597	raiA	chr	+	2735175,	2735517,	-10.114	-10.0931	-10.1418	-12.2618	-12.2072	-11.9999	-9.78232	-9.80186	-9.77673	-10.1149	-12.1921	-9.78606	0.00114331	0.00524949	0.00103343	0.00460002	2.07718	2.40602	4.21981	5.30009
b3128	garD	chr	+	3273303,	3274875,	-13.9853	-13.9824	-13.9785	-16.4786	-16.2147	-15.882	-13.8183	-13.9499	-13.7593	-13.9824	-16.2399	-13.8341	0.00604033	0.0142202	0.00271047	0.00812615	2.25757	2.40587	4.78184	5.29955
b1205	ychH	chr	+	1258013,	1258292,	-12.6985	-12.6383	-12.6048	-15.2306	-15.4802	-14.916	-13.027	-12.9552	-12.9331	-12.6511	-15.2986	-12.9719	0.00328321	0.00984964	0.00430754	0.0107689	2.64746	2.3267	6.26562	5.01658
b4188	yjfN	chr	-	4414039,	4414315,	-15.0074	-15.0989	-14.8422	-18.2306	-18.1553	-17.8488	-16.8391	-17.0213	-16.9688	-14.9869	-18.1294	-16.937	8.09229e-05	0.00126587	0.00388144	0.0100715	3.14251	1.19244	8.83059	2.28538
b2957	ansB	chr	-	3097703,	3098750,	-11.8989	-11.8185	-11.8903	-15.3187	-15.2453	-14.5668	-13.7185	-13.6859	-13.6468	-11.8692	-15.1442	-13.6831	0.00522306	0.0129954	0.0288334	0.0447838	3.27502	1.46115	9.68009	2.75328
b2569	lepA	chr	-	2703346,	2705146,	-10.2361	-10.236	-10.2855	-15.3493	-15.3681	-13.5074	-7.93671	-7.94635	-7.94052	-10.25	-14.8877	-7.94091	0.0183209	0.0312248	0.00813389	0.0171611	4.63767	6.9468	24.8931	123.365
Below are Significant in WT/M, but not C/M
b0125	hpt	chr	+	141430,	141967,	-11.4156	-11.4472	-11.3832	-11.0846	-11.1344	-11.2011	-11.3207	-11.3019	-11.2928	-11.4166	-11.1272	-11.3052	0.00502277	0.0128365	0.0332052	0.0505698	-0.289404	-0.178018	0.81824	0.883917
b0610	rnk	chr	-	642779,	643190,	-12.9652	-12.9699	-13.017	-13.9988	-13.9932	-13.8653	-13.7224	-13.7782	-13.5628	-12.9814	-13.9753	-13.6792	0.000630315	0.00387117	0.0334322	0.0508448	0.993897	0.296162	1.99156	1.22787
b1234	rssA	chr	+	1288428,	1289373,	-15.337	-15.3949	-15.5523	-15.0439	-15.0816	-14.9684	-15.2996	-15.4822	-15.6325	-15.4153	-15.0517	-15.465	0.0119745	0.0230268	0.0335119	0.0508954	-0.36358	-0.413333	0.777234	0.750887
b0641	rlpB	chr	-	670827,	671409,	-12.804	-12.7479	-12.7943	-13.0734	-12.9777	-13.0795	-12.8731	-12.9445	-12.9092	-12.7823	-13.024	-12.9067	0.00578855	0.0138394	0.0340562	0.0515789	0.241614	0.117259	1.18231	1.08467
b0842	cmr	chr	+	882895,	884128,	-14.6482	-14.6375	-14.4528	-14.0734	-14.0461	-14.0699	-14.6215	-14.6119	-14.3482	-14.5861	-14.0587	-14.5157	0.0135153	0.0252547	0.03426	0.0517443	-0.527351	-0.456939	0.693828	0.72853
b3472	dcrB	chr	+	3607977,	3608535,	-11.3805	-11.4267	-11.3932	-11.5724	-11.6277	-11.6447	-11.552	-11.5285	-11.4979	-11.3993	-11.6115	-11.5256	0.00230309	0.00804564	0.0343741	0.0518452	0.212148	0.0858486	1.15841	1.06131
b1116	lolC	chr	+	1174649,	1175849,	-14.1937	-14.2981	-13.974	-13.7886	-13.7323	-13.6501	-13.9345	-14.0555	-14.2192	-14.1596	-13.7382	-14.0665	0.0310987	0.0472304	0.034631	0.0520892	-0.421425	-0.328283	0.746687	0.796484
b1128	ycfD	chr	-	1186341,	1187463,	-12.278	-12.2678	-12.2198	-12.1068	-12.1365	-12.0183	-12.2598	-12.1774	-12.2587	-12.2577	-12.1085	-12.2346	0.0250024	0.0397354	0.0350278	0.0525418	-0.149244	-0.126108	0.901723	0.9163
b0812	dps	chr	-	847630,	848134,	-12.2993	-12.3047	-12.2634	-11.7321	-11.8224	-11.6698	-11.9345	-11.9593	-11.8613	-12.2907	-11.7684	-11.9152	0.00382794	0.0109156	0.0359927	0.0534038	-0.522323	-0.146785	0.69625	0.903261
b3934	cytR	chr	-	4121453,	4122479,	-13.878	-13.7878	-13.8524	-14.5597	-14.5246	-14.3775	-14.2047	-14.3489	-14.23	-13.8402	-14.5132	-14.255	0.00223105	0.00792195	0.0362763	0.0536608	0.673069	0.258265	1.59446	1.19604
b1098	tmk	chr	+	1154346,	1154988,	-14.9113	-15.1762	-15.0424	-14.5419	-14.5821	-14.253	-14.9708	-14.8315	-14.8984	-15.0326	-14.5152	-14.9029	0.0127559	0.0241748	0.037332	0.0550924	-0.51748	-0.387698	0.698591	0.764348
b3164	pnp	chr	-	3307054,	3309190,	-9.00701	-8.99902	-8.9979	-8.78629	-8.77651	-8.87835	-8.95648	-8.96978	-8.92931	-9.00174	-8.79448	-8.95064	0.027828	0.0434231	0.0382587	0.0562325	-0.207261	-0.156167	0.86618	0.897406
b0492	ybbN	chr	-	516648,	517503,	-12.4999	-12.5671	-12.481	-12.1886	-12.348	-12.2694	-12.489	-12.3993	-12.4594	-12.5164	-12.2812	-12.4515	0.0163643	0.0285789	0.0386263	0.0566209	-0.235148	-0.170299	0.849598	0.888659
b3093	exuT	chr	+	3243125,	3244544,	-15.3072	-15.3296	-15.513	-16.7781	-16.5397	-16.179	-15.6507	-15.7359	-15.8478	-15.3709	-16.5523	-15.7435	0.0145115	0.0263954	0.0387093	0.0566667	1.1814	0.808807	2.26796	1.75176
b2324	mnmC	chr	+	2439785,	2441792,	-14.1647	-14.163	-14.1565	-13.9948	-14.0408	-13.9774	-14.3346	-14.6463	-14.3838	-14.1618	-14.0157	-14.4381	0.0130224	0.0245854	0.0388194	0.056752	-0.146068	-0.422415	0.90371	0.746174
b0424	yajL	chr	-	442274,	442865,	-13.8378	-13.8446	-13.7214	-13.5302	-13.5801	-13.6717	-13.806	-13.7267	-13.7323	-13.8057	-13.5763	-13.7559	0.0227769	0.03684	0.0390088	0.0569529	-0.229391	-0.17961	0.852995	0.882942
b2217	rcsB	chr	+	2314198,	2314849,	-11.3601	-11.3588	-11.3865	-11.3244	-11.2901	-11.3083	-11.3324	-11.3631	-11.3482	-11.3672	-11.3042	-11.347	0.0106683	0.021201	0.0391719	0.0569631	-0.0629665	-0.0428381	0.957294	0.970743
b0761	modE	chr	-	793078,	793867,	-13.9769	-13.9164	-13.9389	-13.7781	-13.6749	-13.7691	-13.9754	-13.8266	-13.9331	-13.9456	-13.7225	-13.9152	0.0116675	0.0226523	0.0403923	0.0586599	-0.223144	-0.19266	0.856697	0.874991
b3973	birA	chr	+	4171104,	4172070,	-14.3093	-14.4632	-14.4374	-14.0734	-14.0651	-14.2315	-14.3406	-14.5456	-14.3192	-14.3955	-14.0915	-14.3901	0.0183142	0.0312248	0.040605	0.0588906	-0.304037	-0.298667	0.809983	0.813003
b2811	csdE	chr	+	2942563,	2943007,	-15.35	-15.4525	-15.3195	-14.5898	-14.8664	-14.9332	-15.1569	-15.2799	-15.2573	-15.3743	-14.777	-15.2279	0.0206562	0.0340641	0.0411892	0.0595801	-0.597261	-0.450817	0.661008	0.731629
b4234	yjgA	chr	-	4455336,	4455888,	-13.1849	-13.2051	-13.2573	-13.1079	-13.151	-13.0699	-13.2542	-13.4706	-13.3748	-13.2121	-13.1242	-13.3583	0.0292389	0.0451143	0.0412511	0.0595909	-0.0878387	-0.234053	0.940931	0.850243
b3961	oxyR	chr	+	4156512,	4157430,	-12.3098	-12.3538	-12.3048	-12.5717	-12.6197	-12.6826	-12.4645	-12.5275	-12.5176	-12.3228	-12.6125	-12.5017	0.00398729	0.0110814	0.0419978	0.0604305	0.289695	0.110854	1.22238	1.07987
b2844	yqeF	chr	-	2982432,	2983614,	-14.4304	-14.2981	-14.4221	-15.924	-15.6097	-15.4754	-15.1258	-15.0555	-15.2573	-14.3827	-15.6851	-15.1494	0.00619417	0.0144007	0.0420912	0.0604854	1.30235	0.535639	2.4663	1.44958
b4375	prfC	chr	+	4607436,	4609026,	-10.76	-10.7978	-10.7629	-10.5328	-10.5281	-10.5702	-10.6134	-10.7198	-10.6613	-10.7733	-10.5358	-10.6612	0.000228921	0.00218735	0.042545	0.0608978	-0.237464	-0.125404	0.848235	0.916747
b3418	malT	chr	+	3551106,	3553812,	-12.5772	-12.5357	-12.5573	-14.2306	-14.1699	-13.9246	-13.8774	-13.6119	-13.7789	-12.5576	-14.1502	-13.7601	0.00319231	0.00968304	0.0459667	0.0647793	1.59264	0.390158	3.016	1.31054
b0048	folA	chr	+	49822,	50302,	-13.2163	-13.122	-13.1629	-12.7575	-12.7764	-12.9376	-13.0731	-13.0613	-12.9643	-13.1691	-12.7928	-13.0301	0.0138447	0.025608	0.0459278	0.0647793	-0.376329	-0.237308	0.770396	0.848326
b0910	cmk	chr	+	960423,	961107,	-12.6456	-12.6157	-12.6195	-12.1454	-12.1907	-12.2721	-12.3797	-12.3489	-12.2865	-12.6281	-12.1871	-12.3369	0.00516064	0.0129311	0.0468432	0.0658252	-0.441037	-0.149845	0.736605	0.901348
b4021	pepE	chr	-	4227475,	4228165,	-13.4385	-13.4352	-13.6256	-13.9708	-14.1011	-14.2102	-13.7775	-13.8315	-13.8478	-13.4886	-14.0714	-13.8181	0.00324409	0.009759	0.0476944	0.0666991	0.582892	0.253339	1.49785	1.19196
b2107	yohN	chr	+	2184981,	2185320,	-13.9785	-13.9882	-14.0683	-13.7507	-13.8057	-13.8325	-13.9893	-13.8615	-13.9733	-14.007	-13.791	-13.9448	0.00484395	0.012659	0.0476807	0.0666991	-0.215967	-0.153816	0.860969	0.89887
b1363	trkG	chr	+	1421805,	1423263,	-15.7194	-15.864	-15.7517	-15.184	-15.2703	-15.4256	-16.7418	-16.1634	-15.9157	-15.7754	-15.2625	-16.2356	0.00741759	0.0161814	0.0478345	0.0668096	-0.512911	-0.973084	0.700807	0.509416
b1446	ydcY	chr	+	1515671,	1515905,	-13.7041	-13.6497	-13.6575	-14.6144	-14.6177	-14.3541	-14.2155	-14.2012	-14.1308	-13.6724	-14.5743	-14.1807	0.00829409	0.0173321	0.0482947	0.0671101	0.901862	0.393624	1.86848	1.31369
b1609	rstB	chr	+	1680905,	1682207,	-14.6779	-14.8254	-14.7214	-14.5538	-14.3816	-14.5139	-14.734	-14.6119	-14.6613	-14.7381	-14.4565	-14.6713	0.020092	0.0334358	0.0488541	0.0678013	-0.281572	-0.214808	0.822694	0.861661
b0522	purK	chr	-	550749,	551817,	-13.784	-13.8358	-13.7121	-12.9948	-12.9222	-13.0651	-13.078	-13.214	-13.2354	-13.7798	-12.9667	-13.1723	0.000155722	0.00189462	0.0491146	0.0680766	-0.81312	-0.205633	0.56915	0.867158
b2907	ubiH	chr	-	3050361,	3051540,	-13.9702	-13.9164	-13.8647	-13.6648	-13.6197	-13.7158	-13.957	-13.8615	-13.7671	-13.9215	-13.6486	-13.8591	0.00380761	0.0109043	0.0511527	0.0707225	-0.272848	-0.210501	0.827684	0.864237
b2431	yfeX	chr	-	2547667,	2548567,	-11.8318	-11.8684	-11.8586	-12.0069	-12.0837	-12.0651	-12.0033	-11.9259	-11.9609	-11.8515	-12.0549	-11.9651	0.00527307	0.0130634	0.0513713	0.0709351	0.20331	0.0897926	1.15134	1.06422
b2813	mltA	chr	-	2944102,	2945200,	-13.2667	-13.2981	-13.2054	-12.8993	-12.9867	-12.9954	-13.1413	-13.0298	-13.074	-13.2591	-12.9582	-13.0837	0.00206029	0.00750049	0.0533865	0.0730425	-0.30093	-0.125588	0.811729	0.91663
b0219	yafV	chr	-	239418,	240189,	-15.6009	-15.4313	-15.6992	-15.9867	-16.0327	-16.3083	-15.806	-15.7925	-15.6613	-15.5686	-16.0545	-15.749	0.0156983	0.0277719	0.0532244	0.0730425	0.485873	0.305481	1.40043	1.23583
b0605	ahpC	chr	+	638167,	638731,	-8.0625	-8.02816	-8.07837	-8.2331	-8.26448	-8.15901	-8.10425	-8.10042	-8.08262	-8.05548	-8.23788	-8.0954	0.0203692	0.0336414	0.0533081	0.0730425	0.182401	0.142483	1.13477	1.1038
b3863	polA	chr	+	4044988,	4047775,	-10.9836	-10.9865	-10.9821	-10.8861	-10.9062	-10.853	-10.9667	-11.0752	-10.975	-10.9841	-10.8915	-11.0009	0.0216223	0.0354437	0.0534311	0.0730425	-0.0926933	-0.109425	0.93777	0.926958
b1982	amn	chr	+	2053084,	2054539,	-13.1811	-13.076	-13.1415	-12.8329	-13.001	-12.9332	-13.1726	-13.0555	-13.0571	-13.1341	-12.9328	-13.0959	0.0292693	0.0451143	0.0532326	0.0730425	-0.201324	-0.163166	0.869752	0.893063
b2232	ubiG	chr	+	2337588,	2338311,	-13.2332	-13.2731	-13.2291	-12.2667	-12.2743	-12.2971	-12.458	-12.5017	-12.3614	-13.2452	-12.2751	-12.4354	2.97803e-06	0.000326094	0.0543327	0.07409	-0.970078	-0.160293	0.510479	0.894843
b0658	ybeX	chr	-	690128,	691007,	-14.0491	-14.0617	-14.0827	-13.0841	-13.1166	-13.3483	-13.5138	-13.5375	-13.5028	-14.0628	-13.1375	-13.5168	0.00810182	0.0170278	0.0544653	0.0741785	-0.925304	-0.379287	0.52657	0.768818
b3034	nudF	chr	-	3175302,	3175932,	-14.7535	-14.7479	-14.6992	-14.4287	-14.5022	-14.5668	-14.9078	-14.7359	-14.6468	-14.7359	-14.4865	-14.7601	0.0159699	0.0281142	0.0547252	0.0743475	-0.249428	-0.273597	0.84123	0.827255
b0899	ycaM	chr	+	946451,	947882,	-14.9404	-14.8116	-14.8101	-16.3493	-16.4657	-16.0229	-15.6804	-15.9339	-15.8644	-14.8589	-16.3528	-15.8167	0.0047634	0.0125809	0.0550052	0.0746353	1.49388	0.536108	2.81646	1.45006
b3803	hemX	chr	-	3985907,	3987089,	-12.5365	-12.53	-12.4629	-12.7087	-12.7215	-12.6753	-12.5754	-12.4899	-12.6218	-12.5129	-12.7103	-12.5657	0.0045938	0.0123289	0.0556384	0.075401	0.197395	0.144595	1.14663	1.10542
b4279	yjhB	chr	+	4502080,	4503298,	-15.3986	-15.6164	-15.4937	-16.3493	-16.0327	-15.9863	-15.6655	-15.6638	-15.8813	-15.4954	-16.1235	-15.7381	0.0161517	0.0282978	0.0560703	0.0758924	0.62809	0.385439	1.54552	1.30626
b3842	rfaH	chr	-	4022355,	4022844,	-15.2656	-15.2029	-15.2264	-15.1123	-15.1553	-15.1384	-15.636	-15.3348	-15.6468	-15.2333	-15.1383	-15.544	0.0159554	0.0281142	0.0565257	0.0764144	-0.0949944	-0.405753	0.936276	0.754842
b3118	tdcA	chr	-	3264148,	3265087,	-13.4167	-13.3126	-13.4482	-17.3086	-17.3282	-16.4503	-15.856	-15.892	-15.8813	-13.39	-17.1532	-15.8756	0.00551055	0.013409	0.0574704	0.0774048	3.76328	1.27768	13.5788	2.42449
b1799	yeaT	chr	-	1878909,	1879833,	-15.5352	-15.5927	-15.3139	-16.4786	-16.6338	-16.7847	-16.4074	-16.214	-16.3838	-15.4863	-16.6007	-16.3395	0.000720888	0.00413789	0.0575457	0.077411	1.11442	0.261195	2.16508	1.19847
b3399	yrfG	chr	+	3526690,	3527359,	-14.0333	-14.1652	-14.1743	-13.7643	-13.7323	-13.8653	-13.9167	-13.892	-14.0428	-14.116	-13.7621	-13.9527	0.00539624	0.0132302	0.0582256	0.0781337	-0.353978	-0.190657	0.782424	0.876207
b1248	yciU	chr	-	1304844,	1305174,	-15.3285	-15.3644	-15.2211	-15.121	-15.0381	-14.9863	-15.4074	-15.3631	-15.7829	-15.3085	-15.0573	-15.5157	0.0119174	0.023015	0.0618984	0.0825564	-0.251175	-0.458346	0.840212	0.72782
b0388	aroL	chr	+	405628,	406153,	-15.6165	-15.5868	-15.6557	-15.4018	-15.2453	-15.4014	-15.7108	-15.9552	-15.5492	-15.6176	-15.3187	-15.7164	0.0236661	0.037942	0.0636594	0.0846987	-0.298945	-0.397695	0.812847	0.75907
b3338	chiA	chr	-	3465181,	3467875,	-15.5205	-15.5014	-15.4684	-16.0028	-15.9497	-16.1384	-15.8903	-15.7176	-15.8813	-15.4991	-15.994	-15.8341	0.00746266	0.0161814	0.0650127	0.0863943	0.494972	0.159961	1.40929	1.11726
b4291	fecA	chr	-	4512375,	4514700,	-13.3317	-13.3444	-13.4221	-14.1612	-14.2361	-14.2859	-14.1207	-14.0213	-14.146	-13.3613	-14.2178	-14.0995	7.26887e-05	0.00123943	0.0665366	0.0882054	0.856465	0.118327	1.8106	1.08548
b3340	fusA	chr	-	3469421,	3471536,	-6.07126	-6.06823	-6.09067	-6.45462	-6.44439	-6.41996	-6.41042	-6.39905	-6.40634	-6.07578	-6.44414	-6.40561	2.44217e-05	0.000742825	0.0672595	0.0890558	0.36836	0.0385316	1.29088	1.02707
b2571	rseB	chr	-	2705819,	2706776,	-14.3522	-14.2838	-14.1692	-13.9668	-13.9396	-14.1185	-14.4012	-14.4515	-14.1258	-14.2751	-13.974	-14.3108	0.0280222	0.0435758	0.0679118	0.0897026	-0.30111	-0.336778	0.811628	0.791808
b3415	gntT	chr	+	3544580,	3545897,	-15.1859	-15.0822	-15.0471	-15.7371	-15.752	-16.1384	-15.5649	-15.3071	-15.5225	-15.1104	-15.798	-15.4696	0.0199686	0.0333317	0.0681364	0.0897826	0.687608	0.328471	1.61061	1.25568
b1334	fnr	chr	-	1396797,	1397550,	-10.7387	-10.7179	-10.7282	-10.4712	-10.4378	-10.4029	-10.5072	-10.5165	-10.4737	-10.7288	-10.4436	-10.4979	0.00244053	0.00829932	0.0682279	0.0897951	-0.285183	-0.0543311	0.820638	0.963041
b3336	bfr	chr	-	3464270,	3464747,	-14.7535	-14.8254	-14.9476	-14.4018	-14.4265	-14.2422	-14.7031	-14.5215	-14.4898	-14.8309	-14.3895	-14.5706	0.00388936	0.0110048	0.0726278	0.0949014	-0.441422	-0.181085	0.736408	0.882039
b4466	yghJ	chr	-	3112571,	3117134,	-12.2708	-12.3266	-12.2702	-12.8675	-12.8207	-12.6789	-12.5771	-12.6014	-12.6147	-12.2889	-12.814	-12.5976	0.00754367	0.0163248	0.0727625	0.0949642	0.525062	0.216411	1.439	1.16184
b0171	pyrH	chr	+	191854,	192580,	-11.0555	-11.0732	-11.0061	-10.4863	-10.5456	-10.6581	-10.7428	-10.7056	-10.7414	-11.047	-10.5415	-10.7312	0.00502317	0.0128365	0.0732084	0.0953188	-0.505521	-0.189761	0.704406	0.876751
b1619	hdhA	chr	-	1695296,	1696064,	-12.2977	-12.2267	-12.3139	-12.7439	-12.8928	-12.7196	-12.6072	-12.5846	-12.6396	-12.2782	-12.8152	-12.6119	0.00392829	0.0110336	0.0737111	0.0958594	0.536921	0.203275	1.45087	1.15131
b1241	adhE	chr	-	1294668,	1297344,	-8.43749	-8.43663	-8.4564	-8.3191	-8.34518	-8.26662	-8.37455	-8.39791	-8.38128	-8.4426	-8.32455	-8.3838	0.0222017	0.0361231	0.0740969	0.0962469	-0.118052	-0.0592562	0.921431	0.959759
b0946	ycbW	chr	+	1005174,	1005717,	-14.5059	-14.377	-14.3714	-14.8861	-15.0168	-15.0229	-14.8731	-14.6815	-14.8313	-14.4231	-14.9727	-14.7995	0.00088182	0.00451212	0.0742749	0.0963638	0.549571	0.173214	1.46365	1.12757
b1193	emtA	chr	+	1242402,	1243014,	-13.7194	-13.687	-13.6827	-13.4842	-13.4967	-13.5401	-13.8266	-13.6247	-13.907	-13.698	-13.4988	-13.7909	0.00134369	0.00579677	0.0744485	0.0963735	-0.199178	-0.292083	0.871046	0.816722
b3526	kdgK	chr	+	3677441,	3678371,	-12.3604	-12.3463	-12.3973	-12.6809	-12.7055	-12.5467	-12.5615	-12.4667	-12.4594	-12.3661	-12.6726	-12.4965	0.0225244	0.0364855	0.0756654	0.0978201	0.306532	0.176184	1.23673	1.12989
b3284	smg	chr	-	3430012,	3430486,	-15.4489	-15.4052	-15.8793	-16.4125	-16.4371	-16.0988	-16.0366	-16.0906	-15.7829	-15.5438	-16.3736	-15.9559	0.0200433	0.0334056	0.0758227	0.0979079	0.829823	0.417731	1.77747	1.33582
b4255	rraB	chr	+	4476495,	4476912,	-12.1003	-12.1467	-12.1057	-11.9326	-11.8729	-11.9289	-12.0151	-12.0686	-11.952	-12.1171	-11.9009	-12.0077	0.00142425	0.00596551	0.0766666	0.0986486	-0.216212	-0.106771	0.860822	0.928664
b2288	nuoA	chr	-	2402650,	2403094,	-11.4574	-11.4172	-11.3969	-11.9125	-11.9873	-12.1135	-11.8339	-11.7675	-11.8888	-11.4265	-11.9796	-11.833	0.00620742	0.0144007	0.0769544	0.0986711	0.553172	0.14666	1.46731	1.107
b1333	uspE	chr	-	1395695,	1396646,	-12.5627	-12.5007	-12.5408	-13.5898	-13.5743	-13.0843	-12.9144	-12.8818	-12.819	-12.5355	-13.495	-12.8703	0.0323833	0.0488425	0.0778572	0.0995953	0.959481	0.624722	1.94461	1.54191
b3729	glmS	chr	-	3909861,	3911691,	-9.86514	-9.90508	-9.85818	-10.0227	-10.0231	-10.1135	-9.98056	-9.91608	-9.99006	-9.87629	-10.036	-9.96456	0.0146257	0.0264893	0.0798863	0.102072	0.159739	0.071465	1.11709	1.05078
b0687	seqA	chr	+	712209,	712755,	-12.3791	-12.3444	-12.3943	-12.0008	-12.0927	-11.9224	-12.0905	-12.2124	-12.1486	-12.3718	-12.0353	-12.1463	0.0119865	0.0230268	0.0811638	0.103463	-0.336443	-0.110939	0.791992	0.925985
b4065	yjcE	chr	+	4278002,	4279652,	-14.5881	-14.5927	-14.5293	-15.121	-15.167	-15.1384	-15.0657	-14.966	-14.8728	-14.5725	-15.1472	-14.9655	6.24483e-05	0.00113968	0.0816703	0.103987	0.574751	0.181777	1.48942	1.13428
b4393	trpR	chr	+	4630782,	4631109,	-16.1177	-16.137	-16.0193	-15.7237	-15.5096	-15.7847	-15.98	-15.8119	-16.1822	-16.0951	-15.6172	-15.9945	0.0235356	0.0378435	0.0825662	0.104884	-0.4779	-0.377358	0.718022	0.769846
b0440	hupB	chr	+	460674,	460947,	-9.01044	-8.95785	-9.01319	-9.89526	-9.86457	-9.75129	-9.71464	-9.66571	-9.75664	-8.99351	-9.85724	-9.71467	0.000768976	0.00419033	0.085114	0.10787	0.863726	0.142564	1.81973	1.10387
b1740	nadE	chr	+	1820481,	1821309,	-12.8212	-12.7794	-12.7158	-12.4729	-12.518	-12.4849	-12.6107	-12.8818	-12.7189	-12.7765	-12.4979	-12.7251	0.00493595	0.0127473	0.0855458	0.108292	-0.278604	-0.227245	0.824389	0.854265
b2134	pbpG	chr	-	2221959,	2222892,	-14.4122	-14.3923	-14.4497	-14.015	-14.1847	-14.0988	-14.1993	-14.3071	-14.2139	-14.4161	-14.1132	-14.2356	0.0149514	0.0268708	0.0856662	0.108319	-0.302924	-0.122329	0.810608	0.918703
b3312	rpmC	chr	-	3446589,	3446781,	-9.03125	-9.03777	-8.95786	-8.72233	-8.6578	-8.79776	-8.85758	-8.84875	-8.85555	-9.01197	-8.69928	-8.85425	0.0068416	0.0153831	0.0863684	0.109081	-0.312692	-0.15497	0.805138	0.898151
b2926	pgk	chr	-	3069480,	3070644,	-7.84639	-7.87132	-7.8595	-7.43235	-7.43101	-7.54964	-7.60055	-7.55806	-7.59439	-7.8584	-7.44847	-7.58571	0.0084117	0.0175444	0.0898875	0.113264	-0.409929	-0.137239	0.75266	0.909257
b2215	ompC	chr	-	2309667,	2310771,	-4.70803	-4.70403	-4.67712	-4.81139	-4.81726	-4.84822	-4.78962	-4.79006	-4.79267	-4.69778	-4.81984	-4.79083	0.00111682	0.00518184	0.0918336	0.11488	0.122057	0.0290073	1.08829	1.02031
b3440	yhhX	chr	-	3577790,	3578828,	-13.7083	-13.7365	-13.6664	-13.9827	-13.9958	-13.8736	-13.5649	-13.8315	-13.7789	-13.7054	-13.9727	-13.715	0.0107317	0.0212115	0.0919041	0.11488	0.267254	0.257654	1.20351	1.19553
b0081	mraZ	chr	+	89633,	90092,	-15.3544	-15.4366	-15.4374	-16.1035	-16.5096	-16.2639	-15.9078	-15.9339	-15.9688	-15.4049	-16.3254	-15.937	0.0137485	0.0255469	0.0917679	0.11488	0.920493	0.388463	1.89276	1.309
b2700	ygaD	chr	-	2821870,	2822368,	-13.8182	-13.8341	-13.7923	-14.3137	-14.5781	-14.5534	-14.271	-14.214	-14.2192	-13.816	-14.4808	-14.2356	0.0141617	0.0260185	0.0934194	0.116641	0.664856	0.245261	1.58541	1.18531
b3496	yhiP	chr	+	3638884,	3640354,	-11.8866	-11.9234	-11.92	-13.082	-12.9764	-12.8204	-12.6917	-12.7545	-12.8029	-11.9083	-12.986	-12.749	0.00441745	0.0120928	0.0938192	0.117007	1.07768	0.236964	2.11064	1.17851
b0826	moeB	chr	-	863602,	864352,	-15.1214	-14.8963	-14.9607	-14.6972	-14.5978	-14.7384	-14.8308	-14.8315	-14.7285	-14.9972	-14.6507	-14.7938	0.0228433	0.0368929	0.0945983	0.117844	-0.346477	-0.143023	0.786502	0.905619
b1764	selD	chr	-	1844988,	1846032,	-11.7539	-11.6972	-11.7388	-11.5353	-11.5855	-11.4786	-11.5938	-11.6365	-11.6236	-11.7305	-11.5523	-11.6169	0.0103279	0.0206735	0.0954113	0.118722	-0.178178	-0.0645767	0.883818	0.956226
b2869	ygeV	chr	-	3002029,	3003808,	-15.2534	-15.3296	-15.286	-18.6712	-17.5549	-17.8488	-17.3112	-16.892	-17.1208	-15.2877	-17.8902	-17.11	0.0142808	0.0261933	0.0976378	0.121355	2.60247	0.780183	6.07327	1.71735
b0773	ybhB	chr	-	806655,	807132,	-14.1878	-14.2029	-14.1616	-14.5777	-14.4838	-14.4014	-14.2542	-14.4289	-14.177	-14.1852	-14.5017	-14.2747	0.0221746	0.0361231	0.0988322	0.122561	0.31647	0.227057	1.24528	1.17044
b1804	rnd	chr	-	1884887,	1886015,	-14.6671	-14.5986	-14.6344	-14.2887	-14.283	-14.3541	-14.8991	-14.4822	-14.6042	-14.6346	-14.2953	-14.6609	0.000469364	0.00322938	0.0993841	0.123106	-0.339388	-0.365655	0.790377	0.776116
b4290	fecB	chr	-	4511428,	4512331,	-14.4213	-14.4498	-14.5358	-15.4786	-15.3413	-15.4503	-14.9345	-15.0906	-15.3249	-14.4628	-15.4019	-15.11	7.89575e-05	0.00125302	0.100329	0.123995	0.939101	0.291897	1.91733	1.22425
b0355	frmB	chr	-	376758,	377592,	-12.9429	-12.9519	-12.8866	-13.2863	-13.2957	-13.3775	-13.2795	-13.198	-13.1233	-12.9295	-13.3044	-13.1984	0.000660284	0.00393833	0.101239	0.12498	0.374924	0.105984	1.29677	1.07623
b2805	fucR	chr	+	2937389,	2938121,	-14.7767	-14.6996	-14.7029	-15.924	-15.9197	-15.3541	-15.395	-15.1884	-15.1108	-14.7294	-15.8217	-15.2279	0.0317138	0.0480293	0.10152	0.125185	1.09229	0.593867	2.13212	1.50929
b2214	apbE	chr	-	2308500,	2309556,	-15.5958	-15.6045	-15.6918	-15.4562	-15.3347	-15.2639	-15.5649	-15.4066	-15.6325	-15.6256	-15.3632	-15.5393	0.0208748	0.0343728	0.106292	0.130775	-0.262438	-0.176111	0.833678	0.885086
b0098	secA	chr	+	108278,	110984,	-10.8344	-10.8243	-10.8356	-10.9443	-10.9172	-10.9203	-10.9161	-10.8577	-10.8597	-10.8314	-10.9267	-10.8786	0.00310244	0.00951301	0.106944	0.13143	0.095265	0.0481013	1.06826	1.0339
b3610	grxC	chr	-	3782213,	3782465,	-12.1127	-12.0255	-12.0418	-12.4274	-12.553	-12.5335	-12.351	-12.4382	-12.4203	-12.0628	-12.507	-12.4009	0.00126086	0.00556712	0.107478	0.131938	0.444131	0.106076	1.36049	1.0763
b2906	visC	chr	-	3049136,	3050339,	-13.6576	-13.5364	-13.6274	-13.2912	-13.2735	-13.3658	-13.3465	-13.3847	-13.4421	-13.6077	-13.2928	-13.3912	0.00366827	0.0106617	0.110636	0.135511	-0.314906	-0.0984305	0.803903	0.934049
b1930	yedF	chr	+	2007502,	2007736,	-14.3285	-14.3053	-14.1718	-14.9629	-14.8569	-14.9332	-14.806	-14.4667	-14.7057	-14.2743	-14.9028	-14.6635	0.00082085	0.00434218	0.113535	0.138751	0.628465	0.239277	1.54592	1.1804
b2599	pheA	chr	+	2735766,	2736927,	-13.2242	-13.2838	-13.2411	-12.9988	-13.072	-12.9954	-13.0584	-13.1602	-13.2409	-13.2486	-13.0357	-13.1513	0.00260685	0.00874812	0.115078	0.14048	-0.212949	-0.115587	0.862772	0.923007
b0314	betT	chr	+	328686,	330720,	-15.7138	-15.6345	-15.6773	-15.5597	-15.4802	-15.5009	-15.856	-15.5951	-15.676	-15.6766	-15.5094	-15.711	0.0081453	0.0170864	0.116418	0.1418	-0.167202	-0.201602	0.890568	0.869585
b2304	yfcH	chr	+	2419729,	2420623,	-14.1976	-14.2074	-14.2371	-14.5777	-14.8334	-14.7537	-14.6655	-14.356	-14.402	-14.2121	-14.7315	-14.4741	0.0193795	0.032497	0.117822	0.143191	0.519388	0.257347	1.43335	1.19528
b2434	ypeA	chr	-	2549734,	2550160,	-15.4397	-15.3644	-15.4252	-15.0028	-15.0381	-14.7537	-15.1258	-15.2012	-15.1512	-15.4101	-14.9806	-15.1567	0.0270849	0.0424973	0.118479	0.14383	-0.42945	-0.176093	0.742545	0.885097
b3495	uspA	chr	+	3638133,	3638568,	-10.6999	-10.6746	-10.7436	-11.0166	-11.0217	-10.853	-10.8449	-10.7991	-10.8282	-10.7038	-10.9937	-10.8253	0.0314867	0.0477534	0.120902	0.146285	0.289944	0.168359	1.22259	1.12378
b4599	yneM	chr	+	1620669,	1620765,	-14.5652	-14.6436	-14.6845	-15.9394	-15.8149	-15.5009	-15.3827	-15.392	-15.5358	-14.6246	-15.8027	-15.4381	0.00940169	0.0190645	0.124215	0.149961	1.17814	0.364591	2.26285	1.28752
b2899	yqfA	chr	-	3040510,	3041170,	-13.9177	-14.0843	-14.0542	-14.8492	-14.6017	-14.5668	-14.4199	-14.5056	-14.4452	-14.0102	-14.6743	-14.4538	0.00643855	0.0148425	0.127058	0.153225	0.664031	0.220495	1.5845	1.16513
b0028	fkpB	chr	+	25825,	26275,	-14.0023	-13.8604	-13.941	-13.5868	-13.4336	-13.4754	-13.6215	-13.6077	-13.5765	-13.9363	-13.4893	-13.6013	0.0021768	0.00778953	0.143679	0.171756	-0.446976	-0.111969	0.733579	0.925324
b2521	sseA	chr	+	2650515,	2651361,	-12.1127	-12.0171	-12.06	-13.0069	-13.138	-12.8695	-12.7089	-12.9445	-12.8069	-12.0652	-13.051	-12.8102	0.00318761	0.00968304	0.149551	0.178386	0.985776	0.240816	1.98038	1.18166
b0660	ybeZ	chr	-	691560,	692601,	-12.9169	-12.9266	-12.9931	-12.2703	-12.3927	-12.4565	-12.4939	-12.5295	-12.4452	-12.9416	-12.3597	-12.4867	0.00345548	0.0102541	0.154731	0.183963	-0.581902	-0.126988	0.668082	0.915741
b0080	fruR	chr	+	88027,	89032,	-13.6684	-13.5839	-13.4905	-14.1657	-14.0461	-13.882	-13.6433	-13.9339	-13.8898	-13.5875	-14.0587	-13.8109	0.0146356	0.0264893	0.163129	0.19311	0.471186	0.247818	1.38625	1.18741
b2948	yqgE	chr	+	3090958,	3091522,	-14.419	-14.6406	-14.4653	-14.0315	-14.1322	-14.1284	-14.1674	-14.2664	-14.1208	-14.5027	-14.0972	-14.1788	0.0130712	0.0245927	0.186138	0.218927	-0.40551	-0.0815869	0.754969	0.945018
b3805	hemC	chr	-	3987847,	3988789,	-12.9185	-12.9766	-12.8855	-13.1477	-13.2299	-13.3425	-13.1886	-13.0818	-13.1233	-12.9279	-13.2178	-13.1332	0.0172709	0.0297821	0.186693	0.219345	0.289841	0.0845886	1.22251	1.06039
b0094	ftsA	chr	+	103981,	105244,	-12.1265	-12.1472	-12.1509	-12.0377	-12.0414	-12.0771	-12.098	-12.1602	-12.0619	-12.1404	-12.0454	-12.103	0.00673115	0.0152285	0.188473	0.220962	-0.0949409	-0.057555	0.936311	0.960891
b0088	murD	chr	+	97086,	98403,	-12.8114	-12.8481	-12.7913	-12.6098	-12.5899	-12.5736	-12.6507	-12.7084	-12.5972	-12.8177	-12.5941	-12.648	0.000803541	0.00429208	0.190088	0.222616	-0.22362	-0.0539673	0.856414	0.963284
b0888	trxB	chr	-	930307,	931273,	-11.0212	-11.0173	-11.0268	-10.8128	-10.8256	-10.772	-10.8287	-10.9332	-10.8379	-11.0215	-10.8132	-10.8621	0.00446807	0.0121403	0.190943	0.223378	-0.208239	-0.0488534	0.865593	0.966704
b1593	ynfK	chr	-	1664547,	1665243,	-13.5958	-13.6239	-13.5309	-14.9163	-14.9906	-14.5668	-14.636	-14.5215	-14.5765	-13.5861	-14.8952	-14.5803	0.00861583	0.0178042	0.194275	0.227034	1.30915	0.3149	2.47796	1.24393
b1641	slyB	chr	+	1717899,	1718367,	-8.94196	-8.90771	-8.89835	-9.10191	-9.11279	-9.13398	-9.08066	-9.10919	-9.09995	-8.91795	-9.11226	-9.09589	0.000445585	0.00316828	0.195861	0.228644	0.194311	0.0163728	1.14418	1.01141
b2707	srlR	chr	+	2827068,	2827842,	-14.4489	-14.5293	-14.6415	-15.0356	-15.001	-14.7847	-14.593	-14.9128	-14.7515	-14.5287	-14.978	-14.7381	0.0174866	0.0300544	0.197584	0.230165	0.449242	0.239928	1.36532	1.18093
b2777	ygcF	chr	-	2902768,	2903440,	-13.7535	-13.8376	-13.9965	-13.3622	-13.2814	-13.2915	-13.4168	-13.3174	-13.5126	-13.8477	-13.3094	-13.4194	0.00959354	0.0193818	0.198493	0.230978	-0.53832	-0.109985	0.688572	0.926598
b2598	pheL	chr	+	2735620,	2735668,	-13.5501	-13.7929	-13.824	-12.9087	-12.7531	-12.5975	-12.957	-12.9312	-12.8707	-13.7038	-12.7782	-12.9183	0.00148874	0.00608271	0.198714	0.230989	-0.925626	-0.140061	0.526452	0.907481
b2206	napA	chr	-	2298288,	2300775,	-12.7194	-12.6752	-12.7233	-14.2306	-14.0734	-13.8005	-13.7695	-13.7406	-13.907	-12.7057	-14.0786	-13.808	0.00808239	0.0170197	0.201915	0.233965	1.37288	0.27053	2.58988	1.20625
b4390	nadR	chr	+	4625337,	4626570,	-14.1495	-14.137	-14.1846	-14.6268	-14.6917	-14.5804	-14.5649	-14.5537	-14.6042	-14.1553	-14.6529	-14.5754	0.00135656	0.00580248	0.203671	0.235502	0.497581	0.0774294	1.41184	1.05514
b1640	anmK	chr	-	1716516,	1717626,	-14.6644	-14.5606	-14.7103	-15.0274	-14.8103	-14.9863	-14.5719	-14.4214	-14.9598	-14.6417	-14.9053	-14.648	0.0264782	0.0417175	0.204273	0.235948	0.263591	0.257291	1.20046	1.19523
b4053	alr	chr	+	4263804,	4264884,	-14.4819	-14.5435	-14.4313	-14.955	-14.7388	-14.9684	-14.593	-14.6994	-14.8728	-14.4872	-14.841	-14.719	0.0196097	0.0328328	0.208372	0.240429	0.353775	0.121909	1.2779	1.08817
b2181	yejG	chr	-	2275914,	2276259,	-15.1251	-15.6104	-15.2478	-16.6972	-16.6666	-16.8488	-16.3585	-16.0213	-16.7361	-15.3069	-16.7026	-16.3646	0.00505881	0.0128365	0.213334	0.245896	1.3957	0.337983	2.63115	1.26399
b3465	rsmD	chr	+	3602415,	3603012,	-15.8182	-15.9	-15.8463	-15.4673	-15.3748	-15.5804	-15.7418	-15.5951	-15.4963	-15.853	-15.4344	-15.6075	0.0136309	0.0254272	0.216647	0.249452	-0.41859	-0.1731	0.748155	0.886935
b1662	ribC	chr	-	1740624,	1741266,	-12.6237	-12.5657	-12.6039	-12.7154	-12.7378	-12.7308	-12.4906	-12.6616	-12.6964	-12.5986	-12.7292	-12.6113	0.00910015	0.0185814	0.219794	0.252544	0.130658	0.117943	1.09479	1.08519
b0553	nmpC	chr	-	573751,	576048,	-7.58098	-7.55723	-7.58933	-8.34873	-8.32495	-8.24353	-8.24284	-8.2576	-8.24973	-7.57541	-8.3204	-8.24963	0.000874645	0.00449642	0.220934	0.253323	0.74499	0.0707674	1.67596	1.05028
b0924	mukB	chr	+	975548,	980009,	-11.631	-11.6709	-11.6561	-11.8815	-11.8801	-12.0252	-11.8276	-11.8315	-11.8813	-11.6514	-11.9012	-11.8476	0.0238154	0.0381256	0.224164	0.256757	0.249827	0.0535542	1.18906	1.03782
b1378	ydbK	chr	-	1435283,	1438808,	-12.5065	-12.5506	-12.5792	-12.9144	-12.8675	-12.8778	-12.8412	-12.8489	-12.8856	-12.5417	-12.8846	-12.8591	0.000392406	0.00290229	0.228575	0.261536	0.342902	0.0254607	1.26831	1.0178
b0413	nrdR	chr	+	432225,	432675,	-13.7435	-13.8168	-13.818	-13.9827	-13.9984	-14.1585	-14.0657	-13.8365	-13.8644	-13.7888	-14.0157	-13.9229	0.0304419	0.0463819	0.249667	0.283889	0.226957	0.0928235	1.17036	1.06646
b3639	dfp	chr	+	3810753,	3811974,	-12.3258	-12.35	-12.3062	-12.6315	-12.6127	-12.6644	-12.6179	-12.5578	-12.6254	-12.3281	-12.6265	-12.6025	0.000118723	0.00160495	0.250401	0.284429	0.29842	0.0240064	1.2298	1.01678
b0908	aroA	chr	+	958034,	959318,	-13.3863	-13.3644	-13.3626	-13.0089	-13.001	-13.0229	-13.1387	-13.3037	-13.0007	-13.3722	-13.0069	-13.1332	4.67758e-06	0.000465631	0.258451	0.292359	-0.365317	-0.126308	0.776298	0.916173
b1216	chaA	chr	-	1269971,	1271072,	-12.8378	-12.8666	-12.8647	-12.749	-12.7675	-12.7346	-12.9167	-12.7267	-12.8728	-12.8551	-12.7563	-12.8429	0.00134076	0.00579677	0.261922	0.295675	-0.0987162	-0.0865187	0.933864	0.941793
b0925	ycbB	chr	+	980269,	982117,	-14.8032	-14.7744	-14.7214	-15.0523	-15.1152	-14.9863	-14.734	-14.9024	-15.0715	-14.7698	-15.0743	-14.8967	0.00505897	0.0128365	0.263463	0.296802	0.304455	0.177537	1.23495	1.13095
b2595	yfiO	chr	+	2734167,	2734905,	-11.4261	-11.4036	-11.371	-11.1691	-11.1803	-11.2598	-11.2278	-11.2773	-11.2368	-11.4027	-11.188	-11.2455	0.00800809	0.0169773	0.263342	0.296802	-0.21464	-0.0574392	0.861761	0.960968
b1864	yebC	chr	-	1945434,	1946175,	-10.0709	-10.034	-10.0527	-9.79865	-9.81175	-9.87782	-9.88006	-9.86051	-9.85842	-10.0533	-9.81695	-9.86657	0.00507752	0.0128365	0.267694	0.301259	-0.236345	-0.0496118	0.848893	0.966196
b2622	intA	chr	+	2754180,	2755422,	-14.8272	-14.8254	-14.8341	-15.6457	-15.5096	-15.3775	-15.4325	-15.2269	-15.4705	-14.8286	-15.5327	-15.3816	0.0125612	0.0239626	0.282544	0.316423	0.704065	0.151085	1.62909	1.1104
b1329	mppA	chr	+	1391250,	1392864,	-12.4712	-12.4986	-12.5682	-13.0734	-13.0036	-12.7965	-12.7957	-12.8464	-12.8707	-12.5076	-12.9934	-12.837	0.0233479	0.0375969	0.282671	0.316423	0.485785	0.156365	1.40035	1.11448
b4406	yaeP	chr	-	213924,	214125,	-15.3157	-15.1543	-15.2805	-16.2691	-16.2515	-16.0988	-15.7897	-16.2934	-15.8813	-15.2502	-16.2336	-15.9559	0.000207381	0.00208332	0.292355	0.326662	0.983406	0.277683	1.97713	1.21225
b4140	fxsA	chr	+	4366686,	4367163,	-15.9635	-15.9	-15.7903	-15.37	-15.4585	-15.3775	-15.636	-15.4515	-15.4081	-15.891	-15.4163	-15.497	0.00305125	0.00946494	0.301538	0.335894	-0.474768	-0.0807712	0.719583	0.945552
b4394	yjjX	chr	-	4631255,	4631768,	-15.2493	-15.163	-15.1846	-14.7575	-14.9296	-14.6936	-14.7576	-15.0671	-14.9688	-15.2016	-14.8337	-14.9183	0.0190274	0.0320584	0.302719	0.336867	-0.367857	-0.0845432	0.774933	0.943083
b3832	rmuC	chr	+	4015355,	4016783,	-14.7194	-14.8463	-14.9088	-15.955	-15.8711	-15.6936	-15.6655	-15.8716	-15.5765	-14.8137	-15.8703	-15.6897	0.00070568	0.00413219	0.31081	0.344122	1.05663	0.180615	2.08007	1.13337
b2729	hypD	chr	+	2850157,	2851279,	-15.337	-15.3544	-15.4191	-16.3288	-16.4802	-16.1384	-15.9255	-16.214	-16.2907	-15.3659	-16.3736	-16.1314	0.00770652	0.016514	0.311891	0.34497	1.00772	0.242234	2.01073	1.18282
b2513	yfgM	chr	-	2636684,	2637305,	-12.1067	-12.121	-12.1452	-12.263	-12.2648	-12.2503	-12.1529	-12.2498	-12.2477	-12.1224	-12.2621	-12.2145	0.00270865	0.00887554	0.313542	0.346447	0.13967	0.0475722	1.10165	1.03352
b0484	copA	chr	-	508098,	510603,	-14.1363	-14.0822	-14.1265	-14.2594	-14.3151	-14.3541	-14.1156	-14.2334	-14.3307	-14.1153	-14.3019	-14.224	0.0068688	0.0153832	0.316552	0.349419	0.186565	0.0778803	1.13805	1.05547
b2584	yfiQ	chr	+	2717974,	2720635,	-13.6779	-13.676	-13.7689	-15.5959	-15.348	-15.7847	-15.243	-15.5784	-15.3838	-13.7028	-15.4865	-15.3858	0.00302513	0.00941057	0.33926	0.372608	1.78371	0.10064	3.44311	1.07225
b1853	yebK	chr	+	1934675,	1935545,	-13.6205	-13.6134	-13.6468	-14.1387	-13.9854	-13.8989	-13.8991	-13.9824	-13.8856	-13.6256	-14.0212	-13.9183	0.0301021	0.0461004	0.352806	0.385552	0.39561	0.10295	1.3155	1.07397
b1855	lpxM	chr	-	1937245,	1938217,	-13.7124	-13.6559	-13.714	-13.2789	-13.3233	-13.4628	-13.3376	-13.4978	-13.4547	-13.6938	-13.328	-13.4249	0.0171778	0.0296684	0.36449	0.396736	-0.36585	-0.0969326	0.776011	0.935019
b4350	hsdR	chr	-	4581271,	4584838,	-13.0749	-13.0375	-13.1081	-13.6362	-13.7065	-13.594	-13.5206	-13.6077	-13.6541	-13.0717	-13.6657	-13.5926	0.000362909	0.00276541	0.372091	0.404206	0.593973	0.0730447	1.5094	1.05193
b2412	zipA	chr	-	2528268,	2529255,	-12.0386	-12.0827	-12.063	-12.4885	-12.463	-12.441	-12.4939	-12.3993	-12.3778	-12.0601	-12.4681	-12.4238	2.88952e-05	0.000811288	0.37833	0.409764	0.408001	0.0443442	1.32685	1.03121
b1912	pgsA	chr	-	1990292,	1990841,	-13.3167	-13.2142	-13.2722	-13.5186	-13.3919	-13.5401	-13.4452	-13.4364	-13.4173	-13.2692	-13.4546	-13.4326	0.0232164	0.0374403	0.388578	0.420447	0.185428	0.0220374	1.13715	1.01539
b1618	uidR	chr	-	1694485,	1695076,	-14.8609	-15.0335	-14.9785	-15.2402	-15.283	-15.0988	-15.1569	-15.2269	-14.942	-14.95	-15.2399	-15.0959	0.0299668	0.0459574	0.397008	0.429145	0.289915	0.144004	1.22257	1.10497
b4179	rnr	chr	+	4404676,	4407118,	-12.0893	-12.1284	-12.0565	-12.3049	-12.343	-12.4256	-12.2924	-12.2765	-12.3733	-12.0927	-12.342	-12.3159	0.0060517	0.0142202	0.401967	0.43365	0.249365	0.0261644	1.18868	1.0183
b2735	ygbI	chr	-	2858488,	2859286,	-14.8702	-14.9481	-14.8586	-15.4562	-15.5096	-15.331	-15.5649	-14.966	-15.2139	-14.8922	-15.4639	-15.2433	0.00272101	0.00887554	0.403179	0.434101	0.571694	0.220652	1.48627	1.16526
b2684	mprA	chr	+	2808791,	2809322,	-11.6499	-11.6909	-11.708	-11.1505	-11.1593	-11.2516	-11.1946	-11.2188	-11.2525	-11.68	-11.1697	-11.2221	0.00080298	0.00429208	0.409829	0.440396	-0.510286	-0.0524387	0.702083	0.964305
b1414	ydcF	chr	+	1485258,	1486059,	-13.8969	-13.8411	-13.8121	-14.1343	-14.2672	-14.1484	-14.1055	-14.151	-14.1614	-13.8536	-14.2037	-14.1386	0.00502271	0.0128365	0.413537	0.443509	0.350107	0.0651135	1.27465	1.04617
b1418	cybB	chr	+	1488925,	1489456,	-12.7892	-12.782	-12.824	-12.7405	-12.7012	-12.6973	-12.7438	-12.6837	-12.9266	-12.7967	-12.7136	-12.7874	0.0108656	0.0214375	0.430556	0.459959	-0.0830372	-0.0737705	0.944068	0.950152
b1856	yebA	chr	-	1938336,	1939659,	-12.6944	-12.7012	-12.8121	-13.2165	-13.2974	-13.1135	-13.1156	-13.2334	-13.1058	-12.7294	-13.2415	-13.1458	0.00280499	0.0089547	0.443177	0.472981	0.512111	0.0957252	1.42614	1.0686
b0386	proC	chr	-	404058,	404868,	-12.5747	-12.5111	-12.5573	-12.7456	-12.8439	-12.8204	-12.7438	-12.7853	-12.7948	-12.5483	-12.8069	-12.774	0.00348654	0.0103183	0.455089	0.484794	0.258563	0.0328548	1.19629	1.02303
b3469	zntA	chr	+	3604473,	3606672,	-12.4932	-12.4425	-12.4123	-12.7071	-12.7944	-12.8695	-12.7301	-12.7853	-12.7227	-12.4528	-12.7753	-12.7435	0.00779632	0.0166089	0.455325	0.484794	0.322521	0.0317777	1.25051	1.02227
b0242	proB	chr	+	259611,	260715,	-13.114	-13.1072	-13.0436	-12.9317	-13.0023	-12.916	-13.0033	-12.9259	-13.0169	-13.0913	-12.9654	-12.9848	0.017324	0.0298268	0.455573	0.484794	-0.125884	-0.0193932	0.916442	0.986648
b3156	yhbS	chr	-	3298276,	3298780,	-13.61	-13.6149	-13.586	-13.9087	-13.9725	-13.8989	-14.0127	-13.7406	-13.8272	-13.6047	-13.9399	-13.8621	0.00197554	0.00743373	0.498679	0.528099	0.335179	0.0777978	1.26153	1.05541
b4124	dcuR	chr	-	4347337,	4348057,	-13.9404	-13.9633	-13.8939	-14.4673	-14.5899	-14.7233	-14.4452	-14.6815	-14.402	-13.9344	-14.5663	-14.4947	0.00843236	0.0175541	0.503432	0.532617	0.631836	0.0715397	1.54954	1.05084
b4207	fklB	chr	+	4426957,	4427578,	-10.8096	-10.8778	-10.8213	-10.9842	-10.9825	-10.9562	-10.925	-10.9299	-11.0047	-10.8353	-10.9791	-10.9543	0.0121426	0.02327	0.506599	0.534418	0.143839	0.0248352	1.10484	1.01736
b0188	tilS	chr	+	212330,	213629,	-15.2292	-15.3494	-15.3714	-14.9394	-15.1265	-14.9684	-15.0855	-15.3071	-14.9244	-15.3085	-15.0378	-15.0855	0.0160813	0.0282197	0.50632	0.534418	-0.270728	-0.0477175	0.828901	0.967466
b0420	dxs	chr	-	437538,	439401,	-12.2631	-12.2684	-12.2512	-12.5375	-12.4371	-12.5534	-12.5105	-12.3296	-12.5275	-12.2614	-12.487	-12.4605	0.0191797	0.0322607	0.514136	0.541326	0.225539	0.0264371	1.16921	1.01849
b1101	ptsG	chr	+	1157091,	1158525,	-10.7718	-10.7805	-10.7952	-11.5959	-11.6027	-11.5787	-11.5983	-11.5993	-11.5292	-10.7814	-11.5969	-11.5736	1.38072e-07	7.55943e-05	0.548899	0.576265	0.815495	0.0232579	1.7599	1.01625
b4342	yjiT	chr	+	4570436,	4571939,	-14.1233	-14.0597	-14.1898	-14.9787	-14.9296	-14.8005	-14.8142	-14.9024	-14.8728	-14.1203	-14.9257	-14.8606	0.000501023	0.00335655	0.550623	0.576969	0.805429	0.0650974	1.74767	1.04616
b4295	yjhU	chr	-	4517360,	4518347,	-13.8333	-13.6854	-13.8321	-14.1079	-14.0816	-14.1998	-14.243	-14.0383	-13.9157	-13.7821	-14.1074	-14.0596	0.00612433	0.0143299	0.581424	0.608661	0.325325	0.0477491	1.25295	1.03365
b4020	yjbB	chr	+	4225753,	4227385,	-14.987	-14.8783	-14.8545	-15.4233	-15.4513	-15.4754	-15.4325	-15.0671	-15.5765	-14.9117	-15.4454	-15.3604	0.00241306	0.00825719	0.608748	0.636657	0.533759	0.0850377	1.4477	1.06072
b1726	yniB	chr	-	1806720,	1807257,	-14.8455	-14.6838	-14.8261	-15.3911	-15.348	-15.331	-15.2654	-15.0441	-15.5225	-14.7843	-15.3597	-15.2786	0.00395285	0.0110364	0.624862	0.652886	0.575392	0.0810688	1.49008	1.0578
b1222	narX	chr	-	1275044,	1276841,	-13.5452	-13.6001	-13.513	-14.3339	-14.4478	-14.5804	-14.4388	-14.2465	-14.5093	-13.5538	-14.4271	-14.4031	0.00287663	0.00915672	0.626915	0.654406	0.873354	0.024066	1.83192	1.01682
b4156	yjeM	chr	+	4381861,	4383364,	-14.4559	-14.4959	-14.3861	-15.0863	-15.2894	-15.3541	-15.2654	-15.151	-15.1718	-14.4486	-15.2272	-15.1975	0.00462952	0.0123642	0.63237	0.658844	0.778671	0.0297553	1.71555	1.02084
b0952	ymbA	chr	+	1014118,	1014682,	-14.1085	-14.0968	-14.1093	-14.4673	-14.4442	-14.3894	-14.4012	-14.4822	-14.36	-14.1048	-14.4436	-14.4096	0.00396103	0.0110364	0.679825	0.704265	0.338752	0.033999	1.26466	1.02385
b0167	glnD	chr	-	185977,	188650,	-14.711	-14.5897	-14.6309	-14.9472	-14.905	-14.882	-14.9078	-14.7267	-14.9961	-14.6468	-14.9155	-14.8816	0.00659011	0.0150358	0.709494	0.732094	0.268677	0.0338914	1.2047	1.02377
b3773	ilvY	chr	-	3954949,	3955843,	-15.7083	-15.6345	-15.6628	-16.5013	-16.4802	-16.2639	-16.1779	-16.6638	-16.2032	-15.6704	-16.4528	-16.3148	0.00666065	0.0151394	0.729363	0.749909	0.782429	0.137958	1.72002	1.10035
b0676	nagC	chr	-	699596,	700817,	-14.3874	-14.3469	-14.416	-13.7473	-13.741	-13.7233	-13.6842	-13.9286	-13.6871	-14.3819	-13.7405	-13.7532	0.000280677	0.00239577	0.751693	0.772142	-0.64144	-0.0127021	0.641073	0.991234
b0053	surA	chr	-	53415,	54702,	-11.1122	-11.1559	-11.1502	-11.0981	-11.071	-11.0663	-11.1125	-11.0298	-11.1208	-11.1375	-11.0793	-11.0905	0.026625	0.0418885	0.787124	0.807024	-0.0582166	-0.0112092	0.960451	0.99226
b3203	hpf	chr	+	3344194,	3344482,	-12.8084	-12.7644	-12.7806	-13.4287	-13.584	-13.3083	-13.4199	-13.4706	-13.36	-12.7857	-13.4874	-13.4128	0.0127828	0.0241748	0.804468	0.822495	0.701733	0.0745799	1.62646	1.05305
b2399	yfeD	chr	+	2516855,	2517227,	-15.3114	-15.4366	-15.6992	-17.0523	-16.8241	-16.3541	-16.458	-16.9339	-16.6468	-15.4557	-16.8122	-16.6532	0.0113915	0.0222618	0.810836	0.828233	1.35653	0.159038	2.56068	1.11654
b4480	hdfR	chr	-	3945150,	3945990,	-14.8922	-14.9443	-15.0803	-15.2024	-15.2147	-15.3083	-15.2542	-15.3209	-15.1009	-14.9614	-15.2241	-15.2164	0.0218732	0.0358015	0.836178	0.852528	0.262709	0.00768648	1.19973	1.00534
b1814	sdaA	chr	+	1894955,	1896320,	-10.9882	-10.9709	-11.055	-11.0895	-11.1032	-11.1687	-11.115	-11.119	-11.1102	-11.0012	-11.1081	-11.1144	0.031001	0.0471473	0.836132	0.852528	0.106926	-0.00633183	1.07693	0.995621
b3398	yrfF	chr	+	3524490,	3526626,	-14.0333	-14.1478	-14.0996	-14.7643	-14.6875	-14.7537	-14.558	-14.6994	-14.8898	-14.0895	-14.7225	-14.711	0.000177586	0.00198336	0.860997	0.873764	0.63296	0.0115233	1.55074	1.00802
b3911	cpxA	chr	-	4101624,	4102998,	-14.3566	-14.3469	-14.3139	-14.5186	-14.6379	-14.6644	-14.6955	-14.6904	-14.3718	-14.341	-14.6007	-14.5706	0.0202491	0.0336414	0.869087	0.881157	0.259677	0.0301395	1.19721	1.02111
b1782	mipA	chr	-	1863749,	1864496,	-9.2381	-9.18626	-9.18977	-9.46647	-9.44642	-9.49289	-9.48854	-9.45814	-9.45248	-9.20681	-9.45992	-9.46666	0.000324946	0.00264157	0.905888	0.915926	0.253115	-0.0067341	1.19178	0.995343
b2132	bglX	chr	-	2217713,	2220011,	-12.0478	-12.0581	-12.0227	-12.2716	-12.2917	-12.179	-12.2668	-12.2565	-12.2099	-12.044	-12.2677	-12.2433	0.0203067	0.0336414	0.942396	0.94905	0.223765	0.024458	1.16778	1.0171
b0409	secF	chr	+	428728,	429700,	-11.8863	-11.8936	-11.8668	-12.2036	-12.2231	-12.1636	-12.1582	-12.1295	-12.2921	-11.8831	-12.2076	-12.1956	0.000731676	0.00413789	0.952464	0.957712	0.324515	0.0119931	1.25224	1.00835
b0280	yagN	chr	-	294362,	294803,	-12.5926	-12.6513	-12.6477	-13.8602	-13.8381	-13.5335	-13.7301	-13.7221	-13.7593	-12.6276	-13.7957	-13.7381	0.00733611	0.0160661	0.955033	0.959414	1.16808	0.0576343	2.24713	1.04076
b2699	recA	chr	-	2820729,	2821791,	-10.1066	-10.1398	-10.0809	-9.8634	-9.83326	-9.8973	-9.84096	-9.89915	-9.85555	-10.1101	-9.85266	-9.86312	0.00064907	0.00390512	0.983322	0.984221	-0.257418	-0.0104602	0.836584	0.992776
Below are not significant in WT/M, but are significant in C/M
b2147	yeiA	chr	+	2233286,	2234522,	-15.3457	-15.3346	-15.2159	-15.4342	-15.5246	-15.4256	-13.9435	-13.9879	-14.038	-15.3037	-15.4789	-13.9897	0.039101	0.0566343	4.78564e-06	0.000232895	0.175257	1.48927	1.12917	2.80747
b1819	manZ	chr	+	1901909,	1902770,	-11.0896	-11.1298	-11.0118	-11.0429	-11.0771	-11.116	-10.4113	-10.364	-10.3486	-11.0799	-11.0713	-10.3748	0.970384	0.970384	1.72561e-05	0.000524873	-0.0086392	0.696487	0.99403	1.62055
b0114	aceE	chr	+	123016,	125680,	-7.90668	-7.91817	-7.90202	-7.89326	-7.90008	-7.89862	-8.90577	-8.92396	-8.93164	-7.90915	-7.89758	-8.92029	0.121479	0.146983	1.79975e-05	0.00052489	-0.0115716	-1.02271	0.992011	0.49219
b2585	pssA	chr	+	2720748,	2722104,	-12.5023	-12.5321	-12.5523	-12.4871	-12.4784	-12.4441	-13.1993	-13.1821	-13.2518	-12.5264	-12.4761	-13.2126	0.0398248	0.057405	3.37282e-05	0.000767821	-0.0502921	-0.736485	0.965741	0.6002
b0469	apt	chr	+	490635,	491187,	-11.393	-11.4182	-11.3932	-11.2177	-11.2469	-11.3382	-12.2867	-12.3721	-12.2935	-11.4014	-11.2502	-12.3138	0.0596989	0.080704	3.73355e-05	0.000775286	-0.151224	-1.06366	0.900486	0.478416
b2081	yegQ	chr	+	2163691,	2165053,	-12.2687	-12.3205	-12.2825	-12.2546	-12.2147	-12.1739	-12.9078	-12.8792	-12.971	-12.2897	-12.2217	-12.9214	0.0614978	0.0825247	4.62619e-05	0.000775286	-0.0680004	-0.699646	0.953959	0.615723
b3387	dam	chr	-	3513098,	3513935,	-14.7914	-14.9824	-14.822	-14.7371	-14.7786	-14.6936	-15.6655	-15.629	-15.6183	-14.8612	-14.7518	-15.6378	0.149372	0.176824	4.0004e-05	0.000775286	-0.109454	-0.885998	0.926939	0.541113
b0949	uup	chr	+	1009186,	1011094,	-12.3758	-12.509	-12.3714	-12.263	-12.2193	-12.2831	-12.7775	-12.8615	-12.8333	-12.4174	-12.2431	-12.8217	0.0523815	0.0722389	8.39594e-05	0.00112116	-0.174301	-0.578575	0.886197	0.669625
b2531	iscR	chr	-	2659664,	2660153,	-12.2661	-12.2439	-12.2351	-12.1376	-12.1892	-12.2208	-12.7457	-12.6704	-12.7208	-12.2498	-12.1763	-12.7143	0.0989092	0.121692	9.13218e-05	0.00112767	-0.0734479	-0.538	0.950364	0.688725
b1233	ychJ	chr	-	1287896,	1288355,	-13.9988	-14.0315	-14.0851	-13.9827	-14.0036	-13.916	-14.5038	-14.5456	-14.5972	-14.034	-13.9833	-14.5488	0.123557	0.149003	0.000104436	0.00115513	-0.0506602	-0.565513	0.965494	0.675715
b4160	psd	chr	-	4387414,	4388383,	-12.8227	-12.8022	-12.815	-12.6051	-12.7291	-12.6973	-13.5005	-13.5056	-13.3959	-12.8137	-12.6818	-13.4639	0.0636445	0.0846788	0.000106897	0.00117053	-0.131838	-0.782069	0.912668	0.581532
b2143	cdd	chr	+	2229865,	2230750,	-12.547	-12.4938	-12.4684	-12.5113	-12.5378	-12.4722	-12.1068	-12.168	-12.1435	-12.5064	-12.519	-12.1377	0.89968	0.907136	0.000150786	0.0014742	0.0126042	0.381344	1.00877	1.30255
b2522	sseB	chr	-	2652178,	2652955,	-13.2143	-13.2278	-13.2888	-13.1771	-13.0747	-13.0795	-13.7816	-13.6904	-13.7515	-13.2398	-13.1088	-13.7435	0.0360808	0.0532459	0.000164645	0.00154809	-0.130941	-0.634683	0.913236	0.644082
b0025	ribF	chr	+	21406,	22348,	-13.5627	-13.5097	-13.6344	-13.4729	-13.5511	-13.5534	-13.98	-14.0671	-14.0428	-13.5648	-13.5249	-14.0276	0.394688	0.42371	0.000169347	0.00157148	-0.0399303	-0.502705	0.972702	0.705782
b3705	yidC	chr	+	3883098,	3884745,	-9.7323	-9.72336	-9.71421	-9.63976	-9.61805	-9.6876	-9.98201	-10.0287	-10.0443	-9.72413	-9.63544	-10.0177	0.0600011	0.0810126	0.000194084	0.0016571	-0.0886918	-0.38224	0.940375	0.767245
b0026	ileS	chr	+	22390,	25207,	-9.58911	-9.58058	-9.58003	-9.4733	-9.5159	-9.56723	-10.0703	-10.0098	-10.0505	-9.58367	-9.50896	-10.0452	0.139449	0.167064	0.000223891	0.00184331	-0.0747055	-0.536237	0.949536	0.689567
b1715	pheM	chr	-	1797249,	1797294,	-15.7138	-15.7414	-15.8545	-15.5597	-15.7086	-15.5534	-16.6215	-16.4364	-16.5628	-15.7621	-15.6339	-16.544	0.072503	0.0942883	0.000242135	0.00195241	-0.128238	-0.910177	0.914948	0.53212
b0688	pgm	chr	+	712780,	714421,	-10.7846	-10.7601	-10.7294	-10.7477	-10.7789	-10.7965	-10.4853	-10.534	-10.4821	-10.7604	-10.771	-10.4983	0.488293	0.518101	0.000279358	0.00212428	0.0105238	0.27263	1.00732	1.20801
b4222	ytfP	chr	+	4445916,	4446258,	-14.6165	-14.7611	-14.61	-14.4233	-14.5283	-14.4754	-14.9255	-14.999	-14.9869	-14.6611	-14.4846	-14.9687	0.041786	0.0597333	0.00031	0.00224801	-0.176509	-0.484075	0.884842	0.714955
b3250	mreC	chr	-	3396896,	3398000,	-13.7521	-13.8498	-13.7177	-13.5449	-13.6297	-13.6501	-14.0805	-14.1205	-14.1927	-13.7737	-13.6038	-14.1314	0.033795	0.0507611	0.000341635	0.00242916	-0.169937	-0.52762	0.888881	0.693698
b1048	mdoG	chr	+	1108557,	1110093,	-10.6803	-10.6387	-10.6528	-10.6117	-10.6072	-10.5401	-11.1137	-11.1471	-11.1208	-10.6585	-10.5985	-11.126	0.0722745	0.0942149	0.000392122	0.00268359	-0.0599481	-0.5275	0.959299	0.693756
b2570	rseC	chr	-	2705343,	2705823,	-15.9177	-16.1199	-15.9563	-15.9867	-15.9396	-16.3083	-12.3889	-12.4401	-12.4995	-15.9933	-16.0048	-12.4426	0.583886	0.608909	0.000479637	0.00301841	0.0115149	3.56225	1.00801	11.8126
b2812	ygdL	chr	-	2943057,	2943864,	-13.9404	-13.7811	-13.9152	-13.7851	-13.6875	-13.7537	-14.271	-14.3847	-14.2628	-13.8784	-13.7292	-14.3006	0.090767	0.113459	0.000512381	0.0031344	-0.149239	-0.571435	0.901726	0.672947
b2834	tas	chr	+	2969618,	2970659,	-13.427	-13.5028	-13.5928	-13.6616	-13.5821	-13.594	-13.3054	-13.2237	-13.2628	-13.4981	-13.6099	-13.2658	0.146768	0.174876	0.000528089	0.00315697	0.111799	0.344188	1.08057	1.26944
b3632	rfaQ	chr	-	3805086,	3806121,	-14.2821	-14.4078	-14.2344	-14.0232	-14.1524	-14.1484	-14.636	-14.6904	-14.7515	-14.3085	-14.1074	-14.6923	0.0422305	0.06029	0.000545821	0.0032133	-0.201101	-0.584946	0.869886	0.666674
b1628	rsxB	chr	+	1704371,	1704950,	-15.0776	-15.1674	-15.0612	-14.8565	-14.9906	-14.7384	-15.7576	-15.8119	-15.9688	-15.102	-14.9053	-15.8458	0.0631075	0.084169	0.00057411	0.00326328	-0.196727	-0.940497	0.872528	0.521053
b3384	trpS	chr	-	3510655,	3511660,	-10.547	-10.5275	-10.5373	-10.5178	-10.485	-10.5139	-10.6884	-10.649	-10.6568	-10.5377	-10.5002	-10.6655	0.0722069	0.0942149	0.00062427	0.00343505	-0.0375701	-0.165298	0.974295	0.891744
b3183	obgE	chr	-	3328603,	3329776,	-12.1303	-12.1603	-12.1359	-12.1057	-12.0287	-12.0675	-12.4152	-12.4214	-12.4515	-12.1418	-12.0598	-12.4298	0.0618477	0.0826901	0.000763217	0.00386909	-0.0820073	-0.370074	0.944742	0.773743
b0337	codA	chr	+	355394,	356678,	-11.9643	-11.9704	-11.9652	-11.9135	-11.841	-11.916	-12.2265	-12.2731	-12.1809	-11.9666	-11.8759	-12.2235	0.0887578	0.111841	0.000770329	0.00386931	-0.0907216	-0.347674	0.939053	0.78585
b3728	pstS	chr	-	3908507,	3909548,	-12.8593	-12.872	-12.8751	-12.5792	-12.7258	-12.5236	-13.2852	-13.4401	-13.3898	-12.868	-12.6444	-13.3667	0.0492542	0.06827	0.000775852	0.00387926	-0.223656	-0.722317	0.856392	0.606123
b1002	agp	chr	+	1064807,	1066049,	-12.5971	-12.5413	-12.5911	-12.7054	-12.8369	-12.7047	-11.9457	-12.0143	-11.9733	-12.5766	-12.7718	-11.9755	0.0442789	0.0627237	0.000794785	0.00395322	0.195241	0.796346	1.14492	1.7367
b2014	yeeF	chr	-	2083727,	2085086,	-10.6686	-10.6655	-10.6412	-10.5124	-10.5133	-10.6626	-11.4372	-11.4831	-11.5069	-10.6597	-10.5342	-11.4752	0.192353	0.22032	0.000889211	0.00432092	-0.125446	-0.941004	0.91672	0.52087
b0054	imp	chr	-	54754,	57109,	-10.9087	-10.9061	-10.8715	-10.8172	-10.8302	-10.8936	-11.0986	-11.1487	-11.1505	-10.8971	-10.8351	-11.1316	0.165742	0.193483	0.000953668	0.00450331	-0.0620024	-0.296547	0.957934	0.814199
b3236	mdh	chr	-	3381351,	3382290,	-8.92882	-8.93097	-8.92877	-8.93156	-8.97984	-8.97177	-8.61131	-8.60322	-8.59787	-8.92952	-8.96234	-8.60413	0.168778	0.196818	0.000956846	0.00450331	0.0328227	0.358212	1.02301	1.28184
b2927	epd	chr	-	3070693,	3071713,	-13.6482	-13.542	-13.6344	-13.5538	-13.4729	-13.5074	-13.8903	-13.918	-14.0053	-13.6082	-13.5046	-13.9385	0.083592	0.106434	0.000983905	0.00452679	-0.103592	-0.433944	0.930713	0.740235
b4147	efp	chr	+	4373721,	4374288,	-9.00562	-9.00728	-9.05445	-8.91884	-8.89916	-8.98157	-9.34615	-9.30666	-9.32744	-9.02	-8.9177	-9.32776	0.0480188	0.0666421	0.00102646	0.00460002	-0.102294	-0.410059	0.931551	0.752593
b3626	rfaJ	chr	-	3799005,	3800022,	-14.2514	-14.3174	-14.3714	-14.0734	-13.9396	-14.2102	-15.0175	-14.8414	-15.0619	-14.3069	-14.0212	-14.9783	0.0749484	0.0972376	0.00105024	0.00463713	-0.285671	-0.957105	0.82036	0.515089
b0951	pqiB	chr	+	1012481,	1014122,	-13.3274	-13.3987	-13.401	-13.245	-13.2531	-13.3253	-13.7735	-13.7545	-13.6505	-13.3718	-13.2608	-13.7231	0.04515	0.0636284	0.0011594	0.0049397	-0.110931	-0.462254	0.92599	0.725851
b2299	yfcD	chr	-	2416655,	2417198,	-12.5132	-12.5795	-12.5342	-12.4438	-12.5068	-12.4165	-12.9322	-12.9633	-12.9464	-12.541	-12.4719	-12.9464	0.0647904	0.0857866	0.00125966	0.00518546	-0.0690858	-0.474513	0.953242	0.71971
b1914	uvrY	chr	-	1992726,	1993383,	-13.8671	-14.0097	-13.9897	-13.8824	-13.8427	-13.7769	-14.221	-14.2334	-14.1308	-13.9482	-13.8458	-14.1919	0.0967868	0.119618	0.00128114	0.00521507	-0.102344	-0.346049	0.931518	0.786736
b0211	mltD	chr	-	232596,	233955,	-11.2022	-11.2301	-11.1924	-11.2206	-11.1944	-11.1893	-11.9378	-11.8253	-11.854	-11.2086	-11.2023	-11.8741	0.672481	0.695341	0.00130519	0.00525752	-0.00624895	-0.671711	0.995678	0.627762
b0914	msbA	chr	+	965843,	967592,	-12.3495	-12.2198	-12.2304	-12.0069	-12.0597	-12.1585	-12.6415	-12.5517	-12.6183	-12.271	-12.0559	-12.6063	0.0348	0.0517043	0.00133774	0.00526916	-0.215075	-0.550365	0.861502	0.682848
b1867	yecD	chr	+	1948855,	1949422,	-13.6916	-13.5042	-13.5758	-13.5929	-13.6542	-13.6644	-13.1966	-13.2799	-13.3077	-13.5939	-13.6349	-13.2599	0.493956	0.523096	0.00135591	0.00527599	0.0410221	0.375048	1.02884	1.29688
b4032	malG	chr	-	4240648,	4241539,	-14.489	-14.4904	-14.4905	-14.4618	-14.4875	-14.7384	-12.6562	-12.593	-12.645	-14.4899	-14.5132	-12.6333	0.497333	0.526164	0.0013732	0.00527599	0.0233154	1.8799	1.01629	3.6805
b4481	rffT	chr	+	3975547,	3976627,	-14.9209	-14.8219	-14.61	-14.6457	-14.7172	-14.594	-15.0855	-14.999	-15.0053	-14.7933	-14.6743	-15.0309	0.285291	0.315098	0.00144809	0.00544898	-0.119006	-0.356636	0.920822	0.780984
b3643	rph	chr	-	3813885,	3814572,	-11.9764	-12.024	-11.8529	-11.7456	-11.7476	-11.8386	-12.0645	-12.0921	-12.1397	-11.9552	-11.7601	-12.099	0.0550203	0.075309	0.0015978	0.00585148	-0.195157	-0.33895	0.873478	0.790616
b3199	yrbK	chr	+	3340857,	3341433,	-14.3785	-14.3847	-14.3195	-14.3187	-14.2894	-14.1086	-15.0559	-14.8414	-14.8898	-14.3634	-14.2706	-14.9307	0.197291	0.22574	0.00171677	0.0061465	-0.0928053	-0.660102	0.937698	0.632834
b0861	artM	chr	-	900088,	900757,	-14.9904	-14.8428	-15.0803	-14.7921	-14.8855	-14.7847	-15.5511	-15.7359	-15.5358	-14.9639	-14.8385	-15.5976	0.149068	0.176655	0.00175311	0.00621249	-0.125359	-0.759029	0.916776	0.590894
b0887	cydD	chr	-	928418,	930185,	-13.362	-13.372	-13.2384	-13.2259	-13.1481	-13.3139	-13.7978	-13.6904	-13.6541	-13.3287	-13.1975	-13.7137	0.215352	0.244616	0.00174751	0.00621249	-0.131243	-0.516176	0.913044	0.699223
b3617	kbl	chr	-	3789377,	3790574,	-10.0884	-10.0421	-10.0514	-10.1282	-10.1043	-10.2037	-9.8653	-9.87763	-9.79685	-10.0623	-10.1266	-9.84415	0.0877599	0.111095	0.00177604	0.00624189	0.0643675	0.28247	1.04563	1.21628
b2925	fbaA	chr	-	3068186,	3069266,	-7.84259	-7.86747	-7.84286	-7.84172	-7.81433	-7.84603	-7.93062	-7.92272	-7.94738	-7.85089	-7.82812	-7.93421	0.261737	0.292451	0.00182051	0.00627378	-0.0227748	-0.106094	0.984338	0.9291
b4041	plsB	chr	-	4252065,	4254489,	-11.9963	-12.0087	-11.9596	-11.8871	-11.9598	-11.9267	-12.257	-12.3811	-12.338	-11.9898	-11.9302	-12.3215	0.0754648	0.0977916	0.00186031	0.00628715	-0.0595789	-0.391276	0.959544	0.762455
b3646	yicG	chr	+	3816896,	3817514,	-13.7578	-13.8411	-13.7103	-13.8974	-13.9123	-14.0229	-13.5341	-13.4591	-13.4963	-13.7709	-13.9231	-13.4982	0.0338871	0.0507611	0.00189688	0.00639103	0.152199	0.424937	1.11126	1.34251
b1795	yeaQ	chr	-	1877030,	1877279,	-14.182	-14.1284	-14.0683	-14.1298	-14.0247	-14.1484	-14.6433	-14.655	-14.6042	-14.1309	-14.0771	-14.6327	0.644305	0.669368	0.00193306	0.00649296	-0.0537644	-0.555564	0.963419	0.680391
b1099	holB	chr	+	1154984,	1155989,	-14.9802	-15.2029	-15.0565	-14.7781	-14.8288	-14.8164	-15.3827	-15.2799	-15.4081	-15.0731	-14.8098	-15.3604	0.0467591	0.0655109	0.00195884	0.00654481	-0.263228	-0.550551	0.833221	0.682759
b2235	nrdB	chr	+	2345405,	2346536,	-11.2524	-11.2646	-11.2709	-11.164	-11.1714	-11.0952	-11.3607	-11.4122	-11.3997	-11.2617	-11.1574	-11.3896	0.0338743	0.0507611	0.00202933	0.00667769	-0.104331	-0.232215	0.930236	0.851327
b0853	ybjN	chr	+	892179,	892656,	-13.4771	-13.4078	-13.4313	-13.2789	-13.4022	-13.2639	-13.9078	-13.8514	-13.8478	-13.4406	-13.339	-13.8696	0.0882432	0.111449	0.00203685	0.00667769	-0.101585	-0.530527	0.932009	0.692302
b4469	ygiQ	chr	-	3156948,	3159168,	-13.0758	-13.074	-13.1265	-12.955	-12.9086	-13.1135	-13.6433	-13.7313	-13.7438	-13.0895	-12.9529	-13.7043	0.245116	0.276418	0.00205596	0.00670023	-0.136635	-0.751383	0.909638	0.594034
b0801	ybiC	chr	+	835573,	836659,	-14.7307	-14.6682	-14.767	-14.8347	-14.7476	-14.7691	-14.2824	-14.3002	-14.146	-14.7198	-14.7794	-14.2375	0.18845	0.216302	0.00206372	0.00670556	0.0595799	0.541876	1.04216	1.45586
b3726	pstA	chr	-	3906571,	3907462,	-15.0776	-14.8711	-14.983	-14.7575	-14.7302	-14.882	-15.2767	-15.2012	-15.3838	-14.9792	-14.7609	-15.2906	0.0724536	0.0942883	0.00227484	0.00719926	-0.21826	-0.529672	0.859601	0.692712
b3401	hslO	chr	+	3527795,	3528674,	-12.1219	-12.0766	-12.1352	-12.0274	-12.0706	-12.0771	-12.2682	-12.2598	-12.3351	-12.1104	-12.057	-12.2891	0.0900169	0.11265	0.00235408	0.00738705	-0.0534632	-0.232129	0.96362	0.851378
b1215	kdsA	chr	+	1267387,	1268242,	-9.99874	-9.93265	-9.95236	-9.94403	-9.95408	-9.89201	-10.1195	-10.1292	-10.0867	-9.96319	-9.94135	-10.1106	0.319064	0.349375	0.00245368	0.00763288	-0.0218385	-0.169223	0.984977	0.889321
b4054	tyrB	chr	+	4265136,	4266330,	-12.9727	-12.9266	-13.0436	-13.1079	-13.0274	-13.0843	-12.7108	-12.8241	-12.7809	-12.9769	-13.0622	-12.7684	0.0985923	0.121438	0.00255474	0.00783598	0.0853012	0.293818	1.06091	1.22588
b2036	glf	chr	-	2105249,	2106353,	-10.1754	-10.2096	-10.1772	-10.1488	-10.1412	-9.97848	-10.718	-10.7961	-10.7725	-10.1872	-10.1183	-10.7601	0.216672	0.245861	0.00255215	0.00783598	-0.0688761	-0.641731	0.95338	0.640944
b4373	rimI	chr	+	4606207,	4606654,	-15.1251	-15.163	-15.2371	-15.0191	-14.8664	-15.0229	-15.5789	-15.5135	-15.3838	-15.1691	-14.9386	-15.4878	0.0362464	0.0534184	0.00257347	0.00787136	-0.23049	-0.54923	0.852345	0.683385
b0847	ybjL	chr	-	887356,	889042,	-13.9904	-14.0556	-13.9875	-13.6648	-13.677	-13.8904	-14.4775	-14.392	-14.5358	-14.0109	-13.7026	-14.4718	0.0572974	0.0780356	0.0026585	0.00802605	-0.308313	-0.769256	0.807586	0.58672
b0643	ybeL	chr	+	674240,	674723,	-13.8985	-13.8498	-13.9237	-13.5419	-13.4985	-13.8005	-14.6581	-14.414	-14.36	-13.8892	-13.5543	-14.4741	0.0920851	0.114899	0.00278783	0.0082061	-0.334918	-0.91979	0.792829	0.528586
b3634	coaD	chr	+	3807847,	3808327,	-14.1214	-14.2301	-14.144	-14.3858	-14.5359	-14.2971	-13.707	-13.7499	-13.8602	-14.1633	-14.4473	-13.7726	0.0557905	0.076078	0.00284512	0.00832997	0.284004	0.674643	1.21757	1.5962
b3625	rfaY	chr	-	3798289,	3798988,	-14.2312	-14.1984	-14.3366	-14.1932	-14.1237	-13.8571	-14.9616	-15.151	-14.9869	-14.2494	-14.103	-15.0242	0.184419	0.211986	0.00291234	0.00843653	-0.146375	-0.921196	0.903518	0.528071
b3260	dusB	chr	+	3408301,	3409267,	-14.2054	-14.0495	-14.1641	-14.0692	-14.1729	-13.8736	-15.484	-15.3348	-15.8644	-14.1402	-14.09	-15.5584	0.38265	0.411998	0.0029699	0.00849096	-0.0501499	-1.46842	0.965836	0.361377
b0345	lacI	chr	-	365651,	366734,	-15.182	-15.1895	-14.9696	-14.9867	-14.9497	-15.0415	-15.1779	-15.24	-15.2463	-15.1203	-14.9753	-15.2202	0.229298	0.259114	0.00305926	0.00865603	-0.144953	-0.244883	0.904409	0.843884
b3999	yjaG	chr	+	4197526,	4198117,	-13.6165	-13.6406	-13.5877	-13.5627	-13.4911	-13.4565	-13.8602	-13.8119	-13.8436	-13.6161	-13.5094	-13.8399	0.0514592	0.0712363	0.00307363	0.00867428	-0.106731	-0.330549	0.92869	0.795234
b1227	narI	chr	+	1285071,	1285749,	-14.8702	-14.8048	-14.5162	-14.8936	-14.8569	-15.1384	-14.1207	-14.1758	-14.3423	-14.7392	-14.9078	-14.2126	0.175283	0.203753	0.00320495	0.00888462	0.168686	0.695254	1.12403	1.61917
b3618	htrL	chr	-	3790848,	3791706,	-14.1514	-14.1499	-14.102	-13.8456	-13.8759	-13.6359	-14.7108	-15.0906	-14.7438	-14.1366	-13.8277	-14.8253	0.0386689	0.0561571	0.0034433	0.00933271	-0.308891	-0.997636	0.807262	0.50082
b0215	dnaQ	chr	+	236066,	236798,	-13.4771	-13.6284	-13.5049	-13.4152	-13.423	-13.3027	-13.8433	-13.7925	-13.8231	-13.5339	-13.4019	-13.821	0.0630501	0.084169	0.00350399	0.00947376	-0.131983	-0.419079	0.912577	0.747902
b3492	yhiN	chr	-	3634230,	3635433,	-14.3114	-14.4026	-14.4282	-14.1079	-14.3347	-14.2208	-14.7031	-14.8615	-14.9598	-14.3743	-14.2384	-14.837	0.119155	0.14449	0.00355527	0.00952136	-0.135947	-0.598647	0.910073	0.660373
b3385	gph	chr	-	3511652,	3512411,	-12.9033	-12.9266	-12.824	-12.9125	-12.905	-12.7499	-13.2967	-13.3383	-13.3959	-12.8877	-12.8833	-13.3437	0.668306	0.692332	0.00356821	0.00952973	-0.00440036	-0.460322	0.996955	0.726824
b2608	rimM	chr	-	2743391,	2743940,	-11.852	-11.7636	-11.7242	-11.7439	-11.7427	-11.6844	-12.3229	-12.1602	-12.2006	-11.785	-11.7343	-12.2298	0.277512	0.306993	0.00409512	0.0105015	-0.0507354	-0.495516	0.965444	0.709308
b2069	yegD	chr	+	2145697,	2147050,	-14.8578	-14.8855	-14.8463	-14.5717	-14.4802	-14.7537	-15.3229	-15.2531	-15.3959	-14.8636	-14.5484	-15.3271	0.0801003	0.102705	0.00416888	0.0105915	-0.315229	-0.778743	0.803723	0.582875
b1626	ydgK	chr	+	1703273,	1703714,	-14.6509	-14.6901	-14.767	-14.6021	-14.3919	-14.5534	-15.3346	-15.2799	-15.2907	-14.6964	-14.4827	-15.3027	0.0791947	0.101902	0.00420472	0.0106306	-0.21374	-0.819966	0.862299	0.566455
b4571	wbbL	chr	-	2099419,	2101413,	-12.1224	-12.1575	-12.0935	-12.0788	-12.0082	-11.9053	-12.3406	-12.4196	-12.439	-12.1256	-12.0154	-12.3982	0.114782	0.139496	0.00481213	0.0118411	-0.110184	-0.382809	0.92647	0.766943
b1243	oppA	chr	+	1299205,	1300837,	-9.85402	-9.86998	-9.85767	-9.76004	-9.79268	-9.71582	-9.95052	-9.97284	-9.98123	-9.86036	-9.77011	-9.96796	0.0374883	0.054806	0.00486971	0.011876	-0.0902497	-0.197854	0.93936	0.871847
b1825	yebO	chr	-	1906284,	1906572,	-14.9372	-14.8082	-14.9432	-14.8936	-14.7608	-14.8653	-15.7262	-15.8315	-16.0812	-14.8947	-14.8193	-15.8756	0.399934	0.428501	0.00485315	0.011876	-0.0753204	-1.05622	0.949131	0.480891
b2630	rnlA	chr	+	2763939,	2765013,	-14.2904	-14.3272	-14.3195	-14.1566	-14.1265	-14.2422	-14.3889	-14.4591	-14.4642	-14.3109	-14.1532	-14.4359	0.0471519	0.065837	0.00491601	0.0119623	-0.157665	-0.282694	0.896475	0.822054
b2916	argP	chr	+	3057774,	3058668,	-14.2453	-14.2578	-14.144	-14.3441	-14.3119	-14.3196	-13.8688	-13.8464	-13.9688	-14.2196	-14.3237	-13.8967	0.0845309	0.107504	0.00508175	0.0121649	0.10412	0.426977	1.07484	1.34441
b1961	dcm	chr	-	2028922,	2030341,	-14.5427	-14.5722	-14.481	-14.1566	-14.2547	-14.4135	-14.8731	-14.892	-14.7133	-14.5344	-14.2431	-14.8195	0.0617979	0.0826901	0.00522702	0.012362	-0.291225	-0.576405	0.817208	0.670633
b2532	trmJ	chr	-	2660604,	2661345,	-12.3183	-12.2814	-12.3714	-12.251	-12.2469	-12.2155	-12.5341	-12.4572	-12.5543	-12.3208	-12.2435	-12.518	0.0644625	0.0855594	0.00561978	0.0131208	-0.0772596	-0.274458	0.947856	0.826761
b0394	mak	chr	+	409367,	410276,	-14.1686	-14.1608	-14.149	-14.2643	-14.2862	-14.0988	-13.688	-13.8564	-13.819	-14.1603	-14.2496	-13.7824	0.43722	0.466623	0.00571633	0.0132614	0.0892064	0.467111	1.06378	1.38234
b3629	rfaS	chr	-	3802203,	3803139,	-15.7709	-16.0947	-15.6918	-15.4786	-15.6833	-15.1384	-17.0955	-16.7359	-16.4578	-15.846	-15.521	-16.7381	0.109865	0.133966	0.00582801	0.0134351	-0.32502	-1.21708	0.798287	0.430152
b1834	yebT	chr	+	1915533,	1918167,	-14.4054	-14.4605	-14.4528	-14.4071	-14.2894	-14.2422	-14.6581	-14.7359	-14.5972	-14.4371	-14.3203	-14.6583	0.110351	0.13441	0.00581955	0.0134351	-0.116745	-0.337976	0.922266	0.79115
b0683	fur	chr	-	709422,	709869,	-11.976	-11.9795	-11.9824	-11.722	-11.8218	-11.5719	-12.3585	-12.2715	-12.3703	-11.979	-11.7487	-12.3364	0.063516	0.0846108	0.00592024	0.013539	-0.230357	-0.587732	0.852424	0.665388
b1091	fabH	chr	+	1147981,	1148935,	-10.7956	-10.8174	-10.8128	-10.7108	-10.7304	-10.7808	-11.008	-10.9056	-10.9892	-10.8078	-10.7312	-10.9705	0.0711823	0.0933468	0.00598843	0.0136327	-0.0765898	-0.239296	0.948297	0.847159
b2174	yeiU	chr	+	2266875,	2267589,	-13.0875	-13.1795	-13.1253	-13.0884	-12.916	-12.8325	-13.8349	-13.7877	-13.8069	-13.1284	-12.9582	-13.8109	0.121125	0.146717	0.00614503	0.0139313	-0.17026	-0.852749	0.888683	0.553728
b4323	uxuB	chr	+	4550923,	4552384,	-13.7622	-13.7447	-13.6992	-13.8275	-13.9321	-14.2102	-12.736	-12.6859	-12.7574	-13.7381	-13.9334	-12.7285	0.152278	0.179875	0.00658517	0.0147459	0.19535	1.2049	1.145	2.30522
b2038	rfbC	chr	-	2107604,	2108162,	-11.6913	-11.7333	-11.6973	-11.6552	-11.7167	-11.455	-12.291	-12.3775	-12.2949	-11.7069	-11.6545	-12.3174	0.338763	0.368002	0.00661539	0.0147834	-0.0524135	-0.662934	0.964322	0.631592
b0864	artP	chr	-	902228,	902957,	-14.0143	-13.9824	-14.0518	-13.7816	-13.8195	-13.6148	-14.458	-14.4744	-14.4833	-14.0142	-13.7747	-14.4718	0.0375514	0.054825	0.00667128	0.0148658	-0.239438	-0.697107	0.847075	0.616808
b3092	uxaC	chr	-	3241350,	3242763,	-13.755	-13.6451	-13.7158	-13.9087	-14.0036	-14.1998	-13.2265	-13.3278	-13.322	-13.7065	-13.9981	-13.2896	0.0468557	0.0655261	0.00667944	0.0148658	0.291611	0.708491	1.22401	1.63409
b0433	ampG	chr	-	451293,	452769,	-14.5377	-14.5578	-14.401	-14.4125	-14.338	-14.4881	-14.8391	-15.1144	-15.0428	-14.5037	-14.3842	-14.988	0.261291	0.292251	0.00791378	0.0168264	-0.119492	-0.603858	0.920512	0.657992
b0699	ybfA	chr	+	728356,	728563,	-12.9735	-12.9999	-13.0791	-13.3991	-13.3563	-13.1535	-12.7998	-12.8946	-12.7246	-13.0119	-13.3382	-12.7995	0.047815	0.0665279	0.00824578	0.0173637	0.326304	0.538723	1.2538	1.45269
b4346	mcrB	chr	-	4575980,	4577360,	-13.9001	-13.9091	-13.8321	-13.8529	-13.8264	-13.7009	-14.3766	-14.6994	-14.439	-13.8832	-13.8158	-14.4878	0.197745	0.226024	0.00856901	0.0178385	-0.0674691	-0.67206	0.954311	0.62761
b0091	murC	chr	+	100764,	102240,	-12.6916	-12.6917	-12.7327	-12.4111	-12.4811	-12.5872	-12.7635	-12.7949	-12.9005	-12.7033	-12.4724	-12.8203	0.0455413	0.0640974	0.0086001	0.0178693	-0.230945	-0.347922	0.852077	0.785715
b4151	frdD	chr	-	4377029,	4377389,	-13.7265	-13.7252	-13.7271	-14.1657	-14.0706	-13.9246	-13.5206	-13.4439	-13.461	-13.7262	-14.0786	-13.4764	0.0429328	0.0611332	0.00878943	0.0181982	0.352352	0.602177	1.27664	1.51801
b1340	ydaL	chr	+	1404002,	1404566,	-15.4443	-15.4313	-15.413	-15.339	-15.0816	-15.0988	-15.7418	-15.5951	-15.7671	-15.431	-15.1653	-15.7056	0.0892162	0.112289	0.0091069	0.0186743	-0.265641	-0.540319	0.831829	0.687619
b1807	yeaZ	chr	-	1888595,	1889291,	-13.2514	-13.3333	-13.2874	-12.7287	-12.8023	-13.0322	-13.5859	-13.5335	-13.461	-13.2885	-12.8086	-13.5251	0.0342696	0.0511939	0.00980343	0.0199902	-0.479877	-0.716412	0.717039	0.608609
b0892	rarA	chr	+	937216,	938560,	-14.5602	-14.552	-14.4969	-14.5478	-14.3748	-14.3658	-14.8903	-14.9445	-14.9331	-14.5391	-14.429	-14.9214	0.205998	0.234722	0.00984274	0.0199959	-0.110128	-0.492407	0.926506	0.710838
b2611	ypjD	chr	+	2745983,	2746775,	-14.3675	-14.4472	-14.3252	-14.1702	-14.03	-14.253	-14.6507	-14.6904	-14.6112	-14.381	-14.1074	-14.648	0.0515808	0.0713144	0.00989534	0.0200656	-0.273663	-0.540632	0.827216	0.68747
b4173	hflX	chr	+	4398694,	4399975,	-13.4712	-13.4619	-13.2915	-13.1365	-13.1626	-13.2422	-13.3858	-13.5497	-13.493	-13.4144	-13.1653	-13.4707	0.0398427	0.057405	0.00993479	0.0200899	-0.249103	-0.305387	0.841419	0.809225
b1476	fdnI	chr	+	1549361,	1550015,	-15.3199	-15.2119	-15.2695	-15.8347	-15.5246	-15.8488	-15.1055	-14.9339	-15.091	-15.2688	-15.6678	-15.0477	0.0383609	0.0557838	0.0101036	0.0203746	0.398982	0.620075	1.31858	1.53696
b2965	speC	chr	-	3105041,	3107177,	-13.6152	-13.6119	-13.5843	-13.5807	-13.3714	-13.5269	-14.1886	-13.9233	-13.9331	-13.6052	-13.4611	-14.0143	0.217342	0.246111	0.0103811	0.0207432	-0.14406	-0.553116	0.904969	0.681547
b3633	waaA	chr	+	3806562,	3807840,	-14.2173	-14.1984	-14.144	-14.0949	-14.1495	-14.2859	-14.8475	-14.7734	-14.5492	-14.1897	-14.1502	-14.7137	0.884204	0.894001	0.0104975	0.0208545	-0.0394391	-0.563432	0.973033	0.67669
b3084	rlmG	chr	-	3232760,	3233897,	-14.0403	-14.0116	-13.963	-13.6051	-13.6157	-13.8245	-14.3054	-14.2598	-14.2463	-14.0083	-13.6412	-14.2707	0.0356759	0.0527907	0.010737	0.0212221	-0.367053	-0.629471	0.775365	0.646413
b0722	sdhD	chr	+	754782,	755130,	-13.0651	-12.9738	-13.0308	-13.0628	-13.0141	-13.3835	-12.202	-12.1235	-12.19	-13.0244	-13.08	-12.1742	0.378063	0.40746	0.0109918	0.0215698	0.0556238	0.905798	1.03931	1.87358
b0863	artI	chr	-	901479,	902211,	-11.4876	-11.4254	-11.4482	-11.3512	-11.4087	-11.3805	-11.9731	-12.2351	-12.0134	-11.4553	-11.3851	-12.0605	0.0407081	0.0584978	0.0110249	0.0215962	-0.0702869	-0.675439	0.952449	0.626142
b3590	selB	chr	-	3756039,	3757884,	-12.9685	-12.8909	-12.9184	-12.8529	-12.8735	-12.942	-13.1258	-13.0383	-13.0357	-12.9279	-12.8765	-13.0673	0.36064	0.391378	0.0116898	0.0224567	-0.0514436	-0.190849	0.96497	0.87609
b0103	coaE	chr	-	112598,	113219,	-15.5011	-15.5868	-15.4252	-15.4125	-15.3681	-15.6936	-16.0175	-16.0441	-16.36	-15.5064	-15.4271	-16.1386	0.915708	0.919066	0.0125196	0.0238003	-0.0792944	-0.711456	0.94652	0.610703
b3631	rfaG	chr	-	3803965,	3805090,	-14.1743	-14.0781	-14.1069	-14.1566	-14.1265	-13.942	-14.5649	-14.6035	-14.5358	-14.1224	-14.1074	-14.5657	0.587456	0.61205	0.0126415	0.0239903	-0.0150048	-0.458313	0.989653	0.727837
b3867	hemN	chr	+	4050067,	4051441,	-13.2904	-13.3235	-13.3395	-13.2912	-13.1818	-13.4441	-13.7536	-13.8564	-13.7593	-13.3153	-13.2544	-13.7853	0.889119	0.897313	0.0128602	0.0243632	-0.0609554	-0.530882	0.958629	0.692132
b0023	rpsT	chr	-	20814,	21078,	-8.25393	-8.25475	-8.28357	-8.33018	-8.31801	-7.99695	-8.94698	-9.04907	-9.02919	-8.26263	-8.2695	-9.00565	0.697608	0.719285	0.0130961	0.0247246	0.00686722	-0.736153	1.00477	0.600338
b3935	priA	chr	-	4122634,	4124833,	-15.1976	-15.1284	-15.1241	-15.1123	-15.1553	-15.0603	-15.8224	-15.5619	-15.6042	-15.1531	-15.1264	-15.6635	0.326473	0.356064	0.0133014	0.0249401	-0.0266738	-0.537067	0.981681	0.689171
b2027	cld	chr	-	2095344,	2096325,	-11.103	-11.0856	-11.08	-10.9394	-10.9729	-10.7945	-11.1182	-11.269	-11.2463	-11.0906	-10.9339	-11.2067	0.0735775	0.0955722	0.0134524	0.0251305	-0.156675	-0.272762	0.89709	0.827733
b3888	yiiD	chr	+	4075471,	4076461,	-14.3741	-14.3444	-14.1743	-14.3596	-14.2056	-14.4256	-13.948	-13.9233	-13.8602	-14.3045	-14.287	-13.909	0.735329	0.756043	0.0135241	0.025164	-0.0174837	0.377988	0.987954	1.29953
b3486	rbbA	chr	-	3624825,	3627561,	-14.3263	-14.3619	-14.3139	-14.507	-14.5171	-14.7084	-14.2598	-14.0441	-14.2354	-14.3345	-14.5405	-14.1844	0.059344	0.0803235	0.0136774	0.0253414	0.206038	0.356099	1.15352	1.27996
b1702	pps	chr	-	1782757,	1785136,	-11.3522	-11.3165	-11.3157	-11.325	-11.2345	-11.3439	-11.5572	-11.5537	-11.5739	-11.3298	-11.2802	-11.5621	0.516439	0.543229	0.014036	0.0258309	-0.0495499	-0.281863	0.966238	0.822528
b3485	yhhJ	chr	-	3623701,	3624829,	-15.6323	-15.6164	-15.5001	-15.6712	-15.3953	-15.7847	-15.0462	-15.0441	-14.8313	-15.588	-15.5366	-14.9655	0.802527	0.822045	0.0140742	0.0258578	-0.0514554	0.571104	0.964962	1.48566
b3912	cpxR	chr	-	4102994,	4103693,	-12.2282	-12.2324	-12.2205	-12.2342	-12.1781	-12.2859	-12.0402	-12.0965	-11.9767	-12.2274	-12.2123	-12.0334	0.872115	0.885047	0.0141692	0.0259887	-0.0150901	0.178874	0.989595	1.132
b2262	menB	chr	-	2373983,	2374841,	-11.1071	-11.0846	-11.0761	-11.0212	-10.962	-11.0783	-11.2326	-11.2196	-11.2614	-11.0907	-10.9984	-11.2389	0.169861	0.197793	0.0143221	0.0260659	-0.0922499	-0.240511	0.938059	0.846446
b4349	hsdM	chr	-	4579481,	4581071,	-12.2529	-12.3077	-12.1937	-12.131	-12.1936	-12.0771	-12.3346	-12.3649	-12.2642	-12.2535	-12.1547	-12.3179	0.0671819	0.0885248	0.0145405	0.0263608	-0.0987183	-0.163158	0.933862	0.893068
b0181	lpxA	chr	+	202559,	203348,	-11.9565	-11.9599	-12.0442	-11.9326	-11.9203	-12.0795	-12.3421	-12.2985	-12.2781	-11.9822	-11.947	-12.3062	0.88254	0.893144	0.014536	0.0263608	-0.0351867	-0.359168	0.975905	0.779614
b0307	ykgF	chr	+	321561,	322989,	-14.142	-14.0475	-14.0707	-14.924	-14.7129	-14.4135	-13.484	-13.4899	-13.5325	-14.0895	-14.7292	-13.5028	0.0518784	0.0716354	0.0145998	0.0264244	0.639665	1.22638	1.55797	2.33979
b2266	elaB	chr	-	2378743,	2379049,	-14.4167	-14.4795	-14.4559	-14.0607	-14.2484	-14.2749	-14.6072	-14.4978	-14.6112	-14.4486	-14.1867	-14.5754	0.0542906	0.07459	0.0148902	0.026736	-0.261883	-0.388747	0.833999	0.763793
b3612	gpmM	chr	+	3783282,	3784827,	-9.56748	-9.56913	-9.60567	-9.46577	-9.47767	-9.54839	-9.66873	-9.59638	-9.64752	-9.57887	-9.48394	-9.63954	0.0647249	0.0857866	0.0148847	0.026736	-0.09493	-0.155601	0.936318	0.897758
b1550	gnsB	chr	-	1635632,	1635806,	-14.383	-14.3053	-14.4374	-14.2789	-14.2894	-13.9954	-14.636	-14.8315	-14.6686	-14.3718	-14.2384	-14.703	0.181629	0.209572	0.0148655	0.026736	-0.133424	-0.464606	0.911665	0.724669
b1805	fadD	chr	-	1886084,	1887770,	-13.9065	-13.9805	-13.9763	-13.8602	-13.7237	-13.916	-14.3229	-14.1571	-14.1009	-13.9507	-13.7957	-14.1919	0.156206	0.183526	0.0154903	0.0275523	-0.154976	-0.396173	0.898147	0.759871
b1277	ribA	chr	-	1336593,	1337184,	-13.0848	-13.1348	-13.0791	-12.8805	-12.8916	-12.6608	-13.149	-13.1821	-13.3049	-13.0996	-12.8513	-13.2126	0.0548701	0.0751975	0.015736	0.0279269	-0.248316	-0.361306	0.841879	0.77846
b2295	yfbV	chr	-	2410698,	2411154,	-14.3697	-14.3126	-14.2777	-14.1298	-14.1847	-13.9332	-14.5511	-14.7734	-14.9961	-14.3238	-14.1264	-14.7629	0.0765036	0.0987526	0.0158668	0.0281134	-0.197411	-0.636417	0.872114	0.643309
b3146	yraL	chr	-	3290496,	3291357,	-14.8302	-14.7912	-14.8504	-14.3805	-14.4442	-14.6644	-14.9616	-15.0671	-14.8231	-14.8228	-14.4528	-14.9401	0.0574003	0.0780787	0.0162567	0.0286652	-0.370034	-0.487297	0.773765	0.71336
b0068	tbpA	chr	-	74496,	75480,	-14.7138	-14.6933	-14.6486	-14.8275	-14.7215	-14.4628	-15.2654	-15.0788	-15.3718	-14.688	-14.7136	-15.2433	0.905868	0.910859	0.0163216	0.0286873	0.025569	-0.529672	1.01788	0.692712
b1124	potC	chr	-	1182048,	1182843,	-13.4408	-13.3732	-13.3323	-13.3086	-13.423	-13.3835	-13.6179	-13.5056	-13.6361	-13.3866	-13.378	-13.5902	0.832473	0.851128	0.0164148	0.0287587	-0.0085461	-0.212141	0.994094	0.863255
b3202	rpoN	chr	+	3342738,	3344172,	-13.3686	-13.2969	-13.3817	-13.2426	-13.2941	-13.0891	-13.6036	-13.5742	-13.5192	-13.348	-13.2447	-13.5645	0.136616	0.164029	0.0174952	0.0305051	-0.103283	-0.319743	0.930912	0.801213
b1826	mgrB	chr	-	1906646,	1906790,	-14.8671	-14.662	-14.6239	-14.4507	-14.4621	-14.0509	-14.9435	-15.151	-15.1009	-14.7251	-14.3895	-15.0579	0.0795755	0.102218	0.0178995	0.0310681	-0.335663	-0.66846	0.79242	0.629178
b3930	menA	chr	-	4117445,	4118372,	-13.5639	-13.5083	-13.559	-13.3314	-13.43	-13.6078	-13.8731	-13.9552	-13.8029	-13.5438	-13.4208	-13.8711	0.393826	0.423199	0.018467	0.0318447	-0.123018	-0.450266	0.918265	0.731908
b0460	hha	chr	-	479313,	479532,	-14.7279	-14.9633	-14.8834	-14.8565	-14.8569	-14.6501	-15.232	-15.2664	-15.2139	-14.8472	-14.8241	-15.2356	0.510643	0.538165	0.0186684	0.0319904	-0.0230428	-0.411437	0.984155	0.751874
b1667	ydhR	chr	+	1744723,	1745029,	-13.5071	-13.4326	-13.4873	-13.1321	-13.1714	-12.8164	-13.8308	-13.8414	-13.815	-13.4763	-13.1001	-13.8282	0.0555753	0.0758872	0.0192814	0.0328777	-0.376177	-0.728123	0.770476	0.603689
b0635	mrdA	chr	-	665538,	667440,	-13.8702	-14.0295	-13.9216	-13.924	-14.001	-13.8653	-14.6072	-14.4899	-14.907	-13.9363	-13.9542	-14.6687	0.874721	0.88687	0.0194383	0.0330512	0.0179198	-0.714484	1.0125	0.609423
b0868	ybjS	chr	-	904962,	905976,	-14.9209	-15.0375	-14.8101	-14.6457	-14.6542	-15.0045	-15.3827	-15.4667	-15.2139	-14.9252	-14.6982	-15.3437	0.332583	0.362006	0.0195588	0.0331018	-0.226975	-0.645469	0.854425	0.639285
b2785	rumA	chr	-	2911720,	2913022,	-14.4748	-14.4313	-14.4313	-14.5478	-14.3816	-14.3775	-15.1569	-15.4515	-14.9778	-14.4477	-14.4344	-15.1677	0.87595	0.887295	0.0197384	0.0333543	-0.0132619	-0.733316	0.99085	0.60152
b0393	rdgC	chr	-	408331,	409243,	-12.4968	-12.5435	-12.4025	-12.4192	-12.3505	-12.3083	-12.5806	-12.5619	-12.5696	-12.4842	-12.3666	-12.5712	0.0856851	0.108594	0.0202065	0.0338513	-0.117589	-0.204524	0.921727	0.867825
b2515	ispG	chr	-	2638707,	2639826,	-12.15	-12.1718	-12.1673	-12.0492	-12.0796	-12.1509	-12.2852	-12.2866	-12.1927	-12.1622	-12.0796	-12.252	0.14099	0.168725	0.0203058	0.0339463	-0.082534	-0.172407	0.944397	0.887361
b1739	osmE	chr	-	1819941,	1820280,	-12.878	-12.8711	-12.9227	-13.0356	-12.9185	-12.9376	-12.6861	-12.7499	-12.8313	-12.8883	-12.9595	-12.7552	0.169975	0.197793	0.0207253	0.0345948	0.0711329	0.204235	1.05054	1.15208
b0674	asnB	chr	-	696735,	698400,	-14.0615	-14.1178	-14.1515	-14.2546	-14.358	-14.4754	-14.1413	-14.0613	-13.9643	-14.1055	-14.339	-14.0528	0.0430299	0.0611919	0.0215805	0.0359128	0.233503	0.286204	1.17569	1.21943
b1475	fdnH	chr	+	1548484,	1549369,	-14.4653	-14.4931	-14.4221	-14.8492	-15.2147	-15.3775	-14.1207	-14.1205	-14.091	-14.4619	-15.103	-14.11	0.0458493	0.064448	0.0216137	0.0359135	0.641105	0.993006	1.55952	1.99033
b3742	mioC	chr	-	3924034,	3924478,	-12.9153	-12.8125	-12.8887	-12.7005	-12.7334	-12.5074	-13.1182	-13.0936	-13.0837	-12.8728	-12.6867	-13.0986	0.0685014	0.0901551	0.0216627	0.0359404	-0.186072	-0.411854	0.878996	0.751657
b1308	pspE	chr	+	1367712,	1368027,	-11.8148	-11.7929	-11.8824	-12.16	-12.1619	-11.9203	-11.5912	-11.6826	-11.6843	-11.8264	-12.1228	-11.6506	0.0765671	0.0987526	0.0221377	0.0366175	0.296329	0.472166	1.22802	1.38719
b4484	cpxP	chr	+	4103842,	4104343,	-15.7825	-15.9146	-16.0193	-16.955	-16.6501	-16.1384	-15.1258	-15.24	-15.0715	-15.891	-16.6507	-15.1386	0.0953607	0.118122	0.0226191	0.0371891	0.759697	1.51215	1.69314	2.85234
b0657	lnt	chr	-	688565,	690104,	-14.3986	-14.4767	-14.2999	-14.0191	-14.2177	-14.5139	-14.98	-14.8119	-15.0619	-14.3946	-14.1867	-14.9559	0.434308	0.464421	0.0228549	0.0375204	-0.207961	-0.769213	0.86576	0.586738
b1250	kch	chr	-	1307039,	1308293,	-15.8182	-15.8855	-15.6773	-15.4673	-15.7001	-15.5269	-15.8731	-15.9339	-15.9688	-15.7978	-15.5925	-15.9245	0.0705673	0.0927625	0.0232728	0.0380923	-0.205257	-0.331942	0.867384	0.794466
b3425	glpE	chr	-	3559519,	3559846,	-14.9702	-15.1456	-14.9389	-14.5717	-14.6917	-14.9332	-15.2101	-15.151	-15.3482	-15.0168	-14.6829	-15.2394	0.0970404	0.119796	0.0236453	0.0385445	-0.333872	-0.556496	0.793404	0.679952
b3035	tolC	chr	+	3176136,	3177618,	-9.35505	-9.36409	-9.37101	-9.32756	-9.35987	-9.37311	-9.39772	-9.42817	-9.44815	-9.36262	-9.35094	-9.42448	0.54926	0.57499	0.0236899	0.0385445	-0.0116802	-0.0735444	0.991937	0.9503
b0712	ybgK	chr	+	743465,	744398,	-14.9735	-14.9557	-14.8627	-15.2118	-15.43	-15.6359	-14.8224	-14.8119	-14.6908	-14.9351	-15.3806	-14.7712	0.0472583	0.065837	0.0238258	0.0386507	0.44559	0.60943	1.36187	1.52566
b4498	gatR	chr	-	2167716,	2169751,	-15.0246	-15.0455	-15.154	-15.4018	-15.6419	-15.2859	-14.8224	-14.9128	-14.8313	-15.0676	-15.5017	-14.8517	0.0576805	0.0783625	0.0238053	0.0386507	0.434104	0.649999	1.35107	1.56917
b1812	pabB	chr	+	1892828,	1894190,	-14.9937	-14.8569	-14.7747	-14.6648	-14.6624	-14.5401	-14.8308	-14.7829	-14.9509	-14.8826	-14.6444	-14.8576	0.0370226	0.0542701	0.0243884	0.0393418	-0.238248	-0.213246	0.847774	0.862594
b3400	hslR	chr	+	3527369,	3527771,	-15.1476	-15.2029	-15.2532	-15.0607	-15.3347	-14.882	-15.5375	-15.6638	-15.8813	-15.1956	-15.1653	-15.6897	0.498289	0.526237	0.0247949	0.0398685	-0.0303008	-0.524378	0.979216	0.695259
b0383	phoA	chr	+	400970,	402386,	-15.7943	-15.6589	-15.9216	-15.6206	-15.7697	-15.882	-16.0175	-16.24	-16.0812	-15.7821	-15.7337	-16.103	0.765662	0.785755	0.0248326	0.0398705	-0.0483631	-0.369267	0.967033	0.774176
b0811	glnH	chr	-	846480,	847227,	-11.9589	-11.9599	-11.9591	-12.0305	-12.0796	-11.9954	-11.8806	-11.8652	-11.9587	-11.9593	-12.0503	-11.9032	0.0898643	0.112587	0.0253432	0.0405714	0.0909837	0.147054	1.0651	1.10731
b1284	yciT	chr	-	1341620,	1342370,	-14.4054	-14.4525	-14.5001	-14.2838	-14.3816	-14.2749	-14.4388	-14.5135	-14.4452	-14.4477	-14.3322	-14.4628	0.0358124	0.0529212	0.026285	0.0418952	-0.115474	-0.130566	0.923079	0.913473
b2601	aroF	chr	-	2738101,	2739172,	-14.383	-14.377	-14.3338	-14.245	-14.1818	-14.0795	-14.5443	-14.3348	-14.4452	-14.3667	-14.1867	-14.4448	0.0447778	0.0632667	0.0263479	0.0419346	-0.180061	-0.258139	0.882666	0.836166
b2820	recB	chr	-	2950482,	2954025,	-14.6509	-14.9519	-14.913	-14.8787	-14.6338	-14.9863	-15.6507	-15.3071	-15.2463	-14.8194	-14.7609	-15.3944	0.969818	0.970384	0.0268522	0.0424288	-0.0584694	-0.633508	0.960282	0.644607
b3397	nudE	chr	-	3523610,	3524171,	-15.2575	-15.4	-15.139	-14.9163	-14.9099	-14.9332	-15.3229	-15.4214	-15.6325	-15.2673	-14.9155	-15.456	0.0434547	0.0617158	0.0269325	0.0424944	-0.351795	-0.540546	0.783608	0.687511
b0052	pdxA	chr	-	52426,	53416,	-14.9339	-14.9183	-14.9302	-14.507	-14.4729	-14.7084	-15.1993	-14.8615	-14.9598	-14.9276	-14.5171	-15.0077	0.0377808	0.05503	0.0270066	0.0425499	-0.410531	-0.490562	0.752346	0.711748
b3811	xerC	chr	+	3994309,	3995206,	-14.583	-14.8254	-14.6737	-14.5597	-14.6017	-14.4503	-14.688	-14.8716	-14.7671	-14.686	-14.5643	-14.7684	0.147657	0.175554	0.0279812	0.0437706	-0.121681	-0.204152	0.919116	0.868049
b3353	yheT	chr	+	3481223,	3482246,	-15.6644	-15.7284	-15.3714	-15.3805	-15.4657	-15.2639	-15.6655	-15.7925	-16.0239	-15.5939	-15.4055	-15.8224	0.176738	0.205009	0.0295143	0.0457765	-0.188398	-0.416951	0.87758	0.749006
b0464	acrR	chr	+	484984,	485632,	-15.9437	-15.8014	-15.5657	-15.4452	-15.3953	-15.179	-15.5649	-15.7176	-15.7988	-15.7798	-15.3771	-15.6897	0.0390505	0.0566343	0.0307371	0.0474043	-0.402697	-0.312555	0.756443	0.805215
b0862	artQ	chr	-	900756,	901473,	-14.9437	-14.9183	-15.0518	-14.4562	-14.4838	-14.8325	-15.243	-15.1387	-15.091	-14.9652	-14.521	-15.1567	0.0756289	0.0978884	0.0307116	0.0474043	-0.444198	-0.635767	0.734993	0.643598
b4019	metH	chr	+	4221850,	4225534,	-12.8953	-12.9128	-12.8939	-13.0607	-13.2087	-13.331	-12.8204	-12.9934	-12.7829	-12.9007	-13.1744	-12.8554	0.0610163	0.0820797	0.0316038	0.0486042	0.273726	0.319024	1.20893	1.24749
b3700	recF	chr	-	3878170,	3879244,	-15.4397	-15.4578	-15.3539	-15.4452	-15.2703	-15.2422	-16.0756	-16.8119	-16.2683	-15.4205	-15.322	-16.3312	0.263566	0.294194	0.0321025	0.0493019	-0.0984487	-1.0092	0.934037	0.496822
b1145	ymfK	chr	-	1201481,	1202156,	-14.6035	-14.8014	-14.7103	-14.7038	-14.7608	-14.5009	-14.9345	-15.0788	-14.942	-14.6975	-14.7004	-14.9783	0.637952	0.663397	0.0322129	0.049333	0.00288664	-0.277936	1.002	0.82477
b0639	nadD	chr	-	669153,	669795,	-15.3897	-15.4	-15.3252	-14.8861	-15.0872	-15.2422	-15.5789	-15.6119	-15.6325	-15.3743	-15.0378	-15.6075	0.0940286	0.116736	0.0325888	0.0497695	-0.33654	-0.569759	0.791938	0.673729
Below are not significant in either
b0898	ycaD	chr	+	945093,	946242,	-15.8242	-15.7811	-15.6274	-15.37	-15.0816	-15.5534	-15.806	-15.999	-15.9869	-15.7511	-15.2368	-15.9245	0.079627	0.102218	0.0329877	0.0503085	-0.514369	-0.687703	0.700099	0.620841
b0173	dxr	chr	+	193520,	194717,	-13.7279	-13.9709	-13.824	-13.4899	-13.5059	-13.6717	-13.8518	-13.8615	-13.8231	-13.8326	-13.5239	-13.8443	0.0374533	0.054806	0.0337827	0.0512356	-0.308747	-0.320455	0.807343	0.800817
b2936	yggG	chr	+	3079934,	3080693,	-13.6834	-13.5708	-13.5792	-13.5959	-13.6297	-13.7009	-13.5649	-13.4899	-13.4801	-13.6151	-13.6286	-13.5121	0.550429	0.575663	0.0342108	0.0517415	0.013513	0.116481	1.00941	1.08409
b2511	der	chr	-	2633905,	2635378,	-11.5153	-11.565	-11.5094	-11.3812	-11.3752	-11.4945	-11.5868	-11.5629	-11.6147	-11.5299	-11.3943	-11.5895	0.0830978	0.106175	0.0344582	0.0519005	-0.135561	-0.195188	0.910316	0.873459
b2606	rplS	chr	-	2742204,	2742552,	-7.6999	-7.66776	-7.68135	-7.68812	-7.63522	-7.65297	-7.7326	-7.73969	-7.73923	-7.68383	-7.65534	-7.73705	0.266499	0.296863	0.0347321	0.0521697	-0.0284983	-0.0817125	0.98044	0.944935
b2032	wbbK	chr	-	2101414,	2102533,	-12.1883	-12.2602	-12.2278	-12.1443	-12.0934	-11.5821	-12.8645	-12.6949	-12.7789	-12.2232	-12.0209	-12.7824	0.251773	0.282779	0.0351999	0.0527276	-0.202336	-0.761579	0.869142	0.58985
b2947	gshB	chr	+	3089899,	3090850,	-12.0553	-12.0475	-12.0899	-12.0305	-11.9899	-11.8695	-12.1233	-12.198	-12.1783	-12.0625	-11.9846	-12.1645	0.164991	0.192812	0.0353289	0.0527765	-0.0778597	-0.17987	0.947462	0.882783
b2379	yfdZ	chr	-	2495078,	2496317,	-14.2094	-14.1263	-14.1415	-14.2165	-14.1152	-14.2315	-13.9616	-14.0788	-14.0475	-14.1618	-14.1653	-14.0259	0.55898	0.584049	0.0352875	0.0527765	0.00350817	0.139421	1.00243	1.10146
b1806	yeaY	chr	-	1887974,	1888556,	-14.2697	-14.2696	-14.3452	-14.4899	-14.4948	-14.7384	-14.2654	-14.151	-14.3134	-14.2909	-14.5268	-14.2472	0.0656017	0.0867559	0.0356048	0.0530438	0.235895	0.279628	1.17764	1.21388
b3702	dnaA	chr	-	3880348,	3881752,	-12.8898	-12.9	-12.8473	-12.6206	-12.6833	-12.9203	-13.1413	-13.2043	-13.1953	-12.8808	-12.6944	-13.1788	0.26874	0.298751	0.0355975	0.0530438	-0.186487	-0.484466	0.878743	0.714761
b2910	zapA	chr	+	3053633,	3053963,	-14.6244	-14.4605	-14.5358	-14.5959	-14.5665	-14.3658	-14.8645	-14.8315	-14.8813	-14.5429	-14.5444	-14.8606	0.741907	0.76209	0.0357542	0.0531941	0.00156971	-0.316176	1.00109	0.803196
b1570	dicA	chr	+	1645957,	1646365,	-15.5452	-15.6651	-15.7214	-15.4233	-15.6917	-15.3775	-15.7576	-15.9339	-16.1009	-15.6336	-15.5484	-15.9245	0.277366	0.306993	0.0359173	0.0533643	-0.0852609	-0.376089	0.942614	0.770524
b4328	iadA	chr	-	4556376,	4557549,	-13.1467	-13.0028	-13.0959	-13.1454	-13.2593	-13.3541	-13.0127	-12.9499	-13.0523	-13.083	-13.2336	-13.0077	0.0883983	0.111516	0.0361804	0.0536096	0.150583	0.225921	1.11002	1.16952
b1033	ghrA	chr	+	1097108,	1098047,	-12.4831	-12.4835	-12.5179	-12.4369	-12.5059	-12.3168	-12.6917	-12.6704	-12.6254	-12.4931	-12.4533	-12.6616	0.306433	0.336891	0.0363129	0.0536608	-0.0398533	-0.208299	0.972754	0.865557
b3826	yigL	chr	+	4008222,	4009023,	-13.4759	-13.4918	-13.3832	-13.3519	-13.4353	-13.4318	-13.5375	-13.5456	-13.5325	-13.4539	-13.4064	-13.5381	0.371478	0.401548	0.0376953	0.0554908	-0.0475067	-0.131694	0.967607	0.912759
b0870	ltaE	chr	-	907515,	908517,	-13.2372	-13.2509	-13.2505	-13.2094	-13.3135	-13.2859	-13.0414	-13.1417	-12.9442	-13.2455	-13.2739	-13.0343	0.53125	0.557202	0.0377034	0.0554908	0.0283116	0.239606	1.01982	1.18067
b3150	yraP	chr	+	3294430,	3295006,	-13.2362	-13.0874	-13.1795	-13.1978	-13.2087	-13.3835	-12.9846	-12.9852	-13.0499	-13.1691	-13.2296	-13.0077	0.273171	0.30337	0.0383919	0.0563527	0.060528	0.221955	1.04285	1.16631
b1343	dbpA	chr	+	1407534,	1408908,	-15.4213	-15.4052	-15.395	-14.7851	-14.8288	-15.179	-15.4199	-15.5456	-15.4705	-15.4084	-14.8605	-15.4741	0.0616814	0.0826697	0.0391674	0.0569631	-0.547913	-0.613651	0.684009	0.653541
b1036	ycdZ	chr	+	1099518,	1100010,	-14.4867	-14.4	-14.398	-14.2118	-14.2392	-14.3775	-14.7262	-14.6904	-14.4452	-14.4318	-14.2496	-14.61	0.0775483	0.0999005	0.0390993	0.0569631	-0.182271	-0.360461	0.881315	0.778915
b1706	ydiU	chr	-	1787831,	1789268,	-14.5881	-14.7316	-14.6773	-14.4673	-14.4693	-14.4628	-14.9708	-14.6994	-14.8644	-14.6601	-14.4677	-14.8488	0.0411641	0.0589983	0.0408028	0.0590993	-0.1924	-0.381084	0.875149	0.767861
b2619	yfjG	chr	-	2752309,	2752786,	-13.3295	-13.2567	-13.2943	-13.0671	-13.1466	-13.2749	-13.3706	-13.4515	-13.405	-13.2949	-13.1375	-13.4063	0.153244	0.180821	0.0414758	0.0598366	-0.157338	-0.268776	0.896678	0.830023
b3237	argR	chr	+	3382724,	3383195,	-13.3522	-13.3186	-13.2573	-13.2235	-13.1744	-13.2584	-13.5307	-13.7176	-13.4421	-13.3133	-13.2029	-13.55	0.0715292	0.0935776	0.0417722	0.0601849	-0.110396	-0.3471	0.926333	0.786163
b1381	ydbH	chr	+	1441074,	1443714,	-14.8733	-14.9786	-14.9696	-14.955	-14.9197	-14.7537	-15.5239	-15.1758	-15.2032	-14.9351	-14.9053	-15.2986	0.427651	0.45775	0.0422661	0.0606571	-0.0297477	-0.39332	0.979592	0.761376
b4395	ytjC	chr	+	4631819,	4632467,	-13.6152	-13.7479	-13.645	-13.6777	-13.6791	-14.0045	-13.2237	-13.392	-13.5061	-13.6668	-13.7225	-13.3688	0.396797	0.425557	0.0424561	0.0608501	0.0557499	0.353689	1.0394	1.27782
b3559	glyS	chr	-	3720350,	3722420,	-9.4982	-9.5105	-9.48854	-9.50649	-9.548	-9.59232	-9.43072	-9.43426	-9.437	-9.4995	-9.54043	-9.43399	0.17567	0.203985	0.0428025	0.0611863	0.0409336	0.106437	1.02878	1.07657
b2381	ypdB	chr	+	2498404,	2499139,	-15.3986	-15.4904	-15.4684	-15.4899	-15.3022	-15.2639	-15.5375	-15.8716	-15.8313	-15.4486	-15.3562	-15.7326	0.285459	0.315098	0.0428627	0.0611893	-0.0923426	-0.376372	0.937998	0.770372
b2330	prmB	chr	-	2445529,	2446462,	-11.63	-11.5747	-11.6074	-11.586	-11.6242	-11.5139	-11.7282	-11.7028	-11.6568	-11.605	-11.5946	-11.695	0.477206	0.50732	0.0429163	0.0611893	-0.0103968	-0.100421	0.992819	0.932761
b2523	pepB	chr	-	2653096,	2654380,	-10.6722	-10.6875	-10.6452	-10.5541	-10.601	-10.6762	-10.7531	-10.7348	-10.778	-10.6695	-10.596	-10.7564	0.240132	0.271076	0.0429843	0.0612066	-0.0734996	-0.160475	0.95033	0.89473
b3359	argD	chr	-	3486981,	3488202,	-14.7307	-14.7946	-14.7517	-14.4562	-14.6257	-14.7084	-14.7655	-15.0555	-15.0239	-14.7577	-14.5783	-14.937	0.153627	0.180883	0.0431394	0.0613475	-0.179374	-0.358627	0.883086	0.779907
b0183	rnhB	chr	+	204492,	205089,	-14.6999	-14.7123	-14.7402	-14.7104	-14.5096	-14.6501	-14.7978	-15.0788	-15.1108	-14.7155	-14.5946	-14.9848	0.251789	0.282779	0.0432456	0.0614188	-0.120944	-0.390222	0.919586	0.763012
b2988	gsp	chr	-	3134684,	3136544,	-13.5071	-13.5868	-13.5741	-13.3545	-13.3413	-13.6009	-13.9525	-13.6247	-13.8436	-13.5523	-13.3815	-13.8109	0.277556	0.306993	0.0439647	0.0623593	-0.170822	-0.429374	0.888336	0.742584
b4493	gapC	chr	-	1487736,	1488737,	-13.9785	-13.9921	-13.9563	-13.7507	-13.9649	-13.7233	-14.1361	-14.1758	-14.146	-13.9766	-13.8531	-14.1513	0.164611	0.192574	0.0440582	0.0624111	-0.123509	-0.298154	0.917953	0.813292
b2124	yehS	chr	-	2209747,	2210218,	-14.711	-14.7028	-14.8834	-14.4287	-14.5171	-14.1086	-14.9345	-14.7925	-14.7438	-14.7555	-14.4199	-14.8224	0.0605776	0.0815898	0.0450107	0.0636779	-0.335625	-0.40256	0.792441	0.756515
b1143	ymfI	chr	+	1200719,	1201061,	-15.1476	-15.2861	-15.2054	-15.0191	-15.2026	-15.0229	-15.2654	-15.5619	-15.3718	-15.2091	-15.1118	-15.3858	0.155357	0.182723	0.0457666	0.0646638	-0.0972986	-0.27408	0.934782	0.826978
b3064	ygjD	chr	-	3207551,	3208565,	-12.8212	-12.7963	-12.7374	-12.5317	-12.5743	-12.7384	-12.9233	-12.7997	-12.8089	-12.7885	-12.5829	-12.8451	0.0994897	0.122131	0.0465049	0.0654535	-0.205621	-0.262196	0.867165	0.833818
b2313	cvpA	chr	-	2428296,	2428785,	-14.8733	-14.7187	-14.8463	-14.6206	-14.6749	-14.8164	-15.3706	-14.9445	-15.1718	-14.8125	-14.6764	-15.1641	0.224999	0.254519	0.0468892	0.0658252	-0.136107	-0.487636	0.909972	0.713193
b2618	yfjF	chr	-	2752029,	2752320,	-15.3763	-15.1718	-15.4191	-15.0949	-14.9958	-15.2422	-15.3112	-15.6815	-15.4963	-15.3166	-15.0629	-15.4787	0.113694	0.138327	0.0476799	0.0666991	-0.253604	-0.415716	0.838799	0.749647
b3956	ppc	chr	-	4148469,	4151121,	-11.8859	-11.8742	-11.8689	-11.8456	-11.8664	-11.8488	-11.9278	-12.027	-12.031	-11.8771	-11.8568	-11.9929	0.05313	0.073179	0.047946	0.0668347	-0.0203278	-0.136132	0.986009	0.909956
b1794	yeaP	chr	+	1875738,	1876764,	-14.8827	-14.9406	-14.7402	-14.6021	-14.5665	-14.7847	-14.7897	-15.0326	-14.9778	-14.8589	-14.6089	-14.9245	0.0878921	0.111134	0.0479745	0.0668347	-0.249969	-0.315547	0.840914	0.803546
b4389	radA	chr	+	4623934,	4625317,	-14.28	-14.3077	-13.9942	-14.2789	-14.2087	-14.4881	-14.0127	-13.9499	-13.9733	-14.2008	-14.2706	-13.9799	0.373833	0.403696	0.0482552	0.0671101	0.0697683	0.290666	1.04955	1.2232
b3822	recQ	chr	+	4003886,	4005716,	-15.1104	-15.0822	-14.8382	-14.8712	-14.7476	-15.1384	-15.2767	-15.5951	-15.2354	-15.0181	-14.841	-15.3478	0.563784	0.588507	0.0498465	0.0690037	-0.177145	-0.506857	0.884452	0.703754
b0033	carB	chr	+	30816,	34038,	-12.6336	-12.5817	-12.6397	-12.3609	-12.283	-12.5074	-12.6729	-12.6594	-12.5176	-12.6179	-12.3403	-12.6119	0.061207	0.0822351	0.0517312	0.0713422	-0.277544	-0.271583	0.824994	0.82841
b3098	yqjD	chr	+	3247396,	3247702,	-12.755	-12.8437	-12.7699	-12.9847	-13.0287	-13.3716	-12.6711	-12.5909	-12.6834	-12.7882	-13.0594	-12.6512	0.102889	0.126162	0.0525084	0.0723228	0.271207	0.408192	1.20682	1.32702
b3348	slyX	chr	+	3475661,	3475880,	-15.1104	-15.0905	-14.9696	-14.8204	-15.0115	-14.6644	-15.2542	-15.1025	-15.2139	-15.0622	-14.8902	-15.1937	0.141224	0.168821	0.0527372	0.0725468	-0.171967	-0.303528	0.887632	0.810269
b2346	vacJ	chr	-	2462273,	2463029,	-11.9029	-11.9666	-11.8699	-11.8824	-11.7814	-11.8674	-11.9974	-11.9167	-11.9464	-11.9141	-11.8271	-11.9551	0.177499	0.205621	0.0535896	0.0731678	-0.0869964	-0.127995	0.941481	0.915102
b1210	hemA	chr	+	1262936,	1264193,	-14.4076	-14.5986	-14.5227	-14.5717	-14.4657	-14.2208	-14.9078	-14.8716	-14.6112	-14.5018	-14.4602	-14.7853	0.498363	0.526237	0.0546428	0.0743278	-0.0416072	-0.325051	0.971572	0.79827
b3042	yqiC	chr	+	3182861,	3183152,	-13.5971	-13.5708	-13.6557	-13.599	-13.5078	-13.1384	-13.8183	-13.8514	-14.0286	-13.6047	-13.4752	-13.8998	0.3033	0.333783	0.0569315	0.0768681	-0.129546	-0.424637	0.914119	0.745026
b3019	parC	chr	-	3161736,	3163995,	-12.4408	-12.4733	-12.4145	-12.3714	-12.3791	-12.4597	-12.4873	-12.4899	-12.592	-12.4439	-12.3881	-12.5245	0.309654	0.340092	0.0570691	0.0769589	-0.0557773	-0.136323	0.962076	0.909835
b1439	ydcR	chr	+	1508026,	1509433,	-15.5551	-15.4849	-15.6628	-15.4452	-15.348	-15.1384	-15.6072	-15.6638	-15.676	-15.5609	-15.3459	-15.648	0.0855521	0.108551	0.0579399	0.0778456	-0.215063	-0.302136	0.861508	0.81105
b2679	proX	chr	+	2805153,	2806146,	-10.8985	-10.9331	-10.9011	-10.8379	-10.8846	-10.8154	-10.9205	-10.9299	-10.9124	-10.9107	-10.8585	-10.9204	0.0657014	0.0867829	0.0591527	0.0791837	-0.052203	-0.0619256	0.964462	0.957985
b1177	ycgJ	chr	+	1225822,	1226191,	-15.004	-14.7091	-14.7517	-14.8936	-14.7129	-14.7384	-14.8817	-15.1025	-15.0619	-14.8274	-14.7747	-15.0077	0.733839	0.755219	0.0590844	0.0791837	-0.0527074	-0.232932	0.964125	0.850904
b4172	hfq	chr	+	4398310,	4398619,	-10.5396	-10.457	-10.4907	-10.5328	-10.6069	-10.3153	-10.7296	-10.8514	-10.7696	-10.4977	-10.5353	-10.7789	0.915231	0.919066	0.0602506	0.0805549	0.0376509	-0.243586	1.02644	0.844643
b1267	yciO	chr	+	1322121,	1322742,	-12.864	-12.9045	-12.7507	-12.7354	-12.7932	-12.8084	-12.8709	-12.8464	-12.854	-12.8437	-12.7759	-12.8576	0.323583	0.353372	0.0607505	0.0811242	-0.0677741	-0.0817504	0.954109	0.94491
b2502	ppx	chr	+	2623136,	2624678,	-14.0794	-14.0315	-13.9024	-13.9988	-13.9421	-13.7926	-14.2155	-14.1144	-14.0333	-14.0109	-13.9373	-14.1189	0.315617	0.346293	0.061987	0.082574	-0.073589	-0.181587	0.950271	0.881732
b2328	mepA	chr	-	2443581,	2444406,	-14.7449	-14.8014	-14.7517	-14.5361	-14.6542	-14.7084	-14.98	-15.1265	-14.775	-14.7654	-14.6213	-14.9432	0.107751	0.131536	0.0653619	0.0867531	-0.144072	-0.321905	0.904961	0.800013
b3839	tatC	chr	+	4020758,	4021535,	-14.004	-14.0495	-14.0193	-13.3596	-13.3816	-13.7384	-13.7897	-13.9715	-13.9027	-14.0234	-13.4217	-13.8816	0.048001	0.0666421	0.06764	0.0894515	-0.601682	-0.459886	0.658985	0.727044
b0969	yccK	chr	-	1029561,	1029891,	-14.2392	-14.3199	-14.264	-14.245	-14.1237	-14.0229	-14.4906	-14.2334	-14.4203	-14.2727	-14.1472	-14.3858	0.142668	0.170176	0.0681237	0.0897826	-0.125508	-0.238602	0.916681	0.847566
b3056	cca	chr	+	3199912,	3201151,	-14.9372	-14.9786	-14.913	-14.6021	-14.7345	-14.3425	-14.98	-14.966	-14.8231	-14.9438	-14.6255	-14.9183	0.0758542	0.0980642	0.0702974	0.0924078	-0.318275	-0.292759	0.802028	0.816339
b1768	pncA	chr	+	1849910,	1850552,	-13.9552	-13.8185	-13.8483	-13.6144	-13.5302	-13.7847	-13.7735	-13.892	-14.0146	-13.8779	-13.5935	-13.8907	0.0707651	0.0929111	0.0708748	0.0929305	-0.284312	-0.29712	0.821133	0.813876
b2473	ypfH	chr	-	2591093,	2591792,	-14.583	-14.5635	-14.5657	-14.5478	-14.8012	-14.7233	-14.5172	-14.0906	-14.3249	-14.5715	-14.7004	-14.3128	0.249732	0.281045	0.0708103	0.0929305	0.128856	0.387575	1.09343	1.30819
b3105	yhaJ	chr	-	3251339,	3252236,	-15.0491	-15.0989	-15.0899	-15.0949	-14.9197	-15.2859	-14.734	-14.7084	-14.8069	-15.0772	-15.0267	-14.7518	0.862498	0.878544	0.0709497	0.0929305	-0.0504573	0.274927	0.96563	1.20993
b4004	zraR	chr	+	4201342,	4202668,	-15.3986	-15.3395	-15.395	-15.8639	-16.0434	-16.3541	-15.7897	-15.6815	-15.3134	-15.3777	-16.0212	-15.573	0.0363829	0.053478	0.0725336	0.0948917	0.643538	0.448217	1.56216	1.36435
b0414	ribD	chr	+	432678,	433782,	-12.8788	-12.899	-12.8311	-12.888	-12.8819	-12.8285	-13.0342	-13.2765	-13.4111	-12.8716	-12.8759	-13.2307	0.905132	0.910859	0.0729132	0.0950475	0.0042703	-0.354864	1.00296	0.781943
b4226	ppa	chr	-	4447144,	4447675,	-8.45729	-8.48444	-8.49118	-8.4266	-8.42648	-8.3203	-8.47891	-8.48885	-8.53102	-8.47595	-8.41025	-8.50019	0.125231	0.150682	0.0744584	0.0963735	-0.0656962	-0.0899349	0.955484	0.939565
b0179	lpxD	chr	+	200970,	201996,	-11.9101	-11.9863	-11.8918	-11.5538	-11.5283	-11.7965	-11.8741	-11.8805	-11.9464	-11.9296	-11.5738	-11.9013	0.0587777	0.0796554	0.0761039	0.0980763	-0.35584	-0.327535	0.781414	0.796897
b2158	yeiH	chr	+	2247738,	2248788,	-15.0281	-15.0255	-14.9003	-14.955	-14.9148	-15.0045	-15.0366	-15.2531	-15.2463	-14.9895	-14.9412	-15.1714	0.626058	0.651648	0.0761323	0.0980763	-0.0482707	-0.230233	0.967095	0.852497
b0087	mraY	chr	+	96001,	97084,	-13.0412	-13.0833	-13.0401	-12.9414	-12.8628	-13.0462	-13.0731	-13.07	-13.2059	-13.0547	-12.9148	-13.118	0.181016	0.209281	0.0768011	0.0986711	-0.139899	-0.203165	0.907583	0.868643
b2821	ptrA	chr	-	2954017,	2956906,	-13.7752	-13.7562	-13.7308	-13.7643	-13.7498	-13.4817	-13.8688	-14.0441	-13.9027	-13.7561	-13.7114	-13.9307	0.436212	0.466002	0.0769214	0.0986711	-0.0446566	-0.219296	0.969521	0.858984
b3601	mtlR	chr	+	3773594,	3774182,	-15.8547	-16.137	-15.9389	-15.4899	-15.6833	-15.7537	-15.9986	-15.8716	-16.36	-15.9677	-15.6255	-16.0751	0.0438753	0.0622324	0.0774956	0.0992488	-0.342205	-0.449586	0.788835	0.732253
b0738	tolR	chr	+	775071,	775500,	-14.7738	-14.9901	-14.8301	-14.5186	-14.7564	-14.4754	-14.8142	-15.0213	-14.7515	-14.8589	-14.6297	-14.8488	0.0660826	0.0871812	0.0802043	0.102359	-0.22921	-0.219079	0.853102	0.859114
b2326	yfcM	chr	-	2442224,	2442773,	-15.7138	-15.6045	-15.7982	-15.7104	-15.6097	-15.6644	-15.7897	-15.9128	-15.7361	-15.6996	-15.6507	-15.8052	0.536083	0.561732	0.0820644	0.104368	-0.0488624	-0.154428	0.966698	0.898488
b0962	helD	chr	+	1023693,	1025748,	-14.0298	-14.0864	-14.0239	-14.4179	-14.2766	-14.5668	-14.1258	-14.24	-14.1614	-14.0467	-14.3632	-14.1714	0.0404864	0.0582558	0.0844314	0.107129	0.3165	0.19174	1.24531	1.14214
b0859	rumB	chr	+	897740,	898868,	-15.2412	-15.2485	-15.3366	-15.121	-15.1729	-15.2422	-15.593	-15.4066	-15.2907	-15.2704	-15.1653	-15.4249	0.10768	0.131536	0.0886452	0.111828	-0.105084	-0.259583	0.929751	0.835329
b4558	yifL	chr	+	3992544,	3992748,	-13.6958	-13.7139	-13.7555	-14.2643	-14.138	-13.9774	-13.806	-13.9445	-13.9376	-13.7187	-14.1532	-13.8922	0.0347388	0.0516834	0.090119	0.113426	0.434529	0.261056	1.35147	1.19836
b1564	relB	chr	-	1643656,	1643896,	-14.1514	-14.0156	-14.1976	-13.4646	-13.5569	-13.882	-13.9078	-13.8972	-14.1563	-14.1175	-13.5683	-13.988	0.045039	0.0635538	0.0911689	0.114615	-0.549177	-0.419754	0.68341	0.747552
b2418	pdxK	chr	-	2534407,	2535259,	-13.0633	-13.0465	-12.9763	-13.2522	-13.1877	-13.0462	-12.9616	-12.9769	-13.0146	-13.0323	-13.1867	-12.9848	0.146928	0.174876	0.0917172	0.11488	0.154372	0.2019	1.11294	1.15021
b3433	asd	chr	-	3571797,	3572901,	-12.1481	-12.0921	-12.1057	-12.1265	-12.1781	-12.0651	-12.0198	-12.0199	-12.0369	-12.1171	-12.1435	-12.0259	0.842657	0.860736	0.0917836	0.11488	0.0264023	0.117613	1.01847	1.08494
b1591	dmsD	chr	+	1662529,	1663144,	-15.1439	-15.3745	-15.195	-14.8132	-14.7876	-15.1384	-15.2881	-15.24	-15.1208	-15.2318	-14.8434	-15.2126	0.0834331	0.106434	0.0988233	0.122561	-0.388373	-0.369207	0.76399	0.774208
b2709	norR	chr	-	2828796,	2830311,	-15.6429	-15.5693	-15.513	-15.6712	-15.7432	-15.7233	-15.593	-15.5135	-15.302	-15.5802	-15.7158	-15.4605	0.0464392	0.0651935	0.0998058	0.123489	0.135599	0.255315	1.09855	1.1936
b0239	frsA	chr	+	256526,	257771,	-12.8874	-12.8622	-12.8586	-12.9144	-13.034	-13.0322	-12.8101	-12.9024	-12.931	-12.8707	-12.9927	-12.8793	0.0815436	0.104433	0.10543	0.129861	0.121982	0.113377	1.08823	1.08176
b1840	yebZ	chr	-	1921742,	1922615,	-15.0668	-15.1762	-15.1846	-14.8861	-15.0434	-14.3196	-15.4199	-15.3348	-15.2573	-15.1359	-14.8605	-15.3354	0.213179	0.242652	0.110206	0.135135	-0.275429	-0.474906	0.826205	0.719514
b3005	exbD	chr	-	3148839,	3149265,	-15.9702	-15.864	-15.974	-15.7371	-15.9197	-15.6644	-15.8731	-15.9769	-16.1614	-15.9351	-15.817	-16.0011	0.15357	0.180883	0.113296	0.138614	-0.118104	-0.184131	0.921398	0.880179
b4595	yciY	chr	+	1306811,	1306985,	-15.9503	-15.8569	-15.7517	-15.3911	-15.2894	-15.6936	-15.636	-15.892	-15.7515	-15.8601	-15.3771	-15.749	0.0643555	0.085521	0.115389	0.140702	-0.482931	-0.371889	0.715523	0.77277
b3148	yraN	chr	+	3293415,	3293811,	-15.2988	-15.6713	-15.4497	-15.9867	-15.7786	-16.2208	-15.7576	-15.3775	-15.7671	-15.4575	-15.9053	-15.6378	0.0368705	0.0541196	0.116705	0.141991	0.447854	0.267523	1.36401	1.20374
b2509	xseA	chr	+	2632253,	2633624,	-14.8827	-14.7811	-14.8061	-14.2887	-14.2894	-14.594	-14.7897	-14.4667	-14.8231	-14.8263	-14.3305	-14.6976	0.0415406	0.0594601	0.119154	0.14449	-0.495774	-0.36713	0.709181	0.775324
b4260	pepA	chr	-	4482462,	4483974,	-11.8667	-11.9022	-11.8678	-11.8964	-11.9751	-11.9662	-11.9233	-11.8577	-11.8623	-11.8787	-11.947	-11.882	0.0974822	0.120206	0.119947	0.14529	0.0682883	0.0650813	1.04847	1.04614
b3844	fre	chr	+	4024549,	4025251,	-12.4677	-12.4897	-12.5284	-12.4274	-12.3979	-12.5401	-12.5189	-12.6312	-12.5425	-12.4922	-12.428	-12.5596	0.461571	0.491176	0.123158	0.14885	-0.0641582	-0.131609	0.956503	0.912813
b1585	ynfC	chr	-	1654770,	1655481,	-15.9113	-15.9671	-15.983	-15.924	-15.8904	-15.7847	-16.2654	-16.0671	-15.9331	-15.95	-15.8852	-16.082	0.161374	0.189192	0.134089	0.161526	-0.0648315	-0.196803	0.956057	0.872482
b0780	ybhK	chr	-	814961,	815870,	-15.2332	-15.2814	-15.129	-15.0692	-14.9446	-15.179	-15.2654	-15.2531	-15.141	-15.2181	-15.0185	-15.2164	0.148837	0.176573	0.135166	0.162644	-0.199626	-0.197922	0.870776	0.871805
b2125	yehT	chr	-	2210264,	2210984,	-14.3263	-14.3053	-14.4497	-14.9472	-15.2703	-14.7847	-14.5105	-14.7639	-14.7515	-14.3534	-15.0771	-14.6661	0.0363846	0.053478	0.137063	0.164746	0.723725	0.411033	1.65144	1.32964
b3347	fkpA	chr	-	3474628,	3475441,	-10.7596	-10.787	-10.8251	-10.7204	-10.7811	-10.6122	-10.7695	-10.8396	-10.8405	-10.7872	-10.7345	-10.815	0.217214	0.246111	0.137606	0.165217	-0.0526939	-0.0804973	0.964134	0.945732
b1531	marA	chr	+	1617597,	1617981,	-13.6972	-13.6045	-13.7517	-13.7678	-13.5978	-13.4318	-13.9034	-13.7221	-13.8313	-13.6807	-13.6255	-13.8224	0.484738	0.514829	0.137921	0.165414	-0.0552407	-0.196943	0.962434	0.872397
b1905	ftnA	chr	+	1986739,	1987237,	-10.2943	-10.2341	-10.2492	-10.0439	-10.0737	-9.77543	-10.1316	-10.1802	-10.227	-10.2611	-10.0156	-10.1793	0.0848864	0.107831	0.142691	0.170853	-0.245475	-0.163634	0.843538	0.892773
b2075	mdtB	chr	+	2153286,	2156409,	-15.7767	-15.6651	-15.7982	-15.4673	-15.5022	-15.6936	-16.1779	-15.6638	-15.8313	-15.7446	-15.5171	-15.8876	0.0933016	0.116097	0.142767	0.170853	-0.227491	-0.370531	0.854119	0.773498
b0398	sbcD	chr	-	414973,	416176,	-14.4986	-14.4313	-14.67	-14.339	-14.4513	-14.6501	-14.5443	-14.8514	-14.7285	-14.5222	-14.4399	-14.695	0.670191	0.693628	0.148188	0.176953	-0.0822863	-0.255074	0.94456	0.837944
b2007	yeeX	chr	-	2077055,	2077385,	-11.5053	-11.517	-11.5199	-11.3225	-11.2751	-11.1522	-11.3766	-11.3694	-11.3416	-11.5134	-11.2716	-11.362	0.0341089	0.0510235	0.151565	0.180592	-0.241749	-0.090345	0.84572	0.939298
b3282	rimN	chr	-	3428864,	3429437,	-14.1571	-14.2051	-14.1743	-13.7104	-13.7586	-14.0322	-14.0175	-14.0555	-14.091	-14.1779	-13.7794	-14.0545	0.0722101	0.0942149	0.153096	0.182218	-0.398516	-0.275168	0.758638	0.826354
b3998	nfi	chr	+	4196812,	4197484,	-15.4213	-15.4525	-15.4873	-15.5478	-15.5626	-14.9684	-15.6215	-15.6638	-16.1208	-15.4503	-15.4528	-15.7938	0.678685	0.701094	0.157665	0.187248	0.00245725	-0.340963	1.0017	0.789514
b4162	orn	chr	+	4389626,	4390172,	-12.6684	-12.7728	-12.7526	-12.7541	-12.8311	-12.7384	-12.6036	-12.6972	-12.7496	-12.7265	-12.791	-12.6818	0.371027	0.401457	0.161453	0.19154	0.0645243	0.109218	1.04574	1.07864
b0810	glnP	chr	-	845682,	846342,	-14.2904	-14.2957	-14.3597	-14.4125	-14.4585	-14.7537	-14.3465	-14.2799	-14.3134	-14.3117	-14.4827	-14.3148	0.163758	0.19178	0.162535	0.192614	0.170991	0.16786	1.12583	1.12339
b2701	mltB	chr	-	2822512,	2823598,	-13.8167	-13.8254	-13.6955	-13.6616	-13.6501	-13.6717	-13.7418	-14.0906	-13.819	-13.7837	-13.6571	-13.8651	0.103243	0.126455	0.169428	0.200134	-0.126622	-0.207957	0.915974	0.865762
b1871	cmoB	chr	+	1951465,	1952437,	-13.8348	-13.8446	-13.8606	-13.6972	-13.5473	-13.8989	-13.9846	-13.9024	-13.8813	-13.8454	-13.6444	-13.9229	0.323682	0.353372	0.169255	0.200134	-0.201019	-0.278524	0.869936	0.824434
b3002	yqhA	chr	-	3146998,	3147493,	-13.2005	-13.1762	-13.168	-12.9747	-13.0802	-13.205	-13.232	-13.2237	-13.2139	-13.183	-13.0615	-13.2231	0.288931	0.31829	0.175933	0.207593	-0.121486	-0.161531	0.91924	0.894076
b2908	pepP	chr	-	3051536,	3052862,	-11.5785	-11.5435	-11.5436	-11.5287	-11.4999	-11.4706	-11.5332	-11.5125	-11.5705	-11.5568	-11.5051	-11.5402	0.0603299	0.0813562	0.177409	0.209109	-0.0517013	-0.0351046	0.964798	0.975961
b3744	asnA	chr	+	3925177,	3926170,	-15.3242	-15.4632	-15.4252	-15.4673	-15.3613	-15.5804	-15.4325	-15.1025	-14.8069	-15.3981	-15.4271	-15.089	0.442496	0.471795	0.178963	0.210715	0.0290696	0.338175	1.02035	1.26416
b3091	uxaA	chr	-	3239848,	3241336,	-15.8002	-15.9443	-15.822	-16.5013	-16.0872	-15.9507	-15.7262	-15.999	-15.8644	-15.853	-16.1898	-15.8517	0.182854	0.210763	0.187107	0.219596	0.336754	0.338055	1.26291	1.26405
b4180	rlmB	chr	+	4407297,	4408029,	-13.6807	-13.63	-13.6362	-13.4871	-13.5227	-13.5872	-13.5206	-13.7782	-13.8109	-13.6509	-13.52	-13.6937	0.0377923	0.05503	0.196609	0.229272	-0.130866	-0.173657	0.913283	0.886592
b2901	bglA	chr	+	3041683,	3043123,	-11.3181	-11.2861	-11.3273	-11.4583	-11.4095	-11.5634	-11.3495	-11.4658	-11.3321	-11.31	-11.4477	-11.3765	0.0580985	0.0788326	0.201159	0.233583	0.137724	0.0712142	1.10017	1.0506
b4377	yjjU	chr	+	4610433,	4611507,	-15.4397	-15.535	-15.4559	-15.4452	-15.5626	-15.6936	-15.2767	-15.4364	-15.5225	-15.4754	-15.5405	-15.4074	0.338272	0.367833	0.201397	0.233612	0.0650915	0.133086	1.04615	1.09664
b0212	gloB	chr	-	234026,	234782,	-14.4304	-14.413	-14.3395	-14.5013	-14.4265	-14.4628	-14.3406	-14.3071	-14.4705	-14.3981	-14.4565	-14.3752	0.125362	0.150682	0.20225	0.234106	0.0584385	0.0813242	1.04134	1.05799
b3103	yhaH	chr	+	3250325,	3250691,	-14.4795	-14.5153	-14.5624	-14.7921	-14.7215	-14.5401	-14.5859	-14.5135	-14.5628	-14.5148	-14.7158	-14.556	0.148639	0.176529	0.218927	0.251812	0.201079	0.159799	1.14956	1.11713
b1538	dcp	chr	-	1623358,	1625404,	-11.6379	-11.7008	-11.6809	-11.6817	-11.7597	-11.8325	-11.7003	-11.6226	-11.7171	-11.6709	-11.7436	-11.6828	0.181186	0.209281	0.220623	0.253231	0.072678	0.060795	1.05167	1.04304
b2833	ygdR	chr	+	2969292,	2969511,	-15.0421	-14.9901	-15.195	-15.955	-15.8149	-15.4256	-15.458	-15.4667	-15.4705	-15.0662	-15.7933	-15.465	0.039712	0.0573676	0.23408	0.267555	0.727098	0.328309	1.65531	1.25554
b0571	cusR	chr	-	593982,	594666,	-15.8922	-16.1284	-15.8463	-15.6972	-15.7086	-15.8164	-16.3585	-15.9128	-15.7988	-15.9525	-15.7203	-16.0077	0.118249	0.14355	0.236392	0.269915	-0.232267	-0.28738	0.851296	0.819389
b3868	glnG	chr	-	4051891,	4053301,	-14.6349	-14.6467	-14.5195	-14.8861	-14.7129	-14.7537	-14.3406	-14.7545	-14.6468	-14.6047	-14.7747	-14.5609	0.0533641	0.0734092	0.237609	0.271023	0.170014	0.213868	1.12507	1.15979
b2836	aas	chr	-	2971876,	2974036,	-15.0491	-14.8891	-14.9216	-14.652	-14.9446	-14.8989	-14.98	-14.9552	-15.0053	-14.9576	-14.8337	-14.9815	0.322495	0.352779	0.242351	0.276144	-0.123865	-0.147829	0.917726	0.902607
b2896	ygfX	chr	-	3038437,	3038845,	-15.9372	-15.8428	-15.7214	-15.8936	-15.9099	-15.6359	-15.7735	-16.1634	-16.141	-15.8413	-15.8605	-16.0077	0.85904	0.875836	0.24783	0.282093	0.0191281	-0.147202	1.01335	0.903
b1084	rne	chr	-	1140404,	1143590,	-10.5466	-10.5522	-10.5621	-10.4253	-10.3923	-10.4921	-10.4857	-10.4754	-10.4886	-10.5529	-10.4177	-10.4837	0.054412	0.0746631	0.251657	0.285559	-0.135148	-0.0659288	0.910577	0.95533
b2260	menE	chr	-	2371669,	2373025,	-14.9635	-15.1674	-15.0239	-15.0191	-15.1437	-15.2859	-14.9255	-15.0555	-15.091	-15.046	-15.1205	-15.0209	0.376582	0.406263	0.254817	0.288845	0.0745592	0.0996548	1.05304	1.07152
b1482	osmC	chr	+	1554648,	1555080,	-14.4031	-14.5237	-14.526	-14.5302	-14.7258	-14.2971	-14.2654	-14.3348	-14.3718	-14.4772	-14.5885	-14.323	0.817876	0.836986	0.255265	0.289054	0.111246	0.265439	1.08016	1.202
b0085	murE	chr	+	93165,	94653,	-12.6107	-12.5802	-12.5615	-12.357	-12.3664	-12.5302	-12.5072	-12.5155	-12.4914	-12.5863	-12.3864	-12.504	0.089799	0.112587	0.261489	0.295491	-0.199937	-0.117618	0.870589	0.921708
b2097	fbaB	chr	-	2175533,	2176586,	-14.5083	-14.4313	-14.4653	-14.3288	-13.9906	-14.1687	-14.317	-14.3847	-14.23	-14.47	-14.122	-14.3047	0.0820887	0.105008	0.268397	0.30174	-0.347975	-0.182668	0.785686	0.881072
b1614	ydgA	chr	+	1687875,	1689384,	-11.3824	-11.312	-11.395	-11.5936	-11.6445	-11.4659	-11.4596	-11.5046	-11.502	-11.3621	-11.5997	-11.4878	0.0426334	0.060786	0.27124	0.304623	0.237525	0.111848	1.17897	1.08061
b1858	znuC	chr	+	1940685,	1941441,	-15.2094	-15.3694	-15.395	-15.0028	-14.8664	-15.2639	-15.3112	-15.0326	-15.3838	-15.3133	-14.9647	-15.2472	0.122585	0.148157	0.279213	0.313257	-0.34859	-0.282439	0.785351	0.8222
b1687	ydiJ	chr	-	1763652,	1766709,	-14.1666	-14.1327	-14.2159	-14.3648	-14.2177	-14.0229	-14.0511	-14.0555	-14.0667	-14.1691	-14.2336	-14.0579	0.793086	0.813136	0.282902	0.316423	0.0644948	0.175648	1.04572	1.12947
b1064	grxB	chr	-	1122629,	1123277,	-12.406	-12.4071	-12.4858	-12.8115	-13.0155	-12.6973	-12.7108	-12.666	-12.7554	-12.4288	-12.8946	-12.713	0.0397011	0.0573676	0.293462	0.327565	0.465828	0.181597	1.38111	1.13414
b3318	rplW	chr	-	3449403,	3449706,	-8.65796	-8.678	-8.69431	-8.69506	-8.68084	-8.622	-8.68383	-8.728	-8.68441	-8.67496	-8.67666	-8.69693	0.693441	0.715663	0.29711	0.331299	0.00169796	-0.0202713	1.00118	0.986047
b3030	parE	chr	-	3171525,	3173418,	-11.9946	-12.0541	-12.0354	-11.9154	-11.8892	-12.0022	-11.9904	-11.9756	-11.9812	-12.0259	-11.9142	-11.9828	0.0956399	0.118334	0.303405	0.337288	-0.111655	-0.068563	0.925525	0.953587
b1323	tyrR	chr	+	1384743,	1386285,	-12.542	-12.5335	-12.5049	-12.4424	-12.5189	-12.594	-12.5719	-12.5537	-12.6095	-12.5285	-12.5036	-12.5797	0.868181	0.882383	0.304109	0.337727	-0.0248812	-0.0760872	0.982902	0.948627
b2892	recJ	chr	-	3034394,	3036128,	-14.0579	-14.0781	-14.0147	-13.4956	-13.5879	-13.8245	-13.7576	-13.7592	-13.7909	-14.052	-13.5885	-13.7698	0.0471998	0.065837	0.306207	0.339712	-0.463583	-0.181368	0.725183	0.881866
b0387	yaiI	chr	+	404987,	405446,	-15.8182	-15.7091	-15.6415	-15.339	-15.6833	-15.8164	-15.806	-15.6994	-15.9157	-15.7294	-15.5763	-15.8109	0.528765	0.555127	0.307454	0.340751	-0.153122	-0.234589	0.899302	0.849927
b1103	hinT	chr	+	1161107,	1161467,	-12.7187	-12.6172	-12.6664	-12.5657	-12.6308	-12.4287	-12.688	-12.6441	-12.5459	-12.6693	-12.5773	-12.6232	0.157154	0.184442	0.318556	0.351277	-0.0920156	-0.0458845	0.938211	0.968696
b3809	dapF	chr	+	3992784,	3993609,	-13.7622	-13.7862	-13.6955	-13.6907	-13.7388	-13.6429	-13.6251	-13.8972	-13.92	-13.7506	-13.7081	-13.8037	0.214484	0.243883	0.321949	0.354662	-0.0424988	-0.0956502	0.970972	0.93585
b0427	yajR	chr	-	444525,	445890,	-15.5156	-15.4849	-15.6557	-15.8347	-15.7086	-15.6078	-15.6804	-15.6463	-15.5628	-15.5438	-15.7337	-15.6276	0.124602	0.150098	0.324115	0.356689	0.189894	0.106071	1.14068	1.07629
b3226	nanR	chr	-	3371719,	3372511,	-14.3587	-14.426	-14.4905	-14.2354	-14.2361	-14.7233	-14.7262	-14.6119	-14.4898	-14.4179	-14.2986	-14.605	0.885766	0.894754	0.326161	0.35858	-0.119303	-0.306449	0.920632	0.80863
b1208	ispE	chr	-	1261248,	1262100,	-14.5984	-14.6164	-14.5293	-14.1521	-13.9777	-14.4379	-14.3346	-14.2866	-14.4452	-14.5841	-14.0958	-14.3583	0.0946132	0.117329	0.34209	0.375339	-0.488335	-0.262492	0.712847	0.833647
b0006	yaaA	chr	-	5682,	6459,	-13.4122	-13.4352	-13.4905	-13.3648	-13.423	-13.0462	-13.4199	-13.356	-13.4866	-13.4419	-13.3416	-13.4238	0.286298	0.315706	0.347803	0.381225	-0.100341	-0.0821989	0.932813	0.944617
b0146	sfsA	chr	-	160781,	161486,	-15.0994	-14.9557	-14.9875	-15.1298	-15.3884	-14.916	-14.8731	-15.151	-14.8813	-15.0181	-15.2209	-14.9527	0.444335	0.473295	0.351773	0.385192	0.20282	0.268202	1.15095	1.20431
b1650	nemA	chr	+	1724682,	1725780,	-14.2842	-14.2029	-14.149	-13.955	-13.8195	-14.2102	-14.1726	-14.1696	-14.0571	-14.2173	-13.9167	-14.1296	0.190527	0.218457	0.352251	0.38533	-0.300595	-0.212855	0.811917	0.862828
b1529	marC	chr	-	1616266,	1616932,	-15.1067	-15.137	-15.2264	-15.5838	-15.264	-15.331	-15.1674	-15.4364	-15.1614	-15.1502	-15.3736	-15.2394	0.123387	0.148962	0.358823	0.391736	0.223402	0.134214	1.16748	1.09749
b1179	ycgL	chr	+	1226903,	1227230,	-14.2554	-14.2278	-14.2722	-14.2165	-14.2609	-14.0322	-14.1832	-14.214	-14.4578	-14.2509	-14.2099	-14.2846	0.362205	0.392688	0.362739	0.395616	-0.0410046	-0.0746522	0.971978	0.949571
b1291	sapD	chr	-	1350659,	1351652,	-15.0108	-15.0057	-14.913	-14.8787	-14.8103	-15.0603	-15.1156	-14.9128	-15.0146	-14.9805	-14.8678	-15.0176	0.51785	0.544189	0.363339	0.395877	-0.112626	-0.149738	0.924903	0.901414
b1841	yobA	chr	-	1922618,	1922993,	-13.093	-13.1488	-13.1565	-12.9609	-13.0314	-12.7926	-12.9823	-12.9688	-13.0861	-13.1295	-12.97	-13.0143	0.0924389	0.115154	0.369619	0.40192	-0.159462	-0.0442453	0.895359	0.969797
b3895	fdhD	chr	+	4084038,	4084872,	-15.5402	-15.5927	-15.5391	-15.2306	-15.1152	-15.3775	-15.4074	-15.5619	-15.1718	-15.5571	-15.1898	-15.3604	0.046785	0.0655109	0.373076	0.404874	-0.367356	-0.170617	0.775202	0.888463
b1219	ychN	chr	-	1272468,	1272822,	-13.0526	-12.9882	-12.9367	-13.0841	-13.0155	-13.2315	-13.1233	-12.9499	-13.0146	-12.9972	-13.0686	-13.0317	0.199417	0.227697	0.377976	0.409764	0.0713921	0.0368679	1.05073	1.02588
b2196	ccmF	chr	-	2290982,	2292926,	-15.6165	-15.5809	-15.7593	-15.4562	-15.5626	-15.882	-15.8391	-15.629	-15.8644	-15.6437	-15.5683	-15.7824	0.9027	0.909344	0.39845	0.430278	-0.0754713	-0.21417	0.949032	0.862042
b2744	surE	chr	-	2867534,	2868296,	-14.2925	-14.3346	-14.2371	-14.2402	-14.3413	-14.2749	-14.2486	-14.3419	-14.6541	-14.2901	-14.2969	-14.4096	0.952548	0.955165	0.403152	0.434101	0.00680636	-0.112665	1.00473	0.924878
b0008	talB	chr	+	8237,	9191,	-8.44894	-8.44392	-8.46283	-8.38896	-8.41207	-8.32421	-8.41823	-8.38913	-8.40082	-8.45123	-8.39099	-8.4034	0.0938809	0.116685	0.406594	0.437348	-0.0602342	-0.0124115	0.959108	0.991434
b1252	tonB	chr	+	1309112,	1309832,	-15.4259	-15.6651	-15.5457	-15.5597	-15.3748	-15.1384	-15.5789	-15.2531	-15.7829	-15.5363	-15.3948	-15.5393	0.268069	0.298309	0.412741	0.443089	-0.141459	-0.144479	0.906602	0.904706
b0356	frmA	chr	-	377685,	378795,	-11.0615	-11.0531	-11.0262	-11.014	-10.9819	-11.0988	-11.0318	-11.0708	-11.1046	-11.0485	-11.0094	-11.0688	0.709063	0.730408	0.42012	0.450129	-0.0390767	-0.0594148	0.973278	0.959653
b3932	hslV	chr	-	4119779,	4120310,	-12.7774	-12.7043	-12.7478	-12.8221	-12.7932	-12.8946	-12.6729	-12.7925	-12.8665	-12.7443	-12.8175	-12.7747	0.0713813	0.0934958	0.420683	0.450291	0.0732344	0.0428322	1.05207	1.03013
b4089	rpiR	chr	-	4310123,	4311014,	-14.8578	-14.7545	-14.7593	-15.0356	-15.3022	-15.3541	-15.027	-15.1265	-15.2246	-14.7944	-15.2146	-15.1242	0.035626	0.0527882	0.422455	0.451747	0.420241	0.0904042	1.33815	1.06467
b3918	cdh	chr	+	4107952,	4108708,	-14.6889	-14.6164	-14.7029	-14.8936	-14.7786	-14.5668	-14.734	-14.6904	-14.5292	-14.6683	-14.7817	-14.6455	0.510127	0.53814	0.458677	0.487622	0.113375	0.136224	1.08176	1.09903
b0655	gltI	chr	-	686061,	686970,	-14.3051	-14.3444	-14.3773	-14.6777	-14.9958	-14.7537	-14.7108	-14.7452	-14.7133	-14.3386	-14.8458	-14.7217	0.0346891	0.0516797	0.465137	0.494011	0.507255	0.12406	1.42134	1.0898
b3929	rraA	chr	-	4116867,	4117353,	-12.702	-12.7521	-12.7952	-12.652	-12.6927	-12.8653	-12.8817	-12.7925	-12.7266	-12.7449	-12.7031	-12.7987	0.86656	0.881862	0.47337	0.502268	-0.041733	-0.0956131	0.971487	0.935874
b0189	rof	chr	-	213677,	213932,	-15.4213	-15.4313	-15.3424	-15.955	-15.9001	-15.2422	-15.4325	-15.6119	-15.4705	-15.4015	-15.798	-15.497	0.318964	0.349375	0.488595	0.51792	0.396543	0.30099	1.31635	1.23199
b1624	ydgJ	chr	-	1701291,	1702332,	-14.2074	-14.1939	-14.1591	-14.1477	-14.0955	-14.1893	-14.2654	-14.0441	-14.3423	-14.1889	-14.1264	-14.2221	0.258196	0.28938	0.504763	0.533509	-0.0624963	-0.095675	0.957606	0.935834
b0199	metN	chr	-	221613,	222645,	-14.4144	-14.3199	-14.3481	-14.1298	-14.3315	-14.2422	-14.3229	-14.2531	-14.2683	-14.3634	-14.248	-14.2826	0.149916	0.177276	0.513671	0.541326	-0.115449	-0.0346486	0.923095	0.97627
b3068	mug	chr	-	3212988,	3213495,	-14.5984	-14.4767	-14.4778	-14.5538	-14.5511	-14.6936	-14.4325	-14.7452	-14.3482	-14.5222	-14.5723	-14.4855	0.258774	0.289731	0.540962	0.569023	0.0500935	0.086759	1.03533	1.06198
b3191	yrbB	chr	-	3334984,	3335278,	-15.2212	-15.3444	-15.4252	-15.121	-14.9854	-15.331	-15.027	-15.5619	-15.2246	-15.3182	-15.0771	-15.2394	0.205398	0.234282	0.542612	0.570212	-0.241036	-0.162279	0.846138	0.893612
b2475	ypfJ	chr	-	2593895,	2594759,	-14.0812	-14.0699	-14.1591	-14.4071	-14.2208	-14.0988	-14.0657	-14.0788	-14.3365	-14.0993	-14.2608	-14.1604	0.257694	0.289113	0.550344	0.576969	0.161595	0.100453	1.11852	1.07211
b2293	yfbT	chr	-	2409460,	2410111,	-14.5156	-14.6224	-14.6557	-14.7439	-14.7564	-14.916	-14.8475	-14.5867	-14.8231	-14.59	-14.7747	-14.7573	0.0444451	0.0628777	0.6281	0.655018	0.184751	0.0174201	1.13662	1.01215
b2011	sbcB	chr	+	2080779,	2082207,	-14.1533	-14.1939	-14.2185	-14.0356	-13.8569	-13.8245	-13.886	-13.8716	-14.1208	-14.1852	-13.9091	-13.9607	0.040988	0.0588228	0.633566	0.659463	-0.276126	-0.0515598	0.825806	0.964893
b3301	rplO	chr	-	3442126,	3442561,	-8.44129	-8.40244	-8.42135	-8.40009	-8.37593	-8.31375	-8.35878	-8.38369	-8.39059	-8.42256	-8.3745	-8.37737	0.137444	0.164842	0.641587	0.667177	-0.0480605	-0.00286707	0.967236	0.998015
b3850	hemG	chr	+	4032630,	4033176,	-14.3631	-14.2509	-14.2586	-14.6907	-14.3184	-14.4881	-14.4074	-14.4822	-14.439	-14.2949	-14.4584	-14.4404	0.184496	0.211986	0.656205	0.681731	0.163476	0.0179867	1.11998	1.01255
b1839	yebY	chr	-	1921388,	1921730,	-13.8718	-13.7811	-13.8341	-13.9629	-13.8855	-13.6862	-13.7816	-13.8315	-13.7948	-13.8303	-13.879	-13.8009	0.868684	0.882383	0.661385	0.686462	0.048659	0.0780978	1.0343	1.05563
b3059	ygiH	chr	+	3202715,	3203333,	-15.4122	-15.3544	-15.5325	-15.2212	-15.264	-15.6078	-15.3585	-15.5619	-15.3718	-15.4257	-15.2953	-15.4205	0.645062	0.66952	0.664676	0.689223	-0.130452	-0.125245	0.913545	0.916848
b2493	yfgO	chr	-	2612841,	2613903,	-14.2821	-14.3005	-14.3655	-14.5186	-14.6419	-14.9507	-14.7497	-14.5951	-14.5765	-14.3117	-14.6402	-14.6403	0.0893926	0.112382	0.684245	0.708174	0.32846	-0.000170321	1.25567	0.999882
b3791	rffA	chr	+	3973168,	3974299,	-12.9677	-12.9118	-12.9454	-13.0927	-12.9854	-12.8571	-13.0608	-12.7829	-12.9531	-12.9425	-13.0001	-12.9362	0.647227	0.67113	0.685856	0.709171	0.0575813	0.0639364	1.04072	1.04531
b2682	ygaZ	chr	+	2807638,	2808376,	-15.2412	-15.2485	-15.2264	-15.2594	-15.5397	-15.4014	-15.2767	-15.24	-15.5358	-15.2394	-15.4199	-15.352	0.183432	0.211207	0.710031	0.732094	0.180482	0.0678904	1.13326	1.04818
b0142	folK	chr	-	157252,	157732,	-15.435	-15.5693	-15.6204	-15.6584	-15.4371	-15.1585	-15.4325	-15.4364	-15.5765	-15.5306	-15.4602	-15.4832	0.491816	0.521335	0.709477	0.732094	-0.070397	-0.023022	0.952376	0.984169
b2477	nlpB	chr	-	2595852,	2596887,	-11.5414	-11.5097	-11.5082	-11.6858	-11.7129	-11.4833	-11.5736	-11.6463	-11.5705	-11.5213	-11.6675	-11.5935	0.274561	0.304605	0.721912	0.743644	0.14628	0.0739949	1.10671	1.05263
b1990	erfK	chr	-	2060414,	2061347,	-15.5303	-15.5181	-15.513	-16.2118	-15.9296	-15.916	-15.6072	-16.1634	-16.0619	-15.5213	-16.0157	-15.9121	0.0350849	0.0520568	0.726769	0.747943	0.494472	0.103653	1.4088	1.07449
b1727	yniC	chr	+	1807403,	1808072,	-13.373	-13.3223	-13.275	-13.1544	-13.1011	-13.4074	-13.2183	-13.3348	-13.2059	-13.3275	-13.1608	-13.2472	0.393575	0.423199	0.778106	0.798525	-0.16674	-0.0863987	0.890854	0.941871
b3858	yihD	chr	+	4040091,	4040361,	-13.3242	-13.2029	-13.3568	-13.6113	-13.6257	-13.2915	-13.3889	-13.4553	-13.5765	-13.2917	-13.5663	-13.473	0.177642	0.205621	0.787918	0.807082	0.274574	0.0933037	1.20964	1.06681
b2421	cysM	chr	-	2536693,	2537605,	-15.5501	-15.5125	-15.4747	-15.4125	-15.6583	-15.6644	-15.6955	-15.5784	-15.3482	-15.5157	-15.5723	-15.5298	0.513781	0.540952	0.789122	0.80756	0.0566068	0.0425082	1.04002	1.0299
b0839	dacC	chr	+	879949,	881152,	-12.6436	-12.6413	-12.7205	-12.5914	-12.6127	-12.5906	-12.7204	-12.629	-12.4914	-12.6644	-12.6022	-12.6088	0.105073	0.128553	0.838929	0.854139	-0.0622045	-0.0065339	0.957799	0.995481
b0611	rna	chr	-	643419,	644226,	-13.6389	-13.6729	-13.6362	-13.6425	-13.5302	-13.7384	-13.5307	-13.7313	-13.7057	-13.6493	-13.5966	-13.6493	0.858653	0.875836	0.839319	0.854139	-0.0527335	-0.0526994	0.964108	0.964131
b3438	gntR	chr	-	3575753,	3576749,	-13.7364	-13.8963	-13.767	-13.8492	-13.6728	-13.8653	-14.0033	-13.7545	-13.702	-13.7967	-13.7575	-13.8167	0.961034	0.962792	0.840655	0.854705	-0.0391624	-0.0591718	0.97322	0.959815
b2954	rdgB	chr	+	3094702,	3095296,	-13.2103	-13.2324	-13.2291	-12.9355	-13.0515	-13.1484	-13.0633	-13.0017	-13.1158	-13.223	-13.0253	-13.0631	0.0990741	0.121758	0.84238	0.855664	-0.197684	-0.0377273	0.871949	0.974188
b1491	yddW	chr	-	1565527,	1566847,	-14.4327	-14.4605	-14.3921	-14.7038	-14.4729	-14.4754	-14.6507	-14.5135	-14.439	-14.4301	-14.5464	-14.5321	0.247675	0.279016	0.876894	0.88825	0.116324	0.0142536	1.08397	1.00993
b4178	nsrR	chr	+	4404212,	4404638,	-14.8485	-14.7946	-14.7631	-15.3911	-15.138	-14.9684	-14.8991	-15.3631	-15.1512	-14.8057	-15.1898	-15.1136	0.0921291	0.114899	0.884888	0.895519	0.38406	0.0762031	1.30501	1.05424
b1723	pfkB	chr	+	1804393,	1805323,	-13.0403	-13.1041	-13.1795	-13.3493	-13.348	-13.2102	-13.2375	-13.3524	-13.2963	-13.1003	-13.3271	-13.2916	0.034451	0.0513949	0.907433	0.916641	0.226817	0.0355184	1.17025	1.02493
b1108	ycfP	chr	+	1164365,	1164908,	-13.0316	-13.2006	-13.1718	-13.0481	-13.0556	-13.0603	-12.9916	-13.07	-13.1133	-13.1259	-13.0538	-13.0571	0.264965	0.295454	0.928625	0.937183	-0.0721282	-0.00327702	0.951234	0.997731
b3980	tufB	chr	+	4173966,	4175151,	-6.36919	-6.38579	-6.36714	-6.26661	-6.22948	-6.41185	-6.33761	-6.30229	-6.28499	-6.3741	-6.26766	-6.3083	0.327755	0.357107	0.929937	0.937644	-0.106435	-0.0406418	0.928881	0.972222
b4159	yjeP	chr	-	4384069,	4387393,	-14.463	-14.5069	-14.4842	-14.7304	-14.6338	-14.5804	-14.593	-14.6638	-14.676	-14.4835	-14.6571	-14.6429	0.0555813	0.0758872	0.942983	0.94905	0.173567	0.0142221	1.12784	1.00991
b3031	yqiA	chr	-	3173446,	3174028,	-15.3587	-15.3444	-15.2264	-15.2594	-15.416	-15.6078	-15.4074	-15.3489	-15.5093	-15.3149	-15.3877	-15.4249	0.367741	0.398295	0.961328	0.964852	0.072767	-0.0371905	1.05173	0.974551
b2410	yfeH	chr	+	2524967,	2525966,	-14.7027	-14.9036	-14.9345	-15.0949	-14.9649	-15.2859	-15.0462	-15.214	-15.0715	-14.832	-15.0517	-15.103	0.089746	0.112587	0.967966	0.970626	0.21965	-0.0512657	1.16445	0.965089
b1114	mfd	chr	-	1169740,	1173187,	-12.7124	-12.7155	-12.7651	-12.5747	-12.5694	-12.6936	-12.7185	-12.6098	-12.5143	-12.7284	-12.589	-12.6113	0.0835869	0.106434	0.982959	0.984221	-0.139398	-0.0223075	0.907898	0.984657
b3461	rpoH	chr	-	3597951,	3598806,	-11.522	-11.4839	-11.5403	-11.5545	-11.6854	-11.577	-11.5392	-11.6365	-11.6396	-11.5144	-11.6242	-11.6028	0.142544	0.170176	0.993011	0.993011	0.109792	0.0213503	1.07907	1.01491
Below are not complemented (and so no t-tests were performed)
b0009	mog	chr	+	9305,	9893,	-12.6563	-12.7447	-12.6836	-13.0398	-13.0969	-13.0229	-13.1595	-13.3071	-13.1744	-12.693	-13.0665	-13.2069
b0014	dnaK	chr	+	12162,	14079,	-9.16873	-9.20675	-9.17315	-8.52547	-8.52803	-8.53164	-8.51656	-8.50047	-8.51643	-9.18254	-8.52771	-8.51175
b0016	insL	chr	+	15444,	16557,	-14.9635	-15.0658	-14.8793	-15.011	-15.3282	-14.7691	-15.3465	-15.6638	-15.4578	-14.9715	-15.1235	-15.4741
b0019	nhaA	chr	+	17488,	18655,	-12.7951	-12.6838	-12.7384	-13.046	-13.0597	-13.0699	-13.1806	-13.356	-13.3134	-12.7411	-13.0566	-13.2776
b0029	ispH	chr	+	26276,	27227,	-12.8182	-12.8489	-12.8061	-12.4493	-12.4856	-12.4913	-12.1939	-12.2782	-12.2532	-12.8248	-12.4742	-12.2394
b0031	dapB	chr	+	28373,	29195,	-13.0298	-12.9266	-12.9141	-12.7439	-12.6501	-12.8653	-12.5206	-12.5846	-12.6095	-12.9614	-12.7114	-12.5706
b0050	apaG	chr	-	51228,	51606,	-15.4489	-15.8219	-15.4621	-16.1748	-16.3151	-16.1384	-16.6215	-16.3489	-16.8313	-15.5667	-16.2399	-16.6025
b0055	djlA	chr	+	57363,	58179,	-13.8167	-13.8014	-13.7158	-14.0906	-14.0597	-14.0045	-14.3054	-14.3631	-14.2907	-13.7821	-14.0615	-14.3169
b0059	hepA	chr	-	60357,	63264,	-11.13	-11.1327	-11.055	-11.0938	-11.1187	-11.1623	-11.7806	-11.7464	-11.7919	-11.109	-11.1167	-11.7744
b0083	ftsL	chr	+	91031,	91397,	-15.4914	-15.3847	-15.4252	-15.6457	-15.7966	-15.4754	-15.6955	-16.0671	-15.8644	-15.4362	-15.6938	-15.8576
b0084	ftsI	chr	+	91412,	93179,	-13.159	-13.1434	-13.1654	-13.5215	-13.5283	-13.6009	-13.7616	-13.6949	-13.7246	-13.1556	-13.5366	-13.7285
b0086	murF	chr	+	94649,	96008,	-13.0255	-13.0936	-13.1216	-12.7991	-12.7421	-12.7499	-12.484	-12.5037	-12.4963	-13.0751	-12.7621	-12.4942
b0090	murG	chr	+	99643,	100711,	-14.0975	-14.0926	-14.0033	-14.5128	-14.4985	-14.6078	-14.5443	-14.6119	-14.7438	-14.0683	-14.519	-14.6327
b0092	ddlB	chr	+	102232,	103153,	-13.6576	-13.7075	-13.5441	-13.2594	-13.3613	-13.3027	-13.3376	-13.1696	-13.19	-13.6402	-13.3178	-13.2336
b0093	ftsQ	chr	+	103154,	103985,	-14.711	-14.7744	-14.7252	-14.9087	-14.9197	-14.6789	-15.1258	-15.0906	-15.0619	-14.7359	-14.8777	-15.0924
b0096	lpxC	chr	+	106556,	107474,	-10.1233	-10.1044	-10.1265	-10.2709	-10.3125	-10.3289	-10.3713	-10.4251	-10.418	-10.1179	-10.3009	-10.4036
b0097	secM	chr	+	107704,	108217,	-14.5205	-14.3694	-14.416	-14.4342	-14.299	-14.4881	-13.8602	-14.0788	-13.7829	-14.4389	-14.3701	-13.8922
b0104	guaC	chr	+	113443,	114487,	-10.7027	-10.722	-10.7296	-11.556	-11.5454	-11.5534	-12.0474	-12.0642	-12.08	-10.7168	-11.5501	-12.0639
b0109	nadC	chr	-	117751,	118645,	-13.8378	-13.8963	-13.8647	-13.8675	-13.8172	-13.746	-13.647	-13.4289	-13.5696	-13.8648	-13.8229	-13.5524
b0115	aceF	chr	+	125694,	127587,	-8.69203	-8.68431	-8.67659	-8.67919	-8.68786	-8.79012	-9.39695	-9.37612	-9.38889	-8.68502	-8.69966	-9.38792
b0116	lpd	chr	+	127911,	129336,	-8.40454	-8.41581	-8.40682	-8.27148	-8.26517	-8.35063	-8.1671	-8.15637	-8.15941	-8.40893	-8.27966	-8.16119
b0118	acnB	chr	+	131614,	134212,	-9.22105	-9.22624	-9.25042	-8.98697	-8.97118	-9.04208	-8.23575	-8.22337	-8.23178	-9.23114	-8.98678	-8.23068
b0122	yacC	chr	-	136569,	136917,	-15.303	-15.2957	-15.1692	-15.9867	-15.5549	-15.5534	-16.7735	-17.0213	-16.141	-15.261	-15.6851	-16.573
b0123	cueO	chr	+	137082,	138633,	-13.7752	-13.7628	-13.6918	-13.8383	-13.8195	-13.7614	-13.8224	-13.8414	-14.038	-13.7468	-13.817	-13.9013
b0128	yadH	chr	+	143701,	144472,	-13.6861	-13.7043	-13.5894	-13.7921	-13.7454	-14.1484	-13.9525	-14.1205	-14.141	-13.6637	-13.8146	-14.0665
b0131	panD	chr	-	146313,	146694,	-12.0482	-12.0415	-12.0477	-12.5567	-12.5762	-12.6044	-12.7775	-12.8094	-12.8069	-12.0458	-12.5738	-12.7973
b0134	panB	chr	-	148806,	149601,	-11.508	-11.5174	-11.5187	-11.5952	-11.553	-11.7479	-11.706	-11.7279	-11.7819	-11.5142	-11.5946	-11.7391
b0144	yadB	chr	-	159185,	160082,	-15.7251	-15.6406	-15.7593	-15.6206	-15.7966	-15.9507	-16.1993	-15.9552	-16.2246	-15.7059	-15.7563	-16.1314
b0145	dksA	chr	-	160148,	160604,	-9.96019	-9.96159	-9.99507	-10.1629	-10.217	-10.0119	-10.1816	-10.2176	-10.2508	-9.97056	-10.1667	-10.2165
b0148	hrpB	chr	+	162104,	164534,	-14.9306	-15.0136	-14.8061	-14.8639	-14.9598	-15.3083	-15.4972	-15.4978	-15.3718	-14.9202	-14.9727	-15.4515
b0149	mrcB	chr	+	164729,	167264,	-13.5095	-13.3745	-13.3891	-13.6144	-13.6521	-13.8407	-14.0318	-13.8514	-14.038	-13.4288	-13.6657	-13.9783
b0150	fhuA	chr	+	167483,	169727,	-14.7855	-14.6589	-14.7177	-15.3288	-15.4513	-15.6359	-16.5105	-16.629	-16.5093	-14.723	-15.4344	-16.544
b0155	clcA	chr	+	175106,	176528,	-14.5779	-14.662	-14.6486	-14.7104	-14.9296	-14.4881	-15.1361	-15.0101	-14.8898	-14.6256	-14.7817	-15.0077
b0159	mtn	chr	-	178454,	179153,	-10.738	-10.7216	-10.7358	-11.0565	-11.0851	-11.1271	-11.2831	-11.2883	-11.2872	-10.7319	-11.0816	-11.2861
b0160	dgt	chr	+	179236,	180754,	-15.3327	-15.5635	-15.3832	-15.8347	-15.8521	-15.1998	-16.0559	-16.0441	-15.8644	-15.4205	-15.7292	-15.9815
b0161	degP	chr	+	180883,	182308,	-11.2679	-11.2855	-11.2258	-10.7333	-10.7296	-10.7975	-10.2406	-10.2681	-10.2907	-11.2615	-10.7407	-10.2664
b0166	dapD	chr	-	185122,	185947,	-10.4548	-10.4458	-10.4573	-10.3458	-10.378	-10.3005	-10.1406	-10.2071	-10.1698	-10.4525	-10.3555	-10.1704
b0169	rpsB	chr	+	189873,	190599,	-7.02021	-7.04214	-7.05728	-7.0735	-7.04037	-7.02859	-7.58678	-7.57167	-7.59064	-7.03804	-7.04959	-7.58367
b0172	frr	chr	+	192871,	193429,	-10.3799	-10.3864	-10.3984	-9.99174	-10.0118	-10.0861	-9.92248	-9.90174	-9.8231	-10.3874	-10.0158	-9.88035
b0174	ispU	chr	+	194902,	195664,	-13.2005	-13.0627	-13.1265	-13.5419	-13.5171	-13.5269	-14.0222	-14.2598	-14.23	-13.1323	-13.5268	-14.1622
b0175	cdsA	chr	+	195676,	196534,	-13.0368	-12.9174	-12.9641	-13.1343	-12.9611	-13.0137	-13.2795	-13.2076	-13.3808	-12.9753	-13.0246	-13.2926
b0176	rseP	chr	+	196545,	197898,	-13.0246	-13.0395	-12.9931	-13.4452	-13.4004	-13.3599	-13.7816	-13.9552	-14.0053	-13.0204	-13.4091	-13.909
b0177	yaeT	chr	+	197927,	200360,	-9.89267	-9.88399	-9.88449	-9.88822	-9.91508	-9.94633	-9.97249	-9.96944	-9.94197	-9.88743	-9.91062	-9.96067
b0178	skp	chr	+	200481,	200967,	-9.45688	-9.42602	-9.50332	-9.90991	-9.98089	-9.86378	-9.99217	-9.96334	-10.0222	-9.4596	-9.93908	-9.99413
b0184	dnaE	chr	+	205125,	208608,	-12.8851	-13.0325	-12.8918	-12.8347	-12.9459	-13.0322	-13.2739	-13.414	-13.23	-12.9344	-12.9199	-13.2976
b0192	nlpE	chr	+	215268,	215979,	-14.4122	-14.4182	-14.4684	-14.1978	-14.43	-14.2859	-14.3054	-14.2598	-14.23	-14.4301	-14.3271	-14.2648
b0196	rcsF	chr	-	219590,	219995,	-12.6972	-12.6467	-12.6239	-13.0377	-13.0141	-12.7575	-13.0486	-13.1821	-13.177	-12.659	-12.9806	-13.1323
b0197	metQ	chr	-	220112,	220928,	-12.3151	-12.2526	-12.3048	-12.3288	-12.438	-12.2129	-12.5222	-12.5375	-12.5225	-12.2911	-12.3658	-12.5268
b0198	metI	chr	-	220967,	221621,	-15.0212	-15.1586	-15.0612	-15.5361	-15.0434	-15.0415	-15.6507	-15.7359	-15.4203	-15.0772	-15.1898	-15.5877
b0200	gmhB	chr	+	222832,	223408,	-13.7435	-13.7644	-13.7555	-13.6206	-13.5958	-13.6717	-13.5172	-13.5456	-13.5662	-13.7539	-13.6151	-13.5428
b0223	yafJ	chr	+	244326,	245094,	-15.004	-15.0097	-15.1191	-14.9948	-14.9547	-15.0229	-14.9708	-14.9128	-14.8898	-15.038	-14.978	-14.9245
b0224	yafK	chr	-	245064,	245805,	-13.2514	-13.2897	-13.2478	-13.2691	-13.2453	-13.2749	-14.0805	-14.1387	-14.1258	-13.263	-13.2576	-14.1136
b0226	dinJ	chr	-	246241,	246502,	-13.9339	-13.9652	-13.9987	-14.9787	-15.0597	-14.6078	-15.1993	-15.4515	-15.0812	-13.9626	-14.9568	-15.224
b0237	pepD	chr	-	254258,	255716,	-10.4516	-10.4646	-10.4455	-10.0687	-10.1067	-10.1166	-10.0762	-10.0466	-10.0764	-10.4541	-10.0953	-10.0674
b0240	crl	chr	+	257828,	258230,	-13.3019	-13.4458	-13.398	-12.652	-12.7586	-12.7196	-12.7399	-12.6994	-12.62	-13.376	-12.7164	-12.6844
b0243	proA	chr	+	260726,	261980,	-12.6283	-12.5766	-12.6441	-12.5523	-12.5617	-12.6183	-12.3966	-12.4725	-12.461	-12.6154	-12.5668	-12.4415
b4587	insN	chr	+	269501,	271413,	-15.0994	-15.0822	-15.275	-15.3493	-15.4585	-15.0988	-15.027	-15.4214	-15.5225	-15.1416	-15.3632	-15.3027
b0268	yagE	chr	+	281480,	282410,	-14.4099	-14.4	-14.3861	-14.1932	-14.2766	-14.0322	-12.91	-12.9286	-12.9892	-14.3998	-14.2099	-12.9432
b0269	yagF	chr	+	282424,	284392,	-15.2739	-15.2814	-15.1591	-15.1477	-15.2392	-15.2639	-13.8645	-13.9769	-14.0428	-15.2425	-15.2115	-13.9591
b0281	intF	chr	-	294919,	296320,	-13.7738	-13.8151	-13.8545	-14.1794	-14.0761	-14.0229	-14.2938	-14.3209	-14.4081	-13.8103	-14.1016	-14.3416
b0312	betB	chr	-	326484,	327957,	-14.4076	-14.578	-14.6379	-14.3187	-14.3681	-14.3196	-14.0127	-14.1205	-14.1666	-14.5269	-14.3442	-14.0977
b0315	yahA	chr	+	331594,	332683,	-14.8152	-14.8323	-14.9389	-14.8936	-15.0706	-14.9863	-15.8731	-15.8716	-15.7829	-14.8554	-14.9967	-15.8399
b0336	codB	chr	+	354145,	355405,	-12.7928	-12.7059	-12.7982	-13.1432	-13.1744	-12.9074	-13.3112	-13.2076	-13.2935	-12.7649	-13.1213	-13.2737
b0344	lacZ	chr	-	362454,	365529,	-12.8378	-12.9491	-12.9841	-13.7071	-13.6728	-13.5009	-13.7775	-13.9076	-13.8561	-12.9153	-13.6571	-13.8429
b0354	yaiL	chr	+	375995,	376535,	-13.489	-13.4781	-13.4405	-13.426	-13.5133	-13.5269	-13.8688	-13.9286	-13.9778	-13.4713	-13.4855	-13.9245
b0369	hemB	chr	-	387976,	388951,	-10.7437	-10.6838	-10.673	-10.9059	-10.9031	-10.992	-11.0027	-11.0066	-11.031	-10.7032	-10.9169	-11.0138
b0376	ampH	chr	-	394353,	395511,	-14.5855	-14.6104	-14.513	-14.7237	-14.6833	-14.5009	-14.734	-14.629	-14.6834	-14.5725	-14.6678	-14.6844
b0377	sbmA	chr	+	395862,	397083,	-15.2656	-15.4104	-15.3597	-15.8061	-15.6177	-15.6644	-15.8391	-15.9769	-16.2246	-15.3394	-15.6851	-16.0077
b0378	yaiW	chr	+	397095,	398190,	-15.1177	-14.9481	-15.0899	-15.1123	-15.0542	-15.179	-15.2996	-15.3631	-15.2907	-15.0514	-15.0915	-15.3148
b0381	ddlA	chr	-	399052,	400147,	-11.4574	-11.3773	-11.4598	-11.7162	-11.7509	-11.7121	-11.9536	-11.9352	-11.9744	-11.431	-11.7334	-11.9555
b0397	sbcC	chr	-	411830,	414977,	-13.8532	-13.8765	-13.9785	-14.1978	-14.4091	-14.5009	-14.484	-14.7639	-14.7593	-13.8959	-14.3476	-14.6583
b0401	brnQ	chr	+	418814,	420134,	-12.9552	-12.9747	-13.0158	-13.4479	-13.343	-13.5204	-13.6215	-13.5619	-13.5093	-12.9789	-13.4028	-13.5633
b0402	proY	chr	+	420209,	421583,	-13.3327	-13.2602	-13.2532	-13.5244	-13.644	-13.6501	-13.9167	-14.0965	-14.2032	-13.2854	-13.6038	-14.0665
b0407	yajC	chr	+	426510,	426843,	-10.3635	-10.3273	-10.3895	-10.556	-10.5513	-10.5343	-10.6279	-10.6178	-10.6029	-10.3587	-10.5504	-10.616
b0408	secD	chr	+	426870,	428718,	-11.2255	-11.2026	-11.1914	-11.2832	-11.2446	-11.4014	-11.3083	-11.3984	-11.3177	-11.208	-11.2798	-11.3377
b0411	tsx	chr	-	430352,	431237,	-9.12184	-9.15964	-9.09253	-8.88974	-8.88214	-8.9346	-8.70255	-8.67912	-8.68928	-9.12577	-8.89236	-8.69089
b0416	nusB	chr	+	434360,	434780,	-11.6999	-11.6744	-11.6854	-11.6825	-11.8103	-11.8407	-12.5206	-12.4553	-12.5594	-11.6873	-11.7707	-12.5145
b0422	xseB	chr	-	440324,	440567,	-15.6113	-15.7028	-15.7365	-15.8204	-15.4875	-15.916	-15.7418	-16.0906	-16.1822	-15.6766	-15.6507	-15.988
b0426	yajQ	chr	+	443906,	444398,	-10.4365	-10.4673	-10.4721	-10.837	-10.8166	-10.7271	-10.9898	-11.0031	-11.0493	-10.4568	-10.8097	-11.0147
b0428	cyoE	chr	-	446038,	446929,	-13.1705	-13.2649	-13.1667	-12.6907	-12.6593	-12.8084	-11.5113	-11.5375	-11.5267	-13.2001	-12.6911	-11.5245
b0429	cyoD	chr	-	446940,	447270,	-12.8485	-12.8702	-12.745	-12.0294	-12.0679	-12.1185	-10.7199	-10.7079	-10.7166	-12.8251	-12.0622	-10.7152
b0430	cyoC	chr	-	447269,	447884,	-11.9065	-11.8814	-11.8041	-11.1527	-11.0945	-11.1013	-9.67995	-9.70109	-9.65952	-11.8682	-11.1147	-9.67883
b0431	cyoB	chr	-	447873,	449865,	-10.5077	-10.5176	-10.4555	-10.141	-10.129	-10.1573	-9.34224	-9.35644	-9.37613	-10.4958	-10.1372	-9.35841
b0432	cyoA	chr	-	449886,	450834,	-10.9278	-10.9561	-10.9819	-10.8061	-10.7781	-10.7065	-9.98955	-9.97899	-9.97527	-10.9525	-10.7765	-9.98134
b0434	yajG	chr	-	452812,	453391,	-11.0778	-11.0581	-11.0474	-11.097	-11.1437	-11.0521	-11.4588	-11.4233	-11.4327	-11.0625	-11.1141	-11.439
b0441	ppiD	chr	+	461138,	463010,	-10.3813	-10.3698	-10.3747	-10.8625	-10.8046	-10.7828	-10.98	-10.9004	-10.9631	-10.3756	-10.8204	-10.9501
b0448	mdlA	chr	+	468094,	469867,	-15.627	-15.7349	-15.6773	-15.7921	-15.6257	-15.8488	-16.4074	-16.3209	-16.2463	-15.6766	-15.7114	-16.323
b0452	tesB	chr	-	473524,	474385,	-14.0316	-13.9164	-14.066	-13.9867	-13.9074	-14.0415	-13.9754	-13.9606	-13.8561	-14.0018	-13.9529	-13.9276
b0453	ybaY	chr	+	474602,	475175,	-14.711	-14.7778	-14.7555	-14.6777	-14.6137	-14.7847	-14.3229	-14.2731	-14.1822	-14.7457	-14.6592	-14.2569
b0459	maa	chr	-	478590,	479142,	-12.5977	-12.6001	-12.5707	-13.3911	-13.3038	-13.2208	-13.6143	-13.5335	-13.6396	-12.5907	-13.3195	-13.5988
b0462	acrB	chr	-	480477,	483627,	-10.536	-10.5249	-10.5122	-10.6528	-10.7119	-10.7384	-10.7796	-10.8016	-10.8818	-10.5255	-10.6957	-10.8217
b0463	acrA	chr	-	483649,	484843,	-10.8835	-10.838	-10.8767	-11.2906	-11.2933	-11.3013	-11.5197	-11.5385	-11.5859	-10.8663	-11.2936	-11.5485
b0465	kefA	chr	+	485759,	489122,	-12.6536	-12.6482	-12.6737	-12.7422	-12.8001	-12.7614	-13.0511	-13.3419	-13.322	-12.6575	-12.7747	-13.2269
b0470	dnaX	chr	+	491315,	493247,	-13.5439	-13.5853	-13.4358	-13.7712	-13.6624	-13.8005	-14.0033	-13.9715	-13.9464	-13.5255	-13.7181	-13.9735
b0481	ybaK	chr	-	505826,	506306,	-13.5291	-13.489	-13.69	-14.0356	-14.167	-13.9332	-14.1993	-14.2799	-14.3307	-13.5595	-14.0857	-14.2687
b0506	allR	chr	+	532234,	533050,	-13.4224	-13.5463	-13.3266	-13.0734	-13.1466	-13.2155	-13.0657	-13.1235	-13.0886	-13.4336	-13.1316	-13.0907
b0524	lpxH	chr	-	552440,	553163,	-15.3897	-15.5693	-15.6135	-15.3911	-15.4948	-15.6936	-16.3346	-16.0906	-16.3134	-15.5101	-15.4865	-16.2511
b0528	ybcJ	chr	-	555883,	556096,	-14.2412	-14.3669	-14.2613	-14.4507	-14.7044	-14.916	-15.1993	-15.1265	-14.9598	-14.2877	-14.6423	-15.089
b0543	emrE	chr	+	567537,	567870,	-14.4724	-14.3321	-14.3481	-14.4562	-14.7345	-14.6501	-15.027	-15.5456	-14.9598	-14.3887	-14.6234	-15.135
b0557	borD	chr	-	577822,	578116,	-9.97939	-10.031	-10.0362	-10.1071	-10.1223	-9.87992	-10.167	-10.2461	-10.2192	-10.0126	-10.0786	-10.2086
b0568	nfrA	chr	-	587204,	590177,	-14.8394	-14.7414	-14.714	-15.2024	-15.0706	-15.4256	-15.2996	-15.7176	-15.2907	-14.7698	-15.1623	-15.4074
b0577	ybdG	chr	-	602638,	603886,	-13.768	-13.7155	-13.7593	-14.3441	-14.264	-14.2859	-14.6655	-14.5295	-14.5903	-13.7479	-14.2936	-14.5976
b0578	nfsB	chr	-	603993,	604647,	-11.519	-11.5139	-11.5313	-11.5456	-11.5222	-11.522	-11.7175	-11.6693	-11.7486	-11.5208	-11.53	-11.714
b0582	insL	chr	+	607287,	608400,	-15.2697	-15.2719	-15.1795	-15.5128	-15.4802	-15.331	-15.5649	-15.8119	-16.0053	-15.244	-15.4677	-15.7824
b0606	ahpF	chr	+	638975,	640541,	-10.4034	-10.4036	-10.395	-10.3961	-10.3848	-10.4165	-10.2756	-10.2892	-10.2219	-10.4011	-10.3932	-10.2602
b0623	cspE	chr	+	656514,	656724,	-8.47661	-8.50573	-8.54763	-8.91717	-8.89324	-8.76936	-9.17858	-9.15598	-9.20706	-8.50635	-8.88201	-9.18189
b0627	tatE	chr	+	658169,	658373,	-14.4606	-14.4525	-14.6204	-14.4507	-14.3714	-14.3894	-14.317	-14.3002	-14.3959	-14.5018	-14.4001	-14.3395
b0628	lipA	chr	-	658473,	659439,	-10.5203	-10.5111	-10.5598	-10.591	-10.5941	-10.5451	-11.103	-11.0686	-11.0898	-10.5284	-10.5857	-11.0881
b0631	ybeD	chr	-	661601,	661865,	-13.411	-13.3186	-13.3714	-13.2814	-13.3347	-13.0462	-12.9167	-12.9207	-12.8561	-13.3684	-13.2706	-12.896
b0633	rlpA	chr	-	663324,	664413,	-12.159	-12.2018	-12.168	-12.5807	-12.5968	-12.6501	-12.6378	-12.6376	-12.5628	-12.1757	-12.5992	-12.6106
b0634	mrdB	chr	-	664423,	665536,	-13.1762	-13.1806	-13.2067	-13.4701	-13.3597	-13.3425	-13.558	-13.5619	-13.5093	-13.1863	-13.393	-13.5417
b0659	ybeY	chr	-	691096,	691564,	-15.3157	-15.2625	-15.2805	-14.3545	-14.4585	-14.4881	-14.3287	-14.4822	-14.4578	-15.2877	-14.4271	-14.4183
b0662	ubiF	chr	+	694323,	695499,	-13.1878	-13.2861	-13.2438	-13.0671	-13.0207	-13.1739	-12.9502	-12.8615	-12.9756	-13.236	-13.058	-12.9323
b0675	nagD	chr	-	698796,	699549,	-12.693	-12.7553	-12.7962	-12.851	-13.0247	-13.0322	-13.1542	-13.1634	-13.2573	-12.7427	-12.9654	-13.1928
b0684	fldA	chr	-	710157,	710688,	-10.5665	-10.5646	-10.6104	-10.5815	-10.5564	-10.6192	-10.7166	-10.6787	-10.7227	-10.5783	-10.5739	-10.7075
b0695	kdpD	chr	-	720952,	723637,	-15.9769	-15.8289	-15.7289	-16.1932	-15.9802	-16.179	-16.0955	-16.2664	-16.1009	-15.853	-16.0771	-16.1458
b0710	ybgI	chr	+	742049,	742793,	-12.4783	-12.4319	-12.4889	-12.3326	-12.3463	-12.3894	-11.9605	-12.0657	-11.9431	-12.4657	-12.348	-11.9844
b0720	gltA	chr	-	752407,	753691,	-11.4469	-11.4565	-11.4358	-10.9336	-10.9271	-10.8852	-9.53491	-9.53324	-9.52894	-11.4469	-10.923	-9.53229
b0723	sdhA	chr	+	755129,	756896,	-11.0837	-11.0989	-11.0999	-10.9777	-11.0046	-11.0879	-9.25468	-9.24449	-9.2628	-11.0934	-11.0076	-9.25454
b0724	sdhB	chr	+	756911,	757628,	-12.5205	-12.4904	-12.6022	-11.8483	-11.9566	-12.0022	-10.0799	-10.0351	-10.0443	-12.5332	-11.926	-10.0539
b0726	sucA	chr	+	757928,	760730,	-10.5873	-10.6045	-10.6141	-10.0935	-10.1216	-10.1623	-9.06709	-9.06659	-9.0447	-10.6006	-10.1181	-9.05894
b0727	sucB	chr	+	760744,	761962,	-9.45287	-9.46507	-9.44286	-8.53771	-8.49459	-8.60459	-7.78541	-7.7635	-7.73881	-9.45403	-8.52482	-7.76225
b0728	sucC	chr	+	762236,	763403,	-10.4532	-10.4992	-10.4852	-9.58945	-9.65858	-9.74365	-8.4662	-8.4529	-8.43846	-10.4775	-9.64723	-8.45237
b0729	sucD	chr	+	763402,	764272,	-11.008	-11.0407	-11.0343	-10.0605	-10.0595	-10.0603	-8.86024	-8.84407	-8.81117	-11.0263	-10.06	-8.83787
b0733	cydA	chr	+	770680,	772249,	-7.83706	-7.83566	-7.85079	-8.51839	-8.49241	-8.52262	-9.19694	-9.17584	-9.18054	-7.84051	-8.50551	-9.18486
b0734	cydB	chr	+	772264,	773404,	-8.55584	-8.58076	-8.54168	-9.44756	-9.39496	-9.45458	-9.97536	-9.94251	-9.93728	-8.55999	-9.42113	-9.95203
b4515	ybgT	chr	+	773418,	773532,	-11.6861	-11.6609	-11.7718	-12.7764	-12.7542	-12.6394	-13.2375	-13.2765	-13.3394	-11.7016	-12.7438	-13.2846
b0735	ybgE	chr	+	773531,	773825,	-13.9274	-13.9843	-13.896	-14.1035	-13.9172	-13.8989	-15.3465	-15.7545	-15.7515	-13.9369	-13.974	-15.5976
b0736	ybgC	chr	+	773974,	774379,	-14.8062	-14.7155	-14.8834	-14.9317	-14.6707	-15.0795	-15.7576	-15.4515	-15.4578	-14.7967	-14.8098	-15.5536
b0737	tolQ	chr	+	774375,	775068,	-12.9536	-12.8909	-12.871	-13.2716	-13.2484	-13.094	-13.6507	-13.655	-13.6325	-12.9086	-13.232	-13.6455
b0739	tolA	chr	+	775564,	776830,	-13.7237	-13.6254	-13.6083	-14.3288	-14.3748	-13.9863	-14.98	-15.0788	-15.1512	-13.657	-14.2953	-15.0682
b0740	tolB	chr	+	776962,	778255,	-10.0622	-10.0271	-10.0528	-10.1603	-10.1993	-10.2653	-10.3912	-10.3806	-10.3891	-10.0478	-10.1957	-10.3873
b0741	pal	chr	+	778289,	778811,	-9.37267	-9.37251	-9.41643	-9.5779	-9.55999	-9.61348	-9.72284	-9.67122	-9.71351	-9.38502	-9.5738	-9.70413
b0754	aroG	chr	+	784855,	785908,	-13.3146	-13.3732	-13.3266	-13.1589	-13.1194	-13.2208	-12.9731	-12.9797	-13.0812	-13.3373	-13.1472	-13.0126
b0756	galM	chr	-	787019,	788060,	-12.4789	-12.4904	-12.4198	-12.1432	-12.0809	-12.253	-11.546	-11.5722	-11.5585	-12.4655	-12.1261	-11.5581
b0757	galK	chr	-	788053,	789202,	-11.9129	-11.9197	-11.9438	-11.8419	-11.8922	-11.9818	-10.9599	-10.9886	-10.9984	-11.9239	-11.888	-10.9819
b0759	galE	chr	-	790261,	791278,	-11.5029	-11.473	-11.4885	-11.4458	-11.4437	-11.4059	-11.1779	-11.2548	-11.2293	-11.4888	-11.4388	-11.2185
b0760	modF	chr	-	791538,	793011,	-15.8242	-15.9595	-15.7066	-15.8639	-16.0651	-15.9863	-16.458	-16.0213	-15.9688	-15.832	-15.9833	-16.1386
b0763	modA	chr	+	794311,	795085,	-13.2423	-13.3211	-13.3266	-13.4673	-13.6399	-13.6429	-13.8602	-13.8365	-13.7671	-13.2921	-13.5803	-13.8195
b0767	pgl	chr	+	797808,	798804,	-12.0294	-12.0709	-12.0935	-11.8852	-11.7708	-11.8633	-11.6729	-11.7394	-11.7342	-12.0613	-11.8217	-11.714
b0772	ybhC	chr	-	805220,	806504,	-11.5455	-11.5704	-11.583	-11.3766	-11.4393	-11.3835	-11.3966	-11.334	-11.3607	-11.5644	-11.4097	-11.3651
b0779	uvrB	chr	+	812748,	814770,	-13.35	-13.3707	-13.3424	-13.3674	-13.5435	-13.5736	-13.7937	-13.6726	-13.9553	-13.3547	-13.4865	-13.8109
b0781	moaA	chr	+	816266,	817256,	-14.0903	-14.1242	-14.0707	-14.5597	-14.5978	-14.6789	-15.0657	-15.151	-15.2032	-14.0958	-14.5966	-15.1386
b0783	moaC	chr	+	817792,	818278,	-13.4653	-13.413	-13.5114	-14.2354	-14.3546	-14.0795	-14.484	-14.5867	-14.5696	-13.4606	-14.2706	-14.544
b0784	moaD	chr	+	818270,	818516,	-14.7222	-14.4822	-14.6737	-14.9948	-14.9751	-15.0988	-15.4452	-15.2934	-15.3718	-14.6246	-14.9994	-15.3731
b0785	moaE	chr	+	818517,	818970,	-14.3763	-14.337	-14.2722	-14.5419	-14.5781	-14.594	-14.9708	-15.0441	-15.0812	-14.3328	-14.5683	-15.0309
b0786	ybhL	chr	+	819106,	819811,	-12.303	-12.2514	-12.3517	-12.6159	-12.463	-12.3687	-12.4906	-12.5037	-12.4737	-12.2993	-12.4974	-12.4884
b0814	ompX	chr	+	849672,	850188,	-7.74593	-7.68846	-7.70743	-8.07709	-8.06817	-8.05192	-8.80071	-8.85485	-8.83717	-7.71557	-8.06872	-8.82948
b0817	mntR	chr	+	852405,	852873,	-14.7251	-14.8151	-14.6521	-14.7507	-14.8195	-14.8325	-15.0175	-14.7452	-14.907	-14.7327	-14.798	-14.8937
b0827	moeA	chr	-	864351,	865587,	-11.6573	-11.6964	-11.6117	-11.8365	-11.8753	-11.8612	-11.9765	-11.992	-11.9354	-11.6569	-11.8601	-11.9663
b0833	yliE	chr	+	872201,	874550,	-15.5551	-15.7284	-15.6845	-15.8492	-16.0651	-15.8488	-16.0366	-16.2934	-16.4327	-15.6478	-15.9568	-16.2433
b0834	yliF	chr	+	874557,	875886,	-14.8242	-14.7946	-14.8876	-15.5838	-15.5938	-15.2639	-15.8903	-15.6815	-15.9331	-14.832	-15.5366	-15.8399
b0840	deoR	chr	-	881198,	881957,	-14.5328	-14.4605	-14.4937	-14.7104	-14.7786	-14.9507	-14.6804	-15.2531	-14.7361	-14.4972	-14.7794	-14.8488
b0841	ybjG	chr	-	882014,	882611,	-12.7862	-12.7711	-12.767	-12.7938	-12.7509	-12.7926	-13.202	-13.2465	-13.2032	-12.7757	-12.7713	-13.2154
b0851	nfsA	chr	+	890406,	891129,	-12.0619	-12.027	-11.9807	-12.0171	-12.0679	-11.9909	-12.291	-12.3721	-12.3913	-12.0267	-12.0391	-12.3499
b0852	rimK	chr	+	891189,	892092,	-15.0633	-14.9901	-15.0378	-15.4452	-15.5704	-15.5009	-15.7735	-15.9769	-15.8313	-15.0313	-15.5171	-15.8517
b0886	cydC	chr	-	926696,	928418,	-13.4712	-13.4078	-13.3553	-13.5419	-13.5704	-13.746	-13.8101	-13.807	-13.9553	-13.4161	-13.5854	-13.8591
b0889	lrp	chr	+	931817,	932312,	-13.864	-13.8747	-13.8402	-13.5807	-13.5549	-13.5139	-13.4516	-13.2698	-13.322	-13.8607	-13.5573	-13.3499
b0890	ftsK	chr	+	932446,	936436,	-11.9631	-11.9931	-11.963	-12.3727	-12.4469	-12.3775	-12.4972	-12.5215	-12.3644	-11.973	-12.4113	-12.4555
b0891	lolA	chr	+	936594,	937206,	-12.7237	-12.6436	-12.7299	-13.0927	-13.1612	-12.9999	-13.1859	-13.2731	-13.2628	-12.6983	-13.1132	-13.2384
b0893	serS	chr	+	938650,	939943,	-10.0064	-10.0417	-10.0359	-9.86847	-9.89931	-9.87209	-9.68748	-9.67122	-9.68592	-10.0265	-9.88489	-9.68211
b0902	pflA	chr	-	949562,	950303,	-11.4837	-11.4622	-11.447	-11.8465	-11.7741	-11.6862	-12.4215	-12.3793	-12.4358	-11.466	-11.7843	-12.4139
b0903	pflB	chr	-	950494,	952777,	-6.68414	-6.68639	-6.70437	-7.22082	-7.20088	-7.18036	-7.61019	-7.60876	-7.62481	-6.69066	-7.20443	-7.61495
b0904	focA	chr	-	952831,	953689,	-11.5766	-11.5689	-11.5707	-11.8666	-11.8468	-11.8204	-12.3068	-12.3122	-12.3365	-11.5724	-11.8495	-12.3189
b0921	smtA	chr	+	972759,	973545,	-14.6061	-14.5809	-14.5724	-14.8492	-14.7388	-15.0988	-15.0366	-15.0326	-14.8898	-14.588	-14.8241	-14.9815
b0926	ycbK	chr	+	982297,	982846,	-13.2443	-13.2969	-13.2627	-13.1188	-13.1081	-12.9507	-13.0805	-12.8818	-13.0812	-13.2669	-13.0871	-13.0192
b0928	aspC	chr	-	983741,	984932,	-10.2955	-10.3622	-10.31	-10.1516	-10.1269	-10.1952	-9.94177	-9.98825	-9.99092	-10.3216	-10.1451	-9.97278
b0932	pepN	chr	+	989844,	992457,	-10.5203	-10.5581	-10.5319	-10.3272	-10.306	-10.3909	-10.0642	-10.0624	-10.0733	-10.5361	-10.3254	-10.0669
b0945	pyrD	chr	+	1003990,	1005001,	-12.3435	-12.3878	-12.3295	-12.4438	-12.3919	-12.3083	-12.8412	-13.0045	-13.003	-12.354	-12.3961	-12.9448
b0947	ycbX	chr	-	1005713,	1006823,	-13.3522	-13.3029	-13.3641	-13.6616	-13.644	-13.8164	-13.8947	-13.8869	-14.0475	-13.339	-13.6743	-13.9448
b0950	pqiA	chr	+	1011223,	1012477,	-14.9177	-15.1718	-14.983	-15.1387	-14.9906	-14.916	-15.0657	-14.8022	-15.091	-15.0168	-15.0267	-14.9913
b0956	ycbG	chr	+	1017707,	1018160,	-15.2015	-15.1718	-15.134	-15.1387	-15.0816	-15.5269	-15.0756	-15.2012	-15.5765	-15.172	-15.1593	-15.2747
b0957	ompA	chr	-	1018235,	1019276,	-5.84612	-5.81483	-5.84093	-5.55712	-5.58969	-5.53341	-5.47115	-5.48907	-5.48258	-5.83416	-5.5703	-5.48048
b0961	yccF	chr	-	1023124,	1023571,	-13.0668	-13.1338	-13.0078	-13.2378	-13.1481	-13.3196	-13.7616	-13.4822	-13.5325	-13.0714	-13.2021	-13.5926
b0966	hspQ	chr	-	1027626,	1027944,	-15.1976	-15.1499	-15.0803	-15.0274	-15.1322	-15.0988	-14.4516	-14.4667	-14.36	-15.1473	-15.0915	-14.4227
b0970	yccA	chr	-	1029981,	1030641,	-10.6429	-10.5941	-10.6322	-10.7725	-10.7264	-10.6963	-10.8054	-10.7388	-10.7874	-10.6235	-10.7371	-10.7791
b0981	etk	chr	-	1041252,	1043433,	-15.6861	-15.7611	-15.744	-15.7507	-16.0651	-16.5534	-16.5105	-16.5951	-16.4578	-15.7273	-16.0103	-16.5157
b1014	putA	chr	-	1074142,	1078105,	-13.3609	-13.5378	-13.4653	-12.7337	-12.7302	-12.8778	-11.1959	-11.1908	-11.1429	-13.4477	-12.7524	-11.1753
b1015	putP	chr	+	1078527,	1080036,	-13.8077	-13.8783	-13.8301	-13.652	-13.6833	-13.8488	-13.291	-13.0847	-12.962	-13.8373	-13.696	-13.1065
b1034	ycdX	chr	+	1098101,	1098839,	-12.6903	-12.7252	-12.7825	-12.8115	-12.858	-12.7652	-12.8882	-12.9606	-12.8561	-12.7278	-12.8283	-12.8975
b1049	mdoH	chr	+	1110085,	1112629,	-11.6603	-11.6119	-11.6052	-11.9259	-11.8404	-11.8946	-12.264	-12.3721	-12.4312	-11.6282	-11.8765	-12.3536
b1061	dinI	chr	-	1120464,	1120710,	-14.7222	-14.7644	-14.6204	-15.0191	-14.9497	-14.7847	-15.1569	-15.2269	-15.2139	-14.7059	-14.9464	-15.1975
b1063	yceB	chr	-	1121935,	1122496,	-14.583	-14.6497	-14.6239	-14.9629	-14.8855	-14.6644	-15.0462	-15.0788	-15.1208	-14.6166	-14.8753	-15.082
b1068	yceM	chr	+	1126028,	1126952,	-15.4771	-15.2957	-15.5065	-15.6842	-15.7172	-16.0603	-15.7576	-15.6463	-16.0812	-15.4222	-15.7518	-15.8282
b1069	yceN	chr	+	1127061,	1128597,	-13.1628	-13.1939	-13.2424	-13.4179	-13.3867	-13.3139	-13.7978	-13.918	-13.8644	-13.1956	-13.3859	-13.8561
b1087	yceF	chr	-	1145233,	1145818,	-14.1177	-14.2278	-14.275	-14.4287	-14.0816	-14.2859	-14.5239	-14.4439	-14.5696	-14.1978	-14.2193	-14.5157
b1090	plsX	chr	+	1146843,	1147914,	-13.9752	-13.9979	-13.913	-13.8749	-13.8879	-14.2102	-14.6955	-14.4364	-14.5628	-13.9645	-13.927	-14.5681
b1092	fabD	chr	+	1148950,	1149880,	-9.39177	-9.3703	-9.37873	-9.43264	-9.45937	-9.50859	-9.50196	-9.57917	-9.54251	-9.38086	-9.45754	-9.53882
b1093	fabG	chr	+	1149892,	1150627,	-9.20782	-9.18474	-9.19317	-9.57959	-9.57912	-9.57908	-9.77604	-9.77192	-9.7966	-9.19591	-9.57927	-9.78209
b1095	fabF	chr	+	1151161,	1152403,	-9.64741	-9.64963	-9.59045	-9.63426	-9.63266	-9.66397	-9.76305	-9.74841	-9.76151	-9.63159	-9.6378	-9.75817
b1096	pabC	chr	+	1152522,	1153332,	-15.6482	-15.5635	-15.6992	-15.7237	-15.9001	-15.882	-15.7576	-15.892	-16.2032	-15.6336	-15.8361	-15.9432
b1097	yceG	chr	+	1153334,	1154357,	-15.1177	-15.3005	-15.0239	-15.2498	-15.1265	-15.0988	-15.6804	-16.1884	-15.7829	-15.1473	-15.1623	-15.8517
b1104	ycfL	chr	+	1161469,	1161847,	-15.6429	-15.6284	-15.5001	-16.1932	-16.1095	-16.6078	-16.458	-16.7734	-16.6468	-15.5959	-16.2021	-16.6125
b1107	nagZ	chr	+	1163317,	1164343,	-13.3919	-13.3469	-13.404	-13.3137	-13.3135	-13.2208	-13.131	-13.0965	-13.091	-13.3802	-13.2994	-13.1065
b1111	ycfQ	chr	-	1167422,	1168055,	-15.5205	-15.5293	-15.3083	-15.5361	-15.43	-15.4014	-15.7418	-15.7734	-15.8813	-15.4592	-15.4602	-15.7995
b1117	lolD	chr	+	1175841,	1176543,	-13.6152	-13.6713	-13.5017	-13.5478	-13.5397	-13.6148	-13.5409	-13.5497	-13.5292	-13.5998	-13.5533	-13.5393
b1118	lolE	chr	+	1176542,	1177787,	-13.8718	-13.9	-13.8606	-13.9202	-13.8687	-14.1185	-14.0756	-14.0847	-14.2086	-13.8779	-13.9206	-14.1242
b1119	nagK	chr	+	1177815,	1178727,	-14.2677	-14.1762	-14.2054	-14.4342	-14.4657	-14.3083	-14.3229	-14.6904	-14.6112	-14.2189	-14.4308	-14.5251
b1120	cobB	chr	+	1178742,	1179582,	-12.9777	-12.9313	-12.9596	-13.3288	-13.3597	-13.2422	-13.7616	-13.6077	-13.4801	-12.9569	-13.3314	-13.6113
b1123	potD	chr	-	1181005,	1182052,	-10.0249	-10.0678	-10.0462	-10.186	-10.1681	-10.1503	-10.5837	-10.5629	-10.573	-10.0452	-10.1714	-10.5738
b1129	phoQ	chr	-	1187538,	1188999,	-14.8363	-15.0864	-14.992	-14.9394	-15.0927	-15.0795	-15.458	-15.1758	-15.5225	-14.9601	-15.0378	-15.3901
b1130	phoP	chr	-	1188998,	1189670,	-13.1401	-13.1167	-13.139	-12.9433	-12.9674	-13.0137	-12.6397	-12.6748	-12.6112	-13.132	-12.966	-12.6397
b1132	hflD	chr	-	1191212,	1191854,	-13.4327	-13.4432	-13.3366	-13.5747	-13.4091	-13.4256	-13.593	-13.6205	-13.6908	-13.4079	-13.4649	-13.6352
b1136	icd	chr	+	1194345,	1195596,	-9.662	-9.68804	-9.69907	-9.0805	-9.05815	-9.08187	-8.50518	-8.46327	-8.49253	-9.6812	-9.06909	-8.48822
b1138	ymfE	chr	-	1196755,	1197460,	-14.7166	-14.6838	-14.7402	-15.2118	-15.0542	-14.8653	-15.0955	-15.4066	-15.2139	-14.7123	-15.0743	-15.224
b1139	lit	chr	+	1197917,	1198811,	-14.8516	-14.9519	-14.9652	-15.2306	-15.2957	-15.2208	-15.458	-15.3209	-15.4963	-14.9166	-15.2625	-15.4293
b1162	ycgE	chr	-	1212550,	1213282,	-15.4914	-15.4849	-15.5457	-15.6206	-15.7172	-15.5804	-15.9078	-15.5456	-15.7208	-15.5046	-15.6635	-15.7272
b1174	minE	chr	-	1223501,	1223768,	-14.0456	-14.1939	-13.983	-13.6237	-13.5781	-13.7084	-13.3827	-13.3775	-13.5628	-14.0744	-13.612	-13.4426
b1175	minD	chr	-	1223771,	1224584,	-11.0132	-11.0827	-11.0556	-11.0253	-10.9987	-11.0403	-10.825	-10.847	-10.8509	-11.0482	-11.0137	-10.8407
b1176	minC	chr	-	1224607,	1225303,	-13.9225	-13.9766	-14.0033	-14.1794	-14.2026	-14.0891	-14.3645	-14.3993	-14.2354	-13.9633	-14.1775	-14.3271
b1185	dsbB	chr	-	1231722,	1232253,	-12.9009	-12.8765	-12.9024	-13.0439	-13.026	-13.1234	-13.317	-13.2866	-13.3278	-12.8931	-13.0461	-13.3118
b1186	nhaB	chr	-	1232398,	1233940,	-12.4986	-12.5216	-12.5416	-12.7456	-12.7553	-12.6501	-13.083	-12.9742	-13.0812	-12.5185	-12.7359	-13.0494
b1189	dadA	chr	+	1236793,	1238092,	-13.8363	-13.7929	-13.8021	-13.5929	-13.6624	-13.6218	-11.9951	-12.0017	-12.003	-13.812	-13.6328	-11.9999
b1190	dadX	chr	+	1238101,	1239172,	-15.5011	-15.4578	-15.2424	-15.37	-15.264	-15.2859	-13.6288	-13.6594	-13.74	-15.4084	-15.3019	-13.6765
b1206	ychM	chr	-	1258346,	1260026,	-13.1762	-13.1252	-13.1743	-13.5717	-13.3765	-13.6717	-13.9662	-13.8716	-13.7948	-13.1585	-13.4808	-13.8756
b1221	narL	chr	-	1274401,	1275052,	-12.2337	-12.2614	-12.2073	-12.3596	-12.3639	-12.3984	-12.4168	-12.3436	-12.3659	-12.2352	-12.3675	-12.3768
b1236	galU	chr	+	1290679,	1291588,	-10.1403	-10.1173	-10.1664	-10.1685	-10.1714	-10.1234	-10.3766	-10.4103	-10.3932	-10.14	-10.1632	-10.3924
b1242	ychE	chr	+	1297820,	1298468,	-15.8424	-15.9073	-15.822	-15.6584	-15.8807	-16.0603	-16.0175	-16.5619	-16.141	-15.8577	-15.8265	-16.205
b1245	oppC	chr	+	1301857,	1302766,	-12.1811	-12.1472	-12.1167	-12.1101	-12.0017	-12.2776	-12.166	-12.0455	-12.1195	-12.1511	-12.0757	-12.1131
b1246	oppD	chr	+	1302777,	1303791,	-11.5205	-11.5502	-11.5029	-11.5258	-11.4838	-11.5804	-11.6179	-11.629	-11.5868	-11.5252	-11.5118	-11.61
b1247	oppF	chr	+	1303787,	1304792,	-11.8174	-11.8591	-11.7796	-11.6481	-11.7065	-11.7196	-11.409	-11.414	-11.36	-11.8201	-11.6886	-11.3928
b1249	cls	chr	-	1305208,	1306669,	-14.1647	-14.1178	-14.149	-14.4287	-14.385	-14.2859	-14.6581	-14.8022	-14.8069	-14.1445	-14.3842	-14.7518
b1254	yciB	chr	-	1310374,	1310914,	-13.5791	-13.5223	-13.4937	-13.7304	-13.8126	-13.6359	-14.1207	-14.073	-14.1614	-13.5353	-13.7575	-14.1207
b1255	yciC	chr	-	1310943,	1311687,	-12.9363	-12.8393	-12.8291	-13.1188	-13.1641	-13.0795	-13.4043	-13.5784	-13.4769	-12.8725	-13.1361	-13.4798
b1269	rluB	chr	+	1324875,	1325751,	-11.3891	-11.3553	-11.342	-11.6268	-11.6848	-11.6306	-11.9616	-11.9579	-12.0053	-11.3642	-11.6571	-11.9759
b1272	sohB	chr	+	1327355,	1328405,	-13.184	-13.2164	-13.2198	-13.3339	-13.307	-13.2804	-13.7576	-13.7545	-13.7057	-13.2049	-13.3119	-13.7381
b1273	yciN	chr	-	1328440,	1328692,	-13.4224	-13.3949	-13.4297	-13.3964	-13.2438	-13.1945	-12.9502	-12.9526	-12.8374	-13.4153	-13.2853	-12.9098
b1274	topA	chr	+	1329071,	1331669,	-11.8543	-11.7857	-11.819	-12.0777	-12.0536	-12.0392	-12.5324	-12.4629	-12.4817	-11.8211	-12.0594	-12.4936
b1275	cysB	chr	+	1331878,	1332853,	-12.5677	-12.565	-12.5649	-12.8026	-12.7065	-12.5702	-13.3645	-13.3847	-13.4737	-12.566	-12.7164	-13.4085
b1276	acnA	chr	+	1333854,	1336530,	-13.6218	-13.5265	-13.481	-13.5627	-13.5227	-13.4256	-12.957	-12.9824	-12.8644	-13.5485	-13.521	-12.9307
b1280	yciM	chr	+	1338581,	1339751,	-14.9635	-14.9979	-14.9696	-15.1123	-15.1152	-15.0229	-15.6072	-15.2934	-15.302	-14.9766	-15.1001	-15.3987
b1282	yciH	chr	+	1340681,	1341008,	-14.7973	-14.7091	-14.8101	-15.184	-15.2894	-14.9863	-15.6215	-15.8716	-15.676	-14.7709	-15.2053	-15.711
b1292	sapC	chr	-	1351651,	1352542,	-14.9937	-15.1327	-15.139	-14.9163	-15.1208	-15.1585	-14.9345	-14.9879	-14.7909	-15.0799	-15.0545	-14.8967
b1293	sapB	chr	-	1352528,	1353494,	-14.8302	-14.9557	-14.8422	-14.8861	-15.0221	-14.8164	-14.8731	-15.2934	-15.0239	-14.8743	-14.9438	-15.041
b1304	pspA	chr	+	1366102,	1366771,	-13.2084	-13.1252	-13.2264	-12.7304	-12.6833	-12.8325	-12.6655	-12.5255	-12.6307	-13.1852	-12.7203	-12.6106
b1322	ycjF	chr	+	1383534,	1384596,	-16.2094	-16.0536	-16.0565	-15.9087	-15.9497	-15.6936	-15.3465	-15.4066	-15.3249	-16.1118	-15.8952	-15.3562
b1324	tpx	chr	-	1386328,	1386835,	-9.40687	-9.38888	-9.40073	-9.39976	-9.38587	-9.35154	-9.29888	-9.25584	-9.28736	-9.39911	-9.38533	-9.28198
b1325	ycjG	chr	+	1386953,	1387919,	-15.3587	-15.5069	-15.4435	-15.5128	-15.4371	-15.4503	-15.7897	-15.629	-15.4203	-15.431	-15.4639	-15.6025
b1330	ynaI	chr	-	1392914,	1393946,	-13.8182	-13.7811	-13.8321	-14.2887	-14.416	-14.2102	-14.806	-14.8818	-14.6982	-13.8097	-14.3407	-14.7881
b1331	insH	chr	+	1394099,	1395116,	-11.6152	-11.6375	-11.6428	-12.0202	-12.0872	-12.0045	-12.0163	-12.2698	-12.1133	-11.6305	-12.052	-12.122
b1342	ydaN	chr	+	1406073,	1407057,	-15.3157	-15.315	-15.139	-14.7371	-14.9396	-15.0045	-14.9435	-14.7359	-14.8813	-15.2626	-14.8777	-14.8576
b1356	racR	chr	-	1417788,	1418265,	-15.5702	-15.4472	-15.4497	-15.924	-15.9197	-15.4754	-16.1361	-15.999	-15.6468	-15.4936	-15.8458	-15.9059
b4492	ydbA	chr	+	1463415,	1472037,	-14.8062	-14.8783	-14.8876	-14.6907	-14.9958	-15.1585	-15.232	-14.966	-15.2139	-14.853	-14.9078	-15.1422
b1413	hrpA	chr	+	1481084,	1484987,	-12.7449	-12.6956	-12.7536	-12.8936	-12.9259	-12.8407	-13.3797	-13.198	-13.0691	-12.7308	-12.9021	-13.2097
b1424	mdoD	chr	+	1494879,	1496535,	-13.682	-13.6574	-13.6882	-13.8061	-13.8735	-13.9332	-14.0756	-14.0157	-14.1058	-13.6755	-13.8592	-14.0682
b1431	ydcL	chr	+	1500480,	1501149,	-14.2575	-14.2602	-14.2054	-14.3036	-14.358	-14.2749	-14.4452	-14.3847	-14.4452	-14.2432	-14.3271	-14.4271
b1451	yncD	chr	-	1518986,	1521089,	-15.6323	-15.3745	-15.6344	-15.2887	-15.3613	-15.5534	-15.1779	-15.2531	-15.3482	-15.5419	-15.3632	-15.2589
b1452	yncE	chr	+	1521330,	1522392,	-13.6231	-13.5708	-13.61	-13.6842	-13.7151	-13.8989	-14.1516	-13.9552	-13.92	-13.6018	-13.7303	-14.0077
b1453	ansP	chr	-	1522504,	1524004,	-15.1859	-15.2393	-15.149	-15.955	-15.5171	-15.5534	-15.98	-15.8514	-15.8644	-15.1926	-15.655	-15.8998
b1473	yddG	chr	-	1544311,	1545193,	-15.3114	-15.2347	-15.2424	-15.4233	-15.423	-15.5269	-15.5511	-15.4978	-15.6468	-15.2657	-15.4381	-15.5681
b1479	maeA	chr	-	1551995,	1553693,	-10.5921	-10.6615	-10.5802	-10.4135	-10.4002	-10.4059	-10.2067	-10.2229	-10.1766	-10.6113	-10.4055	-10.2007
b1525	yneI	chr	-	1611338,	1612727,	-13.6113	-13.5223	-13.4858	-13.6268	-13.5588	-13.8904	-13.8101	-13.5416	-13.7909	-13.5448	-13.6265	-13.719
b1539	ydfG	chr	+	1625540,	1626287,	-11.487	-11.5342	-11.5586	-11.502	-11.4879	-11.5501	-11.1207	-11.2012	-11.1634	-11.5229	-11.5017	-11.1592
b1604	ydgH	chr	+	1676450,	1677395,	-10.7831	-10.7832	-10.795	-11.0671	-11.0858	-10.9943	-11.1919	-11.2172	-11.194	-10.7865	-11.0656	-11.2001
b1611	fumC	chr	-	1683208,	1684612,	-15.1476	-15.0864	-15.195	-14.3858	-14.5022	-14.4881	-13.0682	-13.1916	-13.1537	-15.1402	-14.4602	-13.1341
b1613	manA	chr	+	1686599,	1687775,	-11.8099	-11.7925	-11.7713	-11.7982	-11.7329	-11.7847	-11.6851	-11.8352	-11.7593	-11.793	-11.7621	-11.7545
b1623	add	chr	+	1700256,	1701258,	-11.5101	-11.5314	-11.4802	-10.6386	-10.752	-10.7337	-10.6452	-10.6301	-10.6112	-11.5085	-10.7104	-10.6286
b1629	rsxC	chr	+	1704942,	1707165,	-13.3392	-13.3531	-13.4343	-13.3339	-13.4353	-13.3658	-14.2654	-14.2076	-14.1666	-13.3705	-13.3904	-14.2126
b1630	rsxD	chr	+	1707165,	1708224,	-13.9486	-13.8981	-13.8545	-13.8419	-14.03	-14.0509	-14.5511	-14.4515	-14.3423	-13.9043	-13.9674	-14.4448
b1631	rsxG	chr	+	1708227,	1708848,	-14.5984	-14.5209	-14.549	-14.8712	-14.8759	-14.9507	-15.1361	-15.3775	-15.4203	-14.5581	-14.8852	-15.3027
b1632	rsxE	chr	+	1708851,	1709547,	-13.878	-13.8428	-13.7497	-13.9049	-13.9674	-14.0603	-14.2375	-14.4591	-14.3838	-13.8286	-13.9595	-14.352
b1634	tppB	chr	+	1710792,	1712295,	-11.5135	-11.5073	-11.5276	-11.8547	-11.8445	-11.9117	-12.1608	-12.3471	-12.1258	-11.5154	-11.8577	-12.2003
b1638	pdxH	chr	-	1715374,	1716031,	-13.7884	-13.7203	-13.6503	-13.3545	-13.2315	-13.2584	-13.2767	-13.3278	-13.1359	-13.7251	-13.2755	-13.2394
b1642	slyA	chr	-	1718413,	1718848,	-14.3009	-14.4418	-14.3338	-14.37	-14.43	-14.2971	-14.6072	-14.3278	-14.6396	-14.3559	-14.3895	-14.5298
b1651	gloA	chr	+	1725860,	1726268,	-11.6556	-11.6628	-11.6561	-12.2271	-12.25	-12.1764	-12.354	-12.3226	-12.3163	-11.6581	-12.2312	-12.3312
b1655	ydhO	chr	+	1732458,	1733274,	-14.6698	-14.6284	-14.6664	-15.0777	-15.1208	-15.2422	-15.471	-15.4364	-15.4833	-14.6549	-15.1235	-15.465
b1656	sodB	chr	+	1733401,	1733983,	-8.38918	-8.42393	-8.4417	-8.77337	-8.75887	-8.69518	-8.83428	-8.84018	-8.88211	-8.41562	-8.75403	-8.85286
b4602	ynhF	chr	-	1735479,	1735569,	-14.2967	-14.1586	-14.2722	-14.9394	-15.0542	-15.2859	-15.0462	-15.1144	-15.1208	-14.2425	-15.0461	-15.0924
b1660	ydhC	chr	+	1737934,	1739146,	-14.4819	-14.4822	-14.3714	-14.924	-14.9296	-15.1185	-15.395	-15.4822	-15.6042	-14.4495	-14.9542	-15.4924
b1663	mdtK	chr	+	1741480,	1742854,	-12.4861	-12.4385	-12.4297	-13.0089	-12.979	-12.9999	-13.4262	-13.5017	-13.4265	-12.4539	-12.992	-13.4482
b1664	ydhQ	chr	-	1742894,	1744151,	-12.9193	-12.8909	-12.7962	-12.749	-12.7432	-12.8695	-12.4564	-12.5456	-12.5012	-12.8737	-12.7632	-12.4982
b1677	lpp	chr	+	1755444,	1755681,	-5.93225	-5.9338	-5.92596	-5.29208	-5.31044	-5.2468	-5.02208	-5.03449	-5.00622	-5.93096	-5.2947	-5.02006
b1688	ydiK	chr	+	1767097,	1768210,	-13.2015	-13.1674	-13.168	-13.6489	-13.6833	-13.7614	-14.1464	-14.0613	-14.0959	-13.1804	-13.6829	-14.103
b1711	btuC	chr	-	1792195,	1793176,	-15.6376	-15.8082	-15.6486	-15.6972	-15.9197	-16.0603	-15.9616	-15.8315	-16.1009	-15.6954	-15.8605	-15.9687
b1712	ihfA	chr	-	1793276,	1793576,	-11.0794	-10.9999	-11.0204	-11.254	-11.307	-10.7965	-11.4685	-11.487	-11.6307	-11.0356	-11.202	-11.5298
b1713	pheT	chr	-	1793580,	1795968,	-8.8586	-8.85611	-8.79401	-8.51459	-8.50411	-8.59941	-8.5397	-8.5251	-8.52687	-8.83898	-8.52139	-8.53081
b1716	rplT	chr	-	1797416,	1797773,	-7.57504	-7.51246	-7.53369	-7.84359	-7.84099	-7.78692	-7.82445	-7.83429	-7.85966	-7.54213	-7.8337	-7.83979
b1729	ydjN	chr	+	1808957,	1810349,	-11.1815	-11.1922	-11.2301	-13.3753	-13.3613	-13.2261	-15.0559	-15.0555	-15.0715	-11.1989	-13.345	-15.0613
b1738	chbB	chr	-	1819322,	1819643,	-15.4962	-15.3199	-15.413	-16.8639	-16.5549	-15.9507	-16.5649	-16.8119	-16.2032	-15.4118	-16.5366	-16.4878
b1757	ynjE	chr	+	1837490,	1838798,	-13.9769	-13.9805	-13.9965	-14.8492	-14.8711	-14.6789	-15.7108	-15.7359	-15.7515	-13.9837	-14.8337	-15.7326
b1761	gdhA	chr	+	1840394,	1841738,	-15.103	-15.2255	-15.1591	-15.5717	-15.2894	-15.5009	-15.636	-15.4822	-15.5492	-15.1589	-15.4091	-15.5584
b1763	topB	chr	-	1843022,	1844984,	-13.7083	-13.7529	-13.6955	-13.7956	-13.7044	-13.9332	-13.9754	-14.1025	-14.3482	-13.7192	-13.7667	-14.1368
b1766	sppA	chr	+	1846860,	1848717,	-13.5881	-13.5209	-13.4969	-13.6552	-13.5919	-13.7009	-13.9255	-13.8818	-13.9688	-13.5391	-13.6286	-13.9276
b1770	ydjF	chr	-	1852119,	1852878,	-14.6323	-14.662	-14.7709	-15.3187	-15.416	-15.0415	-15.4325	-15.7734	-15.2246	-14.6807	-15.322	-15.4426
b1778	msrB	chr	-	1860039,	1860453,	-12.9954	-13.0116	-13.0719	-12.9375	-13.0692	-13.0322	-12.5511	-12.6077	-12.6396	-13.0224	-13.0185	-12.5988
b1786	yeaJ	chr	+	1870064,	1871555,	-14.435	-14.426	-14.3111	-15.0028	-14.7697	-14.594	-15.1569	-15.3775	-15.3959	-14.3955	-14.8146	-15.3027
b1787	yeaK	chr	+	1871597,	1872101,	-14.0264	-14.1674	-14.1872	-14.3187	-14.2957	-14.1086	-14.6433	-14.5295	-14.4898	-14.1175	-14.2739	-14.5536
b1798	leuE	chr	-	1878144,	1878783,	-14.6834	-14.7845	-14.6274	-14.7575	-14.9751	-14.6359	-15.4325	-15.7176	-15.4963	-14.6996	-14.8458	-15.5345
b1808	yoaA	chr	-	1889348,	1891259,	-15.6323	-15.7545	-15.559	-15.8061	-15.8711	-15.916	-15.6655	-16.4066	-15.9869	-15.6498	-15.8556	-15.9687
b1809	yoaB	chr	+	1891390,	1891735,	-12.1462	-12.1072	-12.1917	-11.9423	-12.0102	-12.0091	-11.8276	-11.7722	-11.773	-12.1459	-11.987	-11.7916
b1816	yoaE	chr	-	1898052,	1899609,	-14.5229	-14.4795	-14.5826	-14.7237	-14.6217	-14.5804	-14.8903	-14.8514	-14.8231	-14.525	-14.6486	-14.8547
b1823	cspC	chr	-	1905249,	1905459,	-8.91564	-8.9351	-8.96676	-8.54166	-8.5347	-8.43849	-8.35605	-8.32654	-8.33569	-8.93661	-8.5223	-8.34005
b1842	holE	chr	+	1923131,	1923362,	-15.2212	-15.3395	-15.2054	-14.6777	-14.7215	-14.8653	-14.734	-14.5537	-14.5292	-15.2548	-14.727	-14.605
b1848	yebG	chr	-	1928480,	1928771,	-13.9209	-13.8411	-13.9942	-14.245	-14.3347	-14.179	-14.317	-14.2012	-14.2409	-13.9141	-14.2804	-14.255
b1850	eda	chr	-	1930138,	1930780,	-10.513	-10.5558	-10.5258	-10.7536	-10.7683	-10.729	-10.9012	-10.9359	-10.865	-10.5308	-10.7575	-10.8983
b1851	edd	chr	-	1930816,	1932628,	-14.6644	-14.7912	-14.5227	-14.8712	-14.8195	-15.5804	-15.0657	-15.214	-15.6042	-14.6621	-14.9283	-15.2826
b1852	zwf	chr	-	1932862,	1934338,	-11.2375	-11.2407	-11.2221	-11.0528	-11.0563	-11.0345	-11.0663	-11.0087	-11.0457	-11.2341	-11.0519	-11.0418
b1857	znuA	chr	-	1939674,	1940607,	-12.7782	-12.7904	-12.8271	-12.8529	-12.9013	-12.9909	-13.1516	-13.2043	-13.0619	-12.7961	-12.8977	-13.1341
b1861	ruvA	chr	-	1943388,	1944000,	-13.6165	-13.6315	-13.6628	-13.6809	-13.6318	-13.746	-13.6692	-13.7877	-13.702	-13.6346	-13.6646	-13.715
b1863	ruvC	chr	-	1944878,	1945400,	-14.627	-14.7284	-14.744	-14.6907	-14.7086	-15.4256	-15.471	-15.5456	-15.5765	-14.6933	-14.7887	-15.5298
b1865	nudB	chr	-	1946203,	1946656,	-14.6972	-14.6315	-14.5928	-15.0863	-15.0488	-14.9684	-16.0175	-15.7545	-15.7988	-14.6448	-15.0489	-15.8576
b1866	aspS	chr	-	1946773,	1948546,	-9.36909	-9.40091	-9.34559	-9.34126	-9.32489	-9.45185	-9.65852	-9.62767	-9.67668	-9.37278	-9.34857	-9.65574
b1869	yecN	chr	+	1950289,	1950685,	-14.9569	-14.9979	-15.001	-15.6331	-15.8427	-15.5269	-16.0366	-16.0671	-15.9157	-14.983	-15.7203	-16.0011
b1874	cutC	chr	-	1956543,	1957290,	-14.2718	-14.4392	-14.3626	-14.3137	-14.3413	-14.5804	-14.4074	-14.5619	-14.4327	-14.3518	-14.3649	-14.4605
b1907	tyrP	chr	+	1987704,	1988916,	-13.3664	-13.3457	-13.4528	-13.63	-13.343	-13.3599	-13.7978	-13.8022	-13.8069	-13.3836	-13.4353	-13.8023
b1908	yecA	chr	-	1988977,	1989643,	-14.4748	-14.5693	-14.5358	-14.3545	-14.264	-14.4628	-13.593	-13.7782	-13.7208	-14.5231	-14.322	-13.691
b1915	yecF	chr	+	1993841,	1994066,	-13.8985	-14.0375	-13.9965	-14.4673	-14.4985	-14.179	-14.4325	-14.4289	-14.6112	-13.9715	-14.4362	-14.4924
b1916	sdiA	chr	-	1994133,	1994856,	-14.8733	-14.7912	-14.8463	-14.6331	-14.5978	-14.5269	-14.5719	-14.4591	-14.6541	-14.8378	-14.5986	-14.5657
b1920	fliY	chr	-	1997608,	1998409,	-13.3741	-13.3745	-13.3252	-13.7038	-13.7564	-13.7084	-13.7616	-13.7877	-13.7133	-13.3601	-13.7315	-13.7518
b1928	yedD	chr	-	2005700,	2006114,	-13.427	-13.3432	-13.3612	-12.9847	-13.0155	-13.3483	-12.8882	-13.0073	-12.907	-13.3798	-13.0496	-12.9291
b1929	yedE	chr	+	2006300,	2007506,	-11.772	-11.7942	-11.819	-12.7371	-12.6624	-12.4534	-13.8433	-13.9233	-13.8109	-11.7927	-12.6534	-13.8547
b1958	yedI	chr	-	2026472,	2027390,	-14.7535	-14.922	-14.8463	-14.4287	-14.6875	-15.0988	-14.6	-14.8818	-14.7057	-14.8344	-14.6465	-14.7164
b1976	mtfA	chr	+	2041674,	2042472,	-13.2372	-13.2074	-13.1603	-14.184	-14.0679	-13.8904	-14.458	-14.4214	-14.3778	-13.2049	-14.0771	-14.4183
b1983	yeeN	chr	+	2054881,	2055598,	-11.2397	-11.1845	-11.2337	-11.6245	-11.6313	-11.4318	-11.7806	-11.7267	-11.7525	-11.2194	-11.5976	-11.7545
b2000	flu	chr	+	2069562,	2072682,	-11.634	-11.8086	-11.4316	-7.91956	-7.94415	-8.07991	-7.55867	-7.56062	-7.54026	-11.6265	-7.95514	-7.55267
b2016	yeeZ	chr	-	2086327,	2087152,	-13.5894	-13.5853	-13.5573	-13.5657	-13.5473	-13.7084	-13.8142	-13.8266	-13.7515	-13.5788	-13.5763	-13.7952
b2029	gnd	chr	-	2097885,	2099292,	-7.87246	-7.9012	-7.86726	-7.91258	-7.90057	-7.92201	-7.92331	-7.90987	-7.94149	-7.88046	-7.90774	-7.92575
b2033	wbbJ	chr	-	2102517,	2103108,	-11.8242	-11.8323	-11.8377	-12.213	-12.3127	-12.1585	-12.4661	-12.5155	-12.5209	-11.8307	-12.2552	-12.4999
b2034	wbbI	chr	-	2103088,	2104081,	-10.4535	-10.4766	-10.4428	-10.553	-10.5595	-10.4921	-11.1595	-11.1932	-11.1492	-10.458	-10.5471	-11.1657
b2035	rfc	chr	-	2104083,	2105250,	-13.1067	-13.1795	-13.134	-13.4534	-13.4478	-13.1334	-14.0756	-14.0671	-13.9915	-13.1384	-13.3983	-14.0427
b2037	rfbX	chr	-	2106360,	2107608,	-12.2222	-12.2198	-12.2034	-12.37	-12.4004	-11.9841	-13.0706	-13.1541	-13.1486	-12.216	-12.3208	-13.1224
b2039	rfbA	chr	-	2108161,	2109043,	-10.1181	-10.1506	-10.0755	-10.4828	-10.4464	-10.4356	-10.7591	-10.7586	-10.7448	-10.1164	-10.4568	-10.7538
b2063	yegH	chr	+	2135925,	2137509,	-14.7307	-14.6651	-14.6344	-14.8204	-14.7345	-15.0603	-15.008	-15.0213	-14.8644	-14.6807	-14.8075	-14.9591
b2064	asmA	chr	-	2137782,	2139636,	-14.0866	-14.1521	-14.1415	-14.4342	-14.5781	-14.5269	-14.6804	-14.5456	-14.8231	-14.1238	-14.521	-14.687
b2091	gatD	chr	-	2169856,	2170897,	-9.04536	-9.0781	-9.04017	-8.04329	-8.07611	-8.08624	-7.89368	-7.88186	-7.89169	-9.05467	-8.06655	-7.88948
b2094	gatA	chr	-	2172618,	2173071,	-10.3231	-10.3253	-10.3257	-10.1648	-10.1901	-9.97177	-9.51279	-9.51701	-9.54482	-10.3246	-10.1472	-9.52535
b2126	yehU	chr	-	2210980,	2212666,	-13.9437	-13.9747	-14.0147	-15.011	-15.0381	-15.0045	-15.027	-15.1265	-14.9509	-13.9741	-15.024	-15.0276
b2148	mglC	chr	-	2234764,	2235775,	-13.6711	-13.6713	-13.6432	-13.7237	-13.6117	-13.5009	-10.5038	-10.5355	-10.5221	-13.6632	-13.6307	-10.5196
b2156	lysP	chr	-	2245084,	2246554,	-12.0487	-12.091	-12.0291	-12.0565	-12.0387	-12.2129	-12.5965	-12.5681	-12.6042	-12.0569	-12.0693	-12.5908
b2157	yeiE	chr	-	2246758,	2247640,	-14.6617	-14.8393	-14.7214	-14.7237	-14.7215	-14.6501	-14.6729	-14.4978	-14.6254	-14.7359	-14.7114	-14.6025
b2159	nfo	chr	+	2248861,	2249719,	-13.6048	-13.6467	-13.6239	-13.5807	-13.4765	-13.5401	-13.4105	-13.3244	-13.4173	-13.6241	-13.52	-13.3869
b2167	fruA	chr	-	2257740,	2259432,	-14.8302	-14.7187	-14.6169	-14.5898	-14.5938	-14.9332	-13.8991	-13.7925	-13.8313	-14.7294	-14.6381	-13.8429
b2175	spr	chr	+	2268000,	2268567,	-9.25771	-9.16579	-9.25176	-10.3333	-10.2848	-10.2395	-10.3585	-10.3824	-10.3365	-9.22481	-10.2939	-10.3576
b2177	yejA	chr	+	2270385,	2272200,	-15.7535	-15.4904	-15.5523	-15.6206	-15.8904	-15.9863	-16.3112	-16.1884	-15.9331	-15.6037	-15.8075	-16.1314
b2182	bcr	chr	-	2276591,	2277782,	-14.8152	-14.7284	-14.871	-14.9472	-14.9001	-15.0045	-15.243	-15.4214	-15.6468	-14.8012	-14.9308	-15.4293
b2186	yejK	chr	-	2280961,	2281969,	-11.9739	-12.0009	-12.0612	-12.2106	-12.2261	-12.2288	-12.4857	-12.5056	-12.4111	-12.0075	-12.2213	-12.4645
b2188	yejM	chr	+	2282397,	2284158,	-13.8547	-13.8202	-13.9302	-13.8639	-13.9099	-14.1585	-14.7262	-14.7639	-14.7438	-13.8642	-13.9283	-14.7435
b2199	ccmC	chr	-	2293604,	2294342,	-14.9049	-14.8747	-14.9088	-15.0356	-14.9296	-15.0988	-15.232	-14.9233	-15.2032	-14.8959	-14.9887	-15.1242
b2209	eco	chr	+	2301926,	2302415,	-11.4449	-11.4599	-11.4881	-11.1629	-11.1383	-11.1751	-11.1137	-11.125	-11.0978	-11.4621	-11.1519	-11.1113
b2210	mqo	chr	-	2303129,	2304776,	-16.2173	-16.1115	-16.0947	-15.9087	-15.9906	-15.9507	-14.4012	-14.3278	-14.3959	-16.1459	-15.9568	-14.3773
b2216	rcsD	chr	+	2311509,	2314182,	-13.3317	-13.2826	-13.3655	-13.5567	-13.7719	-13.5601	-14.1621	-14.1448	-14.1614	-13.3247	-13.6646	-14.1567
b2218	rcsC	chr	-	2315048,	2317898,	-15.2212	-15.2164	-15.2915	-15.2789	-15.2703	-15.4256	-15.9078	-15.9552	-15.7988	-15.2394	-15.2953	-15.8816
b2231	gyrA	chr	-	2334814,	2337442,	-9.22771	-9.2349	-9.2166	-9.4867	-9.48748	-9.58419	-9.67573	-9.65392	-9.64617	-9.2269	-9.50117	-9.65873
b2234	nrdA	chr	+	2342886,	2345172,	-9.94298	-9.97196	-9.9458	-10.3425	-10.3198	-10.2977	-10.6152	-10.5737	-10.592	-9.95337	-10.324	-10.5946
b2249	yfaY	chr	-	2360452,	2361655,	-14.1307	-14.1199	-14.1069	-14.0565	-14.0515	-14.0415	-13.7031	-13.8564	-13.9733	-14.1203	-14.0517	-13.8399
b2250	yfaZ	chr	-	2361754,	2362297,	-13.5779	-13.5635	-13.5996	-13.6584	-13.7001	-13.6009	-13.9122	-14.0906	-13.8813	-13.5793	-13.671	-13.9511
b2261	menC	chr	-	2373021,	2373984,	-14.0866	-14.1009	-14.0996	-13.5959	-13.648	-13.7308	-13.5684	-13.6247	-13.7171	-14.0951	-13.6423	-13.6365
b2264	menD	chr	-	2375610,	2377281,	-14.2433	-14.1586	-14.1365	-14.6268	-14.5171	-14.4503	-14.98	-14.9445	-14.9598	-14.1838	-14.5425	-14.9623
b2265	menF	chr	-	2377369,	2378665,	-14.3072	-14.4286	-14.4747	-14.6777	-14.6707	-14.6218	-15.243	-15.0101	-15.141	-14.3938	-14.6657	-15.135
b2276	nuoN	chr	-	2388069,	2389527,	-9.72418	-9.69553	-9.66273	-9.76626	-9.79141	-9.8581	-9.82348	-9.80095	-9.81345	-9.69683	-9.79261	-9.81324
b2278	nuoL	chr	-	2391226,	2393068,	-10.0853	-10.1173	-10.0834	-10.0133	-9.97286	-10.2162	-9.43131	-9.37928	-9.40139	-10.0953	-10.0202	-9.40517
b2279	nuoK	chr	-	2393064,	2393367,	-12.6509	-12.6566	-12.6983	-12.2558	-12.287	-12.3805	-11.6424	-11.642	-11.573	-12.6662	-12.2899	-11.6172
b2280	nuoJ	chr	-	2393363,	2393918,	-11.3833	-11.3488	-11.3663	-11.1276	-11.1881	-11.3425	-10.199	-10.1774	-10.1391	-11.3668	-11.1892	-10.1711
b2281	nuoI	chr	-	2393929,	2394472,	-11.9343	-11.969	-11.8756	-11.233	-11.2897	-11.3111	-10.672	-10.6787	-10.6682	-11.9286	-11.2737	-10.6726
b2282	nuoH	chr	-	2394486,	2395464,	-10.8354	-10.8308	-10.7823	-10.6148	-10.6109	-10.7346	-9.73181	-9.77608	-9.71115	-10.8185	-10.6299	-9.73728
b2283	nuoG	chr	-	2395460,	2398187,	-9.49579	-9.50521	-9.49272	-9.25487	-9.23455	-9.33422	-8.67597	-8.63547	-8.67381	-9.49803	-9.25574	-8.66314
b2284	nuoF	chr	-	2398239,	2399577,	-10.6973	-10.801	-10.7545	-10.5486	-10.5399	-10.5509	-9.77278	-9.75162	-9.76787	-10.7475	-10.5444	-9.76477
b2285	nuoE	chr	-	2399573,	2400074,	-11.5101	-11.4778	-11.4929	-11.4555	-11.3987	-11.4534	-10.7492	-10.677	-10.6866	-11.4944	-11.4255	-10.7053
b2286	nuoC	chr	-	2400076,	2401867,	-10.2567	-10.2939	-10.2336	-10.2224	-10.2151	-10.2483	-9.43012	-9.40272	-9.40044	-10.2622	-10.2224	-9.41142
b2294	yfbU	chr	-	2410121,	2410616,	-12.5187	-12.535	-12.5203	-12.2071	-12.2215	-12.3687	-12.0258	-12.0045	-11.9801	-12.5245	-12.2376	-12.0031
b2297	pta	chr	+	2412768,	2414913,	-9.41665	-9.40164	-9.41303	-9.70791	-9.73381	-9.77154	-10.1647	-10.1126	-10.2112	-9.4106	-9.73061	-10.1653
b2298	yfcC	chr	+	2415102,	2416623,	-15.1214	-15.2074	-14.992	-16.121	-16.5397	-16.3083	-17.0955	-16.892	-16.9331	-15.1104	-16.3528	-16.9751
b2300	yfcE	chr	-	2417255,	2417810,	-12.2458	-12.3463	-12.3153	-12.6712	-12.7097	-12.5567	-12.9548	-13.0326	-13.0263	-12.2985	-12.6732	-13.0027
b2303	folX	chr	+	2419346,	2419709,	-13.1869	-13.2532	-13.2451	-12.9988	-13.0955	-12.8204	-12.856	-12.8217	-12.8644	-13.2253	-13.0192	-12.8488
b2309	hisJ	chr	-	2424027,	2424810,	-12.9677	-13.0009	-12.9685	-13.2354	-13.2026	-13.1284	-13.395	-13.2832	-13.2935	-12.9789	-13.2021	-13.3251
b2314	dedD	chr	-	2429043,	2429706,	-14.1307	-14.1009	-14.0078	-14.1477	-14.0141	-14.1687	-14.2938	-14.2731	-14.2354	-14.0847	-14.08	-14.2667
b2315	folC	chr	-	2429695,	2430964,	-12.2074	-12.0968	-12.1105	-12.1454	-12.2407	-12.2998	-12.2696	-12.2515	-12.2823	-12.142	-12.2166	-12.2687
b2317	dedA	chr	-	2432103,	2432763,	-13.5242	-13.5167	-13.4575	-13.6082	-13.6875	-13.6572	-13.9435	-13.8615	-14.1208	-13.5023	-13.6561	-13.9783
b2319	usg	chr	-	2433657,	2434671,	-11.8474	-11.8267	-11.7913	-11.8097	-11.7848	-11.9095	-12.0282	-11.9246	-12.0487	-11.8243	-11.811	-12.004
b2320	pdxB	chr	-	2434736,	2435873,	-12.2519	-12.2808	-12.26	-12.2153	-12.1981	-12.4722	-12.3645	-12.3383	-12.2851	-12.2638	-12.2415	-12.3281
b2323	fabB	chr	-	2438406,	2439627,	-8.08445	-8.07977	-8.05835	-7.95796	-7.97984	-8.07286	-7.92109	-7.91444	-7.91872	-8.07538	-7.98586	-7.91828
b2325	yfcL	chr	-	2441912,	2442191,	-14.3435	-14.2672	-14.1692	-14.2838	-14.3086	-14.253	-14.3645	-14.4667	-14.4081	-14.2665	-14.2919	-14.4096
b2327	yfcA	chr	-	2442772,	2443582,	-15.2656	-15.103	-15.3083	-15.3493	-15.2894	-15.5009	-15.7735	-15.8315	-15.7057	-15.2211	-15.339	-15.7656
b2329	aroC	chr	-	2444409,	2445495,	-13.7364	-13.8622	-13.8061	-13.8275	-13.7388	-13.8407	-13.8817	-13.7687	-13.8519	-13.7972	-13.7828	-13.837
b2331	yfcN	chr	+	2446627,	2447179,	-14.5602	-14.8963	-14.586	-14.5838	-14.6097	-14.6359	-14.1886	-14.414	-14.3192	-14.6714	-14.6048	-14.2986
b2340	sixA	chr	-	2454348,	2454834,	-14.0975	-14.0435	-14.1167	-14.1566	-14.3184	-14.1384	-14.688	-14.4978	-14.6686	-14.0847	-14.2352	-14.6226
b2343	yfcZ	chr	-	2458671,	2458956,	-11.8314	-11.8103	-11.8251	-12.066	-12.1223	-11.9463	-12.0793	-12.1402	-12.1058	-11.8225	-12.0761	-12.1065
b2344	fadL	chr	+	2459327,	2460668,	-10.0633	-10.0272	-10.0432	-10.5331	-10.5295	-10.4699	-10.8693	-10.9526	-10.9744	-10.0454	-10.5217	-10.9305
b2351	yfdH	chr	+	2466235,	2467156,	-11.8796	-11.9128	-11.9329	-12.141	-12.0913	-11.9931	-12.5894	-12.5315	-12.6559	-11.9057	-12.0925	-12.5951
b2352	yfdI	chr	+	2467152,	2468484,	-11.4876	-11.4976	-11.4528	-12.013	-11.9861	-11.7009	-12.4293	-12.4725	-12.5765	-11.4808	-11.9487	-12.493
b2366	dsdA	chr	+	2477223,	2478552,	-11.9069	-11.9169	-11.9454	-11.7154	-11.8006	-11.7847	-10.4885	-10.4663	-10.4503	-11.9212	-11.7692	-10.4683
b2370	evgS	chr	+	2482395,	2485989,	-15.1214	-15.0255	-15.001	-15.2402	-15.2453	-14.9684	-16.1993	-15.8716	-15.8313	-15.0541	-15.199	-15.9623
b2393	nupC	chr	+	2511063,	2512266,	-9.33805	-9.33609	-9.37221	-10.1114	-10.0974	-10.0269	-10.2278	-10.2565	-10.2802	-9.3471	-10.0914	-10.2547
b2394	insL	chr	+	2512352,	2513465,	-14.8485	-14.7155	-14.7593	-14.9317	-15.1095	-14.9332	-15.3465	-15.6815	-15.4327	-14.7776	-15.0212	-15.4696
b2395	yfeA	chr	-	2513664,	2515854,	-14.2842	-14.3469	-14.4747	-14.9317	-15.1095	-14.882	-15.4325	-15.0906	-15.4203	-14.3576	-15.013	-15.3189
b2411	ligA	chr	-	2526182,	2528198,	-12.2443	-12.2399	-12.3013	-12.1828	-12.1322	-12.2315	-12.0306	-12.0412	-12.0643	-12.2589	-12.1634	-12.0456
b2414	cysK	chr	+	2530430,	2531402,	-10.3954	-10.3691	-10.3599	-11.8079	-11.8103	-11.7084	-12.2224	-12.1996	-12.302	-10.3764	-11.7939	-12.2433
b2415	ptsH	chr	+	2531785,	2532043,	-10.3797	-10.3506	-10.4775	-10.6128	-10.6927	-10.4754	-10.5311	-10.6776	-10.6705	-10.3971	-10.6318	-10.6223
b2416	ptsI	chr	+	2532087,	2533815,	-9.72489	-9.74212	-9.72249	-9.56756	-9.53612	-9.57611	-9.48957	-9.4548	-9.46435	-9.72991	-9.55246	-9.47027
b2417	crr	chr	+	2533855,	2534365,	-9.42571	-9.39641	-9.42373	-9.64371	-9.66296	-9.59103	-9.81649	-9.89463	-9.92876	-9.41533	-9.64564	-9.87866
b2432	yfeY	chr	-	2548662,	2549238,	-14.4259	-14.3669	-14.41	-14.4956	-14.4336	-14.4754	-14.6507	-14.4439	-14.556	-14.4015	-14.4602	-14.5536
b2435	amiA	chr	+	2550373,	2551243,	-13.7478	-13.7075	-13.7651	-14.2165	-14.1208	-14.1086	-14.4074	-14.629	-14.4578	-13.7392	-14.1502	-14.4878
b2470	acrD	chr	+	2585616,	2588730,	-15.7825	-15.6045	-15.586	-15.955	-16.0434	-16.1384	-16.3827	-16.0906	-16.5093	-15.6642	-16.0267	-16.3312
b4606	ypfM	chr	-	2588828,	2588888,	-15.6972	-15.8428	-15.744	-15.5361	-15.752	-15.2422	-14.9078	-14.8315	-15.1927	-15.7577	-15.5925	-14.9783
b2472	dapE	chr	+	2589628,	2590756,	-13.6725	-13.8658	-13.6937	-13.5959	-13.7086	-13.7537	-13.6692	-13.4103	-13.6254	-13.7402	-13.6764	-13.573
b2478	dapA	chr	-	2596903,	2597782,	-11.222	-11.2292	-11.2391	-11.4977	-11.3451	-11.4534	-11.508	-11.4968	-11.5184	-11.2293	-11.4104	-11.5084
b2479	gcvR	chr	+	2597927,	2598500,	-14.7943	-14.722	-14.8751	-15.0439	-15.1095	-14.8989	-15.3112	-15.24	-15.2907	-14.7921	-15.0545	-15.2826
b2480	bcp	chr	+	2598499,	2598970,	-11.4316	-11.4013	-11.5207	-11.7054	-11.7129	-11.613	-11.7399	-11.7865	-11.7554	-11.4462	-11.6952	-11.759
b2495	yfgD	chr	+	2615599,	2615959,	-13.141	-13.2474	-13.1616	-13.046	-13.0207	-13.0091	-13.0706	-13.0073	-12.9778	-13.1815	-13.0274	-13.0184
b2496	hda	chr	-	2616096,	2616843,	-15.8062	-15.7414	-15.6557	-15.2498	-15.283	-15.3541	-15.3229	-15.0671	-15.3482	-15.7402	-15.2821	-15.2511
b2497	uraA	chr	-	2616892,	2618182,	-11.947	-11.9916	-11.9178	-12.1714	-12.2315	-12.2694	-12.7262	-12.8365	-12.7574	-11.9532	-12.2166	-12.7691
b2498	upp	chr	-	2618267,	2618894,	-9.3446	-9.3281	-9.34352	-9.71039	-9.74854	-9.76283	-10.0942	-10.0829	-10.1252	-9.33878	-9.73778	-10.1018
b2501	ppk	chr	+	2621065,	2623132,	-13.7335	-13.8151	-13.7289	-13.9867	-13.9725	-13.8005	-14.1886	-14.0101	-14.3134	-13.7588	-13.9503	-14.1751
b2512	yfgL	chr	-	2635495,	2636674,	-10.3223	-10.3386	-10.3391	-10.619	-10.6565	-10.7084	-10.8044	-10.8514	-10.7869	-10.3325	-10.6514	-10.8118
b2516	yfgA	chr	-	2639852,	2640866,	-12.3157	-12.3005	-12.3532	-12.3687	-12.403	-12.357	-12.4791	-12.4667	-12.5143	-12.3212	-12.3846	-12.4878
b2518	ndk	chr	-	2642454,	2642886,	-11.6913	-11.7345	-11.7219	-11.5302	-11.4811	-11.4817	-10.9754	-10.9701	-11.0013	-11.7143	-11.4974	-10.983
b2520	yfhM	chr	-	2645347,	2650309,	-13.0803	-13.0678	-13.0506	-13.7816	-13.6521	-13.4014	-13.5789	-14.0157	-13.7095	-13.0676	-13.6529	-13.7435
b2524	iscX	chr	-	2654557,	2654758,	-14.1085	-13.9843	-13.9718	-14.0481	-14.1039	-14.0137	-14.458	-14.414	-14.6183	-14.0267	-14.0714	-14.4994
b2525	fdx	chr	-	2654769,	2655105,	-12.3365	-12.3346	-12.2716	-12.6036	-12.5781	-12.6789	-12.7998	-12.8767	-12.7909	-12.317	-12.6012	-12.8188
b2526	hscA	chr	-	2655106,	2656957,	-11.2949	-11.2826	-11.2583	-11.2618	-11.2586	-11.5122	-11.6224	-11.5951	-11.6732	-11.2802	-11.2946	-11.6321
b2528	iscA	chr	-	2657584,	2657908,	-12.6146	-12.6807	-12.6309	-12.6809	-12.6563	-12.8204	-13.2824	-13.2465	-13.3748	-12.641	-12.6878	-13.3037
b2529	iscU	chr	-	2657924,	2658311,	-11.7128	-11.6956	-11.756	-11.8983	-11.8771	-11.7252	-11.9605	-11.9325	-12.0204	-11.7192	-11.8605	-11.9731
b2530	iscS	chr	-	2658338,	2659553,	-9.67215	-9.65404	-9.63893	-9.78182	-9.78746	-9.83356	-10.265	-10.2208	-10.2784	-9.65655	-9.79232	-10.2566
b2551	glyA	chr	-	2682275,	2683529,	-8.70864	-8.73114	-8.71108	-8.76831	-8.77477	-8.77106	-8.83532	-8.86462	-8.83383	-8.71679	-8.77205	-8.84337
b2553	glnB	chr	-	2685091,	2685430,	-12.2059	-12.1025	-12.0899	-12.1886	-12.2664	-12.0988	-12.7836	-12.7452	-12.9005	-12.1373	-12.2142	-12.8123
b2554	yfhA	chr	-	2685490,	2686825,	-15.0562	-15.1284	-15.0565	-14.9011	-14.9148	-15.0988	-14.2881	-14.2866	-14.3249	-15.0799	-14.936	-14.3006
b2566	era	chr	-	2700502,	2701408,	-12.3157	-12.3126	-12.3965	-12.3339	-12.3282	-12.4074	-12.9502	-12.8665	-12.9376	-12.3373	-12.3416	-12.9206
b2576	srmB	chr	+	2710917,	2712252,	-12.2035	-12.2261	-12.2231	-12.2814	-12.2208	-12.3367	-12.647	-12.5909	-12.7189	-12.2166	-12.2576	-12.6551
b2579	yfiD	chr	-	2714087,	2714471,	-9.87595	-9.90989	-9.96268	-10.2369	-10.2486	-10.1377	-11.1348	-11.1318	-11.1133	-9.91166	-10.2277	-11.1262
b2581	yfiF	chr	-	2715512,	2716550,	-12.046	-12.0009	-12.0291	-12.0253	-12.0927	-12.116	-12.1926	-12.2849	-12.3748	-12.026	-12.0732	-12.2826
b2582	trxC	chr	+	2716756,	2717176,	-14.7914	-14.6933	-14.7631	-15.37	-15.2957	-15.7847	-15.593	-15.6815	-15.4081	-14.75	-15.3842	-15.5488
b2587	kgtP	chr	-	2722469,	2723768,	-11.7914	-11.7711	-11.7997	-11.6656	-11.6991	-11.7047	-11.6739	-11.6365	-11.6192	-11.787	-11.6886	-11.6432
b2592	clpB	chr	-	2729621,	2732195,	-11.3897	-11.4535	-11.3813	-11.1133	-11.1604	-11.1662	-11.1497	-11.0781	-11.1416	-11.4082	-11.1454	-11.1253
b2593	yfiH	chr	-	2732324,	2733056,	-14.8485	-14.7091	-14.9302	-14.7643	-14.9497	-14.8989	-15.232	-15.1634	-15.2032	-14.8228	-14.8777	-15.2012
b2600	tyrA	chr	-	2736969,	2738091,	-13.9602	-13.8358	-13.7943	-13.9948	-13.9025	-14.0891	-14.0805	-14.3071	-13.9598	-13.8695	-13.9595	-14.0977
b2607	trmD	chr	-	2742593,	2743361,	-11.4932	-11.4945	-11.4798	-11.9307	-11.9284	-11.9863	-12.4742	-12.4744	-12.4421	-11.4898	-11.9376	-12.4628
b2609	rpsP	chr	-	2743958,	2744207,	-8.51713	-8.52654	-8.5539	-8.692	-8.68235	-8.6844	-9.10173	-9.11219	-9.15852	-8.53071	-8.68587	-9.12479
b4461	yfjD	chr	+	2746795,	2748082,	-14.9242	-14.9901	-14.9785	-14.8061	-15.1208	-15.0229	-15.6507	-15.2799	-15.5765	-14.9614	-14.994	-15.5063
b2614	grpE	chr	-	2748136,	2748730,	-10.9049	-10.887	-10.8913	-10.3282	-10.3323	-10.4067	-10.3409	-10.3357	-10.3109	-10.895	-10.3417	-10.3287
b2617	smpA	chr	+	2751626,	2751968,	-11.9282	-11.8332	-11.8351	-12.1771	-12.1452	-12.179	-12.281	-12.4667	-12.3006	-11.8692	-12.1608	-12.3405
b2669	stpA	chr	-	2796112,	2796517,	-11.312	-11.3811	-11.4458	-11.5441	-11.5545	-11.3716	-12.2795	-12.2631	-12.2032	-11.3723	-11.5224	-12.2472
b2670	ygaW	chr	+	2797185,	2797635,	-13.7069	-13.722	-13.6845	-14.1521	-14.138	-14.2422	-14.5719	-14.7267	-14.4327	-13.7054	-14.1578	-14.5633
b2678	proW	chr	+	2804031,	2805096,	-12.383	-12.3732	-12.3765	-11.9472	-11.9906	-12.0675	-11.9685	-11.9167	-11.9835	-12.3779	-11.987	-11.9583
b2686	emrB	chr	+	2810637,	2812176,	-15.2453	-15.185	-15.139	-14.8204	-14.9497	-15.2639	-15.0175	-14.7925	-15.0812	-15.1941	-14.9464	-14.9687
b2687	luxS	chr	-	2812239,	2812755,	-10.9534	-10.9675	-10.9727	-10.8106	-10.8637	-10.7623	-10.5417	-10.5768	-10.57	-10.9636	-10.8304	-10.5621
b2688	gshA	chr	-	2812904,	2814461,	-12.0121	-12.0526	-12.021	-12.3467	-12.2814	-12.3027	-12.6378	-12.6141	-12.5747	-12.028	-12.3061	-12.6081
b2690	yqaB	chr	-	2814958,	2815525,	-14.5377	-14.4366	-14.5195	-14.5777	-14.4765	-14.6218	-14.6581	-14.6463	-14.7057	-14.4981	-14.5307	-14.6713
b2697	alaS	chr	-	2817402,	2820033,	-9.45272	-9.46507	-9.4392	-9.40661	-9.40757	-9.50657	-9.35981	-9.33724	-9.32654	-9.45292	-9.42152	-9.34125
b2702	srlA	chr	+	2823853,	2824417,	-12.279	-12.3333	-12.2675	-12.1955	-12.1959	-12.058	-10.5938	-10.6682	-10.6401	-12.2935	-12.1744	-10.6319
b2703	srlE	chr	+	2824413,	2825373,	-12.7951	-12.73	-12.7689	-12.1287	-12.1781	-12.0114	-10.363	-10.3892	-10.3655	-12.7657	-12.1357	-10.3716
b2704	srlB	chr	+	2825383,	2825755,	-11.5318	-11.471	-11.5375	-11.4018	-11.4756	-11.5719	-10.3747	-10.3815	-10.3293	-11.5129	-11.4642	-10.3604
b2705	srlD	chr	+	2825758,	2826538,	-9.86941	-9.85236	-9.84311	-9.53203	-9.57013	-9.57526	-8.82438	-8.81814	-8.80412	-9.85616	-9.55804	-8.81531
b2708	gutQ	chr	+	2827834,	2828800,	-13.569	-13.603	-13.5391	-13.5657	-13.4424	-13.6148	-12.736	-12.8365	-12.7266	-13.5715	-13.5075	-12.7615
b2712	hypF	chr	-	2833194,	2835447,	-15.5352	-15.6104	-15.5523	-16.4342	-16.3282	-16.5009	-16.5375	-16.629	-16.4833	-15.5648	-16.3877	-16.544
b2714	ascG	chr	-	2836275,	2837289,	-15.1401	-15.1586	-15.0331	-15.4233	-15.416	-14.7537	-15.6072	-15.6638	-15.5492	-15.1146	-15.2986	-15.6025
b2733	mutS	chr	+	2855114,	2857676,	-12.5721	-12.53	-12.5894	-12.619	-12.6007	-12.7233	-12.9685	-13.0355	-12.9376	-12.5629	-12.6245	-12.9767
b2741	rpoS	chr	-	2864580,	2865573,	-10.8928	-10.9213	-10.9061	-10.6899	-10.7202	-10.6973	-10.3896	-10.421	-10.4073	-10.906	-10.7066	-10.4051
b2742	nlpD	chr	-	2865635,	2866775,	-11.8941	-11.9091	-11.884	-12.2534	-12.2477	-12.3111	-12.489	-12.414	-12.5325	-11.8962	-12.2588	-12.4815
b2743	pcm	chr	-	2866914,	2867541,	-14.3435	-14.3494	-14.2888	-14.3339	-14.283	-14.4135	-14.5443	-14.4214	-14.5696	-14.3295	-14.3187	-14.5157
b2745	truD	chr	-	2868276,	2869326,	-12.5539	-12.5321	-12.4405	-12.8061	-12.8735	-12.773	-13.2486	-13.2433	-13.302	-12.5134	-12.8355	-13.2658
b2746	ispF	chr	-	2869322,	2869802,	-12.59	-12.4945	-12.4961	-12.9182	-12.8322	-12.8124	-13.0222	-13.0613	-13.0357	-12.5306	-12.8574	-13.0385
b2747	ispD	chr	-	2869801,	2870512,	-14.8702	-14.8116	-14.7029	-14.6144	-14.8664	-14.9863	-15.221	-15.1265	-15.3134	-14.8012	-14.7933	-15.224
b2779	eno	chr	-	2904664,	2905963,	-6.66878	-6.69184	-6.69216	-6.89658	-6.8766	-6.82894	-7.17341	-7.16544	-7.18573	-6.6831	-6.87604	-7.17542
b2783	chpR	chr	-	2909112,	2909361,	-15.337	-15.4208	-15.4435	-15.3288	-15.348	-15.5534	-15.4452	-15.4667	-15.4833	-15.3946	-15.3701	-15.465
b2784	relA	chr	-	2909438,	2911673,	-13.4665	-13.4156	-13.4559	-13.7678	-13.7432	-13.5668	-13.688	-13.8022	-13.8856	-13.4464	-13.7236	-13.7895
b2786	barA	chr	+	2913078,	2915835,	-14.3457	-14.3174	-14.208	-14.5478	-14.5435	-14.6789	-15.1993	-15.1387	-15.1822	-14.2957	-14.5643	-15.1751
b2798	xni	chr	+	2928986,	2929832,	-15.5501	-15.1762	-15.1846	-15.5361	-15.6257	-15.5534	-15.8224	-15.4822	-15.5628	-15.3101	-15.5844	-15.6226
b2810	csdA	chr	+	2941358,	2942564,	-15.1289	-15.2347	-15.0755	-15.0692	-15.1907	-15.179	-15.2654	-15.0555	-15.1108	-15.1473	-15.1472	-15.1458
b2817	amiC	chr	-	2945778,	2947032,	-14.4031	-14.3199	-14.2532	-14.5186	-14.5171	-14.4135	-14.688	-14.9445	-14.7133	-14.3312	-14.5017	-14.7684
b2819	recD	chr	-	2948656,	2950483,	-15.0668	-14.9824	-14.9875	-15.2594	-15.5022	-15.4256	-15.3229	-15.4364	-15.4578	-15.0155	-15.4055	-15.4031
b2822	recC	chr	-	2957081,	2960450,	-14.8796	-14.9824	-15.001	-15.4673	-15.1907	-15.2859	-15.2996	-15.6815	-15.5492	-14.9475	-15.2919	-15.4924
b2829	ptsP	chr	-	2964209,	2966456,	-13.1898	-13.1263	-13.1155	-13.4342	-13.385	-13.3541	-13.8308	-13.8119	-13.7869	-13.147	-13.3966	-13.8095
b2830	nudH	chr	-	2966468,	2966999,	-14.3072	-14.3247	-14.264	-14.4842	-14.3249	-14.179	-14.6955	-14.4667	-14.6541	-14.3005	-14.3528	-14.61
b2832	ygdQ	chr	+	2968441,	2969155,	-15.5753	-15.6776	-15.4497	-15.5128	-15.5246	-15.8488	-15.856	-16.0213	-16.3838	-15.5706	-15.5643	-16.0751
b2837	galR	chr	+	2974620,	2975652,	-15.1976	-15.221	-15.2478	-14.8565	-14.8855	-14.8653	-14.8142	-14.7734	-14.9778	-15.2196	-14.8728	-14.8576
b2845	yqeG	chr	+	2983868,	2985098,	-12.6283	-12.7059	-12.6664	-12.7422	-12.7023	-12.5702	-13.1233	-13.0073	-13.1308	-12.6647	-12.6949	-13.0907
b2865	ygeR	chr	-	2997157,	2997913,	-14.6752	-14.7912	-14.5657	-15.1657	-15.0651	-15.0795	-15.243	-15.0906	-15.2683	-14.6797	-15.1001	-15.205
b2894	xerD	chr	-	3036868,	3037765,	-15.3327	-15.1586	-15.3832	-15.3493	-15.4442	-15.4754	-15.5649	-15.6463	-15.6183	-15.2861	-15.4163	-15.6075
b2895	fldB	chr	+	3037876,	3038398,	-12.9904	-13.0185	-13.1008	-13.0315	-13.0885	-13.0462	-13.131	-13.1417	-13.0691	-13.0307	-13.0629	-13.1118
b2897	ygfY	chr	-	3038825,	3039092,	-13.735	-13.7268	-13.7252	-13.8602	-13.8012	-13.8245	-13.9846	-13.8564	-13.942	-13.7294	-13.8241	-13.9307
b2898	ygfZ	chr	+	3039334,	3040315,	-11.631	-11.6131	-11.6239	-11.5619	-11.5312	-11.6644	-11.578	-11.5155	-11.5433	-11.623	-11.5605	-11.547
b2900	yqfB	chr	-	3041333,	3041645,	-14.35	-14.3077	-14.4715	-14.8275	-14.586	-14.3658	-14.734	-14.5619	-14.676	-14.3693	-14.6255	-14.6609
b2903	gcvP	chr	-	3044189,	3047063,	-10.1686	-10.1956	-10.1303	-9.91967	-9.9346	-10.016	-9.35549	-9.31096	-9.34434	-10.1663	-9.94135	-9.33827
b2905	gcvT	chr	-	3047594,	3048689,	-10.5565	-10.5549	-10.5453	-10.3339	-10.358	-10.4021	-10.0926	-10.1058	-10.1308	-10.5528	-10.3563	-10.11
b2913	serA	chr	-	3055199,	3056432,	-14.3719	-14.3321	-14.3714	-14.1932	-14.2299	-14.0229	-13.8991	-13.8365	-14.0007	-14.3584	-14.1851	-13.9152
b2914	rpiA	chr	-	3056687,	3057347,	-10.2356	-10.2029	-10.1856	-10.4744	-10.442	-10.4786	-10.5092	-10.5451	-10.4527	-10.2102	-10.4581	-10.4992
b2922	yggE	chr	-	3065361,	3066102,	-12.4902	-12.4084	-12.442	-12.3212	-12.2695	-12.3396	-11.7517	-11.7829	-11.8079	-12.4488	-12.2969	-11.7807
b2924	mscS	chr	-	3066968,	3067829,	-12.2252	-12.213	-12.1976	-12.2048	-12.1847	-12.2998	-12.9233	-12.8895	-12.8457	-12.2132	-12.208	-12.8854
b2935	tktA	chr	-	3077665,	3079657,	-8.483	-8.48176	-8.49018	-8.50613	-8.50191	-8.52058	-8.56918	-8.5384	-8.52128	-8.48464	-8.50608	-8.54292
b2938	speA	chr	-	3081956,	3083933,	-10.2107	-10.2277	-10.1843	-10.3458	-10.3595	-10.4029	-10.8339	-10.8773	-10.8094	-10.2087	-10.3612	-10.8377
b2939	yqgB	chr	-	3083941,	3084073,	-15.0281	-14.9633	-14.8876	-15.1748	-15.3151	-15.4014	-16.2881	-16.1634	-16.3134	-14.9652	-15.2788	-16.2589
b2943	galP	chr	+	3086305,	3087700,	-13.8032	-13.8837	-13.9302	-13.3162	-13.4039	-13.2422	-12.98	-12.9715	-12.9984	-13.8654	-13.3493	-12.984
b2952	yggT	chr	+	3093841,	3094408,	-12.6523	-12.7455	-12.653	-12.9336	-12.9346	-12.8778	-13.2486	-13.29	-13.2381	-12.6828	-12.9257	-13.2569
b2958	yggN	chr	-	3098925,	3099645,	-13.7041	-13.5492	-13.4873	-14.0777	-14.1877	-13.9332	-14.1886	-14.1326	-14.1158	-13.5875	-14.1103	-14.1458
b2959	yggL	chr	-	3099828,	3100155,	-12.0522	-12.1258	-12.1833	-12.1499	-12.0161	-12.1998	-12.4532	-12.4458	-12.4142	-12.1132	-12.0861	-12.437
b2962	yggX	chr	+	3102114,	3102390,	-13.1762	-13.1984	-13.1731	-13.0992	-13.061	-13.0891	-12.4955	-12.5195	-12.5459	-13.1827	-13.0778	-12.5203
b2976	glcB	chr	-	3119655,	3121827,	-14.0686	-14.0156	-14.1846	-13.6777	-13.6563	-13.7926	-13.3889	-13.4939	-13.4737	-14.0827	-13.6829	-13.4493
b2982	insH	chr	+	3128199,	3129216,	-11.5144	-11.5233	-11.5436	-11.8447	-11.827	-11.8305	-11.9708	-11.8882	-11.9453	-11.5257	-11.8334	-11.937
b3006	exbB	chr	-	3149271,	3150006,	-12.7229	-12.6706	-12.7271	-13.2188	-13.3086	-13.1535	-13.9616	-14.0613	-14.0053	-12.7065	-13.2544	-14.006
b3009	yghB	chr	+	3151584,	3152244,	-14.0351	-14.0156	-13.992	-14.924	-14.7001	-14.6501	-15.008	-15.1387	-15.0619	-14.0161	-14.7632	-15.0648
b3017	sufI	chr	-	3159278,	3160691,	-13.711	-13.6651	-13.7196	-13.7643	-13.5879	-13.7769	-13.8224	-14.1265	-13.9376	-13.698	-13.6721	-13.948
b3018	plsC	chr	-	3160765,	3161503,	-13.3252	-13.3126	-13.398	-13.4098	-13.4074	-13.5204	-13.6729	-13.566	-13.6147	-13.3414	-13.4244	-13.6201
b3020	ygiS	chr	-	3164132,	3165740,	-14.7421	-14.7091	-14.896	-15.8061	-15.6177	-15.4754	-15.6507	-16.3775	-16.0239	-14.7732	-15.655	-15.9687
b3024	ygiW	chr	-	3167305,	3167698,	-14.2292	-14.1828	-14.1315	-13.9049	-14.03	-13.8904	-13.8991	-13.8716	-13.8069	-14.1852	-13.966	-13.8576
b3029	ygiN	chr	+	3171163,	3171478,	-12.9137	-12.8954	-12.8814	-12.7038	-12.6117	-12.6789	-12.1634	-12.24	-12.1783	-12.8983	-12.6518	-12.1909
b3032	cpdA	chr	-	3174027,	3174855,	-13.5303	-13.5335	-13.459	-14.0356	-13.9932	-13.8989	-14.2265	-14.1025	-14.2139	-13.5106	-13.9927	-14.1844
b3033	yqiB	chr	-	3174879,	3175302,	-15.7083	-15.6589	-15.5065	-15.8204	-15.9197	-15.8488	-16.1361	-16.629	-16.36	-15.6316	-15.8753	-16.3478
b3038	ygiC	chr	+	3178442,	3179603,	-13.2524	-13.2404	-13.1872	-12.8079	-12.8807	-12.8366	-12.4404	-12.4997	-12.5192	-13.2295	-12.8495	-12.4855
b3040	zupT	chr	+	3180571,	3181345,	-14.4009	-14.4208	-14.3055	-14.9708	-15.0816	-14.6501	-15.0175	-14.892	-14.815	-14.3794	-14.9727	-14.9059
b3041	ribB	chr	-	3181834,	3182488,	-10.581	-10.547	-10.575	-10.7588	-10.787	-10.6954	-10.9322	-11.0052	-10.9778	-10.5679	-10.7636	-10.9697
b3052	rfaE	chr	-	3193341,	3194775,	-11.4996	-11.5219	-11.5207	-11.4186	-11.3816	-11.4706	-11.4677	-11.4066	-11.3519	-11.513	-11.4068	-11.4077
b3053	glnE	chr	-	3194822,	3197663,	-13.9618	-13.8927	-13.9237	-14.3036	-14.1011	-14.0891	-14.4199	-14.1326	-14.2683	-13.9276	-14.1638	-14.2766
b3054	ygiF	chr	-	3197685,	3198987,	-13.3381	-13.1652	-13.2145	-12.9491	-12.9841	-13.0603	-12.93	-12.7853	-12.9756	-13.2432	-12.9833	-12.9013
b3055	htrG	chr	+	3199228,	3199849,	-14.9049	-14.864	-15.0424	-14.2259	-14.2766	-14.3775	-14.1106	-14.2269	-14.3077	-14.9289	-14.2739	-14.2126
b3058	folB	chr	-	3202242,	3202611,	-14.8272	-14.6713	-14.6274	-14.652	-14.5899	-14.7384	-14.6433	-14.5784	-14.6908	-14.7155	-14.6318	-14.6403
b3065	rpsU	chr	+	3208802,	3209018,	-8.50729	-8.43198	-8.50287	-8.87032	-8.81161	-8.85887	-9.71127	-9.69097	-9.78688	-8.48056	-8.83797	-9.73158
b3066	dnaG	chr	+	3209128,	3210874,	-13.4281	-13.5097	-13.2999	-13.4927	-13.5569	-13.6148	-14.2767	-14.1025	-14.2573	-13.4161	-13.5434	-14.2164
b3075	ebgR	chr	+	3219487,	3220471,	-15.8182	-15.6964	-15.6415	-15.955	-16.0434	-15.8164	-15.6655	-16.3775	-16.1208	-15.7251	-15.978	-16.0077
b3094	exuR	chr	+	3244673,	3245450,	-13.8985	-13.8927	-13.8668	-13.9747	-13.9906	-13.7614	-13.9255	-14.0441	-13.8898	-13.8874	-13.949	-13.9464
b3095	yqjA	chr	+	3245794,	3246457,	-14.0579	-14.1456	-14.1616	-14.4125	-14.283	-14.0415	-14.2542	-14.3348	-14.3423	-14.116	-14.2853	-14.3087
b3096	yqjB	chr	+	3246460,	3246844,	-15.7307	-15.7678	-15.7289	-15.8492	-15.9197	-15.882	-15.856	-16.3209	-16.0428	-15.7424	-15.8902	-16.0477
b3097	yqjC	chr	+	3246990,	3247359,	-14.0091	-14.1348	-14.102	-14.4071	-14.43	-14.1384	-14.5719	-14.6904	-14.7515	-14.0765	-14.3754	-14.6687
b3100	yqjK	chr	+	3248098,	3248398,	-15.8002	-15.4	-15.913	-15.924	-15.9396	-15.8488	-16.0366	-15.892	-16.2032	-15.6828	-15.9206	-16.0477
b3114	tdcE	chr	-	3258145,	3260440,	-14.0686	-14.137	-13.9763	-13.7237	-13.7853	-13.9507	-12.166	-12.125	-12.1524	-14.0635	-13.7875	-12.149
b3131	agaR	chr	-	3275877,	3276687,	-14.9836	-15.0536	-15.001	-14.9011	-14.8195	-14.8164	-14.7735	-14.7359	-14.8313	-15.0115	-14.8458	-14.7824
b3147	yraM	chr	+	3291421,	3293458,	-11.8807	-11.9141	-11.8955	-11.9948	-12.0274	-11.9507	-12.1608	-12.0555	-12.1422	-11.896	-12.0048	-12.1224
b3149	diaA	chr	+	3293830,	3294421,	-14.0686	-14.0475	-14.0827	-14.3493	-14.3681	-14.4014	-14.8391	-14.7734	-14.6468	-14.0656	-14.3666	-14.749
b3163	nlpI	chr	-	3306061,	3306946,	-13.4167	-13.4592	-13.4343	-13.7921	-13.7194	-13.7308	-14.395	-14.2598	-14.2139	-13.4358	-13.745	-14.2886
b3167	rbfA	chr	-	3310798,	3311200,	-11.979	-12.0602	-11.9976	-11.7237	-11.7231	-11.7518	-11.4484	-11.3902	-11.4119	-12.0109	-11.7275	-11.418
b3168	infB	chr	-	3311363,	3314036,	-8.70917	-8.75385	-8.74362	-8.84456	-8.85709	-8.91703	-9.06173	-9.03034	-9.03302	-8.73376	-8.86161	-9.04219
b3169	nusA	chr	-	3314060,	3315548,	-9.42128	-9.35915	-9.3734	-9.48122	-9.45893	-9.43676	-9.64425	-9.67316	-9.66796	-9.38664	-9.46301	-9.66115
b3172	argG	chr	+	3316658,	3318002,	-13.5881	-13.4931	-13.67	-13.63	-13.6117	-13.7158	-13.8947	-13.9499	-13.92	-13.5783	-13.6328	-13.9198
b3175	secG	chr	-	3320194,	3320527,	-10.9652	-10.9397	-10.9754	-11.2094	-11.1832	-11.0497	-11.7606	-11.8933	-11.777	-10.9596	-11.1712	-11.8044
b3177	folP	chr	-	3322084,	3322933,	-14.2054	-14.2909	-14.2211	-13.9278	-13.9271	-13.8571	-13.7576	-13.8315	-13.7515	-14.2379	-13.9167	-13.7768
b3178	hflB	chr	-	3323022,	3324957,	-10.3185	-10.3674	-10.3282	-10.5668	-10.5803	-10.6936	-10.7826	-10.7823	-10.7909	-10.3374	-10.592	-10.7854
b3181	greA	chr	-	3326260,	3326737,	-10.9181	-10.9834	-10.9702	-11.2312	-11.2064	-11.2887	-11.4621	-11.4382	-11.4157	-10.9544	-11.2266	-11.4384
b3182	dacB	chr	+	3326984,	3328418,	-14.4559	-14.6345	-14.3539	-14.4179	-14.3151	-14.331	-14.4199	-14.1144	-14.3959	-14.4817	-14.351	-14.3148
b3184	yhbE	chr	-	3329791,	3330757,	-14.7279	-14.7479	-14.6521	-15.3288	-15.6338	-15.882	-15.6215	-15.6463	-15.9509	-14.7123	-15.5563	-15.7381
b3185	rpmA	chr	-	3330883,	3331141,	-8.5455	-8.47593	-8.58683	-8.98197	-8.98428	-8.81592	-9.19896	-9.29874	-9.27198	-8.53352	-8.95725	-9.25375
b3186	rplU	chr	-	3331161,	3331473,	-8.2518	-8.27749	-8.2748	-8.28305	-8.24534	-8.32814	-8.81649	-8.75733	-8.78216	-8.26689	-8.26993	-8.78663
b3189	murA	chr	-	3333256,	3334516,	-11.4481	-11.488	-11.4309	-11.5397	-11.4711	-11.6044	-11.5728	-11.6804	-11.6732	-11.4562	-11.513	-11.6394
b3192	yrbC	chr	-	3335277,	3335913,	-11.2585	-11.1578	-11.2073	-11.3609	-11.307	-11.3153	-11.4548	-11.4448	-11.5167	-11.2097	-11.3261	-11.4735
b3193	yrbD	chr	-	3335931,	3336483,	-12.0718	-12.0957	-12.0978	-12.4659	-12.4187	-12.5567	-12.6125	-12.7084	-12.775	-12.0871	-12.4542	-12.697
b3194	yrbE	chr	-	3336487,	3337270,	-13.1003	-13.0425	-13.0273	-13.1566	-13.25	-13.3367	-13.395	-13.3419	-13.322	-13.0598	-13.2304	-13.353
b3196	yrbG	chr	+	3338296,	3339274,	-15.1666	-15.3101	-15.2317	-15.7104	-15.7086	-16.1384	-16.0756	-15.999	-16.4327	-15.2318	-15.7655	-16.1677
b3197	kdsD	chr	+	3339287,	3340274,	-12.5894	-12.5941	-12.6737	-12.6793	-12.7065	-12.5401	-13.0559	-13.0157	-13.0146	-12.6146	-12.6716	-13.0292
b3198	kdsC	chr	+	3340294,	3340861,	-13.6684	-13.7381	-13.5624	-13.7851	-13.7454	-13.9246	-14.593	-14.8315	-14.8231	-13.6596	-13.784	-14.7408
b3200	lptA	chr	+	3341401,	3341959,	-12.665	-12.652	-12.6619	-12.957	-12.9371	-12.7233	-13.0731	-13.2433	-13.1208	-12.6598	-12.9097	-13.1386
b3210	arcB	chr	-	3348710,	3351047,	-12.9811	-13.0325	-13.0424	-13.4314	-13.4353	-13.3541	-13.4677	-13.3002	-13.5358	-13.0155	-13.4217	-13.4393
b3212	gltB	chr	+	3352653,	3357207,	-13.093	-13.1284	-13.0743	-13.3622	-13.5246	-13.6789	-13.6433	-13.6638	-13.7988	-13.0993	-13.4893	-13.703
b3213	gltD	chr	+	3357219,	3358638,	-14.322	-14.3569	-14.3195	-14.5013	-14.4585	-14.882	-14.5789	-14.6205	-14.6613	-14.3328	-14.5287	-14.6201
b3221	yhcH	chr	-	3367035,	3367500,	-14.2883	-14.3821	-14.2613	-13.8899	-13.6645	-13.8084	-12.0139	-12.0455	-12.003	-14.3109	-13.7575	-12.0192
b3222	nanK	chr	-	3367496,	3368372,	-14.0264	-14.0057	-13.7962	-13.6552	-13.7944	-13.8325	-11.7616	-11.8439	-11.7711	-13.95	-13.7518	-11.7888
b3223	nanE	chr	-	3368368,	3369058,	-12.8302	-12.8082	-12.7431	-12.7337	-12.8115	-12.7158	-10.9406	-11.0825	-10.9926	-12.7975	-12.7707	-10.9999
b3225	nanA	chr	-	3370704,	3371598,	-10.156	-10.1115	-10.1421	-9.79492	-9.78943	-9.83153	-8.81469	-8.77148	-8.82858	-10.1371	-9.79745	-8.80669
b3231	rplM	chr	-	3376244,	3376673,	-7.3915	-7.37738	-7.41378	-7.56209	-7.58965	-7.49761	-8.13353	-8.17721	-8.14931	-7.39312	-7.56643	-8.15192
b3232	yhcM	chr	-	3376891,	3378019,	-15.0884	-15.074	-15.1898	-15.2789	-15.138	-15.0415	-15.484	-15.2664	-15.5765	-15.1118	-15.1683	-15.4471
b3234	degQ	chr	+	3378764,	3380132,	-13.2064	-13.1488	-13.2291	-13.3238	-13.4178	-13.3541	-13.4262	-13.5017	-13.36	-13.1934	-13.3763	-13.4238
b3235	degS	chr	+	3380221,	3381289,	-14.8702	-14.8082	-14.7402	-15.0949	-15.0706	-14.7233	-14.98	-15.1387	-15.1208	-14.8114	-15.0212	-15.0751
b3238	yhcN	chr	+	3383559,	3383823,	-13.7378	-13.8534	-13.816	-14.4287	-14.3714	-14.4881	-14.7418	-14.6119	-14.7909	-13.7978	-14.4073	-14.719
b3244	tldD	chr	-	3388604,	3390050,	-12.442	-12.4	-12.4945	-12.3276	-12.3681	-12.3512	-12.264	-12.222	-12.3235	-12.4426	-12.3519	-12.2722
b4472	yhdP	chr	-	3390479,	3394280,	-14.0722	-14.1499	-14.0851	-14.5597	-14.4948	-14.4754	-15.1886	-14.892	-14.9869	-14.1013	-14.5132	-15.0242
b3247	rng	chr	-	3394347,	3395817,	-13.3544	-13.2462	-13.2546	-13.6457	-13.4603	-13.4817	-13.6179	-13.5867	-13.5594	-13.2889	-13.5229	-13.5877
b3252	csrD	chr	-	3399413,	3401354,	-15.6972	-15.4156	-15.5001	-15.9867	-15.9197	-16.179	-15.9986	-15.9339	-16.4327	-15.5419	-15.978	-16.1171
b3256	accC	chr	+	3403938,	3405288,	-9.92416	-9.89234	-9.92171	-9.94014	-9.93663	-9.97792	-10.2552	-10.2359	-10.2126	-9.9128	-9.94386	-10.2342
b3258	panF	chr	+	3405628,	3407080,	-14.489	-14.4931	-14.6169	-15.0863	-14.9396	-15.1998	-15.593	-15.4822	-15.3959	-14.5259	-15.024	-15.4878
b3259	prmA	chr	+	3407091,	3407973,	-12.6903	-12.7678	-12.6655	-12.66	-12.7129	-12.8045	-13.2101	-13.0213	-13.0123	-12.7083	-12.7081	-13.0811
b3279	yrdA	chr	+	3427257,	3427812,	-13.7335	-13.7043	-13.67	-13.8132	-13.9001	-13.8989	-13.9167	-13.8514	-13.8941	-13.7054	-13.8703	-13.8891
b3281	aroE	chr	-	3428041,	3428860,	-14.2946	-14.2029	-14.1142	-13.9948	-14.1818	-14.2315	-13.8991	-14.1265	-13.9598	-14.2106	-14.1235	-13.9848
b3283	yrdD	chr	-	3429441,	3429984,	-15.5906	-15.5463	-15.5325	-16.0028	-15.8427	-15.4754	-16.3112	-16.1634	-16.1009	-15.559	-15.8313	-16.19
b3290	trkA	chr	+	3434539,	3435916,	-13.0767	-13.1338	-13.113	-13.3314	-13.2315	-13.3083	-13.423	-13.5784	-13.3959	-13.1059	-13.2755	-13.4571
b3291	mscL	chr	+	3436045,	3436456,	-12.2806	-12.3235	-12.2743	-12.599	-12.6593	-12.577	-12.5912	-12.7267	-12.6254	-12.2929	-12.6265	-12.6423
b3294	rplQ	chr	-	3437637,	3438021,	-7.64368	-7.64538	-7.64136	-7.92165	-7.94231	-7.93419	-7.93328	-7.94035	-7.94177	-7.64358	-7.93417	-7.93838
b3297	rpsK	chr	-	3439730,	3440120,	-7.76655	-7.70301	-7.74185	-7.97004	-7.97546	-7.887	-8.24753	-8.26124	-8.27407	-7.73809	-7.96018	-8.26097
b3298	rpsM	chr	-	3440136,	3440493,	-7.52629	-7.48462	-7.53466	-7.79745	-7.80354	-7.75633	-7.96661	-7.97788	-7.97251	-7.51467	-7.7944	-7.97202
b3299	rpmJ	chr	-	3440639,	3440756,	-8.24288	-8.13127	-8.11764	-8.71329	-8.70087	-8.24606	-9.07232	-9.24737	-9.2772	-8.16874	-8.62752	-9.19385
b3302	rpmD	chr	-	3442564,	3442744,	-9.34636	-9.34033	-9.3473	-9.27706	-9.20217	-9.46553	-8.96646	-8.87922	-8.95657	-9.34462	-9.26358	-8.93671
b3304	rplR	chr	-	3443265,	3443619,	-8.80039	-8.81437	-8.77722	-8.56952	-8.55848	-8.63409	-8.33086	-8.32078	-8.30007	-8.79833	-8.57317	-8.31688
b3305	rplF	chr	-	3443628,	3444162,	-8.64612	-8.65495	-8.62237	-7.78585	-7.79307	-7.88819	-7.79174	-7.80823	-7.79272	-8.64219	-7.80436	-7.79694
b3308	rplE	chr	-	3444920,	3445460,	-6.68275	-6.63654	-6.69465	-7.06115	-7.06734	-7.01689	-7.15111	-7.18149	-7.17273	-6.67058	-7.05768	-7.16771
b3309	rplX	chr	-	3445474,	3445789,	-8.06763	-8.05757	-8.10357	-8.14458	-8.16445	-8.01323	-8.4458	-8.48983	-8.49071	-8.07446	-8.13441	-8.4746
b3310	rplN	chr	-	3445799,	3446171,	-7.59469	-7.61425	-7.5728	-7.79684	-7.75077	-7.69391	-8.00167	-8.02362	-8.04196	-7.59483	-7.75733	-8.02237
b3311	rpsQ	chr	-	3446335,	3446590,	-8.90135	-8.93009	-8.88325	-8.94683	-8.93835	-9.03886	-9.65967	-9.58566	-9.64302	-8.9056	-8.95569	-9.63159
b3316	rpsS	chr	-	3448269,	3448548,	-7.68689	-7.70167	-7.73081	-8.10605	-8.08491	-8.04208	-8.26116	-8.27797	-8.29123	-7.70428	-8.08547	-8.27676
b3319	rplD	chr	-	3449702,	3450308,	-7.30088	-7.32479	-7.30961	-7.25816	-7.2322	-7.32894	-7.18427	-7.17173	-7.17489	-7.3113	-7.25486	-7.17723
b3339	tufA	chr	-	3468166,	3469351,	-4.87502	-4.90413	-4.88754	-4.80444	-4.77891	-4.89412	-4.81357	-4.77586	-4.78385	-4.88824	-4.80402	-4.79179
b3342	rpsL	chr	-	3472199,	3472574,	-7.80078	-7.82222	-7.77807	-7.75625	-7.74276	-7.80893	-7.72999	-7.76115	-7.74562	-7.8013	-7.75692	-7.74468
b3346	yheO	chr	-	3473739,	3474462,	-13.4304	-13.4619	-13.4778	-13.9049	-13.6137	-13.5401	-13.9616	-14.0498	-14.2795	-13.4543	-13.6927	-14.0942
b3349	slyD	chr	-	3475928,	3476519,	-9.3357	-9.30591	-9.32353	-9.33232	-9.3368	-9.49811	-9.73693	-9.66901	-9.69661	-9.32225	-9.35812	-9.70229
b3352	yheS	chr	+	3479310,	3481224,	-13.402	-13.4065	-13.4343	-13.539	-13.504	-13.4565	-14.0366	-14.0441	-13.9598	-13.4127	-13.5084	-14.011
b3356	yhfA	chr	-	3483435,	3483840,	-13.8796	-13.9786	-14.0147	-13.9787	-13.8103	-14.0045	-13.7301	-13.7452	-13.6908	-13.95	-13.8927	-13.7204
b3358	yhfK	chr	+	3484812,	3486915,	-14.6035	-14.5751	-14.6628	-15.1477	-15.1495	-15.1585	-15.1569	-15.1884	-15.2463	-14.6106	-15.1502	-15.1975
b3386	rpe	chr	-	3512403,	3513081,	-11.4718	-11.4622	-11.5013	-11.7279	-11.7591	-11.6608	-12.1361	-12.1884	-12.2032	-11.477	-11.7337	-12.1751
b3388	damX	chr	-	3514041,	3515328,	-11.1956	-11.2018	-11.1985	-11.6402	-11.6353	-11.7047	-11.6683	-11.6793	-11.7691	-11.1985	-11.647	-11.7066
b3389	aroB	chr	-	3515419,	3516508,	-12.2544	-12.2849	-12.2743	-12.7354	-12.7367	-12.8695	-12.8391	-12.8741	-12.8898	-12.2702	-12.7552	-12.8673
b3396	mrcA	chr	+	3520892,	3523445,	-13.1676	-13.1295	-13.2681	-13.3596	-13.1788	-13.2639	-13.8947	-14.0101	-13.8354	-13.1827	-13.2496	-13.9059
b3404	envZ	chr	-	3532537,	3533890,	-14.5377	-14.6164	-14.5557	-14.6584	-14.6959	-14.7847	-14.9078	-15.0671	-14.7909	-14.5686	-14.696	-14.909
b3407	yhgF	chr	+	3535406,	3537728,	-11.3897	-11.3732	-11.3238	-11.3931	-11.4625	-11.3716	-11.5434	-11.5497	-11.4987	-11.3651	-11.4253	-11.5292
b3409	feoB	chr	+	3538428,	3540750,	-12.3686	-12.3525	-12.41	-12.9708	-13.0115	-13.0322	-13.5409	-13.5416	-13.6505	-12.3749	-13.0008	-13.5791
b3412	bioH	chr	-	3542095,	3542866,	-14.5602	-14.5635	-14.5657	-14.2887	-14.4126	-14.3425	-14.1156	-14.1326	-14.177	-14.5629	-14.3597	-14.1422
b3416	malQ	chr	-	3546007,	3548092,	-13.5402	-13.6698	-13.5391	-13.3086	-13.4178	-13.2261	-12.4404	-12.4439	-12.4265	-13.5817	-13.351	-12.4365
b3417	malP	chr	-	3548101,	3550495,	-11.6178	-11.6175	-11.6499	-11.4024	-11.3808	-11.3984	-11.1406	-11.125	-11.1245	-11.6269	-11.3906	-11.1303
b3423	glpR	chr	-	3557869,	3558628,	-13.8938	-13.9709	-13.8361	-13.8097	-13.7476	-13.6501	-13.6581	-13.7221	-13.6577	-13.9019	-13.7529	-13.6765
b3428	glgP	chr	-	3562156,	3564604,	-14.1686	-14.1434	-14.1241	-14.4342	-14.4336	-14.6078	-14.4325	-14.5537	-14.5225	-14.1473	-14.4584	-14.4994
b3429	glgA	chr	-	3564622,	3566056,	-14.5059	-14.4525	-14.404	-14.4018	-14.3546	-14.4256	-14.3465	-14.3278	-14.4578	-14.4583	-14.3806	-14.3794
b3431	glgX	chr	-	3567368,	3569342,	-15.3631	-15.474	-15.526	-14.8787	-14.9346	-14.9507	-14.3525	-14.5701	-14.7671	-15.445	-14.918	-14.5536
b3432	glgB	chr	-	3569338,	3571525,	-14.1177	-14.0176	-13.983	-14.5898	-14.5171	-14.4628	-14.5649	-14.5056	-14.6834	-14.0446	-14.5327	-14.5877
b3434	yhgN	chr	+	3573093,	3573687,	-13.8318	-13.8693	-14.0971	-14.2937	-14.43	-14.1687	-14.6215	-14.5456	-14.4578	-13.9159	-14.3425	-14.5393
b3462	ftsX	chr	-	3599050,	3600109,	-13.1168	-13.0425	-13.0227	-13.245	-13.2407	-13.2584	-13.3406	-13.3489	-13.4327	-13.0645	-13.2447	-13.3752
b3463	ftsE	chr	-	3600101,	3600770,	-13.5193	-13.5693	-13.407	-13.5099	-13.5607	-13.6644	-13.6397	-13.5497	-13.8272	-13.5023	-13.5583	-13.6752
b3468	yhhN	chr	+	3603773,	3604400,	-14.3093	-14.4156	-14.3481	-15.011	-15.0381	-15.331	-15.232	-15.2799	-14.9961	-14.3551	-15.0686	-15.1567
b3476	nikA	chr	+	3611689,	3613264,	-12.6711	-12.6605	-12.7431	-14.1343	-14.1437	-13.7926	-14.2938	-14.2934	-14.2463	-12.6878	-14.0828	-14.2766
b3493	pitA	chr	+	3635664,	3637164,	-11.0666	-11.0262	-11.0764	-11.6544	-11.6414	-11.7365	-11.9719	-11.9742	-11.9756	-11.0558	-11.6595	-11.9739
b3498	prlC	chr	-	3641162,	3643205,	-11.7318	-11.7649	-11.7089	-11.3061	-11.3609	-11.3041	-11.243	-11.3498	-11.2545	-11.736	-11.3339	-11.2779
b3500	gor	chr	+	3644321,	3645674,	-11.1849	-11.1856	-11.1924	-11.4342	-11.4967	-11.4897	-11.5307	-11.4958	-11.3966	-11.1873	-11.4745	-11.4715
b3515	gadW	chr	-	3661912,	3662641,	-15.7593	-15.864	-15.6628	-15.6842	-15.7876	-16.179	-16.484	-16.6994	-16.8644	-15.7643	-15.8027	-16.6739
b3516	gadX	chr	-	3663008,	3663833,	-15.5059	-15.5406	-15.6135	-15.924	-15.7876	-16.0229	-16.3827	-16.7734	-16.5628	-15.5476	-15.8654	-16.5536
b3527	yhjJ	chr	-	3678466,	3679963,	-13.4855	-13.4512	-13.3906	-13.5302	-13.4639	-13.4754	-13.5965	-13.5701	-13.6289	-13.4464	-13.4874	-13.6001
b3529	yhjK	chr	-	3681652,	3683608,	-14.9702	-14.9073	-15.1093	-15.4125	-15.0872	-15.1585	-15.3346	-15.3348	-15.4081	-14.9869	-15.199	-15.3604
b3536	bcsE	chr	+	3694480,	3696052,	-15.0074	-14.9519	-15.154	-15.0607	-15.2269	-15.4503	-15.6215	-15.4364	-15.2907	-15.0287	-15.199	-15.4426
b3538	bcsG	chr	+	3696236,	3697916,	-15.2133	-15.0455	-15.0803	-15.2887	-15.0983	-15.2639	-15.4199	-15.5295	-15.5628	-15.1175	-15.1836	-15.5017
b3539	yhjV	chr	+	3698585,	3699857,	-14.8394	-14.8082	-14.6955	-15.0863	-15.2147	-15.1998	-15.7418	-15.6463	-16.1009	-14.7865	-15.1683	-15.8282
b3544	dppA	chr	-	3704120,	3705728,	-15.2453	-15.3898	-15.3424	-15.5013	-15.7432	-15.3083	-15.7262	-15.6994	-15.7208	-15.3198	-15.5885	-15.7164
b3546	eptB	chr	-	3706806,	3708498,	-15.0351	-15.0215	-14.992	-16.3086	-16.1437	-16.2208	-16.7108	-16.7359	-16.6468	-15.0181	-16.2084	-16.695
b3551	bisC	chr	-	3712083,	3714417,	-14.5501	-14.5014	-14.61	-14.7104	-14.752	-14.7691	-14.9525	-14.999	-15.0715	-14.5504	-14.7405	-15.0077
b3552	yiaD	chr	+	3714569,	3715229,	-12.0633	-11.9695	-11.9459	-12.0618	-12.0327	-12.1086	-12.1271	-12.0891	-12.141	-11.9975	-12.0535	-12.1207
b3553	ghrB	chr	+	3715332,	3716307,	-11.7083	-11.7171	-11.7219	-11.954	-11.9585	-11.7788	-11.9367	-11.9948	-11.9609	-11.7151	-11.9289	-11.9623
b3554	yiaF	chr	-	3716356,	3717067,	-11.7424	-11.7075	-11.7531	-11.9249	-11.9384	-11.9841	-12.3258	-12.3401	-12.3808	-11.7337	-11.9405	-12.3494
b3556	cspA	chr	+	3718071,	3718284,	-11.8831	-11.91	-12.0565	-12.5853	-12.5801	-12.5139	-13.2265	-13.2498	-13.2711	-11.9399	-12.5718	-13.2491
b3560	glyQ	chr	-	3722429,	3723341,	-10.4154	-10.4029	-10.4189	-10.1161	-10.1392	-10.1484	-10.0258	-10.0537	-10.0065	-10.4123	-10.1328	-10.027
b3574	yiaJ	chr	-	3739706,	3740555,	-15.3897	-15.4686	-15.3539	-15.2402	-15.2957	-15.2422	-15.1361	-14.8716	-15.1108	-15.4049	-15.269	-15.0444
b3591	selA	chr	-	3757880,	3759272,	-14.2595	-14.1984	-14.1142	-14.2259	-14.2862	-14.6644	-14.806	-14.5951	-14.6613	-14.1964	-14.3153	-14.6897
b3600	mtlD	chr	+	3772446,	3773595,	-12.6061	-12.5335	-12.5179	-12.4424	-12.533	-12.5074	-11.9502	-11.9728	-11.9442	-12.5562	-12.4984	-11.9547
b3605	lldD	chr	+	3777849,	3779040,	-13.864	-13.8254	-13.7728	-12.4206	-12.4318	-12.5467	-9.91251	-9.92198	-9.97612	-13.8246	-12.4445	-9.93764
b3607	cysE	chr	-	3779763,	3780585,	-12.9946	-12.9882	-12.9013	-13.1589	-13.1597	-13.2208	-13.3889	-13.314	-13.357	-12.9652	-13.1683	-13.3551
b3608	gpsA	chr	-	3780664,	3781684,	-13.1486	-13.1338	-13.1756	-12.7104	-12.7809	-12.9332	-12.806	-12.6815	-12.8498	-13.1513	-12.7782	-12.7831
b3609	secB	chr	-	3781683,	3782151,	-10.1435	-10.1347	-10.155	-10.1754	-10.1557	-10.0789	-9.76928	-9.74317	-9.78117	-10.1438	-10.1505	-9.76572
b3611	yibN	chr	-	3782606,	3783038,	-11.7321	-11.741	-11.7776	-12.1101	-12.0672	-12.0603	-12.0719	-12.2092	-12.194	-11.748	-12.0803	-12.1545
b3613	envC	chr	+	3784860,	3786120,	-14.6671	-14.687	-14.5457	-14.717	-14.9099	-14.8989	-15.471	-15.1144	-15.6183	-14.6377	-14.841	-15.4031
b3616	tdh	chr	-	3788342,	3789368,	-10.9067	-10.9224	-10.8989	-10.5627	-10.5906	-10.7261	-10.2852	-10.2498	-10.277	-10.9097	-10.6004	-10.2718
b3619	rfaD	chr	+	3792009,	3792942,	-9.83366	-9.83898	-9.87471	-9.94768	-9.90542	-9.87521	-10.0086	-10.0234	-10.0166	-9.84708	-9.91483	-10.0158
b3621	rfaC	chr	+	3794001,	3794961,	-14.2759	-14.4713	-14.3714	-14.6394	-14.5665	-14.5401	-15.1674	-14.9233	-15.1009	-14.3659	-14.5864	-15.0682
b3622	rfaL	chr	+	3794970,	3796230,	-12.1652	-12.1516	-12.1359	-12.7388	-12.7312	-12.2208	-13.5824	-13.7221	-13.6325	-12.1522	-12.6454	-13.6403
b3623	waaU	chr	-	3796261,	3797335,	-13.9421	-13.9443	-14.0193	-14.4071	-14.3282	-13.8084	-14.8142	-15.151	-15.0428	-13.9645	-14.2625	-14.988
b3624	rfaZ	chr	-	3797367,	3798219,	-14.6644	-14.6467	-14.7402	-15.0777	-14.8057	-14.2315	-15.2542	-15.5951	-15.2032	-14.6797	-14.784	-15.3271
b3627	rfaI	chr	-	3800061,	3801081,	-14.0194	-14.0968	-13.9324	-14.1521	-14.1322	-13.9684	-14.6288	-14.6638	-14.6686	-14.0188	-14.1132	-14.6532
b3628	rfaB	chr	-	3801080,	3802190,	-14.3178	-14.3694	-14.5391	-14.5717	-14.5978	-14.2208	-14.9616	-15.1025	-14.942	-14.3955	-14.5268	-14.9945
b3636	rpmG	chr	-	3809272,	3809440,	-9.19076	-9.04109	-9.14413	-9.32138	-9.49482	-8.65275	-10.2728	-10.6167	-10.7569	-9.1262	-9.28025	-10.5311
b3637	rpmB	chr	-	3809460,	3809697,	-8.62933	-8.59207	-8.69982	-8.67838	-8.69201	-8.70697	-9.1411	-9.16802	-9.19415	-8.6365	-8.68964	-9.16773
b3640	dut	chr	+	3811954,	3812410,	-11.1324	-11.1107	-11.1293	-11.1443	-11.1641	-11.1446	-11.4412	-11.4075	-11.4227	-11.1242	-11.1546	-11.4246
b3641	slmA	chr	+	3812516,	3813113,	-13.1345	-13.0853	-13.0067	-13.3339	-13.2735	-13.1185	-13.5824	-13.7084	-13.6147	-13.0806	-13.269	-13.6302
b3644	yicC	chr	+	3814698,	3815562,	-12.5861	-12.5693	-12.5937	-12.6159	-12.5811	-12.4379	-12.5789	-12.4534	-12.4721	-12.5827	-12.5703	-12.5028
b3650	spoT	chr	+	3820422,	3822531,	-13.1762	-13.2509	-13.2041	-13.2378	-13.3265	-13.2749	-13.7616	-14.0847	-13.9778	-13.2087	-13.2886	-13.9276
b3651	trmH	chr	+	3822537,	3823227,	-14.0794	-14.0556	-14.1142	-14.0863	-14.1237	-14.1185	-14.5239	-14.5056	-14.4515	-14.0813	-14.1103	-14.4924
b3652	recG	chr	+	3823232,	3825314,	-14.5156	-14.4686	-14.3921	-14.8639	-14.5473	-14.7084	-15.0462	-14.9879	-15.0239	-14.4637	-14.67	-15.0209
b3653	gltS	chr	-	3825482,	3826688,	-12.4484	-12.5258	-12.4818	-13.1188	-13.0997	-13.205	-13.395	-13.392	-13.3838	-12.4833	-13.1213	-13.3901
b3654	yicE	chr	+	3826967,	3828359,	-13.9097	-13.8675	-13.7346	-13.184	-13.0885	-13.1384	-13.0127	-13.0073	-13.2032	-13.8437	-13.1272	-13.0759
b3660	yicL	chr	+	3836270,	3837194,	-14.7884	-14.9369	-14.7289	-14.924	-15.0168	-14.9332	-15.1886	-15.1144	-15.4203	-14.8182	-14.9727	-15.2433
b3666	uhpT	chr	-	3843798,	3845190,	-14.5906	-14.5492	-14.5293	-15.2594	-15.1322	-15.4014	-15.395	-15.4214	-15.3365	-14.559	-15.2115	-15.3816
b3669	uhpA	chr	-	3848158,	3848749,	-14.2821	-14.3872	-14.549	-14.5657	-14.4985	-14.7233	-14.806	-14.8022	-14.9244	-14.3895	-14.5523	-14.8458
b3673	emrD	chr	+	3851944,	3853129,	-13.4583	-13.3519	-13.4328	-13.6584	-13.8195	-13.746	-14.131	-14.1448	-14.2907	-13.4148	-13.7529	-14.19
b3688	yidQ	chr	+	3865750,	3866083,	-13.889	-13.8711	-13.941	-14.5478	-14.6379	-14.8164	-14.9435	-14.6205	-14.6541	-13.8977	-14.6318	-14.7381
b3703	rpmH	chr	+	3882358,	3882499,	-9.57985	-9.56425	-9.60686	-10.1589	-10.1161	-10.1579	-10.4689	-10.4812	-10.4642	-9.5823	-10.1364	-10.4708
b3704	rnpA	chr	+	3882515,	3882875,	-13.9853	-13.8463	-13.8341	-14.1298	-14.1294	-14.3196	-15.0657	-15.0788	-15.2463	-13.8941	-14.1562	-15.1314
b4557	yidD	chr	+	3882838,	3883096,	-15.2656	-15.4104	-15.1846	-15.6972	-15.6257	-15.4014	-16.3346	-15.7734	-16.1009	-15.2877	-15.613	-16.0682
b3706	mnmE	chr	+	3884850,	3886215,	-13.2514	-13.3089	-13.2465	-13.2259	-13.2625	-13.3894	-13.5307	-13.5867	-13.6797	-13.2688	-13.2682	-13.5988
b3724	phoU	chr	-	3904875,	3905601,	-13.0255	-12.996	-12.9056	-13.2094	-13.2208	-13.4135	-13.3766	-13.3524	-13.3718	-12.9805	-13.2439	-13.3678
b3730	glmU	chr	-	3911852,	3913223,	-11.169	-11.1567	-11.1769	-11.2265	-11.1781	-11.2804	-11.4742	-11.3902	-11.4761	-11.1672	-11.209	-11.4496
b3732	atpD	chr	-	3914015,	3915398,	-8.33123	-8.34975	-8.32233	-8.05888	-8.03038	-8.17787	-7.7406	-7.72987	-7.74357	-8.3348	-8.06094	-7.73848
b3733	atpG	chr	-	3915424,	3916288,	-10.3412	-10.325	-10.3832	-10.0828	-10.0887	-10.124	-10.0989	-10.1036	-10.0622	-10.3477	-10.0919	-10.0871
b3734	atpA	chr	-	3916338,	3917880,	-7.9293	-7.92302	-7.90037	-7.7077	-7.69135	-7.75525	-7.73974	-7.70909	-7.69533	-7.91887	-7.70614	-7.71478
b3735	atpH	chr	-	3917892,	3918426,	-10.8023	-10.817	-10.8108	-10.6939	-10.7234	-10.7028	-10.4906	-10.5002	-10.4765	-10.8096	-10.7104	-10.4884
b3738	atpB	chr	-	3919258,	3920074,	-9.39428	-9.4335	-9.36316	-9.5004	-9.46162	-9.49129	-9.66014	-9.65064	-9.68129	-9.39814	-9.47887	-9.6648
b3739	atpI	chr	-	3920082,	3920463,	-14.7738	-14.6375	-14.8101	-16.0028	-15.7876	-15.7537	-16.484	-16.3489	-16.36	-14.737	-15.8507	-16.3987
b3746	ravA	chr	-	3927619,	3929116,	-14.3741	-14.1895	-14.2451	-15.2594	-15.2087	-15.0045	-15.0366	-15.5295	-15.3959	-14.2735	-15.1928	-15.2946
b3747	kup	chr	+	3929338,	3931207,	-13.3242	-13.3581	-13.3758	-13.5807	-13.6854	-13.8005	-14.0905	-14.2531	-14.1158	-13.3501	-13.6657	-14.1458
b3748	rbsD	chr	+	3931373,	3931793,	-14.6376	-14.5153	-14.5691	-15.5597	-15.5321	-15.3083	-15.4972	-15.7734	-15.7515	-14.5764	-15.5055	-15.6635
b3749	rbsA	chr	+	3931800,	3933306,	-13.9017	-13.8945	-13.9324	-15.2789	-15.4875	-15.0988	-15.6215	-15.9552	-15.7988	-13.908	-15.3528	-15.7768
b3750	rbsC	chr	+	3933310,	3934276,	-13.9437	-13.935	-13.8689	-15.2498	-15.3216	-14.9507	-15.1674	-15.2799	-15.1208	-13.919	-15.2368	-15.1825
b3755	yieP	chr	-	3938657,	3939350,	-12.7321	-12.7778	-12.7336	-12.955	-13.1877	-12.8653	-13.4677	-13.4439	-13.2879	-12.7476	-13.0559	-13.3944
b3764	yifE	chr	+	3946108,	3946447,	-10.8679	-10.8571	-10.8131	-10.1371	-10.1425	-10.0521	-9.9945	-10.0045	-10.0062	-10.8484	-10.1269	-10.0016
b3775	ppiC	chr	-	3957554,	3957836,	-13.2677	-13.2018	-13.2888	-13.63	-13.7258	-13.4441	-13.8266	-13.6904	-13.8231	-13.2513	-13.6486	-13.7839
b3778	rep	chr	+	3958699,	3960721,	-14.0074	-14.0235	-14.1069	-14.1521	-14.0872	-14.2208	-14.4972	-14.6035	-14.5358	-14.0406	-14.1279	-14.5417
b3779	gpp	chr	-	3960767,	3962252,	-14.1251	-14.1762	-14.1515	-14.2643	-14.2957	-14.4754	-14.7262	-14.5951	-14.7133	-14.1495	-14.3103	-14.6818
b3781	trxA	chr	+	3963783,	3964113,	-10.1442	-10.1129	-10.1534	-10.4115	-10.4571	-10.2936	-10.458	-10.4596	-10.5069	-10.1363	-10.4165	-10.4757
b3784	rfe	chr	+	3965938,	3967042,	-12.0579	-12.0817	-12.0124	-12.5229	-12.518	-12.5204	-12.8581	-12.9233	-12.7869	-12.0525	-12.52	-12.851
b3787	rffD	chr	+	3969282,	3970545,	-12.7371	-12.7012	-12.7336	-12.766	-12.763	-12.6973	-12.7635	-12.7522	-12.8941	-12.7241	-12.7541	-12.8052
b3788	rffG	chr	+	3970544,	3971612,	-13.6523	-13.606	-13.6503	-13.4814	-13.534	-13.4945	-13.4262	-13.4899	-13.3689	-13.6362	-13.5103	-13.4238
b3792	wzxE	chr	+	3974300,	3975551,	-15.1514	-15.103	-15.0707	-15.5597	-15.5171	-15.2208	-15.9435	-15.892	-15.7829	-15.1118	-15.4827	-15.8696
b3793	wzyE	chr	+	3976623,	3977976,	-15.278	-15.2347	-15.0101	-15.7237	-15.7966	-15.8164	-15.8903	-15.6994	-16.1009	-15.1823	-15.7747	-15.8998
b3795	yifK	chr	+	3978909,	3980295,	-15.4819	-15.4156	-15.4374	-15.6331	-15.7001	-15.6359	-16.0175	-16.3209	-16.1208	-15.4468	-15.6678	-16.1386
b3802	hemY	chr	-	3984708,	3985905,	-13.1657	-13.1839	-13.2278	-13.3416	-13.2909	-13.4318	-13.6251	-13.4477	-13.4421	-13.1893	-13.328	-13.5052
b3804	hemD	chr	-	3987110,	3987851,	-15.2904	-15.2957	-15.4252	-15.4342	-15.8149	-15.1998	-15.3706	-15.8315	-15.4327	-15.3295	-15.5763	-15.5157
b3810	yigA	chr	+	3993605,	3994313,	-14.6376	-14.8463	-14.6593	-14.5959	-14.5246	-14.594	-14.1993	-14.1326	-14.3307	-14.7102	-14.5583	-14.224
b3812	yigB	chr	+	3995205,	3995922,	-14.4513	-14.5042	-14.286	-14.5959	-14.4442	-14.4503	-14.484	-14.8414	-14.4898	-14.4187	-14.4941	-14.5828
b3813	uvrD	chr	+	3996005,	3998168,	-13.4783	-13.4646	-13.4297	-13.4233	-13.4765	-13.6789	-13.7536	-13.6333	-13.6871	-13.4597	-13.4865	-13.6937
b3816	corA	chr	+	3999448,	4000399,	-12.169	-12.2766	-12.195	-12.4452	-12.3901	-12.4722	-12.5022	-12.5456	-12.4801	-12.2115	-12.4203	-12.5069
b3821	pldA	chr	+	4002884,	4003754,	-12.9033	-12.9285	-12.824	-12.8097	-12.9713	-12.8204	-12.8142	-12.7973	-12.8498	-12.8883	-12.8927	-12.8217
b3825	pldB	chr	+	4007192,	4008215,	-15.1705	-15.0455	-15.1743	-15.339	-15.1729	-15.7233	-15.7108	-15.3489	-15.8478	-15.1288	-15.2986	-15.6378
b3831	udp	chr	+	4014453,	4015215,	-10.308	-10.3341	-10.2495	-9.88332	-9.84289	-10.0741	-9.64631	-9.57942	-9.61695	-10.2995	-9.88864	-9.61589
b3834	yigP	chr	+	4017646,	4018252,	-13.7478	-13.7862	-13.6955	-13.6268	-13.6917	-13.5074	-13.4452	-13.4251	-13.4547	-13.7451	-13.6412	-13.4426
b3835	ubiB	chr	+	4018248,	4019889,	-14.5377	-14.3469	-14.4842	-14.3858	-14.6297	-14.7233	-14.8391	-14.8022	-14.9961	-14.4566	-14.5563	-14.8816
b3836	tatA	chr	+	4019967,	4020237,	-11.3953	-11.3144	-11.3681	-11.7851	-11.7725	-11.627	-11.8152	-11.7233	-11.8634	-11.3602	-11.7541	-11.8041
b3838	tatB	chr	+	4020240,	4020756,	-13.9323	-13.8873	-13.992	-14.3086	-14.3647	-14.2749	-14.7735	-14.8315	-14.6254	-13.9338	-14.3322	-14.7353
b4483	tatD	chr	+	4021576,	4022359,	-15.0633	-14.9979	-15.0239	-15.5013	-15.2578	-15.1998	-15.2996	-15.1884	-15.5358	-15.03	-15.3254	-15.3437
b3843	ubiD	chr	+	4023010,	4024504,	-11.9294	-11.9224	-11.9383	-12.3238	-12.4478	-12.4104	-12.3889	-12.4289	-12.3644	-11.9296	-12.3997	-12.3917
b3847	pepQ	chr	+	4029183,	4030515,	-11.63	-11.6929	-11.641	-10.9624	-11.0468	-11.0988	-10.935	-10.966	-10.9967	-11.6538	-11.0255	-10.9659
b3849	trkH	chr	+	4031167,	4032619,	-14.3242	-14.1199	-14.2999	-14.5302	-14.4729	-14.4256	-14.7031	-14.6815	-14.942	-14.2463	-14.4846	-14.7768
b3859	rdoA	chr	+	4040437,	4041424,	-14.3986	-14.474	-14.4374	-14.4125	-14.348	-14.8164	-14.9525	-14.9339	-15.1614	-14.4345	-14.4308	-15.0176
b3860	dsbA	chr	+	4041440,	4042067,	-10.2002	-10.1675	-10.2289	-10.6307	-10.6313	-10.5542	-10.7876	-10.7973	-10.8226	-10.1973	-10.6194	-10.8028
b3865	yihA	chr	-	4048155,	4048788,	-12.1012	-12.137	-12.1167	-12.1533	-12.1634	-12.1037	-12.3782	-12.3542	-12.2518	-12.1175	-12.151	-12.3251
b3870	glnA	chr	-	4054647,	4056057,	-9.83053	-9.83191	-9.8623	-9.61982	-9.61768	-9.61261	-9.52223	-9.51651	-9.51262	-9.84002	-9.61764	-9.51712
b3887	dtd	chr	+	4075037,	4075475,	-15.2946	-15.3847	-15.2695	-15.2498	-15.2087	-15.4256	-14.6581	-14.5215	-14.5696	-15.3166	-15.2528	-14.5852
b3891	fdhE	chr	-	4078321,	4079251,	-12.2108	-12.2278	-12.1452	-11.8474	-11.9409	-11.9203	-11.4238	-11.3748	-11.4234	-12.1973	-11.9059	-11.409
b3892	fdoI	chr	-	4079247,	4079883,	-11.9234	-11.9666	-11.8824	-11.6136	-11.6843	-11.6917	-10.8428	-10.8545	-10.8114	-11.9256	-11.6614	-10.835
b3893	fdoH	chr	-	4079879,	4080782,	-11.7546	-11.7296	-11.7131	-11.2974	-11.3471	-11.3864	-10.529	-10.5175	-10.5205	-11.7343	-11.336	-10.5226
b3915	fieF	chr	+	4104491,	4105394,	-13.9453	-13.8783	-13.8751	-14.1612	-14.2578	-14.3775	-14.7655	-14.5619	-14.5358	-13.9025	-14.2415	-14.6201
b3916	pfkA	chr	+	4105574,	4106537,	-10.023	-10.03	-10.025	-10.3137	-10.3335	-10.3246	-10.4199	-10.356	-10.3228	-10.0259	-10.3255	-10.3659
b3925	glpX	chr	-	4112591,	4113602,	-13.1076	-13.0895	-13.1465	-13.1863	-13.1699	-13.3894	-13.2074	-13.3775	-13.2656	-13.1125	-13.206	-13.2766
b3928	yiiU	chr	+	4116537,	4116783,	-11.435	-11.508	-11.4405	-11.1398	-11.1836	-11.0556	-10.7046	-10.7119	-10.7433	-11.4605	-11.1493	-10.7204
b3933	ftsN	chr	-	4120402,	4121362,	-13.2453	-13.3494	-13.3685	-13.6842	-13.6399	-13.3835	-13.7735	-13.9606	-13.7593	-13.3141	-13.613	-13.821
b3936	rpmE	chr	+	4125035,	4125248,	-8.28092	-8.29105	-8.19601	-8.8198	-8.80489	-8.75537	-9.02802	-9.00783	-9.02318	-8.25939	-8.80237	-9.02032
b3940	metL	chr	+	4127857,	4130290,	-13.3414	-13.2649	-13.2264	-13.2987	-13.3563	-13.3716	-13.5824	-13.6119	-13.4801	-13.2822	-13.339	-13.5536
b3942	katG	chr	+	4131857,	4134038,	-11.4905	-11.4552	-11.4933	-11.3805	-11.3949	-11.4089	-11.2451	-11.2681	-11.3206	-11.4795	-11.3921	-11.2784
b3955	yijP	chr	-	4146554,	4148288,	-13.0281	-13.1263	-13.168	-13.233	-13.1641	-12.942	-13.6251	-13.6594	-13.7711	-13.0996	-13.151	-13.6857
b3960	argH	chr	+	4154872,	4156246,	-14.7506	-14.662	-14.6204	-14.5838	-14.6217	-15.0795	-14.7735	-14.7829	-14.9331	-14.6828	-14.6678	-14.8312
b3963	fabR	chr	+	4159146,	4159794,	-14.0125	-13.9614	-14.1093	-14.4287	-14.3054	-14.3196	-14.5239	-14.4066	-14.3898	-14.0221	-14.3476	-14.4404
b3964	yijD	chr	+	4159793,	4160153,	-12.9209	-12.9341	-12.8291	-12.8675	-12.8046	-12.8488	-12.3376	-12.4011	-12.3763	-12.8983	-12.8319	-12.3699
b3966	btuB	chr	+	4161661,	4163506,	-11.7807	-11.7512	-11.821	-12.151	-12.1803	-12.1209	-12.4726	-12.3226	-12.4065	-11.7822	-12.1615	-12.4036
b3972	murB	chr	+	4170079,	4171108,	-13.2967	-13.2567	-13.2777	-13.3036	-13.3697	-13.2804	-13.8308	-13.9076	-13.9244	-13.2779	-13.3339	-13.8861
b3981	secE	chr	+	4175380,	4175764,	-10.7266	-10.7473	-10.7704	-11.0263	-11.0899	-11.2653	-11.7233	-11.7534	-11.6806	-10.7459	-11.0927	-11.7167
b3984	rplA	chr	+	4176901,	4177606,	-7.28395	-7.27777	-7.29487	-7.33591	-7.35115	-7.30064	-7.66832	-7.65802	-7.68934	-7.28501	-7.33845	-7.6727
b3985	rplJ	chr	+	4178018,	4178516,	-6.99527	-6.96725	-7.03683	-7.43286	-7.4233	-7.25605	-7.70141	-7.68545	-7.69585	-6.99759	-7.40034	-7.69471
b3986	rplL	chr	+	4178582,	4178948,	-6.30232	-6.30695	-6.33594	-6.73316	-6.74807	-6.61937	-7.34457	-7.37466	-7.3887	-6.31342	-6.72329	-7.36902
b3987	rpoB	chr	+	4179267,	4183296,	-7.3699	-7.39795	-7.36793	-7.41691	-7.40425	-7.43166	-8.17867	-8.17859	-8.18177	-7.3786	-7.41251	-8.17975
b3988	rpoC	chr	+	4183372,	4187596,	-7.66946	-7.65351	-7.6732	-8.05973	-8.05598	-8.03463	-8.47636	-8.48764	-8.49122	-7.6652	-8.05404	-8.48496
b3997	hemE	chr	+	4195738,	4196803,	-12.0329	-11.9999	-11.9641	-12.1589	-12.1996	-12.2182	-12.2006	-12.19	-12.226	-12.0019	-12.1886	-12.2064
b4001	yjaH	chr	+	4198588,	4199284,	-13.8348	-13.3898	-13.6083	-14.5959	-14.7432	-14.3775	-15.6215	-15.9769	-16.0619	-13.6097	-14.6339	-15.8696
b4014	aceB	chr	+	4213500,	4215102,	-12.5652	-12.5371	-12.5937	-12.3727	-12.472	-12.3367	-11.6479	-11.7651	-11.738	-12.5638	-12.4176	-11.7137
b4015	aceA	chr	+	4215131,	4216436,	-10.782	-10.7997	-10.7593	-10.7695	-10.7465	-10.7451	-9.77855	-9.78741	-9.76886	-10.7813	-10.7539	-9.7777
b4018	iclR	chr	-	4220826,	4221651,	-14.8032	-14.8082	-14.9003	-14.924	-14.7966	-15.179	-15.3229	-15.1144	-15.2573	-14.832	-14.8902	-15.2356
b4024	lysC	chr	-	4229906,	4231256,	-15.0633	-14.8534	-15.0803	-15.1657	-15.1265	-15.0229	-15.8903	-15.2664	-15.3482	-14.9946	-15.1235	-15.4878
b4034	malE	chr	-	4243251,	4244442,	-9.87781	-9.90646	-9.88593	-9.6562	-9.65343	-9.57569	-9.06847	-9.07992	-9.05918	-9.88961	-9.64254	-9.06852
b4036	lamB	chr	+	4245993,	4247334,	-10.2142	-10.2333	-10.1721	-9.3946	-9.41376	-9.46671	-8.76554	-8.73174	-8.71516	-10.2083	-9.41503	-8.7375
b4037	malM	chr	+	4247576,	4248497,	-12.1772	-12.2737	-12.2894	-11.7973	-11.7416	-11.8224	-10.2584	-10.392	-10.3188	-12.2406	-11.7718	-10.3183
b4039	ubiC	chr	+	4250528,	4251026,	-15.6009	-15.5635	-15.3539	-16.0863	-15.97	-15.5804	-16.1361	-16.1387	-16.141	-15.5138	-15.9412	-16.1386
b4040	ubiA	chr	+	4251038,	4251911,	-13.0368	-13.2428	-13.0506	-13.3238	-13.3347	-13.2971	-13.3406	-13.2664	-13.4111	-13.1062	-13.3254	-13.3426
b4046	zur	chr	-	4257510,	4258026,	-14.7884	-14.6375	-14.7747	-14.717	-14.9148	-14.5269	-14.4516	-14.7084	-14.7285	-14.7327	-14.784	-14.6201
b4077	gltP	chr	+	4292503,	4293817,	-13.8485	-13.7794	-13.7923	-14.4842	-14.3151	-14.6218	-14.4645	-14.5215	-14.6541	-13.8091	-14.4127	-14.5464
b4078	yjcO	chr	-	4294458,	4295148,	-15.2988	-15.3796	-15.3481	-15.6584	-15.4442	-15.3775	-15.484	-15.5295	-15.4705	-15.3394	-15.5017	-15.4924
b4125	dcuS	chr	-	4348053,	4349685,	-15.5011	-15.5463	-15.5065	-16.121	-16.3151	-15.916	-16.3346	-16.8119	-16.0428	-15.5175	-16.1836	-16.3395
b4129	lysU	chr	-	4351222,	4352740,	-9.60709	-9.60542	-9.6178	-9.63348	-9.64422	-9.61741	-9.90701	-9.90336	-9.90781	-9.60959	-9.63662	-9.90622
b4136	dipZ	chr	-	4361367,	4363065,	-13.3998	-13.3432	-13.398	-13.4098	-13.4513	-13.5601	-13.8947	-13.8464	-13.8231	-13.3802	-13.4528	-13.8547
b4142	groS	chr	+	4368710,	4369004,	-10.6302	-10.5897	-10.6202	-10.5266	-10.5428	-10.6332	-10.1274	-10.1952	-10.1887	-10.6138	-10.5504	-10.1689
b4143	groL	chr	+	4369047,	4370694,	-8.14318	-8.14422	-8.16355	-7.94105	-7.95388	-7.98115	-7.95591	-7.94276	-7.95036	-8.14934	-7.95359	-7.95005
b4169	amiB	chr	+	4394087,	4395425,	-14.4867	-14.4104	-14.3224	-14.5657	-14.5704	-14.4628	-14.7816	-14.8217	-14.5696	-14.4127	-14.5523	-14.7137
b4170	mutL	chr	+	4395434,	4397282,	-14.8859	-14.6284	-14.6379	-15.1932	-14.9802	-14.9863	-15.593	-15.4214	-15.5358	-14.7241	-15.0489	-15.5203
b4171	miaA	chr	+	4397274,	4398225,	-14.0544	-14.1178	-14.1093	-14.1123	-14.2453	-14.2639	-14.5375	-14.4591	-14.3134	-14.0909	-14.2021	-14.4315
b4175	hflC	chr	+	4401322,	4402327,	-11.2549	-11.1817	-11.1969	-11.3118	-11.3936	-11.3497	-11.6107	-11.6804	-11.6316	-11.2136	-11.3593	-11.6384
b4200	rpsF	chr	+	4423140,	4423536,	-7.46528	-7.52066	-7.47169	-7.67177	-7.63954	-7.62891	-7.72695	-7.75147	-7.75009	-7.48532	-7.64863	-7.74237
b4201	priB	chr	+	4423542,	4423857,	-12.1182	-12.2074	-12.1069	-12.888	-12.8346	-12.9332	-13.0104	-13.0157	-13.0007	-12.1439	-12.8666	-13.0085
b4202	rpsR	chr	+	4423861,	4424089,	-8.41303	-8.44069	-8.42791	-8.41341	-8.39212	-8.35882	-8.29007	-8.31635	-8.30255	-8.42644	-8.39418	-8.30222
b4208	cycA	chr	+	4427886,	4429299,	-15.9836	-15.8927	-15.7289	-15.8492	-16.0542	-15.882	-16.3112	-16.3775	-16.0619	-15.8767	-15.9568	-16.2356
b4217	ytfK	chr	+	4437609,	4437816,	-12.6677	-12.6292	-12.6764	-12.7473	-12.7686	-12.4318	-12.2739	-12.3401	-12.357	-12.6573	-12.7064	-12.3225
b4218	ytfL	chr	-	4437894,	4439238,	-14.4606	-14.474	-14.5227	-14.7921	-14.7876	-15.0045	-15.6072	-15.5456	-15.4833	-14.4826	-14.8193	-15.544
b4220	ytfM	chr	+	4440404,	4442138,	-14.3009	-14.3519	-14.264	-14.6021	-14.7172	-14.3658	-15.0756	-14.966	-14.9509	-14.3069	-14.6213	-14.9978
b4221	ytfN	chr	+	4442134,	4445914,	-13.4513	-13.4339	-13.4297	-13.9011	-13.7454	-13.9684	-14.0608	-13.966	-13.9509	-13.4393	-13.8277	-13.9929
b4233	mpl	chr	+	4453807,	4455181,	-11.626	-11.6239	-11.559	-11.8257	-11.7086	-11.8448	-11.7665	-11.8477	-11.7879	-11.6058	-11.7667	-11.7977
b4235	pmbA	chr	+	4455981,	4457334,	-12.0316	-12.0038	-12.0506	-12.233	-12.2477	-12.1713	-12.2361	-12.2866	-12.1966	-12.0277	-12.2312	-12.2365
b4242	mgtA	chr	+	4465647,	4468344,	-10.6069	-10.6058	-10.6215	-11.8302	-11.8729	-11.7177	-11.8152	-11.9459	-11.8343	-10.6107	-11.8346	-11.8595
b4243	yjgF	chr	-	4468549,	4468936,	-10.6718	-10.6815	-10.6746	-10.34	-10.3366	-10.3984	-10.0889	-10.0865	-10.1074	-10.6758	-10.3467	-10.0947
b4259	holC	chr	-	4481859,	4482303,	-15.6916	-15.5693	-15.5996	-15.8639	-15.8904	-15.8488	-16.4074	-16.3209	-16.5903	-15.6236	-15.8753	-16.4426
b4261	yjgP	chr	+	4484240,	4485341,	-13.2883	-13.1674	-13.2586	-13.2188	-13.3216	-13.4074	-13.6507	-13.6949	-13.6723	-13.2386	-13.2986	-13.6713
b4262	yjgQ	chr	+	4485340,	4486423,	-13.7083	-13.7155	-13.7459	-13.7991	-13.7921	-13.9954	-13.93	-14.1387	-14.2246	-13.7214	-13.8229	-14.0907
b4263	yjgR	chr	-	4486583,	4488086,	-15.303	-15.3544	-15.4435	-15.5013	-15.4948	-15.3775	-15.7735	-15.629	-15.8644	-15.3592	-15.4789	-15.7601
b4280	yjhC	chr	+	4503309,	4504428,	-12.8455	-12.8202	-12.7972	-12.7764	-12.9135	-12.6899	-12.6636	-12.6572	-12.6908	-12.8231	-12.8319	-12.6713
b4324	uxuR	chr	+	4552598,	4553372,	-14.5881	-14.578	-14.5894	-14.5419	-14.5059	-14.6501	-14.6	-14.5619	-14.4898	-14.5851	-14.5385	-14.5488
b4352	yjiA	chr	-	4585931,	4586888,	-13.5614	-13.4945	-13.526	-13.357	-13.4265	-13.4565	-12.808	-12.7758	-12.8231	-13.5287	-13.4073	-12.8037
b4354	yjiY	chr	-	4587151,	4589302,	-14.9802	-14.8219	-14.9607	-14.1748	-14.3054	-14.6789	-12.1939	-12.2285	-12.1183	-14.9202	-14.3086	-12.1765
b4359	mdoB	chr	-	4595172,	4597464,	-12.976	-12.9303	-12.8855	-12.9927	-13.0597	-13.0415	-13.5824	-13.5909	-13.6432	-12.9344	-13.0343	-13.6063
b4360	yjjA	chr	-	4597717,	4598212,	-14.2352	-14.1391	-14.2722	-14.4233	-14.4802	-14.5534	-14.6507	-14.7176	-14.7361	-14.2128	-14.4714	-14.7003
b4372	holD	chr	+	4605825,	4606239,	-15.1782	-15.1762	-15.1093	-15.37	-15.416	-15.6644	-15.5239	-15.8514	-15.5765	-15.1574	-15.4344	-15.6327
b4374	yjjG	chr	+	4606668,	4607346,	-13.5476	-13.542	-13.5276	-13.6362	-13.6542	-13.6218	-13.9616	-13.9769	-13.8941	-13.54	-13.6433	-13.9417
b4376	osmY	chr	+	4609418,	4610024,	-14.6218	-14.7946	-14.6773	-14.4342	-14.4549	-14.6218	-14.3827	-14.356	-14.3898	-14.6933	-14.4714	-14.3773
b4383	deoB	chr	+	4617625,	4618849,	-10.5769	-10.6196	-10.5843	-10.5864	-10.6042	-10.5204	-10.5499	-10.539	-10.4943	-10.5931	-10.5855	-10.5267
b4384	deoD	chr	+	4618905,	4619625,	-10.2851	-10.2899	-10.2929	-9.80526	-9.82861	-9.93378	-9.5923	-9.54281	-9.57067	-10.2889	-9.83582	-9.56987
b4401	arcA	chr	-	4637612,	4638329,	-10.3246	-10.322	-10.3797	-10.6036	-10.5648	-10.5459	-10.9189	-10.9694	-10.9509	-10.3393	-10.5748	-10.945

## Sheet: (WT, C) < M
# Note: These are taken only from the case where both comparisons are significant						Replicates Separate									Replicates Combined									Fold Change
Name	Name2	Chr	Strand	Start	End	WT_1	WT_2	WT_3	M_1	M_2	M_3	C_1	C_2	C_3	WT_(1,2,3)	M_(1,2,3)	C_(1,2,3)	WT/M p-value	WT/M BH q-value	C/M p-value	C/M BH q-value	WT – M	C – M	WT/ M	C / M
b0015	dnaJ	chr	+	14167,	15298,	-12.1922	-12.1978	-12.161	-11.6728	-11.7204	-11.6394	-11.9333	-11.8972	-11.9665	-12.1851	-11.6922	-11.9342	0.000370998	0.00280168	0.00131051	0.00525752	-0.492885	-0.242046	0.710602	0.845545
b0027	lspA	chr	+	25206,	25701,	-14.2842	-14.4525	-14.2668	-13.6842	-13.7542	-13.8084	-14.2265	-14.1696	-14.2032	-14.3328	-13.7382	-14.2012	0.00240519	0.00825606	0.00196271	0.00654481	-0.594617	-0.463045	0.66222	0.725454
b0051	ksgA	chr	-	51608,	52430,	-12.9339	-12.8604	-12.9237	-12.3049	-12.3331	-12.2666	-12.7655	-12.9579	-12.8029	-12.9062	-12.3136	-12.8333	4.49988e-05	0.000930434	0.00691484	0.0152149	-0.592558	-0.519734	0.663166	0.6975
b0058	rluA	chr	-	59686,	60346,	-15.3457	-15.3199	-15.413	-15.2118	-15.2208	-15.1585	-15.6507	-15.6994	-15.5225	-15.3559	-15.2084	-15.6175	0.0114053	0.0222618	0.00832192	0.0174235	-0.147522	-0.409159	0.9028	0.753062
b0082	mraW	chr	+	90093,	91035,	-13.3566	-13.3432	-13.3787	-12.9511	-12.9086	-13.0183	-13.1387	-13.1916	-13.2059	-13.3584	-12.9386	-13.1779	0.00331759	0.00992557	0.00716628	0.0155388	-0.419802	-0.239297	0.747527	0.847158
b0089	ftsW	chr	+	98402,	99647,	-14.1976	-14.3669	-14.2264	-13.6552	-13.8427	-13.6644	-14.0905	-14.4744	-14.2795	-14.2602	-13.7507	-14.2628	0.00272345	0.00887554	0.019794	0.0333967	-0.509597	-0.512157	0.702419	0.701173
b0102	yacF	chr	-	111855,	112599,	-13.3274	-13.2802	-13.3539	-12.9728	-12.9687	-12.8366	-13.2938	-13.2565	-13.2935	-13.319	-12.9496	-13.2826	0.00480255	0.0125809	0.0109629	0.0215698	-0.369335	-0.332955	0.774139	0.793909
b0113	pdhR	chr	+	122091,	122856,	-14.3414	-14.5069	-14.3832	-13.7405	-13.8218	-13.8407	-14.0657	-14.2204	-14.2573	-14.4066	-13.7969	-14.177	0.0011683	0.00528631	0.0103145	0.0206479	-0.609787	-0.380107	0.655294	0.768381
b0120	speD	chr	-	134787,	135582,	-12.857	-12.9557	-12.9454	-12.2606	-12.3538	-12.2831	-13.0342	-13.2204	-12.9846	-12.9144	-12.3115	-13.0682	0.000132805	0.00171084	0.00370808	0.00982106	-0.602894	-0.756684	0.658432	0.591855
b0124	gcd	chr	-	138834,	141225,	-15.5652	-15.5293	-15.3832	-14.8936	-14.97	-15.0795	-15.458	-15.4515	-15.6325	-15.4991	-14.9595	-15.5157	0.00274091	0.00890432	0.0027384	0.00812615	-0.539601	-0.556193	0.687961	0.680094
b0126	can	chr	-	142007,	142670,	-11.9507	-11.8155	-11.8945	-11.3358	-11.3249	-11.4059	-11.5956	-11.489	-11.5535	-11.8885	-11.3403	-11.5485	0.000769185	0.00419033	0.00982816	0.0199959	-0.548172	-0.208215	0.683886	0.865608
b0143	pcnB	chr	-	157728,	159126,	-12.7745	-12.7711	-12.6946	-12.4871	-12.5115	-12.6078	-13.2458	-13.2968	-13.3689	-12.75	-12.5171	-13.3037	0.0121556	0.02327	0.000116745	0.00125329	-0.232941	-0.786579	0.850898	0.579717
b0154	hemL	chr	-	173601,	174882,	-10.6989	-10.7175	-10.7135	-10.062	-10.1108	-10.1055	-10.4873	-10.524	-10.4785	-10.7093	-10.0935	-10.4949	0.00015349	0.00189462	4.48993e-05	0.000775286	-0.615723	-0.401345	0.652603	0.757152
b0156	yadR	chr	+	176609,	176954,	-12.3511	-12.4326	-12.4078	-12.0408	-12.0576	-12.0891	-12.348	-12.3793	-12.2851	-12.394	-12.0566	-12.3343	0.000872436	0.00449642	0.00314439	0.00878343	-0.337394	-0.277719	0.79147	0.824894
b0168	map	chr	-	188711,	189506,	-11.4825	-11.5198	-11.5289	-11.2558	-11.2442	-11.205	-11.5572	-11.5466	-11.5929	-11.508	-11.2421	-11.5666	0.000199656	0.0020432	9.68549e-05	0.00112767	-0.265897	-0.324464	0.831681	0.798595
b0170	tsf	chr	+	190856,	191708,	-7.8449	-7.87196	-7.84756	-7.20864	-7.18825	-7.2045	-7.65528	-7.66605	-7.6517	-7.85461	-7.19744	-7.65717	1.24791e-06	0.000323462	1.72456e-06	0.000171672	-0.657172	-0.459731	0.63412	0.727122
b0180	fabZ	chr	+	202100,	202556,	-9.87898	-9.85876	-9.85844	-9.60014	-9.60446	-9.52323	-10.3744	-10.4039	-10.3733	-9.86634	-9.59068	-10.3826	0.00560472	0.0135709	0.000277701	0.00212428	-0.275663	-0.791956	0.826071	0.57756
b0182	lpxB	chr	+	203347,	204496,	-14.1609	-14.1718	-14.351	-13.8712	-13.905	-13.882	-14.6729	-14.5619	-14.6541	-14.2166	-13.8902	-14.6327	0.0283905	0.0439712	0.00105449	0.00463723	-0.326382	-0.742495	0.797534	0.597705
b0185	accA	chr	+	208620,	209580,	-10.4319	-10.4637	-10.4433	-10.0973	-10.0667	-10.1471	-10.36	-10.327	-10.2597	-10.4457	-10.0886	-10.3139	0.0016955	0.00675117	0.00571146	0.0132614	-0.357105	-0.225364	0.780729	0.855379
b0194	proS	chr	-	217056,	218775,	-9.96871	-10.0094	-9.98634	-9.7287	-9.72502	-9.79159	-10.2132	-10.1201	-10.2016	-9.9872	-9.73595	-10.181	0.00201822	0.00749091	0.00046571	0.00298218	-0.251256	-0.445075	0.840165	0.734546
b0238	gpt	chr	+	255976,	256435,	-10.68	-10.6603	-10.6243	-10.3805	-10.4032	-10.3418	-11.1207	-11.161	-11.1327	-10.6573	-10.3864	-11.1368	0.000339175	0.00270787	1.4111e-05	0.000482861	-0.270939	-0.75041	0.82878	0.594435
b0287	yagU	chr	+	302214,	302829,	-14.0473	-14.0658	-14.1718	-13.7371	-13.5359	-13.6359	-14.317	-14.3631	-14.1822	-14.0882	-13.6151	-14.2806	0.00443795	0.0121186	0.00123459	0.00512076	-0.473052	-0.665495	0.720439	0.630472
b0405	queA	chr	+	424234,	425305,	-13.3295	-13.3644	-13.2438	-12.7851	-12.7966	-12.7158	-13.2514	-13.3667	-13.1744	-13.3157	-12.7805	-13.2559	0.000437027	0.00312774	0.00510554	0.0121799	-0.535226	-0.475429	0.69005	0.719253
b0406	tgt	chr	+	425360,	426488,	-11.9933	-12.0004	-12.0101	-11.8115	-11.864	-11.8695	-12.3039	-12.1964	-12.2032	-12.0005	-11.847	-12.2356	0.0103462	0.0206735	0.0021077	0.00680806	-0.153435	-0.388527	0.899107	0.763909
b0415	ribE	chr	+	433870,	434341,	-11.5993	-11.5726	-11.5561	-10.8988	-10.9745	-10.9474	-11.7214	-11.8107	-11.772	-11.5779	-10.9448	-11.7653	9.49946e-05	0.00138692	2.06188e-05	0.000550672	-0.63317	-0.82053	0.644758	0.566234
b0417	thiL	chr	+	434857,	435835,	-14.1976	-14.413	-14.2424	-13.5419	-13.5998	-13.7769	-14.4012	-14.2598	-14.3077	-14.279	-13.6048	-14.3251	0.00265373	0.00883231	0.00271771	0.00812615	-0.674235	-0.720264	0.626664	0.606987
b0418	pgpA	chr	+	435812,	436331,	-14.8002	-14.8569	-14.9173	-14.1166	-14.138	-14.4881	-15.2101	-15.0326	-14.9778	-14.8518	-14.1775	-15.0716	0.0292934	0.0451143	0.00786506	0.016788	-0.674352	-0.894154	0.626614	0.538063
b0421	ispA	chr	-	439425,	440325,	-13.3457	-13.4052	-13.3424	-12.9767	-12.9001	-13.0699	-13.4807	-13.2968	-13.2851	-13.3642	-12.9496	-13.3541	0.00807836	0.0170197	0.0112278	0.0217987	-0.414591	-0.40444	0.750232	0.755529
b0423	thiI	chr	+	440772,	442221,	-12.1154	-12.1226	-12.1377	-11.6441	-11.7503	-11.7065	-12.301	-12.1806	-12.2354	-12.1242	-11.7075	-12.2413	0.00384284	0.0109176	0.000344325	0.00243249	-0.416627	-0.533816	0.749174	0.690725
b0436	tig	chr	+	454356,	455655,	-7.51978	-7.54676	-7.52806	-7.11089	-7.12193	-7.19959	-7.3081	-7.32545	-7.29728	-7.53108	-7.12947	-7.30933	0.00300567	0.00940344	0.0201735	0.0338513	-0.40161	-0.179855	0.757013	0.882792
b0437	clpP	chr	+	455900,	456524,	-11.2237	-11.2284	-11.2211	-11.0486	-11.0778	-10.9988	-11.1099	-11.1587	-11.1894	-11.2245	-11.0561	-11.1522	0.0149691	0.0268708	0.0274076	0.0430327	-0.168447	-0.0960949	0.8898	0.935562
b0438	clpX	chr	+	456649,	457924,	-10.6558	-10.63	-10.605	-10.486	-10.4953	-10.5434	-10.8444	-10.8137	-10.9189	-10.6325	-10.4992	-10.8612	0.00675724	0.015256	0.00179998	0.00627378	-0.133305	-0.361964	0.91174	0.778105
b0439	lon	chr	+	458111,	460466,	-10.8861	-10.9013	-10.9184	-10.7695	-10.808	-10.7662	-10.9887	-10.9831	-10.9773	-10.9003	-10.7888	-10.983	0.00278195	0.00894229	0.0028837	0.008398	-0.111516	-0.19415	0.925615	0.874088
b0444	queC	chr	-	464075,	464771,	-13.1039	-13.1167	-13.1365	-12.6425	-12.5889	-12.6789	-13.2598	-13.2012	-13.2573	-13.1175	-12.6198	-13.2413	0.00110255	0.00515939	9.21252e-05	0.00112767	-0.497674	-0.621571	0.708248	0.649963
b0458	ylaC	chr	-	478004,	478475,	-12.6882	-12.7778	-12.8422	-12.4301	-12.4675	-12.4503	-12.837	-12.713	-12.815	-12.7607	-12.4523	-12.7916	0.0148035	0.0267488	0.00842808	0.0175786	-0.30839	-0.339297	0.807543	0.790427
b0472	recR	chr	+	493628,	494234,	-14.182	-14.1608	-14.3111	-13.9668	-13.9649	-14.0699	-14.1569	-14.2598	-14.2032	-14.2106	-13.9806	-14.2031	0.0236153	0.0379161	0.0113172	0.0219333	-0.229918	-0.222486	0.852683	0.857087
b0473	htpG	chr	+	494343,	496218,	-10.8841	-10.8879	-10.8653	-10.5273	-10.5533	-10.5744	-10.6599	-10.6061	-10.6636	-10.8799	-10.5476	-10.6451	0.000230191	0.00218735	0.0194944	0.0330952	-0.332309	-0.0974994	0.794264	0.934652
b0474	adk	chr	+	496398,	497043,	-10.3979	-10.3938	-10.3745	-9.78009	-9.78521	-9.82749	-10.1595	-10.1197	-10.1489	-10.3898	-9.78969	-10.1439	6.85159e-05	0.00119087	8.05334e-05	0.0011023	-0.600111	-0.354209	0.659703	0.782298
b0475	hemH	chr	+	497278,	498241,	-14.7709	-14.8463	-14.6415	-14.4125	-14.2957	-14.4014	-14.688	-14.6904	-14.7285	-14.7566	-14.3493	-14.703	0.00914273	0.0185814	0.00684662	0.0151456	-0.407283	-0.353639	0.754042	0.782608
b0477	gsk	chr	+	499348,	500653,	-12.7258	-12.7811	-12.7913	-12.0325	-11.9668	-11.9818	-12.1886	-12.2614	-12.1914	-12.7627	-11.9907	-12.2107	1.10206e-05	0.000676843	0.00235441	0.00738705	-0.771973	-0.220014	0.585616	0.858557
b0523	purE	chr	-	551813,	552323,	-14.4724	-14.3949	-14.3861	-14.0777	-13.8711	-14.0795	-14.4136	-14.4978	-14.36	-14.4214	-13.9674	-14.4183	0.0169036	0.0293336	0.011779	0.0225489	-0.453983	-0.45094	0.730025	0.731566
b0526	cysS	chr	+	553833,	555219,	-11.2262	-11.2399	-11.2354	-11.0161	-10.9671	-11.0723	-11.3003	-11.222	-11.2949	-11.2334	-10.9986	-11.2749	0.0179236	0.0307141	0.00336787	0.00919655	-0.234789	-0.27631	0.849809	0.8257
b0529	folD	chr	-	556097,	556964,	-11.7969	-11.7686	-11.7275	-11.3891	-11.3893	-11.3746	-11.9189	-11.9539	-12.0088	-11.7673	-11.387	-11.9607	0.00176218	0.00691608	0.00152404	0.00563793	-0.380302	-0.573631	0.768277	0.671923
b0565	ompT	chr	-	583902,	584856,	-9.51546	-9.58606	-9.57929	-9.17994	-9.14835	-9.09608	-9.5732	-9.53676	-9.5562	-9.55685	-9.15089	-9.55633	0.000237381	0.00220282	0.000982584	0.00452679	-0.405959	-0.405443	0.754734	0.755004
b0576	pheP	chr	+	601181,	602558,	-13.4362	-13.5335	-13.3817	-13.2618	-13.233	-13.1086	-13.6655	-13.6994	-13.6468	-13.4517	-13.2233	-13.6687	0.0183356	0.0312248	0.00565782	0.0131815	-0.228383	-0.445414	0.853591	0.734373
b0630	lipB	chr	-	660859,	661501,	-13.8152	-13.7012	-13.7884	-13.507	-13.5998	-13.4074	-14.0127	-14.0847	-13.9027	-13.7687	-13.5385	-13.9929	0.0223641	0.0362796	0.00298684	0.00851004	-0.230196	-0.454384	0.852519	0.729822
b0632	dacA	chr	-	661974,	663186,	-10.7149	-10.74	-10.7334	-10.5631	-10.5887	-10.5551	-11.03	-10.9647	-10.962	-10.7285	-10.5751	-10.9862	0.000351433	0.00274238	0.000651507	0.00346311	-0.15344	-0.411149	0.899104	0.752024
b0636	ybeA	chr	-	667470,	667938,	-14.5501	-14.5406	-14.459	-13.9049	-13.9296	-13.7847	-14.3889	-14.2664	-14.3778	-14.5203	-13.899	-14.3478	0.000632822	0.00387117	0.00147416	0.00549049	-0.621334	-0.448821	0.650069	0.732641
b0637	ybeB	chr	-	667941,	668259,	-13.1869	-13.2802	-13.2106	-12.8731	-12.8207	-12.9289	-13.1387	-13.1634	-13.2086	-13.2242	-12.8537	-13.1705	0.00116757	0.00528631	0.00249099	0.007727	-0.370426	-0.316774	0.773554	0.802863
b0640	holA	chr	-	669796,	670828,	-15.303	-15.3053	-15.286	-14.9163	-14.8195	-14.8325	-15.3827	-15.24	-15.3838	-15.2989	-14.8531	-15.3395	0.00353234	0.0104256	0.00214655	0.00690092	-0.445756	-0.486388	0.734199	0.71381
b0642	leuS	chr	-	671423,	674006,	-9.06596	-9.06885	-9.0455	-8.70029	-8.68674	-8.76718	-9.00682	-9.03034	-9.01997	-9.06103	-8.70295	-9.0184	0.0029644	0.00930092	0.00428016	0.0107249	-0.358072	-0.315449	0.780207	0.803601
b0661	miaB	chr	-	692753,	694178,	-10.7954	-10.8027	-10.7798	-10.5683	-10.5356	-10.62	-10.9811	-11.008	-10.9864	-10.7933	-10.5588	-10.9909	0.00861758	0.0178042	0.00153478	0.00565854	-0.234553	-0.432087	0.849948	0.741189
b0680	glnS	chr	+	705315,	706980,	-10.7791	-10.7952	-10.7462	-9.99778	-9.97783	-10.0217	-10.0774	-10.0398	-10.0625	-10.7749	-9.99093	-10.0609	2.68498e-06	0.000326094	0.0230395	0.0377668	-0.783961	-0.0699887	0.58077	0.952645
b0742	ybgF	chr	+	778820,	779612,	-12.1912	-12.2057	-12.1509	-11.9648	-11.9899	-11.9551	-12.232	-12.2237	-12.2504	-12.1843	-11.9763	-12.236	0.000932965	0.00468622	5.75616e-05	0.000897033	-0.207998	-0.259717	0.865738	0.835252
b0762	ybhT	chr	+	793995,	794145,	-14.0421	-14.0295	-13.9541	-13.4479	-13.5492	-13.3599	-14.0511	-14.0788	-14.2683	-14.0122	-13.4855	-14.1332	0.00301663	0.00941057	0.00177851	0.00624189	-0.526664	-0.647655	0.694158	0.638317
b0766	ybhA	chr	-	796835,	797654,	-12.8796	-12.9843	-12.8493	-12.5128	-12.4765	-12.5009	-12.9986	-13.0045	-12.942	-12.9047	-12.4922	-12.9799	0.00687694	0.0153832	0.00019522	0.0016571	-0.41248	-0.487757	0.751331	0.713133
b0797	rhlE	chr	+	830094,	831459,	-15.1628	-15.2164	-15.0755	-14.507	-14.4802	-14.3775	-15.4074	-15.5784	-15.4327	-15.1546	-14.4733	-15.465	0.000258842	0.00231486	0.00017813	0.001612	-0.681268	-0.991744	0.623617	0.502869
b0807	ybiN	chr	+	841554,	842481,	-14.2015	-14.1586	-14.1616	-13.7038	-13.6959	-13.8164	-14.3465	-14.3002	-14.4578	-14.1757	-13.7158	-14.3709	0.00392977	0.0110336	0.000580903	0.00327881	-0.459839	-0.655102	0.727068	0.635031
b0819	ybiS	chr	-	854046,	854967,	-11.4356	-11.4117	-11.4397	-11.0476	-11.147	-11.0356	-11.9742	-11.8831	-11.9005	-11.4288	-11.0963	-11.9206	0.00709643	0.0156982	6.97849e-05	0.00100545	-0.332436	-0.824254	0.794194	0.564774
b0820	ybiT	chr	+	855185,	856778,	-12.3769	-12.3284	-12.367	-12.0502	-12.072	-12.0795	-12.4791	-12.5017	-12.5126	-12.3578	-12.0658	-12.4976	0.00028027	0.00239577	6.00203e-06	0.000273842	-0.291997	-0.431847	0.816771	0.741312
b0835	yliG	chr	-	875932,	877258,	-12.1966	-12.2198	-12.2763	-11.4548	-11.5203	-11.522	-12.0486	-12.0657	-12.0007	-12.2268	-11.4984	-12.0364	2.36319e-05	0.000742825	5.8983e-05	0.000897033	-0.728445	-0.537988	0.603554	0.688731
b0877	ybjX	chr	-	917350,	918343,	-11.3692	-11.3333	-11.2912	-10.2618	-10.2353	-10.2096	-11.0973	-11.0476	-11.0746	-11.3346	-10.2402	-11.0744	8.64305e-06	0.000676843	2.34149e-06	0.000183138	-1.09431	-0.834191	0.468361	0.560898
b0881	clpS	chr	+	922135,	922456,	-16.0597	-16.1115	-16.066	-15.6082	-15.5096	-15.4256	-16.1361	-16.1884	-16.4327	-16.0785	-15.5287	-16.2511	0.00508772	0.0128365	0.00485337	0.011876	-0.549786	-0.722317	0.683121	0.606123
b0884	infA	chr	-	925447,	925666,	-11.9548	-11.9439	-11.9119	-11.3174	-11.3196	-11.3909	-12.395	-12.414	-12.3091	-11.9388	-11.3292	-12.3693	0.000191242	0.00201356	2.64955e-05	0.000630707	-0.609554	-1.04011	0.655399	0.486289
b0905	ycaO	chr	-	954094,	955855,	-11.247	-11.2102	-11.2529	-10.8927	-10.944	-10.9584	-11.5005	-11.4948	-11.485	-11.2363	-10.9288	-11.4933	0.000478291	0.00325297	0.000769151	0.00386931	-0.307585	-0.564538	0.807993	0.676172
b0907	serC	chr	+	956875,	957964,	-12.109	-12.113	-12.0378	-11.7973	-11.7848	-11.8164	-11.9811	-11.9728	-11.9722	-12.0895	-11.7936	-11.9755	0.00321852	0.00973155	0.00127001	0.00519118	-0.295912	-0.181859	0.814557	0.881567
b0911	rpsA	chr	+	961217,	962891,	-7.34018	-7.41601	-7.3695	-6.09253	-6.0831	-6.18824	-6.55512	-6.52077	-6.53362	-7.37345	-6.10141	-6.53727	2.32173e-05	0.000742825	0.00376314	0.00988162	-1.27203	-0.435862	0.414075	0.739252
b0912	ihfB	chr	+	963050,	963335,	-11.7332	-11.8207	-11.824	-10.9531	-10.9748	-10.7214	-11.4144	-11.4929	-11.4842	-11.7877	-10.9271	-11.4619	0.00373747	0.0107982	0.0129697	0.0245281	-0.860509	-0.53478	0.550758	0.690264
b0915	lpxK	chr	+	967588,	968575,	-14.9802	-14.8927	-14.8101	-14.4786	-14.6338	-14.6936	-15.6507	-15.4667	-15.3838	-14.9007	-14.5885	-15.497	0.024962	0.0397288	0.0010867	0.00475973	-0.312253	-0.90859	0.805383	0.532705
b0918	kdsB	chr	+	970074,	970821,	-12.495	-12.47	-12.4771	-12.1232	-12.0651	-12.1309	-12.8433	-12.9472	-12.9157	-12.4815	-12.094	-12.899	0.00118087	0.00532121	7.56188e-05	0.00107536	-0.387524	-0.805055	0.76444	0.57234
b0922	mukF	chr	+	973541,	974864,	-13.3062	-13.2439	-13.264	-12.9948	-12.894	-12.964	-13.3585	-13.2832	-13.2246	-13.2731	-12.9373	-13.2876	0.00180484	0.00698341	0.00289714	0.00841478	-0.335839	-0.35029	0.792323	0.784427
b0923	mukE	chr	+	974871,	975549,	-13.5984	-13.4525	-13.6539	-13.2498	-13.3135	-13.3253	-13.6544	-13.4822	-13.6218	-13.5633	-13.2936	-13.5902	0.0322091	0.0486469	0.0185704	0.0319185	-0.269744	-0.296553	0.829467	0.814195
b0927	ycbL	chr	+	982872,	983520,	-13.0526	-13.0978	-13.1155	-12.6284	-12.7367	-12.6936	-12.9963	-12.8266	-12.9643	-13.0854	-12.6933	-12.933	0.00110242	0.00515939	0.0236852	0.0385445	-0.392147	-0.239781	0.761995	0.846874
b0930	asnS	chr	-	986807,	988208,	-9.74046	-9.74682	-9.75344	-9.15074	-9.13619	-9.2063	-9.55092	-9.54155	-9.49832	-9.74629	-9.15127	-9.52926	0.00100249	0.00490058	0.000255632	0.00202838	-0.595022	-0.377996	0.662035	0.769506
b0931	pncB	chr	-	988376,	989579,	-13.0351	-13.0812	-13.1118	-12.5792	-12.5521	-12.5702	-13.0222	-12.9879	-13.074	-13.072	-12.5638	-13.0301	0.000661784	0.00393833	0.00135265	0.00527599	-0.50826	-0.466291	0.70307	0.723823
b0948	rlmL	chr	+	1007066,	1009175,	-12.3598	-12.3235	-12.3474	-12.2212	-12.243	-12.2557	-12.6233	-12.5416	-12.4995	-12.3441	-12.2376	-12.5542	0.00214431	0.00772373	0.00902558	0.0185771	-0.10655	-0.316671	0.928807	0.802921
b0954	fabA	chr	-	1015174,	1015693,	-8.6713	-8.68255	-8.6534	-8.21949	-8.21495	-8.21337	-8.8962	-8.93006	-8.93687	-8.66987	-8.21623	-8.92053	0.000199369	0.0020432	0.000244275	0.00195241	-0.453637	-0.704303	0.7302	0.613739
b0955	ycbZ	chr	-	1015761,	1017522,	-13.3819	-13.4313	-13.4085	-12.8955	-12.8771	-12.7886	-13.3112	-13.4939	-13.2463	-13.4058	-12.8697	-13.3385	0.000995254	0.00488701	0.0110794	0.0216475	-0.536099	-0.46878	0.689633	0.722576
b0960	yccS	chr	-	1020952,	1023106,	-14.3631	-14.4052	-14.41	-14.2887	-14.3022	-14.2859	-14.7816	-14.7734	-14.775	-14.3904	-14.2953	-14.7768	0.0139155	0.0256955	4.30476e-06	0.000232895	-0.095126	-0.481564	0.93619	0.716201
b0967	yccW	chr	-	1028001,	1029192,	-12.4896	-12.5153	-12.485	-12.4071	-12.3936	-12.441	-12.9012	-12.9579	-12.9688	-12.4968	-12.405	-12.9417	0.0114947	0.0223962	8.27609e-05	0.0011188	-0.0917294	-0.536623	0.938397	0.689383
b1035	ycdY	chr	+	1098862,	1099417,	-12.7629	-12.7521	-12.7854	-12.2789	-12.1862	-12.3425	-12.7399	-12.5416	-12.6982	-12.7657	-12.2392	-12.6642	0.00624482	0.0144568	0.00811159	0.0171471	-0.526533	-0.425002	0.694221	0.744838
b1047	mdoC	chr	-	1107006,	1108164,	-15.7478	-15.8289	-15.8545	-15.1748	-15.2269	-14.8653	-15.9255	-15.6994	-15.676	-15.8046	-15.1502	-15.7656	0.0175112	0.0300544	0.0104551	0.0208152	-0.654334	-0.615402	0.635369	0.652748
b1054	lpxL	chr	-	1114884,	1115805,	-13.5564	-13.4973	-13.5375	-13.2235	-13.3151	-13.3196	-13.6544	-13.713	-13.6361	-13.5311	-13.2845	-13.6648	0.0056143	0.0135709	0.000899697	0.00432092	-0.246564	-0.380284	0.842902	0.768286
b1055	yceA	chr	+	1116029,	1117082,	-12.5489	-12.6134	-12.5441	-12.1265	-12.1517	-12.1309	-12.837	-12.9233	-12.8771	-12.5686	-12.1401	-12.8763	0.00105386	0.00506131	0.000446515	0.00287608	-0.428483	-0.736159	0.743043	0.600336
b1059	solA	chr	-	1118690,	1119809,	-13.4855	-13.5307	-13.4905	-13.1657	-13.2814	-13.205	-13.5172	-13.5096	-13.461	-13.5018	-13.2304	-13.4947	0.00656101	0.0150358	0.00533444	0.0125348	-0.271417	-0.264328	0.828505	0.832587
b1062	pyrC	chr	-	1120783,	1121830,	-11.3916	-11.4094	-11.404	-11.2042	-11.1262	-11.1421	-11.8433	-11.8577	-11.8436	-11.4011	-11.1542	-11.8476	0.00713419	0.0157499	0.000806907	0.00398001	-0.246884	-0.693472	0.842714	0.618364
b1086	rluC	chr	+	1144162,	1145122,	-13.2554	-13.2555	-13.2054	-12.7938	-12.8831	-12.8571	-13.4199	-13.4822	-13.556	-13.2409	-12.8488	-13.4855	0.000597519	0.00375031	0.000377362	0.00263192	-0.392087	-0.636681	0.762026	0.643191
b1088	yceD	chr	+	1146016,	1146538,	-12.0853	-12.1252	-12.0965	-11.5449	-11.534	-11.6412	-12.045	-12.2172	-11.9949	-12.1017	-11.5531	-12.0751	0.0017913	0.00697929	0.0068029	0.0151099	-0.548612	-0.522009	0.683678	0.696401
b1094	acpP	chr	+	1150837,	1151074,	-8.42969	-8.50625	-8.47602	-8.23028	-8.19062	-8.22314	-8.28328	-8.25729	-8.27207	-8.46806	-8.20857	-8.27159	0.00179741	0.00697929	0.0243955	0.0393418	-0.259481	-0.0630142	0.835388	0.957262
b1100	ycfH	chr	+	1155999,	1156797,	-13.6113	-13.6838	-13.6291	-13.141	-13.1685	-13.3716	-13.8433	-13.6376	-13.6541	-13.6402	-13.1875	-13.7123	0.0220153	0.0359803	0.00803941	0.0170274	-0.452747	-0.524871	0.730651	0.695021
b1109	ndh	chr	+	1165307,	1166612,	-11.0261	-11.064	-10.9987	-10.5346	-10.5036	-10.6617	-11.8969	-11.8514	-11.9756	-11.0307	-10.5364	-11.9105	0.00513055	0.0128852	4.43885e-05	0.000775286	-0.494209	-1.3741	0.709951	0.385794
b1125	potB	chr	-	1182839,	1183667,	-13.5352	-13.6854	-13.5474	-13.245	-13.1152	-13.1334	-13.8518	-13.9233	-14.091	-13.587	-13.16	-13.9543	0.00278477	0.00894229	0.00182198	0.00627378	-0.42703	-0.794293	0.743792	0.576626
b1126	potA	chr	-	1183680,	1184817,	-12.9769	-13.0295	-12.9563	-12.1851	-12.1634	-12.1209	-12.9662	-12.9312	-13.0499	-12.9882	-12.1642	-12.9848	1.03196e-05	0.000676843	0.000218346	0.00181128	-0.823995	-0.82061	0.564876	0.566203
b1131	purB	chr	-	1189838,	1191209,	-10.4303	-10.5139	-10.4231	-9.5612	-9.52633	-9.64516	-10.3461	-10.3192	-10.3206	-10.4555	-9.55506	-10.329	5.62561e-05	0.00108071	0.00131078	0.00525752	-0.90039	-0.773985	0.535742	0.5848
b1133	mnmA	chr	-	1191889,	1192996,	-11.9315	-11.9887	-11.9056	-11.6584	-11.5825	-11.5787	-12.1582	-12.0921	-12.0898	-11.9427	-11.6069	-12.114	0.000728608	0.00413789	0.000139769	0.0014041	-0.335825	-0.507146	0.792331	0.703613
b1187	fadR	chr	+	1234160,	1234880,	-13.4759	-13.5321	-13.3612	-13.0232	-12.9919	-13.0747	-13.1859	-13.2367	-13.1359	-13.4601	-13.0144	-13.1825	0.00539859	0.0132302	0.0154997	0.0275523	-0.445765	-0.168164	0.734195	0.889975
b1203	ychF	chr	-	1255943,	1257035,	-10.3142	-10.3355	-10.3501	-10.1235	-10.095	-10.0735	-10.5516	-10.6242	-10.6496	-10.3315	-10.1012	-10.6072	0.000334394	0.00269236	0.000663143	0.00350793	-0.230276	-0.505995	0.852472	0.704175
b1204	pth	chr	-	1257151,	1257736,	-13.2977	-13.3859	-13.3069	-12.9511	-12.9572	-12.8989	-13.7536	-13.6333	-13.6982	-13.3291	-12.9464	-13.6976	0.000646944	0.00390512	0.000275356	0.00212335	-0.382756	-0.751251	0.766971	0.594088
b1207	prs	chr	-	1260150,	1261098,	-9.07873	-9.05903	-9.04367	-8.67273	-8.71185	-8.7879	-9.38446	-9.35245	-9.37725	-9.06206	-8.7096	-9.37239	0.00619546	0.0144007	0.0014265	0.00540489	-0.35246	-0.662788	0.783247	0.631656
b1209	lolB	chr	-	1262099,	1262723,	-14.0281	-13.9294	-13.9194	-13.4479	-13.3184	-13.2476	-14.0127	-13.7359	-13.907	-13.9633	-13.3493	-13.8891	0.0020231	0.00749091	0.00696156	0.0152764	-0.613945	-0.539822	0.653407	0.687856
b1211	prfA	chr	+	1264234,	1265317,	-13.0544	-13.0405	-13.1118	-12.862	-12.8904	-12.8245	-13.0584	-13.0788	-13.1108	-13.0659	-12.8709	-13.0829	0.00206391	0.00750049	0.000983725	0.00452679	-0.194982	-0.211952	0.873584	0.863369
b1214	ychA	chr	+	1266542,	1267352,	-14.5377	-14.7381	-14.6557	-14.3493	-14.358	-14.4379	-14.7897	-14.9339	-14.6834	-14.6357	-14.3666	-14.7909	0.0289681	0.0448024	0.0179801	0.0310681	-0.269012	-0.424282	0.829888	0.745209
b1232	purU	chr	-	1287004,	1287847,	-13.1168	-13.1413	-13.0506	-12.4125	-12.4893	-12.3746	-13.0246	-13.0527	-13.2139	-13.1055	-12.4459	-13.0977	0.000131707	0.00171084	0.00170842	0.0061465	-0.659648	-0.651818	0.633033	0.636478
b1237	hns	chr	-	1291731,	1292145,	-9.09679	-9.12676	-9.11791	-8.46621	-8.4771	-8.34412	-8.69162	-8.72356	-8.71186	-9.11275	-8.45297	-8.70818	0.00280094	0.0089547	0.0185972	0.0319185	-0.659778	-0.255207	0.632976	0.837867
b1238	tdk	chr	+	1292749,	1293367,	-12.9802	-12.9728	-12.9652	-12.7137	-12.7575	-12.6826	-13.2598	-13.3071	-13.2219	-12.9734	-12.7315	-13.2599	0.00562927	0.0135709	8.60339e-05	0.00112767	-0.241978	-0.528411	0.845585	0.693318
b1244	oppB	chr	+	1300922,	1301843,	-12.0984	-12.1348	-12.113	-11.9797	-11.9179	-11.9354	-12.3858	-12.3037	-12.3307	-12.1146	-11.9409	-12.3416	0.00317458	0.0096829	0.000299755	0.00221138	-0.173774	-0.400713	0.88652	0.757484
b1253	yciA	chr	-	1309871,	1310270,	-14.2575	-14.2096	-14.2238	-13.5478	-13.5684	-13.4945	-13.9211	-13.892	-13.9288	-14.2318	-13.5504	-13.9152	4.50347e-05	0.000930434	0.00065009	0.00346311	-0.681403	-0.364813	0.623559	0.776569
b1279	yciS	chr	+	1338266,	1338575,	-14.947	-15.0018	-15.0056	-14.8132	-14.8904	-14.8005	-15.1886	-15.3209	-15.3718	-14.9817	-14.8507	-15.2906	0.0152688	0.0273191	0.00502603	0.0121173	-0.131068	-0.439917	0.913155	0.737177
b1281	pyrF	chr	+	1339944,	1340682,	-11.9565	-11.9224	-11.9696	-11.5135	-11.5036	-11.5286	-12.2333	-12.1556	-12.2518	-11.9488	-11.5106	-12.2164	0.000106904	0.0015134	0.00104222	0.00462038	-0.438196	-0.705807	0.738057	0.613099
b1286	rnb	chr	-	1345001,	1346936,	-10.9127	-10.9009	-10.8743	-10.5773	-10.5401	-10.5009	-10.9525	-10.9459	-10.9331	-10.8977	-10.5465	-10.9436	0.000745383	0.00414312	0.00177346	0.00624189	-0.351155	-0.397111	0.783956	0.759377
b1288	fabI	chr	-	1348274,	1349063,	-8.95357	-8.95732	-8.93398	-8.74038	-8.74992	-8.765	-8.93125	-8.94485	-8.95559	-8.94917	-8.74895	-8.94388	4.25919e-05	0.000914474	4.42099e-05	0.000775286	-0.200224	-0.194934	0.870415	0.873613
b1294	sapA	chr	-	1353490,	1355134,	-13.9836	-13.9766	-14.0636	-13.7609	-13.7302	-13.7537	-14.1207	-13.9715	-14.0099	-14.0037	-13.7438	-14.0359	0.00657453	0.0150358	0.0200461	0.0337182	-0.259863	-0.292084	0.835167	0.816721
b1344	ttcA	chr	-	1409036,	1409972,	-12.149	-12.076	-12.1204	-11.8983	-11.8569	-11.9203	-12.0967	-12.1356	-12.194	-12.1162	-11.8799	-12.1422	0.00148287	0.00608142	0.00309318	0.00870701	-0.236312	-0.262292	0.848913	0.833762
b1380	ldhA	chr	-	1439877,	1440867,	-12.3604	-12.3613	-12.3481	-12.0253	-12.0247	-12.0891	-12.4058	-12.414	-12.4436	-12.3571	-12.0343	-12.4216	0.00357943	0.010508	0.000521455	0.00315697	-0.322852	-0.387302	0.799488	0.764558
b1435	ydcP	chr	+	1504804,	1506766,	-13.278	-13.2802	-13.1937	-12.5898	-12.6906	-12.8245	-13.3199	-13.4783	-13.5159	-13.254	-12.6748	-13.4337	0.00727684	0.0160325	0.00133282	0.00526874	-0.579235	-0.758912	0.669319	0.590942
b1524	yneH	chr	-	1610348,	1611275,	-14.8985	-14.8927	-14.6379	-14.2498	-14.1818	-14.2971	-14.7031	-14.7359	-14.6541	-14.8171	-14.2209	-14.695	0.0130562	0.0245927	0.000646258	0.00346311	-0.596175	-0.474058	0.661505	0.719937
b1528	ydeA	chr	+	1615051,	1616242,	-15.9503	-16.1199	-16.1142	-15.2118	-15.0381	-15.5009	-16.243	-16.24	-16.2463	-16.0514	-15.1562	-16.2433	0.0156994	0.0277719	0.0179745	0.0310681	-0.895117	-1.08704	0.537704	0.470726
b1540	ydfH	chr	+	1626375,	1627062,	-15.2292	-15.5069	-15.1591	-14.4673	-14.4406	-14.5804	-15.0955	-14.966	-15.1308	-15.2941	-14.4695	-15.0682	0.00901842	0.0184583	0.00110705	0.00481038	-0.824544	-0.598659	0.564661	0.660368
b1584	speG	chr	+	1654207,	1654768,	-12.7528	-12.8082	-12.6602	-12.4493	-12.4612	-12.4691	-12.7957	-12.8094	-12.7988	-12.7435	-12.4584	-12.8009	0.0213263	0.0350635	3.08937e-06	0.000211429	-0.285142	-0.342521	0.820661	0.788662
b1605	ydgI	chr	+	1677580,	1678963,	-15.2212	-15.163	-15.2424	-14.7781	-14.8616	-14.9332	-15.7897	-15.629	-15.5903	-15.2076	-14.8434	-15.6687	0.00590737	0.0139852	0.000667008	0.00351141	-0.364177	-0.825321	0.776912	0.564357
b1608	rstA	chr	+	1680182,	1680902,	-14.3157	-14.3469	-14.4466	-13.8936	-13.8357	-13.8488	-14.1413	-14.24	-14.2192	-14.3626	-13.8568	-14.1975	0.00192111	0.00735532	0.00167162	0.00608116	-0.505784	-0.340703	0.704277	0.789657
b1627	rsxA	chr	+	1703790,	1704372,	-14.8272	-14.8428	-14.744	-14.3036	-14.3681	-14.2971	-14.9708	-15.1634	-15.1512	-14.808	-14.3356	-15.089	0.000363182	0.00276541	0.00294624	0.00847881	-0.472361	-0.753344	0.720784	0.593227
b1633	nth	chr	+	1709546,	1710182,	-14.9177	-14.9036	-14.8793	-14.7507	-14.6419	-14.6644	-15.2101	-15.3631	-15.6042	-14.9019	-14.6807	-15.3858	0.0152643	0.0273191	0.0188621	0.0322719	-0.221169	-0.705091	0.85787	0.613404
b1636	pdxY	chr	-	1713049,	1713913,	-12.583	-12.5578	-12.5565	-12.4729	-12.472	-12.5171	-12.8391	-12.829	-12.7554	-12.5669	-12.4789	-12.8059	0.0171323	0.0296364	0.00143589	0.00542174	-0.0880182	-0.326954	0.940814	0.797218
b1637	tyrS	chr	-	1713971,	1715246,	-11.0085	-11.0312	-10.9591	-10.4434	-10.4594	-10.365	-10.8003	-10.7997	-10.8236	-11.0016	-10.4397	-10.8084	0.000161146	0.00193907	0.00355638	0.00952136	-0.561916	-0.36871	0.677402	0.774475
b1652	rnt	chr	+	1726370,	1727018,	-14.8578	-14.7059	-14.6664	-14.0649	-13.9984	-14.2422	-14.9616	-14.8514	-14.8231	-14.75	-14.0545	-14.8786	0.00276589	0.00893406	0.00203221	0.00667769	-0.695534	-0.82406	0.617481	0.56485
b1654	grxD	chr	-	1731777,	1732125,	-10.7316	-10.763	-10.7336	-10.2384	-10.378	-10.1579	-10.5916	-10.6339	-10.6183	-10.7425	-10.2961	-10.6135	0.0153312	0.0273861	0.0274309	0.0430327	-0.446463	-0.317374	0.73384	0.802529
b1658	purR	chr	+	1735867,	1736893,	-12.1233	-12.0475	-12.0851	-11.6736	-11.7097	-11.8325	-12.1271	-12.0906	-12.0321	-12.0868	-11.715	-12.082	0.00894264	0.0183374	0.00698516	0.0152783	-0.371785	-0.367005	0.772826	0.77539
b1661	cfa	chr	+	1739436,	1740585,	-12.9437	-12.935	-13.0413	-12.7781	-12.6959	-12.7121	-13.2402	-13.1205	-13.1874	-12.968	-12.7253	-13.1853	0.00573772	0.0137479	0.000715358	0.00371275	-0.242726	-0.460028	0.845147	0.726972
b1676	pykF	chr	+	1753721,	1755134,	-8.43234	-8.42397	-8.41936	-7.89731	-7.92551	-7.95927	-8.40847	-8.4406	-8.446	-8.42583	-7.92096	-8.43119	0.000842305	0.00443425	6.23771e-05	0.000923013	-0.504875	-0.510239	0.704722	0.702106
b1704	aroH	chr	+	1786458,	1787505,	-14.4962	-14.5722	-14.5928	-13.9472	-13.988	-13.9074	-14.3112	-14.1571	-14.1822	-14.5485	-13.9621	-14.2183	0.000120244	0.0016057	0.0160591	0.0283625	-0.58645	-0.2562	0.66598	0.837291
b1714	pheS	chr	-	1795982,	1796966,	-10.5246	-10.5839	-10.5424	-9.79404	-9.80261	-9.95128	-10.4062	-10.4219	-10.3767	-10.5492	-9.82083	-10.4002	0.00247735	0.00839844	0.00574575	0.0133015	-0.728371	-0.579399	0.603585	0.669243
b1717	rpmI	chr	-	1797825,	1798023,	-8.37154	-8.36373	-8.36841	-8.29169	-8.27412	-8.27228	-8.52824	-8.53036	-8.50975	-8.36804	-8.27969	-8.52226	0.00203989	0.00750049	1.14511e-05	0.000432379	-0.08835	-0.24257	0.940598	0.845238
b1718	infC	chr	-	1798119,	1798662,	-10.8776	-10.9659	-10.9016	-9.9073	-9.84304	-9.9365	-10.7224	-10.7348	-10.7318	-10.9133	-9.87789	-10.7294	1.19006e-05	0.000676843	0.000910796	0.00435512	-1.03545	-0.851479	0.487864	0.554216
b1719	thrS	chr	-	1798665,	1800594,	-9.58256	-9.61698	-9.60859	-9.24376	-9.25515	-9.2185	-9.52708	-9.52648	-9.55642	-9.60138	-9.24585	-9.53726	1.74235e-05	0.000691055	3.71152e-05	0.000775286	-0.355537	-0.291418	0.781579	0.817099
b1722	ydiY	chr	-	1803348,	1804107,	-14.3964	-14.4822	-14.4252	-13.8383	-13.9001	-14.0322	-14.5105	-14.5056	-14.6254	-14.4327	-13.8977	-14.5488	0.00523376	0.0129954	0.00146318	0.00548692	-0.534967	-0.651089	0.690175	0.6368
b1749	xthA	chr	+	1830451,	1831258,	-12.1777	-12.0668	-12.134	-11.5427	-11.5573	-11.4817	-11.8784	-11.9783	-11.893	-12.1275	-11.541	-11.9125	0.000209326	0.00208374	0.00082124	0.00403255	-0.586542	-0.371483	0.665937	0.772988
b1767	ansA	chr	+	1848883,	1849900,	-12.9001	-12.8649	-12.8992	-12.4152	-12.3884	-12.2915	-12.8752	-12.8818	-12.9778	-12.888	-12.3824	-12.9129	0.00274855	0.00890432	0.000435601	0.00287339	-0.505624	-0.530443	0.704356	0.692342
b1780	yeaD	chr	+	1861873,	1862758,	-11.1152	-11.1202	-11.1349	-10.7363	-10.7859	-10.8204	-11.0004	-11.0355	-11.0327	-11.1225	-10.7741	-11.0221	0.00339702	0.0101355	0.00371317	0.00982106	-0.348332	-0.247993	0.785492	0.842067
b1822	rrmA	chr	-	1904274,	1905084,	-14.2493	-14.1284	-14.1924	-13.6777	-13.7388	-13.7769	-14.7108	-14.5215	-14.5833	-14.1919	-13.7236	-14.6075	0.00063651	0.00387211	0.000797864	0.00395322	-0.468276	-0.883898	0.722828	0.541901
b1827	kdgR	chr	-	1907331,	1908123,	-13.0857	-13.0884	-13.0273	-12.6331	-12.7204	-12.8084	-13.3675	-13.198	-13.1666	-13.0696	-12.7031	-13.2433	0.0118102	0.0228483	0.00331315	0.00906976	-0.366521	-0.54016	0.775651	0.687694
b1830	prc	chr	-	1910791,	1912840,	-11.9229	-11.8671	-11.872	-11.6221	-11.7172	-11.6536	-12.0163	-12.0326	-12.0099	-11.8895	-11.6753	-12.0188	0.00448023	0.0121432	0.00422842	0.010644	-0.214191	-0.343474	0.862029	0.788141
b1831	proQ	chr	-	1912859,	1913558,	-11.2438	-11.2221	-11.2047	-10.6838	-10.7274	-10.8275	-11.0109	-11.0129	-11.0134	-11.2253	-10.727	-11.0124	0.00520927	0.0129954	0.0245729	0.0395696	-0.498316	-0.285428	0.707933	0.820498
b1832	yebR	chr	-	1913654,	1914206,	-13.2957	-13.195	-13.2424	-12.7695	-12.8311	-12.6253	-13.2486	-13.4326	-13.1953	-13.2463	-12.7782	-13.2806	0.0058878	0.0139852	0.00465858	0.011515	-0.468119	-0.50241	0.722907	0.705927
b1835	rsmF	chr	+	1918246,	1919686,	-14.3544	-14.3494	-14.2971	-13.8204	-13.7697	-13.5736	-14.2486	-14.214	-14.1208	-14.3361	-13.7552	-14.1919	0.0112079	0.0219939	0.01156	0.0223248	-0.580886	-0.436652	0.668553	0.738847
b1847	yebF	chr	-	1928057,	1928414,	-14.8516	-14.8963	-14.8101	-14.6584	-14.6257	-14.5534	-15.221	-15.0671	-15.2907	-14.8542	-14.6255	-15.1975	0.00439262	0.0120549	0.00502664	0.0121173	-0.228683	-0.571983	0.853414	0.672692
b1860	ruvB	chr	-	1942369,	1943380,	-14.1743	-14.1051	-14.149	-13.8456	-13.8474	-13.916	-14.1005	-14.0847	-14.1614	-14.1438	-13.8568	-14.1171	0.000961961	0.00476628	0.00171765	0.0061465	-0.286975	-0.260329	0.819619	0.834897
b1870	cmoA	chr	+	1950725,	1951469,	-13.7449	-13.6589	-13.6256	-13.3238	-13.2862	-13.3541	-13.8101	-13.8022	-13.665	-13.6813	-13.3086	-13.7545	0.00270439	0.00887554	0.00508816	0.0121649	-0.372677	-0.445955	0.772348	0.734098
b1876	argS	chr	+	1958085,	1959819,	-10.814	-10.8076	-10.7367	-10.1589	-10.1757	-10.1758	-10.7866	-10.7913	-10.7337	-10.7893	-10.1701	-10.7689	0.00101633	0.00492607	0.000380176	0.00263476	-0.619284	-0.598894	0.650994	0.66026
b1913	uvrC	chr	-	1990897,	1992730,	-14.7194	-14.7252	-14.714	-14.3858	-14.283	-14.3658	-14.9255	-14.8022	-14.8728	-14.7198	-14.3288	-14.8696	0.00653301	0.0150287	0.000428336	0.00284259	-0.390968	-0.540747	0.762618	0.687415
b1967	hchA	chr	+	2033858,	2034710,	-13.4677	-13.4713	-13.4953	-13.2667	-13.1729	-13.1739	-13.5477	-13.5456	-13.5972	-13.4768	-13.2037	-13.5645	0.00868935	0.0179187	0.00181381	0.00627378	-0.273053	-0.360785	0.827567	0.778741
b2040	rfbD	chr	-	2109100,	2110000,	-11.3432	-11.3123	-11.3111	-11.1155	-11.1373	-11.0723	-11.5623	-11.5857	-11.579	-11.3236	-11.1202	-11.5751	0.00192972	0.0073558	0.000541332	0.0032041	-0.203464	-0.454944	0.868463	0.729538
b2041	rfbB	chr	-	2109999,	2111085,	-10.5265	-10.544	-10.5741	-10.2869	-10.337	-10.2228	-10.8162	-10.8303	-10.8175	-10.5458	-10.3027	-10.8208	0.00731224	0.0160459	0.00325523	0.00895738	-0.24308	-0.518077	0.84494	0.698302
b2042	galF	chr	-	2111457,	2112351,	-11.1345	-11.1306	-11.1651	-10.7934	-10.7575	-10.8084	-10.9823	-10.9845	-11.0274	-11.1419	-10.7769	-10.9988	8.6925e-05	0.00130388	0.00055565	0.00321924	-0.364978	-0.221938	0.776481	0.857413
b2066	udk	chr	-	2140330,	2140972,	-12.9963	-13.1146	-13.0033	-11.9336	-11.916	-12.0988	-12.8433	-12.7592	-12.6908	-13.0366	-11.9477	-12.7629	0.000276898	0.00239577	0.000622833	0.00343505	-1.08895	-0.815166	0.470105	0.568343
b2113	mrp	chr	-	2191080,	2192190,	-11.081	-11.1665	-11.0633	-10.7249	-10.7427	-10.8134	-10.9576	-11.027	-10.9178	-11.1037	-10.747	-10.9633	0.00134045	0.00579677	0.00828087	0.0174041	-0.356732	-0.216302	0.780932	0.860769
b2114	metG	chr	+	2192321,	2194355,	-10.1923	-10.1925	-10.2281	-9.95599	-9.95788	-9.97624	-10.2785	-10.2811	-10.2538	-10.2026	-9.95996	-10.2704	0.000325673	0.00264157	1.83898e-05	0.00052489	-0.242595	-0.310487	0.845224	0.806369
b2133	dld	chr	+	2220206,	2221922,	-12.956	-12.9434	-12.9774	-12.7991	-12.7797	-12.8005	-12.9056	-12.9128	-12.9244	-12.9579	-12.7892	-12.9144	0.000344072	0.0027105	0.000192153	0.0016571	-0.168647	-0.125146	0.889677	0.916911
b2153	folE	chr	-	2241005,	2241674,	-12.6178	-12.7051	-12.6117	-12.1623	-12.1095	-12.1334	-12.6397	-12.771	-12.592	-12.6445	-12.1305	-12.6596	0.000681086	0.00403129	0.00646726	0.0145414	-0.514008	-0.529117	0.700274	0.692979
b2171	yeiP	chr	+	2263471,	2264044,	-11.5617	-11.556	-11.5017	-10.9757	-10.9987	-10.9021	-11.3406	-11.3911	-11.3013	-11.5424	-10.9763	-11.3411	0.000202098	0.00204905	0.000630215	0.00345043	-0.566069	-0.364741	0.675455	0.776608
b2183	rsuA	chr	-	2277809,	2278505,	-13.1801	-13.204	-13.2627	-12.7592	-12.7443	-12.7422	-13.0535	-13.1727	-13.1537	-13.2113	-12.7489	-13.1233	0.00188248	0.00723268	0.00837887	0.0175093	-0.462366	-0.374394	0.725795	0.771429
b2185	rplY	chr	+	2280538,	2280823,	-9.02826	-9.0727	-9.01863	-8.71432	-8.71379	-8.7079	-9.30249	-9.31182	-9.32672	-9.04009	-8.71309	-9.31382	0.00226478	0.00799979	4.27331e-05	0.000775286	-0.326999	-0.600726	0.797193	0.659422
b2187	yejL	chr	+	2282150,	2282378,	-13.7694	-13.864	-13.816	-13.4342	-13.3697	-13.4195	-14.0805	-14.1821	-14.1359	-13.8137	-13.3983	-14.1296	0.000455826	0.00321709	9.36497e-05	0.00112767	-0.415321	-0.73125	0.749852	0.602382
b2290	yfbQ	chr	+	2405582,	2406800,	-13.9453	-14.0435	-13.9987	-13.6777	-13.7151	-13.6572	-14.0756	-14.1634	-14.2032	-13.9927	-13.6938	-14.1458	0.00175509	0.00691302	0.00214905	0.00690092	-0.298879	-0.452015	0.812884	0.731021
b2296	ackA	chr	+	2411491,	2412694,	-10.1159	-10.0676	-10.1155	-9.92087	-9.90511	-9.90527	-10.8533	-10.8577	-10.893	-10.0995	-9.91038	-10.8686	0.003814	0.0109043	1.91741e-05	0.00052489	-0.189132	-0.95824	0.877133	0.514684
b2312	purF	chr	-	2426742,	2428260,	-12.1614	-12.2142	-12.1995	-11.9867	-12.072	-11.964	-12.409	-12.4382	-12.4157	-12.1897	-12.0267	-12.42	0.0166297	0.0289499	0.0039799	0.0102783	-0.162969	-0.393248	0.893185	0.761413
b2316	accD	chr	-	2431033,	2431948,	-10.2655	-10.2759	-10.269	-10.0777	-10.1076	-10.0867	-10.2206	-10.2237	-10.2092	-10.27	-10.0944	-10.2175	0.000949843	0.00474922	0.0011383	0.00490723	-0.17552	-0.123028	0.885448	0.918258
b2318	truA	chr	-	2432845,	2433658,	-14.6999	-14.7316	-14.6809	-14.2789	-14.2515	-14.3894	-14.8645	-14.8022	-14.7438	-14.7049	-14.2804	-14.8023	0.00602484	0.0142181	0.000954722	0.00450331	-0.424473	-0.521897	0.745111	0.696455
b2350	yfdG	chr	+	2465876,	2466239,	-15.004	-14.9633	-14.7903	-14.6082	-14.4765	-14.4256	-15.6804	-15.3775	-15.6325	-14.9264	-14.5113	-15.5681	0.00885363	0.018189	0.0017263	0.00615732	-0.415087	-1.05682	0.749974	0.48069
b2400	gltX	chr	-	2517278,	2518694,	-9.54632	-9.55248	-9.55661	-9.35834	-9.36039	-9.42334	-9.66037	-9.6561	-9.66979	-9.55131	-9.36887	-9.66245	0.0138371	0.025608	0.0044955	0.0111877	-0.182434	-0.293575	0.881215	0.815878
b2413	cysZ	chr	+	2529484,	2530246,	-13.4099	-13.5042	-13.5309	-13.0713	-13.1612	-13.0891	-14.1258	-14.3489	-14.3659	-13.4749	-13.1198	-14.2727	0.0016836	0.00672826	0.00185283	0.00628715	-0.355135	-1.15286	0.781797	0.449734
b2436	hemF	chr	+	2551246,	2552146,	-15.6009	-15.5635	-15.4435	-15.1566	-15.264	-15.331	-16.1569	-15.9769	-15.7515	-15.5419	-15.2368	-15.9496	0.0149176	0.0268708	0.0147026	0.0265666	-0.305152	-0.712794	0.809357	0.610137
b2476	purC	chr	-	2594926,	2595640,	-12.1035	-12.0931	-12.0589	-11.1243	-11.0934	-11.2195	-11.7031	-11.6748	-11.6396	-12.0871	-11.1218	-11.672	0.000548581	0.00353351	0.00132609	0.00526113	-0.965295	-0.550127	0.512174	0.68296
b2499	purM	chr	+	2619218,	2620256,	-12.0421	-12.076	-12.0372	-11.4085	-11.4911	-11.5501	-11.7272	-11.801	-11.7642	-12.0519	-11.4714	-11.7618	0.0029005	0.00920592	0.00894189	0.0184395	-0.580454	-0.290399	0.668753	0.817676
b2500	purN	chr	+	2620255,	2620894,	-14.4397	-14.5463	-14.5162	-14.0777	-14.001	-14.0988	-14.7576	-14.7925	-14.9331	-14.4963	-14.0405	-14.8282	0.000541543	0.0035297	0.0008995	0.00432092	-0.455779	-0.787712	0.729117	0.579262
b2507	guaA	chr	-	2628979,	2630557,	-8.05463	-8.05894	-8.03999	-7.64727	-7.62928	-7.72461	-8.66048	-8.68204	-8.67186	-8.05185	-7.64908	-8.67086	0.0044629	0.0121403	0.000529947	0.00315697	-0.402766	-1.02178	0.756407	0.492508
b2508	guaB	chr	-	2630625,	2632092,	-7.92512	-7.91849	-7.87562	-7.3322	-7.34746	-7.4163	-8.20064	-8.20255	-8.18963	-7.90858	-7.35232	-8.19728	0.00022101	0.00214605	0.000753859	0.00385736	-0.556255	-0.844953	0.680065	0.556729
b2514	hisS	chr	-	2637322,	2638597,	-10.7805	-10.7832	-10.7384	-10.5717	-10.5764	-10.6122	-10.8049	-10.7586	-10.818	-10.7692	-10.5801	-10.7957	0.000791459	0.00429033	0.00116417	0.0049397	-0.189113	-0.215619	0.877145	0.861177
b2517	yfgB	chr	-	2641150,	2642305,	-11.9458	-11.9355	-11.947	-11.7229	-11.6389	-11.7769	-11.9939	-11.981	-12.0181	-11.9427	-11.6864	-11.9986	0.028332	0.0439427	0.0143235	0.0260659	-0.256235	-0.312181	0.83727	0.805423
b2527	hscB	chr	-	2656973,	2657489,	-13.8827	-14.0678	-14.0308	-13.5186	-13.5743	-13.5401	-14.484	-14.4515	-14.4203	-13.9843	-13.5504	-14.4515	0.0107155	0.0212115	3.71511e-06	0.000226002	-0.433957	-0.901175	0.740229	0.53545
b2533	suhB	chr	+	2661463,	2662267,	-10.4928	-10.4985	-10.478	-10.1329	-10.1405	-10.2537	-11.6534	-11.6226	-11.6236	-10.4904	-10.1542	-11.6337	0.0134648	0.0252033	0.000352999	0.00247778	-0.336254	-1.47947	0.792095	0.35862
b2557	purL	chr	-	2689677,	2693565,	-10.8872	-10.8376	-10.8422	-10.5698	-10.5487	-10.5889	-10.9904	-10.9907	-11.0589	-10.8576	-10.5617	-11.0145	0.000221464	0.00214605	0.000438723	0.00287608	-0.295982	-0.452815	0.814517	0.730616
b2559	tadA	chr	-	2695375,	2695879,	-15.9177	-16.1199	-16.0565	-15.5597	-15.5938	-15.331	-16.484	-16.6638	-16.2683	-16.0221	-15.5405	-16.4515	0.00803125	0.0169773	0.00320121	0.00888462	-0.481563	-0.911037	0.716201	0.531803
b2560	yfhB	chr	-	2695936,	2696572,	-14.8953	-14.8819	-14.818	-14.6457	-14.6338	-14.594	-15.0366	-14.9552	-15.1208	-14.8683	-14.6318	-15.041	0.00201692	0.00749091	0.00797134	0.0169159	-0.236571	-0.40921	0.84876	0.753035
b2567	rnc	chr	-	2701404,	2702085,	-12.2998	-12.2766	-12.2716	-12.0356	-11.9655	-12.0532	-12.6861	-12.5275	-12.5937	-12.284	-12.0015	-12.605	0.00585351	0.0139643	0.00117072	0.0049397	-0.282509	-0.603566	0.82216	0.658125
b2573	rpoE	chr	-	2707458,	2708034,	-14.3349	-14.2743	-14.2777	-14.0191	-14.0488	-14.0045	-14.221	-14.24	-14.146	-14.2981	-14.0322	-14.1994	0.000687686	0.00404847	0.0132249	0.0248392	-0.265849	-0.16714	0.831709	0.890606
b2594	rluD	chr	-	2733052,	2734033,	-12.7272	-12.7155	-12.6117	-12.4301	-12.4478	-12.5368	-12.9731	-12.8143	-12.9048	-12.6894	-12.4546	-12.9006	0.0127484	0.0241748	0.00243828	0.0076066	-0.234705	-0.445918	0.849859	0.734117
b2610	ffh	chr	-	2744455,	2745817,	-11.233	-11.2734	-11.2188	-10.857	-10.9007	-10.9311	-11.2881	-11.2934	-11.2788	-11.2422	-10.8904	-11.2863	0.000321819	0.00264157	0.00221295	0.00704727	-0.351823	-0.395981	0.783593	0.759973
b2620	smpB	chr	+	2752917,	2753400,	-12.9025	-12.9911	-13.0553	-12.5807	-12.5454	-12.7346	-12.9731	-12.8192	-12.8728	-12.9744	-12.5839	-12.8907	0.0091378	0.0185814	0.0242164	0.0391683	-0.3905	-0.306773	0.762865	0.808448
b2672	ygaM	chr	+	2798155,	2798497,	-15.4819	-15.474	-15.5657	-14.9867	-15.1847	-15.0988	-15.4452	-15.4667	-15.4327	-15.5027	-15.103	-15.4471	0.00761811	0.0163887	0.0220135	0.0364671	-0.399716	-0.344029	0.758007	0.787838
b2677	proV	chr	+	2802836,	2804039,	-12.019	-12.0255	-12.0176	-11.4583	-11.4825	-11.3512	-11.808	-11.8352	-11.8436	-12.0207	-11.4542	-11.8286	0.00452196	0.0121959	0.00691966	0.0152149	-0.566551	-0.374427	0.675229	0.771412
b2685	emrA	chr	+	2809448,	2810621,	-13.1021	-13.1083	-13.1377	-12.5027	-12.6532	-12.6148	-13.0151	-12.9715	-13.0619	-13.1143	-12.5956	-13.0184	0.00510176	0.0128424	0.00300069	0.00851233	-0.518703	-0.422821	0.697999	0.745965
b2748	ftsB	chr	-	2870530,	2870842,	-15.9372	-16.0617	-16.0755	-15.5838	-15.5549	-15.6644	-16.2654	-16.0906	-16.0812	-16.0168	-15.5803	-16.1458	0.002072	0.00750049	0.00364715	0.00971687	-0.436442	-0.565473	0.738955	0.675734
b2780	pyrG	chr	-	2906050,	2907688,	-9.19271	-9.23282	-9.2134	-9.16967	-9.15661	-9.15568	-9.75685	-9.75777	-9.76567	-9.21188	-9.16082	-9.76025	0.032449	0.0488744	4.24891e-07	7.75425e-05	-0.0510587	-0.599433	0.965228	0.660014
b2781	mazG	chr	-	2907915,	2908707,	-14.6861	-14.7479	-14.7252	-14.4287	-14.3987	-14.3894	-14.9167	-14.8818	-15.0146	-14.7176	-14.4073	-14.9401	0.000319033	0.00264157	0.00312716	0.00875766	-0.310357	-0.532812	0.806442	0.691206
b2794	queF	chr	+	2923369,	2924218,	-13.9735	-14.0781	-14.0354	-13.4018	-13.4283	-13.3775	-13.9939	-13.9128	-13.8478	-14.0254	-13.4118	-13.9167	0.000430445	0.0031009	0.00327419	0.00898555	-0.613585	-0.504942	0.653571	0.704689
b2806	ygdE	chr	-	2938164,	2939265,	-13.6617	-13.6284	-13.6083	-13.2071	-13.2547	-13.3658	-13.7146	-13.5537	-13.5492	-13.6351	-13.2544	-13.6063	0.0106884	0.0212026	0.0106127	0.0210144	-0.380764	-0.351888	0.768031	0.783558
b2808	gcvA	chr	-	2939671,	2940589,	-15.6861	-15.8151	-15.8463	-15.4342	-15.5549	-15.4503	-16.0756	-16.214	-16.1822	-15.7732	-15.4979	-16.1531	0.00948931	0.0192066	0.000292258	0.00217702	-0.27527	-0.655203	0.826295	0.634986
b2827	thyA	chr	-	2962382,	2963177,	-12.3802	-12.365	-12.3076	-11.9433	-11.9117	-11.9224	-12.4468	-12.4783	-12.4673	-12.354	-11.9238	-12.4633	0.000740889	0.00413915	2.08869e-06	0.000182241	-0.430254	-0.53956	0.742131	0.687981
b2828	lgt	chr	-	2963183,	2964059,	-12.6992	-12.7292	-12.7056	-12.339	-12.3901	-12.3835	-12.9034	-13.0759	-12.8272	-12.711	-12.3719	-12.9237	0.00024743	0.00226406	0.0133772	0.0250394	-0.339104	-0.551809	0.790532	0.682164
b2890	lysS	chr	-	3031678,	3033196,	-9.82014	-9.90086	-9.81604	-9.33551	-9.33053	-9.47578	-9.8966	-9.84828	-9.85712	-9.8453	-9.35288	-9.86815	0.00268459	0.00887554	0.00560748	0.0131201	-0.492419	-0.515277	0.710832	0.699659
b2891	prfB	chr	-	3033205,	3034304,	-10.2559	-10.2029	-10.2729	-10.0594	-10.1161	-10.1086	-10.3262	-10.3283	-10.2978	-10.2429	-10.0958	-10.3166	0.00613113	0.0143299	0.00135677	0.00527599	-0.147068	-0.220837	0.903084	0.858068
b2893	dsbC	chr	-	3036133,	3036844,	-12.3354	-12.3065	-12.3743	-12.0671	-12.0522	-11.9441	-12.5038	-12.4251	-12.5176	-12.3367	-12.0405	-12.485	0.00549546	0.013409	0.000979497	0.00452679	-0.29617	-0.444418	0.814412	0.73488
b2909	ygfB	chr	-	3052887,	3053466,	-12.15	-12.129	-12.1584	-11.6449	-11.6733	-11.8025	-12.1246	-12.0143	-12.1308	-12.1454	-11.6821	-12.0933	0.0101231	0.0203461	0.00408865	0.0105015	-0.463266	-0.411217	0.725343	0.751989
b2937	speB	chr	-	3080898,	3081819,	-11.2876	-11.2978	-11.2757	-10.9912	-11.0431	-11.1086	-11.3919	-11.4251	-11.439	-11.2875	-11.035	-11.4183	0.0168268	0.0292467	0.00341206	0.00927097	-0.252543	-0.383322	0.839416	0.76667
b2942	metK	chr	+	3084727,	3085882,	-10.1443	-10.146	-10.1479	-9.83675	-9.87726	-9.87157	-10.3862	-10.4237	-10.3804	-10.1459	-9.86276	-10.3951	0.00186707	0.00719875	9.03213e-06	0.000380392	-0.283151	-0.532343	0.821794	0.691431
b2946	rsmE	chr	+	3089155,	3089887,	-14.6323	-14.6776	-14.6593	-14.0649	-14.1582	-14.0415	-14.484	-14.356	-14.439	-14.6549	-14.1088	-14.4293	0.00154415	0.0062264	0.00285914	0.00834868	-0.546106	-0.320455	0.684866	0.800817
b2951	yggS	chr	+	3093119,	3093824,	-13.6725	-13.6045	-13.5557	-13.1144	-13.1892	-13.0509	-13.6107	-13.655	-13.5903	-13.6156	-13.1428	-13.6163	0.000807839	0.0042941	0.00182136	0.00627378	-0.472859	-0.473526	0.720535	0.720202
[truncated: 105 more rows]

## Sheet: (WT, C) > M
# Note: These are taken only from the case where both comparisons are significant						Replicates Separate									Replicates Combined									Fold Change
[truncated: 228 more rows]
