# Supplementary material for: The conserved GTPase LepA contributes mainly to translation initiation in Escherichia coli
Source: Oxford University Press journal article supplement (doi:10.1093/nar/gku1098), 2014-11-06
Supplement: gku1098_Supplementary_Data.zip [file gku1098_Supplementary_Data.zip › nar-02711-v-2014-File012.xls]

## Sheet: All
Total RNA Samples
WT = wild-type control strain
M = ΔlepA mutant strain						Log Base 2 of Normalized Coverages
C = ΔlepA(pLEPA) complemented strain						Replicates Separate									Replicates Combined									Fold Change
Name	Name2	Chr	Strand	Start	End	WT_1	WT_2	WT_3	M_1	M_2	M_3	C_1	C_2	C_3	WT_(1,2,3)	M_(1,2,3)	C_(1,2,3)	WT/M p-value	WT/M BH q-value	C/M p-value	C/M BH q-value	WT – M	C – M	WT/ M	C / M
Below are those genes significant in both WT/M and C/M comparisons
b2151	galS	chr	-	2238649,	2239690,	-15.2658	-15.6924	-15.4247	-11.644	-11.9527	-11.8776	-14.745	-14.5525	-14.3395	-15.4667	-11.8188	-14.6093	3.69596e-05	0.00160774	7.7009e-05	0.00297545	-3.64796	-2.79048	0.0797729	0.144538
b3544	dppA	chr	-	3704120,	3705728,	-14.1562	-14.1075	-14.1944	-10.6292	-10.5121	-10.4593	-13.9978	-13.4911	-14.477	-14.1539	-10.543	-13.8492	9.88818e-06	0.000967806	0.00552169	0.0251449	-3.61087	-3.30622	0.0818503	0.101095
b3603	lldP	chr	+	3775421,	3777077,	-12.2009	-12.2056	-12.0166	-8.68693	-8.70157	-8.66743	-12.3527	-12.1454	-11.8447	-12.1269	-8.68956	-12.1928	0.000237409	0.00345194	0.00177156	0.013533	-3.43732	-3.5032	0.0923131	0.0881926
b3118	tdcA	chr	-	3264148,	3265087,	-15.8133	-16.0335	-16.3177	-12.9249	-12.7922	-12.931	-13.8244	-13.8282	-13.629	-16.0744	-12.8659	-13.7953	0.000953365	0.00776506	0.000725649	0.00817529	-3.2085	-0.929346	0.10818	0.525096
b2844	yqeF	chr	-	2982432,	2983614,	-14.4694	-14.0096	-13.8583	-11.0066	-11.0305	-11.4398	-12.9825	-13.01	-12.2139	-14.0489	-11.0921	-12.8492	0.000318801	0.00393104	0.0122241	0.0411676	-2.95678	-1.7571	0.128801	0.295841
b1015	putP	chr	+	1078527,	1080036,	-12.6936	-12.8529	-13.3569	-9.98384	-10.0876	-10.0187	-12.923	-13.0761	-12.629	-12.9829	-10.0357	-12.9268	0.0039012	0.0181824	0.00134061	0.011861	-2.94723	-2.89114	0.129657	0.134797
b1415	aldA	chr	+	1486255,	1487695,	-12.1301	-12.2821	-12.2182	-9.43824	-9.34368	-9.46419	-12.4334	-12.4323	-12.0984	-12.2164	-9.40054	-12.3786	1.52661e-06	0.000431497	0.000560627	0.00712574	-2.8159	-2.97804	0.142014	0.126918
b2365	dsdX	chr	+	2475868,	2477206,	-14.8699	-15.6924	-14.3702	-11.8893	-12.2476	-12.1044	-15.16	-16.0761	-16.2139	-14.852	-12.0803	-15.5634	0.0126038	0.0370311	0.00439647	0.0216562	-2.77168	-3.4831	0.146434	0.0894297
b4208	cycA	chr	+	4427886,	4429299,	-13.6069	-13.8959	-14.0166	-11.2834	-11.0369	-10.9585	-13.0766	-13.4037	-13.4066	-13.8594	-11.1054	-13.2325	8.38515e-05	0.00238748	0.0001249	0.00387997	-2.75397	-2.1271	0.148243	0.228918
b0598	cstA	chr	+	629116,	631222,	-13.3043	-13.4974	-12.8213	-10.3964	-10.4922	-10.4016	-12.1948	-12.4179	-12.3395	-13.1493	-10.439	-12.292	0.00441492	0.0195857	0.000171519	0.00422765	-2.71037	-1.85304	0.152791	0.276809
b3707	tnaC	chr	+	3886457,	3886532,	-12.1129	-11.8796	-12.0218	-9.41146	-9.28717	-9.37123	-12.1345	-12.2559	-12.4413	-11.993	-9.34763	-12.2192	4.47865e-05	0.00169588	0.000189936	0.00443939	-2.6454	-2.87152	0.159829	0.136642
b4035	malK	chr	+	4244806,	4245922,	-12.8699	-12.7805	-12.8772	-10.2673	-10.2495	-10.3014	-13.6455	-13.7186	-13.9915	-12.841	-10.2659	-13.718	7.3724e-06	0.000769678	0.000723069	0.00817529	-2.57512	-3.45206	0.167807	0.091375
b0721	sdhC	chr	+	754399,	754789,	-13.8991	-13.6184	-14.6015	-11.7046	-11.5346	-11.5194	-12.8519	-13.2181	-12.9915	-14.0155	-11.5912	-12.9936	0.0113904	0.0350869	0.00108277	0.0101678	-2.42436	-1.40243	0.186292	0.378291
b3528	dctA	chr	-	3680183,	3681470,	-10.803	-10.824	-10.6946	-8.3945	-8.38041	-8.33027	-10.3308	-10.1813	-10.1916	-10.7663	-8.37564	-10.2551	1.93092e-05	0.00109636	0.000127384	0.00387997	-2.39066	-1.87947	0.190695	0.271783
b1189	dadA	chr	+	1236793,	1238092,	-12.9138	-12.6736	-12.3836	-10.2201	-10.2588	-10.1671	-12.6216	-12.9676	-12.8447	-12.6056	-10.2265	-12.769	0.00313988	0.0158157	0.000813171	0.00890508	-2.37914	-2.54252	0.192224	0.171642
b2805	fucR	chr	+	2937389,	2938121,	-15.5138	-14.9861	-15.6015	-13.1938	-12.76	-13.0442	-14.3429	-14.4911	-15.2139	-15.3375	-12.9597	-14.4974	0.0010175	0.00805794	0.0125305	0.0413982	-2.37775	-1.53766	0.192409	0.344444
b0064	araC	chr	+	70386,	71265,	-15.8133	-15.6924	-15.4247	-13.0142	-13.4381	-13.3014	-15.0929	-15.1692	-14.477	-15.6088	-13.2444	-15.0089	0.000153544	0.00306708	0.00595404	0.0261911	-2.36432	-1.76443	0.194208	0.294343
b2869	ygeV	chr	-	3002029,	3003808,	-14.4694	-14.8111	-15.6015	-12.7615	-12.5714	-12.6146	-14.1261	-14.1219	-14.629	-14.9589	-12.6464	-14.1884	0.0180467	0.0464057	0.00570938	0.0256186	-2.31253	-1.542	0.201308	0.34341
b1799	yeaT	chr	-	1878909,	1879833,	-15.5138	-14.8111	-15.2182	-12.9541	-12.7495	-12.801	-14.0288	-13.9062	-14.2139	-15.1269	-12.831	-14.0089	0.00438711	0.0195343	0.000684586	0.00799997	-2.29585	-1.17783	0.203648	0.442017
b4033	malF	chr	-	4241553,	4243098,	-13.7324	-14.2399	-13.6988	-11.4447	-11.6826	-11.6589	-14.4649	-15.1692	-15.2139	-13.8743	-11.587	-14.7821	0.00193783	0.0116717	0.00275746	0.0168761	-2.28728	-3.19509	0.204862	0.10919
b1190	dadX	chr	+	1238101,	1239172,	-12.8133	-12.8111	-12.7852	-10.647	-10.5483	-10.4642	-13.5751	-13.4911	-12.9409	-12.8014	-10.5664	-13.4342	0.00039675	0.00437543	0.00316669	0.0175852	-2.23504	-2.86781	0.212416	0.136995
b3418	malT	chr	+	3551106,	3553812,	-12.1129	-12.3256	-12.1083	-9.98197	-10.0099	-9.91075	-11.5356	-11.3346	-11.3232	-12.1813	-9.98003	-11.429	0.000219741	0.00333435	0.000576868	0.00721908	-2.2013	-1.44899	0.217442	0.366277
b0240	crl	chr	+	257828,	258230,	-12.5949	-12.9861	-12.9855	-10.566	-10.8224	-10.7341	-12.8381	-12.4762	-12.7114	-12.8743	-10.7072	-12.6808	0.000526462	0.00515275	0.000215216	0.00461683	-2.16703	-1.97356	0.222669	0.254624
b3995	rsd	chr	-	4194354,	4194831,	-13.5365	-13.918	-13.8213	-11.5745	-11.5854	-11.7401	-13.0766	-13.0537	-13.7114	-13.7732	-11.61	-13.1456	0.000633224	0.00590546	0.0127223	0.0417277	-2.1632	-1.53555	0.223261	0.344948
b0880	cspD	chr	-	921588,	921813,	-12.0708	-12.4646	-12.4247	-10.2201	-10.1315	-10.2666	-11.8244	-12.0317	-11.6696	-12.3375	-10.189	-11.87	0.00168352	0.010717	0.00156477	0.0128422	-2.1485	-1.68101	0.225547	0.311864
b2149	mglA	chr	-	2235790,	2237311,	-12.3141	-12.7704	-12.4247	-10.5081	-10.2834	-10.4495	-14.0288	-13.4037	-14.0984	-12.5038	-10.3937	-13.7821	0.000997954	0.00801434	0.00215787	0.0148032	-2.11013	-3.38839	0.231626	0.095498
b2597	raiA	chr	+	2735175,	2735517,	-10.004	-10.1492	-10.1435	-8.00323	-8.04742	-7.99895	-9.7612	-9.7076	-9.7545	-10.1081	-8.02175	-9.74088	0.000161564	0.00306708	2.04051e-07	0.000104281	-2.08634	-1.71913	0.235478	0.303731
b1729	ydjN	chr	+	1808957,	1810349,	-14.2658	-15.2399	-14.1944	-12.5576	-12.3963	-12.2327	-14.0929	-14.1692	-13.9915	-14.5009	-12.4185	-14.104	0.0174647	0.0456281	0.000455505	0.00639526	-2.08249	-1.68556	0.236107	0.310883
b2181	yejG	chr	-	2275914,	2276259,	-15.6069	-15.3554	-14.8032	-13.1094	-13.0146	-13.1995	-14.0929	-13.6498	-13.9915	-15.163	-13.0833	-13.9052	0.00927814	0.0303331	0.0162273	0.0478569	-2.07968	-0.821962	0.236567	0.565672
b0881	clpS	chr	+	922135,	922456,	-13.583	-13.8529	-13.5401	-11.5299	-11.6528	-11.7048	-12.7579	-12.7542	-13.0984	-13.653	-11.6164	-12.8019	0.000327322	0.00396868	0.00295294	0.0171554	-2.03655	-1.1855	0.243745	0.439673
b3688	yidQ	chr	+	3865750,	3866083,	-13.7858	-13.9631	-13.7852	-11.8753	-11.8702	-11.8908	-13.1773	-13.2948	-12.8447	-13.8447	-11.876	-13.1626	0.000808233	0.00691635	0.0117241	0.0401665	-1.96864	-1.28653	0.255494	0.409937
b1976	mtfA	chr	+	2041674,	2042472,	-14.2658	-14.9403	-14.4812	-12.6619	-12.4812	-12.8516	-14.2304	-15.2688	-14.9915	-14.5598	-12.6122	-14.6327	0.00325202	0.0160146	0.0126462	0.041605	-1.94768	-2.02055	0.259233	0.246464
b4055	aphA	chr	+	4267436,	4268150,	-12.8991	-13.1855	-13.2425	-11.2742	-11.1645	-11.2411	-13.2856	-13.1454	-13.4066	-13.1269	-11.2184	-13.2506	0.00157594	0.0105018	0.000273406	0.00498375	-1.90845	-2.03213	0.266379	0.244494
b3709	tnaB	chr	+	3888258,	3889506,	-12.5365	-12.9069	-12.4885	-10.7328	-10.7208	-10.7282	-13.6944	-13.5525	-13.629	-12.6338	-10.7266	-13.6327	0.00470097	0.0202501	0.000181501	0.00434115	-1.90726	-2.90613	0.266598	0.133404
b1929	yedE	chr	+	2006300,	2007506,	-12.6189	-12.6366	-12.7764	-10.8546	-10.7054	-10.8645	-11.5694	-11.5525	-11.4413	-12.6854	-10.7886	-11.5439	1.29239e-05	0.0010652	0.000539657	0.00698432	-1.89679	-0.755278	0.26854	0.592432
b4310	yjhT	chr	-	4535681,	4536788,	-15.1214	-15.2965	-14.6015	-12.9249	-13.161	-13.074	-16.0929	-16.4911	-17.7989	-14.9432	-13.0542	-16.3935	0.00653769	0.0248496	0.0170529	0.0492067	-1.88892	-3.33928	0.270008	0.0988046
b2799	fucO	chr	-	2929886,	2931038,	-15.1214	-15.4168	-15.3702	-13.1765	-13.49	-13.9041	-14.9674	-14.7542	-15.2139	-15.317	-13.4333	-14.9196	0.00619488	0.0241414	0.00715934	0.029663	-1.88365	-1.48626	0.270997	0.356937
b3749	rbsA	chr	+	3931800,	3933306,	-14.0543	-13.7906	-13.7328	-11.8206	-12.0531	-12.074	-13.1948	-13.0761	-13.2139	-13.8301	-11.9678	-13.1541	0.000160048	0.00306708	0.000950565	0.00952905	-1.86231	-1.18626	0.275035	0.439441
b1014	putA	chr	-	1074142,	1078105,	-11.548	-11.4974	-11.4705	-9.60158	-9.71565	-9.59555	-12.1515	-12.1572	-11.3395	-11.4995	-9.64967	-12.0012	1.71466e-05	0.00109636	0.012953	0.0423474	-1.84984	-2.35154	0.277423	0.195936
b1138	ymfE	chr	-	1196755,	1197460,	-14.9288	-15.133	-15.0807	-13.4603	-13.2625	-12.8261	-14.8519	-15.1692	-15.477	-15.0573	-13.2314	-15.0399	0.00570986	0.0229721	0.00159851	0.0129034	-1.82597	-1.80851	0.282052	0.285485
b0722	sdhD	chr	+	754782,	755130,	-13.3043	-13.2965	-13.3702	-11.3839	-11.7234	-11.3102	-13.267	-13.3482	-13.2753	-13.3272	-11.5081	-13.2967	0.00370407	0.0175775	0.00363564	0.0191697	-1.81906	-1.78854	0.283405	0.289464
b2414	cysK	chr	+	2530430,	2531402,	-12.9746	-12.8008	-13.1251	-11.2069	-11.1264	-11.1044	-13.2486	-13.1219	-12.9915	-12.9669	-11.1508	-13.1626	0.00111933	0.00842723	0.000309974	0.00524897	-1.81608	-2.01176	0.283992	0.24797
b0382	iraP	chr	+	400609,	400870,	-14.8699	-14.5828	-14.3437	-12.7108	-12.7707	-12.8261	-14.267	-14.0317	-14.3395	-14.5479	-12.759	-14.1884	0.00508692	0.0212998	0.00172119	0.0134313	-1.78887	-1.42941	0.289399	0.371284
b4014	aceB	chr	+	4213500,	4215102,	-12.6069	-12.0886	-12.1944	-10.4867	-10.4424	-10.5041	-12.6098	-12.4614	-12.071	-12.25	-10.4702	-12.4654	0.00687434	0.0256789	0.00649962	0.0279627	-1.77975	-1.99517	0.291235	0.250838
b0453	ybaY	chr	+	474602,	475175,	-15.4263	-15.4809	-15.4247	-13.6146	-13.7182	-13.7048	-16.745	-16.4911	-16.7989	-15.4444	-13.6771	-16.6566	1.27562e-05	0.0010652	0.000322685	0.00529905	-1.7673	-2.9795	0.293757	0.126789
b0655	gltI	chr	-	686061,	686970,	-14.7064	-15.6184	-15.2182	-13.2113	-13.5996	-13.7048	-15.0288	-14.5525	-14.7989	-15.1813	-13.4635	-14.8086	0.0101062	0.0322328	0.00327271	0.0180649	-1.71778	-1.34501	0.304015	0.39365
b0723	sdhA	chr	+	755129,	756896,	-10.3067	-10.2839	-10.2394	-8.52441	-8.63927	-8.61729	-10.5924	-10.6415	-10.3559	-10.272	-8.59221	-10.5719	2.00463e-05	0.00109636	0.000580845	0.00721908	-1.67977	-1.97972	0.312132	0.253539
b0720	gltA	chr	-	752407,	753691,	-11.0543	-11.2364	-11.2333	-9.5176	-9.48009	-9.55828	-11.8313	-11.8	-12.477	-11.186	-9.50861	-11.8981	0.000374703	0.00431459	0.00712056	0.029663	-1.67735	-2.3895	0.312656	0.190848
b4140	fxsA	chr	+	4366686,	4367163,	-13.7858	-13.7309	-13.7328	-12.2379	-11.971	-12.0296	-14.0288	-14.8282	-14.7989	-13.7456	-12.0745	-14.3736	0.00155424	0.0104461	0.0067942	0.0286194	-1.67113	-2.29912	0.314008	0.203187
b3224	nanT	chr	-	3369105,	3370596,	-11.6809	-12.1202	-11.9855	-10.3914	-10.2328	-10.1751	-12.6216	-12.4323	-12.5894	-11.9432	-10.2768	-12.5466	0.00158489	0.0105167	1.38197e-05	0.00144278	-1.66641	-2.26988	0.315036	0.207347
b4240	treB	chr	-	4462781,	4464203,	-8.24171	-8.25735	-8.25357	-6.59117	-6.61329	-6.5778	-7.63536	-7.68326	-7.53445	-8.25181	-6.59828	-7.63678	1.65325e-06	0.000431497	0.00112447	0.0103584	-1.65353	-1.0385	0.317862	0.486833
b2150	mglB	chr	-	2237371,	2238370,	-10.739	-10.6712	-10.6759	-9.00275	-9.04823	-9.08909	-12.0288	-11.9676	-11.9915	-10.6903	-9.03924	-12.0012	1.18626e-06	0.000431497	2.66363e-07	0.000104281	-1.65106	-2.96197	0.318405	0.128339
b2535	csiE	chr	+	2663456,	2664737,	-13.9902	-14.2965	-14.7328	-12.7233	-12.6187	-13.0442	-14.3824	-13.7542	-14.2139	-14.3582	-12.7312	-14.104	0.00674334	0.025446	0.00635839	0.0275062	-1.62704	-1.37285	0.323752	0.386128
b3748	rbsD	chr	+	3931373,	3931793,	-9.79266	-9.78426	-10.0231	-8.32861	-8.27908	-8.17715	-9.50387	-9.58827	-9.71143	-9.87615	-8.27634	-9.56275	0.000273494	0.00369217	0.000102751	0.003498	-1.59981	-1.28641	0.329921	0.409971
b2518	ndk	chr	-	2642454,	2642886,	-12.1918	-11.8529	-11.9855	-10.4629	-10.3457	-10.3506	-12.1261	-11.9993	-12.1265	-11.987	-10.3883	-12.0796	0.00129798	0.00928144	8.34121e-06	0.00144278	-1.59869	-1.69137	0.330176	0.309632
b2584	yfiQ	chr	+	2717974,	2720635,	-12.7324	-12.7906	-12.7072	-11.2696	-11.0402	-11.2243	-11.9377	-12.1219	-11.892	-12.7422	-11.1554	-11.9936	0.000724129	0.0064067	0.00125414	0.0112873	-1.58679	-0.838168	0.33291	0.559353
b4142	groS	chr	+	4368710,	4369004,	-11.5138	-11.322	-11.3503	-9.77764	-9.83488	-9.77325	-11.8659	-12.0874	-11.9162	-11.3806	-9.80179	-11.9487	0.000515476	0.00510908	0.000404794	0.00590554	-1.57881	-2.14695	0.334758	0.225789
b0080	fruR	chr	+	88027,	89032,	-13.3239	-13.3404	-13.2182	-11.7423	-11.6776	-11.7282	-12.4026	-12.6167	-12.551	-13.2868	-11.7106	-12.4974	4.65237e-05	0.00169588	0.00335749	0.0181305	-1.57618	-0.786719	0.335368	0.579661
b3962	sthA	chr	-	4157412,	4158813,	-12.1044	-12.0215	-12.1139	-10.5217	-10.4944	-10.6037	-12.16	-11.8962	-11.892	-12.0787	-10.5249	-12.0204	4.5149e-06	0.00073072	0.00145185	0.0124552	-1.55377	-1.49547	0.340619	0.354665
b1332	ynaJ	chr	+	1395388,	1395646,	-12.2009	-12.1459	-12.4316	-10.8546	-10.7105	-10.6477	-12.4026	-12.2688	-12.9915	-12.2671	-10.7485	-12.4239	0.000278794	0.00370187	0.0102948	0.0372175	-1.51856	-1.6754	0.349035	0.31308
b2210	mqo	chr	-	2303129,	2304776,	-14.2658	-14.3554	-14.6988	-13.0452	-12.9895	-12.801	-15.2304	-15.4911	-14.629	-14.4555	-12.9705	-15.2059	0.00180677	0.0112278	0.00912278	0.0339406	-1.485	-2.23539	0.357249	0.212364
b3496	yhiP	chr	+	3638884,	3640354,	-12.9902	-12.4646	-12.6988	-11.3545	-11.1822	-11.0516	-12.4649	-12.5525	-12.629	-12.6788	-11.2152	-12.5191	0.00251036	0.0138912	0.000760141	0.00844242	-1.46361	-1.30384	0.362584	0.405048
b4217	ytfK	chr	+	4437609,	4437816,	-11.0179	-11.0824	-11.1	-9.62923	-9.60433	-9.58748	-11.3092	-11.3619	-11.7545	-11.0723	-9.61005	-11.386	2.08165e-05	0.00109636	0.00533216	0.0246317	-1.46222	-1.77598	0.362934	0.291996
b3672	ivbL	chr	-	3850912,	3851011,	-10.1717	-10.2451	-10.1885	-8.64845	-8.84258	-8.73562	-9.59817	-9.4874	-9.32316	-10.2035	-8.7485	-9.51496	0.0003825	0.00433449	0.00263454	0.0163718	-1.45496	-0.76646	0.364765	0.587858
b4139	aspA	chr	-	4364913,	4366350,	-9.69518	-9.4974	-9.67182	-8.19105	-8.12812	-8.19338	-9.14085	-9.07189	-9.30303	-9.61459	-8.16335	-9.13823	0.000687152	0.00622012	0.0024196	0.0154657	-1.45125	-0.974887	0.365705	0.50878
b2899	yqfA	chr	-	3040510,	3041170,	-13.7858	-13.3858	-13.1944	-12.1176	-11.9346	-11.801	-12.923	-13.0317	-12.9915	-13.3953	-11.9705	-12.971	0.00449858	0.0197877	0.00401058	0.020728	-1.42476	-1.00048	0.37248	0.499832
b3934	cytR	chr	-	4121453,	4122479,	-13.7858	-13.5653	-13.7852	-12.2201	-12.3477	-12.3552	-13.3429	-13.7907	-13.4066	-13.7052	-12.3013	-13.4974	0.000298791	0.0038267	0.00831623	0.0320769	-1.40391	-1.19608	0.377905	0.436458
b3932	hslV	chr	-	4119779,	4120310,	-13.4477	-12.9861	-13.3569	-11.8139	-12.002	-11.5929	-13.7195	-13.9886	-13.551	-13.2379	-11.8459	-13.7821	0.00155011	0.0104461	0.0003709	0.00575079	-1.39203	-1.93621	0.381027	0.261302
b3708	tnaA	chr	+	3886752,	3888168,	-8.17335	-8.19635	-8.19547	-6.86102	-6.78884	-6.77096	-9.39881	-9.21813	-9.17684	-8.19003	-6.81117	-9.29842	0.000165702	0.00306708	0.000154079	0.00407331	-1.37886	-2.48725	0.384523	0.178346
b4153	frdB	chr	-	4377805,	4378540,	-12.8273	-13.2261	-13.0917	-11.6146	-11.776	-11.6366	-12.6098	-12.6667	-12.5135	-13.0616	-11.6882	-12.6151	0.00262812	0.0142779	0.00018296	0.00434115	-1.37342	-0.926914	0.385974	0.525982
b4089	rpiR	chr	-	4310123,	4311014,	-14.3043	-14.3256	-14.1944	-12.6984	-13.1751	-12.801	-13.7195	-14.4323	-14.2139	-14.2671	-12.912	-14.0089	0.00717801	0.0262242	0.0115607	0.0397018	-1.35501	-1.09681	0.390931	0.467548
b0882	clpA	chr	+	922486,	924763,	-11.0917	-11.311	-11.3803	-9.85456	-10.0515	-9.80097	-11.2304	-11.1752	-11.1842	-11.2769	-9.9271	-11.2037	0.000330306	0.00396868	0.00235629	0.015185	-1.34981	-1.2766	0.392344	0.412767
b0473	htpG	chr	+	494343,	496218,	-11.7193	-11.8008	-11.6413	-10.2627	-10.5032	-10.3058	-12.0848	-12.2688	-12.2139	-11.7152	-10.3729	-12.1668	0.000303008	0.0038267	7.01237e-05	0.00296794	-1.34224	-1.7939	0.394407	0.288392
b4411	ecnB	chr	+	4374575,	4374722,	-11.5194	-11.6596	-11.4812	-10.1321	-10.2588	-10.2581	-11.7579	-12.1336	-11.966	-11.5509	-10.2112	-11.9124	6.36826e-05	0.00191783	0.0014054	0.0121594	-1.33965	-1.70119	0.395118	0.307532
b0810	glnP	chr	-	845682,	846342,	-14.3043	-14.7309	-14.3702	-13.1594	-13.2182	-13.0442	-14.5524	-14.1219	-14.0984	-14.4667	-13.1616	-14.3155	0.00466059	0.0202174	0.0103738	0.0372602	-1.30513	-1.15392	0.404685	0.449403
b3832	rmuC	chr	+	4015355,	4016783,	-14.0875	-14.3858	-13.6015	-12.5135	-12.8251	-12.5715	-13.4863	-13.4911	-13.477	-13.9589	-12.6551	-13.4866	0.0150798	0.0413572	0.0123694	0.041177	-1.30384	-0.831531	0.405048	0.561933
b0146	sfsA	chr	-	160781,	161486,	-13.4263	-13.548	-13.2182	-12.1679	-12.021	-12.074	-12.7842	-12.8473	-12.5894	-13.3793	-12.0833	-12.7755	0.00165376	0.0107016	0.00453009	0.0221226	-1.29599	-0.692271	0.407255	0.618879
b2964	nupG	chr	+	3103735,	3104992,	-12.7193	-12.5828	-12.3836	-11.1722	-11.2701	-11.3552	-13.143	-12.9264	-13.155	-12.533	-11.2494	-13.0636	0.00118243	0.0087243	8.09477e-05	0.00301819	-1.28369	-1.81425	0.410745	0.284353
b0163	yaeH	chr	-	183708,	184095,	-13.8413	-13.8959	-13.8213	-12.603	-12.4129	-12.931	-13.53	-13.6498	-14.0984	-13.852	-12.5705	-13.6446	0.0139319	0.0396091	0.00883402	0.033255	-1.28156	-1.07412	0.41135	0.47496
b0014	dnaK	chr	+	12162,	14079,	-9.76222	-9.64687	-9.85948	-8.51014	-8.46596	-8.49404	-10.3975	-10.3013	-10.459	-9.75765	-8.48736	-10.3712	0.00162628	0.0105675	0.00024732	0.0047232	-1.27029	-1.8838	0.414576	0.270969
b3336	bfr	chr	-	3464270,	3464747,	-13.583	-12.8959	-13.1364	-11.7615	-12.0083	-11.8388	-13.2486	-13.8667	-13.892	-13.1448	-11.8811	-13.53	0.0136926	0.0394166	0.00773614	0.0308265	-1.26367	-1.64889	0.416482	0.318884
b0963	mgsA	chr	-	1025779,	1026238,	-11.2054	-11.6596	-11.5705	-10.1765	-10.2948	-10.3236	-11.3725	-11.4987	-11.3895	-11.4952	-10.256	-11.4188	0.00783786	0.0276188	4.82174e-05	0.0026191	-1.23924	-1.16284	0.423596	0.446633
b3605	lldD	chr	+	3777849,	3779040,	-11.6746	-11.8214	-12.0917	-10.5437	-10.6726	-10.7763	-13.3429	-13.5215	-12.7545	-11.8799	-10.6432	-13.2967	0.00287805	0.0147771	0.00508737	0.0242891	-1.23673	-2.6535	0.424334	0.158934
b4154	frdA	chr	-	4378532,	4380341,	-11.7129	-11.6782	-11.6133	-10.4525	-10.4922	-10.2883	-11.2125	-11.1103	-10.9787	-11.661	-10.4361	-11.1393	0.000502038	0.00506674	0.00174316	0.0134671	-1.22485	-0.703144	0.427842	0.614232
b4143	groL	chr	+	4369047,	4370694,	-9.07913	-8.94458	-8.94705	-7.75663	-7.7929	-7.73711	-9.19481	-9.32457	-9.20643	-8.97914	-7.7687	-9.24152	0.000387502	0.00433449	0.000169087	0.00422765	-1.21045	-1.47282	0.432135	0.360276
b3766	ilvL	chr	+	3948344,	3948443,	-8.9717	-8.92214	-8.97218	-7.73276	-7.77839	-7.7179	-8.80249	-8.77919	-8.7328	-8.95449	-7.74981	-8.78373	1.12082e-06	0.000431497	3.45771e-06	0.000902463	-1.20468	-1.03392	0.433867	0.488382
b4352	yjiA	chr	-	4585931,	4586888,	-14.3845	-14.2399	-14.5401	-13.229	-13.3239	-12.931	-14.5524	-14.4323	-14.9915	-14.3899	-13.2056	-14.5634	0.00162114	0.0105675	0.00297093	0.0171678	-1.18431	-1.35784	0.440036	0.390167
b2833	ygdR	chr	+	2969292,	2969511,	-13.8413	-13.4325	-13.6332	-12.5027	-12.5256	-12.1995	-13.4863	-13.6167	-13.7114	-13.6088	-12.4484	-13.5634	0.00156772	0.0104917	0.00147787	0.0125779	-1.16039	-1.11509	0.447391	0.461663
b4480	hdfR	chr	-	3945150,	3945990,	-14.8133	-14.6549	-15.2671	-13.5027	-13.8475	-14.1354	-14.7975	-14.6838	-15.2139	-14.9121	-13.759	-14.8086	0.0138976	0.0396091	0.0122093	0.0411676	-1.15314	-1.04956	0.449645	0.483116
b4376	osmY	chr	+	4609418,	4610024,	-14.7589	-15.3554	-14.8032	-13.8409	-13.8702	-13.6589	-15.6455	-16.0761	-15.7989	-14.9589	-13.8163	-15.8086	0.0169328	0.0446409	0.000696313	0.00801784	-1.1426	-1.99222	0.452942	0.251351
b2678	proW	chr	+	2804031,	2805096,	-12.0875	-12.2965	-12.1307	-11.0571	-11.0893	-10.8974	-12.53	-12.9468	-12.5894	-12.1744	-11.0385	-12.6747	0.000190875	0.00308155	0.00185288	0.0136226	-1.13589	-1.63618	0.455055	0.321707
b0030	rihC	chr	+	27292,	28207,	-13.8699	-13.8111	-13.6822	-12.6381	-12.6978	-12.5092	-13.6944	-13.6838	-13.7989	-13.7732	-12.6378	-13.7055	0.000117249	0.00293329	0.000197534	0.00445786	-1.13547	-1.0677	0.455185	0.477081
b2148	mglC	chr	-	2234764,	2235775,	-10.8343	-11.0577	-10.7942	-9.81726	-9.75211	-9.75206	-12.771	-12.7907	-12.4413	-10.8912	-9.77549	-12.7242	0.00333691	0.0163812	0.0010908	0.0101678	-1.1157	-2.94875	0.461466	0.12952
b2677	proV	chr	+	2802836,	2804039,	-12.1214	-12.0638	-12.1139	-11.073	-10.9227	-11.0079	-12.7069	-12.8863	-13.2139	-12.0982	-10.9924	-12.8355	0.000366203	0.00424795	0.00339031	0.0182447	-1.10586	-1.84316	0.464625	0.27871
b4322	uxuA	chr	+	4549658,	4550843,	-14.3845	-14.1855	-14.3972	-13.0142	-13.3718	-13.2666	-14.3044	-14.2181	-13.9915	-14.317	-13.212	-14.2236	0.00185375	0.011429	0.00266017	0.0164657	-1.10498	-1.01159	0.46491	0.495999
b4034	malE	chr	-	4243251,	4244442,	-11.006	-11.0215	-10.9958	-9.87881	-9.97406	-9.8166	-11.8659	-11.8863	-12.1265	-11.0073	-9.9075	-11.9088	0.00131518	0.0093193	0.000172778	0.00422765	-1.0998	-2.00132	0.46658	0.249772
b0724	sdhB	chr	+	756911,	757628,	-10.8343	-11.0126	-11.1167	-9.85113	-9.91973	-9.99006	-11.6882	-12.0317	-11.5135	-11.0032	-9.9075	-11.7723	0.00160231	0.0105675	0.00451962	0.0221226	-1.09571	-1.86479	0.467905	0.274563
b4214	cysQ	chr	+	4434777,	4435518,	-13.8699	-13.9631	-13.7852	-12.6146	-12.9286	-12.7521	-13.7975	-14.1692	-13.629	-13.8668	-12.7731	-13.891	0.0014187	0.00978714	0.007921	0.0311542	-1.0937	-1.1179	0.46856	0.460764
b3416	malQ	chr	-	3546007,	3548092,	-13.0543	-12.5653	-12.7675	-11.674	-11.6332	-11.7886	-13.143	-13.3482	-12.7545	-12.7594	-11.6771	-13.1456	0.0103245	0.032729	0.0112117	0.038844	-1.08231	-1.46853	0.472271	0.361349
b4036	lamB	chr	+	4245993,	4247334,	-10.6809	-10.7333	-10.6946	-9.64548	-9.63562	-9.61182	-12.508	-12.2817	-12.551	-10.7044	-9.63455	-12.429	3.42076e-06	0.00073072	0.000757003	0.00844242	-1.0698	-2.79448	0.476383	0.144138
b4019	metH	chr	+	4221850,	4225534,	-13.4477	-13.3858	-13.0271	-12.2742	-12.1264	-12.1512	-13.3429	-12.9062	-13.0984	-13.2476	-12.1834	-13.1372	0.00800814	0.0277475	0.0106313	0.0380875	-1.06413	-0.953745	0.478263	0.516291
b2309	hisJ	chr	-	2424027,	2424810,	-14.7064	-14.2679	-14.6657	-13.3989	-13.5256	-13.489	-14.8519	-14.4323	-14.3395	-14.5242	-13.4712	-14.6093	0.0120058	0.0360865	0.016743	0.0489172	-1.05302	-1.13805	0.481959	0.454373
b3403	pck	chr	+	3530839,	3532462,	-10.7456	-10.7115	-10.7897	-9.73433	-9.67383	-9.70185	-10.5552	-10.7452	-10.5992	-10.7508	-9.70105	-10.6268	6.13803e-06	0.000734205	0.00195732	0.0140604	-1.04972	-0.925764	0.48306	0.526402
b3223	nanE	chr	-	3368368,	3369058,	-12.5596	-12.6457	-12.9552	-11.4551	-11.9286	-11.6817	-13.6944	-13.6167	-13.155	-12.7354	-11.6926	-13.5748	0.00502056	0.0211016	0.00137191	0.0120697	-1.04278	-1.88213	0.485391	0.271283
b2741	rpoS	chr	-	2864580,	2865573,	-10.4914	-10.5016	-10.4598	-9.43952	-9.44449	-9.43013	-10.5552	-10.6044	-10.8216	-10.4823	-9.43989	-10.6093	3.20025e-05	0.00145834	0.00436879	0.0216504	-1.04243	-1.16936	0.48551	0.444617
b4040	ubiA	chr	+	4251038,	4251911,	-12.8699	-12.6457	-12.4812	-11.5464	-11.6676	-11.5194	-12.4971	-12.4037	-12.8447	-12.6307	-11.5932	-12.5082	0.00479864	0.0204203	0.010838	0.0384858	-1.03743	-0.914919	0.487193	0.530374
b3430	glgC	chr	-	3566055,	3567351,	-14.1214	-13.9861	-14.1478	-13.1425	-13.002	-12.9865	-14.2304	-14.4911	-14.3395	-14.083	-13.0485	-14.3346	0.000122311	0.00293329	0.000324846	0.00529905	-1.03452	-1.28612	0.488179	0.410052
b0435	bolA	chr	+	453695,	454013,	-12.548	-12.1459	-12.6252	-11.4447	-11.3437	-11.411	-12.53	-12.7011	-12.5894	-12.4223	-11.3928	-12.5977	0.0167687	0.0444327	0.000145833	0.00401778	-1.02954	-1.20487	0.489865	0.433808
b1739	osmE	chr	-	1819941,	1820280,	-11.9902	-11.6366	-11.7632	-10.7711	-10.7495	-10.7223	-12.3625	-12.1103	-12.3726	-11.7715	-10.752	-12.2688	0.00862667	0.0291311	0.00251756	0.0158972	-1.01951	-1.51683	0.493284	0.349452
b3751	rbsB	chr	+	3934300,	3935191,	-10.3239	-10.3992	-10.4633	-9.48134	-9.3891	-9.3014	-10.5189	-10.6795	-10.8682	-10.404	-9.4042	-10.6224	0.000158048	0.00306708	0.00145549	0.0124552	-0.999817	-1.21821	0.500064	0.429817
b0710	ybgI	chr	+	742049,	742793,	-14.1918	-14.0577	-13.5552	-12.8964	-12.9771	-12.6146	-13.8519	-13.7186	-13.3395	-13.8668	-12.871	-13.718	0.0138062	0.0395979	0.0159081	0.0473631	-0.995849	-0.846987	0.501441	0.555945
b1612	fumA	chr	-	1684754,	1686401,	-11.2284	-11.2965	-11.1826	-10.2696	-10.2218	-10.2285	-11.923	-11.7274	-11.629	-11.2331	-10.2403	-11.8052	0.000180186	0.00306708	0.00255144	0.0160183	-0.992776	-1.56489	0.50251	0.338004
b0439	lon	chr	+	458111,	460466,	-10.3845	-10.4207	-10.5252	-9.45246	-9.49106	-9.45193	-10.7037	-10.7452	-10.5797	-10.4513	-9.46928	-10.6993	0.000829038	0.00705583	0.000920658	0.00947228	-0.982034	-1.22998	0.506265	0.426324
b2366	dsdA	chr	+	2477223,	2478552,	-13.3239	-13.159	-12.8583	-12.069	-12.2328	-11.8388	-14.0929	-14.3757	-13.9915	-13.0701	-12.0892	-14.1711	0.00427606	0.0192977	0.000202282	0.0044616	-0.980976	-2.08198	0.506637	0.23619
b0679	nagE	chr	+	703166,	705113,	-10.5138	-10.7139	-10.8374	-9.72332	-9.73637	-9.71058	-10.9524	-10.8618	-10.5894	-10.7052	-9.72658	-10.8613	0.00908342	0.0300098	0.00982771	0.0357577	-0.9786	-1.13469	0.507472	0.455431
b2096	gatY	chr	-	2174371,	2175226,	-9.06771	-9.00665	-9.0644	-8.06002	-8.09012	-8.03781	-8.98536	-9.02219	-8.78208	-9.04493	-8.06887	-8.96633	4.84773e-06	0.00073072	0.00570432	0.0256186	-0.976062	-0.897458	0.508365	0.536832
b4323	uxuB	chr	+	4550923,	4552384,	-13.8133	-13.6549	-13.7675	-12.7108	-12.905	-12.5929	-13.8799	-13.6167	-13.477	-13.7388	-12.7684	-13.718	0.00223015	0.0126997	0.00427711	0.0216063	-0.970411	-0.949557	0.510361	0.517791
b0432	cyoA	chr	-	449886,	450834,	-10.4	-10.3092	-10.4509	-9.39139	-9.44983	-9.45927	-10.7195	-10.723	-10.8331	-10.3872	-9.43007	-10.7369	0.000265162	0.00367207	4.85019e-05	0.0026191	-0.957182	-1.30683	0.515062	0.404207
b3398	yrfF	chr	+	3524490,	3526626,	-12.6311	-12.5916	-12.8397	-11.7423	-11.776	-11.6477	-12.771	-12.4037	-12.477	-12.6952	-11.7381	-12.5862	0.00166733	0.010717	0.0111228	0.0387073	-0.957166	-0.848092	0.515068	0.555519
b4037	malM	chr	+	4247576,	4248497,	-10.0199	-9.9602	-9.93404	-9.07395	-8.96639	-9.10436	-11.0327	-11.1874	-11.155	-9.9649	-9.03108	-11.104	0.000179106	0.00306708	5.76123e-06	0.00128887	-0.933813	-2.07293	0.523473	0.237676
b3225	nanA	chr	-	3370704,	3371598,	-10.8484	-10.8008	-10.8987	-9.93037	-9.88317	-10.0516	-11.7258	-11.5763	-11.7765	-10.8511	-9.93171	-11.6778	0.000438292	0.00473356	3.13822e-05	0.00196578	-0.919391	-1.74604	0.528732	0.298119
b2175	spr	chr	+	2268000,	2268567,	-8.5187	-8.52936	-8.52797	-7.59583	-7.62049	-7.61934	-8.40134	-8.38786	-8.71674	-8.52605	-7.61124	-8.43868	6.56377e-06	0.000734205	0.0138732	0.043836	-0.914816	-0.827445	0.530412	0.563526
b2910	zapA	chr	+	3053633,	3053963,	-9.23415	-9.37049	-9.28904	-8.44339	-8.34866	-8.39333	-9.47288	-9.4179	-9.75997	-9.30214	-8.39121	-9.49132	0.00011048	0.00287556	0.00568736	0.0256186	-0.910935	-1.10011	0.53184	0.466481
b2587	kgtP	chr	-	2722469,	2723768,	-10.0896	-10.0684	-9.91199	-9.16473	-9.10688	-9.04977	-10.3478	-10.3653	-10.468	-10.0099	-9.11627	-10.3712	0.000504808	0.00506674	1.54449e-05	0.00151167	-0.893594	-1.25488	0.538272	0.419027
b4314	fimA	chr	+	4541137,	4541686,	-11.9213	-11.5395	-11.6413	-10.7046	-10.8962	-10.6874	-11.7006	-11.8473	-11.9409	-11.6707	-10.7826	-11.7854	0.00451098	0.0197877	0.000389148	0.00586364	-0.888078	-1.00276	0.540334	0.499046
b4397	creA	chr	+	4633543,	4634017,	-14.7589	-14.8529	-14.5401	-13.8684	-13.8475	-13.6589	-14.4649	-14.7542	-14.7989	-14.6985	-13.8163	-14.6093	0.00187405	0.0115089	0.00378658	0.0197659	-0.882212	-0.792916	0.542535	0.577176
b0506	allR	chr	+	532234,	533050,	-12.0708	-12.4246	-12.3113	-11.3448	-11.4129	-11.479	-12.6216	-12.7011	-12.9409	-12.2819	-11.4001	-12.6931	0.00796945	0.0277475	0.00184424	0.0136226	-0.881777	-1.293	0.542699	0.408101
b0956	ycbG	chr	+	1017707,	1018160,	-14.1918	-13.9403	-14.2182	-13.229	-13.2037	-13.3014	-14.7975	-14.3757	-14.629	-14.1092	-13.2314	-14.6093	0.00578307	0.0231619	0.00578883	0.0258271	-0.877807	-1.37788	0.544194	0.384784
b1702	pps	chr	-	1782757,	1785136,	-11.5596	-11.6503	-11.321	-10.6117	-10.6726	-10.5041	-11.3044	-11.3212	-11.307	-11.4895	-10.6164	-11.3108	0.00389406	0.0181824	0.00435367	0.0216504	-0.873054	-0.694385	0.54599	0.617973
b2916	argP	chr	+	3057774,	3058668,	-14.1214	-13.9631	-14.3437	-13.2113	-13.4381	-13.074	-14.3429	-13.8282	-13.9915	-14.1448	-13.2776	-14.0877	0.00418389	0.0190132	0.0150781	0.0462081	-0.867208	-0.810119	0.548207	0.570335
b3032	cpdA	chr	-	3174027,	3174855,	-11.9213	-12.1459	-12.2425	-11.4039	-11.2073	-11.1121	-11.923	-12.0761	-11.9162	-12.1202	-11.256	-11.9747	0.00264094	0.0142779	0.00387475	0.020159	-0.864267	-0.718782	0.549325	0.60761
b1761	gdhA	chr	+	1840394,	1841738,	-13.4914	-13.7906	-13.5252	-12.7744	-12.7814	-12.5929	-13.8244	-13.9062	-13.551	-13.6025	-12.7404	-13.8086	0.00259522	0.0142094	0.0027645	0.0168761	-0.862159	-1.06817	0.550129	0.476922
b3417	malP	chr	-	3548101,	3550495,	-12.0875	-12.1788	-12.3372	-11.4973	-11.4046	-11.1044	-12.7975	-12.6498	-12.8447	-12.2141	-11.3729	-12.7497	0.00615833	0.0241099	0.00190488	0.0138746	-0.841123	-1.37672	0.558209	0.385093
b2742	nlpD	chr	-	2865635,	2866775,	-10.9363	-10.7881	-10.9452	-10.079	-10.0321	-10.0702	-11.0055	-10.994	-10.7436	-10.8865	-10.0564	-10.9598	0.00211329	0.0121873	0.00842531	0.0323383	-0.830071	-0.903419	0.562501	0.534618
b1832	yebR	chr	-	1913654,	1914206,	-12.7589	-12.5653	-12.8772	-12.0142	-11.8031	-11.9447	-13.143	-12.9676	-13.2139	-12.732	-11.9043	-13.0877	0.00287141	0.0147771	0.000285687	0.00508578	-0.827767	-1.18346	0.563401	0.440295
b3149	diaA	chr	+	3293830,	3294421,	-12.4477	-12.4974	-12.8213	-11.7486	-11.7338	-11.931	-12.6216	-12.5215	-12.8447	-12.6025	-11.7755	-12.6151	0.00908117	0.0300098	0.0029168	0.0171554	-0.827056	-0.83959	0.563679	0.558802
b0145	dksA	chr	-	160148,	160604,	-9.03904	-9.05617	-9.18258	-8.3304	-8.26254	-8.27093	-9.14191	-9.15278	-9.05406	-9.10014	-8.28854	-9.13247	0.000697116	0.00627405	6.70348e-05	0.00291601	-0.811595	-0.843931	0.569752	0.557123
b3399	yrfG	chr	+	3526690,	3527359,	-13.1214	-13.0577	-13.1139	-12.229	-12.3718	-12.216	-13.3429	-13.8282	-13.4066	-13.096	-12.2877	-13.5082	0.00119637	0.00875474	0.00891364	0.0334742	-0.808348	-1.22047	0.571035	0.429143
b3397	nudE	chr	-	3523610,	3524171,	-12.2946	-12.4727	-12.0917	-11.644	-11.3397	-11.4301	-12.3527	-12.2306	-12.4066	-12.2671	-11.4616	-12.3155	0.0051618	0.0214983	0.0029332	0.0171554	-0.80542	-0.853881	0.572195	0.553294
b4392	slt	chr	+	4628755,	4630693,	-13.4052	-13.3858	-13.4108	-12.5354	-12.6978	-12.489	-13.4649	-13.4323	-13.551	-13.4006	-12.5953	-13.4654	0.00527866	0.0217536	0.000872727	0.0093609	-0.805307	-0.87008	0.57224	0.547117
b3609	secB	chr	-	3781683,	3782151,	-11.1606	-11.1855	-11.2425	-10.3569	-10.4025	-10.484	-11.2903	-11.2057	-11.1842	-11.2011	-10.401	-11.2438	0.000171246	0.00306708	9.03815e-05	0.00320797	-0.800124	-0.842782	0.5743	0.557567
b1619	hdhA	chr	-	1695296,	1696064,	-13.1387	-13.548	-13.2303	-12.603	-12.5437	-12.3014	-13.2856	-13.9468	-13.7114	-13.3069	-12.514	-13.5522	0.00746736	0.0268209	0.0137669	0.0437881	-0.792825	-1.03818	0.577213	0.48694
b0126	can	chr	-	142007,	142670,	-11.8991	-11.6184	-11.7242	-11.0028	-10.8617	-11.0151	-11.8313	-11.8187	-12.155	-11.7286	-10.941	-11.87	0.00266131	0.0142779	0.00526352	0.0245318	-0.787659	-0.928981	0.579283	0.525229
b2614	grpE	chr	-	2748136,	2748730,	-10.5451	-10.8318	-10.678	-9.8649	-9.95269	-9.92763	-10.9562	-10.7953	-11.1695	-10.6928	-9.91531	-10.925	0.00694522	0.025773	0.00756684	0.0304495	-0.777463	-1.00971	0.583392	0.496647
b2399	yfeD	chr	+	2516855,	2517227,	-13.3043	-13.7115	-13.6494	-12.8823	-12.6978	-12.8776	-13.6455	-13.5525	-13.477	-13.5719	-12.797	-13.5862	0.0150645	0.0413572	0.000855992	0.00924471	-0.774944	-0.789198	0.584411	0.578666
b0015	dnaJ	chr	+	14167,	15298,	-12.1562	-12.0762	-12.059	-11.3161	-11.2853	-11.4205	-12.6098	-12.6498	-12.5135	-12.0895	-11.3219	-12.6093	0.000205279	0.00324422	2.65882e-05	0.00196578	-0.767636	-1.28737	0.587379	0.409698
b3029	ygiN	chr	+	3171163,	3171478,	-12.1828	-12.3934	-12.1709	-11.5027	-11.5032	-11.4016	-12.5411	-12.8863	-12.7989	-12.2476	-11.4828	-12.6931	0.00287315	0.0147771	0.00346337	0.0185741	-0.764807	-1.21033	0.588532	0.432171
b0811	glnH	chr	-	846480,	847227,	-13.006	-12.9631	-13.0271	-12.2113	-12.2402	-12.3191	-13.4438	-13.7186	-14.0984	-12.9991	-12.2444	-13.6209	0.000175653	0.00306708	0.0137255	0.0437881	-0.754697	-1.3765	0.592671	0.385151
b3357	crp	chr	+	3484141,	3484774,	-11.3043	-11.561	-11.4994	-10.6831	-10.726	-10.7461	-11.3092	-11.2181	-11.5135	-11.4667	-10.714	-11.3037	0.00802209	0.0277475	0.0154797	0.0470128	-0.752692	-0.589664	0.593495	0.664498
b3927	glpF	chr	-	4115267,	4116113,	-11.583	-11.3667	-11.6055	-10.7015	-10.8447	-10.7106	-11.2395	-11.0649	-11.1124	-11.5125	-10.7649	-11.1562	0.00227048	0.0128825	0.00538123	0.0247234	-0.747666	-0.391311	0.595566	0.762437
b0212	gloB	chr	-	234026,	234782,	-14.9902	-14.8529	-14.9552	-14.2469	-14.1196	-14.1995	-15.0288	-14.9062	-15.2139	-14.9276	-14.1803	-15.0089	0.000190543	0.00308155	0.00467347	0.0225884	-0.747274	-0.82856	0.595728	0.563091
b1829	htpX	chr	-	1909718,	1910600,	-11.2564	-11.311	-11.5141	-10.5135	-10.6528	-10.801	-11.3478	-11.2244	-11.307	-11.3727	-10.627	-11.2967	0.00353523	0.0171931	0.00790158	0.0311542	-0.745609	-0.669616	0.596416	0.628674
b3931	hslU	chr	-	4118438,	4119770,	-11.7456	-11.5697	-11.8583	-10.9358	-11.0052	-11.0007	-12.1177	-12.1454	-12.2139	-11.7236	-10.9787	-12.1414	0.00881201	0.0294863	9.07098e-06	0.00144278	-0.744916	-1.16272	0.596703	0.44667
b1136	icd	chr	+	1194345,	1195596,	-10.4776	-10.3535	-10.3536	-9.64399	-9.66139	-9.69895	-10.6335	-10.671	-10.6799	-10.3846	-9.6622	-10.6536	0.0010757	0.00817744	1.59764e-06	0.000500382	-0.722381	-0.991353	0.606096	0.503006
b3179	rrmJ	chr	-	3325056,	3325686,	-11.8771	-11.8635	-11.9502	-11.3594	-11.106	-11.0516	-12.314	-12.3896	-12.0984	-11.9007	-11.1819	-12.3061	0.0117845	0.0356241	0.00108346	0.0101678	-0.71881	-1.12419	0.607598	0.458759
b0812	dps	chr	-	847630,	848134,	-12.4477	-12.3629	-12.3242	-11.6381	-11.6332	-11.7164	-12.4971	-12.4762	-12.2443	-12.3687	-11.6508	-12.4497	0.000161769	0.00306708	0.00679847	0.0286194	-0.717951	-0.798956	0.60796	0.574765
b3498	prlC	chr	-	3641162,	3643205,	-12.6809	-12.6005	-12.6739	-11.9763	-11.9227	-11.8776	-13.0132	-13.2432	-12.7545	-12.6498	-11.933	-13.0477	4.99842e-05	0.00169588	0.0139122	0.043836	-0.716717	-1.11472	0.608481	0.461782
b4171	miaA	chr	+	4397274,	4398225,	-10.7689	-10.6596	-10.8236	-10.073	-10.0711	-9.94127	-10.5217	-10.6838	-10.5605	-10.7508	-10.0457	-10.5833	0.000394018	0.00437543	0.00108488	0.0101678	-0.705121	-0.537659	0.613391	0.688888
b4252	yjgK	chr	+	4472884,	4473337,	-11.4694	-11.5872	-11.7242	-10.8006	-11.0305	-10.8776	-11.5694	-11.4108	-11.4413	-11.6072	-10.9134	-11.492	0.00236245	0.0133079	0.0033393	0.0180946	-0.693848	-0.578636	0.618203	0.669596
b1817	manX	chr	+	1900071,	1901043,	-11.8343	-11.4809	-11.6133	-10.9213	-10.9168	-10.9936	-11.945	-11.6838	-11.9915	-11.6181	-10.933	-11.8526	0.0166979	0.0443837	0.0073171	0.0299963	-0.685077	-0.91961	0.621972	0.528652
b0889	lrp	chr	+	931817,	932312,	-12.2284	-12.0577	-12.0271	-11.2559	-11.4725	-11.5609	-12.2577	-12.0427	-12.4413	-12.0874	-11.4056	-12.2015	0.00524092	0.0216551	0.00593453	0.0261788	-0.681785	-0.795935	0.623394	0.57597
b3570	bax	chr	-	3734375,	3735200,	-10.1474	-10.1855	-10.2348	-9.496	-9.48886	-9.65332	-10.5383	-10.4837	-10.4951	-10.1947	-9.52196	-10.5122	0.00211682	0.0121873	0.00151203	0.0126623	-0.672722	-0.990276	0.627322	0.503382
b3207	yrbL	chr	+	3346473,	3347106,	-11.6558	-11.7505	-11.6534	-10.9035	-11.1298	-10.9795	-11.3725	-11.3896	-11.459	-11.687	-11.0146	-11.391	0.00315949	0.0158582	0.0158421	0.0473631	-0.672451	-0.376459	0.62744	0.770326
b1795	yeaQ	chr	-	1877030,	1877279,	-11.9592	-12.0886	-12.2182	-11.3839	-11.4509	-11.4991	-12.3925	-12.6667	-12.3726	-12.1026	-11.4352	-12.4813	0.00568718	0.0229721	0.00424579	0.0215537	-0.667396	-1.0461	0.629642	0.484277
b0431	cyoB	chr	-	447873,	449865,	-9.62806	-9.67005	-9.66361	-8.98197	-9.00359	-8.9707	-10.2532	-10.2244	-10.0307	-9.65656	-8.98927	-10.2081	4.83152e-06	0.00073072	0.00299141	0.0172204	-0.66729	-1.21883	0.629688	0.429632
b3236	mdh	chr	-	3381351,	3382290,	-9.71448	-9.67356	-9.67182	-9.04622	-9.01462	-8.98299	-10.1472	-10.1132	-9.92237	-9.68333	-9.01982	-10.0999	1.48174e-05	0.00109636	0.00276957	0.0168761	-0.663511	-1.08011	0.63134	0.472993
b4077	gltP	chr	+	4292503,	4293817,	-12.3845	-12.7407	-12.6494	-12.0531	-11.9527	-11.7401	-12.4438	-12.6332	-12.5135	-12.6056	-11.9436	-12.5191	0.00917071	0.0301445	0.00835164	0.0321343	-0.662005	-0.575414	0.631999	0.671094
b2913	serA	chr	-	3055199,	3056432,	-12.7064	-12.5653	-12.6822	-12.0531	-11.9406	-12.1044	-12.9674	-12.7363	-13.0984	-12.6466	-12.0118	-12.8981	0.000720368	0.0064067	0.00569495	0.0256186	-0.634785	-0.886344	0.644037	0.540983
b2922	yggE	chr	-	3065361,	3066102,	-13.583	-13.2965	-13.3972	-12.8273	-12.76	-12.7763	-13.3824	-13.4911	-13.477	-13.406	-12.7874	-13.4342	0.0130618	0.0382334	0.000289019	0.00508578	-0.618652	-0.646781	0.651279	0.638704
b2520	yfhM	chr	-	2645347,	2650309,	-12.0462	-12.0215	-12.059	-11.4973	-11.3677	-11.4691	-11.9377	-11.8863	-11.7114	-12.0426	-11.4333	-11.884	0.00250102	0.0138886	0.0127368	0.0417277	-0.609234	-0.450636	0.655545	0.73172
b2463	maeB	chr	-	2574119,	2576399,	-11.0139	-11.1394	-10.9753	-10.476	-10.4424	-10.3689	-11.5982	-11.4688	-11.3395	-11.0405	-10.4399	-11.5109	0.00106375	0.00816583	0.00171481	0.0134313	-0.60058	-1.07099	0.659489	0.475991
b0932	pepN	chr	+	989844,	992457,	-11.497	-11.632	-11.3972	-10.8649	-11.0434	-10.7106	-11.4026	-11.3826	-11.5701	-11.5009	-10.9081	-11.4188	0.0076562	0.0273735	0.0110868	0.0386681	-0.592802	-0.510644	0.663054	0.701909
b0118	acnB	chr	+	131614,	134212,	-9.67141	-9.49844	-9.60251	-9.00085	-8.99342	-8.99539	-9.89773	-10.0073	-9.79889	-9.58256	-8.9965	-9.9205	0.00699555	0.0258984	0.00435453	0.0216504	-0.58606	-0.923992	0.66616	0.527049
b2412	zipA	chr	-	2528268,	2529255,	-10.2706	-10.2469	-10.1097	-9.59583	-9.65398	-9.56355	-9.97871	-10.0649	-9.97871	-10.197	-9.61481	-10.0089	0.0016785	0.010717	0.000514991	0.00689296	-0.582213	-0.394051	0.667938	0.76099
b1823	cspC	chr	-	1905249,	1905459,	-8.67456	-8.66247	-8.75713	-8.17542	-8.10815	-8.0853	-9.08986	-8.93784	-9.04067	-8.70228	-8.12776	-9.02672	0.000146859	0.00306708	0.000246797	0.0047232	-0.574521	-0.898961	0.671509	0.536273
b0864	artP	chr	-	902228,	902957,	-13.7858	-13.7505	-13.5859	-13.1594	-13.0661	-13.1671	-13.745	-13.6167	-13.7114	-13.6919	-13.1189	-13.6931	0.00355189	0.0172206	0.000428968	0.00616297	-0.573047	-0.574185	0.672196	0.671666
b4239	treC	chr	-	4461076,	4462732,	-9.53077	-9.73699	-9.68423	-9.04329	-9.12983	-9.13735	-9.81089	-9.82345	-9.73819	-9.66059	-9.09912	-9.80439	0.00467897	0.0202411	7.68232e-05	0.00297545	-0.561463	-0.70527	0.677615	0.613328
b1002	agp	chr	+	1064807,	1066049,	-13.3239	-13.6005	-13.3972	-12.9689	-12.9168	-12.8261	-14.267	-14.0761	-14.0984	-13.4444	-12.9173	-14.1711	0.0106654	0.0333374	0.000155726	0.00407331	-0.5271	-1.25387	0.693948	0.419323
b0437	clpP	chr	+	455900,	456524,	-11.9213	-11.8796	-12.1536	-11.4191	-11.4988	-11.5504	-12.021	-12.0761	-11.8682	-11.993	-11.4789	-12.0166	0.0159144	0.043122	0.0045916	0.0223306	-0.514132	-0.537659	0.700214	0.688888
b0438	clpX	chr	+	456649,	457924,	-10.4914	-10.3973	-10.2486	-9.8324	-9.97253	-9.74606	-10.4205	-10.5408	-10.5605	-10.3595	-9.87477	-10.4826	0.00551532	0.0224338	0.00207691	0.0146506	-0.484743	-0.607858	0.714625	0.65617
b2287	nuoB	chr	-	2401972,	2402635,	-10.8991	-11.133	-10.9602	-10.5162	-10.5324	-10.489	-11.0016	-10.9213	-11.1265	-11.0012	-10.518	-10.9898	0.0176736	0.0458987	0.0110553	0.038644	-0.483171	-0.471807	0.715403	0.721061
b2898	ygfZ	chr	+	3039334,	3040315,	-12.6434	-12.6924	-12.6739	-12.2559	-12.1401	-12.2666	-12.682	-12.6838	-12.477	-12.6723	-12.2056	-12.6506	0.00404076	0.0186662	0.0132596	0.0428135	-0.466706	-0.444949	0.723615	0.73461
b0726	sucA	chr	+	757928,	760730,	-9.43828	-9.38001	-9.30014	-8.88757	-8.95193	-8.89242	-10.3799	-10.4431	-10.1407	-9.36246	-8.91661	-10.3638	0.00198551	0.0118225	0.00295765	0.0171554	-0.44585	-1.44716	0.734152	0.366742
b3844	fre	chr	+	4024549,	4025251,	-12.1044	-12.1266	-12.3049	-11.6984	-11.7338	-11.8516	-12.143	-12.3079	-12.155	-12.1883	-11.7427	-12.2015	0.00772637	0.0274988	0.00353824	0.0189109	-0.445582	-0.458804	0.734288	0.727589
b3809	dapF	chr	+	3992784,	3993609,	-12.3742	-12.1788	-12.1709	-11.8964	-11.708	-11.7763	-12.1177	-12.4037	-12.307	-12.2236	-11.7874	-12.2415	0.00721752	0.0262242	0.0123511	0.041177	-0.436174	-0.454136	0.739092	0.729947
b0683	fur	chr	-	709422,	709869,	-10.3845	-10.2893	-10.3388	-9.96148	-9.91087	-9.92085	-10.5467	-10.5525	-10.6593	-10.3329	-9.93105	-10.5649	0.000784949	0.00686721	0.000880164	0.00937644	-0.401896	-0.633806	0.756863	0.644474
b4000	hupA	chr	+	4198303,	4198576,	-10.1172	-10.109	-10.1694	-9.8324	-9.64906	-9.80097	-10.2832	-10.3482	-10.4066	-10.1347	-9.7427	-10.3239	0.014966	0.0413346	0.00197522	0.0141242	-0.391995	-0.581149	0.762075	0.668431
b4221	ytfN	chr	+	4442134,	4445914,	-11.6809	-11.4565	-11.4598	-11.2157	-11.0241	-11.2243	-11.6697	-11.7632	-11.551	-11.5125	-11.1295	-11.6839	0.0193623	0.0491432	0.00489043	0.0234202	-0.383079	-0.554408	0.766799	0.680936
b1603	pntA	chr	-	1674394,	1675927,	-11.4423	-11.409	-11.4776	-10.999	-11.0993	-11.1751	-11.508	-11.4323	-11.3559	-11.4444	-11.076	-11.4575	0.011739	0.0355577	0.00758321	0.0304495	-0.368402	-0.381577	0.77464	0.767598
b4359	mdoB	chr	-	4595172,	4597464,	-11.0502	-11.0917	-10.9452	-10.6381	-10.7338	-10.631	-10.845	-10.8912	-10.9915	-11.0217	-10.6782	-10.8822	0.00347521	0.0170068	0.0131786	0.042728	-0.34355	-0.204042	0.7881	0.868115
b3928	yiiU	chr	+	4116537,	4116783,	-11.1214	-10.946	-11.1111	-10.755	-10.7654	-10.6703	-11.2762	-11.3212	-11.477	-11.0542	-10.7427	-11.3203	0.0139507	0.0396091	0.00295338	0.0171554	-0.311462	-0.577573	0.805825	0.67009
b3414	gntY	chr	+	3543645,	3544221,	-12.4694	-12.409	-12.5859	-12.151	-12.161	-12.3014	-13.0132	-13.0537	-13.2139	-12.4923	-12.1834	-13.0557	0.0164214	0.0439123	0.000449231	0.00639526	-0.308879	-0.872215	0.807269	0.546308
b0440	hupB	chr	+	460674,	460947,	-9.56539	-9.65148	-9.68423	-9.44468	-9.31613	-9.31465	-9.78418	-9.70542	-9.70086	-9.64138	-9.36134	-9.74327	0.00863468	0.0291311	0.00356122	0.0189689	-0.280034	-0.381927	0.823572	0.767412
b2696	csrA	chr	-	2816982,	2817168,	-10.2307	-10.2451	-10.3602	-9.98197	-10.013	-10.0553	-10.8381	-10.8	-10.9285	-10.2856	-10.0097	-10.8372	0.0108242	0.0336993	0.000233823	0.00465325	-0.275903	-0.827553	0.825933	0.563484
b0430	cyoC	chr	-	447269,	447884,	-10.5336	-10.4891	-10.3955	-10.2424	-10.1663	-10.1671	-11.3675	-11.3346	-11.3232	-10.4625	-10.1937	-11.3491	0.00729035	0.0264275	3.09236e-05	0.00196578	-0.268822	-1.15544	0.829997	0.44893
b3178	hflB	chr	-	3323022,	3324957,	-9.50673	-9.58169	-9.5289	-9.32207	-9.24852	-9.32579	-9.49979	-9.49868	-9.50887	-9.54118	-9.28981	-9.50073	0.00213417	0.0122422	0.0137851	0.0437881	-0.251368	-0.210917	0.8401	0.863988
b2095	gatZ	chr	-	2173080,	2174343,	-8.91757	-8.92075	-8.99517	-8.75422	-8.68575	-8.72084	-9.50797	-9.46693	-9.48601	-8.94882	-8.71717	-9.48998	0.00274551	0.0144763	2.95638e-05	0.00196578	-0.231651	-0.77281	0.85166	0.585276
b3316	rpsS	chr	-	3448269,	3448548,	-8.78414	-8.81622	-8.8026	-8.60663	-8.57371	-8.5426	-8.91846	-8.96759	-9.13	-8.80251	-8.57948	-8.9654	0.00175445	0.0109461	0.0154177	0.046973	-0.223026	-0.385915	0.856766	0.765294
b0623	cspE	chr	+	656514,	656724,	-4.84145	-4.81897	-4.88188	-4.7136	-4.66593	-4.73664	-5.39423	-5.31	-5.62928	-4.84934	-4.69671	-5.39521	0.00721138	0.0262242	0.0131559	0.042728	-0.152626	-0.698496	0.899612	0.616214
b0169	rpsB	chr	+	189873,	190599,	-7.97654	-7.94705	-8.04361	-8.23509	-8.12427	-8.18524	-7.84285	-7.92066	-7.87408	-7.99214	-8.1756	-7.87476	0.0112929	0.0348811	0.002324	0.015185	0.183463	0.300842	1.13561	1.23186
b0170	tsf	chr	+	190856,	191708,	-8.31962	-8.37239	-8.34251	-8.50541	-8.55749	-8.55697	-8.08884	-8.06558	-8.21393	-8.34682	-8.5382	-8.09814	0.00114081	0.00854324	0.00619436	0.0269455	0.191382	0.440063	1.14186	1.35666
b0436	tig	chr	+	454356,	455655,	-8.02642	-8.00223	-8.0205	-8.20961	-8.23142	-8.19644	-7.86455	-7.89807	-7.886	-8.01565	-8.21663	-7.87958	0.000187065	0.00308155	2.0364e-05	0.00177167	0.200974	0.337048	1.14947	1.26317
b3310	rplN	chr	-	3445799,	3446171,	-7.90597	-7.96772	-8.0107	-8.14411	-8.16627	-8.24109	-7.69321	-7.70924	-7.84324	-7.96813	-8.17229	-7.72012	0.00626109	0.0241499	0.00301045	0.0172204	0.204152	0.452169	1.15201	1.3681
b3980	tufB	chr	+	4173966,	4175151,	-7.05177	-7.0621	-7.0807	-7.27735	-7.28312	-7.24744	-6.9058	-6.92668	-6.88301	-7.06672	-7.27404	-6.90982	0.000190358	0.00308155	3.04695e-05	0.00196578	0.207316	0.364216	1.15454	1.28718
b3339	tufA	chr	-	3468166,	3469351,	-6.08096	-6.09603	-6.12624	-6.27605	-6.33304	-6.33336	-5.96564	-5.96546	-5.86926	-6.10393	-6.31208	-5.95098	0.00130687	0.00930254	0.00140381	0.0121594	0.208148	0.361098	1.1552	1.2844
b3314	rpsC	chr	-	3447203,	3447905,	-8.01192	-8.01442	-8.0107	-8.25196	-8.21043	-8.21083	-7.83254	-7.89124	-7.86815	-8.01231	-8.2255	-7.85847	0.00400486	0.0185551	0.000108147	0.00360337	0.213191	0.367032	1.15925	1.2897
b0159	mtn	chr	-	178454,	179153,	-11.4369	-11.5395	-11.5667	-11.8006	-11.7814	-11.6817	-11.3975	-11.3212	-11.3895	-11.5228	-11.7684	-11.3687	0.011405	0.0350869	0.00179265	0.0136226	0.245649	0.39971	1.18563	1.31924
b0741	pal	chr	+	778289,	778811,	-10.24	-10.2023	-10.1322	-10.4551	-10.4087	-10.489	-10.143	-10.0399	-10.0915	-10.1836	-10.4408	-10.0979	0.00362763	0.0173197	0.00088894	0.00937936	0.257183	0.342945	1.19514	1.26834
b3705	yidC	chr	+	3883098,	3884745,	-8.84576	-8.90348	-8.95517	-9.17113	-9.17067	-9.16309	-8.80417	-8.79766	-8.74361	-8.90831	-9.16936	-8.79279	0.0132769	0.038646	0.00210739	0.0146674	0.261052	0.376579	1.19835	1.29826
b3298	rpsM	chr	-	3440136,	3440493,	-8.14798	-8.12216	-8.17819	-8.40327	-8.43282	-8.43495	-8.07511	-8.06908	-8.08981	-8.15074	-8.4224	-8.07511	0.000385078	0.00433449	4.55566e-05	0.0026191	0.271661	0.347289	1.2072	1.27217
b3388	damX	chr	-	3514041,	3515328,	-10.9553	-11.0669	-10.9303	-11.1722	-11.3318	-11.2666	-10.8485	-10.7861	-10.88	-10.9829	-11.2593	-10.8304	0.012306	0.0365676	0.00328768	0.0180649	0.276344	0.428827	1.21112	1.34614
b1713	pheT	chr	-	1793580,	1795968,	-9.35515	-9.42464	-9.40999	-9.61606	-9.71308	-9.71937	-9.27391	-9.3516	-9.21017	-9.40064	-9.67817	-9.2914	0.00360989	0.0173197	0.00182824	0.0136226	0.277525	0.386766	1.21211	1.30746
b3302	rpmD	chr	-	3442564,	3442744,	-9.69838	-9.64917	-9.67698	-9.96333	-9.92567	-10.0296	-9.43862	-9.4179	-9.34356	-9.67272	-9.95903	-9.41688	0.00372279	0.017613	0.0001685	0.00422765	0.286304	0.542148	1.21951	1.45614
b3295	rpoA	chr	-	3438061,	3439051,	-7.04565	-7.05084	-7.04528	-7.32236	-7.32738	-7.37934	-6.81977	-6.81754	-6.79116	-7.0473	-7.33547	-6.81473	0.00350434	0.017096	0.000136037	0.00393024	0.288165	0.520732	1.22109	1.43468
b3256	accC	chr	+	3403938,	3405288,	-9.21684	-9.25297	-9.28039	-9.51217	-9.54373	-9.6091	-9.18713	-9.1292	-9.11239	-9.25424	-9.5445	-9.15512	0.00170952	0.0107955	0.000457387	0.00639526	0.290258	0.389376	1.22286	1.30983
b1413	hrpA	chr	+	1481084,	1484987,	-11.6558	-11.726	-11.6213	-11.9838	-11.9466	-11.9585	-11.6882	-11.6752	-11.5701	-11.6658	-11.9624	-11.6656	0.00571589	0.0229721	0.00900975	0.0336737	0.296562	0.296791	1.22821	1.22841
b3986	rplL	chr	+	4178582,	4178948,	-7.45645	-7.45049	-7.48938	-7.77358	-7.74193	-7.79941	-7.33289	-7.2069	-7.33434	-7.46726	-7.76443	-7.28689	0.000210213	0.00325935	0.00328	0.0180649	0.297168	0.477541	1.22873	1.39237
b0911	rpsA	chr	+	961217,	962891,	-6.8036	-6.79744	-6.87806	-7.13731	-7.12086	-7.12708	-6.58262	-6.61361	-6.66703	-6.83034	-7.12804	-6.6058	0.00589916	0.0234469	0.00171677	0.0134313	0.297704	0.522236	1.22919	1.43618
b0642	leuS	chr	-	671423,	674006,	-10.3438	-10.38	-10.4212	-10.671	-10.6851	-10.7401	-10.2509	-10.3722	-10.1916	-10.3866	-10.6904	-10.2838	0.000506124	0.00506674	0.00785265	0.0311323	0.303818	0.406561	1.23441	1.32552
b3732	atpD	chr	-	3914015,	3915398,	-8.6434	-8.61055	-8.62127	-8.90347	-8.98875	-8.86291	-8.63648	-8.64985	-8.56048	-8.62321	-8.93237	-8.62976	0.0114898	0.0351426	0.00367699	0.0193227	0.309168	0.302614	1.23899	1.23338
b3389	aroB	chr	-	3515419,	3516508,	-10.852	-10.9069	-10.8466	-11.288	-11.1162	-11.1913	-10.7941	-10.9417	-10.7545	-10.8687	-11.1913	-10.8389	0.0129466	0.0379669	0.00858686	0.0326384	0.322638	0.352384	1.25062	1.27667
b3168	infB	chr	-	3311363,	3314036,	-9.59192	-9.61055	-9.55714	-9.92135	-9.94815	-9.8166	-9.46623	-9.5196	-9.29506	-9.58447	-9.91205	-9.4582	0.00891115	0.0297545	0.00753781	0.0304495	0.327576	0.453853	1.2549	1.36969
b1092	fabD	chr	+	1148950,	1149880,	-10.5654	-10.5078	-10.3536	-10.7202	-10.8335	-10.8452	-10.2103	-10.3757	-10.1124	-10.459	-10.7934	-10.2517	0.0177507	0.0459838	0.00721082	0.0297162	0.334364	0.541668	1.26082	1.45565
b4595	yciY	chr	+	1306811,	1306985,	-10.8343	-10.6526	-10.7697	-11.1467	-11.0052	-11.1671	-10.7547	-10.8425	-10.9041	-10.7439	-11.0862	-10.8069	0.00862543	0.0291311	0.0159389	0.0473631	0.342285	0.279318	1.26776	1.21362
b3296	rpsD	chr	-	3439076,	3439697,	-7.80166	-7.87425	-7.90532	-8.27189	-8.25598	-8.29044	-7.75106	-7.77176	-7.6956	-7.86717	-8.2684	-7.75007	0.00282383	0.0146436	0.000390015	0.00586364	0.401231	0.518331	1.32063	1.4323
b2029	gnd	chr	-	2097885,	2099292,	-9.32147	-9.27856	-9.25396	-9.68464	-9.69776	-9.65613	-9.22706	-9.24639	-9.1805	-9.27969	-9.68483	-9.22694	0.000228921	0.00338198	0.000128837	0.00387997	0.405137	0.457885	1.32421	1.37353
b3304	rplR	chr	-	3443265,	3443619,	-9.19409	-9.21839	-9.20251	-9.64548	-9.62713	-9.55828	-9.12086	-9.04959	-9.09499	-9.20581	-9.62012	-9.09127	0.00257165	0.0141305	0.000146241	0.00401778	0.414303	0.528851	1.33265	1.44278
b3340	fusA	chr	-	3469421,	3471536,	-6.76201	-6.77654	-6.75959	-7.18564	-7.18217	-7.17362	-6.5619	-6.57229	-6.74564	-6.76608	-7.18177	-6.59128	1.56616e-06	0.000431497	0.0111609	0.0387537	0.415694	0.590494	1.33394	1.50576
b3985	rplJ	chr	+	4178018,	4178516,	-6.97145	-6.93946	-7.00324	-7.37867	-7.40275	-7.38982	-6.67757	-6.63836	-6.60906	-6.97263	-7.39143	-6.65328	0.000597661	0.00579383	0.000198311	0.00445786	0.418805	0.738158	1.33682	1.66804
b4147	efp	chr	+	4373721,	4374288,	-9.68721	-9.62406	-9.60153	-10.02	-10.101	-10.0665	-9.61131	-9.64566	-9.69036	-9.63108	-10.0643	-9.63493	0.000269038	0.00367207	0.000228511	0.00465325	0.433263	0.42941	1.35028	1.34668
b1288	fabI	chr	-	1348274,	1349063,	-10.0139	-9.95592	-9.87125	-10.4525	-10.3477	-10.2796	-9.79081	-9.78379	-9.78208	-9.93633	-10.3712	-9.78702	0.00358241	0.0172658	0.00744715	0.0302131	0.434827	0.584138	1.35175	1.49914
b3729	glmS	chr	-	3909861,	3911691,	-10.075	-10.023	-10.168	-10.5354	-10.5878	-10.4301	-10.0426	-10.1813	-9.94091	-10.0922	-10.5369	-10.0746	0.00247281	0.0137808	0.00777671	0.0309095	0.444709	0.462341	1.36104	1.37778
b3938	metJ	chr	-	4126100,	4126418,	-11.9902	-12.1266	-12.0917	-12.5135	-12.4988	-12.6146	-11.9825	-12.0317	-11.7328	-12.0766	-12.5259	-11.9598	0.00104924	0.0081187	0.0121473	0.0410857	0.44938	0.566121	1.36545	1.48054
b3303	rpsE	chr	-	3442747,	3443251,	-8.47621	-8.50832	-8.53966	-8.96611	-8.94212	-9.00431	-8.41153	-8.42955	-8.41735	-8.51217	-8.96273	-8.41879	5.64582e-05	0.00176827	0.000469706	0.00646777	0.450559	0.543941	1.36657	1.45795
b3169	nusA	chr	-	3314060,	3315548,	-10.4396	-10.5806	-10.7306	-11.069	-11.106	-10.8974	-10.5383	-10.4874	-10.486	-10.5987	-11.0499	-10.5122	0.016165	0.0434208	0.0107418	0.0382312	0.45126	0.537702	1.36723	1.45166
b3706	mnmE	chr	+	3884850,	3886215,	-13.0219	-13.0455	-12.8963	-13.3594	-13.4212	-13.6146	-12.7842	-12.9676	-12.629	-12.9789	-13.4333	-12.822	0.0102894	0.0326839	0.00666169	0.0281952	0.45444	0.611351	1.37025	1.52769
b3987	rpoB	chr	+	4179267,	4183296,	-8.41376	-8.39876	-8.37816	-8.82565	-8.87884	-8.85482	-8.22425	-8.26715	-8.27729	-8.39443	-8.85461	-8.24717	4.78467e-05	0.00169588	1.20646e-05	0.00144278	0.46018	0.607446	1.37571	1.52356
b3306	rpsH	chr	-	3444174,	3444567,	-9.01791	-8.98542	-9.07457	-9.52168	-9.46813	-9.47904	-8.98346	-8.85937	-8.91319	-9.02846	-9.48954	-8.92773	0.000331819	0.00396868	0.00103783	0.0100646	0.461082	0.561812	1.37657	1.47612
b1717	rpmI	chr	-	1797825,	1798023,	-9.13006	-9.06536	-9.11038	-9.64845	-9.54715	-9.43978	-9.15255	-9.20267	-9.27141	-9.09959	-9.56124	-9.18732	0.0118834	0.0357872	0.014627	0.0454483	0.461653	0.373921	1.37712	1.29587
b3321	rpsJ	chr	-	3450980,	3451292,	-8.97848	-8.9467	-8.9627	-9.42415	-9.43918	-9.38982	-8.9058	-8.91498	-8.71143	-8.96117	-9.42402	-8.8787	5.08981e-05	0.00169588	0.0103414	0.0372292	0.462849	0.545319	1.37826	1.45934
b2231	gyrA	chr	-	2334814,	2337442,	-9.29944	-9.30917	-9.24934	-9.65891	-9.81684	-9.80097	-9.23834	-9.32624	-9.21769	-9.28279	-9.75433	-9.26596	0.00572102	0.0229721	0.00210134	0.0146674	0.471539	0.488367	1.38659	1.40286
b2532	trmJ	chr	-	2660604,	2661345,	-10.6589	-10.8292	-10.6926	-11.2379	-11.1786	-11.1913	-10.7547	-10.7274	-10.5135	-10.7295	-11.2024	-10.707	0.0066153	0.0250837	0.0155208	0.0470128	0.472937	0.495399	1.38793	1.40971
b3860	dsbA	chr	+	4041440,	4042067,	-10.21	-10.2768	-10.2563	-10.7328	-10.7312	-10.6989	-10.2509	-10.2948	-10.3395	-10.2512	-10.7254	-10.2792	0.000179806	0.00306708	0.00102654	0.0100473	0.474237	0.446234	1.38918	1.36248
b1049	mdoH	chr	+	1110085,	1112629,	-10.8168	-10.7679	-10.7115	-11.1384	-11.2663	-11.3828	-10.6882	-10.7861	-10.7009	-10.7576	-11.2395	-10.7242	0.0100675	0.0321748	0.00812663	0.0315384	0.481871	0.515275	1.39655	1.42927
b0680	glnS	chr	+	705315,	706980,	-10.6099	-10.585	-10.7919	-11.2069	-11.0993	-11.1751	-10.7322	-10.6881	-10.619	-10.6699	-11.1523	-10.6993	0.00702479	0.0259453	0.000470834	0.00646777	0.482463	0.453083	1.39713	1.36896
b3816	corA	chr	+	3999448,	4000399,	-12.2284	-12.2609	-12.3769	-12.6984	-12.8817	-12.7282	-12.3625	-12.2432	-12.0175	-12.2968	-12.7826	-12.2642	0.00319939	0.0158725	0.015041	0.0461846	0.485808	0.518375	1.40037	1.43234
b1245	oppC	chr	+	1301857,	1302766,	-9.64032	-9.63885	-9.62625	-10.1342	-10.1419	-10.059	-9.48897	-9.62284	-9.64407	-9.63424	-10.1227	-9.55782	0.00244505	0.0136748	0.00217416	0.0148032	0.488423	0.564837	1.40291	1.47922
b3297	rpsK	chr	-	3439730,	3440120,	-8.40785	-8.40507	-8.37774	-8.84174	-8.91603	-8.91917	-8.48695	-8.42955	-8.47922	-8.39494	-8.88912	-8.46509	0.000869046	0.00725183	0.000300424	0.00517485	0.494184	0.424031	1.40852	1.34167
b3305	rplF	chr	-	3443628,	3444162,	-8.27715	-8.38001	-8.25936	-8.73908	-8.81408	-8.90406	-8.16273	-8.16772	-8.16771	-8.30481	-8.803	-8.16524	0.00134837	0.00944772	0.00524694	0.0245318	0.498181	0.637755	1.41243	1.55591
b3255	accB	chr	+	3403457,	3403928,	-11.3141	-11.2893	-11.3242	-11.7233	-11.8991	-11.801	-11.021	-10.9012	-10.892	-11.3094	-11.8139	-10.958	0.00817983	0.028153	0.000237714	0.00465325	0.504515	0.855932	1.41865	1.80993
b3317	rplB	chr	-	3448564,	3449386,	-7.89354	-7.89254	-7.91351	-8.43117	-8.40456	-8.38399	-7.80879	-7.78898	-7.66961	-7.90104	-8.41016	-7.78045	7.0101e-05	0.00203293	0.00226496	0.015063	0.509124	0.629709	1.42319	1.54725
b2400	gltX	chr	-	2517278,	2518694,	-10.1761	-10.133	-10.135	-10.6322	-10.6952	-10.6477	-10.1115	-10.1336	-9.892	-10.1448	-10.6628	-10.0847	5.08409e-05	0.00169588	0.0117473	0.0401665	0.517945	0.578071	1.43191	1.49285
b0628	lipA	chr	-	658473,	659439,	-11.1044	-11.0486	-11.0944	-11.7233	-11.4725	-11.7401	-11.1136	-11.2559	-11.0846	-11.0809	-11.61	-11.1583	0.0195766	0.0494259	0.0131026	0.0426584	0.529177	0.451741	1.44311	1.36769
b3308	rplE	chr	-	3444920,	3445460,	-8.16227	-8.1134	-8.10516	-8.69152	-8.61149	-8.67881	-8.15736	-8.15949	-8.15143	-8.12258	-8.6532	-8.15724	0.000123998	0.00293329	0.00222951	0.015063	0.530621	0.495953	1.44455	1.41025
b4177	purA	chr	+	4402709,	4404008,	-10.0646	-10.098	-10.187	-10.5973	-10.7208	-10.631	-10.0055	-9.96498	-9.99799	-10.1235	-10.6573	-9.9898	0.000506204	0.00506674	0.00133325	0.011861	0.533736	0.667482	1.44767	1.5883
b1273	yciN	chr	-	1328440,	1328692,	-12.0791	-12.1266	-12.1251	-12.7108	-12.6876	-12.4691	-12.2214	-12.2432	-12.0984	-12.1136	-12.6508	-12.2103	0.0185675	0.0475886	0.0139085	0.043836	0.537164	0.440448	1.45112	1.35703
b0957	ompA	chr	-	1018235,	1019276,	-6.86338	-6.81622	-6.83753	-7.35145	-7.38449	-7.40924	-6.74621	-6.75616	-6.68255	-6.83669	-7.3771	-6.74018	2.08783e-05	0.00109636	4.44382e-05	0.0026191	0.540402	0.636914	1.45438	1.555
b1095	fabF	chr	+	1151161,	1152403,	-9.3227	-9.31921	-9.26556	-9.75984	-9.8461	-9.99006	-9.21363	-9.28658	-9.06418	-9.29869	-9.8403	-9.21583	0.00976573	0.0314674	0.00195484	0.0140604	0.541607	0.624467	1.45559	1.54164
b0194	proS	chr	-	217056,	218775,	-9.81506	-9.81493	-9.81903	-10.2379	-10.4856	-10.328	-9.71473	-9.83056	-9.6956	-9.81658	-10.3605	-9.75207	0.0178398	0.0461008	0.00434487	0.0216504	0.543875	0.60838	1.45788	1.52455
b3185	rpmA	chr	-	3330883,	3331141,	-8.57418	-8.56857	-8.42552	-9.05015	-9.10015	-8.97771	-8.53695	-8.52633	-8.51812	-8.51181	-9.05748	-8.53037	0.00145844	0.00993008	0.00400132	0.020728	0.545673	0.527113	1.4597	1.44104
b2276	nuoN	chr	-	2388069,	2389527,	-9.00597	-9.11062	-9.09098	-9.53126	-9.67383	-9.6874	-9.12191	-9.17978	-8.99476	-9.07522	-9.62278	-9.12258	0.0014479	0.00992239	0.00204752	0.0145746	0.547557	0.500198	1.46161	1.41441
b4515	ybgT	chr	+	773418,	773532,	-13.0543	-12.7805	-12.9353	-13.3989	-13.5807	-13.3014	-12.5524	-12.9468	-12.8447	-12.9083	-13.4559	-12.7242	0.011539	0.0351556	0.0141905	0.0443558	0.547622	0.731689	1.46167	1.66058
b0180	fabZ	chr	+	202100,	202556,	-10.8484	-10.7654	-10.7157	-11.265	-11.3799	-11.2666	-10.9267	-10.7363	-10.7545	-10.7663	-11.315	-10.8304	0.000628827	0.00590546	0.00416724	0.0213265	0.54869	0.48455	1.46276	1.39915
b3307	rpsN	chr	-	3444600,	3444906,	-9.26702	-9.32471	-9.20921	-9.90881	-9.74029	-9.81974	-9.10115	-9.21038	-8.95969	-9.26339	-9.81512	-9.11688	0.00124888	0.0090544	0.00195371	0.0140604	0.551733	0.698236	1.46585	1.62252
b4203	rplI	chr	+	4424130,	4424580,	-8.95725	-8.94953	-8.86771	-9.48134	-9.50766	-9.3992	-8.97777	-9.01542	-9.18418	-8.91863	-9.47649	-9.01993	0.000269661	0.00367207	0.0110498	0.038644	0.557853	0.456553	1.47208	1.37226
b3183	obgE	chr	-	3328603,	3329776,	-11.6872	-11.8959	-12.0429	-12.5027	-12.3881	-12.5092	-11.7975	-11.6498	-11.6904	-11.8931	-12.4521	-11.7274	0.0187329	0.0479341	0.000233347	0.00465325	0.559057	0.724744	1.47331	1.65261
b3065	rpsU	chr	+	3208802,	3209018,	-8.45239	-8.40507	-8.48214	-8.99895	-9.01541	-9.02959	-8.58369	-8.64566	-8.54859	-8.44732	-9.01212	-8.60019	0.000412924	0.00452195	0.0023212	0.015185	0.564802	0.411927	1.47918	1.33046
b0470	dnaX	chr	+	491315,	493247,	-11.2009	-10.9861	-10.9402	-11.4293	-11.6776	-11.6932	-11.0171	-10.9781	-10.966	-11.0197	-11.5849	-10.9955	0.00903639	0.0300098	0.0164425	0.0483094	0.565271	0.589428	1.47967	1.50465
b3342	rpsL	chr	-	3472199,	3472574,	-8.83516	-8.79632	-8.76315	-9.32088	-9.37685	-9.38982	-8.69671	-8.68272	-8.6956	-8.79298	-9.35868	-8.69154	4.51244e-05	0.00169588	0.000631987	0.00773196	0.565696	0.667135	1.4801	1.58792
b2235	nrdB	chr	+	2345405,	2346536,	-11.5422	-11.7456	-11.6373	-12.2025	-12.2109	-12.2666	-11.8109	-11.8093	-11.6904	-11.6482	-12.2184	-11.792	0.00542897	0.0221978	0.00213549	0.0147321	0.570284	0.426475	1.48482	1.34395
b3320	rplC	chr	-	3450318,	3450948,	-8.2605	-8.18504	-8.14317	-8.79897	-8.72533	-8.76261	-8.10683	-8.138	-8.09326	-8.18727	-8.759	-8.11585	0.000441355	0.00473398	5.59805e-05	0.00273955	0.571736	0.643154	1.48631	1.56174
b3916	pfkA	chr	+	4105574,	4106537,	-11.6434	-11.4365	-11.5743	-12.077	-12.1128	-12.1995	-11.4917	-11.4323	-11.2911	-11.5419	-12.1159	-11.4393	0.00278352	0.01453	0.00121647	0.0110116	0.573976	0.676569	1.48862	1.59833
b0125	hpt	chr	+	141430,	141967,	-11.7324	-11.8529	-11.9703	-12.3594	-12.4381	-12.6146	-11.9013	-11.9062	-11.7989	-11.865	-12.4408	-11.8875	0.00383757	0.018047	0.00665905	0.0281952	0.575865	0.553335	1.49057	1.46747
b2296	ackA	chr	+	2411491,	2412694,	-11.5889	-11.4365	-11.6453	-12.069	-12.2625	-12.0007	-11.1687	-11.1692	-10.9787	-11.5553	-12.137	-11.1393	0.00604062	0.0238277	0.000703246	0.00803857	0.581705	0.997764	1.49662	1.9969
b3341	rpsG	chr	-	3471563,	3472103,	-8.84045	-8.74497	-8.73385	-9.26161	-9.44024	-9.30801	-8.74742	-8.73071	-8.7328	-8.76456	-9.34719	-8.73929	0.00184664	0.011429	0.00742217	0.0302131	0.582629	0.607904	1.49758	1.52404
b4238	nrdD	chr	-	4458544,	4460683,	-11.8273	-11.5566	-11.5898	-12.2113	-12.2929	-12.074	-11.3284	-11.4251	-11.4951	-11.6354	-12.2184	-11.386	0.0089823	0.0299283	0.000892416	0.00937936	0.583009	0.832406	1.49797	1.78065
b3649	rpoZ	chr	+	3820128,	3820404,	-11.4859	-11.3554	-11.289	-11.8546	-12.0926	-11.8908	-11.2036	-11.5447	-11.2753	-11.3608	-11.9624	-11.3274	0.00449923	0.0197877	0.0115215	0.0397018	0.60157	0.63496	1.51737	1.55289
b1123	potD	chr	-	1181005,	1182052,	-11.3239	-11.4565	-11.4776	-12.069	-11.9649	-12.1512	-11.3925	-11.4323	-11.044	-11.4292	-12.0371	-11.3491	0.000937442	0.00771378	0.0134515	0.0431662	0.607919	0.687975	1.52406	1.61102
b3319	rplD	chr	-	3449702,	3450308,	-8.33572	-8.31738	-8.3421	-8.93037	-8.94287	-8.95851	-8.25487	-8.29639	-8.16045	-8.33183	-8.94131	-8.25511	6.9298e-07	0.000431497	0.0023516	0.015185	0.609488	0.686204	1.52572	1.60904
b2606	rplS	chr	-	2742204,	2742552,	-8.33946	-8.3648	-8.32096	-8.95594	-8.97946	-8.88416	-8.32715	-8.32289	-8.48148	-8.34084	-8.95198	-8.34731	0.00052037	0.00512515	0.00217121	0.0148032	0.611148	0.604674	1.52747	1.52063
b1864	yebC	chr	-	1945434,	1946175,	-11.0462	-10.9375	-10.8443	-11.6088	-11.4856	-11.5297	-10.845	-10.9624	-10.639	-10.9266	-11.538	-10.8526	0.00207687	0.0121734	0.00915025	0.0339406	0.611345	0.685307	1.52768	1.60804
b0211	mltD	chr	-	232596,	233955,	-8.63724	-8.65378	-8.58933	-9.20796	-9.26161	-9.26448	-8.62015	-8.5933	-8.50657	-8.62379	-9.24238	-8.59334	2.1003e-05	0.00109636	0.000375133	0.0057594	0.618589	0.649039	1.53537	1.56812
b4466	yghJ	chr	-	3112571,	3117134,	-12.1301	-11.9291	-11.8305	-12.3594	-12.7286	-12.5929	-11.8799	-11.8282	-11.7114	-11.9373	-12.5582	-11.8355	0.013888	0.0396091	0.00953287	0.0348796	0.620882	0.722656	1.53781	1.65022
b3637	rpmB	chr	-	3809460,	3809697,	-8.36021	-8.40021	-8.32824	-8.96704	-8.96334	-9.06089	-8.53625	-8.38786	-8.35595	-8.36115	-8.98311	-8.4546	0.000207166	0.00324422	0.00233596	0.015185	0.621953	0.528507	1.53896	1.44244
b2113	mrp	chr	-	2191080,	2192190,	-11.3896	-11.2929	-11.4421	-12.069	-11.9527	-12.0296	-11.3332	-11.4395	-11.229	-11.3753	-12.009	-11.354	0.000433843	0.00471804	0.00183594	0.0136226	0.633684	0.654986	1.55152	1.5746
b0171	pyrH	chr	+	191854,	192580,	-12.006	-11.8689	-12.0972	-12.7874	-12.5346	-12.5504	-11.8042	-11.7452	-11.7328	-11.991	-12.6249	-11.7723	0.00438868	0.0195343	0.00590587	0.026131	0.633911	0.852624	1.55177	1.80578
b0633	rlpA	chr	-	663324,	664413,	-12.4369	-12.3554	-12.1536	-13.0931	-12.7707	-13.1044	-12.2856	-12.1935	-12.155	-12.2918	-12.9436	-12.2325	0.00955471	0.0309786	0.0118117	0.0402064	0.651833	0.711109	1.57116	1.63706
b3165	rpsO	chr	-	3309436,	3309706,	-8.33012	-8.35773	-8.34579	-9.04035	-8.99186	-8.95159	-8.48897	-8.39751	-8.37893	-8.34585	-9.00134	-8.43933	0.000657756	0.00604221	0.000273693	0.00498375	0.655495	0.562015	1.57516	1.47633
b2609	rpsP	chr	-	2743958,	2744207,	-8.7056	-8.76667	-8.75713	-9.47605	-9.36268	-9.36433	-8.69438	-8.76777	-8.966	-8.74692	-9.40328	-8.75771	0.000611188	0.0058361	0.00850582	0.0324881	0.656364	0.645575	1.57611	1.56436
b2812	ygdL	chr	-	2943057,	2943864,	-12.3539	-12.6457	-12.3437	-13.1094	-13.1333	-13.0151	-12.3625	-12.4762	-12.155	-12.4444	-13.101	-12.3687	0.0146111	0.0406412	0.00815647	0.0315384	0.656612	0.732285	1.57638	1.66127
b1088	yceD	chr	+	1146016,	1146538,	-7.84887	-7.86654	-7.80853	-8.47869	-8.53519	-8.45438	-7.87773	-7.87644	-7.88003	-7.83886	-8.49856	-7.87761	5.4149e-05	0.00173056	0.0015024	0.0126492	0.6597	0.620952	1.57975	1.53789
b3984	rplA	chr	+	4176901,	4177606,	-7.43061	-7.399	-7.36354	-8.05114	-8.07396	-8.00879	-7.28353	-7.26514	-7.31306	-7.39293	-8.05281	-7.28123	1.85607e-05	0.00109636	1.27725e-05	0.00144278	0.659884	0.771581	1.57996	1.70714
b2234	nrdA	chr	+	2342886,	2345172,	-10.5742	-10.561	-10.4334	-11.13	-11.1436	-11.337	-10.6728	-10.6373	-10.3477	-10.5125	-11.174	-10.6078	0.00189425	0.0115875	0.0092343	0.0340257	0.661504	0.566242	1.58173	1.48066
b2608	rimM	chr	-	2743391,	2743940,	-7.74847	-7.83378	-7.7897	-8.41399	-8.45895	-8.54781	-7.72224	-7.68702	-7.94558	-7.79398	-8.45902	-7.74008	0.000361175	0.0042209	0.00525455	0.0245318	0.665046	0.718941	1.58562	1.64597
b2343	yfcZ	chr	-	2458671,	2458956,	-11.3043	-11.2261	-11.3669	-11.9249	-11.9227	-12.1832	-10.6485	-10.4987	-10.477	-11.3006	-11.9705	-10.5677	0.00600676	0.0237653	0.000393156	0.00586364	0.669937	1.40283	1.591	2.64419
b1658	purR	chr	+	1735867,	1736893,	-11.3845	-11.4051	-11.6055	-12.0452	-12.2853	-12.074	-11.3284	-11.5763	-11.307	-11.4752	-12.1523	-11.4086	0.00297889	0.0151929	0.00331388	0.0180946	0.677134	0.743715	1.59896	1.67448
b2607	trmD	chr	-	2742593,	2743361,	-7.52082	-7.5384	-7.56931	-8.20412	-8.22408	-8.26878	-7.37868	-7.36015	-7.25682	-7.54592	-8.22529	-7.35354	1.73402e-05	0.00109636	0.000252625	0.0047664	0.679379	0.871756	1.60145	1.82989
b4557	yidD	chr	+	3882838,	3883096,	-11.9213	-12.07	-11.9402	-12.8006	-12.4812	-12.8516	-12.1177	-12.2432	-11.8682	-11.9789	-12.6595	-12.1205	0.0140377	0.0396091	0.0166432	0.0487163	0.680575	0.538962	1.60278	1.45293
b0951	pqiB	chr	+	1012481,	1014122,	-12.6189	-12.6924	-12.3769	-13.2834	-13.2929	-12.9865	-12.4649	-12.5683	-12.6696	-12.5419	-13.2249	-12.53	0.0108175	0.0336993	0.0107245	0.0382312	0.682969	0.694864	1.60544	1.61873
b0023	rpsT	chr	-	20814,	21078,	-6.55648	-6.5784	-6.54908	-7.24519	-7.24643	-7.24426	-6.90198	-6.84729	-6.98191	-6.56111	-7.24556	-6.89357	0.000154335	0.00306708	0.0133317	0.0428694	0.684447	0.35199	1.60709	1.27632
b2185	rplY	chr	+	2280538,	2280823,	-9.28374	-9.18379	-9.27023	-9.89815	-9.92269	-10.0043	-9.50933	-9.52922	-9.44134	-9.24303	-9.92908	-9.50613	0.000101021	0.00272757	0.000505098	0.00681882	0.686042	0.422941	1.60886	1.34066
b4242	mgtA	chr	+	4465647,	4468344,	-10.5919	-10.6027	-10.6616	-11.288	-11.2815	-11.4205	-10.2693	-10.2464	-10.1768	-10.6228	-11.3098	-10.2472	0.000963058	0.00777396	0.000126847	0.00387997	0.687016	1.06266	1.60995	2.08878
b1866	aspS	chr	-	1946773,	1948546,	-10.6651	-10.6275	-10.6035	-11.302	-11.2663	-11.4593	-10.6098	-10.6752	-10.3895	-10.6275	-11.315	-10.5977	0.00398415	0.0185139	0.0027265	0.0168098	0.687454	0.717319	1.61044	1.64412
b1782	mipA	chr	-	1863749,	1864496,	-10.625	-10.7309	-10.6074	-11.229	-11.4812	-11.3102	-10.6425	-10.6625	-10.7545	-10.6538	-11.3516	-10.6656	0.00379365	0.0178941	0.00510447	0.0242967	0.697844	0.685994	1.62208	1.60881
b3983	rplK	chr	+	4176469,	4176898,	-8.24932	-8.30871	-8.21933	-9.00656	-8.94212	-8.95159	-8.1719	-8.18205	-7.99961	-8.25758	-8.96712	-8.14876	4.71652e-05	0.00169588	0.00227003	0.015063	0.709537	0.818358	1.63528	1.7634
b1090	plsX	chr	+	1146843,	1147914,	-9.73076	-9.93893	-9.67285	-10.4603	-10.5369	-10.4398	-9.72264	-9.8497	-9.61401	-9.77543	-10.4895	-9.74967	0.00714602	0.0262077	0.00307035	0.0172956	0.714117	0.739875	1.64048	1.67003
b0734	cydB	chr	+	772264,	773404,	-9.75221	-9.75423	-9.7083	-10.4577	-10.4681	-10.4158	-9.23948	-9.28007	-9.07097	-9.73541	-10.454	-9.2275	5.67337e-06	0.000734205	0.00158272	0.0128422	0.718623	1.22654	1.64561	2.34005
b4384	deoD	chr	+	4618905,	4619625,	-11.002	-11.1459	-11.1	-11.8684	-11.776	-11.7763	-11.3824	-11.4688	-11.477	-11.0895	-11.809	-11.4265	0.00027894	0.00370187	0.00107714	0.0101678	0.719521	0.382586	1.64664	1.30368
b3230	rpsI	chr	-	3375836,	3376229,	-8.27357	-8.27634	-8.38321	-8.99138	-9.07519	-9.05532	-8.19591	-8.13067	-8.17501	-8.31683	-9.0403	-8.16925	0.000163213	0.00306708	1.89685e-05	0.00174734	0.723476	0.871049	1.65116	1.82899
b0114	aceE	chr	+	123016,	125680,	-9.50114	-9.64687	-9.60448	-10.3545	-10.2987	-10.2839	-9.30088	-9.22436	-9.14425	-9.59137	-10.3158	-9.24943	0.000720831	0.0064067	0.000289039	0.00508578	0.724477	1.06641	1.6523	2.09422
b1089	rpmF	chr	+	1146589,	1146763,	-8.96205	-9.07926	-9.00356	-9.70153	-9.8307	-9.6874	-8.96928	-8.92129	-8.74361	-9.01836	-9.75433	-8.91689	0.000339117	0.00399291	0.00094872	0.00952905	0.735968	0.837437	1.66551	1.78687
b3181	greA	chr	-	3326260,	3326737,	-11.4263	-11.233	-11.2272	-12.2201	-11.9346	-11.8516	-11.3044	-11.2181	-11.3232	-11.2781	-12.0146	-11.2757	0.00992236	0.031841	0.0169858	0.0492067	0.736418	0.738826	1.66603	1.66882
b0781	moaA	chr	+	816266,	817256,	-12.0791	-11.7163	-12.001	-12.8139	-12.5529	-12.5929	-11.5694	-11.6583	-11.4066	-11.9141	-12.6508	-11.5748	0.00784532	0.0276188	0.000564235	0.00712574	0.736686	1.07599	1.66634	2.10816
b4375	prfC	chr	+	4607436,	4609026,	-11.2801	-11.3667	-11.2547	-12.0374	-12.0337	-12.1044	-11.1687	-11.1996	-11.0307	-11.2993	-12.0485	-11.1583	0.00012452	0.00293329	0.000805835	0.00888689	0.749195	0.890202	1.68085	1.85344
b4200	rpsF	chr	+	4423140,	4423536,	-8.84842	-8.95949	-8.94022	-9.75502	-9.57721	-9.75206	-9.08884	-9.10026	-8.98511	-8.92249	-9.6732	-9.07712	0.0010256	0.00807079	0.00172395	0.0134313	0.750702	0.596078	1.68261	1.5116
b3703	rpmH	chr	+	3882358,	3882499,	-9.47484	-9.62519	-9.55524	-10.3716	-10.2834	-10.2623	-9.47555	-9.43406	-9.5415	-9.55759	-10.3107	-9.47003	0.000238065	0.00345194	5.85821e-05	0.00277999	0.753096	0.840654	1.68541	1.79086
b4202	rpsR	chr	+	4423861,	4424089,	-10.004	-9.99198	-10.0297	-10.7265	-10.7734	-10.8776	-10.3975	-10.3516	-10.2139	-10.0099	-10.7755	-10.3528	0.00201548	0.0119103	0.00309515	0.0173107	0.765626	0.422714	1.70011	1.34045
b4409	blr	chr	+	1702574,	1702700,	-11.3589	-11.485	-11.6575	-12.4191	-12.3083	-12.0151	-11.0288	-10.9624	-11.0984	-11.5154	-12.2843	-11.0146	0.0094117	0.0305783	0.00552353	0.0251449	0.768874	1.2697	1.70394	2.41111
b3643	rph	chr	-	3813885,	3814572,	-11.6372	-11.6689	-11.4994	-12.2469	-12.4725	-12.3552	-11.5356	-11.2817	-11.1842	-11.5918	-12.364	-11.386	0.00101882	0.00805794	0.00240395	0.0154287	0.77226	0.977982	1.70794	1.96971
b3041	ribB	chr	-	3181834,	3182488,	-11.2284	-11.6184	-11.3938	-11.9763	-12.3637	-12.3014	-11.5751	-11.5215	-11.3559	-11.421	-12.1992	-11.5218	0.00839948	0.028671	0.011836	0.0402064	0.778268	0.677452	1.71507	1.59931
b0905	ycaO	chr	-	954094,	955855,	-11.9213	-12.0215	-12.0644	-12.7874	-12.8141	-12.7521	-12.1012	-12.3079	-12.1265	-12.0114	-12.7922	-12.1754	0.000807726	0.00691635	0.00770917	0.0307973	0.780764	0.616739	1.71804	1.5334
b4201	priB	chr	+	4423542,	4423857,	-9.52792	-9.75299	-9.61631	-10.3889	-10.415	-10.494	-9.85019	-9.87154	-9.91625	-9.6382	-10.4203	-9.86735	0.00191446	0.0116084	0.00036791	0.00575079	0.78211	0.55296	1.71964	1.46709
b0448	mdlA	chr	+	468094,	469867,	-12.5138	-12.1524	-12.2242	-12.8684	-13.2328	-13.0442	-12.186	-12.3212	-12.4066	-12.2671	-13.0542	-12.2642	0.00793369	0.0277473	0.00685487	0.0287794	0.787186	0.790005	1.7257	1.72908
b4599	yneM	chr	+	1620669,	1620765,	-10.7791	-10.8635	-10.8583	-11.7046	-11.6478	-11.4495	-11.0446	-10.9366	-11.155	-10.8392	-11.627	-11.0204	0.00529683	0.0217712	0.00573969	0.025681	0.787847	0.606629	1.7265	1.5227
b3806	cyaA	chr	+	3989175,	3991722,	-10.8064	-10.7982	-10.7942	-11.6559	-11.5392	-11.5929	-11.2716	-11.3079	-11.3726	-10.7987	-11.5912	-11.299	0.00161617	0.0105675	0.00361743	0.0191382	0.792427	0.292155	1.73199	1.22447
b0058	rluA	chr	-	59686,	60346,	-12.7324	-13.1722	-12.9855	-13.5244	-13.9168	-13.9585	-12.8519	-12.7907	-12.9409	-12.9749	-13.7684	-12.8424	0.0114268	0.0350869	0.0143742	0.0447516	0.793522	0.926052	1.7333	1.90007
b0814	ompX	chr	+	849672,	850188,	-8.89354	-8.84495	-8.8548	-9.59296	-9.64906	-9.80408	-8.76283	-8.7965	-8.82447	-8.86125	-9.65674	-8.78373	0.00414179	0.018965	0.00295782	0.0171554	0.795484	0.873008	1.73566	1.83148
b3066	dnaG	chr	+	3209128,	3210874,	-10.9515	-10.8932	-10.9932	-11.755	-11.7131	-11.8135	-10.9524	-10.9572	-10.9162	-10.9471	-11.7473	-10.9487	3.8213e-05	0.00161734	0.000228284	0.00465325	0.800244	0.798601	1.7414	1.73941
b3936	rpmE	chr	+	4125035,	4125248,	-10.0119	-10.209	-9.91808	-10.6892	-10.9109	-11.0151	-9.96552	-9.96237	-9.97871	-10.0379	-10.8446	-9.96633	0.00317985	0.0158725	0.010974	0.038644	0.806788	0.87831	1.74931	1.83822
b0842	cmr	chr	+	882895,	884128,	-13.2658	-13.0455	-13.3972	-13.8964	-14.2037	-14.0151	-13.2304	-13.0537	-13.044	-13.2331	-14.0485	-13.1372	0.00439086	0.0195343	0.00175433	0.0134671	0.815397	0.911326	1.75978	1.88077
b3982	nusG	chr	+	4175765,	4176311,	-10.3289	-10.3201	-10.1944	-11.1053	-11.0893	-11.0665	-10.2903	-10.2464	-10.1623	-10.2714	-11.0906	-10.2551	0.00171652	0.0107955	0.000900211	0.0093982	0.819264	0.835515	1.76451	1.78449
b0636	ybeA	chr	-	667470,	667938,	-12.8413	-12.7019	-13.2182	-13.5915	-13.8933	-13.7521	-13.0288	-12.6004	-12.4413	-12.9237	-13.7497	-12.769	0.0166227	0.044346	0.0132956	0.0428413	0.825964	0.980632	1.77272	1.97333
b1203	ychF	chr	-	1255943,	1257035,	-10.803	-11.2573	-11.1855	-11.7359	-11.9958	-12.216	-11.3824	-11.3013	-11.0045	-11.0993	-11.933	-11.292	0.0104052	0.0328944	0.0149343	0.0459471	0.833714	0.641047	1.78227	1.55946
b1967	hchA	chr	+	2033858,	2034710,	-14.2658	-14.2399	-13.8583	-14.8684	-14.8933	-15.074	-14.5524	-14.4911	-14.3395	-14.083	-14.9173	-14.4974	0.0120835	0.0362504	0.00590701	0.026131	0.834237	0.419906	1.78291	1.33784
b2277	nuoM	chr	-	2389533,	2391063,	-9.91385	-9.83051	-9.84201	-10.6204	-10.739	-10.7282	-10.217	-10.2915	-10.2443	-9.85617	-10.6926	-10.2472	0.000125498	0.00293329	0.00153288	0.0127686	0.836465	0.445467	1.78567	1.36175
b3426	glpD	chr	+	3560035,	3561541,	-8.90551	-8.97024	-9.08002	-9.83749	-9.85174	-9.80097	-8.81511	-8.8509	-8.58457	-8.99506	-9.83658	-8.79113	0.00190824	0.0116084	0.00477626	0.0230142	0.841525	1.04545	1.79194	2.06401
b2779	eno	chr	-	2904664,	2905963,	-8.77651	-8.68354	-8.69621	-9.58867	-9.55404	-9.49656	-8.79497	-8.67951	-8.889	-8.71205	-9.55513	-8.76579	3.25938e-05	0.00145834	0.00209622	0.0146674	0.843077	0.789344	1.79387	1.72829
b0661	miaB	chr	-	692753,	694178,	-11.0959	-11.159	-11.1393	-11.9541	-11.971	-12.074	-11.1261	-11.0988	-10.6904	-11.1347	-11.9841	-11.0438	0.000283017	0.00372441	0.0135864	0.0435099	0.849434	0.940318	1.80179	1.91895
b0469	apt	chr	+	490635,	491187,	-11.9138	-11.8905	-12.2425	-12.9838	-12.8251	-12.801	-11.8659	-11.9366	-11.551	-12.0259	-12.876	-11.8389	0.00706004	0.0260142	0.00429671	0.0216355	0.850179	1.03711	1.80272	2.05211
b0782	moaB	chr	+	817277,	817790,	-13.583	-13.8111	-13.8963	-14.4813	-14.76	-14.6589	-13.4026	-13.4911	-13.477	-13.7802	-14.6335	-13.4445	0.00233007	0.0131729	0.00225243	0.015063	0.85324	1.18896	1.80655	2.27989
b3231	rplM	chr	-	3376244,	3376673,	-8.19635	-8.14511	-8.25704	-9.07996	-9.03132	-9.08719	-8.32114	-8.27359	-8.42168	-8.2017	-9.05965	-8.31819	0.000139315	0.00306708	0.00117895	0.0107339	0.857941	0.741452	1.81245	1.67186
b2684	mprA	chr	+	2808791,	2809322,	-12.2376	-12.0886	-12.0483	-12.9541	-12.905	-13.1671	-12.3925	-12.2559	-12.3395	-12.1092	-12.9705	-12.3346	0.0013514	0.00944772	0.00523428	0.0245318	0.861326	0.635877	1.81671	1.55388
b1207	prs	chr	-	1260150,	1261098,	-9.64803	-9.70792	-9.64936	-10.5326	-10.6851	-10.3782	-9.54253	-9.48552	-9.58944	-9.66907	-10.5653	-9.52865	0.00793792	0.0277473	0.00413154	0.0212131	0.896262	1.03668	1.86124	2.05151
b2942	metK	chr	+	3084727,	3085882,	-11.1257	-11.0365	-10.8122	-11.7171	-11.9227	-12.059	-10.9487	-11.0874	-10.7765	-10.9649	-11.8684	-10.9691	0.00267414	0.0142779	0.00207216	0.0146506	0.903547	0.899319	1.87066	1.86518
b0903	pflB	chr	-	950494,	952777,	-8.89079	-8.87762	-8.81164	-9.82903	-9.73898	-9.69316	-8.19701	-8.12483	-8.27729	-8.85456	-9.76193	-8.18218	0.000165087	0.00306708	1.38112e-05	0.00144278	0.907378	1.57976	1.87563	2.9892
b3184	yhbE	chr	-	3329791,	3330757,	-11.6809	-11.6736	-11.9303	-12.603	-12.6577	-12.9585	-12.1177	-12.0649	-11.6491	-11.7715	-12.6904	-12.0204	0.0027558	0.0144818	0.0149049	0.045947	0.918895	0.669982	1.89067	1.59105
b3648	gmk	chr	+	3819450,	3820074,	-11.3948	-11.4809	-11.5743	-12.4499	-12.3637	-12.5297	-11.9085	-11.9676	-11.8682	-11.4938	-12.4259	-11.9232	0.000172753	0.00306708	0.00167629	0.0134313	0.932124	0.502673	1.90808	1.41684
b2298	yfcC	chr	+	2415102,	2416623,	-14.1214	-14.5141	-14.5401	-15.3209	-15.2625	-15.6589	-13.1261	-13.8282	-13.2753	-14.4115	-15.3534	-13.3638	0.0051967	0.0215863	0.00304918	0.0172542	0.941914	1.98959	1.92108	3.97124
b3871	typA	chr	+	4056429,	4058253,	-9.58598	-9.55448	-9.64128	-10.4867	-10.5807	-10.5557	-9.40261	-9.48552	-9.47696	-9.59637	-10.541	-9.44256	1.66071e-05	0.00109636	9.79789e-06	0.00144278	0.944599	1.0984	1.92465	2.14118
b0733	cydA	chr	+	770680,	772249,	-9.27178	-9.34789	-9.20996	-10.2834	-10.2091	-10.1631	-8.9721	-9.02083	-9.03402	-9.27259	-10.2265	-8.99835	6.67146e-05	0.00197123	6.63686e-05	0.00291601	0.953916	1.22816	1.93712	2.34268
b0630	lipB	chr	-	660859,	661501,	-13.9592	-14.0577	-13.9958	-14.8139	-15.0926	-15.074	-14.0929	-13.9468	-14.0984	-14.0073	-14.9814	-14.0399	0.00461079	0.0200569	0.00231523	0.015185	0.974094	0.941509	1.96441	1.92054
b0847	ybjL	chr	-	887356,	889042,	-12.5712	-12.8743	-12.6494	-13.8684	-13.5621	-13.801	-13.1094	-13.0988	-12.7545	-12.7019	-13.7129	-13.0477	0.00129774	0.00928144	0.00809158	0.0315209	1.01105	0.665158	2.01537	1.58574
b0877	ybjX	chr	-	917350,	918343,	-11.2146	-11.3667	-11.3242	-12.2113	-12.3963	-12.3735	-11.3478	-11.3826	-11.6491	-11.3094	-12.3219	-11.4011	0.000223568	0.00333435	0.00308518	0.0173107	1.0125	0.920829	2.0174	1.8932
b0337	codA	chr	+	355394,	356678,	-13.0219	-13.6005	-13.3437	-14.6146	-14.2625	-14.1354	-13.0766	-12.9062	-12.629	-13.3323	-14.3534	-12.9414	0.0105353	0.0330628	0.00169148	0.0134313	1.02106	1.41197	2.02941	2.661
b1583	ynfB	chr	+	1653831,	1654173,	-14.2284	-14.0577	-14.2922	-15.3209	-14.9895	-15.6589	-14.508	-14.1219	-13.9915	-14.1906	-15.2184	-14.278	0.0184835	0.047451	0.0119837	0.04062	1.02783	0.940388	2.03895	1.91904
b1626	ydgK	chr	+	1703273,	1703714,	-13.1044	-13.1989	-13.0698	-14.077	-14.1751	-14.2666	-12.8799	-13.01	-12.9409	-13.1224	-14.1554	-12.9341	0.000195497	0.00312395	0.00011877	0.00387486	1.03299	1.22133	2.04626	2.33162
b2780	pyrG	chr	-	2906050,	2907688,	-9.74227	-9.59272	-9.66157	-10.7809	-10.5901	-10.7763	-9.79414	-9.67951	-9.63398	-9.65737	-10.6926	-9.72819	0.000331991	0.00396868	0.000318982	0.00529905	1.03527	0.964446	2.04949	1.95131
b1593	ynfK	chr	-	1664547,	1665243,	-13.8413	-13.4809	-14.059	-14.8684	-14.7182	-14.9585	-13.0132	-13.1935	-13.4066	-13.7802	-14.8163	-13.1288	0.0140865	0.0396752	0.000686106	0.00799997	1.0361	1.68752	2.05068	3.22102
b2498	upp	chr	-	2618267,	2618894,	-10.7456	-10.6619	-10.6759	-11.794	-11.6478	-11.7886	-10.5495	-10.7274	-10.199	-10.6887	-11.7266	-10.5508	0.000259847	0.00365497	0.00984135	0.0357577	1.03793	1.17576	2.05327	2.25911
b2576	srmB	chr	+	2710917,	2712252,	-12.364	-12.2056	-12.4108	-13.4813	-13.2777	-13.411	-12.508	-12.5525	-12.8447	-12.3246	-13.3747	-12.5691	0.000249971	0.00359133	0.00716004	0.029663	1.05011	0.805643	2.07069	1.74792
b2924	mscS	chr	-	3066968,	3067829,	-11.7723	-11.4365	-11.7414	-12.7486	-12.6978	-12.5929	-11.9978	-11.9162	-11.5701	-11.6354	-12.6949	-11.8981	0.00450243	0.0197877	0.014792	0.0456888	1.05945	0.79676	2.08413	1.7372
b2507	guaA	chr	-	2628979,	2630557,	-9.59192	-9.67239	-9.56955	-10.603	-10.6405	-10.9242	-9.19811	-9.24797	-9.16226	-9.61031	-10.6771	-9.2103	0.00482779	0.0204451	0.00290621	0.0171554	1.06675	1.46676	2.09472	2.764
b1632	rsxE	chr	+	1708851,	1709547,	-13.8991	-14.3554	-14.059	-15.3989	-15.2625	-14.7521	-13.9978	-13.6498	-13.629	-14.1092	-15.1929	-13.8086	0.0161218	0.0433793	0.0070792	0.0296418	1.08372	1.38434	2.11949	2.61052
b0819	ybiS	chr	-	854046,	854967,	-11.4531	-11.5016	-11.6575	-12.5915	-12.7182	-12.5297	-11.6216	-11.7186	-11.629	-11.5479	-12.6335	-11.6566	0.00021793	0.00333435	0.000490472	0.00667895	1.0856	0.976914	2.12226	1.96825
b2264	menD	chr	-	2375610,	2377281,	-12.9902	-12.9291	-12.9156	-14.1425	-13.8933	-14.1995	-12.4438	-12.8667	-12.1265	-12.9393	-14.0371	-12.5245	0.00472405	0.0202681	0.00850191	0.0324881	1.09785	1.51258	2.14035	2.85319
b1062	pyrC	chr	-	1120783,	1121830,	-12.6069	-12.9861	-13.0376	-14.1094	-13.9406	-13.9585	-12.7322	-12.6667	-12.629	-12.8969	-14.0034	-12.6931	0.00730889	0.0264335	0.000156065	0.00407331	1.10654	1.31034	2.15329	2.48
b0841	ybjG	chr	-	882014,	882611,	-12.3948	-12.6642	-12.6413	-13.9541	-13.6187	-13.5715	-12.6098	-12.4179	-12.6696	-12.581	-13.722	-12.5466	0.00221493	0.0126591	0.0025572	0.0160183	1.14097	1.17537	2.2053	2.25851
b0522	purK	chr	-	550749,	551817,	-13.1562	-12.683	-13.1478	-14.2469	-14.1751	-13.8516	-12.771	-13.3482	-12.7545	-12.9709	-14.131	-12.9487	0.00619723	0.0241414	0.0123082	0.041177	1.16009	1.18223	2.23472	2.26928
b1131	purB	chr	-	1189838,	1191209,	-11.3793	-11.1989	-11.264	-12.3209	-12.4212	-12.7048	-11.1558	-11.3146	-11.229	-11.2695	-12.4333	-11.2214	0.00323326	0.0159725	0.00360718	0.0191382	1.16382	1.21196	2.24049	2.31652
b2476	purC	chr	-	2594926,	2595640,	-13.1562	-13.133	-13.0807	-14.3989	-14.2037	-14.2666	-13.3625	-13.1692	-13.155	-13.118	-14.2843	-13.2597	0.00076013	0.00668744	0.00031172	0.00524897	1.16632	1.02465	2.24438	2.03447
b2393	nupC	chr	+	2511063,	2512266,	-10.6527	-10.7358	-10.8259	-12.0219	-11.9286	-11.8135	-11.0485	-11.1395	-11.0307	-10.7482	-11.9383	-11.0776	0.000139296	0.00306708	0.000931501	0.00947228	1.19013	0.860707	2.28173	1.81593
b1476	fdnI	chr	+	1549361,	1550015,	-14.0543	-13.548	-13.6988	-14.7615	-14.8933	-15.337	-12.5637	-12.7542	-12.7114	-13.7253	-14.9173	-12.6506	0.00624419	0.0241442	0.00279355	0.0168907	1.192	2.26671	2.28469	4.81223
b0477	gsk	chr	+	499348,	500653,	-12.5138	-12.7604	-12.4108	-13.6862	-13.8251	-13.7048	-12.4649	-12.6004	-12.307	-12.5509	-13.7497	-12.4866	0.00298813	0.0151929	0.000908927	0.00942635	1.19881	1.26303	2.29551	2.4
b1722	ydiY	chr	-	1803348,	1804107,	-12.7723	-12.6184	-12.8677	-14.0452	-13.9406	-13.8516	-13.0929	-13.0317	-13.155	-12.7525	-13.9597	-13.0796	0.0002917	0.00380669	0.000538847	0.00698432	1.20721	0.880068	2.30891	1.84046
b0859	rumB	chr	+	897740,	898868,	-13.7064	-13.6184	-13.6332	-14.9249	-14.9895	-14.5715	-13.7975	-13.4037	-13.155	-13.6466	-14.876	-13.5411	0.00958084	0.0309992	0.00542873	0.0248578	1.22949	1.33496	2.34484	2.52269
b0961	yccF	chr	-	1023124,	1023571,	-14.1918	-14.4485	-13.9552	-15.5688	-15.4552	-15.074	-14.3429	-14.6838	-14.629	-14.1721	-15.4111	-14.4974	0.00486622	0.0205404	0.0143245	0.0446857	1.23897	0.91372	2.3603	1.8839
b2081	yegQ	chr	+	2163691,	2165053,	-12.5138	-12.8851	-12.5477	-13.8964	-13.8475	-13.9585	-12.9524	-12.4614	-12.6696	-12.6466	-13.8862	-12.718	0.00587209	0.0233987	0.0106528	0.0380875	1.23968	1.16828	2.36147	2.24744
b2313	cvpA	chr	-	2428296,	2428785,	-12.6434	-13.1075	-12.9452	-14.5688	-13.9406	-14.0151	-13.3429	-13.0317	-12.9915	-12.9121	-14.1554	-13.1711	0.0084474	0.0287579	0.0170621	0.0492067	1.24328	0.984294	2.36736	1.97834
b1281	pyrF	chr	+	1339944,	1340682,	-12.6189	-12.4809	-12.7242	-14.077	-13.739	-13.7521	-12.6335	-12.6004	-12.3726	-12.6088	-13.8559	-12.5805	0.00145098	0.00992239	0.000968739	0.00960156	1.24711	1.27541	2.37366	2.42068
b3612	gpmM	chr	+	3783282,	3784827,	-10.9669	-10.8878	-10.9552	-12.2742	-12.168	-12.1044	-11.0093	-10.9834	-11.0045	-10.9344	-12.1929	-10.9993	0.000222564	0.00333435	0.00138516	0.0121182	1.25852	1.1936	2.39251	2.28723
b0238	gpt	chr	+	255976,	256435,	-12.0625	-11.8059	-12.2062	-13.3594	-13.3083	-13.1044	-11.9524	-12.2817	-12.2753	-12.0197	-13.2843	-12.1081	0.00171566	0.0107955	0.00187119	0.0136929	1.26467	1.1762	2.40273	2.25981
b1126	potA	chr	-	1183680,	1184817,	-12.2376	-12.4727	-12.1478	-13.3594	-13.5996	-13.8516	-12.771	-12.4614	-12.551	-12.2769	-13.5501	-12.6209	0.00255305	0.0140777	0.00641719	0.0276841	1.27315	0.929122	2.41688	1.90412
b2312	purF	chr	-	2426742,	2428260,	-11.8203	-12.1524	-12.0062	-13.1938	-13.3881	-13.2327	-12.314	-12.4323	-12.1842	-12.0032	-13.2843	-12.3346	0.000897703	0.00743811	0.000588274	0.00725384	1.28111	0.949693	2.43027	1.93146
b2557	purL	chr	-	2689677,	2693565,	-10.9363	-11.0245	-10.7178	-12.0531	-12.1196	-12.4691	-11.244	-11.01	-10.88	-10.8743	-12.1554	-11.0999	0.00175219	0.0109461	0.00251217	0.0158972	1.28115	1.0555	2.43032	2.07844
b2705	srlD	chr	+	2825758,	2826538,	-10.6189	-10.8292	-10.5067	-11.8964	-11.9346	-12.1512	-11.0565	-10.9834	-10.8216	-10.641	-11.9597	-10.9936	0.000474003	0.0049457	0.000644677	0.00782608	1.31872	0.966107	2.49445	1.95356
b3162	deaD	chr	-	3303992,	3305882,	-10.6809	-10.648	-10.8328	-11.9249	-12.1333	-12.1198	-10.5107	-10.5486	-10.468	-10.727	-12.0514	-10.5177	0.000130948	0.00297195	0.000689652	0.00799997	1.32442	1.53369	2.50433	2.89525
b4469	ygiQ	chr	-	3156948,	3159168,	-12.6809	-12.7019	-12.4247	-13.9249	-13.8031	-14.2666	-12.508	-12.7723	-12.4066	-12.581	-13.9278	-12.5805	0.00209397	0.0121873	0.00155882	0.0128422	1.34672	1.3473	2.54333	2.54436
b3261	fis	chr	+	3409292,	3409589,	-11.3539	-11.4168	-11.387	-12.6862	-12.7707	-12.7521	-11.295	-11.2057	-11.5894	-11.3886	-12.7358	-11.3014	5.13277e-06	0.00073072	0.00522769	0.0245318	1.34719	1.43442	2.54416	2.70273
b1629	rsxC	chr	+	1704942,	1707165,	-11.4914	-11.7704	-11.5821	-12.7615	-13.1196	-13.1044	-11.6882	-12.0427	-11.459	-11.6197	-12.9759	-11.7658	0.00107554	0.00817744	0.00524045	0.0245318	1.35627	1.21015	2.56022	2.31362
b1676	pykF	chr	+	1753721,	1755134,	-10.3215	-10.1722	-10.3161	-11.5081	-11.6978	-11.7886	-10.4103	-10.3279	-10.5797	-10.2658	-11.6421	-10.4036	0.000457435	0.00481198	0.000407279	0.00590554	1.37625	1.23851	2.59593	2.35954
b1206	ychM	chr	-	1258346,	1260026,	-12.7456	-12.6366	-12.9552	-14.3209	-14.2929	-13.7521	-12.6216	-13.1935	-12.5894	-12.7837	-14.1803	-12.7953	0.0078049	0.0276188	0.00814212	0.0315384	1.39656	1.38504	2.63273	2.61178
b3714	yieG	chr	-	3893294,	3894632,	-11.6434	-11.6184	-11.6616	-13.2113	-13.1196	-12.8261	-11.7322	-11.7098	-11.4413	-11.6418	-13.0892	-11.6778	0.00623079	0.0241442	0.000831042	0.00903758	1.44738	1.4114	2.72712	2.65995
b2014	yeeF	chr	-	2083727,	2085086,	-10.5771	-10.5225	-10.5289	-11.9541	-12.0661	-12.074	-10.2646	-10.3826	-10.071	-10.539	-12.0258	-10.2746	9.57415e-05	0.00263037	0.000666197	0.00790352	1.48683	1.75121	2.80273	3.3664
b4006	purH	chr	-	4203965,	4205555,	-12.7193	-13.1459	-12.5705	-14.0452	-14.7182	-14.1995	-12.8799	-12.7186	-12.6696	-12.7873	-14.3393	-12.7887	0.00521241	0.0215943	0.0108747	0.0385289	1.55204	1.55063	2.93231	2.92945
b4064	yjcD	chr	+	4276501,	4277851,	-11.8484	-11.7067	-11.4705	-13.2834	-13.3083	-12.931	-11.7258	-11.8473	-11.8447	-11.6418	-13.2184	-11.7854	0.000838413	0.00709705	0.00425294	0.0215537	1.57666	1.43306	2.98279	2.70019
b3260	dusB	chr	+	3408301,	3409267,	-10.0099	-9.99929	-10.1393	-11.6263	-11.6776	-11.7641	-10.1198	-9.96759	-9.94714	-10.0558	-11.6749	-10.0379	1.21626e-05	0.0010652	3.132e-05	0.00196578	1.6191	1.63692	3.07183	3.11002
b2533	suhB	chr	+	2661463,	2662267,	-10.8555	-10.585	-10.7392	-12.379	-12.255	-12.4301	-10.6425	-10.5604	-10.2911	-10.7118	-12.3323	-10.5564	0.000169943	0.00306708	0.000666149	0.00790352	1.62046	1.77588	3.07472	3.42447
b0059	hepA	chr	-	60357,	63264,	-11.9064	-11.7604	-11.5937	-13.2834	-13.5807	-13.2666	-11.53	-11.7452	-11.5701	-11.727	-13.4037	-11.6093	0.000308697	0.00386735	0.000339246	0.0054769	1.67679	1.79449	3.19715	3.46892
b0898	ycaD	chr	+	945093,	946242,	-13.3845	-13.1722	-13.2671	-14.9249	-15.2625	-14.5715	-13.745	-13.8667	-13.477	-13.2622	-14.9814	-13.7433	0.00935461	0.0305194	0.0110517	0.038644	1.71923	1.23813	3.29261	2.35892
b2206	napA	chr	-	2298288,	2300775,	-12.7324	-12.5225	-12.7852	-14.0452	-14.6381	-14.7521	-11.8109	-11.6415	-11.459	-12.6756	-14.4111	-11.6931	0.00809437	0.0279202	0.00175189	0.0134671	1.73551	2.718	3.32997	6.57958
b2508	guaB	chr	-	2630625,	2632092,	-9.71124	-9.80079	-9.82246	-11.5801	-11.4381	-11.6255	-9.79581	-9.89124	-9.85052	-9.7855	-11.524	-9.83723	5.79508e-05	0.00177943	0.000138035	0.00393024	1.73846	1.68672	3.33678	3.21924
b1109	ndh	chr	+	1165307,	1166612,	-11.8064	-12.233	-12.2859	-13.9249	-14.2037	-13.7521	-12.1773	-11.7815	-12.044	-12.1291	-14.0034	-12.005	0.000844717	0.00711197	0.00039795	0.00587915	1.87431	1.99839	3.66626	3.99555
b0945	pyrD	chr	+	1003990,	1005001,	-13.4263	-13.6184	-13.4527	-15.5688	-15.2625	-15.337	-13.8519	-13.6498	-13.629	-13.5009	-15.3819	-13.7433	0.000186375	0.00308155	0.000199266	0.00445786	1.88098	1.63866	3.68326	3.11377
b3364	tsgA	chr	+	3490589,	3491771,	-14.1918	-14.0335	-14.2922	-16.1094	-16.1471	-16.337	-14.0929	-14.1692	-14.7989	-14.1721	-16.1678	-14.2059	4.10114e-05	0.0016901	0.00918897	0.0339406	1.9957	1.96191	3.98809	3.89578
b3654	yicE	chr	+	3826967,	3828359,	-12.2376	-12.5653	-12.6494	-14.3989	-14.5621	-14.6589	-13.267	-13.01	-12.551	-12.5038	-14.518	-13.0477	0.000480042	0.0049457	0.00977951	0.0356986	2.01416	1.47025	4.03945	2.77069
b0904	focA	chr	-	952831,	953689,	-10.9981	-10.8743	-10.7264	-12.7874	-12.9406	-12.8516	-10.5808	-10.5565	-10.7989	-10.8438	-12.8659	-10.602	0.000143154	0.00306708	9.0633e-05	0.00320797	2.02215	2.26392	4.06189	4.80294
b0336	codB	chr	+	354145,	355405,	-13.247	-13.133	-13.0917	-14.7108	-15.4552	-15.6589	-13.267	-13.9062	-13.155	-13.1448	-15.1678	-13.4445	0.0160654	0.0433793	0.00871159	0.0329525	2.023	1.7233	4.06429	3.30191
b0699	ybfA	chr	+	728356,	728563,	-9.82027	-9.69717	-9.59079	-11.6801	-11.7286	-11.8645	-9.98061	-10.0399	-9.99799	-9.68414	-11.7358	-10.0041	2.40704e-05	0.00117795	0.000368889	0.00575079	2.05163	1.7317	4.14573	3.32119
b2579	yfiD	chr	-	2714087,	2714471,	-11.8133	-11.7407	-12.0376	-14.1425	-14.1471	-13.489	-10.9787	-10.7363	-10.8682	-11.8705	-13.9924	-10.8717	0.00502611	0.0211016	0.00258108	0.0161035	2.12182	3.12066	4.35244	8.69787
b1227	narI	chr	+	1285071,	1285749,	-13.8699	-14.2124	-14.059	-15.9838	-16.5256	-16.6589	-12.9524	-13.0317	-12.7545	-14.0573	-16.3254	-12.9487	0.00238875	0.0134078	0.00116084	0.0106308	2.26801	3.37661	4.81658	10.3863
b1224	narG	chr	+	1279086,	1282830,	-11.5712	-11.5099	-11.4994	-14.7108	-14.0661	-14.9585	-10.2147	-10.3931	-10.2597	-11.5213	-14.4259	-10.2827	0.00718809	0.0262242	0.0028356	0.0170136	2.90459	4.1432	7.48804	17.6696
b1474	fdnG	chr	+	1545424,	1548472,	-11.5422	-11.8214	-11.8032	-14.8684	-14.6381	-14.6589	-10.8906	-10.8715	-10.5415	-11.7371	-14.722	-10.827	1.88949e-05	0.00109636	3.07705e-05	0.00196578	2.9849	3.89496	7.91669	14.8765
b3365	nirB	chr	+	3492032,	3494576,	-12.1828	-12.7212	-12.7157	-15.9838	-15.76	-15.1995	-11.8244	-11.6667	-11.5894	-12.5598	-15.7039	-11.7306	0.000633535	0.00590546	0.00181669	0.0136226	3.14402	3.9733	8.83983	15.7066
b1475	fdnH	chr	+	1548484,	1549369,	-13.9288	-13.9403	-14.3177	-17.2469	-17.0402	-18.6589	-12.923	-13.2688	-12.7989	-14.0744	-17.3254	-13.0166	0.0150725	0.0413572	0.00800863	0.0312756	3.25093	4.3088	9.51982	19.8188
b3476	nikA	chr	+	3611689,	3613264,	-14.4694	-14.2124	-14.0807	-18.5688	-17.5256	-18.6589	-13.4231	-13.5843	-13.3395	-14.2188	-18.0258	-13.4654	0.00470693	0.0202501	0.00439762	0.0216562	3.80698	4.56037	13.9964	23.5944
b1223	narK	chr	+	1277179,	1278571,	-10.9902	-11.0486	-10.9254	-15.6619	-15.0402	-14.489	-10.095	-10.0677	-9.98511	-10.9839	-15.0951	-10.0686	0.00637717	0.0243876	0.00423535	0.0215537	4.11113	5.02646	17.2812	32.5923
b2569	lepA	chr	-	2703346,	2705146,	-10.3289	-10.3183	-10.2625	-15.0452	-14.7182	-14.7521	-7.77346	-7.79766	-7.68645	-10.2987	-14.836	-7.76883	0.000335284	0.00397769	5.58647e-05	0.00273955	4.53728	7.06714	23.2197	134.097
Below are Significant in WT/M, but not C/M
b0314	betT	chr	+	328686,	330720,	-13.7064	-13.9631	-14.1944	-11.8409	-11.6429	-11.7763	-13.6216	-14.6167	-13.4066	-13.9749	-11.7381	-13.863	0.00132152	0.00932209	0.0269251	0.0665687	-2.2368	-2.12493	0.212156	0.229262
b0791	ybhQ	chr	+	823852,	824263,	-13.4477	-13.4168	-13.5705	-11.5299	-11.3718	-11.5715	-12.0766	-11.9162	-12.629	-13.4837	-11.4655	-12.0837	2.25529e-05	0.00113928	0.0706013	0.125924	-2.01828	-0.618212	0.246852	0.651478
b3020	ygiS	chr	-	3164132,	3165740,	-14.7589	-14.9861	-14.9958	-12.7615	-13.3557	-13.6589	-14.267	-14.3757	-14.3395	-14.9276	-13.1554	-14.3155	0.0179255	0.0461699	0.0538694	0.104147	-1.77215	-1.1601	0.292772	0.447483
b1621	malX	chr	+	1697378,	1698971,	-15.6069	-15.133	-14.8772	-13.3594	-13.6187	-13.0151	-14.1948	-14.1219	-13.551	-15.1269	-13.3892	-14.0557	0.00282398	0.0146436	0.0818598	0.13816	-1.73772	-0.666489	0.299844	0.630038
b4321	gntP	chr	-	4547975,	4549319,	-14.6069	-15.548	-14.4812	-13.4191	-12.9527	-12.9041	-14.0288	-14.0761	-13.7989	-14.8085	-13.0951	-14.0089	0.0188813	0.0481566	0.0177209	0.0507329	-1.71347	-0.913808	0.304926	0.530782
b3092	uxaC	chr	-	3241350,	3242763,	-15.4263	-15.8529	-15.7328	-14.3989	-13.6776	-14.074	-15.3824	-14.8282	-13.7989	-15.6854	-13.9814	-14.8355	0.00512458	0.0214002	0.31644	0.392666	-1.70398	-0.854133	0.306939	0.553198
b0828	iaaA	chr	+	865790,	866756,	-14.3845	-15.3554	-14.8397	-13.3594	-13.2476	-12.8776	-14.5982	-15.4911	-14.3395	-14.852	-13.2056	-14.8086	0.0125596	0.0369707	0.0281055	0.0680266	-1.64641	-1.60295	0.319434	0.329203
b1930	yedF	chr	+	2007502,	2007736,	-15.8133	-15.133	-14.9958	-13.379	-13.8702	-13.3735	-14.4649	-14.4911	-15.7989	-15.2188	-13.5746	-14.6093	0.00663523	0.0250985	0.0744521	0.12998	-1.64423	-1.03467	0.319918	0.488126
b1376	uspF	chr	-	1433208,	1433643,	-14.1918	-13.6005	-14.2182	-12.3594	-12.3477	-12.3552	-13.1773	-13.0761	-13.629	-13.9669	-12.3534	-13.1971	0.0145985	0.0406412	0.031118	0.0731694	-1.61352	-0.843762	0.326799	0.557189
b1594	dgsA	chr	-	1665367,	1666588,	-14.1214	-14.5828	-14.059	-12.5688	-12.7922	-12.411	-13.4649	-13.8667	-13.2139	-14.2379	-12.6292	-13.5522	0.00197273	0.011796	0.0214178	0.0570414	-1.60873	-0.923037	0.327887	0.527398
b2426	ucpA	chr	-	2541853,	2542645,	-12.2946	-12.1202	-12.2985	-10.6589	-10.6308	-10.7401	-11.6636	-11.5447	-11.229	-12.2331	-10.6617	-11.5494	0.000130735	0.00297195	0.0199238	0.0549309	-1.57146	-0.887773	0.336468	0.540448
b1611	fumC	chr	-	1683208,	1684612,	-14.6558	-15.2965	-14.8397	-13.4395	-13.161	-13.7521	-15.0929	-14.9886	-16.7989	-14.9276	-13.3605	-15.2059	0.00459896	0.0200569	0.0559781	0.107035	-1.56712	-1.84544	0.337481	0.27827
b0162	cdaR	chr	+	182462,	183620,	-14.1918	-14.548	-14.2922	-12.6984	-12.9895	-12.7521	-13.9978	-13.8282	-14.7989	-14.3478	-12.831	-14.0243	0.000445439	0.00474528	0.0342592	0.0782118	-1.51676	-1.19326	0.34947	0.437314
b3107	yhaL	chr	+	3253064,	3253229,	-15.3438	-14.9861	-15.3702	-13.6862	-13.6577	-13.8516	-14.3429	-15.7542	-13.551	-15.2188	-13.7039	-14.5191	0.0019199	0.0116084	0.331942	0.405477	-1.51494	-0.815193	0.34991	0.568332
b2421	cysM	chr	-	2536693,	2537605,	-15.4263	-15.0335	-15.6015	-13.5688	-14.4212	-13.5715	-15.3824	-14.9886	-14.2139	-15.3375	-13.8862	-15.0089	0.0167218	0.0443837	0.0887407	0.146745	-1.45121	-1.12262	0.365714	0.459259
b4151	frdD	chr	-	4377029,	4377389,	-13.5365	-13.7906	-13.6988	-12.229	-12.3557	-12.1671	-13.2486	-13.7907	-13.0984	-13.6854	-12.2709	-13.3935	0.000173048	0.00306708	0.0265586	0.0661059	-1.41447	-1.12262	0.375147	0.459259
b0287	yagU	chr	+	302214,	302829,	-15.8133	-15.6924	-15.1251	-14.4395	-13.9406	-14.074	-15.16	-14.4911	-15.7989	-15.4667	-14.131	-14.9487	0.0078659	0.0276188	0.103592	0.164528	-1.33576	-0.817767	0.396183	0.567319
b0312	betB	chr	-	326484,	327957,	-14.5138	-14.2399	-14.5104	-12.999	-13.2037	-13.1044	-14.6944	-14.9886	-13.629	-14.4115	-13.1069	-14.5634	0.000599361	0.00579383	0.0809942	0.137269	-1.30452	-1.45652	0.404855	0.36437
b0652	gltL	chr	-	683752,	684478,	-14.8699	-15.3554	-15.6015	-14.2469	-13.9168	-13.9041	-15.0929	-14.9062	-inf	-15.2968	-14.0258	-15.2415	0.0138859	0.0396091	0	0	-1.27102	-1.21573	0.414367	0.430555
b3172	argG	chr	+	3316658,	3318002,	-15.0543	-15.0335	-15.1709	-13.6381	-13.9406	-14.0151	-14.745	-14.4323	-15.7989	-15.0917	-13.836	-14.7306	0.00424629	0.0192187	0.103068	0.163862	-1.25573	-0.894594	0.418782	0.537899
b4342	yjiT	chr	+	4570436,	4571939,	-14.3845	-13.918	-14.1944	-13.061	-12.8363	-12.6817	-14.508	-13.9062	-15.477	-14.1358	-12.8811	-14.354	0.0020024	0.0118779	0.0538051	0.104147	-1.25468	-1.47286	0.419085	0.360266
b1256	ompW	chr	+	1312043,	1312682,	-13.5365	-13.5141	-13.0483	-12.1012	-12.0146	-12.1198	-13.0929	-12.7011	-13.551	-13.317	-12.0658	-12.9936	0.0122836	0.0365676	0.0496117	0.0983441	-1.2512	-0.927805	0.420099	0.525657
b3284	smg	chr	-	3430012,	3430486,	-14.6558	-14.3858	-13.9156	-13.229	-12.9286	-13.0442	-13.9674	-13.6498	-14.7989	-14.2379	-13.0542	-13.9341	0.017482	0.0456281	0.0807089	0.137231	-1.18367	-0.879846	0.440231	0.543425
b1902	ftnB	chr	+	1984948,	1985452,	-15.3438	-15.133	-15.6015	-13.8409	-14.3881	-14.489	-15.16	-14.3757	-15.2139	-15.3582	-14.1803	-14.8355	0.013514	0.039046	0.121098	0.184599	-1.17791	-0.655229	0.441992	0.634975
b1770	ydjF	chr	-	1852119,	1852878,	-14.4694	-13.9403	-14.4247	-13.0142	-13.1751	-13.074	-13.4863	-13.5525	-14.2139	-14.2476	-13.0951	-13.5977	0.0144129	0.0403766	0.0985277	0.158576	-1.15251	-0.502612	0.449841	0.705828
b4015	aceA	chr	+	4215131,	4216436,	-11.6434	-11.992	-11.7588	-10.5773	-10.7627	-10.62	-12.3824	-12.1103	-11.551	-11.8032	-10.6649	-12.133	0.00197353	0.011796	0.0259382	0.0653042	-1.13823	-1.46805	0.454316	0.36147
b3750	rbsC	chr	+	3933310,	3934276,	-12.9902	-13.4168	-12.9652	-11.6984	-12.2255	-12.0296	-12.6697	-12.8473	-12.3395	-13.1136	-11.9759	-12.6747	0.00586746	0.0233987	0.041436	0.087818	-1.13764	-0.698764	0.454501	0.6161
b3103	yhaH	chr	+	3250325,	3250691,	-15.1918	-15.2399	-15.3177	-13.9838	-14.4212	-13.9585	-14.508	-14.1692	-14.3395	-15.2573	-14.1554	-14.354	0.0133083	0.0386657	0.301326	0.376888	-1.10185	-0.19857	0.465917	0.871414
b1439	ydcR	chr	+	1508026,	1509433,	-14.8133	-14.6184	-14.9552	-13.7615	-13.739	-13.489	-14.3044	-15.3757	-15.2139	-14.7943	-13.6949	-14.7306	0.00103907	0.0081187	0.051824	0.101573	-1.09943	-1.03569	0.466699	0.487784
b3885	yihX	chr	+	4073575,	4074175,	-13.8413	-14.0577	-14.2671	-12.8409	-13.161	-13.0151	-13.6455	-14.0761	-14.629	-14.0744	-13.009	-13.9052	0.00314092	0.0158157	0.0485823	0.0966707	-1.06543	-0.896256	0.477829	0.537279
b3432	glgB	chr	-	3569338,	3571525,	-13.5138	-13.5653	-13.6173	-12.6619	-12.6381	-12.3191	-13.4231	-13.7907	-14.477	-13.5719	-12.5787	-13.6686	0.00786477	0.0276188	0.0360553	0.080661	-0.993209	-1.08992	0.502359	0.469786
b1853	yebK	chr	+	1934675,	1935545,	-13.1739	-13.1989	-13.5859	-12.3691	-12.3239	-12.3191	-12.7195	-13.4037	-13.044	-13.3323	-12.3393	-12.9785	0.0168387	0.044543	0.0671288	0.12153	-0.993017	-0.639197	0.502426	0.64207
b3546	eptB	chr	-	3706806,	3708498,	-13.2658	-13.4012	-13.3307	-12.2742	-12.3637	-12.4691	-13.0446	-13.2181	-14.0984	-13.3375	-12.3498	-13.2236	0.000300638	0.0038267	0.0757427	0.131271	-0.987617	-0.873766	0.50431	0.54572
b2573	rpoE	chr	-	2707458,	2708034,	-11.6872	-12.0577	-11.9011	-10.8753	-10.9497	-10.9516	-11.2856	-11.4688	-11.6091	-11.8931	-10.9225	-11.3935	0.00940567	0.0305783	0.0236608	0.0615496	-0.970584	-0.471022	0.5103	0.721453
b0269	yagF	chr	+	282424,	284392,	-12.9592	-12.6275	-12.7675	-11.8073	-11.7868	-11.8135	-12.5982	-13.0317	-11.8682	-12.7628	-11.7994	-12.5919	0.00907351	0.0300098	0.176475	0.247412	-0.963452	-0.792528	0.512828	0.577332
b2259	pmrD	chr	-	2371293,	2371560,	-12.4803	-12.6366	-12.8305	-11.6088	-11.7338	-11.9041	-11.8799	-12.4179	-12.551	-12.6658	-11.7175	-12.1414	0.00271165	0.0143947	0.106063	0.167435	-0.948382	-0.423933	0.518213	0.74539
b0651	rihA	chr	-	682699,	683635,	-13.4914	-13.6549	-13.4957	-12.6984	-12.6187	-12.411	-13.3235	-13.2432	-14.2139	-13.5479	-12.6037	-13.3935	0.00146589	0.00993762	0.0729501	0.128215	-0.944145	-0.789799	0.519738	0.578425
b3685	yidE	chr	-	3862634,	3864296,	-13.0543	-13.07	-13.1027	-12.379	-12.0273	-12.0151	-12.5982	-12.4468	-12.3395	-13.0787	-12.1431	-12.5028	0.0148582	0.0411823	0.0975129	0.157266	-0.935569	-0.359606	0.522836	0.779377
b3963	fabR	chr	+	4159146,	4159794,	-10.9439	-10.8743	-10.8748	-9.94127	-9.95421	-10.059	-10.4412	-10.3966	-10.1054	-10.8921	-9.96915	-10.3712	0.000118859	0.00293329	0.0753428	0.131096	-0.922987	-0.402004	0.527416	0.756806
b0391	yaiE	chr	+	407400,	407685,	-14.1562	-14.0577	-14.1944	-13.265	-13.2476	-13.1354	-14.0605	-14.4911	-13.892	-14.1358	-13.2314	-14.1711	8.92558e-05	0.00249598	0.029608	0.0709112	-0.904442	-0.939758	0.534239	0.52132
b4350	hsdR	chr	-	4581271,	4584838,	-12.7858	-12.8111	-12.9254	-12.1176	-11.8086	-12.0007	-12.6216	-12.6332	-12.2753	-12.8483	-11.9516	-12.5691	0.00385006	0.0180515	0.0251547	0.0641923	-0.896699	-0.617447	0.537114	0.651823
b3222	nanK	chr	-	3367496,	3368372,	-12.247	-12.4646	-12.3049	-11.3642	-11.5077	-11.489	-13.0288	-12.9676	-12.155	-12.3426	-11.4503	-12.8424	0.000672798	0.00612559	0.0432013	0.0897257	-0.892361	-1.3921	0.538732	0.38101
b1329	mppA	chr	+	1391250,	1392864,	-12.6069	-12.8318	-12.9353	-12.1342	-11.9649	-11.5821	-12.7069	-12.2306	-12.7545	-12.8085	-11.9383	-12.5245	0.0149072	0.0412449	0.0456111	0.0927623	-0.870195	-0.586203	0.547073	0.666094
b3964	yijD	chr	+	4159793,	4160153,	-12.6189	-12.5057	-12.7414	-11.8546	-11.6726	-11.8908	-12.7975	-13.2432	-12.3726	-12.6244	-11.7779	-12.863	0.00104459	0.0081187	0.0496759	0.0983469	-0.84652	-1.08515	0.556124	0.471344
b0003	thrB	chr	+	2800,	3733,	-13.9902	-13.918	-13.9353	-13.0296	-13.161	-13.1354	-14.3044	-14.0761	-13.629	-13.9432	-13.1069	-14.104	0.000300567	0.0038267	0.0411288	0.0875104	-0.836245	-0.997091	0.5601	0.501009
b2288	nuoA	chr	-	2402650,	2403094,	-11.8555	-11.7855	-11.9907	-11.1176	-11.0273	-10.9724	-11.5524	-12.0874	-11.7765	-11.8818	-11.0485	-11.7561	0.000604837	0.00581089	0.0313274	0.0734412	-0.833261	-0.707584	0.561259	0.612345
b4020	yjbB	chr	+	4225753,	4227385,	-14.6069	-14.4809	-14.1251	-13.6619	-13.4046	-13.7048	-14.0929	-14.3757	-13.629	-14.3582	-13.5501	-14.104	0.013124	0.0383435	0.168451	0.23802	-0.808152	-0.553961	0.571113	0.681147
b0484	copA	chr	-	508098,	510603,	-13.8413	-13.6005	-13.8213	-12.8684	-12.9895	-12.9865	-12.923	-12.9468	-13.2139	-13.7456	-12.9436	-12.971	0.00265406	0.0142779	0.494545	0.563652	-0.801993	-0.0273511	0.573556	0.98122
b0674	asnB	chr	-	696735,	698400,	-14.0219	-13.6184	-13.8772	-12.8409	-13.0793	-13.2327	-14.3429	-13.3757	-13.9915	-13.8157	-13.0146	-13.8769	0.00865004	0.0291311	0.0789603	0.135139	-0.801119	-0.862386	0.573904	0.550042
b3526	kdgK	chr	+	3677441,	3678371,	-13.7064	-13.6184	-13.4108	-12.7359	-12.8933	-12.5092	-13.4026	-12.9886	-12.477	-13.5538	-12.7543	-13.0796	0.00433904	0.0194697	0.469897	0.538696	-0.799517	-0.325306	0.574542	0.798129
b3131	agaR	chr	-	3275877,	3276687,	-10.8343	-10.7091	-10.9932	-10.0374	-10.0826	-10.1512	-10.1882	-10.3079	-10.1768	-10.8483	-10.0789	-10.2281	0.00549899	0.0224256	0.0695562	0.124765	-0.769464	-0.149175	0.586635	0.901766
b4354	yjiY	chr	-	4587151,	4589302,	-10.3019	-10.4345	-10.2197	-9.55479	-9.54487	-9.60366	-10.682	-10.629	-10.1124	-10.3125	-9.55971	-10.5649	0.00413984	0.018965	0.0367345	0.0814819	-0.752834	-1.00515	0.593436	0.49822
b3283	yrdD	chr	-	3429441,	3429984,	-13.3043	-13.2261	-13.4386	-12.6146	-12.5807	-12.5297	-13.0929	-13.3212	-13.7114	-13.3272	-12.5828	-13.2506	0.00277681	0.01453	0.0450435	0.0922066	-0.744335	-0.66772	0.596943	0.629501
b1498	ydeN	chr	-	1578865,	1580548,	-13.583	-13.6736	-13.7675	-13.0452	-12.8475	-12.9865	-13.8244	-13.5215	-14.477	-13.6854	-12.9436	-13.7821	0.00087059	0.00725183	0.06795	0.122477	-0.741733	-0.838448	0.598021	0.559245
b2126	yehU	chr	-	2210980,	2212666,	-12.6189	-12.9746	-12.7942	-12.2927	-12.0273	-11.801	-12.4543	-12.4762	-12.5894	-12.805	-12.0687	-12.4813	0.0153642	0.041917	0.0714546	0.126868	-0.736267	-0.412612	0.600291	0.751262
b0801	ybiC	chr	+	835573,	836659,	-14.8699	-14.8959	-15.1251	-14.2113	-14.3881	-14.0151	-15.745	-15.6167	-14.477	-14.9749	-14.2444	-15.4342	0.00609417	0.0239786	0.108014	0.169616	-0.73045	-1.18974	0.602716	0.438383
b3486	rbbA	chr	-	3624825,	3627561,	-12.6809	-12.8743	-12.6905	-11.8964	-12.1822	-11.931	-13.16	-12.8093	-12.3395	-12.7491	-12.023	-12.884	0.00365501	0.0173974	0.0696325	0.124765	-0.726082	-0.860994	0.604544	0.550573
b0553	nmpC	chr	-	573751,	576048,	-9.74558	-9.79314	-9.84201	-9.06498	-9.07437	-9.14522	-9.8764	-9.96759	-10.5605	-9.79962	-9.08438	-9.99265	5.28773e-05	0.00172512	0.0383648	0.0841447	-0.715246	-0.908269	0.609101	0.532824
b2218	rcsC	chr	-	2315048,	2317898,	-12.5365	-12.8635	-12.8213	-12.2025	-11.9895	-11.9041	-12.5411	-12.5683	-12.4413	-12.7559	-12.0457	-12.5355	0.00680827	0.0255677	0.0190828	0.053459	-0.710276	-0.489893	0.611203	0.712078
b4216	ytfJ	chr	-	4436730,	4437285,	-14.5596	-14.6924	-14.3177	-13.9541	-13.739	-13.7048	-14.745	-14.6838	-14.2139	-14.5009	-13.8066	-14.6327	0.00768197	0.0274031	0.0304105	0.0720033	-0.694327	-0.82609	0.617997	0.564056
b3099	yqjE	chr	+	3247704,	3248109,	-13.364	-13.3705	-13.4247	-12.5688	-12.8817	-12.6146	-13.2125	-13.3212	-12.892	-13.3899	-12.7084	-13.1971	0.0160952	0.0433793	0.0525939	0.102696	-0.68154	-0.488749	0.623499	0.712643
b3942	katG	chr	+	4131857,	4134038,	-12.1562	-11.946	-12.2003	-11.4655	-11.4638	-11.479	-11.9901	-11.8377	-11.4951	-12.096	-11.4674	-11.8526	0.0148203	0.04115	0.172555	0.243005	-0.628677	-0.385273	0.646769	0.765634
b3429	glgA	chr	-	3564622,	3566056,	-13.3845	-13.5828	-13.3972	-12.9106	-12.8475	-12.7048	-13.3235	-13.1692	-13.044	-13.4555	-12.8409	-13.2236	0.00202335	0.0119119	0.0271749	0.0665975	-0.614591	-0.382684	0.653115	0.767009
b3177	folP	chr	-	3322084,	3322933,	-13.5365	-13.3858	-13.3702	-12.7359	-12.8251	-12.9041	-13.4231	-13.2688	-12.892	-13.4169	-12.8066	-13.278	0.00110076	0.0083275	0.132025	0.197446	-0.610263	-0.471425	0.655077	0.721252
b2700	ygaD	chr	-	2821870,	2822368,	-14.0875	-14.3858	-14.2922	-13.7615	-13.6381	-13.5297	-14.1261	-14.1219	-14.629	-14.2671	-13.6595	-14.1884	0.00637236	0.0243876	0.0462525	0.0935807	-0.607593	-0.528942	0.656291	0.693063
b3114	tdcE	chr	-	3258145,	3260440,	-13.583	-13.6924	-13.9353	-13.0452	-13.2777	-13.1671	-14.0929	-14.1692	-15.2139	-13.7525	-13.1678	-14.2415	0.0141511	0.0397858	0.0622637	0.116092	-0.584679	-1.07371	0.666798	0.475095
b3433	asd	chr	-	3571797,	3572901,	-12.2849	-12.1855	-12.3049	-11.7108	-11.7442	-11.6589	-12.16	-11.9366	-12.0984	-12.2573	-11.7152	-12.0676	0.000507968	0.00506674	0.0218546	0.0580073	-0.542103	-0.352417	0.686769	0.783271
b0929	ompF	chr	-	985116,	986205,	-8.87623	-8.69776	-8.79923	-8.2863	-8.2282	-8.216	-9.16434	-9.02219	-9.5321	-8.7822	-8.24669	-9.15884	0.00358327	0.0172658	0.02072	0.0561375	-0.535517	-0.912153	0.689911	0.531391
b3428	glgP	chr	-	3562156,	3564604,	-12.364	-12.5566	-12.3307	-11.8614	-11.8875	-11.931	-12.5637	-12.8473	-13.2139	-12.4142	-11.8862	-12.7433	0.0124003	0.0367779	0.0335692	0.0771944	-0.527927	-0.857031	0.693551	0.552087
b4260	pepA	chr	-	4482462,	4483974,	-11.5422	-11.3973	-11.7285	-10.9541	-11.0826	-11.074	-11.4026	-11.8569	-11.3559	-11.5583	-11.0329	-11.5411	0.0195999	0.0494259	0.0799125	0.136226	-0.525489	-0.50823	0.694724	0.703085
b1824	yobF	chr	-	1905471,	1905615,	-9.49556	-9.44249	-9.33801	-8.91596	-8.84751	-8.96546	-9.83468	-9.87154	-10.459	-9.41349	-8.89458	-9.92501	0.00124574	0.0090544	0.0269906	0.0665687	-0.51891	-1.03044	0.697899	0.489562
b0383	phoA	chr	+	400970,	402386,	-14.6069	-14.7309	-14.7675	-14.077	-14.3239	-14.2666	-14.3824	-14.4323	-14.0984	-14.7118	-14.2184	-14.354	0.00877625	0.0294296	0.560493	0.622064	-0.493411	-0.135561	0.710344	0.910316
b3536	bcsE	chr	+	3694480,	3696052,	-12.8844	-13.0949	-13.1027	-12.6619	-12.5077	-12.489	-13.3044	-12.9062	-13.4066	-13.0405	-12.5582	-13.1626	0.00745051	0.0268209	0.0382729	0.0840609	-0.482284	-0.604385	0.715843	0.657752
b3404	envZ	chr	-	3532537,	3533890,	-12.0708	-12.2056	-11.9602	-11.6381	-11.5437	-11.6589	-11.9674	-11.9886	-11.6696	-12.0701	-11.5995	-11.9268	0.0104607	0.0328944	0.11424	0.176802	-0.470603	-0.327299	0.721663	0.797027
b2836	aas	chr	-	2971876,	2974036,	-12.6311	-12.5828	-12.8032	-12.2742	-12.1471	-12.3735	-13.0288	-12.9886	-12.5894	-12.6788	-12.2346	-12.9414	0.0121577	0.036334	0.0330962	0.076395	-0.444204	-0.70677	0.73499	0.61269
b3617	kbl	chr	-	3789377,	3790574,	-11.5365	-11.4129	-11.4705	-11.0028	-11.0563	-11.0891	-11.4077	-11.4614	-11.071	-11.4667	-11.0428	-11.3712	0.00105242	0.0081187	0.158563	0.227808	-0.423937	-0.32836	0.745388	0.796441
b0767	pgl	chr	+	797808,	798804,	-13.4263	-13.548	-13.5401	-12.999	-13.2037	-13.0151	-13.771	-13.9468	-12.9409	-13.5125	-13.0892	-13.6686	0.00869112	0.0292066	0.259053	0.335548	-0.423385	-0.579479	0.745673	0.669205
b1608	rstA	chr	+	1680182,	1680902,	-12.2284	-12.2609	-12.3836	-11.8893	-11.9227	-11.8908	-12.1345	-12.0988	-11.966	-12.2993	-11.9043	-12.0958	0.0111885	0.034627	0.0781237	0.134147	-0.395059	-0.191587	0.760458	0.875642
b2598	pheL	chr	+	2735620,	2735668,	-11.0462	-11.1427	-11.1055	-10.7647	-10.7442	-10.6874	-11.1303	-11.1752	-11.7114	-11.1026	-10.7404	-11.2192	0.000659782	0.00604221	0.0808359	0.137269	-0.362211	-0.478765	0.777971	0.717591
b1816	yoaE	chr	-	1898052,	1899609,	-13.3438	-13.2821	-13.2182	-12.999	-12.8702	-12.8776	-13.6216	-13.4614	-13.2753	-13.272	-12.9173	-13.5082	0.00289619	0.0148217	0.0205721	0.0559304	-0.354711	-0.590901	0.782026	0.663928
b0242	proB	chr	+	259611,	260715,	-12.7858	-12.8959	-12.6822	-12.5027	-12.4466	-12.3735	-12.745	-12.6004	-12.2753	-12.7802	-12.4521	-12.6151	0.0137823	0.0395979	0.553404	0.616819	-0.32809	-0.162939	0.79659	0.893204
b3311	rpsQ	chr	-	3446335,	3446590,	-7.67929	-7.64028	-7.624	-7.24801	-7.39449	-7.38515	-7.3815	-7.45314	-7.53915	-7.64376	-7.33765	-7.42918	0.0151625	0.0415112	0.154095	0.223025	-0.306115	-0.0915342	0.808817	0.938524
b1101	ptsG	chr	+	1157091,	1158525,	-10.4157	-10.5267	-10.4939	-10.2582	-10.1384	-10.1631	-10.3975	-10.6838	-10.5321	-10.4845	-10.1858	-10.5136	0.00415533	0.0189716	0.0352211	0.0793614	-0.298654	-0.327802	0.813011	0.79675
b3739	atpI	chr	-	3920082,	3920463,	-10.0646	-10.0949	-10.0563	-9.72332	-9.79358	-9.86778	-10.0426	-10.0621	-9.90407	-10.0717	-9.78143	-10.0282	0.0162184	0.0434897	0.034181	0.0782118	-0.290309	-0.246748	0.817727	0.842794
b3299	rpmJ	chr	-	3440639,	3440756,	-9.14525	-9.19047	-9.17163	-8.85284	-8.89841	-8.8974	-9.01126	-8.90744	-9.06757	-9.17125	-8.88145	-8.98131	0.000153538	0.00306708	0.128015	0.192762	-0.289801	-0.0998567	0.818015	0.933126
b2286	nuoC	chr	-	2400076,	2401867,	-10.3363	-10.322	-10.3652	-10.1197	-10.0482	-10.0702	-10.5217	-10.537	-10.3151	-10.3426	-10.0782	-10.4947	0.00118664	0.0087243	0.0261261	0.0654616	-0.264459	-0.416518	0.832511	0.749231
b3461	rpoH	chr	-	3597951,	3598806,	-9.94011	-10.0964	-10.0469	-9.75182	-9.86167	-9.71058	-10.0585	-10.2369	-9.86225	-10.0352	-9.79097	-10.0877	0.0171985	0.0450382	0.108997	0.170689	-0.244263	-0.296743	0.844247	0.814088
b1819	manZ	chr	+	1901909,	1902770,	-11.1344	-11.0824	-11.0429	-10.8443	-10.8086	-10.8908	-11.7908	-11.5139	-11.3395	-11.0798	-10.8372	-11.6151	0.00268052	0.0142779	0.0301095	0.0714416	-0.242592	-0.777881	0.845225	0.583223
b4174	hflK	chr	+	4400060,	4401320,	-10.8844	-10.8932	-10.7808	-10.647	-10.6115	-10.631	-10.9487	-10.9728	-10.459	-10.8456	-10.6281	-10.8735	0.0189176	0.0481706	0.431296	0.499563	-0.217482	-0.245336	0.860065	0.843619
b0243	proA	chr	+	260726,	261980,	-12.5596	-12.5828	-12.5629	-12.3496	-12.4381	-12.3922	-12.4649	-12.5215	-12.2139	-12.5689	-12.3964	-12.4445	0.0150262	0.0413572	0.950146	0.958099	-0.172454	-0.0480746	0.887332	0.967226
b3731	atpC	chr	-	3913575,	3913995,	-9.68087	-9.72845	-9.64835	-9.48799	-9.52333	-9.58213	-9.6335	-9.56436	-9.54622	-9.68414	-9.52147	-9.5955	0.0133946	0.0388443	0.259295	0.335583	-0.162677	-0.0740348	0.893366	0.949977
b3189	murA	chr	-	3333256,	3334516,	-11.4585	-11.4325	-11.5552	-11.7615	-11.6283	-11.7763	-11.4543	-11.5063	-11.2139	-11.4866	-11.7039	-11.4342	0.0178697	0.0461021	0.0470065	0.0946713	0.217268	0.269696	1.16253	1.20555
b3559	glyS	chr	-	3720350,	3722420,	-10.0462	-10.0777	-10.0416	-10.2582	-10.2532	-10.3552	-10.1032	-9.88135	-9.8102	-10.0552	-10.2742	-9.97567	0.0124472	0.0367779	0.0424175	0.0885988	0.219024	0.298574	1.16395	1.22993
b3287	def	chr	+	3431711,	3432221,	-11.1086	-11.1989	-11.1944	-11.3839	-11.4424	-11.3828	-11.2214	-11.0649	-11.6904	-11.1733	-11.4092	-11.2214	0.00418873	0.0190132	0.720768	0.768362	0.23598	0.187867	1.17771	1.13908
b3764	yifE	chr	+	3946108,	3946447,	-8.85912	-8.8837	-8.89628	-9.17113	-9.11959	-9.1082	-9.10735	-9.05513	-9.2027	-8.88224	-9.13591	-9.10197	0.00114565	0.00854324	0.828675	0.86341	0.253665	0.0339362	1.19223	1.0238
b2323	fabB	chr	-	2438406,	2439627,	-8.34008	-8.36859	-8.33068	-8.62923	-8.64232	-8.5194	-8.34108	-8.42416	-8.0608	-8.34617	-8.61296	-8.32445	0.0170527	0.0448816	0.0863668	0.143883	0.266784	0.288508	1.20312	1.22138
b2908	pepP	chr	-	3051536,	3052862,	-12.1044	-12.0638	-12.0376	-12.3304	-12.3799	-12.3552	-12.0288	-12.3619	-12.0984	-12.0637	-12.3569	-12.1498	0.000457845	0.00481198	0.196668	0.268511	0.293184	0.207084	1.22534	1.15435
b2346	vacJ	chr	-	2462273,	2463029,	-11.3141	-11.4325	-11.4108	-11.6984	-11.6927	-11.6477	-11.4543	-11.4911	-11.5894	-11.3926	-11.6859	-11.4866	0.00688441	0.0256789	0.0387963	0.0846375	0.293348	0.199307	1.22548	1.14815
b2416	ptsI	chr	+	2532087,	2533815,	-9.31041	-9.2201	-9.36521	-9.6117	-9.63562	-9.5194	-9.43342	-9.51387	-9.70086	-9.29932	-9.60373	-9.49871	0.00679507	0.0255677	0.682102	0.733635	0.30441	0.105019	1.23491	1.07551
b1716	rplT	chr	-	1797416,	1797773,	-7.76851	-7.79123	-7.83047	-8.09713	-8.13627	-8.05718	-7.75713	-7.80698	-8.04735	-7.80062	-8.10637	-7.81442	0.000647639	0.0060012	0.119693	0.183584	0.305748	0.29195	1.23606	1.22429
b0179	lpxD	chr	+	200970,	201996,	-9.83252	-9.94175	-9.7808	-10.288	-10.0777	-10.1276	-9.94688	-9.98335	-9.82161	-9.84835	-10.1608	-9.94048	0.0195532	0.0494259	0.0400182	0.086252	0.312482	0.220348	1.24184	1.16501
b0772	ybhC	chr	-	805220,	806504,	-11.8917	-12.0275	-11.9402	-12.1851	-12.3557	-12.2496	-12.1345	-12.01	-12.071	-11.957	-12.2709	-12.0796	0.00922773	0.0302314	0.0402501	0.0864097	0.313944	0.191269	1.2431	1.14177
b2786	barA	chr	+	2913078,	2915835,	-12.8991	-12.7309	-12.7588	-13.1425	-13.0661	-13.1044	-13.1948	-12.9264	-12.892	-12.7837	-13.101	-13.0477	0.015916	0.043122	0.40706	0.476992	0.317239	0.0532283	1.24594	1.03758
b2699	recA	chr	-	2820729,	2821791,	-10.4079	-10.4012	-10.4544	-10.7679	-10.6776	-10.8516	-10.5808	-10.6415	-10.4152	-10.4237	-10.7427	-10.5762	0.013503	0.039046	0.064448	0.118527	0.318996	0.166517	1.24746	1.12235
b2926	pgk	chr	-	3069480,	3070644,	-9.61289	-9.71273	-9.65647	-10.0161	-9.94664	-10.026	-9.88171	-9.8497	-10.044	-9.66422	-9.98687	-9.89279	0.00101649	0.00805794	0.363521	0.436225	0.322654	0.0940782	1.25063	1.06738
b1855	lpxM	chr	-	1937245,	1938217,	-12.8844	-12.9978	-13.0698	-13.2113	-13.4212	-13.337	-12.8941	-12.9468	-13.477	-12.9951	-13.3254	-12.986	0.0145426	0.0406412	0.365233	0.437275	0.330292	0.33933	1.25727	1.26517
b2925	fbaA	chr	-	3068186,	3069266,	-9.55376	-9.49947	-9.5811	-9.95963	-9.79766	-9.9074	-9.66514	-9.73626	-9.64407	-9.54526	-9.87604	-9.68693	0.00802657	0.0277475	0.0295972	0.0709112	0.330779	0.189111	1.25769	1.14006
b0923	mukE	chr	+	974871,	975549,	-13.4694	-13.4809	-13.5705	-13.7615	-13.9406	-13.801	-13.5982	-13.5843	-13.551	-13.5125	-13.8459	-13.5862	0.0114663	0.0351393	0.0351739	0.0793614	0.333344	0.259712	1.25993	1.19724
b3894	fdoG	chr	-	4080794,	4083845,	-9.09275	-9.12496	-9.04029	-9.36913	-9.46272	-9.40392	-9.42566	-9.51196	-9.25199	-9.08276	-9.41661	-9.42838	0.000940825	0.00771378	0.863961	0.889113	0.333852	-0.0117699	1.26037	0.991875
b2215	ompC	chr	-	2309667,	2310771,	-6.15236	-6.11897	-6.16048	-6.50794	-6.46111	-6.5127	-6.1089	-6.12173	-6.32214	-6.14385	-6.48797	-6.14303	0.000112011	0.00287556	0.0400162	0.086252	0.34411	0.344937	1.26937	1.2701
b3309	rplX	chr	-	3445474,	3445789,	-8.67771	-8.70672	-8.73546	-9.09916	-9.01383	-9.0853	-8.79747	-8.66991	-8.87408	-8.71039	-9.0582	-8.76134	0.000801118	0.00691635	0.0260849	0.0654616	0.347818	0.296867	1.27263	1.22847
b0402	proY	chr	+	420209,	421583,	-12.6683	-12.8529	-12.7942	-13.265	-13.0661	-13.074	-13.1094	-12.6167	-12.477	-12.7802	-13.137	-12.8153	0.0136813	0.0394166	0.162385	0.231599	0.356814	0.321791	1.28059	1.24988
b3250	mreC	chr	-	3396896,	3398000,	-11.7723	-11.7855	-11.6698	-12.077	-12.154	-12.0296	-11.7515	-12.1454	-11.7765	-11.7354	-12.101	-11.884	0.00260414	0.0142094	0.260613	0.336648	0.365563	0.217009	1.28838	1.16232
b3702	dnaA	chr	-	3880348,	3881752,	-11.0875	-11.0155	-10.9156	-11.288	-11.4004	-11.4593	-11.1177	-11.4251	-11.1124	-10.993	-11.3694	-11.2192	0.00600962	0.0237653	0.251483	0.32764	0.376338	0.150212	1.29804	1.10973
b2415	ptsH	chr	+	2531785,	2532043,	-10.9746	-10.9631	-10.9602	-11.4395	-11.2588	-11.3643	-11.314	-11.2181	-11.0307	-10.9649	-11.3428	-11.2348	0.0171861	0.0450382	0.178545	0.249643	0.377899	0.108021	1.29945	1.07775
b1634	tppB	chr	+	1710792,	1712295,	-10.8203	-10.7115	-10.703	-11.1384	-11.0466	-11.2581	-11.0288	-10.994	-11.0307	-10.7354	-11.1189	-11.0166	0.00847528	0.0287902	0.163735	0.232795	0.383485	0.102345	1.30449	1.07352
b3163	nlpI	chr	-	3306061,	3306946,	-8.70319	-8.57457	-8.60841	-8.99327	-8.97946	-9.0853	-8.73059	-8.72296	-8.95969	-8.62026	-9.00446	-8.75932	0.0016816	0.010717	0.0933642	0.1523	0.3842	0.245145	1.30514	1.18521
b4226	ppa	chr	-	4447144,	4447675,	-9.6434	-9.65148	-9.62924	-9.95963	-10.0612	-10.1082	-9.83297	-9.7655	-9.90407	-9.64058	-10.0321	-9.81862	0.0104321	0.0328944	0.0248191	0.0635076	0.391562	0.213529	1.31181	1.15952
b1094	acpP	chr	+	1150837,	1151074,	-7.20428	-7.19404	-7.2373	-7.65891	-7.5775	-7.59084	-7.35453	-7.31373	-7.46573	-7.21362	-7.60926	-7.35552	0.000789748	0.00687081	0.0193805	0.0540136	0.395632	0.253737	1.31552	1.19229
b0954	fabA	chr	-	1015174,	1015693,	-8.47896	-8.51408	-8.45444	-8.85284	-8.86167	-8.96895	-8.56794	-8.66354	-8.37893	-8.48125	-8.87859	-8.57122	0.00273599	0.0144749	0.0344593	0.0784349	0.397338	0.307366	1.31708	1.23745
b0465	kefA	chr	+	485759,	489122,	-11.3043	-11.2965	-11.2272	-11.603	-11.7182	-11.6932	-11.2809	-11.3826	-11.4951	-11.2707	-11.6704	-11.3467	0.00125705	0.00907159	0.0251686	0.0641923	0.399693	0.323736	1.31923	1.25157
b1254	yciB	chr	-	1310374,	1310914,	-13.6809	-13.5653	-13.6332	-14.1094	-13.9649	-14.0151	-13.771	-13.9886	-13.629	-13.6212	-14.0258	-13.822	0.00210249	0.0121873	0.142616	0.2101	0.404547	0.203808	1.32367	1.15173
b2007	yeeX	chr	-	2077055,	2077385,	-11.625	-11.5352	-11.5067	-12.0931	-11.8645	-11.9175	-11.8941	-11.9781	-11.966	-11.5464	-11.9543	-11.9341	0.0140178	0.0396091	0.880203	0.901503	0.407947	0.0202352	1.3268	1.01412
b1641	slyB	chr	+	1717899,	1718367,	-9.29217	-9.45854	-9.28983	-9.74385	-9.7963	-9.74008	-9.09601	-9.13213	-9.44134	-9.34682	-9.76605	-9.15512	0.0115326	0.0351556	0.0361679	0.0807974	0.419227	0.610927	1.33721	1.52724
b2513	yfgM	chr	-	2636684,	2637305,	-12.2658	-12.2609	-12.2122	-12.5915	-12.7286	-12.6817	-12.1515	-12.4614	-12.2443	-12.2427	-12.6682	-12.2688	0.00362347	0.0173197	0.0373097	0.0824076	0.425506	0.39941	1.34304	1.31897
b0684	fldA	chr	-	710157,	710688,	-11.5194	-11.3183	-11.2859	-11.8893	-11.7442	-11.6703	-11.4971	-11.6004	-11.6696	-11.3543	-11.7802	-11.5578	0.016081	0.0433793	0.0973788	0.157212	0.425944	0.222413	1.34345	1.16668
b3733	atpG	chr	-	3915424,	3916288,	-9.66045	-9.75547	-9.69883	-10.1135	-10.1333	-10.1873	-9.92118	-9.92636	-9.76547	-9.70809	-10.1363	-9.899	0.00031482	0.00391277	0.0223998	0.0589548	0.428192	0.237284	1.34555	1.17877
b3554	yiaF	chr	-	3716356,	3717067,	-11.7723	-11.8059	-11.6173	-12.302	-12.086	-12.074	-11.8109	-11.7542	-12.4066	-11.7202	-12.1585	-11.863	0.0124312	0.0367779	0.523628	0.590353	0.438292	0.295502	1.355	1.22731
b3315	rplV	chr	-	3447922,	3448255,	-9.09696	-9.26792	-9.22498	-9.60158	-9.61509	-9.80408	-9.08782	-9.08317	-9.45016	-9.20523	-9.64479	-9.13404	0.00538913	0.0220926	0.0416743	0.0878358	0.439562	0.510746	1.35619	1.42479
b0557	borD	chr	-	577822,	578116,	-10.1044	-10.1821	-10.1885	-10.583	-10.6602	-10.5297	-10.5107	-10.4072	-10.8447	-10.1641	-10.6058	-10.5163	0.00118477	0.0087243	0.982277	0.983406	0.441736	0.0895047	1.35824	1.064
b2278	nuoL	chr	-	2391226,	2393068,	-8.88988	-8.86821	-8.80825	-9.26845	-9.3171	-9.3014	-9.14191	-9.19347	-8.76547	-8.84973	-9.29617	-9.09737	0.000378411	0.00432549	0.190323	0.262364	0.446444	0.198797	1.36268	1.14774
b1779	gapA	chr	+	1860794,	1861790,	-7.47518	-7.44849	-7.44693	-7.89638	-7.91013	-7.89573	-7.67201	-7.70325	-7.889	-7.45472	-7.90232	-7.71326	2.8992e-05	0.0013758	0.163256	0.232629	0.447595	0.189053	1.36377	1.14002
b2581	yfiF	chr	-	2715512,	2716550,	-12.247	-11.9688	-12.1251	-12.5464	-12.6381	-12.411	-11.8109	-11.9993	-11.4951	-12.0982	-12.5582	-11.822	0.0171217	0.0449876	0.0212659	0.0567604	0.459958	0.736202	1.3755	1.66579
b3095	yqjA	chr	+	3245794,	3246457,	-12.548	-12.574	-12.7072	-13.1594	-13.0926	-12.931	-12.682	-13.01	-12.892	-12.6181	-13.0833	-12.822	0.00742328	0.0267854	0.172283	0.242977	0.465165	0.261293	1.38048	1.19855
b0016	insL	chr	+	15444,	16557,	-13.364	-13.4809	-13.2922	-13.9541	-13.6978	-14.0151	-13.8519	-13.9062	-13.0984	-13.374	-13.8459	-13.7306	0.0175834	0.0457997	0.41455	0.483068	0.471905	0.115322	1.38694	1.08322
b3180	yhbY	chr	+	3325811,	3326105,	-10.7161	-11.0335	-10.8891	-11.4708	-11.3161	-11.3922	-11.0726	-11.1046	-11.6091	-10.8893	-11.3855	-11.1519	0.0164321	0.0439123	0.533527	0.599788	0.496241	0.233607	1.41053	1.17577
b2610	ffh	chr	-	2744455,	2745817,	-11.0259	-10.9235	-10.9328	-11.4447	-11.4212	-11.5609	-10.9825	-10.7953	-10.4413	-10.953	-11.4559	-10.8237	0.000956997	0.00776506	0.0358458	0.0803069	0.502929	0.632266	1.41709	1.55
b2042	galF	chr	-	2111457,	2112351,	-10.1044	-10.0531	-10.0257	-10.4708	-10.602	-10.6533	-10.2786	-10.2817	-10.252	-10.0552	-10.5623	-10.2757	0.00475163	0.0203307	0.0274318	0.0669131	0.507043	0.286529	1.42113	1.2197
b0434	yajG	chr	-	452812,	453391,	-12.548	-12.3858	-12.2122	-12.7744	-12.8475	-13.1044	-12.4971	-12.7723	-12.307	-12.353	-12.8659	-12.5578	0.0194531	0.0492938	0.0904183	0.148267	0.512928	0.308094	1.42694	1.23807
b3390	aroK	chr	-	3516564,	3517086,	-11.3793	-11.3073	-11.1564	-11.9763	-11.6826	-11.6817	-11.4077	-11.5215	-11.8447	-11.2634	-11.7826	-11.5055	0.0177651	0.0459838	0.317066	0.393132	0.519231	0.277159	1.43319	1.21181
b0182	lpxB	chr	+	203347,	204496,	-11.2658	-11.3858	-11.4669	-11.7423	-11.9833	-12.1044	-11.7132	-11.5139	-11.9409	-11.3846	-11.912	-11.6686	0.01688	0.044577	0.248494	0.325098	0.527464	0.243417	1.44139	1.18379
b3893	fdoH	chr	-	4079879,	4080782,	-10.2682	-10.3146	-10.3437	-10.7233	-10.8788	-11.0079	-10.8244	-10.7098	-10.6799	-10.3138	-10.8434	-10.7609	0.015702	0.0426898	0.25058	0.327007	0.529581	0.0824629	1.44351	1.05882
b4234	yjgA	chr	-	4455336,	4455888,	-12.0625	-12.1788	-12.2242	-12.6146	-12.739	-12.801	-12.5751	-12.0874	-12.4066	-12.1652	-12.7039	-12.3589	0.00162081	0.0105675	0.113448	0.17625	0.538625	0.344984	1.45259	1.27014
b2682	ygaZ	chr	+	2807638,	2808376,	-13.4263	-13.5653	-13.5705	-14.0142	-14.0402	-14.2666	-13.7195	-13.2948	-13.7989	-13.5301	-14.0716	-13.5634	0.00640057	0.0243876	0.0651184	0.11927	0.541498	0.508145	1.45548	1.42222
b2183	rsuA	chr	-	2277809,	2278505,	-12.6189	-12.7505	-12.7675	-13.1259	-13.3239	-13.411	-12.7195	-12.9264	-12.9409	-12.7219	-13.2642	-12.822	0.00840355	0.028671	0.0193927	0.0540136	0.542339	0.442257	1.45633	1.35873
b0472	recR	chr	+	493628,	494234,	-11.5194	-11.5784	-11.4598	-12.0452	-12.168	-11.8776	-11.2081	-11.6085	-11.0307	-11.5154	-12.0629	-11.3084	0.0154601	0.0421052	0.030954	0.0728931	0.547445	0.754473	1.4615	1.68702
b1334	fnr	chr	-	1396797,	1397550,	-10.5194	-10.8034	-10.5233	-11.0571	-11.2701	-11.1671	-11.1515	-11.0705	-10.9787	-10.6134	-11.1694	-11.0958	0.0117378	0.0355577	0.286943	0.36326	0.555941	0.0735209	1.47013	1.05228
b0914	msbA	chr	+	965843,	967592,	-11.0259	-11.1989	-10.9328	-11.6381	-11.6235	-11.54	-11.0605	-11.1692	-11.4413	-11.0447	-11.6122	-11.1498	0.0111039	0.0344331	0.0708561	0.126235	0.567494	0.462341	1.48195	1.37778
b3186	rplU	chr	-	3331161,	3331473,	-7.80381	-7.74405	-7.79054	-8.34541	-8.3799	-8.28826	-7.93168	-7.96693	-8.19341	-7.77761	-8.34917	-7.98013	0.000157329	0.00306708	0.0529928	0.103346	0.571563	0.369041	1.48613	1.29149
b1907	tyrP	chr	+	1987704,	1988916,	-12.7723	-12.9631	-13.059	-13.6619	-13.3718	-13.7521	-13.3625	-13.6838	-12.9409	-12.9471	-13.542	-13.3935	0.0117308	0.0355577	0.353508	0.426498	0.594877	0.14845	1.51034	1.10838
b3740	gidB	chr	-	3921079,	3921703,	-12.9902	-13.311	-13.3836	-13.8409	-13.76	-14.074	-13.2125	-12.8667	-13.892	-13.2476	-13.8459	-13.1541	0.0140173	0.0396091	0.192794	0.26507	0.598316	0.691823	1.51395	1.61532
b3783	rho	chr	+	3964439,	3965699,	-10.2682	-10.275	-10.3819	-11.0258	-10.905	-10.7401	-10.7386	-10.5215	-10.7765	-10.3144	-10.9134	-10.6626	0.00979133	0.0314851	0.13932	0.20641	0.598902	0.250768	1.51456	1.18984
b0416	nusB	chr	+	434360,	434780,	-11.9515	-11.918	-11.7632	-12.674	-12.3239	-12.5715	-11.8659	-11.9366	-11.8682	-11.8631	-12.4905	-11.891	0.0109388	0.0339884	0.0216158	0.0574708	0.627408	0.599491	1.54479	1.51518
b3318	rplW	chr	-	3449403,	3449706,	-9.20998	-9.1705	-9.36022	-9.91059	-9.84469	-9.92085	-9.28207	-9.28332	-9.61401	-9.25302	-9.88305	-9.32684	0.00320287	0.0158725	0.040412	0.0864097	0.630023	0.556208	1.54759	1.4704
b1277	ribA	chr	-	1336593,	1337184,	-12.9138	-12.8635	-12.9958	-13.5027	-13.6187	-13.5715	-12.9524	-12.8282	-13.477	-12.9276	-13.5664	-12.971	0.000261403	0.00365497	0.13418	0.199739	0.638784	0.595366	1.55702	1.51086
b3636	rpmG	chr	-	3809272,	3809440,	-8.82464	-8.81299	-8.98874	-9.68464	-9.43177	-9.51174	-9.37245	-9.25913	-9.76547	-8.88295	-9.53494	-9.38106	0.00266253	0.0142779	0.683272	0.734389	0.651994	0.153884	1.57134	1.11256
b3175	secG	chr	-	3320194,	3320527,	-7.69039	-7.72027	-7.68008	-8.39201	-8.31905	-8.40156	-8.2114	-8.15278	-8.30704	-7.69659	-8.36112	-8.2037	0.000255949	0.00364378	0.0611309	0.114648	0.664535	0.157421	1.58506	1.11529
b2746	ispF	chr	-	2869322,	2869802,	-13.7589	-13.7505	-13.6173	-14.5244	-14.3557	-14.1354	-13.7975	-13.8667	-13.4066	-13.6985	-14.3676	-13.7561	0.0189538	0.0481844	0.0258601	0.0652124	0.66903	0.611484	1.59	1.52783
b1825	yebO	chr	-	1906284,	1906572,	-10.4694	-10.3183	-10.5879	-11.1981	-11.086	-11.1671	-10.7776	-11.0427	-11.4066	-10.459	-11.1416	-10.9487	0.00555045	0.0225181	0.723495	0.77022	0.682614	0.19288	1.60505	1.14304
b2517	yfgB	chr	-	2641150,	2642305,	-11.8917	-11.7957	-11.8772	-12.5801	-12.5346	-12.4691	-11.6275	-12.2057	-11.7545	-11.852	-12.538	-11.8287	0.000109954	0.00287556	0.0586914	0.111057	0.685927	0.709211	1.60873	1.63491
b0471	ybaB	chr	+	493299,	493629,	-12.4585	-12.0762	-12.1307	-13.1259	-12.6776	-12.931	-12.2125	-12.4468	-12.155	-12.1883	-12.876	-12.2827	0.0176063	0.0457997	0.0194498	0.0540136	0.687759	0.593365	1.61078	1.50876
b2041	rfbB	chr	-	2109999,	2111085,	-11.3339	-11.605	-11.4386	-12.1594	-12.1333	-12.2327	-11.8177	-11.9162	-12.4413	-11.4653	-12.1616	-11.9305	0.00613248	0.0240688	0.609271	0.667216	0.696279	0.23115	1.62032	1.17377
b1124	potC	chr	-	1182048,	1182843,	-12.7064	-12.5395	-12.6657	-13.5027	-13.3083	-13.1354	-12.4543	-12.6004	-13.155	-12.6307	-13.3393	-12.5919	0.0118064	0.0356241	0.0954297	0.154863	0.708607	0.747384	1.63422	1.67875
b2528	iscA	chr	-	2657584,	2657908,	-13.038	-12.9517	-13.1826	-13.9838	-13.6577	-13.7521	-13.3429	-13.4614	-13.477	-13.0616	-13.7874	-13.4036	0.00479292	0.0204203	0.0453769	0.0925127	0.725793	0.383808	1.65381	1.30478
b2040	rfbD	chr	-	2109100,	2110000,	-12.5712	-12.3934	-12.6905	-13.4603	-13.2182	-13.1044	-12.6944	-12.8863	-13.0984	-12.5509	-13.2776	-12.8153	0.00710664	0.0261244	0.0797543	0.1362	0.726743	0.462341	1.6549	1.37778
b3741	mnmG	chr	-	3921766,	3923656,	-11.1344	-11.1821	-11.2062	-11.8753	-11.9833	-11.801	-11.4702	-11.7274	-11.1842	-11.179	-11.9068	-11.5082	0.00208332	0.0121734	0.100965	0.161338	0.727828	0.398682	1.65614	1.3183
b3965	trmA	chr	-	4160192,	4161293,	-12.0791	-12.1011	-12.2671	-13.0931	-12.8031	-12.7521	-12.3429	-12.5063	-12.307	-12.1584	-12.8914	-12.3935	0.00802545	0.0277475	0.0238788	0.0618559	0.732969	0.49784	1.66206	1.4121
b0315	yahA	chr	+	331594,	332683,	-13.2849	-13.548	-13.6822	-14.4813	-14.1471	-14.1354	-14.0929	-13.9062	-14.3395	-13.5242	-14.2576	-14.0557	0.00999898	0.0320213	0.449621	0.517059	0.733387	0.201951	1.66254	1.15025
b3650	spoT	chr	+	3820422,	3822531,	-10.2825	-10.0762	-10.0889	-10.8718	-10.8419	-10.9242	-10.5694	-10.3179	-10.2597	-10.1319	-10.8684	-10.4277	0.00407292	0.0187594	0.0285092	0.068791	0.736542	0.440703	1.66618	1.35727
b3493	pitA	chr	+	3635664,	3637164,	-10.1365	-10.2056	-10.0972	-10.8106	-10.9649	-10.8388	-10.0807	-10.1543	-9.63902	-10.1442	-10.8824	-10.0311	0.000479918	0.0049457	0.0223786	0.0589548	0.738165	0.851314	1.66805	1.80414
b2344	fadL	chr	+	2459327,	2460668,	-11.5138	-11.6689	-11.2827	-12.1938	-12.1893	-12.411	-11.6335	-11.7274	-12.155	-11.4667	-12.2314	-11.7337	0.00692482	0.0257584	0.100798	0.161236	0.764641	0.497648	1.69895	1.41191
b3124	garK	chr	-	3268646,	3269792,	-14.3043	-14.0335	-14.1478	-14.9838	-14.8475	-14.9585	-14.6944	-14.9062	-14.0984	-14.1448	-14.9173	-14.6566	0.00305691	0.0154923	0.269862	0.345904	0.77246	0.260707	1.70818	1.19807
b1269	rluB	chr	+	1324875,	1325751,	-11.6936	-12.0215	-11.9652	-12.5915	-12.8031	-12.7521	-11.6882	-11.8863	-11.2139	-11.9083	-12.7129	-11.6717	0.00429555	0.01933	0.0219987	0.0581926	0.804595	1.04124	1.74665	2.058
b1241	adhE	chr	-	1294668,	1297344,	-9.76222	-9.76292	-9.97154	-10.7202	-10.6651	-10.484	-10.3478	-10.4108	-10.2753	-9.84148	-10.6475	-10.3589	0.00137067	0.00949764	0.0396474	0.0859943	0.806014	0.288617	1.74837	1.22147
b3651	trmH	chr	+	3822537,	3823227,	-12.2284	-12.1788	-12.5178	-13.1765	-13.1333	-13.0151	-12.6216	-12.3757	-12.0984	-12.317	-13.1249	-12.4445	0.00782158	0.0276188	0.0295974	0.0709112	0.807937	0.680415	1.75071	1.6026
b0528	ybcJ	chr	-	555883,	556096,	-13.1387	-13.4012	-12.9652	-14.1425	-13.76	-14.1354	-13.4231	-13.3212	-13.629	-13.1493	-13.9597	-13.4137	0.00918195	0.0301445	0.0275261	0.0670388	0.81038	0.545999	1.75367	1.46003
b2567	rnc	chr	-	2701404,	2702085,	-12.4052	-12.1921	-12.4316	-13.1938	-13.1471	-13.074	-12.745	-12.5215	-12.2443	-12.3375	-13.1493	-12.5805	0.00319328	0.0158725	0.0418499	0.0880403	0.811823	0.568818	1.75543	1.48331
b0960	yccS	chr	-	1020952,	1023106,	-12.006	-12.2261	-12.1826	-12.999	-12.9527	-12.9585	-12.2486	-12.4614	-11.9915	-12.1493	-12.9705	-12.278	0.00483058	0.0204451	0.0311726	0.0731879	0.821187	0.692461	1.76686	1.61604
b2566	era	chr	-	2700502,	2701408,	-12.1562	-12.683	-12.2671	-13.1425	-13.106	-13.5297	-12.5866	-12.0427	-12.8447	-12.3661	-13.1929	-12.3985	0.0140293	0.0396091	0.0622714	0.116092	0.826829	0.794358	1.77378	1.73431
b2187	yejL	chr	+	2282150,	2282378,	-13.2849	-13.311	-13.4247	-14.1765	-14.0926	-14.411	-13.771	-13.6167	-13.892	-13.3478	-14.1803	-13.7306	0.00457047	0.0199926	0.020933	0.0565124	0.832508	0.449741	1.78078	1.36579
b0637	ybeB	chr	-	667941,	668259,	-12.7193	-12.5916	-12.7242	-13.5915	-13.5807	-13.2327	-12.7322	-12.8667	-12.307	-12.6756	-13.5101	-12.7055	0.0131806	0.0384373	0.019336	0.0540136	0.83452	0.804622	1.78326	1.74669
b3170	yhbC	chr	-	3315575,	3316034,	-11.8555	-11.6457	-11.6055	-12.4191	-12.7495	-12.3014	-12.021	-11.9676	-11.9915	-11.6805	-12.5299	-11.9974	0.01252	0.0369234	0.0640071	0.118063	0.849471	0.53254	1.80184	1.44647
b0196	rcsF	chr	-	219590,	219995,	-13.6809	-14.133	-13.9552	-14.4813	-15.0926	-14.8516	-14.508	-14.3757	-14.3395	-13.9354	-14.797	-14.4342	0.0188755	0.0481566	0.144342	0.211846	0.86162	0.362805	1.81708	1.28592
b1216	chaA	chr	-	1269971,	1271072,	-12.2849	-12.159	-12.0917	-13.1765	-12.8475	-13.1995	-12.8381	-12.5215	-13.2753	-12.163	-13.0258	-12.769	0.00628946	0.0241998	0.483847	0.553069	0.862838	0.256757	1.81861	1.19479
b1200	dhaK	chr	-	1248990,	1250061,	-11.7723	-12.1788	-11.849	-12.9249	-12.6978	-12.8516	-12.5751	-12.8093	-12.629	-11.9334	-12.8066	-12.6626	0.00758834	0.027193	0.19026	0.262364	0.873218	0.144039	1.83174	1.10499
b0415	ribE	chr	+	433870,	434341,	-11.6683	-11.7067	-11.5859	-12.6619	-12.4381	-12.489	-12.2304	-12.3212	-11.8216	-11.6482	-12.5259	-12.1928	0.00136992	0.00949764	0.102578	0.163582	0.877793	0.333182	1.83756	1.25979
b1905	ftnA	chr	+	1986739,	1987237,	-12.1918	-11.8635	-12.2242	-12.9249	-12.9895	-12.9865	-12.53	-12.1103	-12.629	-12.0809	-12.9651	-12.3786	0.0145856	0.0406412	0.0734045	0.128437	0.884223	0.58652	1.84577	1.50162
b1097	yceG	chr	+	1153334,	1154357,	-13.9288	-13.6549	-13.6822	-14.5244	-14.9406	-14.489	-14.267	-14.3212	-13.892	-13.732	-14.6859	-14.2236	0.0104567	0.0328944	0.0685072	0.12303	0.953916	0.462341	1.93712	1.37778
b4108	yjdM	chr	-	4324421,	4324757,	-14.3845	-13.8318	-14.059	-14.9838	-14.8933	-15.337	-13.8519	-13.8667	-14.629	-14.0489	-15.0034	-13.9487	0.0101919	0.0324399	0.0452221	0.0923345	0.954541	1.05468	1.93796	2.07726
b2527	hscB	chr	-	2656973,	2657489,	-13.8699	-13.3858	-14.0376	-14.6619	-14.5996	-15.074	-14.2304	-14.5525	-13.7989	-13.7388	-14.7039	-14.2597	0.0166902	0.0443837	0.100427	0.160807	0.965049	0.444194	1.95213	1.36055
b1524	yneH	chr	-	1610348,	1611275,	-14.1214	-13.6366	-13.8397	-14.5244	-15.0402	-14.9585	-14.7975	-14.3757	-13.892	-13.8301	-14.8163	-14.476	0.0106054	0.0332161	0.202642	0.274751	0.986228	0.34035	1.981	1.26606
b2620	smpB	chr	+	2752917,	2753400,	-13.038	-13.2399	-12.8963	-13.7615	-14.3881	-14.1354	-12.9524	-13.1454	-13.155	-13.0447	-14.0833	-13.0477	0.0142454	0.039979	0.0208852	0.0564873	1.03861	1.03553	2.05424	2.04986
b4290	fecB	chr	-	4511428,	4512331,	-14.5138	-14.2124	-14.4247	-15.1765	-15.6776	-15.489	-14.5524	-14.4911	-13.3395	-14.3687	-15.4408	-14.278	0.00623906	0.0241442	0.0647556	0.118883	1.07213	1.16278	2.10253	2.23889
b2174	yeiU	chr	+	2266875,	2267589,	-12.8133	-13.0577	-13.059	-14.3989	-14.0402	-13.801	-12.9085	-12.9468	-13.892	-12.991	-14.1069	-13.0321	0.0121085	0.0362561	0.105461	0.166652	1.11593	1.07486	2.16734	2.10652
b3728	pstS	chr	-	3908507,	3909548,	-13.1739	-13.7704	-13.8213	-15.2469	-14.5621	-14.7521	-13.6455	-13.6167	-13.477	-13.6088	-14.8163	-13.6093	0.0122321	0.0364867	0.0194877	0.0540136	1.20758	1.20708	2.30951	2.30871
b1631	rsxG	chr	+	1708227,	1708848,	-13.5138	-13.8111	-13.7501	-14.6146	-15.0926	-15.1995	-14.1948	-14.2181	-13.629	-13.7052	-14.9173	-14.104	0.00829266	0.0284164	0.0224591	0.0590117	1.21208	0.813248	2.31672	1.75716
b4291	fecA	chr	-	4512375,	4514700,	-12.7995	-12.8635	-12.6494	-13.6862	-14.3557	-14.074	-13.2856	-13.3757	-13.0984	-12.7594	-14.0258	-13.2873	0.0153228	0.0418768	0.0404459	0.0864097	1.26642	0.738465	2.40563	1.6684
b2066	udk	chr	-	2140330,	2140972,	-13.0708	-13.3256	-13.5401	-14.8684	-14.3239	-15.074	-13.3429	-13.5215	-13.4066	-13.3323	-14.6335	-13.4137	0.00912579	0.0300863	0.0223425	0.0589548	1.30117	1.21977	2.46428	2.3291
b1786	yeaJ	chr	+	1870064,	1871555,	-12.5365	-12.2469	-12.3503	-14.0142	-13.5807	-13.4495	-12.8381	-12.9062	-12.9915	-12.3582	-13.6949	-12.884	0.00688706	0.0256789	0.0385767	0.0843732	1.33666	0.810904	2.52567	1.75431
b2669	stpA	chr	-	2796112,	2796517,	-11.233	-11.2227	-11.2517	-12.4191	-12.6091	-12.9041	-11.9013	-11.7186	-11.8447	-11.2367	-12.587	-11.8254	0.00968901	0.0312845	0.017909	0.0510846	1.35029	0.761641	2.54963	1.69542
b2500	purN	chr	+	2620255,	2620894,	-13.7064	-13.7906	-13.4386	-15.0452	-14.8933	-15.1995	-14.0605	-14.2688	-13.155	-13.6212	-15.0034	-13.9487	0.000625294	0.00590546	0.062455	0.116296	1.38218	1.05468	2.60662	2.07726
b2704	srlB	chr	+	2825383,	2825755,	-12.0708	-11.9235	-12.6173	-13.4395	-13.6577	-14.1354	-12.8381	-12.9468	-12.7114	-12.2023	-13.6508	-12.8561	0.00639883	0.0243876	0.0365101	0.0813297	1.44846	0.794661	2.72917	1.73467
b2499	purM	chr	+	2619218,	2620256,	-12.4052	-12.8423	-12.3113	-14.5688	-13.739	-14.0151	-12.7579	-12.537	-12.8447	-12.5009	-14.0485	-12.6869	0.00826258	0.0283754	0.0190438	0.053459	1.54756	1.36158	2.92323	2.56966
b1628	rsxB	chr	+	1704371,	1704950,	-13.5138	-13.3858	-13.3049	-15.0452	-14.9895	-14.8516	-13.8519	-13.8667	-14.477	-13.3846	-14.9814	-13.9341	4.98445e-05	0.00169588	0.0405484	0.0865041	1.59681	1.0473	3.02474	2.06666
Below are not significant in WT/M, but are significant in C/M
b2672	ygaM	chr	+	2798155,	2798497,	-14.5138	-14.6549	-13.9156	-13.0931	-13.161	-13.1995	-14.3824	-14.2688	-14.3395	-14.2868	-13.1431	-14.3346	0.0313127	0.0681052	1.35889e-05	0.00144278
b2937	speB	chr	-	3080898,	3081819,	-12.8991	-12.4485	-12.8305	-13.3594	-13.4552	-13.4495	-12.4438	-12.5525	-12.551	-12.7019	-13.4185	-12.4974	0.0331969	0.0713251	5.23027e-05	0.0027302
b2091	gatD	chr	-	2169856,	2170897,	-9.94771	-9.88913	-9.89748	-9.80892	-9.73246	-9.65332	-10.9303	-10.8282	-10.9162	-9.90736	-9.74386	-10.891	0.0420457	0.0838771	6.55598e-05	0.00291601
b2000	flu	chr	+	2069562,	2072682,	-13.1214	-13.0577	-12.9958	-13.265	-13.739	-13.5715	-10.39	-10.5486	-10.1478	-13.0489	-13.518	-10.4048	0.0697732	0.120203	7.79014e-05	0.00297545
b3988	rpoC	chr	+	4183372,	4187596,	-7.90366	-7.8433	-7.93095	-7.95088	-7.96334	-7.9217	-7.6391	-7.63784	-7.61278	-7.89297	-7.95065	-7.63475	0.168051	0.233719	7.25668e-05	0.00297545
b0411	tsx	chr	-	430352,	431237,	-10.1628	-9.98615	-9.90472	-9.75984	-9.78276	-9.86129	-10.4702	-10.5254	-10.4413	-9.99607	-9.78918	-10.4853	0.0892376	0.143636	9.21831e-05	0.00320797
b1210	hemA	chr	+	1262936,	1264193,	-12.1129	-12.4485	-12.0323	-12.7108	-12.6978	-12.7763	-12.2125	-12.2688	-12.2139	-12.186	-12.7175	-12.2325	0.0487332	0.0931822	0.000132381	0.00391148
b4173	hflX	chr	+	4398694,	4399975,	-11.0219	-11.1921	-11.2242	-11.1467	-11.096	-11.1044	-11.3675	-11.4179	-11.4066	-11.1584	-11.1159	-11.391	0.680123	0.727012	0.000212317	0.00461683
b0429	cyoD	chr	-	446940,	447270,	-10.8991	-11.0793	-10.9452	-10.8139	-10.9257	-10.6817	-12.0288	-12.0649	-12.2753	-10.9779	-10.8347	-12.0756	0.137434	0.199457	0.000237418	0.00465325
b2957	ansB	chr	-	3097703,	3098750,	-14.2658	-14.0824	-13.7852	-14.2834	-14.0402	-14.5715	-11.4702	-11.5843	-11.9409	-13.9991	-14.2184	-11.5719	0.289459	0.357573	0.0002371	0.00465325
b2158	yeiH	chr	+	2247738,	2248788,	-13.7324	-14.2124	-13.9353	-14.2834	-14.3239	-14.411	-13.6216	-13.6838	-13.7114	-13.9669	-14.3254	-13.6566	0.103495	0.159993	0.000256374	0.00477955
b4032	malG	chr	-	4240648,	4241539,	-14.0543	-13.1459	-13.0271	-11.8753	-12.2929	-11.9724	-15.16	-14.6838	-14.629	-13.2769	-12.0658	-14.891	0.0384872	0.0783758	0.00030071	0.00517485
b3232	yhcM	chr	-	3376891,	3378019,	-13.2284	-13.9403	-13.8583	-13.0452	-12.8933	-12.9865	-14.0605	-14.0317	-14.0984	-13.6919	-12.9651	-14.0557	0.0842716	0.137182	0.000344469	0.00550448
b4280	yjhC	chr	+	4503309,	4504428,	-13.0543	-12.9631	-13.1251	-12.6263	-12.5437	-12.8261	-14.0605	-14.1219	-14.2139	-13.0489	-12.6249	-14.104	0.0260792	0.0597951	0.000539417	0.00698432
b3234	degQ	chr	+	3378764,	3380132,	-13.2284	-13.9631	-13.9353	-13.1938	-13.0926	-13.074	-14.0605	-13.8667	-13.9915	-13.7253	-13.1249	-13.9785	0.130863	0.191883	0.000527651	0.00698432
b2679	proX	chr	+	2805153,	2806146,	-11.8991	-12.2469	-12.2922	-11.5354	-11.6978	-11.4398	-12.7195	-12.8863	-12.5894	-12.1652	-11.5849	-12.7561	0.022636	0.0545849	0.000551306	0.0070766
b0755	gpmA	chr	-	786065,	786818,	-10.3666	-10.0886	-10.187	-9.99327	-10.0596	-10.0043	-10.457	-10.4251	-10.5321	-10.1953	-10.0244	-10.4562	0.131494	0.192448	0.000649824	0.00782788
b3781	trxA	chr	+	3963783,	3964113,	-8.96398	-9.11937	-8.96333	-9.0384	-9.03935	-9.0948	-8.78252	-8.76323	-8.69823	-9.01578	-9.04958	-8.76295	0.511882	0.573396	0.000929242	0.00947228
b2570	rseC	chr	-	2705343,	2705823,	-14.3438	-14.5828	-14.6657	-14.4813	-14.9895	-14.6589	-9.94503	-9.96759	-9.94714	-14.5479	-14.722	-9.95335	0.378433	0.447603	0.000955339	0.00952905
b2094	gatA	chr	-	2172618,	2173071,	-10.4997	-10.3535	-10.2594	-10.2673	-10.3657	-10.1671	-11.217	-11.2882	-11.0307	-10.351	-10.2894	-11.2125	0.315821	0.385484	0.000981651	0.00966833
b1133	mnmA	chr	-	1191889,	1192996,	-11.3948	-11.7407	-11.8305	-12.2469	-12.2777	-12.4301	-11.7195	-11.6167	-11.5894	-11.6756	-12.2945	-11.6626	0.0242433	0.0571761	0.001043	0.0100646
b0428	cyoE	chr	-	446038,	446929,	-9.20998	-9.17299	-9.1988	-9.04721	-8.99732	-8.89242	-10.0465	-10.01	-10.044	-9.19265	-8.99409	-10.033	0.0360799	0.07526	0.00104759	0.0100646
b2241	glpA	chr	+	2350668,	2352297,	-12.0959	-11.9291	-11.8351	-12.0219	-11.9833	-12.0296	-11.1948	-11.0427	-11.1407	-11.9315	-12.0062	-11.1309	0.526697	0.588728	0.00111422	0.0103247
b0115	aceF	chr	+	125694,	127587,	-10.3067	-10.0638	-10.244	-10.5437	-10.5483	-10.3461	-9.79414	-9.67951	-9.53679	-10.1941	-10.5052	-9.71248	0.0502063	0.0951853	0.00132944	0.011861
b1738	chbB	chr	-	1819322,	1819643,	-14.9288	-15.9403	-14.4247	-14.0452	-14.1751	-14.411	-15.3044	-15.4911	-15.2139	-14.9432	-14.1678	-15.354	0.179141	0.24526	0.00149375	0.0126444
b3356	yhfA	chr	-	3483435,	3483840,	-13.8699	-13.4012	-13.1139	-12.8684	-12.8251	-12.7048	-13.3824	-13.5843	-13.4066	-13.3793	-12.8163	-13.4549	0.0887537	0.143208	0.00157657	0.0128422
b3040	zupT	chr	+	3180571,	3181345,	-13.7858	-14.0824	-14.1251	-13.8964	-13.7182	-13.8516	-14.5982	-14.3757	-14.477	-14.0155	-13.8066	-14.4974	0.238951	0.306917	0.00158273	0.0128422
b0870	ltaE	chr	-	907515,	908517,	-13.5365	-13.3256	-12.6494	-12.5027	-12.5807	-12.6817	-13.1773	-13.0761	-13.2753	-13.0616	-12.5705	-13.1541	0.157275	0.221628	0.00168317	0.0134313
b0529	folD	chr	-	556097,	556964,	-12.6936	-12.9069	-12.3242	-13.077	-13.2929	-13.2327	-12.5751	-12.4179	-12.307	-12.5995	-13.1992	-12.476	0.0669301	0.116634	0.0018408	0.0136226
b3908	sodA	chr	+	4098832,	4099453,	-11.0625	-11.3037	-11.3017	-11.089	-11.0498	-11.2581	-11.682	-11.9062	-11.8447	-11.2367	-11.1025	-11.7821	0.429817	0.496382	0.00185156	0.0136226
b0807	ybiN	chr	+	841554,	842481,	-13.8699	-14.0335	-13.3049	-14.5688	-14.3557	-14.5715	-13.2125	-13.5215	-13.551	-13.6658	-14.4712	-13.3638	0.0628685	0.111624	0.00213517	0.0147321
b3313	rplP	chr	-	3446780,	3447191,	-8.8431	-8.84363	-8.96144	-9.11451	-9.12214	-9.0061	-8.74018	-8.71526	-8.60413	-8.88883	-9.09616	-8.71053	0.0219219	0.0533769	0.00226277	0.015063
b3301	rplO	chr	-	3442126,	3442561,	-8.8654	-8.8253	-8.82303	-9.06597	-8.99967	-8.91411	-8.51344	-8.59431	-8.52044	-8.83465	-9.0062	-8.54282	0.0605698	0.108559	0.002258	0.015063
b3221	yhcH	chr	-	3367035,	3367500,	-13.6558	-13.2538	-13.3177	-12.999	-12.8933	-12.5297	-14.9085	-14.2688	-14.7989	-13.374	-12.8509	-14.6327	0.0342431	0.0727666	0.00233728	0.015185
b3091	uxaA	chr	-	3239848,	3241336,	-14.4694	-14.1855	-14.5401	-13.4395	-13.76	-14.0151	-15.4649	-15.1692	-15.477	-14.3899	-13.6771	-15.354	0.036784	0.0761953	0.00249228	0.0158655
b3190	yrbA	chr	-	3334570,	3334825,	-14.9902	-14.3256	-14.7675	-14.4395	-14.3881	-14.337	-14.745	-14.6838	-14.629	-14.6466	-14.3964	-14.7055	0.255847	0.325472	0.00278816	0.0168907
b0627	tatE	chr	+	658169,	658373,	-13.1044	-12.7906	-13.1826	-13.5244	-13.6776	-13.5297	-13.0605	-13.1935	-13.155	-13.0155	-13.5912	-13.1205	0.0298374	0.0657861	0.00281115	0.0169318
b0735	ybgE	chr	+	773531,	773825,	-13.2658	-13.0335	-12.9552	-13.6146	-13.49	-13.3735	-12.771	-12.8473	-12.551	-13.0573	-13.5101	-12.7625	0.0281447	0.0632348	0.00295194	0.0171554
b2199	ccmC	chr	-	2293604,	2294342,	-13.8699	-14.3256	-13.7501	-14.3209	-14.4552	-14.5715	-13.4863	-13.6838	-13.7989	-13.9589	-14.4259	-13.5977	0.101344	0.157445	0.0029208	0.0171554
b1177	ycgJ	chr	+	1225822,	1226191,	-15.0543	-14.8111	-14.2671	-13.9249	-14.4552	-14.337	-15.745	-16.0761	-15.477	-14.6212	-14.2184	-15.8086	0.179482	0.24526	0.00301303	0.0172204
b3552	yiaD	chr	+	3714569,	3715229,	-13.0875	-13.2399	-13.4957	-13.7359	-14.1471	-13.8516	-13.0446	-12.8282	-12.7114	-13.2918	-13.9278	-12.9124	0.0203155	0.0503931	0.00305199	0.0172542
b2702	srlA	chr	+	2823853,	2824417,	-12.9288	-12.9069	-13.3437	-12.6862	-12.7814	-12.4691	-14.1261	-14.6838	-14.2139	-13.0701	-12.6815	-14.3155	0.0813748	0.134707	0.00304313	0.0172542
b3294	rplQ	chr	-	3437637,	3438021,	-8.24873	-8.13017	-8.11142	-8.26331	-8.3417	-8.27524	-7.80627	-7.83532	-7.6709	-8.15229	-8.29979	-7.79568	0.0740494	0.125908	0.00310728	0.0173167
b3358	yhfK	chr	+	3484812,	3486915,	-12.7193	-12.7309	-12.7157	-12.3496	-12.5077	-12.411	-12.7579	-12.9264	-12.8447	-12.7219	-12.4296	-12.8287	0.0219317	0.0533769	0.00331985	0.0180946
b0183	rnhB	chr	+	204492,	205089,	-14.2658	-13.7704	-13.0807	-14.4813	-14.6381	-14.411	-13.5524	-13.1219	-13.3395	-13.5479	-14.5339	-13.354	0.1394	0.201943	0.00333907	0.0180946
b2905	gcvT	chr	-	3047594,	3048689,	-11.5771	-11.6782	-11.3503	-11.3161	-11.0727	-11.1121	-12.0848	-11.8282	-11.7989	-11.5154	-11.1647	-11.9451	0.0431496	0.0853186	0.00374336	0.0196057
b1778	msrB	chr	-	1860039,	1860453,	-13.3845	-13.1989	-14.2922	-11.7679	-11.708	-11.7641	-12.8941	-12.9886	-13.2139	-13.5964	-11.7404	-12.971	0.0304932	0.0667864	0.00408485	0.0210423
b3093	exuT	chr	+	3243125,	3244544,	-15.3438	-14.8111	-14.2425	-13.061	-13.1751	-13.3735	-14.1261	-14.3757	-14.629	-14.6594	-13.1678	-14.278	0.0296661	0.0655972	0.004362	0.0216504
b1091	fabH	chr	+	1147981,	1148935,	-10.8449	-10.7629	-10.527	-11.1384	-11.2513	-11.059	-10.7195	-10.6625	-10.619	-10.6846	-11.1709	-10.6839	0.0249929	0.0582424	0.00453471	0.0221226
b4043	lexA	chr	+	4255137,	4255746,	-11.5194	-11.1689	-11.1622	-11.6984	-11.6676	-11.6146	-11.5025	-11.4395	-11.477	-11.2488	-11.6682	-11.476	0.0799869	0.133229	0.00462487	0.0224228
b2093	gatB	chr	-	2172303,	2172588,	-10.4914	-10.632	-10.4006	-10.5548	-10.4233	-10.484	-11.4491	-11.5843	-11.8216	-10.5009	-10.4818	-11.5466	0.806231	0.832272	0.00480412	0.0230775
b3795	yifK	chr	+	3978909,	3980295,	-13.3438	-13.918	-13.2062	-13.1765	-12.9771	-12.7521	-14.0288	-14.1692	-13.9915	-13.4555	-12.9979	-14.0716	0.124349	0.184229	0.00524738	0.0245318
b0354	yaiL	chr	+	375995,	376535,	-13.3438	-13.3705	-13.4957	-13.3209	-13.0402	-13.1044	-13.771	-13.8282	-14.0984	-13.4115	-13.1493	-13.8355	0.0802197	0.133359	0.00530556	0.0246317
b3666	uhpT	chr	-	3843798,	3845190,	-14.1214	-13.6736	-13.9552	-14.4813	-14.0402	-14.337	-13.143	-13.4037	-13.4066	-13.8893	-14.2444	-13.2688	0.115461	0.174024	0.00531667	0.0246317
b3730	glmU	chr	-	3911852,	3913223,	-10.075	-10.159	-10.3719	-10.5409	-10.5691	-10.5768	-10.2014	-10.3046	-10.2753	-10.2158	-10.5602	-10.2483	0.0532252	0.0989913	0.00538359	0.0247234
b2319	usg	chr	-	2433657,	2434671,	-13.21	-13.4168	-13.3437	-14.0142	-14.3239	-13.8516	-12.9377	-12.8282	-13.2753	-13.3323	-14.1069	-12.9414	0.020163	0.0501992	0.00557833	0.0253208
b2431	yfeX	chr	-	2547667,	2548567,	-12.1562	-12.5141	-12.4669	-12.9541	-12.7286	-12.6589	-12.143	-11.9468	-12.2443	-12.3953	-12.7922	-12.0837	0.0516094	0.0970233	0.00583421	0.0259556
b1219	ychN	chr	-	1272468,	1272822,	-12.1918	-11.9069	-12.2671	-11.674	-11.5346	-11.7282	-11.9901	-12.1219	-12.071	-12.1136	-11.6206	-12.0477	0.0305817	0.0668867	0.00599386	0.026219
b1093	fabG	chr	+	1149892,	1150627,	-8.75887	-8.67707	-8.69307	-8.76629	-8.82514	-8.82448	-8.58586	-8.6572	-8.56288	-8.70414	-8.8033	-8.60744	0.0424662	0.0840799	0.00598695	0.026219
b3405	ompR	chr	-	3533886,	3534606,	-12.583	-12.3858	-12.8397	-12.1012	-11.9895	-12.1044	-12.3235	-12.4323	-12.307	-12.6025	-12.0514	-12.3589	0.0457972	0.089423	0.00607802	0.026513
b1451	yncD	chr	-	1518986,	1521089,	-14.3043	-14.6549	-14.4527	-13.8684	-13.8251	-13.9041	-14.508	-14.5525	-14.3395	-14.478	-13.8559	-14.4974	0.0226544	0.0545849	0.00629578	0.0273108
b3734	atpA	chr	-	3916338,	3917880,	-8.37677	-8.19509	-8.28471	-8.54783	-8.46975	-8.45071	-8.25144	-8.2456	-8.29506	-8.27567	-8.49392	-8.25568	0.0396918	0.0804105	0.00655819	0.027984
b2262	menB	chr	-	2373983,	2374841,	-12.364	-12.7505	-12.4247	-13.0452	-12.9168	-12.9041	-11.9825	-12.1692	-11.7765	-12.5125	-12.9597	-12.0127	0.0523119	0.0978739	0.00652525	0.027984
b1308	pspE	chr	+	1367712,	1368027,	-11.4316	-12.0096	-12.1364	-11.3691	-11.4046	-11.1354	-11.9524	-11.9468	-11.7765	-11.8799	-11.3358	-11.9232	0.11034	0.168086	0.00654166	0.027984
b0902	pflA	chr	-	949562,	950303,	-12.6189	-12.9403	-12.4386	-13.2834	-13.4552	-13.0151	-12.1345	-12.5525	-12.155	-12.6434	-13.2979	-12.2734	0.0406766	0.0818759	0.00660703	0.0281158
b3850	hemG	chr	+	4032630,	4033176,	-14.0219	-13.918	-14.2425	-13.9541	-14.0146	-13.6589	-14.4649	-14.6167	-14.7989	-14.0659	-13.9173	-14.5634	0.274409	0.34378	0.00712604	0.029663
b3926	glpK	chr	-	4113736,	4115245,	-9.07705	-9.0577	-9.05901	-8.90169	-8.96486	-9.0853	-9.41794	-9.43768	-9.35595	-9.06319	-8.96374	-9.41561	0.272212	0.341318	0.0072062	0.0297162
b1915	yecF	chr	+	1993841,	1994066,	-14.0219	-13.9403	-14.6332	-15.2469	-14.7182	-15.337	-14.0288	-13.8282	-13.4066	-14.1999	-15.0034	-13.8492	0.037204	0.0764396	0.00724704	0.0297871
b1714	pheS	chr	-	1795982,	1796966,	-10.8484	-10.783	-10.5937	-10.9801	-10.9588	-11.0296	-10.6851	-10.7723	-10.7989	-10.7211	-10.98	-10.7321	0.0741838	0.125945	0.00736603	0.030118
b0369	hemB	chr	-	387976,	388951,	-12.1214	-11.7704	-11.8724	-12.379	-12.168	-12.216	-11.845	-11.7452	-11.5701	-11.895	-12.251	-11.7658	0.0648293	0.113815	0.00743287	0.0302131
b1708	nlpC	chr	-	1790290,	1790755,	-12.5596	-12.8008	-12.9958	-12.2927	-12.3799	-12.337	-13.1773	-12.9062	-13.0984	-12.805	-12.3393	-13.0636	0.0655655	0.11485	0.00755019	0.0304495
b0795	ybhG	chr	-	828196,	829195,	-14.4694	-15.3554	-14.4812	-14.077	-13.8933	-13.801	-14.7975	-14.5525	-14.9915	-14.7253	-13.9383	-14.7306	0.093195	0.147609	0.00762368	0.0305337
b1176	minC	chr	-	1224607,	1225303,	-12.8133	-12.5057	-12.3972	-12.3114	-12.2182	-12.0891	-12.7842	-12.6332	-12.9409	-12.533	-12.2249	-12.7497	0.0799025	0.133229	0.00792677	0.0311542
b0759	galE	chr	-	790261,	791278,	-12.3539	-12.0516	-12.503	-11.9035	-12.1751	-12.1512	-12.7842	-13.0317	-13.2753	-12.2943	-12.0658	-12.9341	0.237782	0.306092	0.00795765	0.0311542
b0160	dgt	chr	+	179236,	180754,	-14.5138	-14.4168	-14.1944	-14.6146	-13.8251	-14.1354	-15.9674	-15.7542	-15.477	-14.3478	-14.131	-15.8086	0.520241	0.581927	0.00795113	0.0311542
b2553	glnB	chr	-	2685091,	2685430,	-10.9363	-10.918	-11.0323	-10.8375	-10.8475	-10.7702	-11.3824	-11.4987	-11.2597	-10.9669	-10.8286	-11.4036	0.0345255	0.0729649	0.00857963	0.0326384
b2432	yfeY	chr	-	2548662,	2549238,	-13.4477	-13.1722	-13.7501	-12.8006	-13.0146	-12.9585	-13.3235	-13.4911	-13.2753	-13.4499	-12.9225	-13.3736	0.0710577	0.121701	0.00870466	0.0329525
b2143	cdd	chr	+	2229865,	2230750,	-13.3043	-12.8318	-12.3702	-12.2113	-12.5166	-12.3191	-13.0929	-12.9264	-12.7989	-12.7253	-12.3605	-12.986	0.206137	0.271759	0.0088107	0.0332471
b3247	rng	chr	-	3394347,	3395817,	-11.4859	-11.7309	-11.5898	-11.3448	-11.4812	-11.4495	-11.8109	-11.7815	-11.7765	-11.6088	-11.424	-11.7953	0.114085	0.172546	0.00898268	0.0336528
b1854	pykA	chr	+	1935672,	1937115,	-10.7259	-10.8136	-10.8009	-10.6649	-10.6552	-10.54	-10.9978	-10.9728	-10.966	-10.7855	-10.6356	-10.9841	0.0361402	0.07526	0.00917961	0.0339406
b3094	exuR	chr	+	3244673,	3245450,	-13.5596	-13.2538	-13.0807	-12.674	-13.002	-12.801	-13.53	-13.4614	-13.2753	-13.2524	-12.836	-13.4654	0.0569583	0.104244	0.00918954	0.0339406
b0606	ahpF	chr	+	638975,	640541,	-10.9401	-10.8716	-11.0644	-10.8477	-10.7157	-10.631	-11.1948	-11.1752	-11.0846	-10.9629	-10.745	-11.1711	0.0556248	0.10248	0.00926117	0.0340446
b2960	trmI	chr	-	3100154,	3100874,	-12.247	-12.4325	-11.9602	-12.8964	-12.6876	-12.7282	-12.4543	-12.2948	-12.2139	-12.1836	-12.7684	-12.3589	0.038409	0.0783183	0.00938288	0.0344112
b1798	leuE	chr	-	1878144,	1878783,	-14.5138	-14.133	-14.4812	-14.077	-14.49	-14.074	-14.8519	-15.0761	-15.2139	-14.3582	-14.2444	-14.9785	0.428646	0.495395	0.0102355	0.0371037
b0827	moeA	chr	-	864351,	865587,	-13.4694	-13.531	-13.4247	-14.2834	-13.8933	-14.411	-13.3824	-13.0537	-13.2753	-13.4724	-14.1189	-13.2415	0.0392075	0.0796355	0.0103144	0.0372175
b2494	yfgC	chr	+	2614115,	2615579,	-13.2849	-13.5828	-13.5252	-13.1425	-12.905	-13.1354	-13.6697	-13.5843	-13.4066	-13.478	-13.0314	-13.5977	0.0293398	0.0650795	0.0110005	0.038644
b1812	pabB	chr	+	1892828,	1894190,	-14.7064	-13.9631	-13.6822	-14.2469	-14.0146	-14.074	-14.508	-14.6167	-14.477	-13.991	-14.1069	-14.5411	0.987732	0.989627	0.0110014	0.038644
b0154	hemL	chr	-	173601,	174882,	-11.4316	-11.2434	-11.6494	-11.7486	-11.7868	-11.8776	-11.2349	-11.2057	-10.9285	-11.4416	-11.7898	-11.1754	0.0786229	0.131542	0.0113177	0.0391246
b3300	secY	chr	-	3440787,	3442119,	-6.81159	-6.77073	-6.80952	-6.82481	-6.77806	-6.80798	-6.60875	-6.62593	-6.69364	-6.79646	-6.80073	-6.62709	0.756305	0.79209	0.0115464	0.0397018
b1818	manY	chr	+	1901105,	1901906,	-11.4	-11.596	-11.5401	-11.1217	-11.0434	-11.3643	-11.8941	-11.7542	-11.8216	-11.5213	-11.1295	-11.8321	0.0525022	0.0981127	0.0118005	0.0402064
b1870	cmoA	chr	+	1950725,	1951469,	-13.8699	-14.1855	-14.059	-14.8684	-14.9895	-14.489	-14.0929	-13.8667	-13.551	-14.0489	-14.836	-13.9196	0.0201045	0.0501602	0.012286	0.041177
b2069	yegD	chr	+	2145697,	2147050,	-14.2658	-14.159	-14.6332	-14.8139	-15.5256	-15.074	-14.1261	-14.0317	-13.477	-14.3582	-15.1431	-13.9785	0.0421896	0.0840222	0.0122708	0.041177
b3098	yqjD	chr	+	3247396,	3247702,	-13.2849	-13.7704	-14.1478	-13.0142	-13.1751	-13.2666	-13.6944	-13.7542	-13.477	-13.7525	-13.131	-13.6808	0.135821	0.197672	0.0123847	0.041177
b3068	mug	chr	-	3212988,	3213495,	-14.9288	-14.3858	-14.2671	-14.2834	-13.8475	-13.9585	-14.5982	-15.0761	-14.9915	-14.4555	-14.0146	-14.8086	0.121126	0.180823	0.0124316	0.0412456
b2294	yfbU	chr	-	2410121,	2410616,	-13.3438	-13.8743	-13.4108	-13.1594	-13.1196	-13.2666	-13.9085	-13.6498	-13.9915	-13.536	-13.1616	-13.822	0.155629	0.219761	0.0125214	0.0413982
b1125	potB	chr	-	1182839,	1183667,	-12.6311	-13.1202	-12.8122	-13.6381	-13.5077	-13.7048	-12.9674	-12.4911	-12.6696	-12.8594	-13.5912	-12.7369	0.0212605	0.0523489	0.0126076	0.0415651
b0181	lpxA	chr	+	202559,	203348,	-9.62806	-9.70792	-9.55429	-9.88757	-10.0289	-9.8324	-9.41665	-9.4179	-9.43695	-9.62517	-9.937	-9.42007	0.0200851	0.0501602	0.0129913	0.0423842
b2936	yggG	chr	+	3079934,	3080693,	-14.1214	-13.918	-14.4247	-13.302	-13.3557	-13.411	-14.0929	-13.9062	-13.7989	-14.1539	-13.3463	-13.9785	0.0278992	0.062954	0.0132066	0.0427303
b0677	nagA	chr	-	700825,	701974,	-12.1739	-11.7906	-11.9552	-11.4089	-11.5211	-11.54	-11.9377	-12.0988	-12.2753	-11.9471	-11.4828	-12.0399	0.0363563	0.0755092	0.013756	0.0437881
b2796	sdaC	chr	+	2926250,	2927540,	-8.63341	-8.67005	-8.60939	-8.68159	-8.78276	-8.74606	-8.61572	-8.5614	-8.54622	-8.63642	-8.73808	-8.58581	0.0574145	0.104789	0.0139024	0.043836
b3838	tatB	chr	+	4020240,	4020756,	-12.2564	-12.4891	-12.4386	-12.6862	-12.5166	-12.9041	-12.2304	-12.0988	-11.892	-12.406	-12.6464	-12.1288	0.0933669	0.147609	0.0140565	0.0442017
b0758	galT	chr	-	789205,	790252,	-13.8991	-13.8743	-13.3972	-13.7359	-13.8251	-13.337	-14.9674	-15.2688	-14.477	-13.6723	-13.6859	-14.9785	0.703362	0.745392	0.0140896	0.0442171
b1174	minE	chr	-	1223501,	1223768,	-13.1739	-13.5141	-13.8772	-12.8546	-12.905	-13.1671	-13.6944	-13.7542	-13.7114	-13.5419	-12.933	-13.718	0.0975406	0.153055	0.0141697	0.0443558
b2895	fldB	chr	+	3037876,	3038398,	-12.5025	-12.6736	-12.849	-12.8546	-13.0402	-12.931	-12.3725	-12.6498	-12.4413	-12.6919	-12.949	-12.476	0.0983528	0.15402	0.0146644	0.0454742
b0835	yliG	chr	-	875932,	877258,	-13.4263	-12.9746	-13.4108	-14.9838	-14.1751	-14.2666	-12.9524	-13.4323	-12.892	-13.2476	-14.4408	-13.0958	0.0234604	0.0558711	0.014774	0.0456888
b3084	rlmG	chr	-	3232760,	3233897,	-13.5138	-13.6924	-13.059	-13.9541	-14.4212	-14.1995	-13.5982	-13.4323	-13.0984	-13.3687	-14.1929	-13.4549	0.0340581	0.0727075	0.0152314	0.0465868
b3401	hslO	chr	+	3527795,	3528674,	-12.7456	-12.6549	-12.7414	-12.379	-12.7707	-12.6366	-13.4649	-13.3757	-13.4066	-12.7118	-12.5912	-13.4239	0.412383	0.480858	0.015346	0.0468456
b2914	rpiA	chr	-	3056687,	3057347,	-11.1214	-11.4051	-11.6534	-11.9178	-12.0083	-12.0151	-11.5982	-11.5139	-11.3232	-11.4142	-11.9759	-11.5245	0.0569644	0.104244	0.0155122	0.0470128
b2265	menF	chr	-	2377369,	2378665,	-13.5138	-13.311	-13.2547	-13.8684	-13.6381	-13.6146	-13.143	-13.4037	-13.2139	-13.3375	-13.7129	-13.2415	0.0371442	0.0764396	0.0156828	0.0473549
b2133	dld	chr	+	2220206,	2221922,	-13.2284	-13.133	-13.0483	-13.1259	-12.6381	-12.7048	-13.8519	-13.6838	-13.629	-13.1224	-12.8115	-13.7561	0.167027	0.232708	0.0156943	0.0473549
b2511	der	chr	-	2633905,	2635378,	-12.0875	-12.1394	-12.2796	-13.2113	-12.8933	-12.7048	-12.0132	-12.0761	-12.2753	-12.179	-12.9597	-12.0716	0.0234073	0.0558711	0.0159043	0.0473631
b1225	narH	chr	+	1282826,	1284365,	-13.364	-13.3256	-13.4247	-15.3209	-17.0402	-15.337	-11.9524	-12.0988	-11.6491	-13.374	-15.8559	-11.9524	0.0470047	0.0908758	0.0158107	0.0473631
b0124	gcd	chr	-	138834,	141225,	-14.7064	-14.0335	-14.1478	-13.5464	-13.5807	-13.4495	-14.3044	-14.7542	-14.7989	-14.2283	-13.542	-14.5191	0.0611178	0.109258	0.0157354	0.0473631
b2260	menE	chr	-	2371669,	2373025,	-13.6069	-13.3554	-13.5705	-14.6619	-13.8031	-13.9585	-13.1094	-12.7186	-12.4066	-13.5009	-14.0951	-12.8424	0.130431	0.191609	0.0157808	0.0473631
b2817	amiC	chr	-	2945778,	2947032,	-11.9592	-11.9403	-11.8259	-11.9178	-11.8363	-11.6477	-12.1261	-12.2432	-12.4066	-11.8988	-11.8261	-12.2059	0.317164	0.386822	0.015929	0.0473631
b1749	xthA	chr	+	1830451,	1831258,	-12.9592	-12.7805	-12.9753	-13.265	-13.1471	-13.1995	-12.9524	-12.7363	-12.7545	-12.9007	-13.1992	-12.8424	0.0231258	0.0554593	0.0160423	0.0475799
b1117	lolD	chr	+	1175841,	1176543,	-13.7324	-13.7309	-13.3437	-14.1425	-14.3557	-13.9585	-13.3625	-13.6498	-13.629	-13.5659	-14.1929	-13.4974	0.0341753	0.0727666	0.0161698	0.0478569
b1276	acnA	chr	+	1333854,	1336530,	-13.5365	-13.4646	-13.3836	-13.061	-12.6577	-13.1044	-13.6944	-13.7907	-13.892	-13.4499	-12.876	-13.7561	0.0564605	0.103776	0.0161974	0.0478569
b4155	poxA	chr	+	4380665,	4381643,	-12.5712	-12.6642	-13.0062	-12.8684	-13.2476	-13.1671	-12.4026	-12.2817	-12.3726	-12.7628	-13.0833	-12.354	0.120329	0.179976	0.0162705	0.0478941
b2092	gatC	chr	-	2170944,	2172300,	-7.95917	-8.01368	-7.98267	-7.94538	-7.9425	-7.88911	-8.54674	-8.54473	-8.30904	-7.98721	-7.93303	-8.50851	0.0708332	0.121652	0.0165762	0.0486111
b1857	znuA	chr	-	1939674,	1940607,	-12.4914	-12.2056	-12.5705	-11.9394	-12.0466	-11.7521	-12.4543	-12.4762	-12.3726	-12.4142	-11.9463	-12.4497	0.024466	0.0574328	0.0168572	0.0491591
b0526	cysS	chr	+	553833,	555219,	-11.0875	-11.0008	-10.9652	-11.1808	-11.4004	-11.337	-10.9267	-10.8569	-10.892	-11.0083	-11.3047	-10.8963	0.0284953	0.063657	0.0170048	0.0492067
b1871	cmoB	chr	+	1951465,	1952437,	-13.2658	-13.0096	-12.8963	-13.1938	-13.4725	-13.6146	-12.9377	-12.6667	-12.7545	-13.0238	-13.3892	-12.8086	0.0895569	0.143695	0.017	0.0492067
b2125	yehT	chr	-	2210264,	2210984,	-14.3043	-14.6549	-14.059	-14.1425	-13.7814	-14.1354	-14.745	-14.6838	-14.477	-14.3069	-13.9705	-14.6808	0.211449	0.277185	0.0169482	0.0492067
b3529	yhjK	chr	-	3681652,	3683608,	-13.7589	-13.7309	-13.3177	-13.0931	-13.1751	-13.1671	-13.6697	-13.4323	-13.551	-13.5598	-13.1431	-13.5634	0.0804717	0.133636	0.0173151	0.0497532
b0082	mraW	chr	+	90093,	91035,	-10.963	-10.9152	-11.0403	-10.8106	-10.9079	-10.6989	-11.186	-11.1219	-11.071	-10.9759	-10.8298	-11.1456	0.0910811	0.145693	0.0172894	0.0497532
Below are not significant in either
b0480	ushA	chr	+	504137,	505790,	-12.8133	-13.4809	-13.6822	-12.8546	-13.0531	-13.1354	-13.4231	-13.5843	-13.3395	-13.3426	-12.9924	-13.4654	0.358959	0.427476	0.0175406	0.0503088
b0784	moaD	chr	+	818270,	818516,	-14.6069	-14.8529	-14.0376	-14.4813	-14.5621	-14.6589	-13.7975	-14.1692	-13.892	-14.4223	-14.5501	-13.9341	0.805948	0.832272	0.0179045	0.0510846
b2156	lysP	chr	-	2245084,	2246554,	-11.0875	-11.1722	-11.2062	-11.7423	-11.4638	-11.54	-10.8008	-11.0537	-11.1842	-11.163	-11.5746	-10.9396	0.0226566	0.0545849	0.0180006	0.0511878
b2064	asmA	chr	-	2137782,	2139636,	-11.8627	-11.632	-11.6946	-11.4551	-11.4509	-11.2496	-11.7908	-11.7542	-11.6491	-11.7135	-11.4111	-11.7561	0.0234882	0.0558711	0.0180105	0.0511878
b3793	wzyE	chr	+	3976623,	3977976,	-13.0219	-13.7704	-13.1944	-13.9249	-13.9406	-13.8516	-13.3235	-13.4323	-13.0984	-13.317	-13.9173	-13.325	0.123555	0.183226	0.018174	0.0515587
b0149	mrcB	chr	+	164729,	167264,	-10.9941	-11.3819	-11.1709	-11.2973	-11.3122	-11.0665	-10.845	-10.814	-10.5415	-11.1906	-11.256	-10.7854	0.771438	0.804325	0.0182338	0.0516349
b3024	ygiW	chr	-	3167305,	3167698,	-13.7064	-13.918	-13.5401	-13.5027	-13.4381	-13.6146	-14.3824	-14.1219	-14.629	-13.7052	-13.4944	-14.3155	0.19646	0.262505	0.0186905	0.0528327
b0891	lolA	chr	+	936594,	937206,	-12.8413	-12.8959	-13.1251	-13.4813	-13.2476	-13.3014	-12.9085	-12.9886	-13.044	-12.9669	-13.3393	-12.9561	0.0271915	0.0618025	0.0188358	0.0531475
b0785	moaE	chr	+	818517,	818970,	-14.2658	-14.133	-14.0807	-15.0452	-14.5996	-15.489	-13.5751	-13.5843	-13.3395	-14.1448	-14.8965	-13.5411	0.0689438	0.119299	0.0190493	0.053459
b3628	rfaB	chr	-	3801080,	3802190,	-13.1739	-13.7704	-13.3307	-13.6146	-13.2037	-13.2666	-13.9377	-14.1219	-14.0984	-13.4223	-13.3534	-14.0243	0.788611	0.816236	0.0190081	0.053459
b3560	glyQ	chr	-	3722429,	3723341,	-11.2376	-11.2399	-11.3569	-11.519	-11.7922	-11.8261	-11.1472	-11.3688	-11.0175	-11.2843	-11.6926	-11.2015	0.0326592	0.0704466	0.0194808	0.0540136
b3867	hemN	chr	+	4050067,	4051441,	-12.9746	-12.6549	-12.6575	-13.229	-13.2625	-13.2666	-12.3824	-12.7363	-12.551	-12.732	-13.251	-12.5245	0.042258	0.0840222	0.0197148	0.0545466
b1275	cysB	chr	+	1331878,	1332853,	-13.3438	-13.0577	-13.3569	-12.5576	-12.8251	-12.8516	-13.9978	-13.5525	-13.4066	-13.2427	-12.7266	-13.7306	0.0199939	0.0501602	0.0198264	0.0547585
b0423	thiI	chr	+	440772,	442221,	-11.7656	-11.9517	-11.7852	-12.5915	-12.7182	-12.1995	-11.7645	-11.8473	-11.551	-11.8356	-12.5582	-11.7593	0.0372332	0.0764396	0.0200101	0.0550718
b1777	yeaC	chr	-	1859725,	1859998,	-13.8699	-14.0335	-13.0376	-12.9106	-13.1471	-13.2666	-13.8519	-13.5215	-13.9915	-13.5242	-13.0774	-13.7433	0.216219	0.281931	0.0201574	0.0553798
b1725	yniA	chr	+	1805819,	1806680,	-14.4263	-15.4168	-14.0376	-12.8273	-12.9527	-13.1354	-14.3044	-13.7907	-13.7114	-14.5009	-12.9383	-14.0089	0.0506581	0.0955789	0.0202771	0.0556112
b1205	ychH	chr	+	1258013,	1258292,	-13.583	-14.0824	-14.5705	-12.4499	-12.3557	-12.1995	-12.7322	-12.6332	-12.7545	-14.0917	-12.3569	-12.6993	0.0203199	0.0503931	0.0204249	0.0558082
b1286	rnb	chr	-	1345001,	1346936,	-11.3793	-11.4012	-11.503	-11.8614	-11.9527	-12.2496	-11.3675	-11.4395	-11.2911	-11.4347	-11.9705	-11.3811	0.0274497	0.0622039	0.0204203	0.0558082
b1114	mfd	chr	-	1169740,	1173187,	-11.9902	-12.2821	-12.5782	-11.9763	-11.8086	-12.0442	-12.314	-12.4037	-12.6696	-12.3043	-11.912	-12.3935	0.172346	0.238286	0.0204559	0.0558082
b0809	glnQ	chr	-	844963,	845686,	-14.1562	-14.0096	-13.7328	-13.2113	-13.4381	-13.489	-14.4231	-14.1219	-13.892	-13.9276	-13.3605	-14.2236	0.0221112	0.053673	0.0205267	0.0559039
b2297	pta	chr	+	2412768,	2414913,	-11.0259	-11.2056	-11.0563	-11.1894	-11.2476	-11.3014	-10.5694	-10.629	-10.2215	-11.0982	-11.2363	-10.5328	0.0956208	0.150344	0.0206323	0.055997
b4039	ubiC	chr	+	4250528,	4251026,	-14.6069	-13.9631	-14.6015	-13.3209	-13.1333	-13.6589	-14.16	-14.3757	-13.892	-14.3478	-13.2911	-14.1884	0.0215033	0.0526983	0.0209666	0.0565124
b4529	ydbJ	chr	+	1439081,	1439348,	-14.3845	-15.0335	-13.9958	-13.3989	-13.6978	-13.2666	-14.267	-14.3757	-13.892	-14.3899	-13.4944	-14.2415	0.0618096	0.109993	0.0210545	0.0566519
b0915	lpxK	chr	+	967588,	968575,	-12.2754	-12.311	-12.4247	-12.5354	-12.8933	-12.6366	-12.2214	-12.2432	-12.044	-12.3452	-12.7039	-12.2015	0.0642925	0.113398	0.0211411	0.05669
b1920	fliY	chr	-	1997608,	1998409,	-13.8413	-15.0335	-14.5401	-13.302	-13.2777	-13.7521	-14.0929	-14.2688	-14.3395	-14.4555	-13.3676	-14.1884	0.0797088	0.133217	0.0211291	0.05669
b0660	ybeZ	chr	-	691560,	692601,	-12.7456	-13.0455	-13.1826	-12.5801	-12.4466	-12.5297	-13.1094	-13.2181	-13.551	-13.0114	-12.5101	-13.2059	0.0569017	0.104244	0.0211859	0.0567131
b3744	asnA	chr	+	3925177,	3926170,	-12.7324	-12.8851	-13.3049	-12.6381	-12.8702	-12.9041	-13.5524	-13.6838	-13.2139	-12.991	-12.7874	-13.5411	0.439888	0.505774	0.0212761	0.0567604
b1807	yeaZ	chr	-	1888595,	1889291,	-12.3845	-12.4891	-12.2671	-12.999	-12.7182	-13.1044	-12.2856	-12.3757	-12.2443	-12.3713	-12.8862	-12.3108	0.0219374	0.0533769	0.0219654	0.0581926
b2599	pheA	chr	+	2735766,	2736927,	-13.583	-13.07	-12.9452	-12.6619	-12.5901	-12.074	-13.267	-13.2432	-13.892	-13.1313	-12.4983	-13.3346	0.0482139	0.0926417	0.0226976	0.0595384
b1863	ruvC	chr	-	1944878,	1945400,	-11.9288	-11.7309	-11.7414	-11.8823	-12.255	-12.3191	-11.6515	-11.5763	-11.307	-11.7837	-12.1189	-11.5691	0.106208	0.163061	0.0227526	0.0595829
b3187	ispB	chr	+	3331731,	3332703,	-11.7995	-11.9291	-11.5477	-11.9914	-12.0083	-12.1198	-11.7195	-11.8	-11.892	-11.7354	-12.023	-11.7723	0.116193	0.174959	0.0228078	0.0596277
b0852	rimK	chr	+	891189,	892092,	-12.1918	-12.2469	-12.1364	-12.4708	-12.2701	-12.5297	-12.0766	-12.1103	-11.966	-12.1883	-12.3892	-12.0716	0.0825597	0.136093	0.0235481	0.0614606
b1865	nudB	chr	-	1946203,	1946656,	-12.3539	-12.2821	-12.0972	-12.7615	-12.4129	-12.7763	-12.1687	-12.0874	-11.966	-12.2236	-12.5995	-12.1081	0.0547126	0.101157	0.0236282	0.0615496
b1215	kdsA	chr	+	1267387,	1268242,	-11.6069	-11.7358	-11.7675	-12.0931	-11.8991	-12.1512	-11.6275	-11.2119	-11.155	-11.7135	-12.0146	-11.3935	0.0254304	0.0588243	0.023725	0.0616142
b3787	rffD	chr	+	3969282,	3970545,	-12.7456	-12.4974	-12.8583	-12.9249	-13.1893	-12.9865	-12.6697	-12.7011	-12.4066	-12.6952	-13.0485	-12.6386	0.0715997	0.122274	0.0238971	0.0618559
b0463	acrA	chr	-	483649,	484843,	-11.8343	-11.7855	-12.1083	-12.2742	-12.1196	-12.3014	-11.6882	-11.5923	-11.9409	-11.9179	-12.2088	-11.6869	0.0643022	0.113398	0.024006	0.0620354
b1805	fadD	chr	-	1886084,	1887770,	-12.9746	-12.9746	-13.2425	-12.265	-12.161	-12.6589	-12.9085	-13.0988	-13.477	-13.0744	-12.2843	-13.0477	0.0244359	0.0574328	0.0242809	0.0626422
b4213	cpdB	chr	-	4432644,	4434588,	-13.5365	-13.531	-13.5705	-12.9249	-12.9168	-12.4301	-13.8799	-13.6838	-13.2753	-13.5479	-12.8115	-13.7055	0.0397499	0.0804241	0.0243271	0.0626583
b0116	lpd	chr	+	127911,	129336,	-9.38319	-9.40118	-9.39293	-9.19594	-9.30351	-9.15115	-9.38244	-9.49491	-9.39801	-9.39326	-9.23341	-9.4239	0.0585926	0.105954	0.0243876	0.062711
b0773	ybhB	chr	-	806655,	807132,	-13.4914	-13.9861	-13.3307	-13.7359	-13.1471	-13.5297	-14.267	-14.3757	-14.477	-13.5719	-13.4111	-14.3346	0.64171	0.693525	0.0244627	0.0628011
b4172	hfq	chr	+	4398310,	4398619,	-10.273	-10.346	-10.2609	-10.1851	-10.0369	-10.1082	-10.2856	-10.2623	-10.381	-10.2931	-10.1032	-10.2908	0.0298684	0.0657861	0.0247153	0.0633457
b1069	yceN	chr	+	1127061,	1128597,	-11.8699	-12.2192	-12.1593	-12.3691	-12.739	-12.5092	-11.9825	-12.2057	-11.966	-12.0982	-12.5501	-12.0557	0.040254	0.0811297	0.0252266	0.0642355
b3866	yihI	chr	+	4049369,	4049879,	-13.7858	-13.2965	-13.9753	-14.2834	-14.2037	-14.5715	-13.7195	-13.5215	-13.044	-13.6594	-14.2979	-13.53	0.0603544	0.108559	0.0253392	0.064379
b2370	evgS	chr	+	2482395,	2485989,	-13.0875	-13.6005	-13.4386	-12.8139	-12.9168	-12.801	-14.745	-14.2688	-13.892	-13.3899	-12.8559	-14.4137	0.0651384	0.114229	0.0253652	0.064379
b0910	cmk	chr	+	960423,	961107,	-11.5251	-11.2023	-11.2092	-11.8893	-11.9833	-11.9041	-11.6275	-11.4395	-11.3232	-11.2819	-11.933	-11.5109	0.022437	0.0543066	0.0255848	0.0648313
b2114	metG	chr	+	2192321,	2194355,	-11.2994	-11.5267	-11.0972	-11.8477	-11.6283	-11.6366	-11.2036	-11.4762	-11.2139	-11.2868	-11.7061	-11.2967	0.0648253	0.113815	0.0256576	0.0649109
b1982	amn	chr	+	2053084,	2054539,	-15.1214	-14.7704	-14.1709	-13.379	-13.739	-12.931	-14.5524	-14.5525	-14.0984	-14.5719	-13.4185	-14.476	0.022141	0.053673	0.0257496	0.0650384
b0820	ybiT	chr	+	855185,	856778,	-11.9592	-12.1202	-12.4885	-12.8139	-12.6776	-12.489	-12.2395	-12.1454	-11.7989	-12.207	-12.6859	-12.133	0.0750266	0.126939	0.0260792	0.0654616
b1564	relB	chr	-	1643656,	1643896,	-14.2284	-14.548	-14.0807	-14.9249	-14.8933	-14.7521	-14.3429	-14.3757	-14.629	-14.2671	-14.876	-14.3935	0.0398968	0.0806173	0.0263203	0.0658429
b1132	hflD	chr	-	1191212,	1191854,	-13.1044	-12.9291	-12.5178	-14.0452	-13.5077	-13.4495	-12.6944	-12.7186	-12.551	-12.7908	-13.6682	-12.6808	0.0340214	0.0727075	0.0263725	0.0658682
b3887	dtd	chr	+	4075037,	4075475,	-14.8699	-14.2679	-14.1944	-13.4395	-13.5077	-13.337	-14.1261	-14.3757	-13.892	-14.3687	-13.4484	-14.1711	0.0358776	0.0751126	0.0265466	0.0661059
b3097	yqjC	chr	+	3246990,	3247359,	-14.0875	-13.7704	-14.2671	-13.6619	-13.2929	-13.074	-14.3044	-14.0317	-14.0984	-14.0321	-13.3676	-14.1711	0.0372435	0.0764396	0.0265943	0.0661059
b3822	recQ	chr	+	4003886,	4005716,	-12.5138	-12.3629	-12.2062	-12.7486	-12.5166	-12.7763	-12.3725	-12.3757	-12.155	-12.3349	-12.6464	-12.3394	0.0579849	0.105342	0.0267029	0.0662707
b4396	rob	chr	-	4632463,	4633333,	-11.5251	-11.4768	-11.5215	-11.3839	-11.5529	-11.5504	-11.682	-11.8569	-11.7328	-11.5067	-11.4886	-11.7497	0.852528	0.874302	0.026859	0.0665526
b3956	ppc	chr	-	4148469,	4151121,	-11.7129	-12.2469	-11.8213	-11.4867	-11.4424	-11.4301	-12.1948	-12.0988	-11.8447	-11.9237	-11.4559	-12.104	0.0990859	0.154859	0.0269931	0.0665687
b0643	ybeL	chr	+	674240,	674723,	-14.7589	-15.2965	-15.7328	-13.3989	-13.5621	-13.411	-14.8519	-15.3757	-14.477	-15.2769	-13.4712	-14.9487	0.020527	0.0507825	0.0271277	0.0665862
b3803	hemX	chr	-	3985907,	3987089,	-12.4157	-12.4325	-12.1195	-11.9914	-12.2037	-11.9724	-12.4334	-12.4911	-12.4413	-12.2968	-12.0774	-12.4549	0.107776	0.164983	0.0271248	0.0665862
b0675	nagD	chr	-	698796,	699549,	-12.7456	-13.133	-12.6332	-12.6499	-12.8475	-12.7521	-13.1948	-13.1454	-12.9409	-12.8193	-12.7543	-13.1372	0.632327	0.684329	0.0270546	0.0665862
b0783	moaC	chr	+	817792,	818278,	-13.6311	-13.6184	-13.3177	-14.4395	-14.4212	-13.801	-13.3235	-13.2688	-13.044	-13.4952	-14.2843	-13.2597	0.0606569	0.108559	0.0273585	0.0668511
b4175	hflC	chr	+	4401322,	4402327,	-10.8413	-10.5983	-10.6114	-10.414	-10.4233	-10.5245	-10.8485	-10.7363	-10.629	-10.6626	-10.439	-10.7739	0.0832864	0.136706	0.0273637	0.0668511
b3735	atpH	chr	-	3917892,	3918426,	-9.74889	-9.8266	-9.77637	-9.90703	-9.85882	-9.82606	-9.67278	-9.71856	-9.56048	-9.78637	-9.86971	-9.67167	0.0708566	0.121652	0.0278707	0.0677004
b2147	yeiA	chr	+	2233286,	2234522,	-15.2658	-13.4646	-14.9156	-13.8964	-13.9895	-14.0151	-15.16	-14.7542	-15.477	-14.2868	-13.9597	-15.0399	0.402089	0.470255	0.0278843	0.0677004
b4125	dcuS	chr	-	4348053,	4349685,	-12.9138	-12.3781	-13.3177	-12.0219	-12.255	-12.5297	-13.16	-12.8282	-13.551	-12.8301	-12.212	-13.0796	0.144981	0.207912	0.0280671	0.0680266
b1840	yebZ	chr	-	1921742,	1922615,	-13.0708	-13.2538	-13.3177	-12.9106	-12.7922	-12.9041	-13.4649	-13.1454	-13.4066	-13.2283	-12.8559	-13.3346	0.0255003	0.058899	0.0283217	0.068444
b4401	arcA	chr	-	4637612,	4638329,	-10.21	-10.2399	-10.5629	-10.079	-10.0225	-10.0967	-10.314	-10.2306	-10.1768	-10.3504	-10.0571	-10.2631	0.133276	0.194693	0.0291907	0.0703271
b1990	erfK	chr	-	2060414,	2061347,	-14.2284	-14.5141	-14.8032	-14.077	-13.8251	-14.0151	-15.3044	-14.8282	-14.629	-14.536	-13.949	-15.0089	0.0641318	0.113353	0.0296143	0.0709112
b3849	trkH	chr	+	4031167,	4032619,	-12.6558	-12.7019	-12.8583	-12.9689	-12.9286	-13.1995	-12.745	-12.5843	-12.3726	-12.7491	-12.9924	-12.6268	0.0533584	0.0991213	0.0298605	0.0713917
b2687	luxS	chr	-	2812239,	2812755,	-11.6434	-11.7855	-11.5141	-11.8893	-11.6091	-11.6703	-11.4334	-11.4108	-11.229	-11.637	-11.7175	-11.3935	0.551142	0.611686	0.0299191	0.0714227
b0113	pdhR	chr	+	122091,	122856,	-11.7064	-11.7115	-11.8032	-13.9249	-13.0273	-13.7048	-12.0766	-12.01	-12.044	-11.7456	-13.4259	-12.0477	0.0203375	0.0503931	0.0300465	0.0714283
b1033	ghrA	chr	+	1097108,	1098047,	-14.7064	-14.6184	-14.4247	-14.1425	-13.7182	-14.1995	-14.6944	-14.9886	-14.477	-14.5598	-13.949	-14.7561	0.0451999	0.0888119	0.0300116	0.0714283
b4346	mcrB	chr	-	4575980,	4577360,	-13.7589	-13.918	-13.9552	-13.8684	-13.6776	-13.7048	-14.4649	-14.4323	-14.9915	-13.8893	-13.7497	-14.5191	0.207849	0.273063	0.0300583	0.0714283
b3736	atpF	chr	-	3918440,	3918911,	-9.10331	-9.25209	-9.2152	-9.28572	-9.20095	-9.23268	-9.11253	-9.11901	-9.00123	-9.1979	-9.23748	-9.09788	0.401101	0.46945	0.030442	0.0720033
b1179	ycgL	chr	+	1226903,	1227230,	-13.4477	-13.1075	-13.3972	-13.3989	-13.3718	-12.9585	-13.9085	-13.7907	-13.9915	-13.3018	-13.2911	-13.8769	0.698537	0.743214	0.0304842	0.0720033
b0345	lacI	chr	-	365651,	366734,	-15.3438	-14.5141	-14.9156	-13.8139	-13.6381	-14.2666	-14.6944	-14.9062	-14.629	-14.852	-13.8066	-14.7561	0.0311666	0.0679761	0.0309196	0.0728931
b1757	ynjE	chr	+	1837490,	1838798,	-14.9288	-15.0335	-15.0807	-15.7615	-14.9406	-14.7521	-14.16	-13.5525	-13.7989	-15.0238	-15.1431	-13.863	0.702775	0.745392	0.031482	0.0736932
b0166	dapD	chr	-	185122,	185947,	-11.0421	-11.2609	-11.1223	-10.9504	-11.0305	-10.9865	-11.4702	-11.2119	-11.3726	-11.1471	-10.9924	-11.3589	0.127397	0.187857	0.0315484	0.0737385
b1718	infC	chr	-	1798119,	1798662,	-7.55485	-7.60663	-7.6365	-7.48002	-7.44983	-7.5413	-7.67508	-7.58176	-7.59799	-7.60468	-7.47817	-7.62976	0.0395256	0.0801776	0.031715	0.0740173
b3599	mtlA	chr	+	3770303,	3772217,	-12.7456	-12.9069	-12.2062	-11.9035	-11.8196	-11.6366	-12.5982	-12.1454	-12.629	-12.5538	-11.8115	-12.4239	0.0455017	0.0890697	0.0321504	0.074922
b1831	proQ	chr	-	1912859,	1913558,	-10.5801	-10.753	-10.7371	-11.0452	-10.8817	-11.1432	-10.6975	-10.6625	-10.619	-10.7002	-10.9882	-10.6732	0.0279903	0.0630175	0.0326447	0.0757357
b3620	rfaF	chr	+	3792951,	3793998,	-12.3043	-11.8959	-11.9303	-12.2559	-12.5529	-12.4301	-11.8729	-12.1219	-11.6904	-12.0053	-12.4148	-11.9268	0.0878735	0.142012	0.0325522	0.0757357
b0222	lpcA	chr	+	243542,	244121,	-12.2946	-12.2538	-12.2303	-12.1765	-12.0596	-11.8516	-12.3925	-12.4762	-12.5135	-12.2548	-12.0571	-12.4393	0.131344	0.192408	0.0326361	0.0757357
b3412	bioH	chr	-	3542095,	3542866,	-14.8133	-14.159	-14.1944	-14.8684	-14.5996	-14.6589	-14.267	-14.4911	-14.3395	-14.317	-14.7039	-14.354	0.26808	0.337471	0.0327446	0.0758551
b2982	insH	chr	+	3128199,	3129216,	-11.233	-11.1989	-11.2303	-10.9952	-10.8645	-10.8072	-11.097	-11.1813	-11.0984	-11.22	-10.8991	-11.1267	0.0234636	0.0558711	0.0329844	0.0762976
b1103	hinT	chr	+	1161107,	1161467,	-13.247	-13.2124	-13.4386	-13.2113	-12.9527	-13.074	-13.3044	-13.6167	-13.629	-13.3069	-13.0658	-13.4549	0.0988372	0.154624	0.033124	0.076395
b0104	guaC	chr	+	113443,	114487,	-12.7456	-12.8635	-12.3904	-13.0452	-13.2929	-12.8776	-12.4971	-12.6332	-12.0984	-12.6307	-13.1129	-12.476	0.0971755	0.152635	0.0334341	0.0769967
b2943	galP	chr	+	3086305,	3087700,	-13.4694	-12.6736	-13.0376	-12.5354	-12.6283	-12.1832	-13.9085	-15.4911	-15.477	-12.991	-12.4983	-14.4974	0.0994893	0.155334	0.0342614	0.0782118
b3627	rfaI	chr	-	3800061,	3801081,	-13.6311	-13.0455	-13.5552	-13.6862	-13.1751	-13.074	-13.9085	-14.8282	-14.477	-13.374	-13.3184	-14.2597	0.727031	0.766489	0.0341017	0.0782118
b1529	marC	chr	-	1616266,	1616932,	-14.8133	-15.3554	-14.2671	-15.0452	-14.5621	-15.074	-14.4649	-14.0761	-14.0984	-14.7118	-14.8163	-14.2597	0.832492	0.854874	0.0342557	0.0782118
b3228	sspB	chr	-	3374300,	3374798,	-11.0917	-10.9573	-11.2954	-11.4293	-11.6776	-11.337	-11.0055	-10.9781	-10.9409	-11.118	-11.514	-10.986	0.0606535	0.108559	0.0343723	0.0783508
b3363	ppiA	chr	-	3489746,	3490319,	-12.6809	-13.0577	-13.0271	-13.5027	-13.49	-13.2327	-12.9674	-12.9886	-12.9409	-12.9393	-13.4408	-12.971	0.0355799	0.0747893	0.0345614	0.0785531
b3251	mreB	chr	-	3398065,	3399109,	-10.9669	-10.9347	-11.014	-11.1722	-11.3397	-11.074	-10.9085	-10.9162	-10.6491	-10.9739	-11.2233	-10.87	0.0920955	0.146567	0.0347588	0.0788874
b0198	metI	chr	-	220967,	221621,	-14.3845	-15.4168	-14.8397	-15.3989	-14.7182	-14.8516	-14.3824	-14.1692	-13.892	-14.8668	-14.9597	-14.2236	0.780783	0.810966	0.0348568	0.0789954
b0634	mrdB	chr	-	664423,	665536,	-12.1918	-11.9688	-11.8772	-12.5135	-12.6577	-13.074	-11.9978	-12.2948	-11.9162	-11.9849	-12.6726	-12.0837	0.0291663	0.0648784	0.034912	0.0790062
b4152	frdC	chr	-	4377399,	4377795,	-14.7064	-14.0096	-14.0376	-12.8964	-12.9527	-12.8261	-14.5982	-14.3212	-13.7114	-14.1721	-12.9068	-14.3346	0.0245056	0.0574328	0.0350885	0.079291
b1237	hns	chr	-	1291731,	1292145,	-9.97848	-9.95024	-9.90109	-9.85456	-9.79902	-9.93785	-10.1904	-10.2119	-10.5043	-9.93779	-9.84526	-10.2404	0.180052	0.245536	0.0354073	0.0796665
b1839	yebY	chr	-	1921388,	1921730,	-14.2284	-14.2399	-14.4247	-13.9249	-13.5256	-13.7521	-14.16	-14.3212	-14.2139	-14.3069	-13.7039	-14.2236	0.0219506	0.0533769	0.0354674	0.0796682
b4259	holC	chr	-	4481859,	4482303,	-13.5138	-14.0096	-13.6015	-12.9394	-13.2476	-13.2666	-13.6697	-13.6498	-13.551	-13.7052	-13.131	-13.6446	0.0464726	0.0900912	0.0355099	0.0796682
b0797	rhlE	chr	+	830094,	831459,	-13.364	-13.6924	-13.2303	-15.1094	-14.9406	-16.337	-13.6944	-14.2181	-13.2139	-13.4115	-15.1929	-13.769	0.0342781	0.0727666	0.0362466	0.0808577
b3400	hslR	chr	+	3527369,	3527771,	-14.0875	-14.3554	-14.6657	-14.077	-13.6776	-13.9041	-15.4649	-15.4911	-16.7989	-14.3899	-13.8559	-15.6093	0.084114	0.137068	0.0366592	0.0814303
b4571	wbbL	chr	-	2099419,	2101413,	-12.7064	-12.9069	-12.8772	-12.9838	-12.8251	-12.5297	-13.508	-13.2948	-13.9915	-12.841	-12.8163	-13.4866	0.754525	0.791417	0.0366298	0.0814303
b3067	rpoD	chr	+	3211068,	3212910,	-10.8591	-10.778	-10.7457	-11.4089	-11.4466	-10.9865	-10.5924	-10.6208	-10.8682	-10.7855	-11.3323	-10.6401	0.0742317	0.125945	0.036882	0.0816935
b0946	ycbW	chr	+	1005174,	1005717,	-12.8699	-12.7115	-13.0807	-12.5801	-12.3006	-12.3922	-12.7579	-13.2688	-13.2139	-12.8893	-12.4148	-12.986	0.0292722	0.0650217	0.0371019	0.0820644
b1130	phoP	chr	-	1188998,	1189670,	-12.5712	-13.1459	-12.9652	-13.2834	-13.1196	-13.074	-12.9524	-12.7542	-12.9409	-12.9083	-13.1678	-12.8769	0.255006	0.324667	0.0377163	0.0831884
b2266	elaB	chr	-	2378743,	2379049,	-14.1214	-14.1855	-14.2182	-13.9249	-13.2476	-13.2666	-14.3044	-14.6838	-14.0984	-14.1813	-13.4635	-14.3935	0.0867727	0.140378	0.038008	0.0837138
b1087	yceF	chr	-	1145233,	1145818,	-14.6069	-14.6549	-14.2671	-14.1425	-14.5996	-14.5715	-14.8519	-14.9886	-15.2139	-14.478	-14.4111	-14.9487	0.727822	0.766489	0.0381302	0.083865
b4558	yifL	chr	+	3992544,	3992748,	-14.0219	-13.6736	-13.9958	-13.5027	-13.3397	-13.2666	-14.3824	-14.6167	-13.892	-13.8818	-13.3819	-14.3736	0.022827	0.0548269	0.0384978	0.0843183
b0197	metQ	chr	-	220112,	220928,	-12.9439	-12.6924	-12.7414	-12.6862	-12.5529	-12.5297	-13.0929	-12.8667	-13.2753	-12.7732	-12.5953	-13.0321	0.102122	0.15834	0.0388057	0.0846375
b2261	menC	chr	-	2373021,	2373984,	-13.0219	-12.6366	-12.7764	-13.3209	-13.0926	-13.3014	-12.6335	-12.7011	-12.1265	-12.7837	-13.212	-12.5691	0.0416492	0.0834049	0.0390445	0.0850398
b0094	ftsA	chr	+	103981,	105244,	-10.9064	-10.7906	-10.7808	-10.641	-10.7495	-10.6091	-10.8694	-10.8715	-10.7655	-10.8157	-10.6815	-10.8544	0.0530908	0.0989764	0.0391552	0.0851626
b4222	ytfP	chr	+	4445916,	4446258,	-12.1129	-12.1459	-12.1478	-11.8893	-11.7707	-11.9865	-12.267	-12.4911	-12.1265	-12.1381	-11.8534	-12.3203	0.0515389	0.0970233	0.0393791	0.0855307
b2935	tktA	chr	-	3077665,	3079657,	-9.63571	-9.65032	-9.72208	-9.82229	-10.0083	-9.98299	-9.78915	-9.7076	-9.60906	-9.67435	-9.93303	-9.73214	0.0282542	0.0633899	0.0397987	0.086203
b1333	uspE	chr	-	1395695,	1396646,	-12.7324	-12.8635	-12.5252	-12.3496	-12.0402	-12.5715	-13.0288	-12.7011	-13.2753	-12.6887	-12.2412	-12.9341	0.114149	0.172546	0.0400416	0.086252
b0578	nfsB	chr	-	603993,	604647,	-12.8413	-12.7704	-12.6905	-12.8684	-12.5529	-12.5504	-13.1094	-12.9264	-13.155	-12.7559	-12.6595	-13.0477	0.413931	0.481587	0.039884	0.086252
b1874	cutC	chr	-	1956543,	1957290,	-13.4052	-13.2124	-13.8583	-12.3989	-12.5166	-12.5092	-13.1948	-13.4323	-12.892	-13.4895	-12.4712	-13.2236	0.029658	0.0655972	0.0401467	0.0863595
b0019	nhaA	chr	+	17488,	18655,	-11.9515	-12.0516	-11.8032	-11.8546	-11.8532	-11.8645	-12.143	-11.9886	-12.0984	-11.9237	-11.8559	-12.0796	0.392707	0.461696	0.0403302	0.0864097
b0912	ihfB	chr	+	963050,	963335,	-12.364	-11.946	-11.8536	-12.1594	-11.9588	-11.9447	-12.3625	-12.1935	-12.307	-12.0032	-12.0258	-12.292	0.858421	0.879193	0.0403919	0.0864097
b3704	rnpA	chr	+	3882515,	3882875,	-11.6746	-11.4365	-11.4885	-12.2201	-12.3881	-12.8516	-11.5751	-11.6167	-11.7114	-11.5154	-12.4001	-11.6093	0.0252583	0.058633	0.0406006	0.0865041
b4220	ytfM	chr	+	4440404,	4442138,	-13.364	-13.2124	-13.3049	-12.7486	-13.002	-12.5715	-13.3044	-13.1454	-13.3395	-13.2868	-12.8163	-13.2506	0.0409988	0.0823129	0.0414296	0.087818
b1100	ycfH	chr	+	1155999,	1156797,	-14.8133	-14.2399	-14.5705	-15.2469	-14.9406	-14.8516	-14.745	-14.4323	-14.3395	-14.5009	-15.0258	-14.5634	0.0892452	0.143636	0.0415658	0.087818
b2834	tas	chr	+	2969618,	2970659,	-13.7324	-13.3256	-13.9156	-13.4191	-13.1333	-12.8261	-13.8799	-13.6167	-14.3395	-13.6402	-13.1616	-13.8355	0.0951792	0.1498	0.0416098	0.087818
b3396	mrcA	chr	+	3520892,	3523445,	-11.4263	-11.7212	-11.9254	-11.794	-12.0661	-12.2666	-11.5134	-11.7011	-11.3232	-11.7118	-11.9951	-11.5466	0.153061	0.216572	0.0415007	0.087818
b1852	zwf	chr	-	1932862,	1934338,	-11.8064	-12.3256	-12.3635	-12.0452	-12.0727	-12.1354	-12.1515	-12.1935	-12.2443	-12.186	-12.0745	-12.1797	0.698602	0.743214	0.0415891	0.087818
b0925	ycbB	chr	+	980269,	982117,	-13.6809	-13.918	-13.8772	-13.2469	-13.6187	-13.3014	-13.8244	-13.9468	-13.7989	-13.8374	-13.4111	-13.863	0.0424225	0.0840799	0.041925	0.0880403
b0863	artI	chr	-	901479,	902211,	-12.9288	-13.1722	-12.9353	-12.8139	-13.0531	-12.7763	-13.4438	-13.0988	-13.477	-13.0114	-12.9068	-13.3155	0.329605	0.397353	0.04194	0.0880403
b0143	pcnB	chr	-	157728,	159126,	-11.364	-11.2965	-11.4598	-12.0142	-11.9527	-11.6146	-11.2903	-11.3826	-11.2911	-11.3766	-11.9017	-11.3227	0.0453584	0.0889689	0.0424208	0.0885988
b0131	panD	chr	-	146313,	146694,	-12.4263	-12.1459	-12.6657	-12.0931	-12.3318	-12.1671	-12.4438	-12.4911	-12.7545	-12.406	-12.2088	-12.5028	0.289744	0.357573	0.0424324	0.0885988
b4162	orn	chr	+	4389626,	4390172,	-12.7995	-12.8008	-12.9353	-13.0452	-12.8933	-12.7763	-12.7069	-12.6167	-12.477	-12.852	-12.9225	-12.6386	0.55113	0.611686	0.0423421	0.0885988
b0084	ftsI	chr	+	91412,	93179,	-7.82464	-7.79696	-7.87865	-7.77805	-7.75905	-7.74681	-7.84716	-7.85937	-7.93935	-7.8359	-7.76355	-7.86474	0.0805862	0.133684	0.0426162	0.0888571
b3151	yraQ	chr	-	3295119,	3296160,	-14.2284	-14.0577	-14.3702	-14.077	-14.6776	-14.411	-13.9674	-13.6838	-13.551	-14.2188	-14.3819	-13.7953	0.449637	0.515791	0.0426696	0.0888571
b1330	ynaI	chr	-	1392914,	1393946,	-13.1044	-13.311	-13.7157	-13.8684	-14.0146	-14.1354	-13.1773	-13.6838	-13.477	-13.3953	-13.9814	-13.3835	0.0558873	0.102843	0.0427836	0.0889762
b3368	cysG	chr	+	3495849,	3497223,	-13.2658	-12.8743	-13.4108	-13.2469	-13.2037	-13.411	-12.682	-13.0317	-12.5894	-13.1675	-13.2576	-12.7821	0.595993	0.650854	0.04327	0.0897494
b2182	bcr	chr	-	2276591,	2277782,	-12.7723	-12.9291	-13.1593	-13.2834	-13.1196	-13.5297	-12.745	-12.8093	-12.8447	-12.9709	-13.251	-12.7821	0.0948452	0.149424	0.0435241	0.0899192
b1221	narL	chr	-	1274401,	1275052,	-14.6069	-13.9403	-14.4812	-15.2469	-14.5256	-15.6589	-13.5751	-13.6498	-13.629	-14.2968	-14.9383	-13.6093	0.122671	0.182781	0.0434691	0.0899192
b0397	sbcC	chr	-	411830,	414977,	-13.583	-13.0335	-13.4386	-13.8409	-13.5807	-13.7048	-13.1948	-13.3212	-12.7989	-13.317	-13.6949	-13.1711	0.149322	0.21258	0.0434878	0.0899192
b2797	sdaB	chr	+	2927597,	2928965,	-9.57418	-9.60384	-9.61433	-9.80062	-9.78007	-9.91748	-9.59381	-9.60038	-9.34356	-9.60023	-9.81329	-9.55642	0.0245646	0.0574328	0.0439594	0.0905796
b2369	evgA	chr	+	2481776,	2482391,	-12.8991	-12.9517	-13.3177	-12.8546	-13.1196	-13.1354	-13.53	-13.4614	-13.9915	-13.0701	-13.0202	-13.5634	0.90899	0.923138	0.0439234	0.0905796
b2497	uraA	chr	-	2616892,	2618182,	-12.8133	-12.7805	-12.8122	-13.3989	-13.9168	-14.489	-12.7195	-12.4468	-12.7114	-12.8014	-13.7874	-12.6151	0.0691288	0.119447	0.0444363	0.0914419
b0632	dacA	chr	-	661974,	663186,	-11.3793	-11.311	-11.3635	-12.2113	-11.8588	-12.2666	-11.8313	-11.4037	-11.551	-11.3491	-12.0542	-11.6239	0.0245722	0.0574328	0.0446667	0.091555
b3244	tldD	chr	-	3388604,	3390050,	-12.1828	-12.1075	-11.7328	-11.4344	-11.4768	-11.5092	-11.6697	-11.9572	-11.8682	-11.9649	-11.4674	-11.7953	0.0584792	0.105901	0.0445978	0.091555
b2551	glyA	chr	-	2682275,	2683529,	-10.3463	-10.4974	-10.3339	-10.2605	-10.2968	-10.337	-10.4676	-10.4002	-10.3643	-10.3919	-10.2911	-10.4277	0.206509	0.271988	0.0446162	0.091555
b0268	yagE	chr	+	281480,	282410,	-13.6069	-13.1459	-13.7328	-12.9106	-12.739	-12.7521	-14.2304	-13.7907	-13.4066	-13.4724	-12.8018	-13.9196	0.0496518	0.0943626	0.0452239	0.0923345
b2521	sseA	chr	+	2650515,	2651361,	-13.1918	-13.6736	-13.4957	-13.0452	-12.905	-13.1354	-13.3044	-13.4911	-13.2139	-13.4667	-12.9979	-13.354	0.0757825	0.127883	0.0454293	0.0925127
b2318	truA	chr	-	2432845,	2433658,	-12.5251	-12.9517	-12.6332	-12.7486	-12.9771	-12.801	-12.4334	-12.1219	-12.551	-12.7052	-12.8559	-12.3298	0.408572	0.476768	0.0456818	0.0927856
b2167	fruA	chr	-	2257740,	2259432,	-13.6558	-13.5828	-13.4386	-13.8139	-13.7814	-13.5715	-13.2304	-13.2948	-13.551	-13.5419	-13.7497	-13.2967	0.177422	0.243294	0.0459139	0.0931362
b0952	ymbA	chr	+	1014118,	1014682,	-14.0875	-13.6924	-13.3702	-14.6146	-14.49	-14.074	-13.3429	-13.2181	-13.9915	-13.6402	-14.4408	-13.3736	0.0659484	0.115263	0.0461722	0.093539
b2890	lysS	chr	-	3031678,	3033196,	-10.4831	-10.3442	-10.5477	-11.0571	-10.7814	-11.2496	-10.2832	-10.4179	-10.7436	-10.4576	-10.961	-10.391	0.0361133	0.07526	0.046743	0.0944509
b3770	ilvE	chr	+	3950506,	3951436,	-15.4263	-14.5141	-14.5401	-14.8139	-14.5996	-14.6589	-15.2304	-14.9062	-14.9915	-14.7118	-14.6859	-15.0716	0.697427	0.742973	0.0468681	0.0945819
b4124	dcuR	chr	-	4347337,	4348057,	-15.3438	-14.9861	-14.1944	-14.0142	-14.2929	-14.411	-14.6455	-14.5525	-14.7989	-14.6854	-14.2056	-14.6327	0.211517	0.277185	0.0470334	0.0946713
b4328	iadA	chr	-	4556376,	4557549,	-13.5138	-14.3554	-13.6015	-14.4813	-14.4212	-14.1354	-13.9674	-14.0317	-13.629	-13.7943	-14.3819	-13.9341	0.18002	0.245536	0.0472341	0.0948315
b1274	topA	chr	+	1329071,	1331669,	-11.165	-11.0577	-11.0889	-10.8928	-11.0993	-11.2327	-11.5134	-11.5139	-11.5135	-11.0971	-11.0442	-11.5136	0.802686	0.829707	0.0472193	0.0948315
b2572	rseA	chr	-	2706775,	2707426,	-13.2849	-12.6366	-12.6015	-12.0066	-12.0661	-12.1671	-12.2577	-12.5215	-12.5894	-12.7628	-12.0629	-12.3935	0.0699233	0.12033	0.0474178	0.0950785
b3724	phoU	chr	-	3904875,	3905601,	-12.5025	-12.3705	-12.5629	-12.5915	-12.7922	-12.801	-12.3725	-12.4614	-12.071	-12.478	-12.7175	-12.354	0.0503191	0.0952839	0.0477892	0.0956376
b3652	recG	chr	+	3823232,	3825314,	-12.2191	-11.9631	-11.6698	-12.3889	-12.5996	-12.337	-12.0766	-12.2306	-11.8682	-11.8969	-12.4674	-12.0958	0.0711088	0.121701	0.0478188	0.0956376
b3639	dfp	chr	+	3810753,	3811974,	-12.6189	-12.8423	-12.5629	-13.2834	-12.9895	-12.9585	-12.8109	-12.6667	-12.629	-12.6691	-13.0833	-12.7306	0.041822	0.0836373	0.0482482	0.0963168
b2571	rseB	chr	-	2705819,	2706776,	-12.8844	-12.5395	-12.8583	-12.6381	-12.2929	-12.2839	-12.7069	-12.8863	-12.892	-12.7456	-12.4074	-12.7953	0.0916796	0.146202	0.0482814	0.0963168
b1234	rssA	chr	+	1288428,	1289373,	-14.3438	-14.6924	-15.1709	-14.3209	-14.6381	-14.7521	-15.4649	-14.9886	-15.7989	-14.7525	-14.5339	-15.3155	0.585523	0.641658	0.0485792	0.0966707
b0033	carB	chr	+	30816,	34038,	-13.3438	-13.159	-13.1139	-14.077	-13.5621	-13.6146	-13.16	-13.0537	-13.044	-13.186	-13.7404	-13.104	0.0624164	0.110947	0.049343	0.0979544
b3726	pstA	chr	-	3906571,	3907462,	-14.5138	-13.9861	-13.5552	-14.4813	-14.1471	-14.6589	-14.0929	-13.8282	-13.551	-13.9045	-14.3534	-13.9052	0.28139	0.350841	0.0493525	0.0979544
b1246	oppD	chr	+	1302777,	1303791,	-10.9746	-11.0155	-11.0536	-11.4241	-11.4552	-11.7282	-11.2349	-11.2559	-11.0846	-11.0197	-11.4925	-11.2192	0.0273506	0.0620739	0.0498407	0.0985486
b1067	yceH	chr	+	1125379,	1126027,	-15.1918	-14.9861	-15.8032	-14.077	-14.0926	-14.074	-14.6455	-14.3212	-14.629	-15.317	-14.0833	-14.5191	0.0365986	0.0759119	0.0502183	0.0991702
b3747	kup	chr	+	3929338,	3931207,	-12.8555	-12.7906	-12.7675	-13.379	-13.161	-13.1354	-12.8109	-13.0761	-12.8447	-12.7978	-13.2314	-12.9052	0.0227348	0.0546891	0.050781	0.10014
b3802	hemY	chr	-	3984708,	3985905,	-11.8771	-11.992	-11.9353	-11.6322	-11.8251	-11.9175	-12.0685	-12.1692	-12.071	-11.9393	-11.7684	-12.104	0.224487	0.29174	0.0508374	0.10014
b3001	yghZ	chr	+	3145918,	3146959,	-13.5365	-14.3256	-14.4247	-12.8546	-12.6478	-12.9865	-13.9978	-13.6498	-14.7989	-14.1092	-12.7826	-13.9487	0.0344192	0.0728386	0.0511031	0.100537
b3259	prmA	chr	+	3407091,	3407973,	-13.9592	-13.7309	-13.2922	-14.1094	-13.9895	-14.7521	-13.267	-13.3757	-13.2753	-13.5902	-14.1554	-13.3061	0.11496	0.173437	0.0511721	0.100546
b3492	yhiN	chr	-	3634230,	3635433,	-13.5365	-12.9069	-13.2922	-14.1765	-13.9895	-14.337	-13.771	-12.9886	-13.2139	-13.1999	-14.1189	-13.3638	0.0201153	0.0501602	0.0516126	0.101285
b2559	tadA	chr	-	2695375,	2695879,	-12.7723	-13.2538	-12.5178	-13.7615	-13.7182	-14.337	-13.0288	-13.0537	-11.966	-12.805	-13.836	-12.822	0.0208414	0.0514788	0.0519515	0.101695
b3033	yqiB	chr	-	3174879,	3175302,	-13.9592	-13.9861	-13.9353	-12.6499	-13.2182	-12.9041	-13.771	-14.1692	-13.3395	-13.9589	-12.9278	-13.822	0.0234953	0.0558711	0.0522326	0.102118
b2686	emrB	chr	+	2810637,	2812176,	-12.583	-13.159	-13.3836	-13.7874	-13.5807	-13.3014	-12.9978	-13.1935	-12.5894	-13.0616	-13.5912	-12.9936	0.153092	0.216572	0.0530659	0.10336
b2795	ygdH	chr	+	2924329,	2925694,	-13.006	-13.2821	-13.6657	-12.5027	-12.6676	-12.337	-13.5524	-13.7907	-12.9409	-13.3375	-12.538	-13.5191	0.0328718	0.0708077	0.0531362	0.103368
b3655	yicH	chr	+	3828479,	3830189,	-12.6311	-13.07	-13.0917	-12.3691	-12.3799	-12.2496	-13.143	-12.9264	-12.629	-12.951	-12.3498	-12.9785	0.0488328	0.0932588	0.0536979	0.10414
b3495	uspA	chr	+	3638133,	3638568,	-12.1918	-12.5057	-12.7852	-11.7679	-11.9109	-11.9724	-12.1177	-12.5063	-12.5894	-12.5154	-11.8684	-12.3108	0.0574802	0.104789	0.0537326	0.10414
b3669	uhpA	chr	-	3848158,	3848749,	-12.6936	-12.4565	-12.3372	-13.1094	-12.8475	-12.7282	-12.508	-12.4911	-12.0175	-12.4639	-12.912	-12.4188	0.0605673	0.108559	0.0536356	0.10414
b3788	rffG	chr	+	3970544,	3971612,	-13.364	-12.6642	-13.1251	-13.1425	-13.3397	-13.411	-12.9524	-12.9886	-12.9915	-12.9991	-13.2776	-12.971	0.356027	0.42463	0.05435	0.104947
b1250	kch	chr	-	1307039,	1308293,	-13.8699	-14.4809	-14.4527	-14.4395	-13.8475	-13.7521	-15.0929	-14.7542	-14.477	-14.2868	-14.0146	-14.863	0.433938	0.500035	0.0545393	0.105183
b1249	cls	chr	-	1305208,	1306669,	-12.5596	-12.5057	-12.6252	-12.4499	-12.2929	-12.337	-13.1948	-12.9062	-12.6696	-12.5659	-12.3569	-13.0012	0.028392	0.0636079	0.0549978	0.105701
b1814	sdaA	chr	+	1894955,	1896320,	-11.6746	-11.8905	-11.6863	-12.0142	-12.1751	-11.8516	-11.5982	-11.8282	-11.459	-11.7508	-12.0485	-11.6536	0.0924892	0.147044	0.0550779	0.105701
b4021	pepE	chr	-	4227475,	4228165,	-14.5138	-14.0824	-15.4812	-13.9249	-13.6577	-14.2666	-14.9674	-14.3212	-14.629	-14.6212	-13.8559	-14.6566	0.206963	0.272357	0.0550661	0.105701
b0876	ybjD	chr	+	915695,	917354,	-14.7064	-14.9403	-14.4527	-14.7108	-14.6776	-14.074	-15.0288	-15.3757	-15.2139	-14.6723	-14.5501	-15.1711	0.450034	0.515791	0.0549734	0.105701
b4188	yjfN	chr	-	4414039,	4414315,	-16.1918	-18.9403	-18.5401	-13.8139	-13.6776	-13.5715	-14.7975	-14.8282	-14.0984	-17.5598	-13.7039	-14.6808	0.0383851	0.0783183	0.0553502	0.106093
b3641	slmA	chr	+	3812516,	3813113,	-13.0708	-12.9291	-13.1478	-13.379	-13.3557	-12.9585	-12.9674	-12.6667	-12.477	-13.0489	-13.2776	-12.7755	0.318531	0.388187	0.0559069	0.10703
b0427	yajR	chr	-	444525,	445890,	-12.8555	-12.7704	-13.1478	-12.4499	-12.7707	-12.1198	-13.0132	-13.2432	-13.0984	-12.9315	-12.5062	-13.104	0.109939	0.167802	0.0568849	0.108513
b0930	asnS	chr	-	986807,	988208,	-10.1717	-10.1938	-10.2227	-10.2559	-10.1384	-10.2327	-10.0706	-10.0593	-10.071	-10.1994	-10.1984	-10.0666	0.7637	0.797303	0.0568897	0.108513
b1222	narX	chr	-	1275044,	1276841,	-12.5365	-12.311	-12.6252	-13.7108	-13.3083	-12.801	-12.3725	-12.1572	-12.5894	-12.4866	-13.3184	-12.3203	0.0836297	0.136706	0.0573119	0.109185
b4005	purD	chr	-	4202664,	4203954,	-13.038	-13.4646	-13.1709	-14.3594	-13.8251	-14.8516	-13.267	-13.2688	-13.0984	-13.2283	-14.1678	-13.2415	0.0471347	0.0910147	0.0574092	0.109213
b3619	rfaD	chr	+	3792009,	3792942,	-11.7259	-11.4365	-11.7897	-12.3691	-12.255	-11.8135	-11.5982	-11.5923	-11.4238	-11.6418	-12.1961	-11.5691	0.0807094	0.133747	0.0574657	0.109213
b3752	rbsK	chr	+	3935316,	3936246,	-13.2658	-14.159	-14.3437	-12.9838	-12.8141	-12.3191	-13.3044	-13.3482	-14.0984	-13.9276	-12.759	-13.4137	0.0460101	0.0896166	0.0580551	0.110199
b2611	ypjD	chr	+	2745983,	2746775,	-14.9288	-14.0577	-13.1826	-13.6381	-13.8702	-13.7048	-14.1261	-14.3757	-14.7989	-13.7802	-13.7497	-14.2967	0.593019	0.648058	0.0582161	0.110371
b3415	gntT	chr	+	3544580,	3545897,	-13.4052	-13.4168	-13.7501	-12.5576	-12.4466	-13.074	-13.4863	-13.9062	-13.0984	-13.536	-12.5912	-13.5522	0.0300387	0.0659757	0.0587198	0.111057
b3191	yrbB	chr	-	3334984,	3335278,	-13.7589	-13.6005	-13.1593	-13.9249	-13.739	-14.1354	-13.1948	-13.2432	-13.7114	-13.4444	-13.876	-13.278	0.127746	0.188194	0.0588103	0.111094
b2243	glpC	chr	+	2353542,	2354733,	-12.7193	-12.8318	-12.6252	-12.8964	-13.2328	-13.1995	-12.7322	-12.7186	-12.6696	-12.7185	-13.0951	-12.718	0.0488928	0.0932595	0.0598203	0.112866
b4078	yjcO	chr	-	4294458,	4295148,	-14.3438	-14.3554	-14.4247	-13.8684	-13.6381	-13.3735	-13.9674	-14.5525	-14.7989	-14.3793	-13.6595	-14.2597	0.0313842	0.068166	0.0600455	0.113154
b0766	ybhA	chr	-	796835,	797654,	-13.7324	-14.3554	-13.6657	-14.5244	-15.5256	-15.1995	-13.9674	-14.0761	-13.892	-13.8893	-15.0258	-13.9936	0.0377893	0.077357	0.0601611	0.113236
b1719	thrS	chr	-	1798665,	1800594,	-9.46255	-9.44249	-9.49756	-9.70462	-9.58894	-9.72526	-9.50524	-9.42147	-9.58944	-9.4692	-9.65619	-9.48663	0.0280078	0.0630175	0.0610526	0.114648
b2239	glpQ	chr	-	2347956,	2349033,	-9.26702	-9.16556	-9.26091	-9.22673	-9.18128	-9.28391	-9.61278	-9.59633	-10.0241	-9.22863	-9.21723	-9.66032	0.991191	0.991825	0.0611298	0.114648
b2379	yfdZ	chr	-	2495078,	2496317,	-14.4263	-14.8111	-14.3702	-13.6862	-13.5807	-14.1995	-14.3044	-14.3212	-14.7989	-14.5242	-13.722	-14.3736	0.0439881	0.0867573	0.061363	0.114946
b1624	ydgJ	chr	-	1701291,	1702332,	-13.583	-13.531	-13.6494	-13.4395	-13.8251	-14.074	-13.0929	-13.1692	-13.044	-13.5902	-13.7129	-13.1122	0.408463	0.476768	0.0618471	0.115714
b0161	degP	chr	+	180883,	182308,	-11.9439	-12.2192	-11.9753	-12.0219	-12.0337	-11.8776	-12.3625	-12.2181	-12.0984	-12.0468	-11.9979	-12.2688	0.541845	0.602648	0.0620395	0.115935
b1640	anmK	chr	-	1716516,	1717626,	-13.3239	-13.8111	-13.3569	-13.0296	-13.0273	-12.8776	-13.3429	-13.4037	-13.0984	-13.4895	-12.9979	-13.325	0.0691816	0.119447	0.0625808	0.116391
b0678	nagB	chr	-	702033,	702834,	-12.9592	-12.9069	-12.9254	-12.8139	-12.6577	-12.411	-13.0446	-13.1454	-13.7114	-12.9276	-12.6595	-13.1626	0.120505	0.180068	0.062699	0.116473
b3821	pldA	chr	+	4002884,	4003754,	-12.4157	-13.0096	-13.1478	-14.3209	-13.4212	-13.5715	-13.0288	-13.0317	-12.551	-12.878	-13.722	-12.9487	0.0657072	0.114969	0.0628467	0.116609
b1636	pdxY	chr	-	1713049,	1713913,	-13.8991	-13.3705	-13.3972	-13.7108	-13.9649	-13.8516	-13.5751	-13.5843	-13.551	-13.5009	-13.8459	-13.5748	0.232004	0.300186	0.0632403	0.1172
b1251	yciI	chr	-	1308592,	1308889,	-14.8699	-14.7309	-13.9958	-14.0142	-14.2625	-13.9041	-15.2304	-14.4911	-15.477	-14.4223	-14.0951	-14.9487	0.217297	0.283101	0.063373	0.117307
b2714	ascG	chr	-	2836275,	2837289,	-14.6069	-14.0824	-14.2671	-14.1765	-14.0402	-14.0151	-14.4231	-14.9062	-14.477	-14.2769	-14.0833	-14.5862	0.252316	0.321503	0.0634702	0.117349
b0280	yagN	chr	-	294362,	294803,	-13.6558	-13.548	-13.6988	-12.9838	-12.8588	-13.411	-13.5524	-13.4614	-13.892	-13.6338	-12.9979	-13.5634	0.072605	0.123721	0.0639569	0.118063
b2194	ccmH	chr	-	2289379,	2290432,	-14.5596	-13.548	-13.6657	-14.1425	-15.0926	-14.2666	-13.267	-13.6498	-13.629	-13.8014	-14.518	-13.4445	0.258014	0.327493	0.0643	0.118463
b3831	udp	chr	+	4014453,	4015215,	-11.421	-11.1394	-11.0944	-10.9726	-11.0694	-10.9795	-11.4971	-11.2817	-11.1842	-11.1883	-11.016	-11.3687	0.166553	0.232669	0.0644862	0.118527
b3701	dnaN	chr	-	3879243,	3880344,	-12.1301	-12.0455	-11.8772	-12.2025	-12.3006	-12.2666	-11.8313	-11.9468	-11.477	-11.9971	-12.2576	-11.8119	0.0696325	0.120093	0.0648819	0.118975
b3431	glgX	chr	-	3567368,	3569342,	-13.1918	-13.6184	-13.059	-12.3496	-12.8141	-12.5929	-13.1773	-13.1692	-12.7989	-13.2671	-12.587	-13.1122	0.033203	0.0713251	0.065203	0.119285
b3056	cca	chr	+	3199912,	3201151,	-13.1739	-12.9291	-12.9254	-12.7615	-12.3557	-12.6366	-12.8799	-13.01	-13.044	-12.987	-12.546	-12.9487	0.0501822	0.0951853	0.0654318	0.119548
b3205	yhbJ	chr	+	3345136,	3345991,	-13.2849	-13.4485	-12.9452	-13.302	-13.1196	-13.1044	-13.3824	-13.7186	-13.892	-13.1906	-13.1803	-13.5634	0.775063	0.805942	0.0654997	0.119548
b1104	ycfL	chr	+	1161469,	1161847,	-13.8991	-14.3256	-13.9753	-13.5027	-13.5996	-13.411	-13.9978	-14.9886	-14.629	-14.0659	-13.5259	-14.3736	0.0356873	0.0748906	0.0656406	0.119666
b3487	yhiI	chr	-	3627557,	3628625,	-12.8699	-13.2261	-12.6094	-12.1765	-12.2625	-12.3922	-12.682	-12.8282	-13.3395	-12.8668	-12.2543	-12.8153	0.0599891	0.108105	0.0664654	0.121029
b1655	ydhO	chr	+	1732458,	1733274,	-13.7858	-13.9861	-13.8397	-13.1938	-13.1471	-13.5297	-14.0605	-13.5215	-13.7989	-13.8743	-13.2314	-13.8086	0.0240697	0.0568525	0.0665926	0.12112
b3516	gadX	chr	-	3663008,	3663833,	-12.0462	-12.1138	-12.1195	-11.9106	-11.6826	-11.6366	-12.4755	-12.3757	-13.2753	-12.0982	-11.752	-12.53	0.0453935	0.0889689	0.0667419	0.12125
b2622	intA	chr	+	2754180,	2755422,	-14.6558	-15.1855	-14.8032	-14.0142	-14.2625	-14.074	-15.2304	-15.2688	-14.477	-14.8818	-14.131	-15.104	0.0244174	0.0574328	0.0670015	0.12144
b0676	nagC	chr	-	699596,	700817,	-12.247	-12.2261	-12.1421	-12.3114	-11.8532	-11.6932	-12.771	-12.3079	-12.551	-12.1976	-11.9678	-12.5578	0.305038	0.374503	0.0670002	0.12144
b4406	yaeP	chr	-	213924,	214125,	-14.3043	-15.2965	-15.0376	-14.8139	-13.9649	-14.6589	-15.3824	-15.0761	-15.477	-14.8818	-14.3534	-15.278	0.369698	0.438596	0.0676439	0.122321
b1767	ansA	chr	+	1848883,	1849900,	-13.3845	-13.7309	-13.5401	-13.8684	-14.2625	-14.1995	-13.8519	-13.6167	-13.7114	-13.5598	-14.0951	-13.7433	0.0257331	0.0592619	0.0679644	0.122477
b1876	argS	chr	+	1958085,	1959819,	-11.034	-11.0577	-10.9779	-11.5135	-11.49	-11.2077	-11.0888	-11.0154	-11.155	-11.0197	-11.439	-11.0716	0.0536901	0.0996193	0.0678772	0.122477
b3057	bacA	chr	-	3201331,	3202153,	-12.7064	-13.0335	-12.9254	-13.5464	-13.2328	-13.7048	-13.2125	-12.9264	-13.044	-12.9007	-13.4259	-13.0796	0.0278438	0.0629198	0.0682135	0.122643
b4233	mpl	chr	+	4453807,	4455181,	-11.5654	-11.6005	-11.3242	-11.6619	-11.4381	-11.411	-11.2856	-11.2369	-10.9285	-11.4766	-11.5101	-11.2103	0.955524	0.962283	0.0681565	0.122643
b1435	ydcP	chr	+	1504804,	1506766,	-12.3948	-12.6549	-12.404	-13.379	-13.0146	-12.8261	-12.4649	-12.5063	-12.5894	-12.4837	-13.0951	-12.4974	0.0483385	0.0927674	0.0698777	0.125061
b1322	ycjF	chr	+	1383534,	1384596,	-14.4694	-15.4168	-15.3177	-14.1425	-14.4212	-14.2666	-15.6455	-14.6838	-15.477	-15.0744	-14.2843	-15.2059	0.110638	0.168212	0.0699785	0.125099
b4587	insN	chr	+	269501,	271413,	-14.4694	-14.5141	-14.2425	-13.6381	-13.9168	-14.0151	-14.4649	-14.0317	-14.3395	-14.3899	-13.8261	-14.278	0.02003	0.0501602	0.0703646	0.125645
b1787	yeaK	chr	+	1871597,	1872101,	-13.5596	-13.8318	-13.8213	-13.8684	-14.0926	-14.1354	-13.6216	-13.8282	-13.3395	-13.7525	-14.0146	-13.6446	0.0729158	0.124115	0.0710134	0.126372
b2496	hda	chr	-	2616096,	2616843,	-12.6434	-12.409	-12.1651	-13.0296	-12.7495	-12.5297	-12.3925	-12.4468	-12.1265	-12.3608	-12.797	-12.3687	0.143217	0.205948	0.0711063	0.126393
b2328	mepA	chr	-	2443581,	2444406,	-14.1214	-14.8111	-14.3437	-14.5244	-14.8031	-15.337	-14.3044	-13.7186	-14.3395	-14.4223	-14.7779	-14.0716	0.215398	0.281095	0.0715364	0.12687
b0393	rdgC	chr	-	408331,	409243,	-12.9592	-13.1989	-13.0166	-13.7874	-13.2476	-13.7521	-12.8799	-12.7907	-13.3395	-13.0616	-13.518	-12.9052	0.0748702	0.12689	0.071836	0.127257
b3981	secE	chr	+	4175380,	4175764,	-10.583	-10.7579	-10.6595	-10.8039	-11.0402	-10.9242	-10.6545	-10.6085	-10.2139	-10.6723	-10.9278	-10.5649	0.0437139	0.0863252	0.0724464	0.128096
b0239	frsA	chr	+	256526,	257771,	-13.8133	-13.4012	-14.059	-14.1094	-13.8475	-14.489	-13.8519	-13.3482	-13.477	-13.7388	-14.0485	-13.5977	0.217773	0.283486	0.072473	0.128096
b3279	yrdA	chr	+	3427257,	3427812,	-13.9902	-13.9403	-14.4247	-13.077	-12.9771	-13.7521	-14.16	-13.6838	-14.629	-14.1269	-13.137	-14.0243	0.0517413	0.0971546	0.0727163	0.128215
b0887	cydD	chr	-	928418,	930185,	-12.7995	-12.6184	-12.9958	-13.0142	-13.4381	-13.2327	-12.8381	-12.9676	-12.477	-12.805	-13.2314	-12.822	0.0617528	0.109993	0.0728171	0.128215
b1662	ribC	chr	-	1740624,	1741266,	-12.6189	-12.8111	-12.8122	-12.6381	-12.7182	-12.2496	-12.7975	-12.9886	-13.2753	-12.7594	-12.587	-12.9268	0.280022	0.349559	0.0729403	0.128215
b2242	glpB	chr	+	2352286,	2353546,	-11.8627	-11.9746	-11.6373	-11.8893	-11.9771	-11.9447	-11.5982	-11.5683	-11.1407	-11.805	-11.9383	-11.5109	0.376045	0.445115	0.0729275	0.128215
b3884	yihW	chr	+	4072691,	4073477,	-14.5596	-14.1075	-13.9552	-12.9838	-13.0273	-12.9865	-13.5982	-13.6838	-13.2139	-14.1448	-13.0034	-13.5634	0.0212955	0.0523528	0.0731305	0.128332
b3810	yigA	chr	+	3993605,	3994313,	-13.3043	-13.1855	-12.7501	-12.5354	-12.4725	-12.7763	-13.0132	-12.7542	-12.892	-13.0238	-12.5501	-12.8981	0.0829816	0.136501	0.0731802	0.128332
b3601	mtlR	chr	+	3773594,	3774182,	-14.2658	-13.7115	-14.0166	-13.9541	-13.8251	-14.1995	-14.6455	-14.2181	-14.3395	-13.9589	-13.9383	-14.4342	0.980629	0.98377	0.0733884	0.128437
b0780	ybhK	chr	-	814961,	815870,	-13.006	-13.3404	-13.2671	-12.603	-12.7286	-12.7282	-13.2486	-13.0761	-12.8447	-13.2188	-12.6815	-13.1205	0.0235115	0.0558711	0.07367	0.128758
b0927	ycbL	chr	+	982872,	983520,	-13.1044	-12.8111	-13.0166	-12.5135	-12.4466	-12.5297	-12.7195	-13.0537	-12.7545	-12.9629	-12.4866	-12.8355	0.0237964	0.056377	0.0752603	0.131096
b1584	speG	chr	+	1654207,	1654768,	-13.7064	-13.5141	-12.8867	-14.1425	-13.6381	-13.801	-13.5982	-13.4037	-13.2139	-13.272	-13.836	-13.4654	0.179475	0.24526	0.0752216	0.131096
b0097	secM	chr	+	107704,	108217,	-12.2376	-12.5225	-12.2859	-12.5354	-12.6876	-12.8261	-12.4971	-12.3212	-12.044	-12.3504	-12.6551	-12.3589	0.0515558	0.0970233	0.075736	0.131271
b3035	tolC	chr	+	3176136,	3177618,	-10.8484	-10.7957	-10.5879	-11.0571	-11.0531	-11.0516	-10.9013	-10.7452	-10.5894	-10.7227	-11.0542	-10.7953	0.0599277	0.108105	0.0755369	0.131271
b0926	ycbK	chr	+	982297,	982846,	-12.7723	-12.6366	-12.6494	-12.7359	-12.6478	-12.4495	-13.0605	-12.8093	-13.3395	-12.6756	-12.6378	-13.0012	0.488401	0.551432	0.0757784	0.131271
b1479	maeA	chr	-	1551995,	1553693,	-11.2898	-11.322	-11.2092	-11.302	-11.4424	-11.5715	-11.244	-11.2432	-11.1265	-11.2683	-11.4129	-11.2258	0.156134	0.220276	0.0759478	0.131419
b3229	sspA	chr	-	3374803,	3375442,	-11.0917	-11.3516	-10.9779	-11.603	-11.4381	-11.3191	-11.338	-11.0154	-11.0045	-11.128	-11.4712	-11.1647	0.0911998	0.145734	0.076078	0.131499
b0176	rseP	chr	+	196545,	197898,	-10.9592	-10.7982	-10.6133	-10.6954	-10.6701	-10.8388	-10.8109	-10.9728	-11.0307	-10.7602	-10.7106	-10.8981	0.656333	0.705918	0.0761847	0.131538
b2709	norR	chr	-	2828796,	2830311,	-13.5365	-13.6366	-13.7157	-14.077	-14.2929	-13.6589	-13.3044	-13.5215	-13.477	-13.6402	-14.0716	-13.4036	0.170713	0.236581	0.0771885	0.133125
b3626	rfaJ	chr	-	3799005,	3800022,	-13.0543	-13.2399	-12.849	-12.9541	-13.0402	-12.801	-13.5751	-13.7542	-14.629	-13.0279	-12.9597	-13.7561	0.440752	0.506396	0.0775561	0.133611
b2582	trxC	chr	+	2716756,	2717176,	-14.1562	-13.8529	-13.7852	-13.6619	-13.3397	-12.8516	-14.0929	-13.9062	-14.0984	-13.8969	-13.3323	-14.0243	0.0931379	0.147609	0.0776722	0.133665
b1585	ynfC	chr	-	1654770,	1655481,	-14.8699	-14.7704	-14.8397	-14.1425	-14.1196	-14.6589	-14.7975	-16.2688	-15.7989	-14.8229	-14.2184	-15.3155	0.0943636	0.148965	0.0780422	0.134147
b1247	oppF	chr	+	1303787,	1304792,	-11.165	-11.1888	-11.4633	-11.4551	-11.5621	-11.6146	-11.3774	-11.3896	-11.4066	-11.2843	-11.5319	-11.386	0.0867574	0.140378	0.0785075	0.134586
b2036	glf	chr	-	2105249,	2106353,	-10.6872	-10.7555	-10.7094	-10.7139	-10.7574	-10.6646	-11.6395	-11.3896	-12.5135	-10.7194	-10.7232	-11.6386	0.881055	0.898849	0.0785514	0.134586
b3607	cysE	chr	-	3779763,	3780585,	-13.038	-13.2965	-12.7764	-12.5244	-12.255	-12.5092	-12.7579	-13.4911	-12.9915	-13.0073	-12.3964	-13.0166	0.0354816	0.0746831	0.0792982	0.135569
b2512	yfgL	chr	-	2635495,	2636674,	-10.4131	-10.5016	-10.5724	-10.603	-10.5256	-10.5092	-10.2926	-10.4874	-10.3395	-10.5053	-10.5501	-10.3662	0.417181	0.48393	0.0799437	0.136226
b3888	yiiD	chr	+	4075471,	4076461,	-14.2284	-13.4325	-13.9958	-13.1259	-13.3239	-12.7048	-14.5524	-14.1219	-13.4066	-13.8229	-13.1129	-14.1711	0.0527005	0.0983659	0.0805078	0.137038
b0523	purE	chr	-	551813,	552323,	-14.3438	-14.548	-14.3177	-15.8684	-15.1471	-16.074	-14.508	-15.1692	-13.7114	-14.4006	-15.5339	-14.5411	0.0370383	0.0764396	0.0809876	0.137269
b3282	rimN	chr	-	3428864,	3429437,	-14.9288	-14.8959	-14.3972	-15.1765	-15.3239	-15.074	-14.745	-14.5525	-13.892	-14.6854	-15.2184	-14.5191	0.104481	0.161041	0.0818639	0.13816
b0955	ycbZ	chr	-	1015761,	1017522,	-12.2754	-12.4012	-12.2122	-12.9394	-12.7707	-12.3552	-12.3332	-12.1692	-12.044	-12.2918	-12.7358	-12.2281	0.142535	0.205345	0.0818726	0.13816
b1851	edd	chr	-	1930816,	1932628,	-13.8991	-13.2821	-13.4386	-13.4191	-13.8702	-14.1995	-13.4649	-13.0988	-12.9409	-13.4837	-13.7404	-13.2415	0.379844	0.448659	0.0817966	0.13816
b1867	yecD	chr	+	1948855,	1949422,	-14.6558	-14.133	-14.2922	-13.5244	-13.5996	-13.4495	-14.0605	-14.4323	-13.7989	-14.317	-13.542	-14.1372	0.0255585	0.0589463	0.082261	0.138666
b1107	nagZ	chr	+	1163317,	1164343,	-12.5025	-12.9978	-12.8963	-12.8684	-12.8251	-12.8261	-12.6697	-12.6838	-12.7989	-12.8157	-12.8409	-12.6931	0.812023	0.837699	0.0829134	0.139615
b1687	ydiJ	chr	-	1763652,	1766709,	-13.5138	-13.0455	-13.3972	-13.1425	-13.5621	-12.8516	-13.9377	-13.8282	-14.9915	-13.2918	-13.2444	-14.0089	0.624955	0.678226	0.0831423	0.13985
b1822	rrmA	chr	-	1904274,	1905084,	-14.8133	-13.8529	-13.8772	-14.077	-14.4552	-14.489	-14.0929	-13.7907	-13.9915	-14.0573	-14.3115	-13.9635	0.677228	0.724907	0.0835177	0.140331
b3834	yigP	chr	+	4017646,	4018252,	-13.0875	-12.9746	-13.1364	-12.8964	-12.5621	-12.4691	-13.1261	-12.9468	-12.9915	-13.0659	-12.6551	-13.0399	0.0682438	0.11835	0.0838829	0.140494
b3146	yraL	chr	-	3290496,	3291357,	-15.1918	-14.2679	-14.5705	-14.5244	-13.8475	-14.074	-14.745	-15.1692	-14.477	-14.5841	-14.1069	-14.8355	0.198517	0.264353	0.0838835	0.140494
b3167	rbfA	chr	-	3310798,	3311200,	-13.8991	-14.0577	-12.9452	-13.1259	-13.161	-13.1044	-13.3235	-13.4323	-13.2139	-13.4837	-13.137	-13.3443	0.284122	0.353403	0.0838072	0.140494
b2177	yejA	chr	+	2270385,	2272200,	-13.2284	-13.5828	-13.9156	-13.5027	-12.9649	-12.9585	-13.9085	-13.4614	-13.629	-13.5964	-13.137	-13.6931	0.181851	0.247291	0.0844383	0.141272
b1175	minD	chr	-	1223771,	1224584,	-12.1562	-11.918	-11.7414	-11.6801	-11.6876	-11.54	-12.0367	-11.9781	-12.551	-11.9007	-11.6551	-12.0796	0.11392	0.172532	0.0849097	0.141909
b4372	holD	chr	+	4605825,	4606239,	-12.3239	-12.7115	-12.8772	-13.1259	-12.8933	-12.9041	-12.7195	-12.4468	-12.044	-12.6594	-12.9759	-12.5028	0.164928	0.230604	0.085784	0.143217
b4146	yjeK	chr	-	4372651,	4373680,	-13.1044	-13.4646	-13.5859	-13.1594	-13.6577	-13.2666	-13.6697	-13.7186	-13.9915	-13.406	-13.3819	-13.7306	0.915239	0.92828	0.0859252	0.1433
b4058	uvrA	chr	-	4269071,	4271894,	-12.5025	-12.7704	-12.4386	-12.7744	-12.7922	-12.7282	-12.4649	-12.3482	-11.9162	-12.5629	-12.7731	-12.3298	0.192443	0.258461	0.0869781	0.144594
b0949	uup	chr	+	1009186,	1011094,	-12.0959	-12.1459	-11.9452	-12.2025	-12.4381	-12.0442	-11.8519	-12.0537	-11.6091	-12.051	-12.2676	-11.8805	0.288845	0.357292	0.0869754	0.144594
b1605	ydgI	chr	+	1677580,	1678963,	-13.0543	-12.8318	-12.7588	-13.7615	-13.8933	-13.337	-13.1261	-13.2432	-12.4066	-12.8557	-13.722	-13.0321	0.0252729	0.058633	0.0875201	0.145341
b2289	lrhA	chr	-	2403724,	2404663,	-11.7589	-12.1459	-11.8351	-11.4603	-11.5714	-11.6146	-11.9674	-11.8282	-12.4066	-11.9141	-11.538	-11.971	0.0762248	0.128491	0.0882592	0.146258
b1642	slyA	chr	-	1718413,	1718848,	-12.9746	-12.7704	-12.9452	-13.077	-12.8251	-12.5929	-13.5982	-13.0317	-13.7989	-12.8893	-12.8609	-13.3935	0.702264	0.745392	0.0881985	0.146258
b1452	yncE	chr	+	1521330,	1522392,	-12.9439	-13.1202	-13.6332	-13.061	-13.0273	-12.8516	-13.5751	-13.9062	-14.7989	-13.2476	-13.0034	-13.822	0.347065	0.415523	0.0886718	0.146745
b2413	cysZ	chr	+	2529484,	2530246,	-13.5365	-13.0577	-13.2671	-13.6146	-13.9649	-14.0151	-13.143	-13.2688	-13.7114	-13.2524	-13.836	-13.2597	0.0371894	0.0764396	0.0893049	0.147315
b3192	yrbC	chr	-	3335277,	3335913,	-12.2946	-12.3479	-12.4316	-12.5464	-12.4988	-12.4691	-12.3044	-12.2948	-11.9915	-12.3661	-12.5101	-12.2506	0.0457588	0.089423	0.0893673	0.147315
b3346	yheO	chr	-	3473739,	3474462,	-14.0543	-14.159	-13.6173	-13.1938	-13.7814	-13.4495	-13.745	-13.9468	-14.2139	-13.8969	-13.4789	-13.8769	0.119897	0.179502	0.0891853	0.147315
b2473	ypfH	chr	-	2591093,	2591792,	-14.9902	-15.1855	-14.1027	-15.3209	-14.5996	-15.074	-14.4231	-14.1692	-14.629	-14.6212	-14.9173	-14.354	0.583491	0.639879	0.0895217	0.147414
b2326	yfcM	chr	-	2442224,	2442773,	-14.4694	-14.159	-14.1027	-14.7108	-14.8475	-14.7521	-14.4649	-14.2688	-13.7989	-14.2093	-14.7779	-14.278	0.0323555	0.0701783	0.0899631	0.147986
b1663	mdtK	chr	+	1741480,	1742854,	-12.6809	-12.7407	-13.2182	-13.1259	-13.4552	-13.6146	-13.143	-12.7723	-13.044	-12.8931	-13.3534	-12.986	0.0821873	0.135765	0.0901563	0.148122
b1284	yciT	chr	-	1341620,	1342370,	-14.4263	-13.9861	-13.8397	-13.8684	-13.5437	-13.489	-14.4649	-13.9062	-13.9915	-14.0238	-13.6421	-14.1711	0.111095	0.168744	0.0902351	0.148122
b0414	ribD	chr	+	432678,	433782,	-12.5596	-12.6094	-12.5705	-13.6146	-13.161	-13.1044	-12.9674	-12.9062	-12.4066	-12.581	-13.2979	-12.8492	0.0464838	0.0900912	0.0910676	0.149176
b2747	ispD	chr	-	2869801,	2870512,	-13.6809	-13.0824	-13.3836	-13.6619	-14.0926	-14.7521	-13.2486	-13.5843	-13.044	-13.3375	-14.0146	-13.325	0.114817	0.173388	0.0915567	0.149664
b4049	dusA	chr	+	4259736,	4260729,	-13.1739	-13.1989	-13.3437	-13.7615	-13.8702	-13.2666	-13.0288	-13.0761	-13.0984	-13.2476	-13.6949	-13.0557	0.16021	0.225214	0.0914673	0.149664
b0635	mrdA	chr	-	665538,	667440,	-11.6936	-11.5653	-11.3904	-12.085	-12.1264	-11.7048	-11.5134	-11.6085	-11.629	-11.5242	-12.0202	-11.5634	0.0675788	0.117365	0.0928955	0.151694
b0817	mntR	chr	+	852405,	852873,	-13.9288	-14.6184	-14.2182	-13.7359	-13.7814	-13.6589	-14.4649	-13.9468	-14.0984	-14.2573	-13.7404	-14.2059	0.11356	0.172153	0.0947965	0.154476
b1604	ydgH	chr	+	1676450,	1677395,	-12.1214	-12.2893	-12.1709	-12.9689	-12.7182	-12.5504	-12.3925	-12.4911	-12.3395	-12.1976	-12.7684	-12.4188	0.0312494	0.068062	0.095021	0.154681
b3176	glmM	chr	-	3320754,	3322092,	-11.6069	-11.3367	-11.3113	-10.9615	-11.0694	-11.1121	-11.143	-11.2817	-11.1407	-11.3913	-11.0371	-11.1906	0.0414551	0.0831225	0.0951567	0.154741
b0760	modF	chr	-	791538,	793011,	-14.9288	-14.6924	-13.6494	-13.5915	-13.9649	-13.1044	-14.0605	-14.4323	-14.2139	-14.2283	-13.6249	-14.2059	0.147823	0.211186	0.0952894	0.154796
b2395	yfeA	chr	-	2513664,	2515854,	-12.5025	-12.4168	-12.6739	-13.061	-13.5437	-13.8516	-12.6216	-12.6498	-13.2139	-12.536	-13.3964	-12.7055	0.0424695	0.0840799	0.0959541	0.155231
b0576	pheP	chr	+	601181,	602558,	-12.0543	-11.9978	-12.1709	-12.3304	-12.7814	-12.3735	-12.0055	-12.0874	-12.2139	-12.0787	-12.522	-12.0636	0.0862272	0.139784	0.0959255	0.155231
b3640	dut	chr	+	3811954,	3812410,	-12.8413	-12.531	-12.7414	-13.0452	-12.8363	-12.5929	-12.682	-12.3079	-12.307	-12.6887	-12.8559	-12.4813	0.497595	0.558591	0.0958139	0.155231
b3288	fmt	chr	+	3432235,	3433183,	-12.3845	-12.2893	-12.6252	-12.603	-12.9895	-12.801	-12.4971	-12.4762	-12.4413	-12.4388	-12.8018	-12.4813	0.0723419	0.123407	0.0967881	0.156419
b3385	gph	chr	-	3511652,	3512411,	-13.038	-12.7407	-12.8305	-12.999	-13.2929	-13.0151	-12.8799	-12.6838	-12.9409	-12.8483	-13.1249	-12.8153	0.148157	0.211306	0.0981247	0.15809
b3515	gadW	chr	-	3661912,	3662641,	-14.3043	-14.7309	-14.7675	-14.077	-13.9406	-13.7521	-14.6455	-14.6167	-15.7989	-14.6212	-13.949	-14.7561	0.0249253	0.0581713	0.0988952	0.158974
b3925	glpX	chr	-	4112591,	4113602,	-12.3539	-12.548	-12.6739	-12.7486	-12.5346	-12.8776	-12.5189	-12.5215	-12.307	-12.5419	-12.6726	-12.4866	0.226989	0.294502	0.098978	0.158974
b3409	feoB	chr	+	3538428,	3540750,	-12.7324	-12.9978	-12.5326	-13.0142	-13.2037	-13.0151	-12.7322	-12.9264	-12.4413	-12.732	-13.0951	-12.7497	0.123228	0.182915	0.0990976	0.159003
b3105	yhaJ	chr	-	3251339,	3252236,	-14.1562	-14.1855	-13.8963	-13.4191	-13.9406	-13.3735	-14.4649	-14.1692	-13.7989	-14.0573	-13.6164	-14.2415	0.0919821	0.146535	0.0995026	0.159489
b0386	proC	chr	-	404058,	404868,	-14.1918	-13.8959	-13.8397	-13.9838	-13.5437	-13.2327	-14.4649	-14.4911	-13.7989	-13.9432	-13.6164	-14.354	0.210383	0.276161	0.101967	0.162772
b4052	dnaB	chr	+	4262336,	4263752,	-11.6009	-11.8689	-11.5705	-11.7744	-11.9958	-11.801	-11.6697	-11.7186	-11.4066	-11.6756	-11.8735	-11.6446	0.213314	0.279072	0.102977	0.163862
b0398	sbcD	chr	-	414973,	416176,	-14.2284	-14.8111	-14.4812	-14.3989	-14.6776	-14.489	-14.1261	-14.1692	-13.477	-14.5125	-14.5339	-14.0243	0.941699	0.950807	0.102931	0.163862
b2514	hisS	chr	-	2637322,	2638597,	-11.1001	-10.6996	-10.6946	-11.0296	-10.9286	-10.9724	-10.9194	-10.6667	-10.6593	-10.7908	-10.9732	-10.7854	0.392691	0.461696	0.103835	0.164748
b2300	yfcE	chr	-	2417255,	2417810,	-13.2849	-13.1722	-13.3177	-13.1765	-13.4725	-13.7521	-12.8519	-13.2688	-12.9409	-13.2573	-13.4037	-13.0012	0.33544	0.402837	0.104305	0.165326
b3967	murI	chr	+	4163450,	4164308,	-11.9439	-12.0762	-12.1651	-12.2742	-12.4129	-12.2839	-12.0446	-12.0208	-12.2753	-12.0744	-12.3358	-12.0676	0.0340787	0.0727075	0.105043	0.166159
b0917	ycaR	chr	+	969895,	970078,	-14.9902	-14.2679	-15.1251	-14.5244	-15.3239	-15.1995	-14.3824	-14.4323	-14.2139	-14.7388	-14.9597	-14.3736	0.575781	0.634353	0.104964	0.166159
b0687	seqA	chr	+	712209,	712755,	-12.7064	-13.1075	-12.5552	-12.6862	-12.5077	-12.7282	-13.267	-13.0537	-12.7545	-12.7663	-12.6122	-13.104	0.471317	0.534455	0.106352	0.167721
b2063	yegH	chr	+	2135925,	2137509,	-13.8699	-13.6924	-13.9156	-14.2113	-14.8475	-14.5715	-13.8519	-14.3212	-13.9915	-13.8229	-14.5339	-14.0243	0.0465925	0.0901903	0.106934	0.16847
b3804	hemD	chr	-	3987110,	3987851,	-12.9902	-13.2399	-13.5252	-13.0931	-13.0793	-12.7521	-13.0766	-13.6167	-13.551	-13.272	-13.0146	-13.3155	0.226557	0.294187	0.107442	0.169099
b3485	yhhJ	chr	-	3623701,	3624829,	-13.583	-14.4485	-14.2182	-13.5464	-13.5437	-13.3735	-14.0929	-13.9886	-14.9915	-14.0917	-13.5101	-14.1541	0.142411	0.205345	0.107586	0.169156
b0464	acrR	chr	+	484984,	485632,	-14.3438	-13.9861	-14.3437	-14.1425	-13.8251	-13.9041	-14.9674	-14.1219	-14.7989	-14.2093	-13.949	-14.5862	0.158309	0.222742	0.108095	0.169616
b3290	trkA	chr	+	3434539,	3435916,	-13.006	-13.0577	-12.9855	-13.0452	-13.2037	-13.2327	-12.9377	-12.8282	-13.0984	-13.0155	-13.1493	-12.9196	0.118978	0.178467	0.108844	0.17062
b0089	ftsW	chr	+	98402,	99647,	-11.7927	-11.4207	-11.3803	-11.3594	-11.4466	-11.6146	-11.7908	-11.8	-12.4066	-11.4909	-11.4446	-11.87	0.726701	0.766489	0.109935	0.171986
b3935	priA	chr	-	4122634,	4124833,	-14.0543	-13.6549	-13.8397	-13.7108	-13.739	-14.337	-13.53	-13.4911	-13.2139	-13.8229	-13.8261	-13.4654	0.756559	0.79209	0.110292	0.172372
b3699	gyrB	chr	-	3875727,	3878142,	-10.1784	-10.346	-10.4957	-10.6954	-10.3318	-10.5041	-10.2081	-10.2432	-10.2215	-10.3563	-10.4886	-10.2225	0.289757	0.357573	0.11101	0.173322
b2196	ccmF	chr	-	2290982,	2292926,	-13.5596	-14.0577	-13.6657	-14.1425	-14.9406	-13.801	-13.53	-13.0988	-13.7114	-13.7594	-14.3534	-13.3835	0.251943	0.321288	0.111958	0.174628
b0763	modA	chr	+	794311,	795085,	-14.5138	-14.2124	-14.1027	-13.5688	-13.6577	-13.6589	-14.4649	-14.1692	-13.7989	-14.2379	-13.6249	-14.2415	0.0284557	0.063657	0.112492	0.175286
b4025	pgi	chr	+	4231780,	4233430,	-10.6746	-10.7654	-10.4705	-10.858	-10.9895	-10.6817	-10.6425	-10.654	-10.551	-10.6197	-10.8773	-10.6327	0.173614	0.239121	0.112665	0.175381
b1193	emtA	chr	+	1242402,	1243014,	-13.1739	-13.4809	-13.6988	-13.3989	-13.6978	-13.411	-12.8799	-12.8093	-13.4066	-13.4724	-13.5259	-12.9196	0.79295	0.820185	0.11324	0.1761
b1633	nth	chr	+	1709546,	1710182,	-13.9902	-14.1075	-13.9753	-14.8139	-15.3239	-14.7521	-14.3429	-14.1692	-14.7989	-14.0238	-15.0034	-14.3346	0.029993	0.0659678	0.113979	0.176802
b0948	rlmL	chr	+	1007066,	1009175,	-11.7456	-11.8266	-11.7371	-12.34	-12.3083	-11.9724	-11.7776	-12.0317	-11.3726	-11.7698	-12.2477	-11.792	0.0581802	0.105574	0.114255	0.176802
b1035	ycdY	chr	+	1098862,	1099417,	-13.21	-13.159	-13.3836	-13.4603	-13.4725	-13.4495	-12.9377	-13.3482	-12.8447	-13.2573	-13.4635	-13.0557	0.089501	0.143695	0.11408	0.176802
b0093	ftsQ	chr	+	103154,	103985,	-11.7723	-11.574	-11.6453	-11.6499	-11.5575	-11.54	-11.7776	-11.8282	-12.2139	-11.6514	-11.587	-11.8526	0.307199	0.376427	0.114584	0.17696
b0861	artM	chr	-	900088,	900757,	-14.0543	-14.0824	-13.7675	-13.2834	-13.6776	-14.1354	-14.0605	-14.2688	-14.629	-13.9432	-13.5912	-14.2059	0.394611	0.463587	0.114539	0.17696
b3727	pstC	chr	-	3907461,	3908421,	-14.0543	-13.9631	-14.2671	-14.5244	-16.3881	-15.1995	-13.8244	-13.7907	-14.3395	-14.1004	-15.2444	-13.8769	0.140508	0.203359	0.114791	0.177106
b1726	yniB	chr	-	1806720,	1807257,	-13.4052	-13.8318	-13.5401	-13.4395	-13.0926	-13.4495	-13.8799	-13.5843	-14.477	-13.5964	-13.2776	-13.8355	0.198518	0.264353	0.11518	0.177531
b0688	pgm	chr	+	712780,	714421,	-11.2376	-11.3073	-11.2182	-11.3496	-11.3597	-11.3191	-11.295	-11.2432	-11.1407	-11.2536	-11.3481	-11.2528	0.0645558	0.113717	0.115436	0.177752
b0189	rof	chr	-	213677,	213932,	-14.1214	-15.2399	-14.6332	-14.0452	-14.2929	-14.337	-14.6455	-14.9062	-15.7989	-14.6466	-14.2056	-14.863	0.30515	0.374503	0.117203	0.180295
b0408	secD	chr	+	426870,	428718,	-9.69518	-9.56965	-9.736	-9.64399	-9.7627	-9.95504	-9.61131	-9.64148	-9.40657	-9.66583	-9.75258	-9.58975	0.326451	0.395682	0.118573	0.182223
b0839	dacC	chr	+	879949,	881152,	-13.1387	-13.5653	-13.5552	-12.6499	-13.002	-12.801	-13.3044	-13.2432	-12.892	-13.4388	-12.8261	-13.2147	0.0296988	0.0655972	0.119084	0.18283
b0226	dinJ	chr	-	246241,	246502,	-13.3438	-13.0824	-12.9855	-12.999	-13.0793	-12.801	-13.0929	-13.7907	-13.477	-13.1048	-12.9924	-13.3638	0.263738	0.333075	0.119991	0.183861
b0184	dnaE	chr	+	205125,	208608,	-10.3067	-10.4227	-10.1636	-10.5492	-10.5437	-10.4642	-10.338	-10.3112	-9.94714	-10.2862	-10.5299	-10.2642	0.0840801	0.137068	0.120352	0.184054
b3847	pepQ	chr	+	4029183,	4030515,	-12.0708	-12.159	-12.0752	-12.151	-11.9649	-12.0151	-12.1094	-12.4468	-12.551	-12.1026	-12.0399	-12.2827	0.421951	0.488378	0.120264	0.184054
b2526	hscA	chr	-	2655106,	2656957,	-10.963	-11.1524	-10.9452	-11.0971	-11.2218	-11.1198	-10.9524	-10.7723	-10.3477	-11.0186	-11.1554	-10.7837	0.192692	0.258574	0.120525	0.184139
b2560	yfhB	chr	-	2695936,	2696572,	-13.4263	-13.4974	-13.9353	-14.5688	-14.2328	-13.6146	-13.6944	-13.2181	-13.477	-13.6338	-14.1929	-13.476	0.199957	0.265592	0.12118	0.184599
b3616	tdh	chr	-	3788342,	3789368,	-11.5654	-11.4445	-11.3602	-11.4191	-11.076	-11.4398	-11.5467	-11.7723	-11.4951	-11.4402	-11.2609	-11.6151	0.353462	0.421891	0.1211	0.184599
b0185	accA	chr	+	208620,	209580,	-10.5979	-10.7139	-10.6595	-10.8614	-10.971	-11.2243	-10.7579	-10.7318	-10.7328	-10.6618	-10.9746	-10.7449	0.0669566	0.116634	0.121602	0.184883
b3974	coaA	chr	-	4172098,	4173049,	-13.4263	-13.0335	-13.3049	-13.1938	-13.2476	-12.7282	-13.6697	-13.8667	-15.2139	-13.2331	-13.1129	-13.891	0.386848	0.455835	0.121526	0.184883
b3608	gpsA	chr	-	3780664,	3781684,	-11.4914	-11.7163	-11.3145	-10.9178	-11.0402	-10.9655	-11.4971	-11.2369	-11.0846	-11.4895	-10.98	-11.3346	0.0351514	0.0740875	0.121874	0.184942
b4044	dinF	chr	+	4255764,	4257144,	-12.8413	-13.2821	-13.0917	-13.9541	-14.0146	-13.3014	-13.1948	-13.4323	-12.9915	-13.083	-13.8261	-13.2415	0.0754763	0.127504	0.121985	0.184942
b1723	pfkB	chr	+	1804393,	1805323,	-14.7064	-15.1855	-14.5705	-14.4395	-14.49	-14.489	-15.9674	-14.9886	-14.9915	-14.7943	-14.4712	-15.3935	0.202245	0.268176	0.122114	0.184942
b2802	fucI	chr	+	2933605,	2935381,	-13.583	-13.9861	-13.8213	-13.4191	-13.76	-14.0151	-14.0929	-14.3757	-13.9915	-13.8085	-13.6682	-14.1711	0.771453	0.804325	0.122034	0.184942
b1627	rsxA	chr	+	1703790,	1704372,	-12.3948	-12.3037	-12.3702	-13.0142	-13.0402	-13.6589	-12.6335	-13.01	-12.155	-12.353	-13.131	-12.6686	0.0505368	0.0954651	0.122789	0.185785
b1068	yceM	chr	+	1126028,	1126952,	-13.21	-13.6924	-13.4108	-12.5801	-13.0661	-12.7763	-13.2486	-13.1935	-12.9915	-13.4444	-12.8163	-13.1884	0.0338357	0.0724851	0.124436	0.18778
b0918	kdsB	chr	+	970074,	970821,	-12.5712	-12.0762	-12.1478	-12.999	-12.5346	-12.8776	-12.0446	-12.1454	-12.7114	-12.2188	-12.7543	-12.1626	0.061235	0.109343	0.124327	0.18778
b3930	menA	chr	-	4117445,	4118372,	-13.3239	-13.6924	-13.4527	-13.8409	-13.5621	-13.9585	-13.3044	-13.6167	-13.551	-13.4952	-13.7312	-13.4445	0.136291	0.198172	0.124467	0.18778
b2477	nlpB	chr	-	2595852,	2596887,	-10.6189	-10.6503	-10.4957	-10.6059	-10.76	-10.489	-10.3925	-10.5408	-10.3395	-10.5795	-10.6475	-10.4355	0.763093	0.797201	0.126097	0.190056
b0786	ybhL	chr	+	819106,	819811,	-12.2284	-12.3554	-12.4386	-12.2742	-12.0793	-11.931	-12.4334	-12.2181	-12.3395	-12.353	-12.1159	-12.3394	0.116722	0.175588	0.128354	0.193086
b0492	ybbN	chr	-	516648,	517503,	-13.3438	-13.2399	-13.4108	-12.2201	-12.8475	-12.2839	-13.745	-13.2688	-12.629	-13.3323	-12.4789	-13.354	0.0407366	0.0818915	0.12881	0.193586
b3778	rep	chr	+	3958699,	3960721,	-12.6809	-12.6549	-12.4812	-12.7233	-12.7286	-12.8776	-12.6455	-12.7186	-12.5135	-12.5902	-12.7543	-12.6506	0.104304	0.160927	0.129353	0.194215
b2340	sixA	chr	-	2454348,	2454834,	-12.6069	-12.3934	-12.4669	-12.379	-12.154	-12.3191	-12.3235	-12.6667	-12.6696	-12.4752	-12.2642	-12.4866	0.0898244	0.143976	0.129849	0.194773
b3835	ubiB	chr	+	4018248,	4019889,	-12.3948	-12.6736	-12.5629	-12.1012	-12.1196	-12.4691	-12.6944	-12.6838	-12.307	-12.5538	-12.174	-12.6268	0.105134	0.161619	0.130814	0.196034
b1180	ycgM	chr	+	1227301,	1227961,	-13.6558	-13.9631	-13.4527	-13.5688	-13.6381	-13.5715	-13.8519	-13.9062	-13.629	-13.6658	-13.5995	-13.8355	0.579156	0.636462	0.13118	0.196394
b2708	gutQ	chr	+	2827834,	2828800,	-13.0219	-13.5653	-13.3177	-12.9249	-13.5437	-13.2666	-13.7975	-14.4323	-13.477	-13.3119	-13.2379	-13.9341	0.82413	0.849071	0.132135	0.197446
b4258	valS	chr	-	4479004,	4481860,	-9.95725	-9.95877	-10.0821	-10.1894	-10.1333	-10.1276	-10.0465	-10.096	-9.90407	-10.0058	-10.1523	-10.0418	0.0492369	0.0938017	0.133079	0.198477
b3865	yihA	chr	-	4048155,	4048788,	-12.3339	-12.2192	-12.3972	-12.302	-12.8031	-12.8261	-12.3527	-11.9676	-12.3726	-12.317	-12.6037	-12.2059	0.188792	0.253993	0.133068	0.198477
b0779	uvrB	chr	+	812748,	814770,	-13.5138	-12.7805	-12.9254	-13.6146	-13.5621	-13.5715	-13.4649	-12.8667	-13.155	-12.9991	-13.5828	-13.1797	0.150293	0.213574	0.134103	0.199739
b2501	ppk	chr	+	2621065,	2623132,	-13.0543	-13.311	-12.9156	-13.3989	-12.8702	-12.9585	-13.5751	-13.2432	-13.551	-13.0787	-13.06	-13.4445	0.933998	0.944604	0.134549	0.200098
b1660	ydhC	chr	+	1737934,	1739146,	-14.2284	-14.8529	-14.059	-15.1765	-14.76	-15.6589	-14.0929	-14.9062	-14.629	-14.3375	-15.0485	-14.4137	0.0825574	0.136093	0.137049	0.203623
b1913	uvrC	chr	-	1990897,	1992730,	-12.3043	-12.3705	-12.4386	-12.1765	-12.2929	-12.5092	-12.4755	-12.6167	-12.551	-12.3793	-12.2877	-12.5355	0.701207	0.744973	0.137774	0.204506
b1916	sdiA	chr	-	1994133,	1994856,	-13.6809	-13.3256	-13.4527	-13.379	-13.2929	-13.1995	-13.771	-13.4614	-13.4066	-13.4611	-13.3047	-13.5977	0.192135	0.258269	0.13908	0.206249
b1292	sapC	chr	-	1351651,	1352542,	-14.2284	-13.9631	-13.5705	-15.1765	-14.2929	-14.1354	-13.9674	-14.0761	-13.2139	-13.852	-14.518	-13.863	0.194161	0.259877	0.139862	0.207016
b0425	panE	chr	-	442827,	443739,	-14.4263	-13.9861	-13.8583	-14.2469	-14.6776	-14.1354	-14.1261	-13.8282	-13.9915	-14.0321	-14.3964	-13.9936	0.33222	0.399889	0.14005	0.2071
b3955	yijP	chr	-	4146554,	4148288,	-13.1044	-12.6366	-12.8963	-13.5688	-13.0926	-13.337	-13.0288	-12.8863	-13.155	-12.8483	-13.2979	-12.9936	0.0783435	0.131355	0.140262	0.207217
b2784	relA	chr	-	2909438,	2911673,	-12.2849	-12.0455	-11.8032	-11.8477	-11.6478	-12.059	-12.2762	-11.9468	-12.1842	-11.9991	-11.7922	-12.1372	0.352059	0.420858	0.141269	0.208508
b1727	yniC	chr	+	1807403,	1808072,	-13.8699	-14.0577	-13.4812	-13.8964	-14.0926	-14.337	-13.7975	-13.5525	-13.9915	-13.7594	-14.06	-13.7306	0.228499	0.295971	0.142254	0.209765
b3613	envC	chr	+	3784860,	3786120,	-12.1562	-11.6366	-11.6453	-12.085	-11.8086	-12.0007	-11.7386	-11.8764	-11.477	-11.7576	-11.941	-11.7433	0.485082	0.548871	0.142978	0.210436
b0568	nfrA	chr	-	587204,	590177,	-13.6311	-13.5653	-14.0376	-14.1765	-14.1196	-14.1995	-13.6697	-13.5215	-14.0984	-13.7525	-14.1554	-13.6686	0.100847	0.156829	0.143332	0.210759
b2733	mutS	chr	+	2855114,	2857676,	-12.364	-12.4809	-12.404	-12.492	-12.5077	-12.6589	-12.4543	-12.1219	-11.7989	-12.4196	-12.5299	-12.2192	0.108955	0.166606	0.143942	0.211457
b4394	yjjX	chr	-	4631255,	4631768,	-14.5138	-14.8959	-14.9552	-13.5027	-14.6776	-13.6589	-14.4649	-14.6167	-15.2139	-14.8085	-13.949	-14.6093	0.137557	0.199457	0.145898	0.21393
b3202	rpoN	chr	+	3342738,	3344172,	-11.8203	-11.8371	-11.8867	-11.414	-11.4509	-11.7641	-12.2304	-11.7363	-11.7545	-11.852	-11.4925	-11.9635	0.106655	0.163426	0.146326	0.214355
b4377	yjjU	chr	+	4610433,	4611507,	-14.5596	-14.9403	-15.3702	-14.3594	-14.0661	-14.074	-15.3824	-15.9062	-14.3395	-14.9749	-14.1678	-15.3155	0.0616114	0.10989	0.146665	0.214652
b1204	pth	chr	-	1257151,	1257736,	-14.1918	-14.159	-13.6822	-14.1094	-13.8031	-14.2666	-13.9674	-13.6167	-13.629	-13.9589	-13.9924	-13.7821	0.831183	0.85409	0.146904	0.2148
b4373	rimI	chr	+	4606207,	4606654,	-14.1918	-14.2124	-13.8213	-14.077	-14.76	-14.8516	-13.9978	-13.5843	-14.3395	-14.0405	-14.4866	-13.8769	0.174549	0.239986	0.147583	0.215593
b1850	eda	chr	-	1930138,	1930780,	-12.1214	-12.3934	-11.9907	-12.0452	-12.5996	-12.216	-12.0288	-11.9572	-11.7989	-12.1539	-12.3013	-11.9673	0.592663	0.648058	0.147774	0.21567
b0381	ddlA	chr	-	399052,	400147,	-12.4477	-12.2261	-12.2182	-12.4191	-12.5714	-12.3922	-12.3429	-12.4037	-12.2443	-12.2769	-12.4789	-12.3491	0.161669	0.227062	0.148847	0.21663
b4059	ssb	chr	+	4272147,	4272684,	-10.4914	-10.4707	-10.4386	-10.3989	-10.3819	-10.4642	-10.5895	-10.4541	-10.477	-10.4632	-10.4037	-10.5232	0.166992	0.232708	0.148627	0.21663
b1528	ydeA	chr	+	1615051,	1616242,	-14.5138	-15.0335	-14.1709	-14.9838	-15.4552	-14.8516	-14.5524	-14.9062	-14.629	-14.5125	-15.1431	-14.6808	0.173242	0.238818	0.148803	0.21663
b1860	ruvB	chr	-	1942369,	1943380,	-13.8413	-13.548	-13.6494	-13.5688	-13.76	-13.6589	-13.8244	-13.9886	-13.7114	-13.6594	-13.6682	-13.863	0.877476	0.896697	0.14996	0.218048
b0886	cydC	chr	-	926696,	928418,	-12.6311	-12.7019	-12.3372	-12.9249	-13.2037	-13.2666	-13.0929	-12.6004	-12.477	-12.5301	-13.1069	-12.8019	0.020056	0.0501602	0.150399	0.218246
b2509	xseA	chr	+	2632253,	2633624,	-13.1918	-12.6184	-12.9652	-14.5688	-14.0146	-13.6146	-13.3824	-13.5525	-13.4066	-12.8855	-14.0951	-13.4445	0.0333913	0.0716313	0.150421	0.218246
b0966	hspQ	chr	-	1027626,	1027944,	-13.3438	-13.8959	-13.6173	-13.229	-13.4381	-13.1671	-13.4026	-13.7542	-14.2139	-13.6275	-13.3047	-13.6209	0.153605	0.217099	0.150514	0.218246
b3912	cpxR	chr	-	4102994,	4103693,	-12.583	-12.333	-12.9254	-12.492	-12.6478	-12.4301	-13.1094	-12.5525	-13.044	-12.6088	-12.546	-12.8769	0.661078	0.710378	0.153048	0.221714
b3629	rfaS	chr	-	3802203,	3803139,	-12.9288	-12.918	-13.0062	-13.2113	-12.8141	-12.8261	-14.1261	-13.9886	-16.7989	-12.955	-12.949	-14.2597	0.997269	0.997269	0.15528	0.224533
b4004	zraR	chr	+	4201342,	4202668,	-14.5138	-13.8743	-14.8032	-13.5027	-13.6381	-13.411	-14.0929	-13.5525	-14.2139	-14.3478	-13.542	-13.891	0.0777489	0.130498	0.155861	0.225124
b1602	pntB	chr	-	1672995,	1674384,	-11.3948	-11.4974	-11.4212	-11.1938	-11.2929	-11.6366	-11.7006	-11.6415	-11.6696	-11.4402	-11.315	-11.6747	0.686572	0.732406	0.155977	0.225124
b1211	prfA	chr	+	1264234,	1265317,	-13.8699	-13.7115	-13.5401	-14.1765	-14.2929	-15.8516	-13.4863	-13.7186	-13.551	-13.6788	-14.4408	-13.5748	0.18371	0.248867	0.156688	0.225942
b3833	ubiE	chr	+	4016877,	4017633,	-12.2376	-12.311	-12.2547	-11.7874	-11.8141	-12.0891	-12.16	-12.1219	-12.0175	-12.2695	-11.8534	-12.1247	0.0549815	0.101534	0.158057	0.22734
b1765	ydjA	chr	-	1846148,	1846700,	-14.0875	-13.7309	-13.8213	-13.6381	-13.6776	-13.6589	-13.7195	-14.5525	-14.629	-13.852	-13.6595	-14.0877	0.172774	0.238593	0.158093	0.22734
b3813	uvrD	chr	+	3996005,	3998168,	-11.2237	-11.1234	-11.145	-11.2113	-11.4988	-11.1751	-11.097	-11.0154	-10.4152	-11.1573	-11.3236	-10.9469	0.328563	0.397193	0.157957	0.22734
b0658	ybeX	chr	-	690128,	691007,	-12.6683	-12.3781	-12.2303	-11.9689	-12.4381	-12.216	-12.5189	-12.5843	-12.3726	-12.3846	-12.2088	-12.5191	0.308546	0.377782	0.158948	0.228152
b2279	nuoK	chr	-	2393064,	2393367,	-12.1387	-11.9803	-12.1826	-12.6862	-13.1893	-12.7521	-12.6575	-12.6167	-12.071	-12.0982	-12.9017	-12.5411	0.0267039	0.0609597	0.159988	0.229224
b1654	grxD	chr	-	1731777,	1732125,	-11.2564	-11.2821	-11.1055	-11.0181	-11.2365	-11.074	-11.3774	-11.537	-11.1407	-11.2035	-11.1219	-11.3935	0.28838	0.356998	0.159904	0.229224
b2097	fbaB	chr	-	2175533,	2176586,	-14.9288	-14.5141	-14.5401	-14.9838	-14.5256	-13.801	-14.7975	-15.0761	-15.7989	-14.6212	-14.4866	-15.0089	0.592976	0.648058	0.160503	0.229751
b4054	tyrB	chr	+	4265136,	4266330,	-14.0543	-14.7704	-13.6822	-13.6381	-13.7182	-14.1354	-14.3429	-13.9468	-14.2139	-14.083	-13.759	-14.1711	0.412878	0.481076	0.161196	0.230532
b1424	mdoD	chr	+	1494879,	1496535,	-13.3239	-13.0949	-13.1364	-13.1259	-12.4466	-12.337	-13.2125	-13.1935	-13.0984	-13.1675	-12.6335	-13.1884	0.147938	0.211186	0.161508	0.230768
b2324	mnmC	chr	+	2439785,	2441792,	-13.1918	-13.7115	-13.6657	-13.7359	-13.5621	-13.6146	-13.3044	-13.5843	-13.044	-13.5419	-13.6335	-13.354	0.568226	0.62709	0.162029	0.231301
b1652	rnt	chr	+	1726370,	1727018,	-13.7064	-14.2124	-14.4247	-14.7108	-14.5996	-14.6589	-14.1948	-14.0761	-14.629	-14.1358	-14.6508	-14.2059	0.122926	0.182813	0.163819	0.232795
b1282	yciH	chr	+	1340681,	1341008,	-14.5138	-14.548	-14.3437	-15.6619	-14.9406	-17.074	-14.5982	-14.5525	-14.477	-14.4555	-15.4408	-14.5634	0.149672	0.212885	0.163646	0.232795
b2552	hmp	chr	+	2683856,	2685047,	-14.0875	-14.0335	-13.8213	-13.5027	-13.3239	-13.0151	-14.1261	-13.6498	-13.4066	-13.9589	-13.3184	-13.822	0.0209922	0.0517699	0.16433	0.233289
b3623	waaU	chr	-	3796261,	3797335,	-13.21	-13.2965	-13.6015	-13.1094	-13.0273	-13.5297	-13.8799	-13.9468	-15.7989	-13.3846	-13.1431	-14.0716	0.496535	0.5578	0.164464	0.233289
b0215	dnaQ	chr	+	236066,	236798,	-13.7589	-13.2124	-13.6332	-13.9838	-13.9406	-13.8516	-13.771	-13.2432	-13.7114	-13.5009	-13.9383	-13.5522	0.135433	0.197291	0.165126	0.234015
b0826	moeB	chr	-	863602,	864352,	-13.7064	-13.8318	-13.6822	-14.1094	-15.0402	-14.411	-14.16	-13.8282	-13.892	-13.7388	-14.518	-13.9936	0.100624	0.156637	0.167754	0.237526
b0417	thiL	chr	+	434857,	435835,	-13.2284	-12.9069	-12.7242	-14.077	-13.9895	-13.1995	-13.1094	-13.4614	-12.9915	-12.9045	-13.8261	-13.2059	0.0835733	0.136706	0.168219	0.237969
b4255	rraB	chr	+	4476495,	4476912,	-12.1828	-12.2056	-11.8772	-11.8823	-12.021	-12.0296	-12.2214	-12.3346	-11.9915	-12.0616	-11.9705	-12.2236	0.41502	0.482138	0.168559	0.23802
b1272	sohB	chr	+	1327355,	1328405,	-12.1739	-12.2893	-12.2609	-12.1594	-12.5807	-12.5504	-12.3725	-12.01	-11.9915	-12.2476	-12.4074	-12.1754	0.296724	0.365019	0.17238	0.242977
b3009	yghB	chr	+	3151584,	3152244,	-13.4052	-13.6736	-14.3702	-13.8964	-13.6978	-14.0151	-13.8244	-13.4911	-13.629	-13.8229	-13.8261	-13.6686	0.873439	0.893407	0.173368	0.243931
b1086	rluC	chr	+	1144162,	1145122,	-12.0625	-12.1921	-12.0862	-12.3989	-12.3477	-12.216	-12.0446	-12.1336	-12.307	-12.1158	-12.3393	-12.1122	0.0418721	0.0836373	0.174958	0.245726
b0123	cueO	chr	+	137082,	138633,	-14.6069	-14.6924	-14.2671	-14.2834	-14.4212	-14.2666	-14.6944	-14.5525	-14.3395	-14.4895	-14.3393	-14.5862	0.262946	0.332611	0.174947	0.245726
b2830	nudH	chr	-	2966468,	2966999,	-12.5251	-12.8959	-12.8032	-12.8006	-12.9286	-12.801	-12.3235	-12.6667	-12.7545	-12.7559	-12.8559	-12.4974	0.464693	0.529628	0.176342	0.247412
b1715	pheM	chr	-	1797249,	1797294,	-14.1214	-14.133	-14.2671	-13.302	-14.3239	-13.3735	-13.9377	-14.3212	-15.2139	-14.1813	-13.6859	-14.2059	0.26208	0.332322	0.176819	0.247672
b2479	gcvR	chr	+	2597927,	2598500,	-12.7064	-13.0215	-13.3702	-12.674	-13.0793	-12.4691	-13.267	-13.0761	-14.477	-13.0531	-12.7922	-13.3155	0.328711	0.397193	0.177119	0.247872
b0907	serC	chr	+	956875,	957964,	-12.7995	-12.0949	-12.404	-12.4708	-12.3718	-12.2496	-12.4543	-12.537	-12.477	-12.374	-12.3819	-12.4866	0.773702	0.805082	0.179614	0.250915
b1704	aroH	chr	+	1786458,	1787505,	-13.9902	-13.9631	-13.6988	-15.0452	-15.1471	-14.489	-14.3429	-14.2181	-14.7989	-13.8594	-14.9597	-14.354	0.0239017	0.056541	0.17984	0.251007
b3572	avtA	chr	+	3737727,	3738981,	-14.0543	-14.2399	-13.6494	-13.5688	-13.6776	-13.7521	-14.1948	-13.6838	-13.9915	-13.9354	-13.6508	-13.9635	0.206162	0.271759	0.18068	0.251954
b3209	elbB	chr	-	3347827,	3348481,	-12.5596	-12.2679	-12.3372	-12.5915	-12.739	-12.3735	-12.4128	-12.4468	-12.1842	-12.3661	-12.6079	-12.3885	0.264393	0.333634	0.181185	0.252433
b0967	yccW	chr	-	1028001,	1029192,	-12.6809	-12.9746	-13.1593	-13.6381	-13.49	-13.489	-12.8519	-13.2181	-13.477	-12.9589	-13.542	-13.0557	0.0377242	0.0773248	0.181489	0.252633
b2303	folX	chr	+	2419346,	2419709,	-14.0219	-13.8959	-13.4669	-12.8964	-13.5807	-13.411	-13.9085	-13.7186	-13.477	-13.7388	-13.2642	-13.769	0.13642	0.198176	0.182481	0.253788
b2436	hemF	chr	+	2551246,	2552146,	-12.4157	-12.9291	-12.7414	-12.8273	-13.0531	-12.5504	-12.682	-12.4911	-12.4066	-12.7085	-12.8609	-12.5691	0.611609	0.665124	0.182997	0.25428
b1618	uidR	chr	-	1694485,	1695076,	-14.7064	-16.0335	-14.5705	-13.7108	-13.9895	-15.1995	-15.2304	-14.8282	-15.477	-14.9749	-14.0371	-15.104	0.286023	0.355203	0.185092	0.256963
b1826	mgrB	chr	-	1906646,	1906790,	-12.6069	-12.409	-12.4247	-12.5464	-12.6876	-12.9041	-12.4543	-12.2817	-12.6696	-12.4639	-12.6726	-12.4188	0.143704	0.206377	0.186129	0.258003
b2783	chpR	chr	-	2909112,	2909361,	-14.6558	-14.3858	-15.1251	-14.5244	-14.3881	-14.7521	-15.0288	-15.1692	-16.7989	-14.7118	-14.5022	-15.2415	0.538214	0.599889	0.186171	0.258003
b3440	yhhX	chr	-	3577790,	3578828,	-15.6069	-15.1855	-14.2922	-14.7108	-14.5621	-14.5715	-14.8519	-14.7542	-14.629	-14.8374	-14.6164	-14.7821	0.397964	0.466476	0.186703	0.258511
b4144	yjeI	chr	+	4370831,	4371185,	-12.7324	-12.6005	-12.7501	-12.5464	-12.3718	-12.1832	-12.4543	-12.7542	-12.551	-12.6919	-12.3928	-12.5691	0.0715632	0.122274	0.187007	0.258704
b2821	ptrA	chr	-	2954017,	2956906,	-12.9439	-12.7115	-13.2303	-12.7359	-13.1893	-12.7763	-12.9825	-13.2181	-13.4066	-12.9589	-12.9278	-13.1205	0.783116	0.812644	0.18887	0.26105
b1291	sapD	chr	-	1350659,	1351652,	-14.3043	-14.5828	-14.4247	-14.8684	-14.49	-15.074	-14.7975	-14.2181	-14.0984	-14.4444	-14.722	-14.4549	0.147607	0.211098	0.189495	0.261684
b1482	osmC	chr	+	1554648,	1555080,	-15.1214	-14.3256	-15.1251	-13.7359	-13.8702	-14.337	-14.745	-14.6167	-13.9915	-14.7943	-13.8965	-14.5634	0.0605956	0.108559	0.191029	0.263106
b3538	bcsG	chr	+	3696236,	3697916,	-14.3845	-14.4485	-14.1027	-14.0452	-13.8475	-14.411	-14.5524	-14.4911	-14.2139	-14.2868	-14.0146	-14.476	0.353133	0.42182	0.191696	0.263792
b1630	rsxD	chr	+	1707165,	1708224,	-13.1739	-12.8008	-13.2182	-13.5688	-14.2037	-13.6146	-13.0288	-12.9264	-13.7989	-13.0489	-13.8261	-13.0796	0.0485436	0.0930468	0.193544	0.265714
b0737	tolQ	chr	+	774375,	775068,	-12.8844	-13.2261	-12.9855	-13.5244	-13.4046	-13.1671	-12.7975	-13.1692	-13.2753	-13.0363	-13.3964	-12.986	0.0844617	0.137349	0.193601	0.265714
b3755	yieP	chr	-	3938657,	3939350,	-13.2284	-13.3705	-13.5552	-13.6146	-14.2929	-13.489	-13.4649	-13.4323	-13.0984	-13.4006	-13.8459	-13.3935	0.233618	0.301776	0.194104	0.266032
b1491	yddW	chr	-	1565527,	1566847,	-14.4263	-14.4485	-14.1709	-14.2834	-14.2037	-14.1995	-14.2304	-14.3212	-14.3395	-14.3272	-14.2314	-14.278	0.309888	0.379129	0.194173	0.266032
b4046	zur	chr	-	4257510,	4258026,	-14.2658	-13.6366	-14.3177	-14.9838	-14.7182	-14.6589	-14.3824	-14.7542	-13.9915	-14.0321	-14.797	-14.4342	0.0646529	0.11376	0.194578	0.266354
b1912	pgsA	chr	-	1990292,	1990841,	-13.247	-13.4485	-13.1027	-13.1594	-13.0146	-13.0151	-13.0446	-13.4614	-13.477	-13.2524	-13.0658	-13.2415	0.169413	0.235405	0.194947	0.266626
b3468	yhhN	chr	+	3603773,	3604400,	-14.3845	-14.1075	-15.0376	-13.5244	-13.8702	-13.6146	-14.3044	-13.7542	-13.892	-14.4895	-13.6859	-14.0243	0.0785452	0.131542	0.196283	0.268219
b0908	aroA	chr	+	958034,	959318,	-13.6809	-13.0949	-13.7675	-13.8139	-13.6381	-13.9041	-13.267	-13.6167	-13.7114	-13.478	-13.7497	-13.4445	0.32924	0.397353	0.196922	0.268624
b1848	yebG	chr	-	1928480,	1928771,	-13.1562	-12.9517	-12.8772	-13.5244	-13.8031	-14.1995	-13.53	-13.4911	-13.4066	-12.9709	-13.759	-13.4974	0.0343388	0.0727666	0.198998	0.271219
b0452	tesB	chr	-	473524,	474385,	-14.3043	-14.0335	-14.1709	-14.0452	-13.8031	-13.5297	-14.0929	-14.1219	-13.9915	-14.1539	-13.8261	-14.0877	0.110173	0.167995	0.199253	0.271331
b1063	yceB	chr	-	1121935,	1122496,	-14.4694	-14.3554	-13.8963	-14.1094	-13.5621	-14.489	-14.5982	-14.4323	-14.629	-14.1813	-13.8965	-14.5411	0.596563	0.651023	0.199922	0.272005
b0004	thrC	chr	+	3733,	5020,	-13.3043	-12.9291	-13.3177	-13.0931	-12.5807	-12.931	-13.1261	-13.01	-13.7114	-13.1675	-12.8163	-13.1541	0.187831	0.252918	0.200801	0.272964
b0947	ycbX	chr	-	1005713,	1006823,	-14.0543	-14.6184	-14.1251	-14.3594	-14.6776	-14.411	-14.4649	-14.0761	-14.2139	-14.2573	-14.5022	-14.278	0.361059	0.429649	0.201202	0.273272
b1664	ydhQ	chr	-	1742894,	1744151,	-13.3845	-13.2965	-13.3702	-13.7874	-12.9406	-13.2666	-13.5982	-13.6498	-14.477	-13.3478	-13.2642	-13.718	0.946277	0.954813	0.201886	0.273964
b4488	ilvG	chr	+	3948582,	3950227,	-10.2873	-10.3648	-10.3274	-10.2742	-10.4087	-10.3236	-10.2509	-10.2655	-9.97234	-10.3297	-10.3419	-10.2114	0.85496	0.876222	0.204444	0.276955
b3359	argD	chr	-	3486981,	3488202,	-14.4694	-14.8111	-14.4527	-14.7108	-14.2625	-15.337	-14.1948	-13.9468	-14.477	-14.5719	-14.5828	-14.1372	0.610098	0.663943	0.205474	0.278109
b0142	folK	chr	-	157252,	157732,	-14.6558	-14.0824	-14.0376	-14.9838	-15.9406	-14.5715	-14.6455	-14.3212	-14.3395	-14.1906	-15.2184	-14.476	0.141153	0.20399	0.208534	0.282007
b0481	ybaK	chr	-	505826,	506306,	-14.2658	-14.3858	-14.6657	-14.9838	-14.6776	-14.0151	-14.4231	-13.7542	-13.892	-14.4555	-14.6164	-14.0716	0.727545	0.766489	0.209138	0.28258
b3625	rfaY	chr	-	3798289,	3798988,	-13.8133	-13.4485	-13.3836	-13.4395	-13.4212	-13.2666	-14.3044	-13.4911	-15.477	-13.5067	-13.3964	-14.0557	0.327994	0.397169	0.209635	0.283007
b3253	yhdH	chr	+	3401505,	3402480,	-13.6558	-13.8743	-13.8397	-13.2469	-13.76	-13.9041	-13.8519	-13.9886	-14.9915	-13.8014	-13.5746	-14.0243	0.530828	0.592922	0.213404	0.287847
b2690	yqaB	chr	-	2814958,	2815525,	-12.6809	-13.0455	-13.1139	-13.1594	-13.4552	-13.801	-13.0132	-13.3212	-13.0984	-12.9669	-13.3964	-13.1288	0.089969	0.144061	0.21378	0.288106
b1128	ycfD	chr	-	1186341,	1187463,	-12.5251	-12.3934	-12.1195	-12.8006	-12.49	-12.3191	-12.2577	-12.3212	-12.2753	-12.3094	-12.5582	-12.2827	0.362093	0.430552	0.214253	0.288496
b0712	ybgK	chr	+	743465,	744398,	-13.8991	-14.0824	-14.3177	-13.8684	-13.9895	-13.801	-14.6455	-13.9886	-14.0984	-14.118	-13.9068	-14.2967	0.213821	0.279503	0.21495	0.289185
b3052	rfaE	chr	-	3193341,	3194775,	-12.2009	-11.8059	-12.0862	-12.077	-12.6478	-12.2327	-12.1687	-11.9993	-11.892	-12.0094	-12.3358	-12.0636	0.244504	0.312952	0.215255	0.289347
b4065	yjcE	chr	+	4278002,	4279652,	-13.2658	-13.5828	-13.9958	-13.1765	-13.2777	-13.1354	-13.5751	-14.2181	-13.2753	-13.6338	-13.212	-13.718	0.182286	0.247581	0.216209	0.29038
b1304	pspA	chr	+	1366102,	1366771,	-12.9439	-13.3256	-13.2303	-13.077	-13.5077	-13.411	-13.0929	-13.2688	-12.7545	-13.1813	-13.3184	-13.0958	0.396132	0.465024	0.217079	0.291299
b1344	ttcA	chr	-	1409036,	1409972,	-12.9902	-12.7906	-12.9059	-13.9249	-13.3881	-13.2327	-13.143	-13.1935	-13.0984	-12.8855	-13.5259	-13.1541	0.0887965	0.143208	0.21793	0.291941
b3434	yhgN	chr	+	3573093,	3573687,	-13.6311	-14.4168	-14.3437	-14.2834	-14.5256	-14.7521	-13.8244	-14.2181	-14.477	-14.1448	-14.4712	-14.0399	0.262521	0.332585	0.217787	0.291941
b1622	malY	chr	+	1698980,	1700153,	-15.6069	-14.5141	-14.1944	-14.2834	-13.8475	-14.2666	-14.1261	-15.0761	-14.629	-14.5719	-14.0716	-14.476	0.270453	0.340185	0.219781	0.294168
b4371	rsmC	chr	-	4604691,	4605723,	-12.4263	-12.8318	-12.5629	-12.6984	-12.8251	-13.1044	-12.8109	-12.6667	-12.307	-12.6119	-12.8261	-12.6747	0.186719	0.251637	0.220115	0.294364
b0387	yaiI	chr	+	404987,	405446,	-14.2658	-14.2965	-14.6015	-14.2834	-14.3881	-13.7521	-14.267	-14.7542	-14.477	-14.4006	-14.2056	-14.4549	0.349265	0.417837	0.220379	0.294465
b0172	frr	chr	+	192871,	193429,	-10.038	-10.0964	-10.1069	-10.3716	-10.1715	-10.1198	-10.0035	-10.1572	-10.0984	-10.0852	-10.2306	-10.0706	0.202802	0.268687	0.221178	0.295282
b2075	mdtB	chr	+	2153286,	2156409,	-14.4263	-14.159	-14.6657	-14.1425	-14.5996	-14.6589	-13.8799	-14.4323	-14.0984	-14.4115	-14.4259	-14.0877	0.830709	0.85409	0.222738	0.297111
b3700	recF	chr	-	3878170,	3879244,	-13.0708	-13.4809	-12.8122	-13.6862	-13.6978	-13.489	-13.6944	-12.9676	-12.9409	-13.083	-13.6508	-13.278	0.110485	0.168144	0.223555	0.297946
b3997	hemE	chr	+	4195738,	4196803,	-13.0543	-12.9631	-12.4885	-13.077	-13.4552	-13.0151	-12.7842	-13.1935	-12.5894	-12.7767	-13.2184	-12.884	0.198374	0.264353	0.224385	0.298798
b4374	yjjG	chr	+	4606668,	4607346,	-13.8133	-13.4809	-13.9156	-15.1765	-13.9895	-14.1354	-13.9377	-13.9062	-13.551	-13.7253	-14.3534	-13.863	0.195244	0.261104	0.225393	0.299886
b3673	emrD	chr	+	3851944,	3853129,	-11.9439	-11.8743	-12.0062	-11.9394	-12.1751	-12.216	-11.8941	-12.0874	-11.5701	-11.9432	-12.0921	-11.9052	0.179422	0.24526	0.227096	0.301895
b2907	ubiH	chr	-	3050361,	3051540,	-12.1562	-12.0335	-11.9652	-12.1594	-12.1264	-11.9447	-11.9303	-12.0649	-11.7989	-12.0363	-12.101	-11.9561	0.78691	0.8153	0.227305	0.301916
b3670	ilvN	chr	-	3848824,	3849115,	-13.6311	-14.0577	-13.8772	-13.9541	-13.6381	-13.6146	-13.8799	-13.9886	-13.892	-13.8668	-13.7404	-13.9196	0.50901	0.570586	0.228396	0.303108
b1048	mdoG	chr	+	1108557,	1110093,	-11.6434	-11.7855	-11.8677	-12.1679	-12.6381	-12.5504	-12.3235	-12.1219	-12.1842	-11.7785	-12.4333	-12.2281	0.0262678	0.0600517	0.229766	0.304668
b3087	ygjR	chr	+	3235332,	3236319,	-14.5596	-15.4168	-14.7675	-13.9541	-13.4381	-14.0151	-14.9674	-14.6167	-13.7114	-14.8969	-13.7129	-14.5862	0.0291049	0.064834	0.230813	0.305798
b3843	ubiD	chr	+	4023010,	4024504,	-11.548	-11.7505	-11.7242	-11.4603	-11.168	-10.8974	-11.6455	-11.6415	-11.1842	-11.6854	-11.2072	-11.5663	0.0765691	0.12887	0.231213	0.306069
b2777	ygcF	chr	-	2902768,	2903440,	-12.5251	-12.5225	-12.3307	-12.7359	-13.0146	-13.6146	-12.5982	-12.6667	-12.7989	-12.4444	-12.9979	-12.6506	0.117682	0.176692	0.23269	0.307763
b1856	yebA	chr	-	1938336,	1939659,	-12.548	-12.9291	-12.3972	-12.2559	-12.3718	-12.3014	-12.4649	-12.9886	-12.4066	-12.6025	-12.315	-12.6209	0.180265	0.245536	0.233045	0.307973
b0899	ycaM	chr	+	946451,	947882,	-15.5138	-15.133	-15.6015	-13.5688	-14.4212	-14.9585	-15.0929	-15.0761	-14.7989	-15.4006	-14.1189	-15.0399	0.0998521	0.155745	0.234396	0.309498
b3839	tatC	chr	+	4020758,	4021535,	-11.6496	-11.6184	-11.6698	-12.0452	-11.7707	-11.6146	-11.6395	-11.6332	-11.5321	-11.6466	-11.831	-11.6209	0.321465	0.390638	0.234931	0.309942
b3786	rffE	chr	+	3968155,	3969286,	-12.4694	-12.409	-12.1083	-12.7233	-12.9406	-12.931	-12.8381	-12.7186	-12.4413	-12.2968	-12.8559	-12.7306	0.0214392	0.0526235	0.23536	0.310247
b4170	mutL	chr	+	4395434,	4397282,	-11.8555	-11.9124	-12.1478	-11.9468	-11.7547	-11.8645	-11.9749	-12.1692	-11.8682	-11.9849	-11.8434	-12.0243	0.341566	0.409565	0.239041	0.314835
b3233	yhcB	chr	+	3378212,	3378611,	-12.006	-11.9235	-12.3049	-11.7296	-11.708	-11.7521	-12.1345	-11.8962	-11.7328	-12.0852	-11.7243	-11.9822	0.0934104	0.147609	0.2417	0.31807
b2515	ispG	chr	-	2638707,	2639826,	-10.8203	-10.9124	-10.923	-10.9322	-11.0531	-10.9585	-10.8729	-10.9572	-10.9285	-10.8921	-10.9896	-10.9106	0.123161	0.182915	0.245014	0.32216
b1712	ihfA	chr	-	1793276,	1793576,	-11.8273	-11.5697	-11.5289	-11.6862	-11.5529	-11.6477	-11.6636	-11.8187	-11.6696	-11.615	-11.6185	-11.718	0.906869	0.92218	0.245499	0.322526
b0394	mak	chr	+	409367,	410276,	-14.7589	-15.0824	-14.5705	-14.077	-14.5996	-14.0151	-14.3429	-14.8282	-16.2139	-14.7802	-14.2709	-14.6808	0.076614	0.12887	0.24588	0.322756
b0419	yajO	chr	-	436384,	437359,	-13.3845	-13.3256	-13.6822	-13.0142	-13.161	-12.8261	-13.0605	-13.1219	-13.4066	-13.4724	-13.0371	-13.1288	0.0350825	0.0740421	0.24614	0.322827
b1835	rsmF	chr	+	1918246,	1919686,	-14.4263	-14.6184	-14.8032	-14.8139	-15.2625	-16.6589	-14.6455	-14.1692	-15.2139	-14.6338	-15.2444	-14.5191	0.222244	0.289065	0.24644	0.32295
b2909	ygfB	chr	-	3052887,	3053466,	-12.2658	-12.3256	-12.6988	-13.229	-12.9527	-12.801	-12.3332	-12.5843	-13.044	-12.4444	-13.0146	-12.5082	0.0380664	0.0778224	0.24829	0.325098
b1143	ymfI	chr	+	1200719,	1201061,	-15.5138	-14.5141	-14.6015	-14.2113	-14.5621	-14.7521	-15.0288	-14.7542	-16.7989	-14.7525	-14.4559	-15.0716	0.379899	0.448659	0.249365	0.325964
b3891	fdhE	chr	-	4078321,	4079251,	-11.5654	-11.5352	-11.5067	-11.9106	-11.7707	-12.1671	-11.7069	-11.7452	-11.8447	-11.5316	-11.8914	-11.7401	0.0676012	0.117365	0.249669	0.32609
b1808	yoaA	chr	-	1889348,	1891259,	-12.5949	-12.7309	-12.4527	-12.9106	-12.9168	-13.0442	-12.8244	-12.9264	-12.477	-12.581	-12.9383	-12.8019	0.0268408	0.061183	0.251201	0.327545
b1539	ydfG	chr	+	1625540,	1626287,	-12.4157	-12.133	-12.4527	-11.9615	-12.086	-12.0442	-12.16	-12.6332	-12.0984	-12.3246	-12.0314	-12.3014	0.0815594	0.13487	0.252368	0.328519
b0219	yafV	chr	-	239418,	240189,	-14.1214	-15.1855	-14.6988	-14.2469	-14.3881	-13.9585	-14.5524	-14.2181	-14.477	-14.6594	-14.2444	-14.4137	0.262713	0.332585	0.252616	0.328569
b2962	yggX	chr	+	3102114,	3102390,	-13.1387	-13.0215	-12.8867	-12.7486	-12.5714	-12.6589	-13.143	-12.6167	-12.9409	-12.9951	-12.6508	-12.9052	0.0199423	0.0501602	0.253038	0.328845
b2697	alaS	chr	-	2817402,	2820033,	-9.66201	-9.65841	-9.74572	-9.62776	-9.73246	-9.61455	-9.68354	-9.70325	-9.85052	-9.69318	-9.67044	-9.71404	0.554212	0.613787	0.253948	0.329753
b3499	yhiR	chr	+	3643407,	3644250,	-14.6558	-14.7309	-14.2922	-15.6619	-14.5996	-14.9585	-14.508	-14.6167	-14.629	-14.5242	-14.9814	-14.5634	0.236833	0.305251	0.256643	0.332774
b2232	ubiG	chr	+	2337588,	2338311,	-13.5365	-13.9403	-13.1709	-13.4395	-13.9649	-13.5297	-13.4231	-13.5525	-12.7545	-13.4952	-13.6682	-13.3443	0.74766	0.785796	0.256699	0.332774
b0659	ybeY	chr	-	691096,	691564,	-13.8133	-13.9403	-13.7852	-13.5027	-13.76	-13.3014	-13.8519	-13.4911	-14.0984	-13.8447	-13.5664	-13.7433	0.12177	0.181611	0.260763	0.336648
b3235	degS	chr	+	3380221,	3381289,	-12.9902	-12.9069	-13.059	-13.5915	-13.0273	-13.4495	-13.3044	-13.0988	-12.7114	-12.987	-13.2911	-13.1288	0.153094	0.216572	0.260559	0.336648
b0051	ksgA	chr	-	51608,	52430,	-12.3845	-12.2893	-12.3307	-12.674	-12.3963	-12.3735	-12.5189	-12.1935	-12.0984	-12.3297	-12.4866	-12.3298	0.265416	0.334655	0.261928	0.337875
b1185	dsbB	chr	-	1231722,	1232253,	-11.8844	-11.8371	-11.9011	-12.0219	-12.1965	-12.1044	-12.0525	-12.0427	-11.7114	-11.8743	-12.1129	-11.9936	0.0310481	0.0678121	0.262882	0.338826
b1294	sapA	chr	-	1353490,	1355134,	-12.8699	-12.918	-13.1027	-13.4191	-13.161	-13.1671	-13.1261	-12.7907	-13.2139	-12.9749	-13.251	-13.0089	0.0633839	0.112157	0.26426	0.340321
b0459	maa	chr	-	478590,	479142,	-13.9902	-13.9403	-14.5705	-13.7359	-14.1471	-13.2666	-14.508	-14.1219	-13.7989	-14.1721	-13.7874	-14.2415	0.241327	0.309262	0.264724	0.340639
b2819	recD	chr	-	2948656,	2950483,	-13.7858	-13.9403	-14.0376	-13.8684	-14.0402	-14.074	-14.0605	-13.6498	-13.4066	-13.9354	-13.9814	-13.7953	0.495282	0.557193	0.266324	0.342417
b1414	ydcF	chr	+	1485258,	1486059,	-13.8413	-15.2399	-14.3437	-14.5244	-14.2037	-14.6589	-14.9085	-14.5525	-16.2139	-14.4223	-14.3964	-14.891	0.978803	0.982568	0.267071	0.343095
b1647	ydhF	chr	-	1722759,	1723656,	-13.6069	-14.1075	-13.6657	-13.5915	-13.0146	-13.6146	-13.6697	-13.5525	-13.892	-13.7873	-13.3115	-13.6566	0.203034	0.268767	0.269813	0.345904
b2186	yejK	chr	-	2280961,	2281969,	-12.6189	-12.5225	-13.1027	-12.9249	-13.4046	-12.8516	-12.5866	-12.8473	-12.9409	-12.7525	-13.101	-12.7242	0.279065	0.348776	0.26992	0.345904
b2798	xni	chr	+	2928986,	2929832,	-13.8991	-13.7704	-14.1709	-13.6381	-13.7182	-14.074	-13.8244	-14.7542	-14.0984	-13.951	-13.7497	-14.1372	0.487232	0.550509	0.271395	0.347509
b1066	rimJ	chr	+	1124784,	1125369,	-14.4263	-14.9861	-14.2425	-13.6862	-13.6776	-13.9041	-13.8799	-14.6838	-13.892	-14.5125	-13.722	-14.1205	0.0587724	0.106156	0.272045	0.348057
b1255	yciC	chr	-	1310943,	1311687,	-12.8844	-12.9291	-13.3702	-13.4395	-13.4046	-13.9041	-13.0605	-13.3212	-13.551	-13.0744	-13.5022	-13.2147	0.0800563	0.133229	0.274768	0.351137
b2707	srlR	chr	+	2827068,	2827842,	-14.5596	-15.0824	-15.2182	-14.7615	-14.3239	-14.411	-14.508	-15.4911	-14.7989	-14.9749	-14.4866	-14.8355	0.143132	0.205948	0.2749	0.351137
b0405	queA	chr	+	424234,	425305,	-12.7858	-12.5566	-12.6988	-13.5027	-13.2476	-12.9865	-13.1094	-13.1454	-12.7114	-12.6691	-13.2776	-13.0557	0.0458535	0.089423	0.276362	0.352717
b3791	rffA	chr	+	3973168,	3974299,	-12.6936	-13.0096	-12.8122	-12.7744	-12.905	-13.5297	-12.5751	-12.9886	-12.5894	-12.8447	-12.9543	-12.7117	0.433348	0.499723	0.277324	0.353656
b0862	artQ	chr	-	900756,	901473,	-14.3043	-13.548	-13.8772	-13.5027	-13.2929	-13.4495	-13.745	-13.9886	-13.3395	-13.8447	-13.3964	-13.7561	0.143778	0.206377	0.279684	0.356375
b0406	tgt	chr	+	425360,	426488,	-10.5336	-10.8266	-10.7371	-11.1012	-10.905	-11.074	-10.845	-10.994	-10.9534	-10.711	-11.0062	-10.9124	0.0422794	0.0840222	0.280382	0.356975
b3966	btuB	chr	+	4161661,	4163506,	-11.7193	-11.9803	-11.7632	-11.999	-11.776	-12.0296	-11.7842	-11.6415	-11.9409	-11.8229	-11.9017	-11.7529	0.372555	0.441317	0.283085	0.360122
b0111	ampE	chr	+	119280,	120135,	-15.1918	-14.7309	-14.5401	-14.5688	-14.3557	-13.801	-14.2304	-14.6838	-14.9915	-14.7525	-14.2979	-14.476	0.127393	0.187857	0.283962	0.360946
b2891	prfB	chr	-	3033205,	3034304,	-11.5949	-11.2469	-11.2333	-11.7171	-11.9588	-12.0151	-11.4702	-11.7098	-11.9162	-11.3234	-11.876	-11.6122	0.0252234	0.058633	0.284812	0.361732
b0148	hrpB	chr	+	162104,	164534,	-12.9746	-12.8423	-12.7328	-13.1594	-13.0531	-12.8776	-12.9825	-12.9062	-12.8447	-12.8301	-13.0542	-12.9341	0.172134	0.238286	0.286934	0.36326
b4129	lysU	chr	-	4351222,	4352740,	-11.1301	-11.0185	-10.7719	-10.8718	-10.6952	-10.7401	-10.8589	-10.7953	-11.2139	-10.9422	-10.766	-10.8822	0.184196	0.249047	0.286601	0.36326
b4235	pmbA	chr	+	4455981,	4457334,	-13.2658	-12.5653	-12.9753	-12.379	-12.5346	-12.7763	-12.8799	-12.7011	-12.629	-12.8818	-12.518	-12.7755	0.204723	0.270545	0.286765	0.36326
b4390	nadR	chr	+	4625337,	4626570,	-13.4477	-13.9631	-14.3177	-13.4603	-13.5437	-13.6146	-13.8799	-14.8282	-13.551	-13.9276	-13.5259	-14.0877	0.279043	0.348776	0.288715	0.365209
b3789	rffH	chr	+	3971630,	3972512,	-13.1387	-13.133	-13.3569	-13.3594	-13.76	-13.489	-13.4649	-13.4323	-12.9409	-13.2188	-13.5501	-13.3638	0.0913892	0.145887	0.289152	0.365466
b2249	yfaY	chr	-	2360452,	2361655,	-14.3438	-14.4168	-13.9958	-13.34	-13.739	-14.489	-14.745	-13.9886	-14.3395	-14.2188	-13.6859	-14.3736	0.364173	0.432698	0.28992	0.366141
b2685	emrA	chr	+	2809448,	2810621,	-13.3043	-13.1722	-13.4527	-14.3209	-13.6187	-13.7521	-13.6944	-13.7907	-12.9915	-13.3119	-13.8659	-13.5977	0.0981708	0.153889	0.290214	0.366217
b2785	rumA	chr	-	2911720,	2913022,	-12.6809	-12.8318	-12.9753	-12.603	-12.3963	-12.7048	-12.5751	-12.7363	-13.2139	-12.8447	-12.5259	-12.7117	0.10377	0.160261	0.291679	0.367769
b4179	rnr	chr	+	4404676,	4407118,	-12.4052	-12.1075	-12.1885	-11.9689	-12.0596	-12.2327	-12.3044	-12.3757	-12.044	-12.2117	-12.0571	-12.2873	0.282478	0.351918	0.295531	0.372326
b3195	yrbF	chr	-	3337277,	3338087,	-11.7324	-11.8529	-11.8122	-11.9178	-12.0793	-12.1512	-11.845	-12.0988	-11.6696	-11.805	-12.0314	-11.9017	0.0487196	0.0931822	0.296305	0.372702
b4483	tatD	chr	+	4021576,	4022359,	-14.5596	-14.0096	-14.6988	-14.6619	-14.2929	-14.9585	-14.0288	-14.3212	-14.629	-14.3899	-14.5339	-14.2059	0.492963	0.555381	0.29617	0.372702
b0962	helD	chr	+	1023693,	1025748,	-12.8555	-12.7505	-12.9958	-13.0452	-13.2328	-13.3735	-13.0288	-13.1935	-12.3395	-12.8705	-13.1866	-12.9561	0.0463049	0.089967	0.298222	0.37455
b1252	tonB	chr	+	1309112,	1309832,	-14.9288	-15.1855	-14.3177	-14.0452	-14.5996	-15.1995	-14.6455	-15.0761	-16.2139	-14.7253	-14.4559	-14.9487	0.66746	0.715429	0.298253	0.37455
b4207	fklB	chr	+	4426957,	4427578,	-12.5251	-12.1011	-12.1944	-12.1094	-12.3006	-12.5715	-12.2856	-12.0537	-12.071	-12.2379	-12.2742	-12.1668	0.787186	0.8153	0.299458	0.375762
b4492	ydbA	chr	+	1463415,	1472037,	-12.583	-12.5225	-12.2062	-12.1765	-12.1128	-12.7048	-12.4026	-12.537	-12.9409	-12.4033	-12.2346	-12.5191	0.661387	0.710378	0.300175	0.376059
b1688	ydiK	chr	+	1767097,	1768210,	-12.6434	-13.2261	-12.6094	-12.6984	-12.6676	-12.8516	-12.9085	-12.7011	-13.155	-12.805	-12.7129	-12.863	0.711159	0.751975	0.30015	0.376059
b2295	yfbV	chr	-	2410698,	2411154,	-14.0543	-14.2965	-14.0376	-14.2834	-13.9649	-14.8516	-13.9674	-14.1692	-13.892	-14.1269	-14.2184	-14.0243	0.46207	0.527791	0.300861	0.376617
b0474	adk	chr	+	496398,	497043,	-10.8808	-10.7505	-10.9156	-11.2424	-10.8617	-10.9041	-10.7908	-10.7907	-10.9285	-10.8474	-10.9979	-10.8102	0.332961	0.400474	0.301559	0.376888
b2601	aroF	chr	-	2738101,	2739172,	-14.4263	-14.5828	-14.5401	-14.0452	-14.0926	-14.7521	-14.3044	-14.7542	-16.2139	-14.5242	-14.1803	-14.6327	0.438217	0.504223	0.302025	0.377171
b1378	ydbK	chr	-	1435283,	1438808,	-12.165	-12.2469	-12.3569	-12.3114	-12.4466	-12.7048	-12.3235	-12.3896	-12.2753	-12.2671	-12.4408	-12.3394	0.1724	0.238286	0.302478	0.377434
b0924	mukB	chr	+	975548,	980009,	-9.93256	-9.9474	-10.0698	-9.97448	-10.1505	-10.0079	-9.95804	-10.0427	-9.87408	-9.99049	-10.0564	-9.97473	0.430357	0.496638	0.302732	0.37745
b0237	pepD	chr	-	254258,	255716,	-11.548	-11.4933	-11.4994	-11.5244	-11.4254	-11.7048	-11.4755	-11.3688	-11.477	-11.5096	-11.5121	-11.4367	0.690694	0.736302	0.309057	0.385031
b3737	atpE	chr	-	3918972,	3919212,	-9.69358	-9.66189	-9.70303	-9.89815	-9.81408	-9.65052	-9.7053	-9.69457	-9.66961	-9.68619	-9.81026	-9.69617	0.296564	0.365019	0.310181	0.386124
b4232	fbp	chr	-	4452633,	4453632,	-12.5138	-12.8743	-12.3702	-12.379	-12.1196	-12.0891	-12.1773	-12.3482	-12.6696	-12.5659	-12.2024	-12.3014	0.104631	0.161114	0.312894	0.389191
b0102	yacF	chr	-	111855,	112599,	-13.4477	-13.2821	-13.4527	-14.3209	-13.6776	-14.0151	-13.771	-13.7907	-13.7114	-13.3899	-13.949	-13.769	0.0709251	0.121652	0.314747	0.391185
b0407	yajC	chr	+	426510,	426843,	-10.3948	-10.5653	-10.4456	-10.3691	-10.3677	-10.3689	-10.4001	-10.3584	-10.4326	-10.4724	-10.3685	-10.3898	0.186461	0.251637	0.316235	0.392666
b0840	deoR	chr	-	881198,	881957,	-13.364	-13.1459	-13.1027	-13.1765	-13.3557	-13.7048	-13.16	-13.4323	-12.892	-13.1813	-13.3463	-13.2059	0.319466	0.389023	0.317721	0.393633
b3258	panF	chr	+	3405628,	3407080,	-13.8133	-14.3256	-13.7501	-14.7615	-14.49	-14.489	-13.745	-13.9062	-14.7989	-13.9432	-14.5828	-13.9196	0.057885	0.105342	0.318757	0.394068
b0800	ybiB	chr	+	834470,	835433,	-13.8991	-14.0824	-14.059	-13.9838	-13.6978	-13.0151	-13.5751	-14.1219	-14.2139	-14.0238	-13.6249	-13.8355	0.25702	0.326699	0.318828	0.394068
b0641	rlpB	chr	-	670827,	671409,	-11.7589	-11.6139	-11.7285	-11.7296	-11.8251	-11.411	-11.6882	-11.7723	-12.2139	-11.6952	-11.7016	-11.7854	0.760272	0.794784	0.318471	0.394068
b1325	ycjG	chr	+	1386953,	1387919,	-14.7064	-14.6924	-14.7328	-13.4813	-13.8475	-14.6589	-14.6455	-14.4911	-14.2139	-14.7118	-13.8163	-14.5191	0.176242	0.241889	0.322049	0.397124
b0754	aroG	chr	+	784855,	785908,	-13.8699	-13.8959	-14.5705	-13.4191	-13.6978	-14.0151	-14.0288	-13.7907	-13.9915	-14.118	-13.6421	-13.9341	0.239301	0.306917	0.321696	0.397124
b4136	dipZ	chr	-	4361367,	4363065,	-13.8991	-13.6005	-13.2671	-13.2834	-13.7182	-13.1995	-13.53	-13.5215	-13.7989	-13.5242	-13.4408	-13.5634	0.482228	0.546036	0.322061	0.397124
b3805	hemC	chr	-	3987847,	3988789,	-12.364	-12.4646	-12.2242	-12.1259	-11.8086	-11.8516	-12.1773	-12.2817	-11.8682	-12.34	-11.9251	-12.1626	0.0302597	0.0663679	0.322877	0.397817
b4324	uxuR	chr	+	4552598,	4553372,	-13.4477	-13.2538	-14.0376	-13.302	-13.2476	-13.2666	-13.2856	-13.2948	-13.477	-13.5719	-13.2709	-13.3155	0.321616	0.390638	0.325422	0.400637
b0851	nfsA	chr	+	890406,	891129,	-13.4914	-13.6924	-13.6173	-13.8409	-13.5621	-13.489	-13.3235	-13.7186	-13.2139	-13.6088	-13.6421	-13.4342	0.819682	0.845044	0.327156	0.402455
b3742	mioC	chr	-	3924034,	3924478,	-11.5712	-11.3442	-11.8032	-12.2927	-12.1965	-12.2327	-12.314	-12.0317	-11.966	-11.5704	-12.2379	-12.1541	0.0325274	0.0702591	0.327916	0.403074
b3386	rpe	chr	-	3512403,	3513081,	-12.9439	-13.311	-13.4247	-13.3594	-14.3881	-13.1354	-13.0446	-13.1454	-13.2139	-13.2476	-13.6682	-13.104	0.413299	0.481209	0.329028	0.403491
b0571	cusR	chr	-	593982,	594666,	-14.7064	-15.1855	-14.4247	-14.7108	-14.8031	-13.8516	-14.8519	-14.6838	-14.9915	-14.7253	-14.5339	-14.8086	0.450247	0.515791	0.328984	0.403491
b0441	ppiD	chr	+	461138,	463010,	-10.5422	-10.3498	-10.3736	-10.4241	-10.6043	-10.4205	-10.3875	-10.4987	-10.2366	-10.4067	-10.5003	-10.4023	0.514997	0.576473	0.328662	0.403491
b0356	frmA	chr	-	377685,	378795,	-12.6434	-12.5916	-12.8677	-12.8409	-13.106	-12.9585	-12.5524	-13.1219	-12.071	-12.7085	-12.9759	-12.6386	0.0799245	0.133229	0.330167	0.404255
b4156	yjeM	chr	+	4381861,	4383364,	-13.9592	-13.7906	-14.2922	-13.8139	-13.49	-13.5715	-13.5524	-13.8667	-14.3395	-14.0155	-13.6164	-13.7561	0.102892	0.159376	0.330007	0.404255
b4393	trpR	chr	+	4630782,	4631109,	-14.7589	-14.2679	-13.6657	-14.2113	-14.0926	-14.2666	-14.7975	-14.2688	-14.2139	-14.0917	-14.1678	-14.4974	0.910092	0.923658	0.330848	0.404771
b4381	deoC	chr	+	4615345,	4616125,	-13.5365	-13.8318	-13.4527	-13.2113	-13.3083	-13.074	-13.4649	-13.7186	-13.0984	-13.5964	-13.2249	-13.4866	0.0494815	0.0941532	0.331843	0.405477
b0422	xseB	chr	-	440324,	440567,	-13.9288	-13.9403	-13.8963	-13.1425	-13.3239	-13.7521	-13.6697	-13.5215	-13.7114	-13.9198	-13.3254	-13.6209	0.103223	0.15973	0.334259	0.407672
b0092	ddlB	chr	+	102232,	103153,	-11.9439	-12.1011	-11.6863	-11.8684	-11.7338	-11.9865	-11.9599	-11.9886	-11.9162	-11.8855	-11.8286	-11.9635	0.756683	0.79209	0.334239	0.407672
b2290	yfbQ	chr	+	2405582,	2406800,	-14.0543	-14.7309	-14.2182	-14.6146	-14.5621	-13.6589	-14.8519	-14.3757	-14.7989	-14.3272	-14.3534	-14.6566	0.888607	0.905962	0.335853	0.409296
b3633	waaA	chr	+	3806562,	3807840,	-12.21	-12.4168	-12.3904	-12.4499	-12.6187	-12.7521	-12.186	-12.3079	-12.7114	-12.3504	-12.5787	-12.2967	0.0750611	0.126939	0.337479	0.410701
b3128	garD	chr	+	3273303,	3274875,	-15.6069	-14.4809	-15.8032	-14.4813	-14.1471	-13.8516	-14.4649	-14.8282	-14.0984	-15.163	-14.1929	-14.5191	0.0933951	0.147609	0.33753	0.410701
b0307	ykgF	chr	+	321561,	322989,	-14.8133	-14.9403	-14.3972	-15.1765	-14.5621	-14.8516	-14.6944	-14.3757	-14.7989	-14.6723	-14.8163	-14.5862	0.577398	0.634976	0.338584	0.411663
b4053	alr	chr	+	4263804,	4264884,	-12.5251	-12.8851	-12.7157	-12.7233	-12.8251	-12.801	-12.5751	-12.8282	-12.6696	-12.7185	-12.7826	-12.6747	0.553515	0.61345	0.34167	0.415094
b0028	fkpB	chr	+	25825,	26275,	-13.4052	-13.8743	-13.6822	-14.3209	-14.1751	-13.9585	-13.9978	-14.1692	-13.2753	-13.6658	-14.1803	-13.9196	0.0478962	0.0922925	0.345647	0.419274
b3125	garR	chr	-	3269888,	3270773,	-13.0543	-13.2538	-13.7157	-13.8139	-13.9649	-14.2666	-13.143	-14.1692	-13.629	-13.3582	-13.9597	-13.5082	0.0540987	0.100259	0.345569	0.419274
b3055	htrG	chr	+	3199228,	3199849,	-14.1562	-14.8529	-14.3177	-13.9838	-13.7814	-14.2666	-14.0929	-14.0761	-14.477	-14.4333	-13.9383	-14.1372	0.17384	0.239221	0.347123	0.420739
b1209	lolB	chr	-	1262099,	1262723,	-14.8133	-14.2124	-14.5705	-14.9838	-15.1471	-15.074	-14.9085	-15.0761	-13.9915	-14.4895	-15.0716	-14.7821	0.0826852	0.136157	0.34799	0.421463
b4261	yjgP	chr	+	4484240,	4485341,	-12.4052	-12.4012	-12.1944	-12.34	-12.4812	-12.1995	-12.0685	-12.4037	-12.1265	-12.317	-12.3712	-12.1884	0.953604	0.960968	0.3483	0.421513
b3281	aroE	chr	-	3428041,	3428860,	-13.9592	-13.7309	-13.5104	-13.5244	-13.4725	-13.801	-13.7975	-13.6167	-15.2139	-13.6919	-13.5501	-13.863	0.463678	0.529242	0.35012	0.423388
b1804	rnd	chr	-	1884887,	1886015,	-13.4914	-13.1202	-13.0166	-13.6619	-13.49	-13.8516	-13.143	-13.6838	-13.551	-13.163	-13.6164	-13.3736	0.0675241	0.117365	0.351044	0.424178
b0890	ftsK	chr	+	932446,	936436,	-9.79608	-9.72117	-9.72956	-9.81058	-9.8574	-9.91748	-9.86937	-9.81167	-9.55572	-9.7435	-9.85149	-9.79858	0.0479143	0.0922925	0.352076	0.425098
b4001	yjaH	chr	+	4198588,	4199284,	-14.1214	-14.2965	-13.5104	-13.4191	-13.6978	-13.337	-13.6455	-13.6498	-13.551	-13.8969	-13.518	-13.6327	0.163826	0.229664	0.3541	0.426883
b2828	lgt	chr	-	2963183,	2964059,	-12.7456	-12.333	-12.6739	-13.1938	-13.3083	-13.1354	-13.2125	-13.0537	-13.155	-12.5629	-13.2314	-13.1456	0.0259597	0.0596083	0.354475	0.427006
b3338	chiA	chr	-	3465181,	3467875,	-14.8133	-14.0335	-14.1251	-14.1765	-14.2625	-14.1354	-14.4231	-15.0761	-14.0984	-14.2379	-14.2056	-14.5634	0.645721	0.696418	0.357079	0.429812
b0083	ftsL	chr	+	91031,	91397,	-11.2658	-11.4207	-11.2394	-11.519	-11.168	-11.0223	-11.5245	-11.2752	-11.4413	-11.3069	-11.2543	-11.4188	0.683135	0.729734	0.362118	0.435543
b3196	yrbG	chr	+	3338296,	3339274,	-12.4369	-12.4727	-12.3972	-12.4603	-12.3963	-12.6146	-12.2856	-12.5843	-12.071	-12.4333	-12.4597	-12.3491	0.493446	0.555526	0.362782	0.436007
b3610	grxC	chr	-	3782213,	3782465,	-12.5949	-12.8214	-12.7157	-12.7615	-13.0273	-13.2666	-13.0446	-12.7363	-12.7114	-12.7185	-12.9651	-12.8769	0.157376	0.221628	0.363141	0.436103
b0610	rnk	chr	-	642779,	643190,	-13.5138	-14.5141	-14.1478	-13.8964	-13.739	-13.5715	-14.4231	-13.4614	-14.477	-14.0573	-13.759	-14.0089	0.386654	0.455835	0.364397	0.436941
b2516	yfgA	chr	-	2639852,	2640866,	-12.1918	-12.2965	-12.2122	-12.2927	-12.3318	-12.5929	-12.2577	-12.4614	-11.892	-12.2355	-12.364	-12.2642	0.201715	0.2677	0.364959	0.437275
b1118	lolE	chr	+	1176542,	1177787,	-12.165	-12.4646	-12.2796	-11.8409	-12.1128	-12.1832	-12.186	-12.01	-12.4413	-12.3094	-12.0202	-12.1541	0.133636	0.195036	0.365675	0.437469
b0739	tolA	chr	+	775564,	776830,	-11.9363	-12.3479	-12.001	-12.4089	-12.1196	-12.059	-12.1948	-12.1103	-11.7328	-12.0939	-12.2056	-12.0877	0.580188	0.636703	0.36635	0.437942
b0090	murG	chr	+	99643,	100711,	-12.7858	-12.3404	-12.503	-12.4499	-12.5256	-12.931	-12.2125	-12.2306	-12.7545	-12.5096	-12.5664	-12.2873	0.665667	0.714485	0.367924	0.439488
b3713	yieF	chr	+	3892674,	3893241,	-13.9592	-14.3256	-14.4247	-13.7615	-13.5256	-13.7521	-14.3824	-13.7186	-13.7114	-14.2573	-13.6508	-14.0089	0.0389848	0.079286	0.368672	0.440046
b4243	yjgF	chr	-	4468549,	4468936,	-11.5251	-11.2715	-11.3569	-11.8206	-11.5032	-11.931	-11.745	-11.2817	-11.6491	-11.3674	-11.6904	-11.5494	0.0840186	0.137068	0.369315	0.440477
b1084	rne	chr	-	1140404,	1143590,	-10.0854	-10.1459	-10.2288	-10.1425	-10.2328	-10.059	-10.267	-10.3757	-10.0915	-10.1618	-10.1647	-10.2769	0.901878	0.9177	0.371625	0.442896
b2315	folC	chr	-	2429695,	2430964,	-12.2191	-12.1266	-12.0062	-12.302	-12.3963	-12.0007	-12.2486	-11.9162	-12.071	-12.1004	-12.2776	-12.0958	0.45219	0.517638	0.372705	0.443844
b2530	iscS	chr	-	2658338,	2659553,	-11.2946	-11.2893	-11.5743	-11.8206	-11.8532	-11.7048	-11.7515	-11.7186	-11.7545	-11.3966	-11.8115	-11.7401	0.0324547	0.0702513	0.373034	0.443865
b0433	ampG	chr	-	451293,	452769,	-11.9902	-11.8371	-11.9652	-12.265	-12.6577	-12.7048	-12.4543	-12.2432	-12.4413	-11.9256	-12.5101	-12.3736	0.0370041	0.0764396	0.373374	0.443865
b1343	dbpA	chr	+	1407534,	1408908,	-14.0219	-13.4325	-14.2425	-14.4813	-14.76	-14.489	-13.6944	-14.4323	-14.629	-13.8594	-14.5995	-14.0399	0.0928622	0.147487	0.373572	0.443865
b1473	yddG	chr	-	1544311,	1545193,	-16.1918	-14.8111	-14.1027	-14.3594	-14.8933	-14.5715	-14.6944	-14.6167	-15.477	-14.6854	-14.6164	-14.7561	0.562225	0.620906	0.380116	0.451298
b2470	acrD	chr	+	2585616,	2588730,	-14.5138	-13.8111	-14.6015	-14.6146	-14.4212	-14.0151	-14.0929	-14.2688	-14.0984	-14.2573	-14.3964	-14.1541	0.899371	0.915744	0.3834	0.454852
b3249	mreD	chr	-	3396408,	3396897,	-12.8413	-12.9746	-12.9156	-13.0296	-13.7182	-13.0442	-13.2856	-12.8093	-12.892	-12.916	-13.2979	-13.0399	0.258063	0.327493	0.385928	0.457504
b0048	folA	chr	+	49822,	50302,	-12.6069	-12.8214	-12.9254	-13.379	-13.0273	-12.931	-12.6944	-13.01	-13.0984	-12.8014	-13.1249	-12.8561	0.127273	0.187857	0.386496	0.457832
b2959	yggL	chr	-	3099828,	3100155,	-12.5712	-12.8423	-12.5401	-13.379	-12.8031	-12.6589	-12.5637	-12.5843	-12.9409	-12.6466	-12.9543	-12.6209	0.313115	0.382778	0.389879	0.461489
b3794	rffM	chr	+	3977978,	3978719,	-13.8133	-13.918	-14.0807	-14.2834	-13.9649	-14.8516	-14.3429	-14.2181	-13.4066	-13.951	-14.2184	-14.1205	0.234861	0.302959	0.390598	0.461757
b2418	pdxK	chr	-	2534407,	2535259,	-14.0219	-14.133	-13.8772	-14.3209	-14.4552	-13.6589	-13.7975	-14.2688	-13.2753	-13.9991	-14.2184	-13.8492	0.646233	0.696491	0.390695	0.461757
b3031	yqiA	chr	-	3173446,	3174028,	-12.3742	-12.4974	-12.474	-12.4499	-12.8031	-12.0442	-12.6455	-12.5683	-12.7989	-12.4555	-12.4983	-12.6386	0.948422	0.956361	0.392622	0.463685
b3999	yjaG	chr	+	4197526,	4198117,	-13.5596	-13.7309	-13.4527	-13.8409	-14.0146	-13.9585	-13.7195	-14.0317	-13.7114	-13.5719	-13.9383	-13.822	0.0274873	0.0622039	0.393754	0.464672
b1525	yneI	chr	-	1611338,	1612727,	-14.3845	-14.1855	-14.8032	-14.8139	-14.7182	-14.9585	-14.9085	-14.6838	-14.477	-14.4555	-14.797	-14.7561	0.166974	0.232708	0.394952	0.465734
b2822	recC	chr	-	2957081,	2960450,	-13.3043	-13.6184	-13.5252	-12.8964	-13.0402	-13.337	-13.4231	-13.5843	-12.9409	-13.4952	-13.0371	-13.3935	0.0768448	0.129119	0.395907	0.466502
b4263	yjgR	chr	-	4486583,	4488086,	-15.1918	-14.3858	-14.7675	-14.7615	-14.4552	-14.489	-14.5524	-15.2688	-14.629	-14.7118	-14.5664	-14.7821	0.466881	0.530962	0.396199	0.466502
b2688	gshA	chr	-	2812904,	2814461,	-11.6129	-11.8796	-11.8443	-11.5299	-11.7182	-11.6146	-11.9157	-11.7452	-11.551	-11.7925	-11.627	-11.7953	0.199907	0.265592	0.398828	0.469244
b3011	yqhD	chr	+	3153376,	3154540,	-13.8413	-13.8318	-13.8583	-14.1094	-13.9649	-13.9041	-13.9978	-13.9468	-12.9915	-13.8447	-14.0034	-13.7821	0.132094	0.193147	0.400116	0.470407
b3164	pnp	chr	-	3307054,	3309190,	-9.41705	-9.43255	-9.55809	-9.64103	-9.61869	-9.58748	-9.59236	-9.62903	-9.39375	-9.47663	-9.62065	-9.57406	0.0686773	0.11897	0.401524	0.471355
b0085	murE	chr	+	93165,	94653,	-10.6311	-10.6027	-10.5477	-10.8614	-10.7338	-10.62	-10.6011	-10.814	-10.398	-10.5879	-10.7555	-10.6401	0.164079	0.229664	0.401376	0.471355
b0631	ybeD	chr	-	661601,	661865,	-13.1562	-13.531	-13.6822	-13.4191	-13.6381	-13.0442	-13.8244	-13.0761	-14.629	-13.478	-13.4259	-13.5862	0.721667	0.762057	0.405467	0.475626
b0026	ileS	chr	+	22390,	25207,	-10.0219	-10.0052	-10.1944	-10.079	-10.0052	-9.96546	-10.1882	-10.0208	-10.0241	-10.0814	-10.0237	-10.102	0.465373	0.530018	0.40724	0.476992
b3738	atpB	chr	-	3919258,	3920074,	-9.03196	-9.06229	-8.99646	-9.27994	-9.26537	-9.13539	-9.22706	-9.14095	-9.16226	-9.0282	-9.24443	-9.18624	0.0357237	0.0748906	0.408782	0.478083
b1613	manA	chr	+	1686599,	1687775,	-13.21	-13.5141	-13.1139	-13.3209	-13.7814	-13.411	-13.3044	-13.5215	-13.2139	-13.2671	-13.5259	-13.3638	0.293083	0.361393	0.408638	0.478083
b1098	tmk	chr	+	1154346,	1154988,	-13.8413	-13.6366	-14.2671	-13.6862	-13.9649	-14.1995	-13.5982	-13.8667	-13.892	-13.9121	-13.8965	-13.7306	0.889844	0.906634	0.410724	0.479996
b0281	intF	chr	-	294919,	296320,	-14.7589	-15.6924	-14.5705	-14.1094	-14.5621	-14.337	-14.3824	-14.3212	-15.477	-14.9276	-14.3393	-14.476	0.183618	0.248867	0.411719	0.4808
b3042	yqiC	chr	+	3182861,	3183152,	-13.9592	-14.5828	-13.9353	-15.4813	-14.1471	-14.5715	-14.4649	-14.0317	-14.477	-14.1358	-14.5995	-14.2967	0.287299	0.356224	0.413604	0.482641
b1591	dmsD	chr	+	1662529,	1663144,	-15.1918	-14.7704	-14.7328	-14.7108	-14.5621	-14.1995	-14.3044	-14.9062	-14.9915	-14.852	-14.5339	-14.5862	0.126271	0.186901	0.414896	0.483068
b2743	pcm	chr	-	2866914,	2867541,	-12.6434	-13.0949	-12.8122	-12.8273	-13.2777	-12.9041	-12.9674	-12.8093	-12.7989	-12.8557	-13.0258	-12.884	0.469667	0.533356	0.414607	0.483068
b3200	lptA	chr	+	3341401,	3341959,	-12.7456	-12.7906	-12.9156	-12.6619	-12.9527	-12.7282	-13.0605	-12.6332	-13.155	-12.8265	-12.797	-12.9052	0.742994	0.781416	0.422872	0.491989
b0355	frmB	chr	-	376758,	377592,	-14.3845	-14.1075	-13.5401	-15.0452	-14.2328	-15.074	-14.745	-14.0317	-14.629	-13.9121	-14.6335	-14.4342	0.106364	0.16314	0.424686	0.493414
b3198	kdsC	chr	+	3340294,	3340861,	-13.6558	-13.1855	-13.6657	-13.7615	-13.3083	-13.489	-13.6216	-13.1454	-13.2753	-13.478	-13.4944	-13.3835	0.937214	0.946889	0.424726	0.493414
b3600	mtlD	chr	+	3772446,	3773595,	-13.038	-13.2679	-13.3049	-12.9394	-12.9771	-13.2327	-13.3625	-13.2688	-12.9409	-13.2188	-13.009	-13.2597	0.284107	0.353403	0.426143	0.494692
b1004	wrbA	chr	-	1066334,	1066931,	-14.5138	-14.7309	-15.7328	-13.9838	-14.4552	-14.074	-15.2304	-14.5525	-13.892	-14.9749	-14.1929	-14.7055	0.148489	0.211587	0.427957	0.49643
b0444	queC	chr	-	464075,	464771,	-13.3043	-13.4809	-13.4247	-13.3594	-13.1751	-13.2666	-13.3044	-13.2688	-13.4066	-13.4115	-13.2576	-13.3061	0.141204	0.20399	0.429239	0.497549
b1609	rstB	chr	+	1680905,	1682207,	-13.5596	-13.1075	-12.9958	-13.1259	-12.8363	-13.0151	-13.2125	-12.9264	-13.155	-13.163	-12.9705	-13.0958	0.32179	0.390638	0.433923	0.502235
b3424	glpG	chr	-	3558644,	3559475,	-12.583	-12.6642	-12.4669	-12.5915	-12.5256	-12.801	-12.6455	-12.6332	-12.1265	-12.5629	-12.5995	-12.5522	0.541555	0.602648	0.436854	0.505254
b3096	yqjB	chr	+	3246460,	3246844,	-13.8413	-13.5828	-13.6173	-14.4395	-13.8031	-13.9585	-13.745	-14.0761	-13.7989	-13.6594	-14.0371	-13.863	0.170435	0.236405	0.437191	0.50527
b3156	yhbS	chr	-	3298276,	3298780,	-13.6809	-13.4809	-14.059	-12.9394	-12.8588	-12.9041	-12.9085	-13.0537	-12.892	-13.7388	-12.8965	-12.9561	0.0362922	0.0754761	0.440146	0.508311
b2394	insL	chr	+	2512352,	2513465,	-13.4052	-13.4012	-13.1709	-13.4395	-13.4725	-14.1995	-13.4863	-13.2688	-13.629	-13.3069	-13.5746	-13.4239	0.263423	0.332947	0.440953	0.508867
b3252	csrD	chr	-	3399413,	3401354,	-13.1739	-13.2261	-13.0166	-12.3691	-12.8141	-12.9041	-12.8381	-12.5843	-13.477	-13.1269	-12.6508	-12.8153	0.101561	0.157626	0.44447	0.512548
b3539	yhjV	chr	+	3698585,	3699857,	-13.9902	-14.3256	-14.9552	-14.5244	-14.9895	-15.1995	-15.0288	-14.6838	-14.2139	-14.4333	-14.836	-14.7561	0.244606	0.312952	0.445166	0.512973
b2132	bglX	chr	-	2217713,	2220011,	-12.2284	-11.9803	-12.1251	-12.4191	-12.1965	-12.1354	-12.0525	-12.4323	-11.477	-12.0982	-12.2609	-12.0676	0.285285	0.354568	0.447627	0.51543
b2735	ygbI	chr	-	2858488,	2859286,	-14.0543	-14.2965	-15.8032	-14.1765	-13.7814	-13.5715	-14.0605	-14.2181	-13.7989	-14.6338	-13.8659	-14.0716	0.246435	0.314552	0.449703	0.517059
b0888	trxB	chr	-	930307,	931273,	-10.9824	-11.1989	-11.2122	-11.288	-11.3881	-11.2666	-11.1558	-11.4323	-11.0045	-11.1448	-11.3271	-11.2236	0.117096	0.175981	0.453521	0.521067
b2832	ygdQ	chr	+	2968441,	2969155,	-13.0875	-13.6549	-13.2425	-14.0142	-13.9649	-14.489	-13.4649	-13.6167	-14.477	-13.3272	-14.0716	-13.6327	0.0253754	0.0587838	0.456977	0.524652
b0025	ribF	chr	+	21406,	22348,	-11.7858	-11.7555	-11.7072	-11.8273	-11.5996	-11.801	-11.771	-11.9162	-11.7545	-11.7439	-11.7175	-11.8186	0.93435	0.944604	0.469641	0.538696
b4160	psd	chr	-	4387414,	4388383,	-13.1387	-13.2399	-13.3569	-13.4603	-12.8475	-13.4495	-12.9674	-13.0988	-13.155	-13.2573	-13.1554	-13.0399	0.975382	0.979762	0.474166	0.543192
b1120	cobB	chr	+	1178742,	1179582,	-13.7064	-13.6549	-13.9156	-13.6619	-13.4725	-13.489	-13.508	-13.5525	-13.892	-13.7663	-13.542	-13.5748	0.100073	0.155934	0.478684	0.547967
b1059	solA	chr	-	1118690,	1119809,	-14.1918	-14.0096	-14.3437	-14.1425	-13.9168	-14.2666	-14.5524	-14.4323	-13.892	-14.1813	-14.06	-14.3935	0.631165	0.683544	0.479504	0.548505
b0109	nadC	chr	-	117751,	118645,	-14.3043	-14.2679	-14.8397	-14.6146	-14.2929	-13.7521	-14.1948	-14.3757	-14.7989	-14.478	-14.2709	-14.3346	0.47065	0.534085	0.490606	0.560385
b3353	yheT	chr	+	3481223,	3482246,	-14.5138	-14.0335	-14.9552	-14.2469	-13.7814	-14.1354	-13.9674	-14.2688	-14.3395	-14.4667	-14.0034	-14.1205	0.233751	0.301776	0.491598	0.56111
b2996	hybA	chr	-	3142175,	3143162,	-14.5596	-15.0335	-14.9156	-15.0452	-14.9895	-14.8516	-13.745	-15.0761	-14.9915	-14.852	-14.9814	-14.2597	0.480013	0.543922	0.493778	0.563188
b4382	deoA	chr	+	4616251,	4617574,	-13.2658	-13.548	-13.1139	-12.5688	-13.2777	-13.1995	-13.3824	-13.4037	-12.892	-13.2918	-12.9651	-13.3061	0.333338	0.40062	0.496496	0.565463
b3148	yraN	chr	+	3293415,	3293811,	-13.4052	-13.3256	-13.4247	-13.5464	-13.4725	-13.337	-13.1094	-13.7186	-12.9409	-13.3846	-13.4712	-13.2688	0.402482	0.470363	0.497993	0.566756
b0121	speE	chr	-	135597,	136464,	-12.4585	-12.7906	-12.2922	-12.7108	-12.7922	-12.4495	-12.3235	-12.7011	-12.5894	-12.4923	-12.6904	-12.4866	0.491613	0.55426	0.500433	0.56912
b1340	ydaL	chr	+	1404002,	1404566,	-13.9288	-14.6924	-14.6015	-14.8684	-15.5256	-14.8516	-15.0929	-15.0761	-14.3395	-14.4223	-15.1189	-14.9487	0.109049	0.166606	0.502188	0.570526
b1809	yoaB	chr	+	1891390,	1891735,	-12.5025	-12.1722	-12.3307	-12.7359	-12.3239	-12.4691	-12.4863	-12.4037	-12.3395	-12.3144	-12.4905	-12.4342	0.322948	0.391741	0.502398	0.570526
b3973	birA	chr	+	4171104,	4172070,	-13.1918	-13.6184	-14.1027	-13.8409	-14.0661	-14.1995	-13.8519	-13.5525	-14.2139	-13.653	-14.0034	-13.7821	0.26698	0.336356	0.507947	0.57641
b4167	yjeF	chr	+	4392088,	4393636,	-13.1387	-13.6005	-12.849	-12.4293	-12.8031	-12.4691	-12.8519	-12.9468	-12.3726	-13.1493	-12.5912	-12.8019	0.0834599	0.136706	0.509653	0.577926
b1614	ydgA	chr	+	1687875,	1689384,	-12.4263	-12.5225	-12.4177	-12.603	-12.8363	-12.8516	-12.8519	-12.6498	-12.5135	-12.4555	-12.7497	-12.7242	0.046073	0.0896276	0.510965	0.578995
b1958	yedI	chr	-	2026472,	2027390,	-14.2658	-14.2124	-14.6988	-13.7359	-14.0926	-15.074	-14.267	-14.4911	-15.2139	-14.4006	-14.0833	-14.4549	0.846667	0.86886	0.512433	0.580239
b0002	thrA	chr	+	336,	2799,	-13.4052	-13.531	-12.8677	-12.999	-13.1196	-13.0151	-13.3235	-13.5215	-12.7989	-13.2046	-13.0542	-13.2967	0.386801	0.455835	0.514279	0.581908
b2810	csdA	chr	+	2941358,	2942564,	-13.1044	-12.9631	-13.3437	-13.3209	-13.3397	-13.411	-13.3824	-13.4037	-12.892	-13.1403	-13.3463	-13.3061	0.18031	0.245536	0.516088	0.583336
b2939	yqgB	chr	-	3083941,	3084073,	-14.4263	-15.0824	-14.9958	-14.4813	-14.8031	-14.7521	-14.4231	-15.1692	-14.9915	-14.852	-14.6682	-14.7306	0.545858	0.606682	0.516658	0.583336
b4360	yjjA	chr	-	4597717,	4598212,	-13.9288	-13.8111	-14.6332	-14.6619	-14.5621	-13.801	-13.8799	-14.2688	-14.2139	-14.118	-14.4111	-14.0557	0.592416	0.648058	0.516295	0.583336
b4461	yfjD	chr	+	2746795,	2748082,	-13.038	-13.0949	-12.9652	-13.302	-13.4725	-14.074	-13.2486	-13.1454	-13.7989	-13.0279	-13.5022	-13.278	0.126914	0.187675	0.520176	0.586885
b3527	yhjJ	chr	-	3678466,	3679963,	-13.4477	-12.8529	-12.9059	-13.1259	-12.8933	-12.5715	-12.745	-13.1219	-13.155	-13.0073	-12.9017	-12.9268	0.457053	0.522823	0.528248	0.595134
b1036	ycdZ	chr	+	1099518,	1100010,	-12.3239	-12.5395	-12.5705	-12.7615	-13.0793	-12.3735	-12.7069	-12.7723	-12.155	-12.4923	-12.8018	-12.6327	0.331914	0.399828	0.531746	0.598645
b2529	iscU	chr	-	2657924,	2658311,	-13.1387	-12.9291	-13.3307	-13.5688	-13.6187	-13.5297	-13.745	-13.3757	-13.2753	-13.1313	-13.5828	-13.53	0.0569813	0.104244	0.533386	0.599788
b1763	topB	chr	-	1843022,	1844984,	-11.9363	-11.8635	-11.7632	-11.8684	-11.776	-12.1832	-11.7579	-12.0208	-11.7328	-11.841	-11.8811	-11.8424	0.560603	0.619552	0.533978	0.599863
b0128	yadH	chr	+	143701,	144472,	-14.1214	-14.1075	-14.0376	-13.8409	-14.5621	-14.074	-14.16	-13.6838	-14.0984	-14.083	-14.1678	-13.9635	0.773465	0.805082	0.534465	0.59998
b0050	apaG	chr	-	51228,	51606,	-13.3845	-13.3404	-13.2425	-12.9838	-13.2476	-13.5715	-13.3044	-13.6498	-13.2753	-13.3119	-13.1992	-13.4137	0.78093	0.810966	0.535902	0.601163
b3792	wzxE	chr	+	3974300,	3975551,	-13.1044	-13.0335	-12.9254	-12.999	-13.0531	-13.8516	-13.0288	-13.4323	-12.7545	-13.0073	-13.1554	-13.1122	0.417121	0.48393	0.53909	0.604306
b0478	ybaL	chr	-	500785,	502462,	-12.1828	-11.9688	-12.3437	-12.2559	-12.3881	-12.337	-12.1515	-12.5525	-11.7989	-12.163	-12.3288	-12.2192	0.271612	0.341094	0.542027	0.607163
b2837	galR	chr	+	2974620,	2975652,	-14.5596	-14.6184	-14.7675	-14.7108	-14.2037	-14.411	-14.6944	-14.2688	-14.7989	-14.6594	-14.4111	-14.5411	0.295665	0.364289	0.543061	0.607887
b0029	ispH	chr	+	26276,	27227,	-12.2009	-12.3183	-12.7157	-12.5027	-12.7495	-13.1995	-12.5524	-12.8473	-12.5894	-12.4278	-12.7266	-12.6566	0.194047	0.259877	0.544118	0.608635
b3472	dcrB	chr	+	3607977,	3608535,	-11.7456	-11.4933	-11.3938	-11.2379	-11.7028	-11.7164	-11.6515	-11.4468	-11.1265	-11.5125	-11.518	-11.4893	0.967811	0.97278	0.54687	0.611277
b2701	mltB	chr	-	2822512,	2823598,	-14.1562	-14.7309	-13.7157	-14.9249	-13.8933	-14.9585	-14.6455	-13.9886	-14.3395	-14.118	-14.3819	-14.3346	0.441193	0.506531	0.547908	0.611713
b1119	nagK	chr	+	1177815,	1178727,	-12.6434	-13.0215	-12.6988	-12.9249	-12.5346	-13.3014	-12.8519	-12.7186	-12.7114	-12.7873	-12.797	-12.7821	0.633498	0.685123	0.548042	0.611713
b2493	yfgO	chr	-	2612841,	2613903,	-13.5138	-13.1722	-13.5552	-14.077	-13.8475	-13.5715	-13.4649	-13.9886	-13.629	-13.4006	-13.8659	-13.6566	0.0947394	0.149408	0.552599	0.61636
b4024	lysC	chr	-	4229906,	4231256,	-15.4263	-15.4168	-14.7675	-13.9249	-14.0926	-14.1354	-14.4649	-15.0761	-13.551	-15.1269	-14.0371	-14.4549	0.0261933	0.0599688	0.554343	0.617138
b1105	ycfM	chr	+	1161860,	1162502,	-13.7064	-14.1855	-13.6822	-13.5027	-13.8475	-13.2666	-14.0929	-13.7186	-13.3395	-13.8447	-13.5912	-13.822	0.246439	0.314552	0.555043	0.617138
b0524	lpxH	chr	-	552440,	553163,	-12.1044	-12.1459	-11.9753	-12.0374	-12.1751	-12.4495	-11.9303	-12.1103	-12.307	-12.0659	-12.1709	-12.0438	0.357675	0.426271	0.555267	0.617138
b2865	ygeR	chr	-	2997157,	2997913,	-13.583	-13.3705	-13.2796	-13.379	-13.2476	-13.4495	-13.3429	-13.4614	-13.4066	-13.3846	-13.3323	-13.3935	0.655869	0.705918	0.555072	0.617138
b3475	acpT	chr	+	3610991,	3611579,	-14.0875	-14.2679	-14.0376	-14.7615	-14.0926	-14.6589	-14.4649	-14.2688	-14.3395	-14.1269	-14.4111	-14.3736	0.207641	0.273019	0.558638	0.620445
b3463	ftsE	chr	-	3600101,	3600770,	-12.1739	-12.1989	-11.9602	-12.061	-12.1333	-12.6366	-12.2125	-12.1935	-12.044	-12.0939	-12.1897	-12.1797	0.466503	0.530918	0.561335	0.622557
b3858	yihD	chr	+	4040091,	4040361,	-14.2284	-14.2124	-14.3972	-13.8139	-13.9895	-14.2666	-14.1948	-14.1692	-13.9915	-14.2868	-13.9705	-14.1541	0.181915	0.247291	0.563758	0.624802
b2171	yeiP	chr	+	2263471,	2264044,	-12.5251	-12.7309	-12.5937	-12.8823	-12.8702	-12.8516	-12.8109	-13.01	-12.4413	-12.6212	-12.871	-12.8153	0.0505342	0.0954651	0.564748	0.625456
b2744	surE	chr	-	2867534,	2868296,	-13.1918	-13.3554	-12.5178	-12.7486	-12.6381	-12.801	-12.9674	-13.0537	-12.5135	-12.9315	-12.7084	-12.9196	0.372127	0.441143	0.566704	0.626294
b3911	cpxA	chr	-	4101624,	4102998,	-12.8413	-13.0455	-12.6413	-12.6146	-12.6478	-12.9041	-13.0929	-13.3757	-12.3395	-12.8229	-12.6815	-13.0399	0.464241	0.529499	0.566458	0.626294
b1108	ycfP	chr	+	1164365,	1164908,	-13.583	-13.7505	-13.5252	-13.5915	-13.7182	-13.411	-13.6944	-13.5843	-13.629	-13.615	-13.6079	-13.6446	0.703506	0.745392	0.566067	0.626294
b1331	insH	chr	+	1394099,	1395116,	-11.7129	-11.5352	-11.5552	-11.4344	-11.4004	-11.3191	-11.5467	-11.3482	-11.3895	-11.5872	-11.3964	-11.4497	0.0400091	0.08074	0.573535	0.63295
b0742	ybgF	chr	+	778820,	779612,	-10.8735	-10.8905	-10.8843	-10.9876	-10.8788	-11.0442	-10.8554	-10.9315	-11.0045	-10.8837	-10.949	-10.9035	0.212292	0.277968	0.57323	0.63295
b4218	ytfL	chr	-	4437894,	4439238,	-13.5138	-13.1722	-13.1944	-13.34	-13.3397	-13.4495	-13.4649	-12.9062	-13.4066	-13.2622	-13.3605	-13.2325	0.537657	0.599694	0.579265	0.638823
b3775	ppiC	chr	-	3957554,	3957836,	-12.9746	-13.2821	-13.4247	-13.6619	-13.7814	-13.2327	-13.508	-13.4323	-13.4066	-13.2476	-13.6164	-13.4654	0.198143	0.264353	0.579802	0.638965
b2502	ppx	chr	+	2623136,	2624678,	-13.4694	-13.2965	-13.4669	-13.4813	-13.2328	-13.7048	-13.4649	-13.4911	-13.155	-13.406	-13.4037	-13.4239	0.705967	0.747495	0.588391	0.647975
b1830	prc	chr	-	1910791,	1912840,	-10.1365	-10.0855	-10.2922	-10.2091	-10.2644	-10.4349	-10.3116	-10.2882	-10.1623	-10.1773	-10.2751	-10.2804	0.227439	0.294843	0.589057	0.648253
b1766	sppA	chr	+	1846860,	1848717,	-13.247	-12.7805	-12.6413	-12.6263	-12.4046	-12.7282	-12.6098	-12.7011	-12.629	-12.8265	-12.542	-12.6446	0.238072	0.306092	0.598339	0.657543
b0052	pdxA	chr	-	52426,	53416,	-11.9669	-12.1075	-12.1251	-12.0531	-12.1751	-11.8776	-12.3044	-12.4037	-11.7765	-12.0766	-12.0687	-12.246	0.773721	0.805082	0.598199	0.657543
b1538	dcp	chr	-	1623358,	1625404,	-13.0875	-13.3705	-13.2547	-13.4191	-13.0273	-13.337	-13.2125	-13.1935	-13.155	-13.2476	-13.2184	-13.1971	0.879583	0.897932	0.598887	0.657684
b2317	dedA	chr	-	2432103,	2432763,	-13.4477	-13.8529	-13.4108	-14.1425	-14.0926	-13.9041	-14.3044	-13.8282	-13.629	-13.5598	-14.0716	-14.0089	0.0584956	0.105901	0.603559	0.66235
b1342	ydaN	chr	+	1406073,	1407057,	-14.5138	-15.133	-14.5401	-14.3594	-13.9168	-14.489	-14.6944	-14.0317	-14.477	-14.7118	-14.1678	-14.3935	0.151346	0.214681	0.606002	0.664566
b0376	ampH	chr	-	394353,	395511,	-13.0875	-13.2538	-13.5552	-12.7486	-12.9649	-12.7048	-13.267	-13.4323	-12.3395	-13.317	-12.831	-13.1372	0.0480645	0.092468	0.608623	0.666972
b3100	yqjK	chr	+	3248098,	3248398,	-13.9592	-14.4168	-13.4812	-13.1594	-13.2625	-13.5715	-13.9377	-13.5843	-12.9915	-13.8743	-13.2776	-13.6327	0.13395	0.195313	0.609789	0.667316
b3017	sufI	chr	-	3159278,	3160691,	-12.8844	-12.918	-12.6252	-12.9541	-12.9771	-13.074	-13.0288	-13.1935	-12.2753	-12.7873	-12.9869	-12.9414	0.161844	0.227103	0.611182	0.668374
b3646	yicG	chr	+	3816896,	3817514,	-12.9288	-12.9517	-13.0807	-12.9689	-13.5621	-13.7521	-13.7195	-12.9676	-13.044	-12.9951	-13.3463	-13.3061	0.198971	0.264731	0.612799	0.669674
b0031	dapB	chr	+	28373,	29195,	-13.5138	-13.3858	-13.1826	-12.8964	-13.2037	-12.3922	-12.7842	-13.0988	-13.044	-13.3323	-12.9017	-12.9268	0.141702	0.204521	0.615142	0.671766
b4206	ytfB	chr	-	4426101,	4426740,	-13.4477	-13.133	-13.1826	-13.2113	-13.0793	-12.9585	-13.3824	-13.8667	-12.629	-13.2283	-13.101	-13.3835	0.23798	0.306092	0.621952	0.67873
b2250	yfaZ	chr	-	2361754,	2362297,	-13.6069	-13.8743	-13.7157	-13.8684	-14.1471	-14.7521	-13.9377	-14.4323	-13.892	-13.7388	-14.131	-14.0877	0.174892	0.240246	0.622873	0.679261
b3030	parE	chr	-	3171525,	3173418,	-11.6746	-12.0638	-11.849	-12.1176	-12.161	-11.7641	-11.8381	-11.9676	-12.0175	-11.8705	-12.06	-11.9088	0.419752	0.486192	0.633105	0.689939
b3054	ygiF	chr	-	3197685,	3198987,	-13.4477	-13.2124	-13.9353	-13.1594	-13.2929	-13.4495	-13.267	-13.5525	-13.2753	-13.5242	-13.2709	-13.3638	0.396705	0.465349	0.636379	0.692543
b3423	glpR	chr	-	3557869,	3558628,	-13.3043	-12.918	-13.5552	-13.2469	-13.4212	-13.489	-13.4649	-13.3212	-13.2139	-13.2427	-13.3676	-13.3736	0.57628	0.634353	0.636052	0.692543
b1381	ydbH	chr	+	1441074,	1443714,	-13.364	-13.5828	-12.8867	-13.7874	-13.3397	-13.801	-13.3235	-13.4911	-13.7989	-13.2188	-13.5746	-13.4445	0.232136	0.300186	0.637383	0.693155
b4169	amiB	chr	+	4394087,	4395425,	-11.9064	-11.7805	-12.001	-11.7809	-11.9958	-11.7401	-11.9303	-11.8282	-11.892	-11.8969	-11.8634	-11.8875	0.606502	0.660727	0.64092	0.696516
b3199	yrbK	chr	+	3340857,	3341433,	-13.2658	-13.0455	-13.2547	-13.4603	-14.0146	-13.4495	-13.6216	-13.6838	-13.2753	-13.1813	-13.6771	-13.5862	0.122853	0.182813	0.641937	0.696656
b2292	yfbS	chr	-	2407541,	2409374,	-13.3438	-14.0824	-13.7157	-13.7108	-13.3239	-13.1995	-14.0288	-13.4323	-13.2139	-13.7185	-13.4259	-13.6566	0.319879	0.389224	0.641612	0.696656
b2217	rcsB	chr	+	2314198,	2314849,	-11.8844	-11.9235	-11.9804	-11.9468	-12.0337	-12.1354	-12.0929	-11.8377	-12.044	-11.9354	-12.0202	-11.9898	0.173229	0.238818	0.650227	0.705163
b1768	pncA	chr	+	1849910,	1850552,	-13.8133	-13.4485	-13.5552	-13.7615	-13.7182	-13.7521	-14.0605	-13.2432	-13.551	-13.578	-13.7404	-13.6446	0.329583	0.397353	0.650783	0.705278
b2522	sseB	chr	-	2652178,	2652955,	-13.8133	-13.5141	-13.6494	-13.9541	-14.2929	-14.1354	-13.9085	-14.2688	-13.9915	-13.6402	-14.131	-14.0399	0.0236232	0.0560515	0.652525	0.706677
b1096	pabC	chr	+	1152522,	1153332,	-14.5138	-14.4168	-14.0166	-14.7615	-15.1471	-15.074	-15.2304	-14.9062	-14.477	-14.2671	-14.9814	-14.9785	0.0269226	0.0612802	0.653452	0.706775
b1055	yceA	chr	+	1116029,	1117082,	-12.7858	-13.07	-12.9552	-13.302	-13.8933	-13.411	-13.4863	-13.4911	-13.3395	-12.9471	-13.5582	-13.4654	0.0632182	0.111991	0.653519	0.706775
b4383	deoB	chr	+	4617625,	4618849,	-11.6311	-11.596	-11.3803	-11.7423	-11.6091	-11.6366	-11.6636	-11.5843	-11.6696	-11.5154	-11.6617	-11.6357	0.24646	0.314552	0.660174	0.71348
b1661	cfa	chr	+	1739436,	1740585,	-13.0543	-12.9978	-13.0483	-13.5244	-13.1196	-13.801	-13.4231	-13.1454	-13.551	-13.0321	-13.3747	-13.3346	0.150675	0.213923	0.668245	0.721705
b3182	dacB	chr	+	3326984,	3328418,	-14.5138	-14.1855	-14.1478	-13.7359	-14.1751	-13.6589	-13.53	-14.6838	-13.892	-14.2476	-13.8965	-13.9052	0.105166	0.161619	0.669361	0.722412
b3551	bisC	chr	-	3712083,	3714417,	-13.6311	-13.3256	-13.7675	-13.5244	-13.5077	-13.489	-13.3824	-13.5215	-13.7989	-13.5659	-13.5101	-13.4866	0.656169	0.705918	0.670096	0.722707
b0639	nadD	chr	-	669153,	669795,	-14.2658	-14.0824	-14.8032	-15.3209	-14.8933	-15.1995	-14.745	-14.8282	-15.477	-14.3793	-15.0951	-14.863	0.0521267	0.097644	0.676463	0.729071
b1238	tdk	chr	+	1292749,	1293367,	-13.8133	-13.531	-13.8397	-13.7615	-14.1196	-14.5715	-13.9978	-13.7186	-14.3395	-13.7185	-14.0485	-13.9341	0.205373	0.271175	0.678869	0.731162
b2901	bglA	chr	+	3041683,	3043123,	-12.7858	-12.7309	-12.6173	-12.7874	-12.8933	-12.1512	-12.7069	-12.6167	-12.8447	-12.6985	-12.6815	-12.6931	0.709172	0.750381	0.681861	0.733635
b0761	modE	chr	-	793078,	793867,	-14.7589	-14.0824	-15.5401	-14.7108	-14.7182	-14.074	-15.3824	-14.3212	-14.3395	-14.6985	-14.5664	-14.7561	0.579647	0.636555	0.688184	0.739161
b1961	dcm	chr	-	2028922,	2030341,	-12.7064	-12.5566	-12.849	-12.9689	-13.4212	-12.9865	-12.9377	-13.2948	-12.892	-12.7052	-13.1554	-13.0477	0.0849288	0.137965	0.689276	0.739826
b1187	fadR	chr	+	1234160,	1234880,	-12.8555	-12.548	-12.7072	-12.5688	-12.8363	-12.411	-12.6575	-12.9676	-12.4413	-12.6854	-12.6464	-12.7242	0.558228	0.617362	0.694189	0.744589
b2524	iscX	chr	-	2654557,	2654758,	-14.6069	-14.1075	-13.9353	-13.8964	-14.2037	-14.6589	-14.16	-14.3757	-13.892	-14.1448	-14.1554	-14.1884	0.908988	0.923138	0.698827	0.749051
b1054	lpxL	chr	-	1114884,	1115805,	-13.9592	-13.9403	-13.5552	-13.6146	-13.76	-14.6589	-13.8519	-13.7542	-13.9915	-13.7802	-13.836	-13.8355	0.626694	0.679171	0.702669	0.752653
b3053	glnE	chr	-	3194822,	3197663,	-12.8273	-12.9978	-12.7852	-12.1765	-13.0531	-12.5715	-12.8244	-12.7186	-12.5894	-12.8668	-12.587	-12.7497	0.400025	0.468541	0.710134	0.76013
b2214	apbE	chr	-	2308500,	2309556,	-14.2284	-14.8959	-14.0166	-14.8139	-14.7182	-14.7521	-14.1261	-14.8282	-14.9915	-14.3272	-14.759	-14.4549	0.286357	0.355337	0.712937	0.762609
b3201	lptB	chr	+	3341965,	3342691,	-12.8991	-13.548	-13.2303	-13.5915	-13.3718	-13.1354	-13.2856	-13.6498	-12.8447	-13.2331	-13.3964	-13.325	0.576427	0.634353	0.716634	0.76604
b2600	tyrA	chr	-	2736969,	2738091,	-14.3845	-14.4809	-14.5104	-14.1094	-14.2625	-13.9041	-14.16	-14.9886	-13.629	-14.4667	-14.131	-14.2967	0.057952	0.105342	0.717994	0.766903
b0582	insL	chr	+	607287,	608400,	-13.7064	-14.0335	-13.6173	-13.7874	-13.6187	-14.411	-14.16	-13.6838	-13.629	-13.7732	-13.8066	-13.891	0.612225	0.665333	0.718421	0.766903
b0086	murF	chr	+	94649,	96008,	-11.7723	-11.8905	-11.7072	-12.0452	-12.0273	-11.9447	-11.9674	-11.7452	-12.155	-11.7855	-12.0174	-11.9088	0.0361044	0.07526	0.71892	0.766914
b2329	aroC	chr	-	2444409,	2445495,	-12.7064	-12.7407	-12.7242	-12.9249	-12.739	-12.8516	-12.8109	-13.0761	-12.3726	-12.7253	-12.8261	-12.822	0.164109	0.229664	0.722263	0.769431
b0868	ybjS	chr	-	904962,	905976,	-13.364	-13.6005	-13.9156	-13.8139	-13.9168	-14.074	-14.267	-13.2948	-13.892	-13.6466	-13.9068	-13.7953	0.18432	0.249047	0.723993	0.770226
b3725	pstB	chr	-	3905615,	3906389,	-13.4263	-13.3858	-13.2922	-13.3594	-13.5437	-14.1354	-13.508	-13.4323	-13.7989	-13.3582	-13.5664	-13.5191	0.313922	0.383464	0.727219	0.773133
b1064	grxB	chr	-	1122629,	1123277,	-14.3845	-14.5141	-13.9552	-14.6146	-13.8933	-13.9041	-13.9377	-14.3212	-14.477	-14.2379	-14.1189	-14.1372	0.643754	0.694775	0.728907	0.774402
b0711	ybgJ	chr	+	742815,	743472,	-14.1918	-15.133	-14.1709	-14.0452	-14.5996	-14.1354	-14.9674	-14.5525	-13.7114	-14.4444	-14.2843	-14.5634	0.554661	0.613851	0.737949	0.783477
b3773	ilvY	chr	-	3954949,	3955843,	-14.6558	-14.1855	-14.5401	-14.1425	-14.1196	-14.1354	-14.1948	-14.3212	-13.9915	-14.4333	-14.131	-14.2059	0.146048	0.20906	0.739509	0.784601
b0738	tolR	chr	+	775071,	775500,	-13.3239	-13.3404	-13.059	-13.5464	-13.2037	-13.3014	-13.508	-13.5843	-12.5894	-13.2188	-13.3393	-13.354	0.469248	0.533268	0.743208	0.787992
b3226	nanR	chr	-	3371719,	3372511,	-13.7589	-13.8529	-13.4386	-13.6619	-13.7182	-14.074	-13.7975	-13.2688	-14.0984	-13.653	-13.759	-13.6209	0.496	0.5576	0.748279	0.792831
b2619	yfjG	chr	-	2752309,	2752786,	-13.1044	-12.8635	-13.1251	-13.302	-13.1893	-13.1044	-12.7069	-12.8282	-13.7114	-13.0238	-13.212	-12.863	0.183895	0.248902	0.750253	0.794385
b1711	btuC	chr	-	1792195,	1793176,	-13.5365	-13.6549	-13.3437	-14.1094	-13.6978	-13.9585	-14.0605	-14.1219	-13.2753	-13.4952	-13.8862	-13.9341	0.0571347	0.104402	0.755085	0.798961
b2806	ygdE	chr	-	2938164,	2939265,	-12.0875	-11.9861	-11.9804	-11.9394	-12.4381	-12.3191	-12.3332	-12.1935	-11.9915	-12.0094	-12.2152	-12.2281	0.288366	0.356998	0.760189	0.803819
b4159	yjeP	chr	-	4384069,	4387393,	-11.8203	-11.8635	-11.7764	-11.6984	-11.9168	-11.8261	-11.9599	-12.0761	-11.5701	-11.8175	-11.8163	-11.9341	0.932957	0.944415	0.76444	0.807769
b2927	epd	chr	-	3070693,	3071713,	-10.5509	-10.6229	-10.5196	-10.5745	-10.6978	-10.4593	-10.5953	-10.5843	-10.477	-10.5629	-10.6037	-10.5733	0.877801	0.896697	0.7704	0.813518
b2938	speA	chr	-	3081956,	3083933,	-10.1301	-10.3404	-10.3955	-10.2927	-10.3377	-10.3689	-10.4154	-10.2559	-10.2753	-10.3037	-10.3271	-10.3358	0.642776	0.694198	0.771643	0.814281
b3064	ygjD	chr	-	3207551,	3208565,	-12.7064	-12.5653	-12.9452	-12.8964	-12.739	-13.074	-13.0132	-13.1454	-12.2753	-12.7422	-12.8559	-12.9196	0.328184	0.397169	0.774177	0.816405
b1446	ydcY	chr	+	1515671,	1515905,	-13.4477	-13.2821	-13.4669	-13.2834	-13.3557	-13.1995	-13.6455	-13.3212	-13.044	-13.3953	-13.2979	-13.4239	0.186615	0.251637	0.776403	0.818202
b3500	gor	chr	+	3644321,	3645674,	-12.1474	-12.159	-12.2922	-12.229	-12.4297	-12.3191	-12.4128	-12.1336	-12.3395	-12.207	-12.3323	-12.2967	0.167806	0.233587	0.78022	0.821671
b0167	glnD	chr	-	185977,	188650,	-14.8699	-14.2124	-14.1709	-14.3209	-14.2929	-14.5715	-14.9674	-14.4911	-13.9915	-14.3375	-14.3534	-14.6093	0.932484	0.944415	0.789055	0.830417
b0893	serS	chr	+	938650,	939943,	-10.497	-10.778	-10.6946	-10.677	-10.576	-10.5557	-10.5272	-10.6838	-10.6491	-10.6683	-10.6079	-10.5991	0.601694	0.656165	0.791721	0.832663
b0424	yajL	chr	-	442274,	442865,	-13.9902	-13.9861	-14.1027	-14.2834	-14.1471	-13.6589	-14.0288	-14.2181	-13.629	-14.0321	-14.0833	-14.0243	0.98728	0.989627	0.795706	0.836293
b2670	ygaW	chr	+	2797185,	2797635,	-13.1562	-13.6549	-13.3437	-13.4813	-13.9168	-14.0151	-13.3824	-13.7186	-14.0984	-13.3899	-13.759	-13.5862	0.129248	0.190228	0.801217	0.84152
b1293	sapB	chr	-	1352528,	1353494,	-14.0219	-13.8529	-13.9552	-14.2834	-14.7182	-14.489	-14.1261	-14.8282	-14.3395	-13.9354	-14.5022	-14.3736	0.0342928	0.0727666	0.802996	0.842823
b4111	proP	chr	+	4328524,	4330027,	-12.0139	-12.0037	-11.9652	-12.2469	-12.3718	-12.5929	-12.3527	-12.4614	-12.307	-11.991	-12.364	-12.3835	0.0531722	0.0989913	0.804976	0.844335
b0155	clcA	chr	+	175106,	176528,	-13.247	-12.9978	-12.8213	-12.6984	-12.8363	-12.9865	-12.8799	-12.9676	-12.7545	-12.9829	-12.8115	-12.891	0.298156	0.366493	0.808877	0.847859
b3811	xerC	chr	+	3994309,	3995206,	-13.583	-14.2399	-13.4527	-13.3209	-12.9771	-13.2666	-13.5982	-13.4323	-12.7545	-13.7185	-13.1493	-13.3835	0.12986	0.190949	0.811599	0.850143
b0413	nrdR	chr	+	432225,	432675,	-13.3845	-14.0577	-14.1478	-13.6862	-14.4552	-13.7521	-14.0288	-13.9468	-13.7114	-13.8818	-13.9924	-13.9487	0.783584	0.812644	0.813676	0.851749
b3462	ftsX	chr	-	3599050,	3600109,	-12.0299	-12.1524	-11.8963	-12.229	-12.3637	-12.0151	-12.2214	-12.3482	-11.9162	-12.0155	-12.2412	-12.2147	0.23921	0.306917	0.816646	0.854287
b4481	rffT	chr	+	3975547,	3976627,	-13.5596	-13.3256	-13.2547	-13.2469	-13.3557	-13.3014	-13.4438	-13.3757	-13.155	-13.353	-13.3047	-13.3736	0.489622	0.552412	0.818781	0.855912
b1656	sodB	chr	+	1733401,	1733983,	-9.80986	-9.64802	-9.68734	-9.70153	-9.62109	-9.72821	-9.71001	-9.64357	-9.72743	-9.70394	-9.67044	-9.68847	0.622802	0.676358	0.819293	0.855912
b0662	ubiF	chr	+	694323,	695499,	-13.0219	-12.5916	-12.849	-12.5576	-12.5077	-12.3191	-12.9674	-12.5843	-12.044	-12.7943	-12.4866	-12.6566	0.0832324	0.136706	0.820614	0.856721
b0095	ftsZ	chr	+	105304,	106456,	-10.5422	-10.5352	-10.5289	-10.302	-10.5854	-10.5557	-10.5467	-10.5063	-10.459	-10.5345	-10.4702	-10.5191	0.606721	0.660727	0.825812	0.861574
b1116	lolC	chr	+	1174649,	1175849,	-12.0543	-12.333	-12.0323	-12.4708	-12.4212	-12.1044	-12.2577	-12.4037	-12.2443	-12.1358	-12.3712	-12.3061	0.271417	0.341094	0.826645	0.861868
b2618	yfjF	chr	-	2752029,	2752320,	-13.7858	-13.8743	-14.1027	-14.2113	-13.76	-13.9041	-13.5524	-13.9468	-14.2139	-13.9354	-13.9383	-13.769	0.830592	0.85409	0.829698	0.863901
b0188	tilS	chr	+	212330,	213629,	-13.2849	-13.6184	-13.4669	-12.9106	-12.9895	-13.0442	-13.0605	-13.0988	-12.8447	-13.4667	-12.9705	-13.0399	0.0259168	0.0595971	0.8363	0.870196
b2896	ygfX	chr	-	3038437,	3038845,	-13.364	-13.2261	-12.9753	-12.9106	-13.3718	-13.1044	-13.0929	-13.4911	-12.9409	-13.1539	-13.137	-13.1971	0.751809	0.789097	0.83868	0.872094
b1667	ydhR	chr	+	1744723,	1745029,	-13.2284	-13.2261	-12.9059	-13.302	-13.6776	-13.5297	-13.3625	-13.7542	-13.2753	-13.0917	-13.5022	-13.476	0.0665469	0.116179	0.842487	0.875225
b3644	yicC	chr	+	3814698,	3815562,	-12.5025	-13.0096	-12.474	-12.8139	-12.5621	-13.074	-12.8941	-12.8863	-12.551	-12.6466	-12.7404	-12.8355	0.536254	0.598555	0.84281	0.875225
b3915	fieF	chr	+	4104491,	4105394,	-11.8273	-11.7805	-11.5782	-12.1259	-11.8933	-11.7763	-11.945	-12.0317	-11.7328	-11.7085	-11.949	-11.9414	0.193537	0.259486	0.843446	0.875305
b2411	ligA	chr	-	2526182,	2528198,	-12.0791	-12.233	-12.3569	-12.3889	-12.49	-12.489	-12.4334	-12.6167	-12.2443	-12.2379	-12.4521	-12.4654	0.0851126	0.13812	0.84505	0.87639
b0178	skp	chr	+	200481,	200967,	-10.4886	-10.3128	-10.3388	-10.5745	-10.386	-10.4691	-10.3405	-10.4762	-10.5605	-10.3667	-10.4683	-10.4188	0.280138	0.349559	0.845803	0.87659
b2011	sbcB	chr	+	2080779,	2082207,	-14.8699	-13.5828	-14.3437	-14.2834	-14.7182	-14.9585	-14.9085	-14.5525	-14.3395	-14.1269	-14.5828	-14.6808	0.425638	0.492282	0.846988	0.877237
b4351	mrr	chr	+	4584971,	4585886,	-14.4263	-14.3554	-15.4812	-14.3209	-13.8933	-13.4495	-13.9978	-14.0317	-13.7989	-14.7253	-13.9278	-13.9785	0.130659	0.191764	0.850856	0.880661
b0421	ispA	chr	-	439425,	440325,	-12.2849	-12.6549	-12.5705	-12.6381	-12.5529	-12.801	-12.9524	-12.5525	-12.3726	-12.5184	-12.6292	-12.7055	0.305597	0.374757	0.852285	0.881558
b2038	rfbC	chr	-	2107604,	2108162,	-12.7589	-12.9291	-13.0483	-13.5027	-13.3083	-13.801	-13.2304	-13.3482	-13.892	-12.9276	-13.4635	-13.354	0.0288283	0.0643093	0.860111	0.887308
b3771	ilvD	chr	+	3951500,	3953351,	-14.8699	-13.8959	-14.3177	-13.6146	-13.8475	-13.7048	-14.267	-13.9468	-13.155	-14.2671	-13.7312	-13.9341	0.145231	0.20808	0.859005	0.887308
b3028	mdaB	chr	+	3170551,	3171133,	-14.4263	-14.1075	-13.9753	-14.0142	-14.49	-14.2666	-14.1948	-14.6838	-13.7114	-14.1269	-14.2576	-14.2597	0.672892	0.720758	0.859794	0.887308
b3348	slyX	chr	+	3475661,	3475880,	-13.8991	-13.5653	-13.6822	-13.4603	-13.2777	-14.074	-13.7975	-13.2948	-13.892	-13.6919	-13.4712	-13.6093	0.700422	0.744644	0.859875	0.887308
b1570	dicA	chr	+	1645957,	1646365,	-12.8699	-13.2399	-12.9059	-13.4191	-13.4725	-13.337	-13.53	-13.3757	-13.2753	-13.0032	-13.4259	-13.4342	0.0631932	0.111991	0.862013	0.888119
b4262	yjgQ	chr	+	4485340,	4486423,	-11.5596	-11.4365	-11.4957	-11.5973	-11.3477	-11.1591	-11.4543	-11.6498	-11.1124	-11.4909	-11.3928	-11.4628	0.417864	0.484364	0.862031	0.888119
b3289	rsmB	chr	+	3433228,	3434518,	-13.8413	-13.8318	-12.9652	-14.3209	-14.3557	-13.6589	-14.3044	-13.6498	-14.2139	-13.4278	-14.1803	-14.0243	0.203598	0.269286	0.864131	0.889113
b3157	yhbT	chr	-	3298773,	3299298,	-13.4263	-13.3404	-13.6015	-12.5027	-12.76	-13.1044	-12.8659	-12.8473	-12.7545	-13.4611	-12.7175	-12.8424	0.0451821	0.0888119	0.866668	0.89097
b1186	nhaB	chr	-	1232398,	1233940,	-11.9669	-12.233	-12.1139	-12.3989	-12.3083	-12.2496	-12.4543	-12.2688	-12.1842	-12.1136	-12.3288	-12.3443	0.0894413	0.143695	0.867074	0.89097
b2564	pdxJ	chr	-	2699019,	2699751,	-13.1044	-13.0215	-12.6332	-12.7874	-12.5346	-12.9041	-12.7842	-13.1219	-12.4413	-12.8743	-12.6904	-12.8355	0.387301	0.456025	0.868235	0.891578
b3059	ygiH	chr	+	3202715,	3203333,	-14.1214	-13.9403	-13.8583	-13.7615	-13.8475	-14.1995	-14.1261	-14.2688	-13.551	-13.951	-13.876	-14.0716	0.824731	0.849131	0.869009	0.891788
b4395	ytjC	chr	+	4631819,	4632467,	-13.5596	-13.1075	-12.9156	-12.4708	-12.708	-13.1671	-12.8941	-12.8093	-12.7545	-13.1269	-12.6904	-12.8424	0.214756	0.28049	0.87308	0.895378
b0006	yaaA	chr	-	5682,	6459,	-14.7589	-14.4485	-14.6988	-14.4813	-14.4212	-15.337	-14.508	-15.0761	-14.477	-14.6212	-14.5828	-14.6808	0.749501	0.787202	0.875873	0.897655
b2188	yejM	chr	+	2282397,	2284158,	-11.4585	-11.7855	-11.4527	-11.9615	-11.876	-11.6037	-11.8042	-11.7363	-11.8447	-11.5613	-11.8484	-11.7854	0.182583	0.247768	0.881422	0.902162
b1380	ldhA	chr	-	1439877,	1440867,	-13.0875	-14.0335	-13.7852	-13.8964	-13.5437	-13.411	-13.9377	-13.7542	-13.2753	-13.6402	-13.6335	-13.7561	0.957631	0.963786	0.882792	0.902974
b3438	gntR	chr	-	3575753,	3576749,	-12.6936	-12.6275	-12.8772	-12.3209	-12.3318	-12.7282	-12.53	-12.4762	-12.4413	-12.7388	-12.3964	-12.4974	0.169901	0.235873	0.884733	0.904368
b3634	coaD	chr	+	3807847,	3808327,	-14.1918	-13.6366	-13.6822	-13.9249	-14.0146	-14.1995	-14.4649	-13.5525	-13.9915	-13.7802	-14.0146	-14.0089	0.367617	0.436459	0.887344	0.906333
b2325	yfcL	chr	-	2441912,	2442191,	-13.4694	-12.8318	-13.1139	-13.0452	-13.3239	-13.489	-13.3429	-13.2948	-13.155	-13.0874	-13.2444	-13.2967	0.551821	0.612006	0.887813	0.906333
b2827	thyA	chr	-	2962382,	2963177,	-12.8133	-12.5653	-12.3372	-13.5688	-13.0146	-13.0442	-13.16	-12.7907	-13.551	-12.5272	-13.1992	-13.0636	0.0519862	0.0974974	0.889841	0.907421
b0200	gmhB	chr	+	222832,	223408,	-13.2658	-13.4168	-13.4957	-13.4813	-13.2182	-13.1671	-13.5751	-13.2688	-13.0984	-13.406	-13.2979	-13.3835	0.435467	0.501427	0.890037	0.907421
b3006	exbB	chr	-	3149271,	3150006,	-13.0543	-12.3705	-12.474	-12.9106	-12.6091	-12.6366	-12.9085	-12.6004	-12.5894	-12.5629	-12.7175	-12.7433	0.739444	0.778205	0.898488	0.91544
b1794	yeaP	chr	+	1875738,	1876764,	-14.3438	-14.5828	-14.0807	-14.5688	-13.9406	-14.489	-14.1948	-14.5525	-14.3395	-14.3069	-14.2444	-14.3346	0.990986	0.991825	0.903246	0.91969
b2388	glk	chr	-	2506482,	2507448,	-13.2284	-13.0949	-13.1709	-13.4191	-13.2625	-13.2666	-13.3235	-13.7186	-12.7989	-13.1584	-13.3184	-13.354	0.0835587	0.136706	0.906481	0.922384
b0120	speD	chr	-	134787,	135582,	-12.8273	-13.6549	-13.3177	-13.7874	-13.76	-14.074	-13.5751	-13.7542	-14.2139	-13.272	-13.8261	-13.718	0.112508	0.170725	0.911041	0.926422
b1162	ycgE	chr	-	1212550,	1213282,	-13.21	-13.4809	-13.3569	-12.9689	-13.6187	-13.489	-12.9825	-13.3757	-13.629	-13.3582	-13.3254	-13.1971	0.967337	0.97278	0.918435	0.933335
b0388	aroL	chr	+	405628,	406153,	-14.8699	-13.8959	-14.1944	-15.0452	-15.2625	-14.7521	-15.6455	-14.4911	-14.7989	-14.2188	-15.0716	-15.0089	0.119875	0.179502	0.919762	0.934078
b2712	hypF	chr	-	2833194,	2835447,	-15.3438	-14.6924	-15.1709	-14.5244	-14.2625	-14.337	-14.5524	-14.2688	-14.3395	-15.0238	-14.3676	-14.4137	0.0551186	0.101667	0.920981	0.934709
b3960	argH	chr	+	4154872,	4156246,	-14.1214	-14.0577	-14.8032	-14.1765	-14.1196	-14.337	-14.9674	-13.9886	-13.7989	-14.3272	-14.1803	-14.354	0.678835	0.726131	0.92162	0.934752
b2193	narP	chr	+	2288521,	2289169,	-12.2946	-12.0949	-12.4316	-12.1425	-12.161	-12.1512	-12.267	-12.1935	-12.0175	-12.272	-12.1523	-12.2015	0.337955	0.405546	0.92623	0.938236
b4388	serB	chr	+	4622917,	4623886,	-13.4263	-13.4485	-13.6494	-13.3209	-13.7182	-13.0442	-13.3625	-13.3757	-13.4066	-13.5184	-13.4185	-13.3736	0.539769	0.601194	0.926254	0.938236
b2039	rfbA	chr	-	2108161,	2109043,	-12.0462	-12.0335	-12.2859	-12.8409	-12.4552	-12.4691	-12.4863	-12.2688	-12.9409	-12.1313	-12.587	-12.4602	0.0445888	0.0878315	0.927217	0.938605
b0177	yaeT	chr	+	197927,	200360,	-9.81159	-9.84495	-9.86771	-9.96704	-9.92715	-10.0628	-10.0585	-9.77461	-10.0915	-9.84514	-9.96712	-9.95519	0.0541818	0.100294	0.927939	0.938729
b2327	yfcA	chr	-	2442772,	2443582,	-13.7064	-13.7704	-13.7852	-14.2834	-13.7182	-13.801	-13.6944	-13.8282	-14.2139	-13.7594	-13.9173	-13.8086	0.414393	0.481766	0.929927	0.940133
b2209	eco	chr	+	2301926,	2302415,	-13.6069	-13.2679	-13.2547	-13.8409	-13.1196	-13.7521	-13.1948	-13.3212	-14.0984	-13.3426	-13.4635	-13.3443	0.501475	0.562543	0.932679	0.942307
b0009	mog	chr	+	9305,	9893,	-13.247	-13.3858	-13.1364	-13.2113	-13.2328	-12.9041	-13.3044	-12.8093	-13.2753	-13.2476	-13.1554	-13.104	0.343309	0.411341	0.947293	0.956455
b2948	yqgE	chr	+	3090958,	3091522,	-14.7064	-14.5141	-15.2182	-14.9249	-14.6776	-14.337	-14.3824	-14.6167	-14.9915	-14.8085	-14.6859	-14.5411	0.573173	0.632105	0.948125	0.956678
b0192	nlpE	chr	+	215268,	215979,	-14.0543	-13.8318	-14.6015	-13.5244	-13.5621	-14.1995	-13.6216	-13.7186	-13.9915	-14.1539	-13.6508	-13.7055	0.274688	0.343854	0.954476	0.961846
b1099	holB	chr	+	1154984,	1155989,	-13.4914	-14.0096	-13.6015	-14.1425	-13.739	-13.3735	-13.5524	-13.9468	-13.7114	-13.6985	-13.7874	-13.7055	0.861913	0.882193	0.956453	0.963219
b1199	dhaL	chr	-	1248347,	1248980,	-12.2754	-12.1394	-12.1307	-13.5464	-13.2182	-12.931	-13.3044	-13.1454	-13.2139	-12.1698	-13.2642	-13.2325	0.0216477	0.0529692	0.958561	0.964721
b4161	rsgA	chr	-	4388479,	4389532,	-12.3043	-12.6642	-12.6094	-12.4089	-12.49	-12.9041	-12.923	-12.537	-12.307	-12.5419	-12.5299	-12.6747	0.714705	0.755215	0.962026	0.967587
b1869	yecN	chr	+	1950289,	1950685,	-13.0708	-13.4485	-13.1139	-13.1594	-13.5437	-13.1995	-13.8244	-13.1454	-12.892	-13.2093	-13.3254	-13.3935	0.626488	0.679171	0.96733	0.971673
b3037	ygiB	chr	+	3177765,	3178437,	-13.2658	-13.6184	-13.3702	-13.229	-13.4552	-13.8516	-13.3824	-13.7186	-13.4066	-13.4223	-13.4333	-13.4974	0.683641	0.729777	0.967205	0.971673
b3464	ftsY	chr	-	3600772,	3602266,	-11.4316	-11.4727	-11.2609	-11.3691	-11.3239	-11.4495	-11.3824	-11.5763	-11.199	-11.3753	-11.364	-11.4188	0.925277	0.937853	0.968379	0.972104
b4472	yhdP	chr	-	3390479,	3394280,	-11.1784	-11.2503	-11.2578	-11.2424	-11.3597	-11.1512	-11.2997	-11.2623	-11.1842	-11.2343	-11.2742	-11.2688	0.759018	0.794003	0.975186	0.978309
b4349	hsdM	chr	-	4579481,	4581071,	-13.4477	-13.2538	-13.8772	-13.1765	-13.0273	-13.489	-13.2856	-13.3757	-13.044	-13.5242	-13.1616	-13.278	0.272226	0.341318	0.981669	0.983406
b3825	pldB	chr	+	4007192,	4008215,	-13.1918	-12.8423	-12.9652	-12.5244	-13.1751	-12.7521	-12.9085	-13.01	-12.551	-12.9749	-12.8261	-12.884	0.459499	0.525238	0.981111	0.983406
b2952	yggT	chr	+	3093841,	3094408,	-13.4694	-13.4012	-13.5401	-13.4603	-13.8475	-13.337	-13.6944	-13.4614	-13.477	-13.4724	-13.5912	-13.5748	0.666816	0.715228	0.982778	0.983406
b0027	lspA	chr	+	25206,	25701,	-11.4585	-11.8635	-11.8259	-11.8206	-11.6776	-12.0296	-12.1345	-11.8863	-11.4951	-11.7337	-11.7922	-11.9341	0.48708	0.550509	0.986252	0.986252
b4279	yjhB	chr	+	4502080,	4503298,	-16.0543	-14.9403	-15.0376	-13.4395	-13.3881	-13.4495	-17.5524	-17.4911	-inf	-15.1999	-13.4185	-17.7561	0.0324789	0.0702513	0	0
Below are not complemented (and so, no t-tests were performed)
b0008	talB	chr	+	8237,	9191,	-9.88258	-9.64113	-9.66566	-9.92315	-9.78411	-9.86453	-10.0288	-9.86422	-9.99153	-9.70976	-9.84899	-9.96261
b0053	surA	chr	-	53415,	54702,	-10.5279	-10.6252	-10.6514	-10.566	-10.5807	-10.5143	-10.71	-10.4651	-10.398	-10.6095	-10.5623	-10.5705
b0054	imp	chr	-	54754,	57109,	-10.8735	-10.9375	-11.1364	-10.9249	-11.0893	-11.059	-11.1687	-11.2057	-11.0175	-10.9951	-11.0216	-11.1583
b0055	djlA	chr	+	57363,	58179,	-13.2849	-13.2821	-13.3702	-13.1594	-12.9168	-13.337	-12.7842	-12.7542	-13.3395	-13.317	-13.0774	-12.8424
b0068	tbpA	chr	-	74496,	75480,	-13.9288	-14.2124	-14.0166	-14.6619	-14.9895	-14.7521	-14.9085	-15.1692	-17.7989	-14.0573	-14.8163	-15.2059
b0081	mraZ	chr	+	89633,	90092,	-11.1918	-10.9319	-11.001	-10.7046	-10.6067	-10.8388	-10.7743	-10.6625	-10.477	-11.0228	-10.6848	-10.6869
b0087	mraY	chr	+	96001,	97084,	-11.5889	-11.8214	-11.863	-11.9178	-11.8196	-11.9724	-11.8589	-11.9676	-12.1842	-11.7732	-11.8837	-11.9414
b0088	murD	chr	+	97086,	98403,	-11.4859	-11.5437	-11.4994	-11.6204	-11.5166	-11.7164	-11.8313	-12.0427	-11.551	-11.5111	-11.5912	-11.8561
b0091	murC	chr	+	100764,	102240,	-11.3845	-11.6229	-11.2609	-11.7679	-11.6235	-11.3552	-11.7069	-11.5923	-11.477	-11.4101	-11.6164	-11.6298
b0096	lpxC	chr	+	106556,	107474,	-8.45442	-8.42267	-8.54201	-8.64103	-8.6546	-8.65895	-8.61793	-8.68487	-8.66703	-8.47698	-8.65048	-8.64869
b0098	secA	chr	+	108278,	110984,	-10.0875	-9.94316	-9.93034	-10.079	-10.1196	-10.1751	-10.295	-10.2244	-10.5605	-9.97388	-10.1151	-10.3049
b0103	coaE	chr	-	112598,	113219,	-12.5596	-12.531	-12.849	-12.8006	-12.7922	-13.2327	-12.6455	-12.9062	-13.477	-12.6562	-12.871	-12.8355
b0119	yacL	chr	+	134387,	134750,	-14.4263	-15.1855	-14.3972	-14.1094	-14.6381	-14.8516	-14.5524	-14.3212	-14.0984	-14.6338	-14.4559	-14.3935
b0122	yacC	chr	-	136569,	136917,	-14.0219	-13.6924	-13.9353	-14.1094	-14.49	-13.7521	-14.3044	-14.1219	-14.477	-13.8668	-14.1803	-14.2597
b0133	panC	chr	-	147943,	148795,	-13.1918	-13.0335	-12.6988	-12.9249	-13.002	-13.0151	-12.9978	-13.1454	-13.4066	-12.9276	-12.9759	-13.104
b0134	panB	chr	-	148806,	149601,	-12.7324	-12.7704	-12.8213	-12.8964	-13.0273	-12.7282	-13.0288	-12.9886	-13.477	-12.7802	-12.9173	-13.0716
b0144	yadB	chr	-	159185,	160082,	-14.1214	-14.6549	-15.1709	-14.5688	-14.76	-14.2666	-14.267	-15.4911	-13.3395	-14.6594	-14.5828	-14.3736
b0150	fhuA	chr	+	167483,	169727,	-13.0543	-12.3781	-12.6173	-12.5915	-12.8702	-12.8776	-13.3235	-12.7542	-13.0984	-12.6244	-12.7637	-13.0636
b0156	yadR	chr	+	176609,	176954,	-12.3141	-12.5916	-12.1536	-12.5244	-12.3637	-12.4301	-12.8799	-12.5843	-12.9915	-12.3349	-12.4333	-12.7821
b0168	map	chr	-	188711,	189506,	-11.3948	-11.4207	-11.1885	-11.3939	-11.6043	-11.4593	-11.558	-11.4837	-11.6491	-11.3183	-11.4964	-11.5439
b0173	dxr	chr	+	193520,	194717,	-12.8273	-12.7704	-12.5937	-12.9541	-12.5437	-12.9865	-13.0929	-13.0317	-12.551	-12.7118	-12.7637	-12.9785
b0174	ispU	chr	+	194902,	195664,	-11.8555	-11.7212	-11.6905	-11.7874	-12.0337	-11.8645	-11.9524	-12.0208	-12.1265	-11.7422	-11.9068	-12.0012
b0175	cdsA	chr	+	195676,	196534,	-11.9439	-11.7067	-11.8122	-12.2834	-12.0083	-12.1354	-12.2395	-12.0874	-12.1265	-11.8067	-12.1279	-12.1668
b0199	metN	chr	-	221613,	222645,	-13.6809	-13.8959	-13.5252	-14.1765	-13.8933	-13.8516	-13.9377	-13.7542	-14.3395	-13.6854	-13.9814	-13.9196
b0223	yafJ	chr	+	244326,	245094,	-14.4263	-14.2124	-13.6173	-14.6146	-14.1196	-14.5715	-15.9674	-15.4911	-15.7989	-13.991	-14.3676	-15.7561
b0224	yafK	chr	-	245064,	245805,	-12.6189	-12.9978	-13.059	-13.2113	-13.5077	-13.1671	-13.5982	-13.0537	-13.3395	-12.9121	-13.3254	-13.3443
b0344	lacZ	chr	-	362454,	365529,	-11.9902	-12.0155	-11.9753	-10.7423	-10.7028	-10.7401	-10.8906	-10.5803	-10.381	-11.993	-10.7243	-10.6915
b0377	sbmA	chr	+	395862,	397083,	-14.3043	-14.5141	-14.6332	-14.8684	-15.2625	-14.337	-14.5524	-15.6167	-14.3395	-14.5009	-14.8965	-14.8086
b0378	yaiW	chr	+	397095,	398190,	-14.0543	-14.2399	-14.5401	-13.9838	-14.8031	-15.074	-14.5524	-14.3757	-15.477	-14.2968	-14.4866	-14.5862
b0401	brnQ	chr	+	418814,	420134,	-11.1001	-11.1075	-11.0972	-10.9504	-11.1196	-11.1751	-10.9674	-11.1277	-10.7114	-11.1015	-11.0658	-10.9804
b0409	secF	chr	+	428728,	429700,	-10.6683	-10.6207	-10.6555	-10.4551	-10.5644	-10.5875	-10.5052	-10.4215	-10.5043	-10.6466	-10.5279	-10.4747
b0418	pgpA	chr	+	435812,	436331,	-12.9439	-12.9517	-13.1251	-13.0452	-13.002	-12.9865	-12.7579	-13.2181	-13.2139	-13.0155	-13.0146	-12.971
b0420	dxs	chr	-	437538,	439401,	-11.3339	-11.6924	-11.6739	-11.7233	-11.3517	-11.6255	-11.7975	-11.9572	-11.4951	-11.5841	-11.5299	-11.8019
b0426	yajQ	chr	+	443906,	444398,	-11.3793	-11.4646	-11.5289	-11.3352	-11.3083	-11.4016	-11.2532	-11.1632	-11.4066	-11.4667	-11.3358	-11.2415
b0458	ylaC	chr	-	478004,	478475,	-12.5251	-12.6275	-12.6015	-12.6146	-12.6187	-12.801	-12.8109	-12.5843	-12.8447	-12.5902	-12.6508	-12.7306
b0460	hha	chr	-	479313,	479532,	-13.1387	-12.6275	-13.0062	-13.4395	-13.1893	-13.4495	-13.9674	-13.2688	-13.477	-12.8931	-13.3254	-13.6093
b0462	acrB	chr	-	480477,	483627,	-10.1301	-10.0608	-10.1464	-10.0472	-10.081	-10.1315	-10.0035	-10.0154	-9.99799	-10.1119	-10.0782	-10.0069
b0475	hemH	chr	+	497278,	498241,	-14.3043	-14.7704	-14.9958	-14.4813	-14.4212	-14.489	-14.7975	-14.5525	-13.2139	-14.7118	-14.4559	-14.354
b0525	ppiB	chr	-	553165,	553660,	-9.98433	-9.83313	-9.90351	-10.1217	-10.0498	-10.0891	-10.0848	-10.1935	-10.3313	-9.89878	-10.0833	-10.1572
b0543	emrE	chr	+	567537,	567870,	-11.739	-12.0577	-12.1364	-12.603	-12.6381	-12.6146	-12.4971	-12.4614	-13.551	-11.9971	-12.6206	-12.5977
b0565	ompT	chr	-	583902,	584856,	-10.3165	-10.2347	-10.3437	-10.8788	-10.6139	-10.7048	-10.9267	-10.7452	-11.0846	-10.2981	-10.7232	-10.8805
b0577	ybdG	chr	-	602638,	603886,	-13.7858	-13.4012	-13.6015	-13.6146	-13.9895	-13.6589	-13.8519	-13.7907	-13.629	-13.5719	-13.7779	-13.7953
b0605	ahpC	chr	+	638167,	638731,	-9.59043	-9.5872	-9.55145	-9.82734	-9.73637	-9.78858	-9.88348	-9.81637	-9.78208	-9.57381	-9.77905	-9.84406
b0607	uspG	chr	-	640661,	641090,	-13.7064	-14.0335	-13.6822	-13.6146	-14.0402	-14.5715	-14.0605	-13.6838	-14.7989	-13.8014	-13.949	-13.9936
b0611	rna	chr	-	643419,	644226,	-13.3438	-14.0096	-13.7501	-14.3209	-14.2625	-14.6589	-14.1261	-14.7542	-16.2139	-13.7118	-14.3534	-14.5191
b0640	holA	chr	-	669796,	670828,	-12.7456	-12.5566	-12.5705	-12.8409	-12.6676	-12.7282	-12.8244	-12.6838	-12.7545	-12.6088	-12.7404	-12.7625
b0657	lnt	chr	-	688565,	690104,	-11.7	-11.8851	-11.8583	-11.755	-11.8702	-11.9041	-12.0848	-11.9993	-11.6491	-11.8247	-11.8335	-11.9822
b0695	kdpD	chr	-	720952,	723637,	-13.0875	-12.9978	-13.1709	-12.7359	-12.6577	-13.2666	-12.9674	-13.0317	-12.3395	-13.0874	-12.7874	-12.8769
b0727	sucB	chr	+	760744,	761962,	-9.21799	-9.21242	-9.23787	-9.57445	-9.66884	-9.59555	-9.89594	-9.92129	-9.90407	-9.22386	-9.61959	-9.90613
b0728	sucC	chr	+	762236,	763403,	-9.83957	-9.93612	-9.90109	-10.1446	-10.3025	-10.1671	-11.0327	-10.7587	-10.966	-9.89688	-10.2168	-10.9196
b0729	sucD	chr	+	763402,	764272,	-10.115	-10.1011	-10.1139	-10.6351	-10.6978	-10.5609	-11.3875	-11.2244	-11.155	-10.1097	-10.6475	-11.292
b0736	ybgC	chr	+	773974,	774379,	-12.9592	-12.6549	-12.9254	-13.077	-13.0793	-13.1995	-13.0288	-13.1219	-13.4066	-12.8337	-13.101	-13.1122
b0740	tolB	chr	+	776962,	778255,	-10.1628	-10.3573	-10.1251	-10.1552	-10.2055	-10.2369	-10.0249	-10.0677	-10.0373	-10.2117	-10.1929	-10.0418
b0756	galM	chr	-	787019,	788060,	-11.5771	-11.6229	-11.7414	-12.0219	-11.8086	-11.7521	-12.2304	-12.2432	-12.629	-11.6562	-11.871	-12.2873
b0757	galK	chr	-	788053,	789202,	-12.7723	-12.4974	-12.5782	-12.8823	-12.708	-12.8776	-13.0132	-13.3482	-12.5894	-12.5964	-12.8018	-13.0477
b0762	ybhT	chr	+	793995,	794145,	-10.1344	-9.96736	-9.9242	-10.091	-10.1769	-10.0891	-10.4676	-10.5963	-10.9409	-9.991	-10.1279	-10.5748
b0833	yliE	chr	+	872201,	874550,	-12.9746	-12.6736	-12.9958	-13.302	-13.49	-12.9865	-13.8244	-13.4323	-13.9915	-12.8705	-13.3115	-13.6931
b0834	yliF	chr	+	874557,	875886,	-13.9288	-13.6924	-14.1027	-14.4813	-14.3881	-14.8516	-14.508	-14.0761	-15.477	-13.9045	-14.5022	-14.4342
b0853	ybjN	chr	+	892179,	892656,	-13.6809	-13.6366	-13.9552	-13.7615	-13.5256	-13.9585	-13.7195	-13.5215	-13.7114	-13.7663	-13.6859	-13.6446
b0884	infA	chr	-	925447,	925666,	-10.1562	-10.2857	-10.2486	-10.8173	-10.8307	-10.8908	-10.7195	-10.7907	-11.0846	-10.2367	-10.8372	-10.7936
b0892	rarA	chr	+	937216,	938560,	-13.7858	-13.1989	-13.2062	-13.6619	-13.6381	-13.489	-13.267	-13.9062	-14.0984	-13.3323	-13.6164	-13.5748
b0921	smtA	chr	+	972759,	973545,	-12.7324	-13.0949	-12.7852	-12.8139	-13.3557	-12.7282	-13.1261	-12.9886	-14.0984	-12.8705	-13.009	-13.1797
b0922	mukF	chr	+	973541,	974864,	-11.9064	-11.8529	-11.7942	-11.9106	-11.9168	-11.8908	-11.9303	-12.0317	-12.0984	-11.8429	-11.9094	-11.9898
b0928	aspC	chr	-	983741,	984932,	-11.8627	-12.1989	-11.7544	-11.9322	-12.1965	-11.7521	-12.0929	-11.9676	-12.2139	-11.9237	-12.0034	-12.0636
b0931	pncB	chr	-	988376,	989579,	-11.6189	-11.7456	-11.9205	-12.3114	-12.0993	-12.0442	-12.3429	-12.1935	-12.044	-11.7767	-12.1616	-12.2415
b0950	pqiA	chr	+	1011223,	1012477,	-13.1739	-12.8214	-12.9855	-12.8964	-13.0273	-13.0151	-12.8381	-12.5525	-12.3395	-12.9709	-12.9759	-12.6506
b0958	sulA	chr	-	1019632,	1020142,	-13.7858	-14.2679	-13.9753	-14.3594	-14.1196	-13.8516	-14.5982	-14.5525	-14.7989	-14.0155	-14.1431	-14.6093
b0969	yccK	chr	-	1029561,	1029891,	-13.8699	-14.1075	-13.8772	-14.7108	-14.0402	-14.489	-14.6944	-14.7542	-14.3395	-13.951	-14.3393	-14.6566
b0970	yccA	chr	-	1029981,	1030641,	-10.1584	-10.2434	-10.1464	-10.6263	-10.76	-10.6037	-10.6882	-10.6924	-10.8682	-10.1825	-10.6793	-10.7148
b0981	etk	chr	-	1041252,	1043433,	-14.3845	-13.9631	-14.6332	-14.5688	-14.49	-14.7521	-14.267	-14.7542	-14.9915	-14.3069	-14.5664	-14.5191
b1000	cbpA	chr	-	1062077,	1062998,	-14.1918	-14.4809	-14.6332	-15.0452	-14.0402	-14.9585	-15.0288	-14.9062	-14.9915	-14.4555	-14.5022	-14.9785
b1034	ycdX	chr	+	1098101,	1098839,	-13.4694	-13.6184	-13.3307	-13.7615	-13.7182	-13.8516	-14.0605	-13.8667	-13.892	-13.4611	-13.759	-13.9635
b1047	mdoC	chr	-	1107006,	1108164,	-13.9592	-14.0335	-14.1027	-15.0452	-15.0926	-15.074	-15.16	-15.4911	-16.2139	-14.0405	-15.0716	-15.3935
b1061	dinI	chr	-	1120464,	1120710,	-12.5025	-12.7604	-13.2547	-13.4395	-13.2182	-13.411	-13.2856	-13.4614	-13.3395	-12.8557	-13.3323	-13.354
b1111	ycfQ	chr	-	1167422,	1168055,	-14.0219	-13.9403	-14.0807	-14.2834	-14.5621	-14.489	-14.16	-14.4323	-14.9915	-14.0155	-14.4408	-14.354
b1127	pepT	chr	+	1185066,	1186293,	-13.3043	-13.2538	-13.3437	-13.1425	-13.0531	-13.1671	-12.7975	-13.01	-12.9915	-13.3018	-13.1069	-12.8981
b1129	phoQ	chr	-	1187538,	1188999,	-12.3239	-12.4485	-12.2547	-12.2927	-12.4297	-12.1354	-11.8589	-12.4911	-11.9162	-12.3375	-12.3184	-12.0636
b1139	lit	chr	+	1197917,	1198811,	-13.9288	-14.2965	-14.1027	-14.4813	-14.2328	-14.5715	-14.5524	-14.8282	-16.7989	-14.118	-14.3819	-14.8355
b1145	ymfK	chr	-	1201481,	1202156,	-12.1739	-12.2609	-12.1767	-12.1012	-12.1822	-12.3922	-12.1094	-12.5063	-12.307	-12.2046	-12.1897	-12.2688
b1198	dhaM	chr	-	1246918,	1248340,	-10.8133	-10.753	-10.8009	-11.5973	-11.6876	-11.6589	-11.8519	-11.9062	-12.4066	-10.7873	-11.6486	-11.9414
b1208	ispE	chr	-	1261248,	1262100,	-10.098	-9.94599	-10.1492	-9.80892	-9.85599	-9.8166	-9.88171	-9.70325	-9.51349	-10.0627	-9.83103	-9.75771
b1214	ychA	chr	+	1266542,	1267352,	-13.2284	-13.0335	-12.8213	-13.2113	-13.2182	-13.1995	-13.4649	-13.0537	-13.155	-12.991	-13.212	-13.2597
b1232	purU	chr	-	1287004,	1287847,	-13.3438	-13.1202	-13.3177	-13.3209	-13.7814	-13.6146	-13.3235	-13.7186	-14.477	-13.2524	-13.5664	-13.5862
b1233	ychJ	chr	-	1287896,	1288355,	-13.21	-13.7309	-13.7501	-13.4813	-13.4381	-13.9585	-13.8519	-13.6167	-14.3395	-13.5841	-13.542	-13.822
b1236	galU	chr	+	1290679,	1291588,	-11.2754	-11.4286	-11.4921	-11.644	-11.6726	-12.0007	-11.7776	-11.5923	-12.1265	-11.4115	-11.7197	-11.7529
b1242	ychE	chr	+	1297820,	1298468,	-14.0219	-14.2679	-13.8963	-14.5244	-14.7182	-14.7521	-14.9674	-14.7542	-14.477	-14.0489	-14.6508	-14.8086
b1243	oppA	chr	+	1299205,	1300837,	-9.52934	-9.65725	-9.67285	-9.86837	-9.91087	-9.87759	-10.1032	-10.0537	-10.155	-9.62911	-9.8888	-10.0928
b1244	oppB	chr	+	1300922,	1301843,	-10.9176	-10.8111	-11.0403	-11.3642	-11.2663	-11.4495	-11.6944	-11.3212	-11.477	-10.9256	-11.3358	-11.5191
b1248	yciU	chr	-	1304844,	1305174,	-13.0219	-13.4012	-12.8305	-13.2469	-13.2476	-13.3735	-13.6944	-13.4323	-13.9915	-13.0573	-13.2709	-13.6327
b1253	yciA	chr	-	1309871,	1310270,	-10.7757	-10.9152	-10.9627	-11.3304	-11.4466	-11.2411	-11.4917	-11.4541	-11.4951	-10.8959	-11.3622	-11.4786
b1267	yciO	chr	+	1322121,	1322742,	-13.1918	-13.7505	-13.7157	-13.8409	-13.8251	-14.0151	-13.9377	-13.7542	-14.9915	-13.5719	-13.8659	-13.9785
b1279	yciS	chr	+	1338266,	1338575,	-13.006	-13.07	-12.5859	-12.9106	-12.9168	-12.9041	-13.0766	-12.8093	-12.9915	-12.8447	-12.912	-12.9635
b1280	yciM	chr	+	1338581,	1339751,	-12.3845	-12.3858	-12.3242	-12.3889	-12.5166	-12.3922	-12.9825	-12.4323	-12.4413	-12.3608	-12.4446	-12.6808
b1323	tyrR	chr	+	1384743,	1386285,	-12.6189	-13.0824	-12.8122	-12.8546	-12.5529	-12.8261	-12.9377	-12.4762	-12.7545	-12.8447	-12.7084	-12.7306
b1324	tpx	chr	-	1386328,	1386835,	-10.7622	-10.7654	-10.542	-10.8718	-10.6356	-10.6874	-10.8519	-10.9886	-10.8447	-10.6723	-10.7277	-10.8981
b1356	racR	chr	-	1417788,	1418265,	-12.2284	-12.2538	-12.2425	-12.265	-12.1893	-12.411	-12.7579	-12.5843	-13.044	-12.2427	-12.2576	-12.7306
b1363	trkG	chr	+	1421805,	1423263,	-12.7858	-13.4325	-13.1478	-13.8139	-13.5807	-14.1995	-13.5982	-13.9468	-15.7989	-13.1313	-13.7684	-13.9052
b4493	gapC	chr	-	1487736,	1488737,	-13.0708	-13.0096	-12.8397	-13.265	-13.1471	-13.0151	-13.5524	-13.6498	-13.7989	-12.955	-13.1616	-13.6209
b1418	cybB	chr	+	1488925,	1489456,	-13.583	-13.4974	-13.6332	-13.5464	-13.6577	-13.6589	-14.2304	-13.5525	-13.629	-13.5719	-13.6164	-13.863
b1431	ydcL	chr	+	1500480,	1501149,	-13.8413	-13.9861	-13.9753	-14.1094	-13.9406	-14.1995	-14.6455	-14.9062	-14.629	-13.9432	-14.0485	-14.7306
b1453	ansP	chr	-	1522504,	1524004,	-14.4694	-15.0335	-14.0166	-14.3989	-14.3239	-14.5715	-14.267	-13.9468	-14.3395	-14.4223	-14.3964	-14.1541
b1531	marA	chr	+	1617597,	1617981,	-13.6558	-13.6736	-14.1027	-14.6146	-14.9406	-13.7521	-13.9377	-14.2181	-16.2139	-13.8229	-14.518	-14.2236
b1540	ydfH	chr	+	1626375,	1627062,	-13.7064	-13.3858	-13.1478	-13.8964	-14.0402	-13.5297	-13.8519	-13.9468	-15.477	-13.3582	-13.876	-14.0399
b4600	ydfJ	chr	-	1629025,	1650862,	-7.32703	-7.24511	-7.29003	-7.85327	-7.75409	-7.75733	-8.31934	-8.16322	-8.83599	-7.28364	-7.79008	-8.32445
b1550	gnsB	chr	-	1635632,	1635806,	-10.4748	-10.3201	-10.4126	-10.6234	-10.4318	-10.62	-11.2395	-11.1103	-11.8682	-10.3953	-10.5349	-11.2665
b1623	add	chr	+	1700256,	1701258,	-12.7995	-12.4891	-12.6822	-13.061	-12.8251	-13.5715	-13.3429	-13.7542	-13.0984	-12.6402	-13.0314	-13.4342
b1637	tyrS	chr	-	1713971,	1715246,	-11.2376	-11.1459	-11.1593	-11.1384	-11.3677	-11.1044	-11.2486	-11.1996	-11.4066	-11.1744	-11.2281	-11.2528
b1638	pdxH	chr	-	1715374,	1716031,	-14.2284	-13.9403	-14.2671	-14.5688	-14.49	-14.1354	-14.16	-14.1692	-15.477	-14.1358	-14.4408	-14.2967
b1650	nemA	chr	+	1724682,	1725780,	-14.5138	-14.6549	-14.4812	-14.5244	-14.8475	-14.411	-14.745	-15.3757	-14.7989	-14.5479	-14.6335	-14.9487
b1651	gloA	chr	+	1725860,	1726268,	-13.8133	-14.133	-13.5104	-13.8964	-13.739	-13.9041	-13.9978	-13.8667	-13.7114	-13.7802	-13.8261	-13.9052
b4602	ynhF	chr	-	1735479,	1735569,	-11.5365	-11.4012	-11.3602	-11.5632	-11.5256	-11.54	-11.7842	-11.6498	-11.7765	-11.4182	-11.542	-11.7337
b1677	lpp	chr	+	1755444,	1755681,	-3.41113	-3.39736	-3.38667	-3.27087	-3.26584	-3.27437	-3.07736	-3.10302	-3.16675	-3.39667	-3.26932	-3.09935
b1706	ydiU	chr	-	1787831,	1789268,	-13.1918	-13.6005	-13.8397	-13.5688	-13.7182	-13.5715	-14.3044	-13.9062	-14.629	-13.5659	-13.6335	-14.1884
b1740	nadE	chr	+	1820481,	1821309,	-13.6069	-13.6924	-13.7501	-13.4603	-13.8031	-13.8516	-13.745	-13.9468	-15.2139	-13.6919	-13.6771	-13.9635
b1764	selD	chr	-	1844988,	1846032,	-12.2849	-12.3037	-12.2425	-12.1594	-12.3318	-12.2496	-12.0525	-12.1336	-11.9162	-12.2744	-12.251	-12.0596
b1780	yeaD	chr	+	1861873,	1862758,	-13.247	-13.1855	-13.2425	-13.3209	-13.9168	-13.5715	-14.0929	-13.7907	-14.477	-13.2236	-13.6079	-14.0243
b1806	yeaY	chr	-	1887974,	1888556,	-13.1387	-13.311	-13.2182	-13.3989	-12.9286	-13.3014	-12.8244	-12.9264	-12.629	-13.2283	-13.1554	-12.8287
b1827	kdgR	chr	-	1907331,	1908123,	-12.6936	-12.5653	-12.2062	-12.1765	-12.3161	-12.5504	-12.4755	-12.4468	-12.0984	-12.4416	-12.3047	-12.4036
b1834	yebT	chr	+	1915533,	1918167,	-13.4263	-13.6005	-13.9552	-13.302	-13.8251	-13.489	-13.5751	-13.5525	-13.477	-13.6788	-13.5501	-13.5522
b1841	yobA	chr	-	1922618,	1922993,	-13.9288	-14.2679	-13.5552	-14.2113	-13.9895	-14.411	-14.5982	-14.0761	-14.7989	-13.8668	-14.1431	-14.4137
b1842	holE	chr	+	1923131,	1923362,	-14.3845	-14.133	-14.3437	-14.3989	-14.5621	-14.2666	-14.8519	-14.6167	-14.3395	-14.2769	-14.4408	-14.6808
b1847	yebF	chr	-	1928057,	1928414,	-13.8133	-14.2679	-14.4812	-14.2469	-14.6776	-14.0151	-15.2304	-14.3212	-14.9915	-14.2093	-14.3676	-14.8086
b1858	znuC	chr	+	1940685,	1941441,	-13.7324	-14.2679	-14.7675	-14.3209	-14.7182	-14.1995	-14.5982	-14.4323	-15.2139	-14.2671	-14.4559	-14.6093
b1861	ruvA	chr	-	1943388,	1944000,	-14.0543	-13.918	-13.6822	-13.8964	-13.8933	-13.7521	-13.8519	-13.6498	-13.4066	-13.852	-13.8659	-13.7055
b1908	yecA	chr	-	1988977,	1989643,	-14.4263	-14.2965	-14.1944	-14.0142	-14.3557	-14.1354	-13.9377	-14.3212	-13.7114	-14.2868	-14.1803	-14.0243
b1914	uvrY	chr	-	1992726,	1993383,	-11.4639	-11.5225	-11.4247	-11.492	-11.6139	-11.5715	-11.5189	-11.5215	-11.6904	-11.4681	-11.5602	-11.5439
b1923	fliC	chr	-	2000133,	2001630,	-13.1387	-13.4012	-13.1944	-13.3209	-13.5077	-13.8516	-13.5524	-13.1454	-14.2139	-13.2476	-13.4944	-13.4654
b1928	yedD	chr	-	2005700,	2006114,	-12.8555	-12.531	-12.6739	-12.8139	-12.5621	-12.5297	-12.6697	-12.5215	-11.8216	-12.6658	-12.6421	-12.4602
b1983	yeeN	chr	+	2054881,	2055598,	-11.5081	-11.6366	-11.7544	-12.1176	-11.76	-11.7763	-12.0848	-11.7363	-12.7989	-11.6466	-11.8837	-12.0282
b2016	yeeZ	chr	-	2086327,	2087152,	-13.6558	-14.2124	-14.0376	-14.1094	-13.8933	-14.1995	-14.5982	-14.2688	-14.629	-13.9829	-14.0258	-14.476
b2027	cld	chr	-	2095344,	2096325,	-9.4721	-9.61504	-9.44561	-10.0008	-9.83768	-9.89408	-10.0151	-9.90368	-10.0984	-9.50927	-9.9062	-9.98602
b2032	wbbK	chr	-	2101414,	2102533,	-12.4694	-12.6736	-12.7588	-12.7233	-12.6876	-12.801	-13.4026	-13.5215	-13.9915	-12.6498	-12.722	-13.5191
b2033	wbbJ	chr	-	2102517,	2103108,	-12.7995	-12.548	-12.8122	-12.9394	-12.9527	-13.6146	-13.1773	-13.0317	-13.629	-12.7118	-13.0542	-13.1797
b2034	wbbI	chr	-	2103088,	2104081,	-11.5422	-11.4646	-11.5667	-11.9838	-11.6776	-12.0442	-11.9524	-11.9781	-13.0984	-11.5242	-11.8509	-12.0837
b2035	rfc	chr	-	2104083,	2105250,	-11.7129	-11.9069	-11.6413	-12.1851	-11.9109	-12.0296	-12.7322	-12.6332	-14.629	-11.7473	-12.0286	-12.8561
b2037	rfbX	chr	-	2106360,	2107608,	-11.6496	-11.409	-11.6657	-12.3496	-12.021	-12.0296	-12.4026	-12.5063	-13.3395	-11.5674	-12.134	-12.5466
b2065	dcd	chr	-	2139657,	2140239,	-11.7995	-11.9746	-11.7675	-11.2559	-11.4171	-11.3828	-11.3925	-11.3966	-11.1265	-11.8447	-11.3498	-11.3516
b4498	gatR	chr	-	2167716,	2169751,	-13.0708	-13.7115	-13.2182	-13.6146	-13.0273	-13.4495	-13.5751	-13.6167	-13.551	-13.3272	-13.2979	-13.5862
b2107	yohN	chr	+	2184981,	2185320,	-12.8555	-12.7115	-12.7414	-12.6619	-12.7286	-12.9585	-12.9674	-12.7011	-12.7114	-12.7594	-12.745	-12.8287
b2124	yehS	chr	-	2209747,	2210218,	-13.9902	-14.159	-13.6822	-14.4813	-13.739	-14.0151	-13.7975	-14.5525	-14.2139	-13.9121	-14.0258	-14.0877
b2134	pbpG	chr	-	2221959,	2222892,	-14.6069	-14.2124	-14.059	-14.4395	-14.3557	-14.337	-14.745	-14.9886	-14.9915	-14.2379	-14.3819	-14.863
b2153	folE	chr	-	2241005,	2241674,	-13.1387	-13.159	-13.1478	-13.1259	-13.49	-13.2666	-13.3044	-13.5215	-13.2753	-13.1493	-13.3047	-13.3736
b2157	yeiE	chr	-	2246758,	2247640,	-13.7589	-14.0335	-13.4812	-13.7615	-14.1196	-13.6589	-14.3824	-14.3757	-13.2753	-13.7253	-13.8862	-14.1541
b2159	nfo	chr	+	2248861,	2249719,	-13.8133	-14.3858	-14.9156	-14.1425	-14.8475	-14.1995	-14.6944	-14.4911	-14.477	-14.3793	-14.4259	-14.5862
b2216	rcsD	chr	+	2311509,	2314182,	-11.6872	-11.5141	-11.5104	-11.6499	-11.5901	-11.6366	-11.7515	-11.9062	-12.307	-11.5553	-11.6206	-11.8769
b2240	glpT	chr	-	2349037,	2350396,	-9.03297	-9.11062	-9.14781	-8.92135	-8.93761	-8.9447	-8.87464	-8.92129	-8.78487	-9.10452	-8.93303	-8.87739
b2280	nuoJ	chr	-	2393363,	2393918,	-11.1001	-11.2158	-11.0725	-11.5244	-11.8141	-11.6366	-11.7258	-11.7098	-11.7328	-11.128	-11.6682	-11.7211
b2281	nuoI	chr	-	2393929,	2394472,	-11.5194	-11.4768	-11.3803	-11.8964	-11.9771	-12.1044	-12.0525	-12.6004	-11.8216	-11.4485	-11.9705	-12.1841
b2282	nuoH	chr	-	2394486,	2395464,	-10.4105	-10.5288	-10.2092	-10.5108	-10.7105	-10.6646	-10.923	-11.0046	-10.8216	-10.3654	-10.626	-10.9359
b2283	nuoG	chr	-	2395460,	2398187,	-8.90366	-9.01331	-8.87184	-9.15306	-9.1893	-9.05903	-9.44776	-9.42327	-9.28714	-8.92782	-9.15004	-9.41434
b2284	nuoF	chr	-	2398239,	2399577,	-10.5393	-10.7163	-10.5859	-10.7296	-10.7312	-10.7581	-11.244	-11.0154	-10.8102	-10.6173	-10.7358	-11.0897
b2285	nuoE	chr	-	2399573,	2400074,	-11.6372	-11.3973	-11.2985	-11.5576	-11.5256	-11.54	-11.9599	-11.8	-11.7328	-11.4142	-11.54	-11.8665
b2293	yfbT	chr	-	2409460,	2410111,	-13.4263	-13.2399	-13.1826	-13.1594	-13.0402	-13.0151	-13.53	-13.1219	-12.477	-13.2622	-13.0774	-13.1797
b2299	yfcD	chr	-	2416655,	2417198,	-12.8273	-13.3858	-12.7675	-12.8964	-13.0793	-12.801	-13.0288	-12.7186	-12.9409	-12.9709	-12.9543	-12.8981
b2304	yfcH	chr	+	2419729,	2420623,	-12.4263	-12.3934	-12.5477	-12.1679	-12.4466	-12.2839	-12.1948	-12.5525	-11.9915	-12.4611	-12.3081	-12.278
b2314	dedD	chr	-	2429043,	2429706,	-12.7589	-12.6924	-12.849	-12.3594	-12.6091	-12.9041	-12.4334	-12.5843	-12.5135	-12.7698	-12.5623	-12.4974
b2316	accD	chr	-	2431033,	2431948,	-9.67929	-9.62633	-9.66771	-9.70153	-9.67009	-9.60638	-9.77593	-9.80465	-9.67477	-9.65616	-9.66879	-9.77066
b2320	pdxB	chr	-	2434736,	2435873,	-12.0625	-12.233	-12.1421	-12.2834	-12.2476	-11.8776	-12.0766	-12.0874	-11.966	-12.1516	-12.1803	-12.0636
b2330	prmB	chr	-	2445529,	2446462,	-12.6189	-12.3934	-12.1195	-12.5576	-12.49	-12.1832	-12.3235	-12.1572	-12.7989	-12.3297	-12.4484	-12.3203
b2331	yfcN	chr	+	2446627,	2447179,	-13.5365	-13.8529	-14.2182	-13.6862	-13.8933	-13.7521	-13.5751	-13.6167	-12.9409	-13.8893	-13.7874	-13.476
b2350	yfdG	chr	+	2465876,	2466239,	-12.1739	-11.9403	-12.001	-12.4191	-12.3161	-12.3735	-12.4026	-12.5063	-12.5135	-12.0217	-12.364	-12.4549
b2351	yfdH	chr	+	2466235,	2467156,	-10.9669	-11.133	-11.0536	-11.794	-11.6381	-11.7164	-12.0605	-11.8473	-12.4413	-11.0573	-11.7084	-12.0282
b2352	yfdI	chr	+	2467152,	2468484,	-9.55811	-9.50467	-9.61137	-10.6529	-10.3437	-10.5348	-10.5982	-10.5683	-11.7545	-9.55984	-10.4866	-10.7086
b2381	ypdB	chr	+	2498404,	2499139,	-14.5596	-14.3256	-14.8032	-14.1094	-14.3557	-14.5715	-14.2304	-14.5525	-13.7989	-14.5598	-14.2979	-14.2597
b2410	yfeH	chr	+	2524967,	2525966,	-14.0875	-14.3554	-13.8032	-13.8964	-14.1196	-13.9585	-13.53	-14.0761	-14.2139	-14.0489	-14.0034	-13.7953
b2417	crr	chr	+	2533855,	2534365,	-10.2446	-10.2295	-10.2033	-10.3765	-10.2739	-10.2581	-10.3163	-10.3246	-10.9041	-10.223	-10.3073	-10.3923
b2434	ypeA	chr	-	2549734,	2550160,	-14.4694	-14.2679	-14.2922	-13.9838	-14.0146	-14.489	-14.5524	-13.7907	-14.0984	-14.3272	-14.0833	-14.1711
b2435	amiA	chr	+	2550373,	2551243,	-13.2284	-13.0455	-12.9652	-13.1938	-13.2625	-13.337	-13.4026	-13.1935	-13.551	-13.0573	-13.251	-13.3443
b4606	ypfM	chr	-	2588828,	2588888,	-11.2994	-11.2124	-11.4812	-11.3496	-11.5211	-11.6703	-11.5467	-11.2882	-12.2139	-11.3362	-11.4828	-11.5245
b2472	dapE	chr	+	2589628,	2590756,	-13.0219	-13.0215	-13.0271	-13.302	-13.0661	-12.9041	-13.6216	-13.2688	-12.6696	-13.0238	-13.1129	-13.3155
b2475	ypfJ	chr	-	2593895,	2594759,	-13.6809	-13.8318	-13.4247	-13.1765	-13.0661	-13.801	-13.4026	-13.1454	-13.2753	-13.6212	-13.2249	-13.2873
b2478	dapA	chr	-	2596903,	2597782,	-11.0791	-10.8689	-10.9477	-11.0531	-10.9989	-10.8974	-10.8729	-10.9062	-11.2139	-10.952	-10.9979	-10.9305
b2480	bcp	chr	+	2598499,	2598970,	-12.4694	-12.1138	-11.863	-12.2469	-12.3963	-12.3191	-12.2395	-12.5843	-12.551	-12.0874	-12.3254	-12.3985
b2495	yfgD	chr	+	2615599,	2615959,	-13.5138	-13.5828	-13.4527	-13.34	-13.5621	-13.5297	-13.5524	-13.7907	-12.7989	-13.5125	-13.4712	-13.4866
b2523	pepB	chr	-	2653096,	2654380,	-12.5138	-12.3479	-12.3569	-12.1765	-12.3083	-12.1354	-12.1948	-12.0649	-12.0984	-12.3926	-12.2249	-12.133
b2525	fdx	chr	-	2654769,	2655105,	-13.4263	-13.9861	-14.3972	-14.1765	-14.5256	-14.337	-14.508	-14.0761	-14.629	-13.951	-14.3534	-14.354
b2531	iscR	chr	-	2659664,	2660153,	-13.2658	-13.5141	-13.3049	-13.5915	-13.9168	-13.4495	-14.4231	-14.3757	-14.477	-13.3634	-13.6949	-14.4137
b2554	yfhA	chr	-	2685490,	2686825,	-13.7064	-13.9631	-13.6822	-13.6862	-13.7814	-14.5715	-13.9978	-14.2181	-13.9915	-13.7802	-13.8659	-14.0716
b2568	lepB	chr	-	2702356,	2703331,	-11.583	-11.7505	-11.3938	-9.3448	-9.41497	-9.40628	-9.29262	-9.33802	-9.27925	-11.5583	-9.38735	-9.30665
b2580	ung	chr	+	2714775,	2715465,	-14.2658	-14.0824	-14.6657	-14.8684	-13.8031	-13.9585	-14.0288	-14.2688	-13.4066	-14.3375	-14.1431	-13.9936
b2585	pssA	chr	+	2720748,	2722104,	-11.6746	-11.5099	-11.5289	-11.6204	-11.6283	-11.6589	-11.8109	-11.7274	-12.0175	-11.5583	-11.6313	-11.8086
b2592	clpB	chr	-	2729621,	2732195,	-7.57823	-7.59827	-7.59688	-7.86058	-7.78512	-7.85079	-7.7278	-7.7396	-8.15864	-7.59252	-7.82489	-7.78805
b2593	yfiH	chr	-	2732324,	2733056,	-13.9902	-14.1855	-14.3437	-13.9838	-14.5996	-13.6146	-13.5982	-13.9468	-13.7989	-14.1906	-14.131	-13.7433
b2594	rluD	chr	-	2733052,	2734033,	-13.364	-12.4974	-13.1593	-13.1425	-13.2476	-12.9585	-13.3625	-13.2432	-12.892	-12.9354	-13.1493	-13.2415
b2595	yfiO	chr	+	2734167,	2734905,	-10.7689	-10.7881	-10.9677	-10.999	-10.9497	-11.059	-11.1094	-10.8912	-11.1695	-10.8511	-10.9882	-11.036
b2616	recN	chr	+	2749816,	2751478,	-13.247	-13.4974	-13.3307	-13.7874	-13.5996	-13.2327	-13.4649	-14.1692	-13.477	-13.3634	-13.5828	-13.6808
b2617	smpA	chr	+	2751626,	2751968,	-12.21	-12.0275	-12.1709	-12.0531	-12.1401	-12.337	-12.53	-12.0208	-12.1842	-12.1291	-12.1431	-12.278
b2630	rnlA	chr	+	2763939,	2765013,	-11.6936	-11.7555	-11.6332	-12.1851	-11.9958	-12.1044	-12.1094	-12.537	-12.7989	-11.6903	-12.0833	-12.3394
b2703	srlE	chr	+	2824413,	2825373,	-12.3141	-12.133	-12.4669	-12.9249	-12.8031	-13.2327	-13.6697	-13.4323	-13.3395	-12.3043	-12.9225	-13.53
b2729	hypD	chr	+	2850157,	2851279,	-14.7064	-14.4485	-15.6657	-14.3989	-14.6776	-14.5715	-14.9085	-14.2688	-14.2139	-14.8969	-14.5501	-14.5411
b2745	truD	chr	-	2868276,	2869326,	-12.006	-12.0155	-12.001	-11.6088	-11.6676	-11.7886	-11.6944	-11.7274	-11.4951	-12.0073	-11.6682	-11.6747
b2748	ftsB	chr	-	2870530,	2870842,	-12.5365	-12.7309	-12.3503	-12.674	-12.5807	-12.5504	-12.8109	-12.8667	-13.477	-12.5213	-12.6079	-12.9124
b2781	mazG	chr	-	2907915,	2908707,	-13.9592	-14.3858	-14.4247	-14.077	-14.5996	-14.489	-14.3429	-14.4911	-15.2139	-14.2769	-14.3676	-14.4974
b2794	queF	chr	+	2923369,	2924218,	-14.4694	-14.1855	-14.1251	-14.6146	-14.2625	-14.0151	-14.267	-14.4911	-14.7989	-14.2283	-14.3254	-14.4137
b2808	gcvA	chr	-	2939671,	2940589,	-14.9902	-13.7704	-14.8397	-15.1094	-14.6776	-14.1354	-15.0929	-15.7542	-15.7989	-14.4006	-14.6859	-15.3935
b2811	csdE	chr	+	2942563,	2943007,	-13.8699	-13.9403	-13.8032	-13.5915	-13.9649	-13.9585	-13.745	-13.7542	-13.3395	-13.8668	-13.8163	-13.6808
b2813	mltA	chr	-	2944102,	2945200,	-12.1129	-12.2399	-12.1307	-12.1259	-12.0661	-12.1044	-12.1261	-12.2817	-11.8447	-12.163	-12.0951	-12.133
b2820	recB	chr	-	2950482,	2954025,	-12.6311	-12.9978	-12.9353	-13.1938	-13.4725	-13.411	-13.2486	-13.6167	-13.4066	-12.8705	-13.3534	-13.3935
b2829	ptsP	chr	-	2964209,	2966456,	-11.9824	-11.8059	-11.72	-12.2559	-12.1196	-12.0007	-12.1687	-12.1454	-12.5135	-11.8139	-12.1431	-12.2059
b2845	yqeG	chr	+	2983868,	2985098,	-12.1214	-12.5653	-11.9652	-12.5027	-12.2109	-12.6589	-12.7069	-12.5683	-12.8447	-12.1906	-12.3928	-12.6747
b2892	recJ	chr	-	3034394,	3036128,	-12.6069	-12.6457	-12.5552	-12.4395	-12.5166	-12.5297	-12.3625	-12.4179	-12.1842	-12.5995	-12.4905	-12.354
b2893	dsbC	chr	-	3036133,	3036844,	-13.7589	-13.9631	-13.8583	-13.6862	-13.739	-13.3735	-13.4026	-13.7542	-13.551	-13.8668	-13.6421	-13.5411
b2894	xerD	chr	-	3036868,	3037765,	-13.4052	-13.5141	-14.0376	-13.6862	-13.0926	-13.489	-13.1948	-13.0317	-12.7989	-13.6658	-13.3605	-13.0716
b2897	ygfY	chr	-	3038825,	3039092,	-13.247	-12.7805	-13.1593	-13.3209	-13.49	-13.1354	-13.6216	-13.1219	-14.2139	-13.0363	-13.3534	-13.4866
b2900	yqfB	chr	-	3041333,	3041645,	-14.5138	-14.2965	-14.6988	-14.8139	-14.4212	-15.6589	-15.3044	-14.8282	-16.7989	-14.5009	-14.7404	-15.2415
b2903	gcvP	chr	-	3044189,	3047063,	-10.226	-10.2911	-10.2625	-10.3496	-10.5099	-10.2538	-10.8799	-11.0593	-10.7989	-10.2628	-10.3983	-10.9286
b2904	gcvH	chr	-	3047181,	3047571,	-10.6746	-10.4912	-10.5879	-10.6984	-10.6552	-10.5715	-11.0929	-11.2244	-10.9409	-10.5749	-10.654	-11.1143
b2906	visC	chr	-	3049136,	3050339,	-13.6809	-13.6736	-14.0376	-13.2834	-13.5996	-13.489	-13.3429	-13.2432	-13.2139	-13.8085	-13.4559	-13.2873
b2946	rsmE	chr	+	3089155,	3089887,	-13.7064	-13.6924	-13.6494	-13.8409	-13.3718	-13.4495	-13.1773	-13.3482	-13.4066	-13.6788	-13.542	-13.2688
b2947	gshB	chr	+	3089899,	3090850,	-13.1739	-13.1855	-13.4527	-13.4395	-13.3083	-13.337	-13.6216	-13.7186	-13.629	-13.2819	-13.3605	-13.6566
b2951	yggS	chr	+	3093119,	3093824,	-13.4052	-13.5653	-13.4386	-13.9838	-13.9168	-13.801	-14.0929	-14.1219	-13.7114	-13.4724	-13.9173	-14.0399
b2954	rdgB	chr	+	3094702,	3095296,	-13.6311	-13.5141	-13.4669	-13.379	-14.0661	-13.1044	-13.2304	-13.6498	-13.4066	-13.5242	-13.5746	-13.3935
b2955	yggW	chr	+	3095288,	3096425,	-13.21	-13.311	-13.5552	-12.9249	-13.2037	-12.8261	-13.2125	-12.5843	-12.7989	-13.374	-13.0202	-12.8981
b2958	yggN	chr	-	3098925,	3099645,	-14.2658	-14.133	-13.8032	-14.2113	-13.8933	-14.0151	-13.8519	-13.7907	-13.892	-14.0238	-14.0258	-13.8355
b2961	mutY	chr	+	3101034,	3102087,	-13.6069	-13.1075	-13.3437	-13.8139	-12.905	-13.7048	-13.53	-13.5525	-13.9915	-13.317	-13.3254	-13.5977
b2965	speC	chr	-	3105041,	3107177,	-13.4914	-14.1075	-13.6988	-13.9838	-13.9168	-13.7521	-13.3824	-14.3757	-14.0984	-13.7663	-13.9068	-13.769
b2976	glcB	chr	-	3119655,	3121827,	-14.2284	-15.0335	-14.6988	-14.7108	-14.5996	-14.6589	-15.16	-14.9062	-15.7989	-14.6594	-14.6508	-15.1372
b2988	gsp	chr	-	3134684,	3136544,	-14.0875	-13.5141	-13.4386	-13.265	-14.2625	-13.801	-13.4649	-13.9886	-14.0984	-13.6088	-13.7404	-13.718
b2994	hybC	chr	-	3139307,	3141011,	-13.8991	-13.3256	-12.9353	-13.1425	-13.3083	-13.411	-13.0605	-13.1219	-13.2139	-13.272	-13.2642	-13.104
b2995	hybB	chr	-	3141007,	3142186,	-15.1918	-14.6549	-15.4812	-14.3594	-14.2328	-14.9585	-13.8799	-14.4911	-14.3395	-15.0744	-14.3964	-14.1372
b2997	hybO	chr	-	3143164,	3144283,	-14.1562	-14.4485	-14.1944	-14.077	-14.3557	-13.489	-13.1948	-13.1692	-13.0984	-14.2671	-14.0485	-13.1711
b3002	yqhA	chr	-	3146998,	3147493,	-13.0875	-12.918	-12.8583	-12.9249	-12.8363	-13.1044	-12.9978	-12.7186	-13.4066	-12.9354	-12.9173	-12.9414
b3005	exbD	chr	-	3148839,	3149265,	-13.583	-13.6366	-13.8772	-14.1425	-14.0146	-13.801	-14.508	-14.4323	-15.2139	-13.7118	-14.0146	-14.5634
b3018	plsC	chr	-	3160765,	3161503,	-13.8413	-13.7115	-13.4957	-14.0142	-13.4381	-14.1354	-14.3044	-14.0761	-13.7989	-13.653	-13.7497	-14.1372
b3019	parC	chr	-	3161736,	3163995,	-11.4369	-11.159	-11.1393	-11.1094	-11.0993	-11.059	-11.0171	-11.0046	-10.88	-11.2176	-11.0951	-10.9917
b3034	nudF	chr	-	3175302,	3175932,	-15.0543	-14.0824	-14.2182	-14.5688	-14.9406	-14.337	-14.8519	-14.8282	-15.477	-14.3375	-14.6682	-14.9196
b3038	ygiC	chr	+	3178442,	3179603,	-12.364	-12.4246	-12.6173	-12.6381	-12.3881	-12.6817	-12.7842	-12.6332	-12.9409	-12.4809	-12.5299	-12.7497
b3058	folB	chr	-	3202242,	3202611,	-13.9902	-13.8111	-14.0376	-13.9541	-14.2625	-13.489	-13.8799	-13.5843	-13.892	-13.9432	-13.9705	-13.769
b3075	ebgR	chr	+	3219487,	3220471,	-14.5596	-14.5141	-14.5401	-14.4813	-14.9406	-14.7521	-14.9674	-14.4911	-14.7989	-14.536	-14.722	-14.7561
b3147	yraM	chr	+	3291421,	3293458,	-12.5712	-12.4809	-12.3437	-12.3594	-12.5437	-12.3735	-12.3925	-12.4762	-12.2443	-12.4471	-12.4408	-12.3985
b3150	yraP	chr	+	3294430,	3295006,	-13.4052	-13.2679	-13.8963	-12.7486	-13.5621	-13.074	-13.3044	-13.1219	-12.6696	-13.5242	-13.1249	-13.1288
b3166	truB	chr	-	3309854,	3310799,	-12.4803	-12.6549	-12.5705	-12.674	-12.6776	-12.5092	-12.6944	-12.8473	-12.892	-12.5749	-12.6421	-12.7755
b3193	yrbD	chr	-	3335931,	3336483,	-13.2658	-13.2124	-13.1027	-13.265	-13.4046	-13.3014	-13.3625	-13.3757	-14.0984	-13.1813	-13.3323	-13.4549
b3194	yrbE	chr	-	3336487,	3337270,	-12.7723	-12.3934	-12.5859	-12.6862	-12.7922	-12.5929	-12.7069	-12.5683	-13.155	-12.5598	-12.7129	-12.7117
b3197	kdsD	chr	+	3339287,	3340274,	-12.9592	-12.918	-12.5326	-13.302	-13.0661	-12.8516	-13.3429	-13.2948	-12.8447	-12.7628	-13.101	-13.2415
b3203	hpf	chr	+	3344194,	3344482,	-13.4477	-13.6736	-13.3702	-13.4395	-13.8475	-13.9041	-13.9085	-13.9886	-14.3395	-13.4895	-13.6949	-13.9936
b3204	ptsN	chr	+	3344599,	3345091,	-13.7858	-13.3705	-13.2425	-13.6619	-13.6577	-13.6589	-13.745	-14.6167	-13.892	-13.4115	-13.6595	-14.0243
b3210	arcB	chr	-	3348710,	3351047,	-12.0875	-12.1722	-11.9011	-12.0452	-11.9346	-12.0442	-12.0055	-12.2181	-11.477	-12.0384	-11.9951	-11.9822
b3212	gltB	chr	+	3352653,	3357207,	-12.6189	-12.9746	-12.6575	-12.7486	-12.76	-13.2327	-12.9377	-13.2432	-12.9409	-12.7491	-12.836	-13.0399
b3213	gltD	chr	+	3357219,	3358638,	-14.0875	-14.0335	-13.9753	-14.2469	-14.1471	-13.9585	-14.508	-14.3757	-14.7989	-14.0238	-14.1431	-14.4974
b3237	argR	chr	+	3382724,	3383195,	-12.6434	-12.5057	-12.3569	-12.5576	-12.6978	-12.6589	-12.508	-12.6667	-12.8447	-12.478	-12.6378	-12.6093
b3238	yhcN	chr	+	3383559,	3383823,	-12.3339	-12.531	-12.1139	-12.8139	-12.905	-12.5715	-13.1261	-13.0317	-14.0984	-12.3043	-12.8018	-13.1971
b3248	yhdE	chr	-	3395806,	3396400,	-13.038	-12.8318	-12.6988	-12.3304	-12.6577	-12.5092	-12.5866	-12.8282	-12.071	-12.8265	-12.5022	-12.5748
b3291	mscL	chr	+	3436045,	3436456,	-13.4052	-12.8959	-13.1027	-12.9394	-13.2625	-13.3735	-13.53	-13.4911	-13.9915	-13.096	-13.1554	-13.5748
b3312	rpmC	chr	-	3446589,	3446781,	-9.57712	-9.71634	-9.63124	-9.52989	-9.66015	-9.66459	-9.308	-9.30132	-9.28714	-9.64576	-9.61216	-9.30253
b3347	fkpA	chr	-	3474628,	3475441,	-11.1784	-11.233	-11.1421	-11.1679	-11.0241	-11.3014	-11.0807	-11.0046	-11.2911	-11.1825	-11.1264	-11.0817
b3349	slyD	chr	-	3475928,	3476519,	-9.35263	-9.36954	-9.31774	-9.24463	-9.27481	-9.33477	-9.06754	-9.15874	-8.91319	-9.34455	-9.27508	-9.07511
b3352	yheS	chr	+	3479310,	3481224,	-13.1918	-12.9631	-13.0698	-12.9838	-12.8588	-12.8776	-12.7975	-13.2181	-12.5135	-13.0616	-12.9068	-12.884
b3384	trpS	chr	-	3510655,	3511660,	-10.9669	-11.1524	-10.9881	-10.9876	-10.9926	-10.871	-10.8313	-10.7815	-10.7655	-11.0373	-10.9664	-10.8036
b3387	dam	chr	-	3513098,	3513935,	-12.165	-12.6005	-12.3113	-12.6862	-12.5346	-12.3735	-12.6098	-12.6004	-12.5135	-12.3634	-12.5541	-12.5919
b3407	yhgF	chr	+	3535406,	3537728,	-12.2009	-12.1722	-12.1709	-12.1765	-12.1751	-12.059	-12.0685	-12.1454	-11.4413	-12.179	-12.1523	-11.9822
b3425	glpE	chr	-	3559519,	3559846,	-14.6558	-13.159	-14.3972	-14.1094	-13.76	-14.0151	-13.5982	-13.5525	-14.2139	-13.8818	-13.9278	-13.6566
b3465	rsmD	chr	+	3602415,	3603012,	-14.5596	-14.1855	-14.9156	-14.4813	-14.3557	-14.6589	-14.2304	-14.7542	-14.2139	-14.536	-14.4559	-14.3935
b3469	zntA	chr	+	3604473,	3606672,	-12.8699	-12.918	-12.5552	-12.6499	-12.3718	-12.6146	-12.3429	-12.5063	-12.2139	-12.7525	-12.514	-12.3786
b3553	ghrB	chr	+	3715332,	3716307,	-13.1387	-13.1075	-13.5705	-12.9394	-13.6381	-13.8516	-13.5982	-13.6838	-13.2753	-13.2819	-13.3747	-13.5748
b3556	cspA	chr	+	3718071,	3718284,	-9.92692	-9.80849	-10.051	-10.6351	-10.7922	-11.1913	-10.8042	-10.9728	-11.5701	-9.93097	-10.7994	-10.9561
b3574	yiaJ	chr	-	3739706,	3740555,	-13.8699	-13.2538	-13.5401	-13.8684	-13.76	-14.0151	-13.8799	-13.6498	-14.2139	-13.5067	-13.8459	-13.8355
b3590	selB	chr	-	3756039,	3757884,	-12.3948	-12.2821	-12.3503	-12.1851	-12.2929	-12.4301	-12.143	-12.0761	-12.3726	-12.3375	-12.2776	-12.1498
b3591	selA	chr	-	3757880,	3759272,	-13.8991	-13.8318	-14.6332	-13.8139	-13.739	-14.074	-13.508	-13.9062	-13.551	-14.118	-13.8261	-13.6446
b3611	yibN	chr	-	3782606,	3783038,	-11.7064	-11.6503	-11.7588	-11.6499	-11.6577	-11.7641	-11.5411	-11.5604	-11.9162	-11.7068	-11.6749	-11.5977
b3614	yibQ	chr	+	3786123,	3787083,	-14.0543	-13.7115	-13.5104	-13.8684	-13.9406	-13.8516	-13.8799	-14.6167	-13.551	-13.7052	-13.8965	-14.0399
b3618	htrL	chr	-	3790848,	3791706,	-12.8273	-12.0949	-12.3702	-12.9106	-12.8031	-12.9585	-13.3044	-13.0317	-14.3395	-12.3661	-12.871	-13.3061
b3621	rfaC	chr	+	3794001,	3794961,	-13.1918	-13.5653	-12.9652	-13.5027	-13.7182	-13.2327	-13.4863	-13.4911	-14.0984	-13.2093	-13.5339	-13.5634
b3622	rfaL	chr	+	3794970,	3796230,	-11.6129	-11.6642	-11.5178	-12.0066	-11.8196	-11.7282	-12.5524	-12.1692	-13.0984	-11.5918	-11.8659	-12.4654
b3624	rfaZ	chr	-	3797367,	3798219,	-13.5138	-13.7704	-13.9353	-14.1765	-13.5996	-13.6146	-14.1261	-14.9886	-15.2139	-13.7594	-13.7874	-14.5191
b3630	rfaP	chr	-	3803175,	3803973,	-13.7064	-13.6736	-14.1709	-14.4813	-14.1471	-14.411	-14.6944	-14.6167	-14.2139	-13.8594	-14.3115	-14.5862
b3631	rfaG	chr	-	3803965,	3805090,	-14.2658	-13.4485	-13.8397	-14.2469	-14.5256	-13.9585	-14.745	-14.2181	-14.477	-13.7802	-14.2979	-14.4974
b3632	rfaQ	chr	-	3805086,	3806121,	-13.7064	-13.2124	-13.1944	-13.3209	-13.739	-13.5297	-13.9085	-13.4323	-14.3395	-13.317	-13.5339	-13.769
b3653	gltS	chr	-	3825482,	3826688,	-12.8133	-12.8851	-13.1709	-12.5576	-13.1751	-12.7282	-12.8381	-12.9468	-12.3395	-12.9709	-12.836	-12.7887
b3660	yicL	chr	+	3836270,	3837194,	-14.8699	-14.8111	-14.3177	-14.7615	-14.5996	-14.7521	-14.5982	-15.1692	-14.629	-14.6088	-14.6859	-14.7821
b3671	ilvB	chr	-	3849118,	3850807,	-11.7656	-11.6689	-11.9804	-11.4708	-11.4466	-11.54	-11.4649	-11.5763	-10.9409	-11.8103	-11.4731	-11.4112
b3697	yidA	chr	-	3874162,	3874975,	-14.0543	-13.4325	-13.3972	-13.8964	-13.6381	-14.074	-13.8519	-13.6838	-14.2139	-13.5538	-13.8066	-13.8355
b3746	ravA	chr	-	3927619,	3929116,	-14.7589	-14.6924	-14.0166	-14.7108	-14.5996	-14.074	-14.267	-14.3212	-13.9915	-14.4006	-14.518	-14.2415
b3774	ilvC	chr	+	3955992,	3957468,	-14.1918	-14.133	-13.7157	-13.8964	-13.6577	-13.9041	-13.1948	-13.4037	-13.2753	-13.9669	-13.7874	-13.278
b3779	gpp	chr	-	3960767,	3962252,	-12.5596	-12.548	-12.3437	-12.4395	-12.4638	-12.4495	-12.4755	-12.5683	-12.2753	-12.4667	-12.4521	-12.476
b3780	rhlB	chr	-	3962387,	3963653,	-11.2706	-11.4012	-11.5782	-11.3989	-11.5621	-11.328	-11.4438	-11.4837	-11.3895	-11.4319	-11.454	-11.4497
b3784	rfe	chr	+	3965938,	3967042,	-11.4263	-11.5352	-11.3736	-11.5464	-11.6978	-11.6477	-11.5524	-11.5447	-11.9409	-11.4416	-11.6313	-11.6006
b3785	wzzE	chr	+	3967053,	3968100,	-11.421	-11.8111	-11.5782	-11.8614	-11.7707	-11.7282	-11.945	-11.7363	-11.8447	-11.6103	-11.7946	-11.8526
b3807	cyaY	chr	-	3991761,	3992082,	-12.4263	-12.5916	-12.5178	-12.6381	-12.5996	-12.7521	-12.8519	-12.8667	-12.4413	-12.5184	-12.6421	-12.7887
b3812	yigB	chr	+	3995205,	3995922,	-14.6558	-14.1075	-14.1709	-14.8139	-14.3557	-14.1995	-14.9085	-14.9886	-14.0984	-14.2573	-14.4712	-14.7821
b3826	yigL	chr	+	4008222,	4009023,	-14.5596	-13.8959	-13.6988	-14.2469	-14.2625	-13.9041	-14.3824	-14.1219	-13.9915	-13.951	-14.1803	-14.2236
b3836	tatA	chr	+	4019967,	4020237,	-11.3691	-11.6229	-11.5104	-11.4867	-11.6927	-11.4398	-11.6335	-11.8569	-12.0175	-11.5096	-11.5643	-11.7625
b3842	rfaH	chr	-	4022355,	4022844,	-14.3043	-14.2124	-13.7675	-14.5244	-14.8933	-14.7521	-15.0929	-14.5525	-14.629	-14.0405	-14.722	-14.8086
b3859	rdoA	chr	+	4040437,	4041424,	-12.0625	-11.946	-12.2242	-12.2834	-12.3397	-12.7048	-12.3332	-12.5063	-12.7114	-12.0809	-12.3819	-12.4445
b3863	polA	chr	+	4044988,	4047775,	-12.2946	-12.1459	-12.1195	-12.1425	-12.2037	-12.3014	-12.2125	-12.2559	-12.477	-12.1721	-12.1992	-12.2642
b3868	glnG	chr	-	4051891,	4053301,	-13.8699	-13.1855	-13.1251	-13.3989	-13.5077	-13.5715	-13.508	-13.7186	-13.3395	-13.3069	-13.4789	-13.5522
b3870	glnA	chr	-	4054647,	4056057,	-11.3092	-11.3073	-11.2242	-11.4293	-11.3758	-11.4495	-11.4702	-11.5843	-11.477	-11.2744	-11.4092	-11.5109
b3892	fdoI	chr	-	4079247,	4079883,	-11.0219	-11.133	-11.0297	-11.5801	-11.6139	-11.479	-11.8042	-11.537	-11.459	-11.0627	-11.5746	-11.6506
b3895	fdhD	chr	+	4084038,	4084872,	-13.9902	-14.133	-14.2425	-14.4813	-14.3881	-14.489	-14.3824	-14.4911	-15.2139	-14.1358	-14.4408	-14.5191
b4484	cpxP	chr	+	4103842,	4104343,	-12.364	-12.1722	-12.1593	-12.8273	-12.9895	-12.801	-13.0929	-13.6498	-13.2753	-12.2141	-12.8914	-13.2967
b3918	cdh	chr	+	4107952,	4108708,	-14.1214	-14.2399	-14.9156	-14.8684	-14.8031	-14.8516	-14.5982	-14.7542	-15.7989	-14.4333	-14.836	-14.7821
b3919	tpiA	chr	-	4108762,	4109530,	-10.8273	-10.7456	-10.7009	-10.6649	-10.6876	-10.7521	-10.3332	-10.4504	-10.3726	-10.7482	-10.6915	-10.3798
b3929	rraA	chr	-	4116867,	4117353,	-10.5625	-10.5331	-10.6698	-10.6175	-10.5324	-10.4593	-10.3405	-10.4359	-10.3395	-10.5933	-10.548	-10.3736
b3933	ftsN	chr	-	4120402,	4121362,	-12.1828	-12.3781	-12.2733	-12.3209	-12.002	-12.3191	-12.3824	-12.2057	-11.8447	-12.2843	-12.1709	-12.2281
b3940	metL	chr	+	4127857,	4130290,	-11.5365	-11.5872	-11.7719	-11.6559	-11.4339	-11.5092	-11.6275	-11.6085	-11.2139	-11.6434	-11.5259	-11.5522
b3961	oxyR	chr	+	4156512,	4157430,	-12.3339	-12.5057	-12.6332	-12.5464	-12.5437	-12.1354	-12.2577	-12.01	-12.2753	-12.5067	-12.4559	-12.1668
b3972	murB	chr	+	4170079,	4171108,	-12.4914	-12.8111	-13.1709	-13.3989	-13.1471	-13.801	-13.6697	-13.7907	-14.0984	-12.8447	-13.3463	-13.769
b3998	nfi	chr	+	4196812,	4197484,	-14.5138	-14.9403	-13.8032	-14.7108	-14.9895	-14.5715	-15.16	-15.9062	-14.0984	-14.2968	-14.797	-15.1372
b4018	iclR	chr	-	4220826,	4221651,	-12.9138	-12.4246	-12.6494	-12.6499	-12.6381	-12.9041	-12.5982	-12.8473	-12.9409	-12.6275	-12.6904	-12.7306
b4041	plsB	chr	-	4252065,	4254489,	-11.034	-11.311	-11.3437	-11.1765	-11.0826	-11.1512	-11.1094	-10.9624	-10.88	-11.2464	-11.1295	-11.0204
b4138	dcuA	chr	-	4363494,	4364796,	-10.6746	-10.561	-10.5012	-10.641	-10.726	-10.8842	-10.845	-10.9834	-10.8102	-10.5651	-10.7232	-10.8875
b4178	nsrR	chr	+	4404212,	4404638,	-12.7064	-12.3629	-12.6173	-12.9689	-13.002	-12.7282	-13.3044	-13.2181	-13.2753	-12.5449	-12.933	-13.2688
b4180	rlmB	chr	+	4407297,	4408029,	-14.2658	-14.3554	-13.9753	-14.2469	-14.0926	-13.7521	-13.5982	-14.2688	-13.9915	-14.1721	-14.0716	-13.863
b4295	yjhU	chr	-	4517360,	4518347,	-13.3239	-13.07	-12.7852	-13.061	-12.7922	-12.6817	-12.8799	-12.7723	-12.7545	-13.0073	-12.8609	-12.822
b4389	radA	chr	+	4623934,	4625317,	-13.21	-13.2538	-13.3307	-13.1765	-13.0793	-13.1671	-13.0288	-13.4037	-12.4066	-13.272	-13.131	-13.0321
b4391	yjjK	chr	-	4626877,	4628545,	-10.4859	-10.648	-10.6595	-10.6059	-10.5948	-10.4398	-10.4836	-10.6126	-10.4152	-10.6088	-10.5674	-10.5177

## Sheet: (WT, C) < M
# Note: These are taken only from the case where both comparisons are significant						Replicates Separate									Replicates Combined									Fold Change
Name	Name2	Chr	Strand	Start	End	WT_1	WT_2	WT_3	M_1	M_2	M_3	C_1	C_2	C_3	WT_(1,2,3)	M_(1,2,3)	C_(1,2,3)	WT/M p-value	WT/M BH q-value	C/M p-value	C/M BH q-value	WT – M	C – M	WT/ M	C / M
b0014	dnaK	chr	+	12162,	14079,	-9.76222	-9.64687	-9.85948	-8.51014	-8.46596	-8.49404	-10.3975	-10.3013	-10.459	-9.75765	-8.48736	-10.3712	0.00162628	0.0105675	0.00024732	0.0047232	-1.27029	-1.8838	0.414576	0.270969
b0015	dnaJ	chr	+	14167,	15298,	-12.1562	-12.0762	-12.059	-11.3161	-11.2853	-11.4205	-12.6098	-12.6498	-12.5135	-12.0895	-11.3219	-12.6093	0.000205279	0.00324422	2.65882e-05	0.00196578	-0.767636	-1.28737	0.587379	0.409698
b0030	rihC	chr	+	27292,	28207,	-13.8699	-13.8111	-13.6822	-12.6381	-12.6978	-12.5092	-13.6944	-13.6838	-13.7989	-13.7732	-12.6378	-13.7055	0.000117249	0.00293329	0.000197534	0.00445786	-1.13547	-1.0677	0.455185	0.477081
b0064	araC	chr	+	70386,	71265,	-15.8133	-15.6924	-15.4247	-13.0142	-13.4381	-13.3014	-15.0929	-15.1692	-14.477	-15.6088	-13.2444	-15.0089	0.000153544	0.00306708	0.00595404	0.0261911	-2.36432	-1.76443	0.194208	0.294343
b0080	fruR	chr	+	88027,	89032,	-13.3239	-13.3404	-13.2182	-11.7423	-11.6776	-11.7282	-12.4026	-12.6167	-12.551	-13.2868	-11.7106	-12.4974	4.65237e-05	0.00169588	0.00335749	0.0181305	-1.57618	-0.786719	0.335368	0.579661
b0118	acnB	chr	+	131614,	134212,	-9.67141	-9.49844	-9.60251	-9.00085	-8.99342	-8.99539	-9.89773	-10.0073	-9.79889	-9.58256	-8.9965	-9.9205	0.00699555	0.0258984	0.00435453	0.0216504	-0.58606	-0.923992	0.66616	0.527049
b0126	can	chr	-	142007,	142670,	-11.8991	-11.6184	-11.7242	-11.0028	-10.8617	-11.0151	-11.8313	-11.8187	-12.155	-11.7286	-10.941	-11.87	0.00266131	0.0142779	0.00526352	0.0245318	-0.787659	-0.928981	0.579283	0.525229
b0145	dksA	chr	-	160148,	160604,	-9.03904	-9.05617	-9.18258	-8.3304	-8.26254	-8.27093	-9.14191	-9.15278	-9.05406	-9.10014	-8.28854	-9.13247	0.000697116	0.00627405	6.70348e-05	0.00291601	-0.811595	-0.843931	0.569752	0.557123
b0146	sfsA	chr	-	160781,	161486,	-13.4263	-13.548	-13.2182	-12.1679	-12.021	-12.074	-12.7842	-12.8473	-12.5894	-13.3793	-12.0833	-12.7755	0.00165376	0.0107016	0.00453009	0.0221226	-1.29599	-0.692271	0.407255	0.618879
b0163	yaeH	chr	-	183708,	184095,	-13.8413	-13.8959	-13.8213	-12.603	-12.4129	-12.931	-13.53	-13.6498	-14.0984	-13.852	-12.5705	-13.6446	0.0139319	0.0396091	0.00883402	0.033255	-1.28156	-1.07412	0.41135	0.47496
b0212	gloB	chr	-	234026,	234782,	-14.9902	-14.8529	-14.9552	-14.2469	-14.1196	-14.1995	-15.0288	-14.9062	-15.2139	-14.9276	-14.1803	-15.0089	0.000190543	0.00308155	0.00467347	0.0225884	-0.747274	-0.82856	0.595728	0.563091
b0240	crl	chr	+	257828,	258230,	-12.5949	-12.9861	-12.9855	-10.566	-10.8224	-10.7341	-12.8381	-12.4762	-12.7114	-12.8743	-10.7072	-12.6808	0.000526462	0.00515275	0.000215216	0.00461683	-2.16703	-1.97356	0.222669	0.254624
b0382	iraP	chr	+	400609,	400870,	-14.8699	-14.5828	-14.3437	-12.7108	-12.7707	-12.8261	-14.267	-14.0317	-14.3395	-14.5479	-12.759	-14.1884	0.00508692	0.0212998	0.00172119	0.0134313	-1.78887	-1.42941	0.289399	0.371284
b0430	cyoC	chr	-	447269,	447884,	-10.5336	-10.4891	-10.3955	-10.2424	-10.1663	-10.1671	-11.3675	-11.3346	-11.3232	-10.4625	-10.1937	-11.3491	0.00729035	0.0264275	3.09236e-05	0.00196578	-0.268822	-1.15544	0.829997	0.44893
b0431	cyoB	chr	-	447873,	449865,	-9.62806	-9.67005	-9.66361	-8.98197	-9.00359	-8.9707	-10.2532	-10.2244	-10.0307	-9.65656	-8.98927	-10.2081	4.83152e-06	0.00073072	0.00299141	0.0172204	-0.66729	-1.21883	0.629688	0.429632
b0432	cyoA	chr	-	449886,	450834,	-10.4	-10.3092	-10.4509	-9.39139	-9.44983	-9.45927	-10.7195	-10.723	-10.8331	-10.3872	-9.43007	-10.7369	0.000265162	0.00367207	4.85019e-05	0.0026191	-0.957182	-1.30683	0.515062	0.404207
b0435	bolA	chr	+	453695,	454013,	-12.548	-12.1459	-12.6252	-11.4447	-11.3437	-11.411	-12.53	-12.7011	-12.5894	-12.4223	-11.3928	-12.5977	0.0167687	0.0444327	0.000145833	0.00401778	-1.02954	-1.20487	0.489865	0.433808
b0437	clpP	chr	+	455900,	456524,	-11.9213	-11.8796	-12.1536	-11.4191	-11.4988	-11.5504	-12.021	-12.0761	-11.8682	-11.993	-11.4789	-12.0166	0.0159144	0.043122	0.0045916	0.0223306	-0.514132	-0.537659	0.700214	0.688888
b0438	clpX	chr	+	456649,	457924,	-10.4914	-10.3973	-10.2486	-9.8324	-9.97253	-9.74606	-10.4205	-10.5408	-10.5605	-10.3595	-9.87477	-10.4826	0.00551532	0.0224338	0.00207691	0.0146506	-0.484743	-0.607858	0.714625	0.65617
b0439	lon	chr	+	458111,	460466,	-10.3845	-10.4207	-10.5252	-9.45246	-9.49106	-9.45193	-10.7037	-10.7452	-10.5797	-10.4513	-9.46928	-10.6993	0.000829038	0.00705583	0.000920658	0.00947228	-0.982034	-1.22998	0.506265	0.426324
b0440	hupB	chr	+	460674,	460947,	-9.56539	-9.65148	-9.68423	-9.44468	-9.31613	-9.31465	-9.78418	-9.70542	-9.70086	-9.64138	-9.36134	-9.74327	0.00863468	0.0291311	0.00356122	0.0189689	-0.280034	-0.381927	0.823572	0.767412
b0453	ybaY	chr	+	474602,	475175,	-15.4263	-15.4809	-15.4247	-13.6146	-13.7182	-13.7048	-16.745	-16.4911	-16.7989	-15.4444	-13.6771	-16.6566	1.27562e-05	0.0010652	0.000322685	0.00529905	-1.7673	-2.9795	0.293757	0.126789
b0473	htpG	chr	+	494343,	496218,	-11.7193	-11.8008	-11.6413	-10.2627	-10.5032	-10.3058	-12.0848	-12.2688	-12.2139	-11.7152	-10.3729	-12.1668	0.000303008	0.0038267	7.01237e-05	0.00296794	-1.34224	-1.7939	0.394407	0.288392
b0506	allR	chr	+	532234,	533050,	-12.0708	-12.4246	-12.3113	-11.3448	-11.4129	-11.479	-12.6216	-12.7011	-12.9409	-12.2819	-11.4001	-12.6931	0.00796945	0.0277475	0.00184424	0.0136226	-0.881777	-1.293	0.542699	0.408101
b0598	cstA	chr	+	629116,	631222,	-13.3043	-13.4974	-12.8213	-10.3964	-10.4922	-10.4016	-12.1948	-12.4179	-12.3395	-13.1493	-10.439	-12.292	0.00441492	0.0195857	0.000171519	0.00422765	-2.71037	-1.85304	0.152791	0.276809
b0623	cspE	chr	+	656514,	656724,	-4.84145	-4.81897	-4.88188	-4.7136	-4.66593	-4.73664	-5.39423	-5.31	-5.62928	-4.84934	-4.69671	-5.39521	0.00721138	0.0262242	0.0131559	0.042728	-0.152626	-0.698496	0.899612	0.616214
b0655	gltI	chr	-	686061,	686970,	-14.7064	-15.6184	-15.2182	-13.2113	-13.5996	-13.7048	-15.0288	-14.5525	-14.7989	-15.1813	-13.4635	-14.8086	0.0101062	0.0322328	0.00327271	0.0180649	-1.71778	-1.34501	0.304015	0.39365
b0679	nagE	chr	+	703166,	705113,	-10.5138	-10.7139	-10.8374	-9.72332	-9.73637	-9.71058	-10.9524	-10.8618	-10.5894	-10.7052	-9.72658	-10.8613	0.00908342	0.0300098	0.00982771	0.0357577	-0.9786	-1.13469	0.507472	0.455431
b0683	fur	chr	-	709422,	709869,	-10.3845	-10.2893	-10.3388	-9.96148	-9.91087	-9.92085	-10.5467	-10.5525	-10.6593	-10.3329	-9.93105	-10.5649	0.000784949	0.00686721	0.000880164	0.00937644	-0.401896	-0.633806	0.756863	0.644474
b0710	ybgI	chr	+	742049,	742793,	-14.1918	-14.0577	-13.5552	-12.8964	-12.9771	-12.6146	-13.8519	-13.7186	-13.3395	-13.8668	-12.871	-13.718	0.0138062	0.0395979	0.0159081	0.0473631	-0.995849	-0.846987	0.501441	0.555945
b0720	gltA	chr	-	752407,	753691,	-11.0543	-11.2364	-11.2333	-9.5176	-9.48009	-9.55828	-11.8313	-11.8	-12.477	-11.186	-9.50861	-11.8981	0.000374703	0.00431459	0.00712056	0.029663	-1.67735	-2.3895	0.312656	0.190848
b0721	sdhC	chr	+	754399,	754789,	-13.8991	-13.6184	-14.6015	-11.7046	-11.5346	-11.5194	-12.8519	-13.2181	-12.9915	-14.0155	-11.5912	-12.9936	0.0113904	0.0350869	0.00108277	0.0101678	-2.42436	-1.40243	0.186292	0.378291
b0722	sdhD	chr	+	754782,	755130,	-13.3043	-13.2965	-13.3702	-11.3839	-11.7234	-11.3102	-13.267	-13.3482	-13.2753	-13.3272	-11.5081	-13.2967	0.00370407	0.0175775	0.00363564	0.0191697	-1.81906	-1.78854	0.283405	0.289464
b0723	sdhA	chr	+	755129,	756896,	-10.3067	-10.2839	-10.2394	-8.52441	-8.63927	-8.61729	-10.5924	-10.6415	-10.3559	-10.272	-8.59221	-10.5719	2.00463e-05	0.00109636	0.000580845	0.00721908	-1.67977	-1.97972	0.312132	0.253539
b0724	sdhB	chr	+	756911,	757628,	-10.8343	-11.0126	-11.1167	-9.85113	-9.91973	-9.99006	-11.6882	-12.0317	-11.5135	-11.0032	-9.9075	-11.7723	0.00160231	0.0105675	0.00451962	0.0221226	-1.09571	-1.86479	0.467905	0.274563
b0726	sucA	chr	+	757928,	760730,	-9.43828	-9.38001	-9.30014	-8.88757	-8.95193	-8.89242	-10.3799	-10.4431	-10.1407	-9.36246	-8.91661	-10.3638	0.00198551	0.0118225	0.00295765	0.0171554	-0.44585	-1.44716	0.734152	0.366742
b0810	glnP	chr	-	845682,	846342,	-14.3043	-14.7309	-14.3702	-13.1594	-13.2182	-13.0442	-14.5524	-14.1219	-14.0984	-14.4667	-13.1616	-14.3155	0.00466059	0.0202174	0.0103738	0.0372602	-1.30513	-1.15392	0.404685	0.449403
b0811	glnH	chr	-	846480,	847227,	-13.006	-12.9631	-13.0271	-12.2113	-12.2402	-12.3191	-13.4438	-13.7186	-14.0984	-12.9991	-12.2444	-13.6209	0.000175653	0.00306708	0.0137255	0.0437881	-0.754697	-1.3765	0.592671	0.385151
b0812	dps	chr	-	847630,	848134,	-12.4477	-12.3629	-12.3242	-11.6381	-11.6332	-11.7164	-12.4971	-12.4762	-12.2443	-12.3687	-11.6508	-12.4497	0.000161769	0.00306708	0.00679847	0.0286194	-0.717951	-0.798956	0.60796	0.574765
b0864	artP	chr	-	902228,	902957,	-13.7858	-13.7505	-13.5859	-13.1594	-13.0661	-13.1671	-13.745	-13.6167	-13.7114	-13.6919	-13.1189	-13.6931	0.00355189	0.0172206	0.000428968	0.00616297	-0.573047	-0.574185	0.672196	0.671666
b0880	cspD	chr	-	921588,	921813,	-12.0708	-12.4646	-12.4247	-10.2201	-10.1315	-10.2666	-11.8244	-12.0317	-11.6696	-12.3375	-10.189	-11.87	0.00168352	0.010717	0.00156477	0.0128422	-2.1485	-1.68101	0.225547	0.311864
b0881	clpS	chr	+	922135,	922456,	-13.583	-13.8529	-13.5401	-11.5299	-11.6528	-11.7048	-12.7579	-12.7542	-13.0984	-13.653	-11.6164	-12.8019	0.000327322	0.00396868	0.00295294	0.0171554	-2.03655	-1.1855	0.243745	0.439673
b0882	clpA	chr	+	922486,	924763,	-11.0917	-11.311	-11.3803	-9.85456	-10.0515	-9.80097	-11.2304	-11.1752	-11.1842	-11.2769	-9.9271	-11.2037	0.000330306	0.00396868	0.00235629	0.015185	-1.34981	-1.2766	0.392344	0.412767
b0889	lrp	chr	+	931817,	932312,	-12.2284	-12.0577	-12.0271	-11.2559	-11.4725	-11.5609	-12.2577	-12.0427	-12.4413	-12.0874	-11.4056	-12.2015	0.00524092	0.0216551	0.00593453	0.0261788	-0.681785	-0.795935	0.623394	0.57597
b0932	pepN	chr	+	989844,	992457,	-11.497	-11.632	-11.3972	-10.8649	-11.0434	-10.7106	-11.4026	-11.3826	-11.5701	-11.5009	-10.9081	-11.4188	0.0076562	0.0273735	0.0110868	0.0386681	-0.592802	-0.510644	0.663054	0.701909
b0956	ycbG	chr	+	1017707,	1018160,	-14.1918	-13.9403	-14.2182	-13.229	-13.2037	-13.3014	-14.7975	-14.3757	-14.629	-14.1092	-13.2314	-14.6093	0.00578307	0.0231619	0.00578883	0.0258271	-0.877807	-1.37788	0.544194	0.384784
b0963	mgsA	chr	-	1025779,	1026238,	-11.2054	-11.6596	-11.5705	-10.1765	-10.2948	-10.3236	-11.3725	-11.4987	-11.3895	-11.4952	-10.256	-11.4188	0.00783786	0.0276188	4.82174e-05	0.0026191	-1.23924	-1.16284	0.423596	0.446633
b1002	agp	chr	+	1064807,	1066049,	-13.3239	-13.6005	-13.3972	-12.9689	-12.9168	-12.8261	-14.267	-14.0761	-14.0984	-13.4444	-12.9173	-14.1711	0.0106654	0.0333374	0.000155726	0.00407331	-0.5271	-1.25387	0.693948	0.419323
b1014	putA	chr	-	1074142,	1078105,	-11.548	-11.4974	-11.4705	-9.60158	-9.71565	-9.59555	-12.1515	-12.1572	-11.3395	-11.4995	-9.64967	-12.0012	1.71466e-05	0.00109636	0.012953	0.0423474	-1.84984	-2.35154	0.277423	0.195936
b1015	putP	chr	+	1078527,	1080036,	-12.6936	-12.8529	-13.3569	-9.98384	-10.0876	-10.0187	-12.923	-13.0761	-12.629	-12.9829	-10.0357	-12.9268	0.0039012	0.0181824	0.00134061	0.011861	-2.94723	-2.89114	0.129657	0.134797
b1136	icd	chr	+	1194345,	1195596,	-10.4776	-10.3535	-10.3536	-9.64399	-9.66139	-9.69895	-10.6335	-10.671	-10.6799	-10.3846	-9.6622	-10.6536	0.0010757	0.00817744	1.59764e-06	0.000500382	-0.722381	-0.991353	0.606096	0.503006
b1138	ymfE	chr	-	1196755,	1197460,	-14.9288	-15.133	-15.0807	-13.4603	-13.2625	-12.8261	-14.8519	-15.1692	-15.477	-15.0573	-13.2314	-15.0399	0.00570986	0.0229721	0.00159851	0.0129034	-1.82597	-1.80851	0.282052	0.285485
b1189	dadA	chr	+	1236793,	1238092,	-12.9138	-12.6736	-12.3836	-10.2201	-10.2588	-10.1671	-12.6216	-12.9676	-12.8447	-12.6056	-10.2265	-12.769	0.00313988	0.0158157	0.000813171	0.00890508	-2.37914	-2.54252	0.192224	0.171642
b1190	dadX	chr	+	1238101,	1239172,	-12.8133	-12.8111	-12.7852	-10.647	-10.5483	-10.4642	-13.5751	-13.4911	-12.9409	-12.8014	-10.5664	-13.4342	0.00039675	0.00437543	0.00316669	0.0175852	-2.23504	-2.86781	0.212416	0.136995
b1332	ynaJ	chr	+	1395388,	1395646,	-12.2009	-12.1459	-12.4316	-10.8546	-10.7105	-10.6477	-12.4026	-12.2688	-12.9915	-12.2671	-10.7485	-12.4239	0.000278794	0.00370187	0.0102948	0.0372175	-1.51856	-1.6754	0.349035	0.31308
b1415	aldA	chr	+	1486255,	1487695,	-12.1301	-12.2821	-12.2182	-9.43824	-9.34368	-9.46419	-12.4334	-12.4323	-12.0984	-12.2164	-9.40054	-12.3786	1.52661e-06	0.000431497	0.000560627	0.00712574	-2.8159	-2.97804	0.142014	0.126918
b1603	pntA	chr	-	1674394,	1675927,	-11.4423	-11.409	-11.4776	-10.999	-11.0993	-11.1751	-11.508	-11.4323	-11.3559	-11.4444	-11.076	-11.4575	0.011739	0.0355577	0.00758321	0.0304495	-0.368402	-0.381577	0.77464	0.767598
b1612	fumA	chr	-	1684754,	1686401,	-11.2284	-11.2965	-11.1826	-10.2696	-10.2218	-10.2285	-11.923	-11.7274	-11.629	-11.2331	-10.2403	-11.8052	0.000180186	0.00306708	0.00255144	0.0160183	-0.992776	-1.56489	0.50251	0.338004
b1619	hdhA	chr	-	1695296,	1696064,	-13.1387	-13.548	-13.2303	-12.603	-12.5437	-12.3014	-13.2856	-13.9468	-13.7114	-13.3069	-12.514	-13.5522	0.00746736	0.0268209	0.0137669	0.0437881	-0.792825	-1.03818	0.577213	0.48694
b1702	pps	chr	-	1782757,	1785136,	-11.5596	-11.6503	-11.321	-10.6117	-10.6726	-10.5041	-11.3044	-11.3212	-11.307	-11.4895	-10.6164	-11.3108	0.00389406	0.0181824	0.00435367	0.0216504	-0.873054	-0.694385	0.54599	0.617973
b1729	ydjN	chr	+	1808957,	1810349,	-14.2658	-15.2399	-14.1944	-12.5576	-12.3963	-12.2327	-14.0929	-14.1692	-13.9915	-14.5009	-12.4185	-14.104	0.0174647	0.0456281	0.000455505	0.00639526	-2.08249	-1.68556	0.236107	0.310883
b1739	osmE	chr	-	1819941,	1820280,	-11.9902	-11.6366	-11.7632	-10.7711	-10.7495	-10.7223	-12.3625	-12.1103	-12.3726	-11.7715	-10.752	-12.2688	0.00862667	0.0291311	0.00251756	0.0158972	-1.01951	-1.51683	0.493284	0.349452
b1761	gdhA	chr	+	1840394,	1841738,	-13.4914	-13.7906	-13.5252	-12.7744	-12.7814	-12.5929	-13.8244	-13.9062	-13.551	-13.6025	-12.7404	-13.8086	0.00259522	0.0142094	0.0027645	0.0168761	-0.862159	-1.06817	0.550129	0.476922
b1795	yeaQ	chr	-	1877030,	1877279,	-11.9592	-12.0886	-12.2182	-11.3839	-11.4509	-11.4991	-12.3925	-12.6667	-12.3726	-12.1026	-11.4352	-12.4813	0.00568718	0.0229721	0.00424579	0.0215537	-0.667396	-1.0461	0.629642	0.484277
b1799	yeaT	chr	-	1878909,	1879833,	-15.5138	-14.8111	-15.2182	-12.9541	-12.7495	-12.801	-14.0288	-13.9062	-14.2139	-15.1269	-12.831	-14.0089	0.00438711	0.0195343	0.000684586	0.00799997	-2.29585	-1.17783	0.203648	0.442017
b1817	manX	chr	+	1900071,	1901043,	-11.8343	-11.4809	-11.6133	-10.9213	-10.9168	-10.9936	-11.945	-11.6838	-11.9915	-11.6181	-10.933	-11.8526	0.0166979	0.0443837	0.0073171	0.0299963	-0.685077	-0.91961	0.621972	0.528652
b1823	cspC	chr	-	1905249,	1905459,	-8.67456	-8.66247	-8.75713	-8.17542	-8.10815	-8.0853	-9.08986	-8.93784	-9.04067	-8.70228	-8.12776	-9.02672	0.000146859	0.00306708	0.000246797	0.0047232	-0.574521	-0.898961	0.671509	0.536273
b1829	htpX	chr	-	1909718,	1910600,	-11.2564	-11.311	-11.5141	-10.5135	-10.6528	-10.801	-11.3478	-11.2244	-11.307	-11.3727	-10.627	-11.2967	0.00353523	0.0171931	0.00790158	0.0311542	-0.745609	-0.669616	0.596416	0.628674
b1832	yebR	chr	-	1913654,	1914206,	-12.7589	-12.5653	-12.8772	-12.0142	-11.8031	-11.9447	-13.143	-12.9676	-13.2139	-12.732	-11.9043	-13.0877	0.00287141	0.0147771	0.000285687	0.00508578	-0.827767	-1.18346	0.563401	0.440295
b1929	yedE	chr	+	2006300,	2007506,	-12.6189	-12.6366	-12.7764	-10.8546	-10.7054	-10.8645	-11.5694	-11.5525	-11.4413	-12.6854	-10.7886	-11.5439	1.29239e-05	0.0010652	0.000539657	0.00698432	-1.89679	-0.755278	0.26854	0.592432
b1976	mtfA	chr	+	2041674,	2042472,	-14.2658	-14.9403	-14.4812	-12.6619	-12.4812	-12.8516	-14.2304	-15.2688	-14.9915	-14.5598	-12.6122	-14.6327	0.00325202	0.0160146	0.0126462	0.041605	-1.94768	-2.02055	0.259233	0.246464
b2095	gatZ	chr	-	2173080,	2174343,	-8.91757	-8.92075	-8.99517	-8.75422	-8.68575	-8.72084	-9.50797	-9.46693	-9.48601	-8.94882	-8.71717	-9.48998	0.00274551	0.0144763	2.95638e-05	0.00196578	-0.231651	-0.77281	0.85166	0.585276
b2096	gatY	chr	-	2174371,	2175226,	-9.06771	-9.00665	-9.0644	-8.06002	-8.09012	-8.03781	-8.98536	-9.02219	-8.78208	-9.04493	-8.06887	-8.96633	4.84773e-06	0.00073072	0.00570432	0.0256186	-0.976062	-0.897458	0.508365	0.536832
b2148	mglC	chr	-	2234764,	2235775,	-10.8343	-11.0577	-10.7942	-9.81726	-9.75211	-9.75206	-12.771	-12.7907	-12.4413	-10.8912	-9.77549	-12.7242	0.00333691	0.0163812	0.0010908	0.0101678	-1.1157	-2.94875	0.461466	0.12952
b2149	mglA	chr	-	2235790,	2237311,	-12.3141	-12.7704	-12.4247	-10.5081	-10.2834	-10.4495	-14.0288	-13.4037	-14.0984	-12.5038	-10.3937	-13.7821	0.000997954	0.00801434	0.00215787	0.0148032	-2.11013	-3.38839	0.231626	0.095498
b2150	mglB	chr	-	2237371,	2238370,	-10.739	-10.6712	-10.6759	-9.00275	-9.04823	-9.08909	-12.0288	-11.9676	-11.9915	-10.6903	-9.03924	-12.0012	1.18626e-06	0.000431497	2.66363e-07	0.000104281	-1.65106	-2.96197	0.318405	0.128339
b2151	galS	chr	-	2238649,	2239690,	-15.2658	-15.6924	-15.4247	-11.644	-11.9527	-11.8776	-14.745	-14.5525	-14.3395	-15.4667	-11.8188	-14.6093	3.69596e-05	0.00160774	7.7009e-05	0.00297545	-3.64796	-2.79048	0.0797729	0.144538
b2175	spr	chr	+	2268000,	2268567,	-8.5187	-8.52936	-8.52797	-7.59583	-7.62049	-7.61934	-8.40134	-8.38786	-8.71674	-8.52605	-7.61124	-8.43868	6.56377e-06	0.000734205	0.0138732	0.043836	-0.914816	-0.827445	0.530412	0.563526
b2181	yejG	chr	-	2275914,	2276259,	-15.6069	-15.3554	-14.8032	-13.1094	-13.0146	-13.1995	-14.0929	-13.6498	-13.9915	-15.163	-13.0833	-13.9052	0.00927814	0.0303331	0.0162273	0.0478569	-2.07968	-0.821962	0.236567	0.565672
b2210	mqo	chr	-	2303129,	2304776,	-14.2658	-14.3554	-14.6988	-13.0452	-12.9895	-12.801	-15.2304	-15.4911	-14.629	-14.4555	-12.9705	-15.2059	0.00180677	0.0112278	0.00912278	0.0339406	-1.485	-2.23539	0.357249	0.212364
b2287	nuoB	chr	-	2401972,	2402635,	-10.8991	-11.133	-10.9602	-10.5162	-10.5324	-10.489	-11.0016	-10.9213	-11.1265	-11.0012	-10.518	-10.9898	0.0176736	0.0458987	0.0110553	0.038644	-0.483171	-0.471807	0.715403	0.721061
b2309	hisJ	chr	-	2424027,	2424810,	-14.7064	-14.2679	-14.6657	-13.3989	-13.5256	-13.489	-14.8519	-14.4323	-14.3395	-14.5242	-13.4712	-14.6093	0.0120058	0.0360865	0.016743	0.0489172	-1.05302	-1.13805	0.481959	0.454373
b2365	dsdX	chr	+	2475868,	2477206,	-14.8699	-15.6924	-14.3702	-11.8893	-12.2476	-12.1044	-15.16	-16.0761	-16.2139	-14.852	-12.0803	-15.5634	0.0126038	0.0370311	0.00439647	0.0216562	-2.77168	-3.4831	0.146434	0.0894297
b2366	dsdA	chr	+	2477223,	2478552,	-13.3239	-13.159	-12.8583	-12.069	-12.2328	-11.8388	-14.0929	-14.3757	-13.9915	-13.0701	-12.0892	-14.1711	0.00427606	0.0192977	0.000202282	0.0044616	-0.980976	-2.08198	0.506637	0.23619
b2399	yfeD	chr	+	2516855,	2517227,	-13.3043	-13.7115	-13.6494	-12.8823	-12.6978	-12.8776	-13.6455	-13.5525	-13.477	-13.5719	-12.797	-13.5862	0.0150645	0.0413572	0.000855992	0.00924471	-0.774944	-0.789198	0.584411	0.578666
b2412	zipA	chr	-	2528268,	2529255,	-10.2706	-10.2469	-10.1097	-9.59583	-9.65398	-9.56355	-9.97871	-10.0649	-9.97871	-10.197	-9.61481	-10.0089	0.0016785	0.010717	0.000514991	0.00689296	-0.582213	-0.394051	0.667938	0.76099
b2414	cysK	chr	+	2530430,	2531402,	-12.9746	-12.8008	-13.1251	-11.2069	-11.1264	-11.1044	-13.2486	-13.1219	-12.9915	-12.9669	-11.1508	-13.1626	0.00111933	0.00842723	0.000309974	0.00524897	-1.81608	-2.01176	0.283992	0.24797
b2463	maeB	chr	-	2574119,	2576399,	-11.0139	-11.1394	-10.9753	-10.476	-10.4424	-10.3689	-11.5982	-11.4688	-11.3395	-11.0405	-10.4399	-11.5109	0.00106375	0.00816583	0.00171481	0.0134313	-0.60058	-1.07099	0.659489	0.475991
b2518	ndk	chr	-	2642454,	2642886,	-12.1918	-11.8529	-11.9855	-10.4629	-10.3457	-10.3506	-12.1261	-11.9993	-12.1265	-11.987	-10.3883	-12.0796	0.00129798	0.00928144	8.34121e-06	0.00144278	-1.59869	-1.69137	0.330176	0.309632
b2520	yfhM	chr	-	2645347,	2650309,	-12.0462	-12.0215	-12.059	-11.4973	-11.3677	-11.4691	-11.9377	-11.8863	-11.7114	-12.0426	-11.4333	-11.884	0.00250102	0.0138886	0.0127368	0.0417277	-0.609234	-0.450636	0.655545	0.73172
b2535	csiE	chr	+	2663456,	2664737,	-13.9902	-14.2965	-14.7328	-12.7233	-12.6187	-13.0442	-14.3824	-13.7542	-14.2139	-14.3582	-12.7312	-14.104	0.00674334	0.025446	0.00635839	0.0275062	-1.62704	-1.37285	0.323752	0.386128
b2584	yfiQ	chr	+	2717974,	2720635,	-12.7324	-12.7906	-12.7072	-11.2696	-11.0402	-11.2243	-11.9377	-12.1219	-11.892	-12.7422	-11.1554	-11.9936	0.000724129	0.0064067	0.00125414	0.0112873	-1.58679	-0.838168	0.33291	0.559353
b2587	kgtP	chr	-	2722469,	2723768,	-10.0896	-10.0684	-9.91199	-9.16473	-9.10688	-9.04977	-10.3478	-10.3653	-10.468	-10.0099	-9.11627	-10.3712	0.000504808	0.00506674	1.54449e-05	0.00151167	-0.893594	-1.25488	0.538272	0.419027
b2597	raiA	chr	+	2735175,	2735517,	-10.004	-10.1492	-10.1435	-8.00323	-8.04742	-7.99895	-9.7612	-9.7076	-9.7545	-10.1081	-8.02175	-9.74088	0.000161564	0.00306708	2.04051e-07	0.000104281	-2.08634	-1.71913	0.235478	0.303731
b2614	grpE	chr	-	2748136,	2748730,	-10.5451	-10.8318	-10.678	-9.8649	-9.95269	-9.92763	-10.9562	-10.7953	-11.1695	-10.6928	-9.91531	-10.925	0.00694522	0.025773	0.00756684	0.0304495	-0.777463	-1.00971	0.583392	0.496647
b2677	proV	chr	+	2802836,	2804039,	-12.1214	-12.0638	-12.1139	-11.073	-10.9227	-11.0079	-12.7069	-12.8863	-13.2139	-12.0982	-10.9924	-12.8355	0.000366203	0.00424795	0.00339031	0.0182447	-1.10586	-1.84316	0.464625	0.27871
b2678	proW	chr	+	2804031,	2805096,	-12.0875	-12.2965	-12.1307	-11.0571	-11.0893	-10.8974	-12.53	-12.9468	-12.5894	-12.1744	-11.0385	-12.6747	0.000190875	0.00308155	0.00185288	0.0136226	-1.13589	-1.63618	0.455055	0.321707
b2696	csrA	chr	-	2816982,	2817168,	-10.2307	-10.2451	-10.3602	-9.98197	-10.013	-10.0553	-10.8381	-10.8	-10.9285	-10.2856	-10.0097	-10.8372	0.0108242	0.0336993	0.000233823	0.00465325	-0.275903	-0.827553	0.825933	0.563484
b2741	rpoS	chr	-	2864580,	2865573,	-10.4914	-10.5016	-10.4598	-9.43952	-9.44449	-9.43013	-10.5552	-10.6044	-10.8216	-10.4823	-9.43989	-10.6093	3.20025e-05	0.00145834	0.00436879	0.0216504	-1.04243	-1.16936	0.48551	0.444617
b2742	nlpD	chr	-	2865635,	2866775,	-10.9363	-10.7881	-10.9452	-10.079	-10.0321	-10.0702	-11.0055	-10.994	-10.7436	-10.8865	-10.0564	-10.9598	0.00211329	0.0121873	0.00842531	0.0323383	-0.830071	-0.903419	0.562501	0.534618
b2799	fucO	chr	-	2929886,	2931038,	-15.1214	-15.4168	-15.3702	-13.1765	-13.49	-13.9041	-14.9674	-14.7542	-15.2139	-15.317	-13.4333	-14.9196	0.00619488	0.0241414	0.00715934	0.029663	-1.88365	-1.48626	0.270997	0.356937
b2805	fucR	chr	+	2937389,	2938121,	-15.5138	-14.9861	-15.6015	-13.1938	-12.76	-13.0442	-14.3429	-14.4911	-15.2139	-15.3375	-12.9597	-14.4974	0.0010175	0.00805794	0.0125305	0.0413982	-2.37775	-1.53766	0.192409	0.344444
b2833	ygdR	chr	+	2969292,	2969511,	-13.8413	-13.4325	-13.6332	-12.5027	-12.5256	-12.1995	-13.4863	-13.6167	-13.7114	-13.6088	-12.4484	-13.5634	0.00156772	0.0104917	0.00147787	0.0125779	-1.16039	-1.11509	0.447391	0.461663
b2844	yqeF	chr	-	2982432,	2983614,	-14.4694	-14.0096	-13.8583	-11.0066	-11.0305	-11.4398	-12.9825	-13.01	-12.2139	-14.0489	-11.0921	-12.8492	0.000318801	0.00393104	0.0122241	0.0411676	-2.95678	-1.7571	0.128801	0.295841
b2869	ygeV	chr	-	3002029,	3003808,	-14.4694	-14.8111	-15.6015	-12.7615	-12.5714	-12.6146	-14.1261	-14.1219	-14.629	-14.9589	-12.6464	-14.1884	0.0180467	0.0464057	0.00570938	0.0256186	-2.31253	-1.542	0.201308	0.34341
b2898	ygfZ	chr	+	3039334,	3040315,	-12.6434	-12.6924	-12.6739	-12.2559	-12.1401	-12.2666	-12.682	-12.6838	-12.477	-12.6723	-12.2056	-12.6506	0.00404076	0.0186662	0.0132596	0.0428135	-0.466706	-0.444949	0.723615	0.73461
b2899	yqfA	chr	-	3040510,	3041170,	-13.7858	-13.3858	-13.1944	-12.1176	-11.9346	-11.801	-12.923	-13.0317	-12.9915	-13.3953	-11.9705	-12.971	0.00449858	0.0197877	0.00401058	0.020728	-1.42476	-1.00048	0.37248	0.499832
b2910	zapA	chr	+	3053633,	3053963,	-9.23415	-9.37049	-9.28904	-8.44339	-8.34866	-8.39333	-9.47288	-9.4179	-9.75997	-9.30214	-8.39121	-9.49132	0.00011048	0.00287556	0.00568736	0.0256186	-0.910935	-1.10011	0.53184	0.466481
b2913	serA	chr	-	3055199,	3056432,	-12.7064	-12.5653	-12.6822	-12.0531	-11.9406	-12.1044	-12.9674	-12.7363	-13.0984	-12.6466	-12.0118	-12.8981	0.000720368	0.0064067	0.00569495	0.0256186	-0.634785	-0.886344	0.644037	0.540983
b2916	argP	chr	+	3057774,	3058668,	-14.1214	-13.9631	-14.3437	-13.2113	-13.4381	-13.074	-14.3429	-13.8282	-13.9915	-14.1448	-13.2776	-14.0877	0.00418389	0.0190132	0.0150781	0.0462081	-0.867208	-0.810119	0.548207	0.570335
b2922	yggE	chr	-	3065361,	3066102,	-13.583	-13.2965	-13.3972	-12.8273	-12.76	-12.7763	-13.3824	-13.4911	-13.477	-13.406	-12.7874	-13.4342	0.0130618	0.0382334	0.000289019	0.00508578	-0.618652	-0.646781	0.651279	0.638704
b2964	nupG	chr	+	3103735,	3104992,	-12.7193	-12.5828	-12.3836	-11.1722	-11.2701	-11.3552	-13.143	-12.9264	-13.155	-12.533	-11.2494	-13.0636	0.00118243	0.0087243	8.09477e-05	0.00301819	-1.28369	-1.81425	0.410745	0.284353
b3029	ygiN	chr	+	3171163,	3171478,	-12.1828	-12.3934	-12.1709	-11.5027	-11.5032	-11.4016	-12.5411	-12.8863	-12.7989	-12.2476	-11.4828	-12.6931	0.00287315	0.0147771	0.00346337	0.0185741	-0.764807	-1.21033	0.588532	0.432171
b3032	cpdA	chr	-	3174027,	3174855,	-11.9213	-12.1459	-12.2425	-11.4039	-11.2073	-11.1121	-11.923	-12.0761	-11.9162	-12.1202	-11.256	-11.9747	0.00264094	0.0142779	0.00387475	0.020159	-0.864267	-0.718782	0.549325	0.60761
b3118	tdcA	chr	-	3264148,	3265087,	-15.8133	-16.0335	-16.3177	-12.9249	-12.7922	-12.931	-13.8244	-13.8282	-13.629	-16.0744	-12.8659	-13.7953	0.000953365	0.00776506	0.000725649	0.00817529	-3.2085	-0.929346	0.10818	0.525096
b3149	diaA	chr	+	3293830,	3294421,	-12.4477	-12.4974	-12.8213	-11.7486	-11.7338	-11.931	-12.6216	-12.5215	-12.8447	-12.6025	-11.7755	-12.6151	0.00908117	0.0300098	0.0029168	0.0171554	-0.827056	-0.83959	0.563679	0.558802
b3178	hflB	chr	-	3323022,	3324957,	-9.50673	-9.58169	-9.5289	-9.32207	-9.24852	-9.32579	-9.49979	-9.49868	-9.50887	-9.54118	-9.28981	-9.50073	0.00213417	0.0122422	0.0137851	0.0437881	-0.251368	-0.210917	0.8401	0.863988
b3179	rrmJ	chr	-	3325056,	3325686,	-11.8771	-11.8635	-11.9502	-11.3594	-11.106	-11.0516	-12.314	-12.3896	-12.0984	-11.9007	-11.1819	-12.3061	0.0117845	0.0356241	0.00108346	0.0101678	-0.71881	-1.12419	0.607598	0.458759
b3207	yrbL	chr	+	3346473,	3347106,	-11.6558	-11.7505	-11.6534	-10.9035	-11.1298	-10.9795	-11.3725	-11.3896	-11.459	-11.687	-11.0146	-11.391	0.00315949	0.0158582	0.0158421	0.0473631	-0.672451	-0.376459	0.62744	0.770326
b3223	nanE	chr	-	3368368,	3369058,	-12.5596	-12.6457	-12.9552	-11.4551	-11.9286	-11.6817	-13.6944	-13.6167	-13.155	-12.7354	-11.6926	-13.5748	0.00502056	0.0211016	0.00137191	0.0120697	-1.04278	-1.88213	0.485391	0.271283
b3224	nanT	chr	-	3369105,	3370596,	-11.6809	-12.1202	-11.9855	-10.3914	-10.2328	-10.1751	-12.6216	-12.4323	-12.5894	-11.9432	-10.2768	-12.5466	0.00158489	0.0105167	1.38197e-05	0.00144278	-1.66641	-2.26988	0.315036	0.207347
b3225	nanA	chr	-	3370704,	3371598,	-10.8484	-10.8008	-10.8987	-9.93037	-9.88317	-10.0516	-11.7258	-11.5763	-11.7765	-10.8511	-9.93171	-11.6778	0.000438292	0.00473356	3.13822e-05	0.00196578	-0.919391	-1.74604	0.528732	0.298119
b3236	mdh	chr	-	3381351,	3382290,	-9.71448	-9.67356	-9.67182	-9.04622	-9.01462	-8.98299	-10.1472	-10.1132	-9.92237	-9.68333	-9.01982	-10.0999	1.48174e-05	0.00109636	0.00276957	0.0168761	-0.663511	-1.08011	0.63134	0.472993
b3316	rpsS	chr	-	3448269,	3448548,	-8.78414	-8.81622	-8.8026	-8.60663	-8.57371	-8.5426	-8.91846	-8.96759	-9.13	-8.80251	-8.57948	-8.9654	0.00175445	0.0109461	0.0154177	0.046973	-0.223026	-0.385915	0.856766	0.765294
b3336	bfr	chr	-	3464270,	3464747,	-13.583	-12.8959	-13.1364	-11.7615	-12.0083	-11.8388	-13.2486	-13.8667	-13.892	-13.1448	-11.8811	-13.53	0.0136926	0.0394166	0.00773614	0.0308265	-1.26367	-1.64889	0.416482	0.318884
b3357	crp	chr	+	3484141,	3484774,	-11.3043	-11.561	-11.4994	-10.6831	-10.726	-10.7461	-11.3092	-11.2181	-11.5135	-11.4667	-10.714	-11.3037	0.00802209	0.0277475	0.0154797	0.0470128	-0.752692	-0.589664	0.593495	0.664498
b3397	nudE	chr	-	3523610,	3524171,	-12.2946	-12.4727	-12.0917	-11.644	-11.3397	-11.4301	-12.3527	-12.2306	-12.4066	-12.2671	-11.4616	-12.3155	0.0051618	0.0214983	0.0029332	0.0171554	-0.80542	-0.853881	0.572195	0.553294
b3398	yrfF	chr	+	3524490,	3526626,	-12.6311	-12.5916	-12.8397	-11.7423	-11.776	-11.6477	-12.771	-12.4037	-12.477	-12.6952	-11.7381	-12.5862	0.00166733	0.010717	0.0111228	0.0387073	-0.957166	-0.848092	0.515068	0.555519
b3399	yrfG	chr	+	3526690,	3527359,	-13.1214	-13.0577	-13.1139	-12.229	-12.3718	-12.216	-13.3429	-13.8282	-13.4066	-13.096	-12.2877	-13.5082	0.00119637	0.00875474	0.00891364	0.0334742	-0.808348	-1.22047	0.571035	0.429143
b3403	pck	chr	+	3530839,	3532462,	-10.7456	-10.7115	-10.7897	-9.73433	-9.67383	-9.70185	-10.5552	-10.7452	-10.5992	-10.7508	-9.70105	-10.6268	6.13803e-06	0.000734205	0.00195732	0.0140604	-1.04972	-0.925764	0.48306	0.526402
b3414	gntY	chr	+	3543645,	3544221,	-12.4694	-12.409	-12.5859	-12.151	-12.161	-12.3014	-13.0132	-13.0537	-13.2139	-12.4923	-12.1834	-13.0557	0.0164214	0.0439123	0.000449231	0.00639526	-0.308879	-0.872215	0.807269	0.546308
b3416	malQ	chr	-	3546007,	3548092,	-13.0543	-12.5653	-12.7675	-11.674	-11.6332	-11.7886	-13.143	-13.3482	-12.7545	-12.7594	-11.6771	-13.1456	0.0103245	0.032729	0.0112117	0.038844	-1.08231	-1.46853	0.472271	0.361349
b3417	malP	chr	-	3548101,	3550495,	-12.0875	-12.1788	-12.3372	-11.4973	-11.4046	-11.1044	-12.7975	-12.6498	-12.8447	-12.2141	-11.3729	-12.7497	0.00615833	0.0241099	0.00190488	0.0138746	-0.841123	-1.37672	0.558209	0.385093
b3418	malT	chr	+	3551106,	3553812,	-12.1129	-12.3256	-12.1083	-9.98197	-10.0099	-9.91075	-11.5356	-11.3346	-11.3232	-12.1813	-9.98003	-11.429	0.000219741	0.00333435	0.000576868	0.00721908	-2.2013	-1.44899	0.217442	0.366277
b3430	glgC	chr	-	3566055,	3567351,	-14.1214	-13.9861	-14.1478	-13.1425	-13.002	-12.9865	-14.2304	-14.4911	-14.3395	-14.083	-13.0485	-14.3346	0.000122311	0.00293329	0.000324846	0.00529905	-1.03452	-1.28612	0.488179	0.410052
b3496	yhiP	chr	+	3638884,	3640354,	-12.9902	-12.4646	-12.6988	-11.3545	-11.1822	-11.0516	-12.4649	-12.5525	-12.629	-12.6788	-11.2152	-12.5191	0.00251036	0.0138912	0.000760141	0.00844242	-1.46361	-1.30384	0.362584	0.405048
b3498	prlC	chr	-	3641162,	3643205,	-12.6809	-12.6005	-12.6739	-11.9763	-11.9227	-11.8776	-13.0132	-13.2432	-12.7545	-12.6498	-11.933	-13.0477	4.99842e-05	0.00169588	0.0139122	0.043836	-0.716717	-1.11472	0.608481	0.461782
b3528	dctA	chr	-	3680183,	3681470,	-10.803	-10.824	-10.6946	-8.3945	-8.38041	-8.33027	-10.3308	-10.1813	-10.1916	-10.7663	-8.37564	-10.2551	1.93092e-05	0.00109636	0.000127384	0.00387997	-2.39066	-1.87947	0.190695	0.271783
b3544	dppA	chr	-	3704120,	3705728,	-14.1562	-14.1075	-14.1944	-10.6292	-10.5121	-10.4593	-13.9978	-13.4911	-14.477	-14.1539	-10.543	-13.8492	9.88818e-06	0.000967806	0.00552169	0.0251449	-3.61087	-3.30622	0.0818503	0.101095
b3570	bax	chr	-	3734375,	3735200,	-10.1474	-10.1855	-10.2348	-9.496	-9.48886	-9.65332	-10.5383	-10.4837	-10.4951	-10.1947	-9.52196	-10.5122	0.00211682	0.0121873	0.00151203	0.0126623	-0.672722	-0.990276	0.627322	0.503382
b3603	lldP	chr	+	3775421,	3777077,	-12.2009	-12.2056	-12.0166	-8.68693	-8.70157	-8.66743	-12.3527	-12.1454	-11.8447	-12.1269	-8.68956	-12.1928	0.000237409	0.00345194	0.00177156	0.013533	-3.43732	-3.5032	0.0923131	0.0881926
b3605	lldD	chr	+	3777849,	3779040,	-11.6746	-11.8214	-12.0917	-10.5437	-10.6726	-10.7763	-13.3429	-13.5215	-12.7545	-11.8799	-10.6432	-13.2967	0.00287805	0.0147771	0.00508737	0.0242891	-1.23673	-2.6535	0.424334	0.158934
b3609	secB	chr	-	3781683,	3782151,	-11.1606	-11.1855	-11.2425	-10.3569	-10.4025	-10.484	-11.2903	-11.2057	-11.1842	-11.2011	-10.401	-11.2438	0.000171246	0.00306708	9.03815e-05	0.00320797	-0.800124	-0.842782	0.5743	0.557567
b3672	ivbL	chr	-	3850912,	3851011,	-10.1717	-10.2451	-10.1885	-8.64845	-8.84258	-8.73562	-9.59817	-9.4874	-9.32316	-10.2035	-8.7485	-9.51496	0.0003825	0.00433449	0.00263454	0.0163718	-1.45496	-0.76646	0.364765	0.587858
b3688	yidQ	chr	+	3865750,	3866083,	-13.7858	-13.9631	-13.7852	-11.8753	-11.8702	-11.8908	-13.1773	-13.2948	-12.8447	-13.8447	-11.876	-13.1626	0.000808233	0.00691635	0.0117241	0.0401665	-1.96864	-1.28653	0.255494	0.409937
b3707	tnaC	chr	+	3886457,	3886532,	-12.1129	-11.8796	-12.0218	-9.41146	-9.28717	-9.37123	-12.1345	-12.2559	-12.4413	-11.993	-9.34763	-12.2192	4.47865e-05	0.00169588	0.000189936	0.00443939	-2.6454	-2.87152	0.159829	0.136642
b3708	tnaA	chr	+	3886752,	3888168,	-8.17335	-8.19635	-8.19547	-6.86102	-6.78884	-6.77096	-9.39881	-9.21813	-9.17684	-8.19003	-6.81117	-9.29842	0.000165702	0.00306708	0.000154079	0.00407331	-1.37886	-2.48725	0.384523	0.178346
b3709	tnaB	chr	+	3888258,	3889506,	-12.5365	-12.9069	-12.4885	-10.7328	-10.7208	-10.7282	-13.6944	-13.5525	-13.629	-12.6338	-10.7266	-13.6327	0.00470097	0.0202501	0.000181501	0.00434115	-1.90726	-2.90613	0.266598	0.133404
b3748	rbsD	chr	+	3931373,	3931793,	-9.79266	-9.78426	-10.0231	-8.32861	-8.27908	-8.17715	-9.50387	-9.58827	-9.71143	-9.87615	-8.27634	-9.56275	0.000273494	0.00369217	0.000102751	0.003498	-1.59981	-1.28641	0.329921	0.409971
b3749	rbsA	chr	+	3931800,	3933306,	-14.0543	-13.7906	-13.7328	-11.8206	-12.0531	-12.074	-13.1948	-13.0761	-13.2139	-13.8301	-11.9678	-13.1541	0.000160048	0.00306708	0.000950565	0.00952905	-1.86231	-1.18626	0.275035	0.439441
b3751	rbsB	chr	+	3934300,	3935191,	-10.3239	-10.3992	-10.4633	-9.48134	-9.3891	-9.3014	-10.5189	-10.6795	-10.8682	-10.404	-9.4042	-10.6224	0.000158048	0.00306708	0.00145549	0.0124552	-0.999817	-1.21821	0.500064	0.429817
b3766	ilvL	chr	+	3948344,	3948443,	-8.9717	-8.92214	-8.97218	-7.73276	-7.77839	-7.7179	-8.80249	-8.77919	-8.7328	-8.95449	-7.74981	-8.78373	1.12082e-06	0.000431497	3.45771e-06	0.000902463	-1.20468	-1.03392	0.433867	0.488382
b3809	dapF	chr	+	3992784,	3993609,	-12.3742	-12.1788	-12.1709	-11.8964	-11.708	-11.7763	-12.1177	-12.4037	-12.307	-12.2236	-11.7874	-12.2415	0.00721752	0.0262242	0.0123511	0.041177	-0.436174	-0.454136	0.739092	0.729947
b3832	rmuC	chr	+	4015355,	4016783,	-14.0875	-14.3858	-13.6015	-12.5135	-12.8251	-12.5715	-13.4863	-13.4911	-13.477	-13.9589	-12.6551	-13.4866	0.0150798	0.0413572	0.0123694	0.041177	-1.30384	-0.831531	0.405048	0.561933
b3844	fre	chr	+	4024549,	4025251,	-12.1044	-12.1266	-12.3049	-11.6984	-11.7338	-11.8516	-12.143	-12.3079	-12.155	-12.1883	-11.7427	-12.2015	0.00772637	0.0274988	0.00353824	0.0189109	-0.445582	-0.458804	0.734288	0.727589
b3927	glpF	chr	-	4115267,	4116113,	-11.583	-11.3667	-11.6055	-10.7015	-10.8447	-10.7106	-11.2395	-11.0649	-11.1124	-11.5125	-10.7649	-11.1562	0.00227048	0.0128825	0.00538123	0.0247234	-0.747666	-0.391311	0.595566	0.762437
b3928	yiiU	chr	+	4116537,	4116783,	-11.1214	-10.946	-11.1111	-10.755	-10.7654	-10.6703	-11.2762	-11.3212	-11.477	-11.0542	-10.7427	-11.3203	0.0139507	0.0396091	0.00295338	0.0171554	-0.311462	-0.577573	0.805825	0.67009
b3931	hslU	chr	-	4118438,	4119770,	-11.7456	-11.5697	-11.8583	-10.9358	-11.0052	-11.0007	-12.1177	-12.1454	-12.2139	-11.7236	-10.9787	-12.1414	0.00881201	0.0294863	9.07098e-06	0.00144278	-0.744916	-1.16272	0.596703	0.44667
b3932	hslV	chr	-	4119779,	4120310,	-13.4477	-12.9861	-13.3569	-11.8139	-12.002	-11.5929	-13.7195	-13.9886	-13.551	-13.2379	-11.8459	-13.7821	0.00155011	0.0104461	0.0003709	0.00575079	-1.39203	-1.93621	0.381027	0.261302
b3934	cytR	chr	-	4121453,	4122479,	-13.7858	-13.5653	-13.7852	-12.2201	-12.3477	-12.3552	-13.3429	-13.7907	-13.4066	-13.7052	-12.3013	-13.4974	0.000298791	0.0038267	0.00831623	0.0320769	-1.40391	-1.19608	0.377905	0.436458
b3962	sthA	chr	-	4157412,	4158813,	-12.1044	-12.0215	-12.1139	-10.5217	-10.4944	-10.6037	-12.16	-11.8962	-11.892	-12.0787	-10.5249	-12.0204	4.5149e-06	0.00073072	0.00145185	0.0124552	-1.55377	-1.49547	0.340619	0.354665
b3995	rsd	chr	-	4194354,	4194831,	-13.5365	-13.918	-13.8213	-11.5745	-11.5854	-11.7401	-13.0766	-13.0537	-13.7114	-13.7732	-11.61	-13.1456	0.000633224	0.00590546	0.0127223	0.0417277	-2.1632	-1.53555	0.223261	0.344948
b4000	hupA	chr	+	4198303,	4198576,	-10.1172	-10.109	-10.1694	-9.8324	-9.64906	-9.80097	-10.2832	-10.3482	-10.4066	-10.1347	-9.7427	-10.3239	0.014966	0.0413346	0.00197522	0.0141242	-0.391995	-0.581149	0.762075	0.668431
b4014	aceB	chr	+	4213500,	4215102,	-12.6069	-12.0886	-12.1944	-10.4867	-10.4424	-10.5041	-12.6098	-12.4614	-12.071	-12.25	-10.4702	-12.4654	0.00687434	0.0256789	0.00649962	0.0279627	-1.77975	-1.99517	0.291235	0.250838
b4019	metH	chr	+	4221850,	4225534,	-13.4477	-13.3858	-13.0271	-12.2742	-12.1264	-12.1512	-13.3429	-12.9062	-13.0984	-13.2476	-12.1834	-13.1372	0.00800814	0.0277475	0.0106313	0.0380875	-1.06413	-0.953745	0.478263	0.516291
b4033	malF	chr	-	4241553,	4243098,	-13.7324	-14.2399	-13.6988	-11.4447	-11.6826	-11.6589	-14.4649	-15.1692	-15.2139	-13.8743	-11.587	-14.7821	0.00193783	0.0116717	0.00275746	0.0168761	-2.28728	-3.19509	0.204862	0.10919
b4034	malE	chr	-	4243251,	4244442,	-11.006	-11.0215	-10.9958	-9.87881	-9.97406	-9.8166	-11.8659	-11.8863	-12.1265	-11.0073	-9.9075	-11.9088	0.00131518	0.0093193	0.000172778	0.00422765	-1.0998	-2.00132	0.46658	0.249772
b4035	malK	chr	+	4244806,	4245922,	-12.8699	-12.7805	-12.8772	-10.2673	-10.2495	-10.3014	-13.6455	-13.7186	-13.9915	-12.841	-10.2659	-13.718	7.3724e-06	0.000769678	0.000723069	0.00817529	-2.57512	-3.45206	0.167807	0.091375
b4036	lamB	chr	+	4245993,	4247334,	-10.6809	-10.7333	-10.6946	-9.64548	-9.63562	-9.61182	-12.508	-12.2817	-12.551	-10.7044	-9.63455	-12.429	3.42076e-06	0.00073072	0.000757003	0.00844242	-1.0698	-2.79448	0.476383	0.144138
b4037	malM	chr	+	4247576,	4248497,	-10.0199	-9.9602	-9.93404	-9.07395	-8.96639	-9.10436	-11.0327	-11.1874	-11.155	-9.9649	-9.03108	-11.104	0.000179106	0.00306708	5.76123e-06	0.00128887	-0.933813	-2.07293	0.523473	0.237676
b4040	ubiA	chr	+	4251038,	4251911,	-12.8699	-12.6457	-12.4812	-11.5464	-11.6676	-11.5194	-12.4971	-12.4037	-12.8447	-12.6307	-11.5932	-12.5082	0.00479864	0.0204203	0.010838	0.0384858	-1.03743	-0.914919	0.487193	0.530374
b4055	aphA	chr	+	4267436,	4268150,	-12.8991	-13.1855	-13.2425	-11.2742	-11.1645	-11.2411	-13.2856	-13.1454	-13.4066	-13.1269	-11.2184	-13.2506	0.00157594	0.0105018	0.000273406	0.00498375	-1.90845	-2.03213	0.266379	0.244494
b4077	gltP	chr	+	4292503,	4293817,	-12.3845	-12.7407	-12.6494	-12.0531	-11.9527	-11.7401	-12.4438	-12.6332	-12.5135	-12.6056	-11.9436	-12.5191	0.00917071	0.0301445	0.00835164	0.0321343	-0.662005	-0.575414	0.631999	0.671094
b4089	rpiR	chr	-	4310123,	4311014,	-14.3043	-14.3256	-14.1944	-12.6984	-13.1751	-12.801	-13.7195	-14.4323	-14.2139	-14.2671	-12.912	-14.0089	0.00717801	0.0262242	0.0115607	0.0397018	-1.35501	-1.09681	0.390931	0.467548
b4139	aspA	chr	-	4364913,	4366350,	-9.69518	-9.4974	-9.67182	-8.19105	-8.12812	-8.19338	-9.14085	-9.07189	-9.30303	-9.61459	-8.16335	-9.13823	0.000687152	0.00622012	0.0024196	0.0154657	-1.45125	-0.974887	0.365705	0.50878
b4140	fxsA	chr	+	4366686,	4367163,	-13.7858	-13.7309	-13.7328	-12.2379	-11.971	-12.0296	-14.0288	-14.8282	-14.7989	-13.7456	-12.0745	-14.3736	0.00155424	0.0104461	0.0067942	0.0286194	-1.67113	-2.29912	0.314008	0.203187
b4142	groS	chr	+	4368710,	4369004,	-11.5138	-11.322	-11.3503	-9.77764	-9.83488	-9.77325	-11.8659	-12.0874	-11.9162	-11.3806	-9.80179	-11.9487	0.000515476	0.00510908	0.000404794	0.00590554	-1.57881	-2.14695	0.334758	0.225789
b4143	groL	chr	+	4369047,	4370694,	-9.07913	-8.94458	-8.94705	-7.75663	-7.7929	-7.73711	-9.19481	-9.32457	-9.20643	-8.97914	-7.7687	-9.24152	0.000387502	0.00433449	0.000169087	0.00422765	-1.21045	-1.47282	0.432135	0.360276
b4153	frdB	chr	-	4377805,	4378540,	-12.8273	-13.2261	-13.0917	-11.6146	-11.776	-11.6366	-12.6098	-12.6667	-12.5135	-13.0616	-11.6882	-12.6151	0.00262812	0.0142779	0.00018296	0.00434115	-1.37342	-0.926914	0.385974	0.525982
b4154	frdA	chr	-	4378532,	4380341,	-11.7129	-11.6782	-11.6133	-10.4525	-10.4922	-10.2883	-11.2125	-11.1103	-10.9787	-11.661	-10.4361	-11.1393	0.000502038	0.00506674	0.00174316	0.0134671	-1.22485	-0.703144	0.427842	0.614232
b4171	miaA	chr	+	4397274,	4398225,	-10.7689	-10.6596	-10.8236	-10.073	-10.0711	-9.94127	-10.5217	-10.6838	-10.5605	-10.7508	-10.0457	-10.5833	0.000394018	0.00437543	0.00108488	0.0101678	-0.705121	-0.537659	0.613391	0.688888
b4208	cycA	chr	+	4427886,	4429299,	-13.6069	-13.8959	-14.0166	-11.2834	-11.0369	-10.9585	-13.0766	-13.4037	-13.4066	-13.8594	-11.1054	-13.2325	8.38515e-05	0.00238748	0.0001249	0.00387997	-2.75397	-2.1271	0.148243	0.228918
b4214	cysQ	chr	+	4434777,	4435518,	-13.8699	-13.9631	-13.7852	-12.6146	-12.9286	-12.7521	-13.7975	-14.1692	-13.629	-13.8668	-12.7731	-13.891	0.0014187	0.00978714	0.007921	0.0311542	-1.0937	-1.1179	0.46856	0.460764
b4217	ytfK	chr	+	4437609,	4437816,	-11.0179	-11.0824	-11.1	-9.62923	-9.60433	-9.58748	-11.3092	-11.3619	-11.7545	-11.0723	-9.61005	-11.386	2.08165e-05	0.00109636	0.00533216	0.0246317	-1.46222	-1.77598	0.362934	0.291996
b4221	ytfN	chr	+	4442134,	4445914,	-11.6809	-11.4565	-11.4598	-11.2157	-11.0241	-11.2243	-11.6697	-11.7632	-11.551	-11.5125	-11.1295	-11.6839	0.0193623	0.0491432	0.00489043	0.0234202	-0.383079	-0.554408	0.766799	0.680936
b4239	treC	chr	-	4461076,	4462732,	-9.53077	-9.73699	-9.68423	-9.04329	-9.12983	-9.13735	-9.81089	-9.82345	-9.73819	-9.66059	-9.09912	-9.80439	0.00467897	0.0202411	7.68232e-05	0.00297545	-0.561463	-0.70527	0.677615	0.613328
b4240	treB	chr	-	4462781,	4464203,	-8.24171	-8.25735	-8.25357	-6.59117	-6.61329	-6.5778	-7.63536	-7.68326	-7.53445	-8.25181	-6.59828	-7.63678	1.65325e-06	0.000431497	0.00112447	0.0103584	-1.65353	-1.0385	0.317862	0.486833
b4252	yjgK	chr	+	4472884,	4473337,	-11.4694	-11.5872	-11.7242	-10.8006	-11.0305	-10.8776	-11.5694	-11.4108	-11.4413	-11.6072	-10.9134	-11.492	0.00236245	0.0133079	0.0033393	0.0180946	-0.693848	-0.578636	0.618203	0.669596
b4310	yjhT	chr	-	4535681,	4536788,	-15.1214	-15.2965	-14.6015	-12.9249	-13.161	-13.074	-16.0929	-16.4911	-17.7989	-14.9432	-13.0542	-16.3935	0.00653769	0.0248496	0.0170529	0.0492067	-1.88892	-3.33928	0.270008	0.0988046
b4314	fimA	chr	+	4541137,	4541686,	-11.9213	-11.5395	-11.6413	-10.7046	-10.8962	-10.6874	-11.7006	-11.8473	-11.9409	-11.6707	-10.7826	-11.7854	0.00451098	0.0197877	0.000389148	0.00586364	-0.888078	-1.00276	0.540334	0.499046
b4322	uxuA	chr	+	4549658,	4550843,	-14.3845	-14.1855	-14.3972	-13.0142	-13.3718	-13.2666	-14.3044	-14.2181	-13.9915	-14.317	-13.212	-14.2236	0.00185375	0.011429	0.00266017	0.0164657	-1.10498	-1.01159	0.46491	0.495999
b4323	uxuB	chr	+	4550923,	4552384,	-13.8133	-13.6549	-13.7675	-12.7108	-12.905	-12.5929	-13.8799	-13.6167	-13.477	-13.7388	-12.7684	-13.718	0.00223015	0.0126997	0.00427711	0.0216063	-0.970411	-0.949557	0.510361	0.517791
b4352	yjiA	chr	-	4585931,	4586888,	-14.3845	-14.2399	-14.5401	-13.229	-13.3239	-12.931	-14.5524	-14.4323	-14.9915	-14.3899	-13.2056	-14.5634	0.00162114	0.0105675	0.00297093	0.0171678	-1.18431	-1.35784	0.440036	0.390167
b4359	mdoB	chr	-	4595172,	4597464,	-11.0502	-11.0917	-10.9452	-10.6381	-10.7338	-10.631	-10.845	-10.8912	-10.9915	-11.0217	-10.6782	-10.8822	0.00347521	0.0170068	0.0131786	0.042728	-0.34355	-0.204042	0.7881	0.868115
b4376	osmY	chr	+	4609418,	4610024,	-14.7589	-15.3554	-14.8032	-13.8409	-13.8702	-13.6589	-15.6455	-16.0761	-15.7989	-14.9589	-13.8163	-15.8086	0.0169328	0.0446409	0.000696313	0.00801784	-1.1426	-1.99222	0.452942	0.251351
b4392	slt	chr	+	4628755,	4630693,	-13.4052	-13.3858	-13.4108	-12.5354	-12.6978	-12.489	-13.4649	-13.4323	-13.551	-13.4006	-12.5953	-13.4654	0.00527866	0.0217536	0.000872727	0.0093609	-0.805307	-0.87008	0.57224	0.547117
b4397	creA	chr	+	4633543,	4634017,	-14.7589	-14.8529	-14.5401	-13.8684	-13.8475	-13.6589	-14.4649	-14.7542	-14.7989	-14.6985	-13.8163	-14.6093	0.00187405	0.0115089	0.00378658	0.0197659	-0.882212	-0.792916	0.542535	0.577176
b4411	ecnB	chr	+	4374575,	4374722,	-11.5194	-11.6596	-11.4812	-10.1321	-10.2588	-10.2581	-11.7579	-12.1336	-11.966	-11.5509	-10.2112	-11.9124	6.36826e-05	0.00191783	0.0014054	0.0121594	-1.33965	-1.70119	0.395118	0.307532
b4480	hdfR	chr	-	3945150,	3945990,	-14.8133	-14.6549	-15.2671	-13.5027	-13.8475	-14.1354	-14.7975	-14.6838	-15.2139	-14.9121	-13.759	-14.8086	0.0138976	0.0396091	0.0122093	0.0411676	-1.15314	-1.04956	0.449645	0.483116

## Sheet: (WT, C) > M
# Note: These are taken only from the case where both comparisons are significant						Replicates Separate									Replicates Combined									Fold Change
Name	Name2	Chr	Strand	Start	End	WT_1	WT_2	WT_3	M_1	M_2	M_3	C_1	C_2	C_3	WT_(1,2,3)	M_(1,2,3)	C_(1,2,3)	WT/M p-value	WT/M BH q-value	C/M p-value	C/M BH q-value	WT – M	C – M	WT/ M	C / M
b0023	rpsT	chr	-	20814,	21078,	-6.55648	-6.5784	-6.54908	-7.24519	-7.24643	-7.24426	-6.90198	-6.84729	-6.98191	-6.56111	-7.24556	-6.89357	0.000154335	0.00306708	0.0133317	0.0428694	0.684447	0.35199	1.60709	1.27632
b0058	rluA	chr	-	59686,	60346,	-12.7324	-13.1722	-12.9855	-13.5244	-13.9168	-13.9585	-12.8519	-12.7907	-12.9409	-12.9749	-13.7684	-12.8424	0.0114268	0.0350869	0.0143742	0.0447516	0.793522	0.926052	1.7333	1.90007
b0059	hepA	chr	-	60357,	63264,	-11.9064	-11.7604	-11.5937	-13.2834	-13.5807	-13.2666	-11.53	-11.7452	-11.5701	-11.727	-13.4037	-11.6093	0.000308697	0.00386735	0.000339246	0.0054769	1.67679	1.79449	3.19715	3.46892
b0114	aceE	chr	+	123016,	125680,	-9.50114	-9.64687	-9.60448	-10.3545	-10.2987	-10.2839	-9.30088	-9.22436	-9.14425	-9.59137	-10.3158	-9.24943	0.000720831	0.0064067	0.000289039	0.00508578	0.724477	1.06641	1.6523	2.09422
b0125	hpt	chr	+	141430,	141967,	-11.7324	-11.8529	-11.9703	-12.3594	-12.4381	-12.6146	-11.9013	-11.9062	-11.7989	-11.865	-12.4408	-11.8875	0.00383757	0.018047	0.00665905	0.0281952	0.575865	0.553335	1.49057	1.46747
b0159	mtn	chr	-	178454,	179153,	-11.4369	-11.5395	-11.5667	-11.8006	-11.7814	-11.6817	-11.3975	-11.3212	-11.3895	-11.5228	-11.7684	-11.3687	0.011405	0.0350869	0.00179265	0.0136226	0.245649	0.39971	1.18563	1.31924
b0169	rpsB	chr	+	189873,	190599,	-7.97654	-7.94705	-8.04361	-8.23509	-8.12427	-8.18524	-7.84285	-7.92066	-7.87408	-7.99214	-8.1756	-7.87476	0.0112929	0.0348811	0.002324	0.015185	0.183463	0.300842	1.13561	1.23186
b0170	tsf	chr	+	190856,	191708,	-8.31962	-8.37239	-8.34251	-8.50541	-8.55749	-8.55697	-8.08884	-8.06558	-8.21393	-8.34682	-8.5382	-8.09814	0.00114081	0.00854324	0.00619436	0.0269455	0.191382	0.440063	1.14186	1.35666
b0171	pyrH	chr	+	191854,	192580,	-12.006	-11.8689	-12.0972	-12.7874	-12.5346	-12.5504	-11.8042	-11.7452	-11.7328	-11.991	-12.6249	-11.7723	0.00438868	0.0195343	0.00590587	0.026131	0.633911	0.852624	1.55177	1.80578
b0180	fabZ	chr	+	202100,	202556,	-10.8484	-10.7654	-10.7157	-11.265	-11.3799	-11.2666	-10.9267	-10.7363	-10.7545	-10.7663	-11.315	-10.8304	0.000628827	0.00590546	0.00416724	0.0213265	0.54869	0.48455	1.46276	1.39915
b0194	proS	chr	-	217056,	218775,	-9.81506	-9.81493	-9.81903	-10.2379	-10.4856	-10.328	-9.71473	-9.83056	-9.6956	-9.81658	-10.3605	-9.75207	0.0178398	0.0461008	0.00434487	0.0216504	0.543875	0.60838	1.45788	1.52455
b0211	mltD	chr	-	232596,	233955,	-8.63724	-8.65378	-8.58933	-9.20796	-9.26161	-9.26448	-8.62015	-8.5933	-8.50657	-8.62379	-9.24238	-8.59334	2.1003e-05	0.00109636	0.000375133	0.0057594	0.618589	0.649039	1.53537	1.56812
b0238	gpt	chr	+	255976,	256435,	-12.0625	-11.8059	-12.2062	-13.3594	-13.3083	-13.1044	-11.9524	-12.2817	-12.2753	-12.0197	-13.2843	-12.1081	0.00171566	0.0107955	0.00187119	0.0136929	1.26467	1.1762	2.40273	2.25981
b0336	codB	chr	+	354145,	355405,	-13.247	-13.133	-13.0917	-14.7108	-15.4552	-15.6589	-13.267	-13.9062	-13.155	-13.1448	-15.1678	-13.4445	0.0160654	0.0433793	0.00871159	0.0329525	2.023	1.7233	4.06429	3.30191
b0337	codA	chr	+	355394,	356678,	-13.0219	-13.6005	-13.3437	-14.6146	-14.2625	-14.1354	-13.0766	-12.9062	-12.629	-13.3323	-14.3534	-12.9414	0.0105353	0.0330628	0.00169148	0.0134313	1.02106	1.41197	2.02941	2.661
b0436	tig	chr	+	454356,	455655,	-8.02642	-8.00223	-8.0205	-8.20961	-8.23142	-8.19644	-7.86455	-7.89807	-7.886	-8.01565	-8.21663	-7.87958	0.000187065	0.00308155	2.0364e-05	0.00177167	0.200974	0.337048	1.14947	1.26317
b0448	mdlA	chr	+	468094,	469867,	-12.5138	-12.1524	-12.2242	-12.8684	-13.2328	-13.0442	-12.186	-12.3212	-12.4066	-12.2671	-13.0542	-12.2642	0.00793369	0.0277473	0.00685487	0.0287794	0.787186	0.790005	1.7257	1.72908
b0469	apt	chr	+	490635,	491187,	-11.9138	-11.8905	-12.2425	-12.9838	-12.8251	-12.801	-11.8659	-11.9366	-11.551	-12.0259	-12.876	-11.8389	0.00706004	0.0260142	0.00429671	0.0216355	0.850179	1.03711	1.80272	2.05211
b0470	dnaX	chr	+	491315,	493247,	-11.2009	-10.9861	-10.9402	-11.4293	-11.6776	-11.6932	-11.0171	-10.9781	-10.966	-11.0197	-11.5849	-10.9955	0.00903639	0.0300098	0.0164425	0.0483094	0.565271	0.589428	1.47967	1.50465
b0477	gsk	chr	+	499348,	500653,	-12.5138	-12.7604	-12.4108	-13.6862	-13.8251	-13.7048	-12.4649	-12.6004	-12.307	-12.5509	-13.7497	-12.4866	0.00298813	0.0151929	0.000908927	0.00942635	1.19881	1.26303	2.29551	2.4
b0522	purK	chr	-	550749,	551817,	-13.1562	-12.683	-13.1478	-14.2469	-14.1751	-13.8516	-12.771	-13.3482	-12.7545	-12.9709	-14.131	-12.9487	0.00619723	0.0241414	0.0123082	0.041177	1.16009	1.18223	2.23472	2.26928
[truncated: 197 more rows]
