# Supplementary material for: The conserved GTPase LepA contributes mainly to translation initiation in Escherichia coli
Source: Oxford University Press journal article supplement (doi:10.1093/nar/gku1098), 2014-11-06
Supplement: gku1098_Supplementary_Data.zip [file gku1098_Supplementary_Data.zip › nar-02711-v-2014-File013.xls]

## Sheet: All
Ribosome Footprints / Total RNA (Average Ribosome Density)
WT = wild-type control strain
M = ΔlepA mutant strain						Log Base 2 of Normalized Coverages
C = ΔlepA(pLEPA) complemented strain						Replicates Separate									Replicates Combined									Fold Change
Name	Name2	Chr	Strand	Start	End	WT_1	WT_2	WT_3	M_1	M_2	M_3	C_1	C_2	C_3	WT_(1,2,3)	M_(1,2,3)	C_(1,2,3)	WT/M p-value	WT/M BH q-value	C/M p-value	C/M BH q-value	WT – M	C – M	WT/ M	C / M
Below are those genes significant in both WT/M and C/M comparisons
b2000	flu	chr	+	2069562	2072682	1.48749	1.24906	1.56418	5.34547	5.79483	5.49157	2.8313	2.98801	2.60758	1.42241	5.56286	2.85217	3.30192e-05	0.00144605	0.000113945	0.00199605	-4.14045	-2.71068	0.0567023	0.152758
b1223	narK	chr	+	1277179	1278571	-0.223851	-0.159104	-0.320703	3.05371	2.57358	2.01995	-2.08162	-2.21218	-2.10102	-0.237099	2.5823	-2.10421	0.00992621	0.0267756	0.00353123	0.0142566	-2.8194	-4.68651	0.141669	0.0388346
b3654	yicE	chr	+	3826967	3828359	-1.67204	-1.30223	-1.08522	1.21493	1.47356	1.52059	0.254241	0.00271083	-0.652277	-1.33982	1.39082	-0.0281991	0.000626681	0.00531671	0.0201942	0.0429678	-2.73064	-1.41902	0.150659	0.373966
b3364	tsgA	chr	+	3490589	3491771	-0.669043	-0.757765	-0.541911	1.99712	1.96235	2.19867	-2.10636	-1.68219	-1.06555	-0.657626	2.01457	-1.76277	1.21284e-05	0.000870237	0.0046472	0.0167953	-2.6722	-3.77734	0.156887	0.0729303
b1475	fdnH	chr	+	1548484	1549369	-0.53652	-0.552793	-0.104372	2.39766	1.82544	3.28141	-1.19772	-0.851709	-1.29214	-0.387505	2.22233	-1.09346	0.0131541	0.0323742	0.00844533	0.0240902	-2.60983	-3.31579	0.163819	0.100426
b3476	nikA	chr	+	3611689	3613264	1.79823	1.55194	1.33761	4.43453	3.38183	4.86637	-0.870762	-0.709153	-0.90685	1.53102	3.94294	-0.811216	0.019216	0.0423411	0.00668961	0.0209332	-2.41192	-4.75416	0.187906	0.0370558
b2066	udk	chr	-	2140330	2140972	0.0745266	0.211009	0.536849	2.93476	2.40794	2.97516	0.499589	0.762286	0.715783	0.295673	2.68578	0.650848	0.000588297	0.00524536	0.00260314	0.0118898	-2.39011	-2.03494	0.190768	0.244019
b1109	ndh	chr	+	1165307	1166612	0.780262	1.16899	1.28714	3.39036	3.70006	3.09034	0.280445	-0.0699162	0.06845	1.09846	3.46698	0.0944893	0.00063654	0.00531671	0.000347208	0.00351916	-2.36852	-3.37249	0.193644	0.096556
b2508	guaB	chr	-	2630625	2632092	1.78612	1.88231	1.94683	4.24792	4.09066	4.20922	1.59516	1.68869	1.66089	1.87692	4.17163	1.63995	4.09172e-06	0.000611074	1.14696e-05	0.00062948	-2.29471	-2.53168	0.203809	0.172938
b0113	pdhR	chr	+	122091	122856	-2.63495	-2.79542	-2.57999	0.184468	-0.794489	-0.135921	-1.98908	-2.21041	-2.21328	-2.66101	-0.370981	-2.12922	0.0108891	0.0286614	0.0174427	0.0391148	-2.29003	-1.75823	0.204471	0.29561
b0898	ycaD	chr	+	945093	946242	-2.43972	-2.60896	-2.36028	-0.4451	0.180921	-0.981906	-2.06095	-2.13231	-2.50996	-2.48897	-0.255364	-2.18119	0.0216176	0.0461817	0.0202404	0.0429928	-2.2336	-1.92583	0.212627	0.263189
b2476	purC	chr	-	2594926	2595640	1.05274	1.03987	1.02183	3.27456	3.11023	3.04714	1.6594	1.4944	1.51538	1.03088	3.16249	1.58771	0.000867499	0.00594287	7.93568e-05	0.00162866	-2.13161	-1.57478	0.228203	0.335694
b2499	purM	chr	+	2619218	2620256	0.363169	0.766272	0.274124	3.16035	2.24784	2.46504	1.03075	0.735999	1.08049	0.449082	2.5771	0.925121	0.00563658	0.0181274	0.0158764	0.0365943	-2.12802	-1.65198	0.228772	0.318204
b0877	ybjX	chr	-	917350	918343	-0.154607	0.0333737	0.0330136	1.94943	2.16098	2.16396	0.250452	0.33499	0.57458	-0.025169	2.08164	0.32662	2.66758e-05	0.00136967	0.000247037	0.00306532	-2.10681	-1.75502	0.23216	0.296269
b1227	narI	chr	+	1285071	1285749	-1.00029	-0.592373	-0.457229	1.09023	1.66872	1.52059	-1.16828	-1.14412	-1.58784	-0.681814	1.41751	-1.26385	0.000912643	0.00606649	0.000324073	0.00337444	-2.09932	-2.68136	0.233368	0.155895
b1126	potA	chr	-	1183680	1184817	-0.739232	-0.556726	-0.808529	1.17425	1.43623	1.73067	-0.195174	-0.469818	-0.498948	-0.711259	1.38588	-0.363848	0.00158597	0.00840395	0.00154303	0.00876934	-2.09714	-1.74973	0.233721	0.297357
b1131	purB	chr	-	1189838	1191209	0.949037	0.684982	0.840946	2.75968	2.89491	3.05959	0.809609	0.995401	0.908438	0.814066	2.87827	0.892329	6.28104e-05	0.00195517	0.000145788	0.00226124	-2.06421	-1.98594	0.239118	0.252448
b4064	yjcD	chr	+	4276501	4277851	-0.0287963	-0.180083	-0.382469	1.87763	1.94407	1.41391	-0.304753	-0.158624	-0.1468	-0.23161	1.81853	-0.223933	0.00139571	0.00775454	0.00420073	0.0160382	-2.05014	-2.04246	0.241461	0.242749
b0522	purK	chr	-	550749	551817	-0.627805	-1.15287	-0.56431	1.25212	1.2529	0.786489	-0.30703	0.134214	-0.480924	-0.808951	1.16426	-0.223603	0.00170917	0.00880605	0.00583357	0.0191164	-1.97321	-1.38787	0.254685	0.38213
b0477	gsk	chr	+	499348	500653	-0.212005	-0.0206826	-0.380465	1.65364	1.85836	1.7229	0.27633	0.338934	0.115683	-0.211797	1.75899	0.275942	0.000347515	0.00423267	7.9847e-05	0.00162866	-1.97079	-1.48305	0.255114	0.357733
b2533	suhB	chr	+	2661463	2662267	0.362759	0.0865221	0.26119	2.24609	2.11455	2.17646	-1.01097	-1.06218	-1.3325	0.221415	2.17813	-1.07723	0.000297067	0.00394941	0.000223028	0.00293884	-1.95671	-3.25536	0.257615	0.104723
b0835	yliG	chr	-	875932	877258	1.22969	0.754726	1.1345	3.52902	2.65474	2.74462	0.903811	1.36657	0.891316	1.02076	2.94247	1.05949	0.00839164	0.0238101	0.00791112	0.023234	-1.92171	-1.88297	0.263942	0.271125
b4006	purH	chr	-	4203965	4205555	1.44961	1.87047	1.36513	3.174	3.84231	3.25099	1.60749	1.42685	1.36119	1.53438	3.4544	1.49782	0.00283704	0.012001	0.00632898	0.0200935	-1.92002	-1.95658	0.26425	0.257639
b1676	pykF	chr	+	1753721	1755134	1.88912	1.74818	1.89677	3.6108	3.77225	3.82931	2.00178	1.88732	2.13373	1.84	3.72113	1.97238	3.94478e-05	0.00154573	6.03804e-05	0.00151087	-1.88113	-1.74875	0.271472	0.29756
b0945	pyrD	chr	+	1003990	1005001	1.08278	1.23057	1.12319	3.12503	2.87069	3.02874	1.0107	0.645323	0.625975	1.14692	2.98581	0.798454	0.000125094	0.00257134	0.000374156	0.00371412	-1.83889	-2.18736	0.279536	0.219553
b2579	yfiD	chr	-	2714087	2714471	1.93737	1.83078	2.07495	3.90565	3.89843	3.3513	-0.156099	-0.395566	-0.24513	1.95889	3.76464	-0.254537	0.00512997	0.0171477	0.000664924	0.00506721	-1.80575	-4.01917	0.286032	0.0616749
b1628	rsxB	chr	+	1704371	1704950	-1.56384	-1.78161	-1.75631	0.188722	-0.00106199	0.11317	-1.90567	-1.94522	-1.49181	-1.71745	0.0760869	-1.91171	4.81808e-05	0.00170812	0.00246502	0.0117642	-1.79354	-1.9878	0.288464	0.252123
b1474	fdnG	chr	+	1545424	1548472	-0.619171	-0.306495	-0.389843	1.52422	1.18316	1.45396	-2.0733	-2.18979	-2.45688	-0.421967	1.344	-2.17732	0.000212378	0.00338454	2.0509e-05	0.000863387	-1.76597	-3.52132	0.29403	0.0870918
b0904	focA	chr	-	952831	953689	-0.578524	-0.694692	-0.844393	0.920819	1.09377	1.03115	-1.72601	-1.75577	-1.53762	-0.7286	1.01646	-1.71692	0.000135496	0.00269004	1.26484e-05	0.000639852	-1.74506	-2.73338	0.298321	0.150373
b1722	ydiY	chr	-	1803348	1804107	-1.62409	-1.86377	-1.55745	0.206915	0.0405407	-0.180561	-1.41757	-1.47391	-1.47033	-1.68021	0.061965	-1.46919	0.000369374	0.00426355	0.00481143	0.017046	-1.74218	-1.53116	0.298918	0.346
b0699	ybfA	chr	+	728356	728563	-3.15324	-3.30271	-3.48829	-1.71903	-1.62775	-1.28893	-2.81921	-2.85469	-2.72666	-3.32773	-1.6024	-2.79538	0.000621822	0.00531671	0.00689674	0.0210005	-1.72532	-1.19298	0.302431	0.4374
b3714	yieG	chr	-	3893294	3894632	-0.598858	-0.66772	-0.605883	1.23253	1.09686	0.884102	-0.907493	-0.848018	-1.29094	-0.622172	1.09343	-0.968982	0.0025119	0.0111481	0.000433305	0.00407127	-1.7156	-2.06241	0.304475	0.239415
b1281	pyrF	chr	+	1339944	1340682	0.662479	0.55847	0.754615	2.56344	2.2354	2.2235	0.40016	0.444779	0.120842	0.659973	2.34528	0.364065	0.000932941	0.00606649	0.000189001	0.0026183	-1.68531	-1.98122	0.310936	0.253276
b3162	deaD	chr	-	3303992	3305882	0.0357939	-0.0476073	0.186654	1.61317	1.83068	1.7628	-0.9409	-0.871855	-0.927911	0.0649572	1.73776	-0.904731	5.96422e-05	0.00195517	0.000183323	0.00257517	-1.67281	-2.64249	0.313643	0.160151
b3260	dusB	chr	+	3408301	3409267	-4.19549	-4.05023	-4.0249	-2.44289	-2.49531	-2.10952	-5.3642	-5.36724	-5.9173	-4.08442	-2.41517	-5.52051	0.00145346	0.00804535	0.000319186	0.0033707	-1.66925	-3.10534	0.314417	0.116198
b0059	hepA	chr	-	60357	63264	0.776393	0.627729	0.538678	2.18961	2.462	2.10428	-0.250567	-0.00117686	-0.221782	0.61793	2.28704	-0.165113	0.000570783	0.00524536	0.000103777	0.00185266	-1.66911	-2.45215	0.314447	0.182738
b3365	nirB	chr	+	3492032	3494576	1.08782	1.68196	1.64409	3.4725	3.13735	2.79813	-0.335034	-0.462828	-0.550249	1.49028	3.15351	-0.412997	0.00368371	0.0140052	0.00134357	0.00794039	-1.66323	-3.56651	0.315732	0.0844062
b3648	gmk	chr	+	3819450	3820074	-1.24145	-1.16805	-1.00993	0.577696	0.414033	0.587709	-0.680922	-0.446415	-0.603967	-1.13159	0.503702	-0.570951	6.10543e-05	0.00195517	0.000306247	0.00330358	-1.6353	-1.07465	0.321904	0.474785
b2014	yeeF	chr	-	2083727	2085086	-0.0914703	-0.14302	-0.112344	1.44167	1.55281	1.41137	-1.1726	-1.10052	-1.43592	-0.12073	1.49155	-1.20066	0.000213665	0.00338454	0.000308394	0.00330358	-1.61228	-2.69221	0.327081	0.154726
b3261	fis	chr	+	3409292	3409589	0.615914	0.684322	0.644148	2.17012	2.31513	2.21362	-0.263914	-0.224063	0.0544567	0.651051	2.24811	-0.209919	9.47127e-05	0.00229328	0.000398207	0.00387536	-1.59706	-2.45803	0.330551	0.181995
b2557	purL	chr	-	2689677	2693565	0.0490954	0.186898	-0.124394	1.4833	1.57087	1.88023	0.253599	0.0193575	-0.178854	0.0166419	1.59377	0.0854579	0.000643791	0.00531671	0.000749657	0.00534449	-1.57713	-1.50832	0.335148	0.351521
b0911	rpsA	chr	+	961217	962891	-0.536577	-0.618577	-0.491447	1.04478	1.03776	0.938836	0.0274996	0.0928391	0.133408	-0.54311	1.02663	0.0685305	7.08463e-06	0.000635393	3.97581e-05	0.00123333	-1.56974	-0.958098	0.336869	0.514735
b0238	gpt	chr	+	255976	256435	1.38257	1.14562	1.5819	2.97881	2.9051	2.76259	0.831723	1.12067	1.1426	1.36233	2.89795	0.971336	0.00186814	0.00924141	0.000285811	0.00324765	-1.53561	-1.92661	0.344933	0.263046
b2559	tadA	chr	-	2695375	2695879	-3.14541	-2.86608	-3.53874	-1.79826	-1.87561	-0.993978	-3.45522	-3.61004	-4.30233	-3.2171	-1.70453	-3.62955	0.0119274	0.0303071	0.00442601	0.0164347	-1.51257	-1.92502	0.350485	0.263337
b0415	ribE	chr	+	433870	434341	0.0689455	0.134153	0.0298468	1.76313	1.46365	1.54159	0.509048	0.510563	0.0495612	0.0702223	1.58119	0.427474	0.00153407	0.00824631	0.00484088	0.017046	-1.51096	-1.15371	0.350877	0.449467
b4469	ygiQ	chr	-	3156948	3159168	-0.394935	-0.372044	-0.701889	0.969938	0.894482	1.15311	-1.13536	-0.958982	-1.33724	-0.508508	0.974848	-1.12384	0.000559627	0.00524078	0.000178467	0.00254808	-1.48336	-2.09869	0.357656	0.233471
b4108	yjdM	chr	-	4324421	4324757	2.03771	1.47993	1.76886	3.16883	3.06687	3.5986	1.39711	1.3728	2.07466	1.71688	3.19419	1.44765	0.00270585	0.0117598	0.00569516	0.0188447	-1.4773	-1.74654	0.359159	0.298016
b2507	guaA	chr	-	2628979	2630557	1.53729	1.61345	1.52956	2.95576	3.01122	3.19963	0.537629	0.565936	0.490408	1.55846	3.02798	0.539442	0.000869651	0.00594287	0.000347426	0.00351916	-1.46952	-2.48854	0.361102	0.178186
b0636	ybeA	chr	-	667470	667938	-1.7088	-1.83869	-1.24082	-0.313401	-0.0363093	-0.0326589	-1.36007	-1.66607	-1.93647	-1.59663	-0.14933	-1.57878	0.00563666	0.0181274	0.00345327	0.0141262	-1.4473	-1.42945	0.366707	0.371272
b2312	purF	chr	-	2426742	2428260	-0.341115	-0.0617194	-0.193349	1.20705	1.31609	1.2687	-0.0950016	-0.00599388	-0.231541	-0.186464	1.25762	-0.0853221	0.000998983	0.0063029	0.00041488	0.00395576	-1.44408	-1.34294	0.367526	0.394216
b3728	pstS	chr	-	3908507	3909548	0.314583	0.898427	0.94621	2.66766	1.83628	2.22841	0.360227	0.176549	0.0871267	0.740711	2.17195	0.24255	0.00894627	0.0250866	0.00816002	0.023547	-1.43124	-1.9294	0.370812	0.262538
b2620	smpB	chr	+	2752917	2753400	0.135537	0.248783	-0.159054	1.18072	1.8427	1.40075	-0.0206136	0.326166	0.282184	0.0702816	1.49939	0.157089	0.00636124	0.0198377	0.00927577	0.0256245	-1.42911	-1.3423	0.371361	0.394391
b0819	ybiS	chr	-	854046	854967	0.0174459	0.0898849	0.217806	1.54393	1.57123	1.49402	-0.352589	-0.164501	-0.271568	0.119106	1.53714	-0.264024	0.000478798	0.00498552	0.000179684	0.00254808	-1.41804	-1.80117	0.374221	0.286942
b2527	hscB	chr	-	2656973	2657489	-0.0128066	-0.682076	0.00682446	1.14334	1.02533	1.53389	-0.253591	0.101073	-0.621447	-0.245496	1.15351	-0.191859	0.00839511	0.0238101	0.0058129	0.0191069	-1.39901	-1.34537	0.37919	0.393553
b3230	rpsI	chr	-	3375836	3376229	-0.498982	-0.534115	-0.413204	0.860494	0.984646	0.827861	-0.318977	-0.320216	-0.284287	-0.475072	0.9167	-0.306701	3.85505e-05	0.00154573	0.000915353	0.00610353	-1.39177	-1.2234	0.381096	0.428272
b3965	trmA	chr	-	4160192	4161293	-1.15007	-1.19096	-1.01336	0.559943	0.147883	0.0948309	-0.875352	-0.653989	-0.914887	-1.10614	0.277803	-0.808662	0.00577867	0.0184645	0.00674123	0.020951	-1.38394	-1.08646	0.383171	0.470914
b2960	trmI	chr	-	3100154	3100874	-0.362393	-0.198916	-0.646349	1.09992	0.872727	0.835674	0.305289	0.171265	0.0931505	-0.432218	0.94847	0.227485	0.00202367	0.00975158	0.00258519	0.0118863	-1.38069	-0.720985	0.384036	0.606683
b2313	cvpA	chr	-	2428296	2428785	-2.22992	-1.61128	-1.9011	-0.0517869	-0.734284	-0.801333	-2.02766	-1.9128	-2.18023	-1.90039	-0.520998	-1.99293	0.0117431	0.0299408	0.0167164	0.0379431	-1.37939	-1.47193	0.384382	0.3605
b2684	mprA	chr	+	2808791	2809322	0.58772	0.397701	0.340326	1.80364	1.74565	1.91545	1.1979	1.03712	1.08699	0.429222	1.80083	1.11252	0.000252473	0.00369356	0.000493273	0.00447856	-1.37161	-0.688316	0.386459	0.620578
b3612	gpmM	chr	+	3783282	3784827	1.39939	1.31865	1.3495	2.80841	2.69036	2.55597	1.3406	1.38698	1.35695	1.35551	2.70896	1.35976	0.00136801	0.00774513	0.00230177	0.0113879	-1.35345	-1.3492	0.391354	0.392509
b1062	pyrC	chr	-	1120783	1121830	1.21524	1.57675	1.63363	2.90518	2.81444	2.81639	0.888863	0.809038	0.785346	1.49582	2.84925	0.845437	0.00672392	0.0203909	1.29959e-06	0.000228871	-1.35343	-2.00381	0.391361	0.249341
b0842	cmr	chr	+	882895	884128	-1.38241	-1.592	-1.05563	-0.177052	0.157517	-0.0547817	-1.39109	-1.5582	-1.30419	-1.35296	-0.0102089	-1.37847	0.00380971	0.0141111	0.000497242	0.00448723	-1.34275	-1.36826	0.394269	0.387357
b1629	rsxC	chr	+	1704942	1707165	-1.84781	-1.58272	-1.85225	-0.572465	-0.31575	-0.261405	-2.57721	-2.16486	-2.70754	-1.75084	-0.414415	-2.4468	0.000474326	0.00497374	0.00111786	0.0069644	-1.33643	-2.03239	0.396	0.24445
b3305	rplF	chr	-	3443628	3444162	-0.36897	-0.274942	-0.363009	0.953234	1.02101	1.01587	0.370989	0.359491	0.374987	-0.337379	0.998634	0.368304	9.51918e-06	0.000746003	0.000774656	0.00546665	-1.33601	-0.63033	0.396114	0.646028
b0859	rumB	chr	+	897740	898868	-1.53484	-1.63012	-1.70337	-0.196072	-0.183365	-0.670704	-1.79548	-2.00294	-2.13567	-1.62384	-0.289266	-1.88381	0.010306	0.0276499	0.00215781	0.0110784	-1.33457	-1.59454	0.396509	0.331127
b0847	ybjL	chr	-	887356	889042	-1.41911	-1.18135	-1.3381	0.203574	-0.114882	-0.0894587	-1.36806	-1.29314	-1.78132	-1.30903	0.0103319	-1.42408	0.000837811	0.00589771	0.00218244	0.0110784	-1.31936	-1.43441	0.400713	0.369997
b3806	cyaA	chr	+	3989175	3991722	-3.21822	-3.21932	-3.23895	-2.025	-1.87166	-1.88887	-2.84913	-2.65271	-2.60519	-3.22596	-1.91534	-2.72189	0.00116277	0.00706681	0.00186888	0.0101192	-1.31062	-0.806551	0.403147	0.571747
b2081	yegQ	chr	+	2163691	2165053	0.245054	0.564595	0.265127	1.64181	1.6328	1.78466	0.0446167	-0.417823	-0.301423	0.356843	1.66453	-0.203398	0.0017073	0.00880605	0.00236452	0.0114683	-1.30768	-1.86793	0.403969	0.273967
b3982	nusG	chr	+	4175765	4176311	-0.441435	-0.433987	-0.543527	0.822388	0.793135	0.683025	-0.449107	-0.548531	-0.582507	-0.484215	0.786324	-0.502368	3.02432e-05	0.00144605	2.51993e-05	0.000962096	-1.27054	-1.28869	0.414505	0.409322
b3871	typA	chr	+	4056429	4058253	0.190577	0.145652	0.265768	1.41615	1.50169	1.50536	-0.355966	-0.316336	-0.298287	0.202258	1.46908	-0.334607	1.30387e-05	0.000870237	7.37764e-06	0.000512569	-1.26682	-1.80369	0.415574	0.286441
b0680	glnS	chr	+	705315	706980	-0.16919	-0.210243	0.0457621	1.20908	1.12148	1.15341	0.654769	0.64833	0.556496	-0.105008	1.16142	0.638345	0.00186123	0.00923789	0.000241962	0.00305323	-1.26642	-0.523072	0.415689	0.695889
b1627	rsxA	chr	+	1703790	1704372	-2.4324	-2.53909	-2.37383	-1.28943	-1.32791	-0.638103	-2.33726	-2.15333	-2.99612	-2.45498	-1.20464	-2.42033	0.0218511	0.0464617	0.0147946	0.0350784	-1.25034	-1.21569	0.420348	0.430569
b1207	prs	chr	-	1260150	1261098	0.5693	0.64889	0.605688	1.8599	1.97326	1.59027	0.158072	0.133077	0.212185	0.607009	1.85573	0.15626	0.00699449	0.0209976	0.00355447	0.0142658	-1.24872	-1.69947	0.420821	0.307899
b2187	yejL	chr	+	2282150	2282378	-0.48447	-0.552987	-0.391389	0.742309	0.722871	0.991485	-0.309507	-0.565448	-0.243885	-0.465878	0.781951	-0.39904	0.00082717	0.00589309	0.000864597	0.00593265	-1.24783	-1.18099	0.421081	0.441048
b1626	ydgK	chr	+	1703273	1703714	-1.54655	-1.49123	-1.69719	-0.525104	-0.216771	-0.28676	-2.45471	-2.26984	-2.34979	-1.574	-0.327273	-2.36857	0.000803382	0.0058353	0.000227909	0.00297681	-1.24673	-2.0413	0.421403	0.242945
b1605	ydgI	chr	+	1677580	1678963	-2.16691	-2.33117	-2.48366	-1.01668	-0.968291	-1.59622	-2.66355	-2.38579	-3.18369	-2.35185	-1.12137	-2.63663	0.0172193	0.0392042	0.00780448	0.0231031	-1.23048	-1.51526	0.426176	0.349833
b0884	infA	chr	-	925447	925666	-1.7986	-1.65817	-1.66337	-0.50018	-0.488889	-0.500142	-1.67555	-1.62329	-1.22449	-1.70207	-0.492031	-1.57573	0.0013513	0.00770914	0.0192066	0.0419951	-1.21004	-1.0837	0.432256	0.471816
b1088	yceD	chr	+	1146016	1146538	-4.2364	-4.2587	-4.28801	-3.06619	-2.9988	-3.18679	-4.16728	-4.34076	-4.11491	-4.26283	-3.05452	-4.19748	0.00117617	0.00711915	0.000276728	0.00320008	-1.20831	-1.14296	0.432775	0.452829
b0637	ybeB	chr	-	667941	668259	-0.467528	-0.688581	-0.486393	0.718432	0.760057	0.303783	-0.406497	-0.296693	-0.901516	-0.548579	0.656367	-0.465029	0.00659285	0.0202407	0.0100815	0.0270963	-1.20495	-1.1214	0.433786	0.459649
b0630	lipB	chr	-	660859	661501	0.144003	0.356527	0.207437	1.30689	1.49287	1.66657	0.0802114	-0.137866	0.195766	0.238579	1.44287	0.0469764	0.00127654	0.00742485	0.000547908	0.0045769	-1.20429	-1.39589	0.433983	0.380009
b2669	stpA	chr	-	2796112	2796517	-0.0789726	-0.158484	-0.194194	0.874913	1.05464	1.53242	-0.378232	-0.544549	-0.358546	-0.135589	1.06457	-0.421812	0.0195861	0.0428312	0.0100374	0.0270267	-1.20016	-1.48639	0.435226	0.356905
b3084	rlmG	chr	-	3232760	3233897	-0.526552	-0.319225	-0.903951	0.348966	0.805569	0.375054	-0.707217	-0.827525	-1.14786	-0.639572	0.55168	-0.815767	0.00890603	0.0250682	0.00220006	0.0111047	-1.19125	-1.36745	0.437923	0.387577
b2942	metK	chr	+	3084727	3085882	0.981412	0.890451	0.664322	1.88031	2.04544	2.18747	0.562552	0.663682	0.396088	0.818988	2.00569	0.574024	0.000785729	0.0058009	0.000246102	0.00306532	-1.1867	-1.43166	0.439307	0.370704
b4155	poxA	chr	+	4380665	4381643	-1.85232	-1.70522	-1.3219	-0.624366	-0.249066	-0.519132	-1.80749	-1.96485	-1.85738	-1.61484	-0.438663	-1.87386	0.00539598	0.0175428	0.00229153	0.0113879	-1.17618	-1.4352	0.442522	0.369796
b1870	cmoA	chr	+	1950725	1951469	0.124983	0.526511	0.43336	1.54461	1.70336	1.13494	0.282873	0.0644947	-0.114031	0.367621	1.52738	0.165055	0.00809435	0.0232225	0.00391711	0.0153315	-1.15976	-1.36233	0.447586	0.388954
b1125	potB	chr	-	1182839	1183667	-0.904119	-0.565224	-0.735155	0.393114	0.392481	0.571399	-0.884357	-1.43215	-1.42142	-0.727642	0.431147	-1.21741	0.00124458	0.00732483	0.00650497	0.020521	-1.15879	-1.64855	0.447888	0.31896
b0841	ybjG	chr	-	882014	882611	-0.391397	-0.106868	-0.125722	1.16027	0.86781	0.778907	-0.592142	-0.828645	-0.533632	-0.194617	0.950748	-0.668798	0.00180536	0.0090511	0.000549358	0.0045769	-1.14537	-1.61955	0.452075	0.325438
b0405	queA	chr	+	424234	425305	-0.543687	-0.807764	-0.544945	0.71763	0.450948	0.270701	-0.141945	-0.221322	-0.462931	-0.646671	0.497081	-0.200291	0.0033529	0.0133132	0.0115256	0.0297429	-1.14375	-0.697371	0.452581	0.616695
b0171	pyrH	chr	+	191854	192580	0.950454	0.795669	1.09106	2.3011	1.98901	1.8923	1.06137	1.03958	0.991402	0.944005	2.08344	1.04105	0.00273939	0.0117598	0.0122434	0.0305879	-1.13943	-1.04239	0.453938	0.485524
b0423	thiI	chr	+	440772	442221	-0.349853	-0.170915	-0.352478	0.947423	0.967895	0.493009	-0.536584	-0.333261	-0.684457	-0.288603	0.850653	-0.48203	0.0111092	0.0289189	0.00351208	0.0142566	-1.13926	-1.33268	0.453994	0.397029
b1905	ftnA	chr	+	1986739	1987237	1.89749	1.62941	1.97507	2.881	2.91583	3.21109	2.39839	1.93017	2.402	1.81975	2.94945	2.19929	0.00139417	0.00775454	0.0206062	0.0435214	-1.1297	-0.750154	0.457011	0.59454
b0337	codA	chr	+	355394	356678	1.05757	1.63008	1.37857	2.70114	2.42156	2.21943	0.850163	0.633047	0.448094	1.36571	2.47749	0.717852	0.0078464	0.0228189	0.000678883	0.00506721	-1.11178	-1.75964	0.462723	0.295322
b0961	yccF	chr	-	1023124	1023571	1.12498	1.31471	0.947336	2.33102	2.30711	1.75439	0.58135	1.20162	1.09649	1.10076	2.20893	0.90474	0.0169521	0.0388334	0.0120902	0.0304225	-1.10817	-1.30419	0.463881	0.404947
b1967	hchA	chr	+	2033858	2034710	0.79816	0.768586	0.362995	1.60168	1.72042	1.90013	1.00465	0.94555	0.742243	0.606275	1.71356	0.932873	0.00494658	0.0167778	0.00206496	0.0107133	-1.10729	-0.780691	0.464165	0.582088
b2567	rnc	chr	-	2701404	2702085	0.105391	-0.0844938	0.160055	1.15814	1.18156	1.02074	0.0589386	-0.00595386	-0.349433	0.0534822	1.14781	-0.0245693	0.00058795	0.00524536	0.00498355	0.0172288	-1.09433	-1.17238	0.468353	0.443688
b0910	cmk	chr	+	960423	961107	-1.1205	-1.41342	-1.41032	-0.256093	-0.207345	-0.368044	-0.752139	-0.90942	-0.963325	-1.34625	-0.254035	-0.826031	0.00273314	0.0117598	0.00221638	0.0111493	-1.09221	-0.571996	0.469042	0.672685
b0905	ycaO	chr	-	954094	955855	0.674253	0.811278	0.811537	1.89477	1.87009	1.79361	0.600638	0.813094	0.641506	0.775069	1.86342	0.682142	0.000105471	0.00241761	0.00069347	0.00506721	-1.08835	-1.18128	0.470299	0.440961
b2780	pyrG	chr	-	2906050	2907688	0.549566	0.359898	0.448173	1.61124	1.43351	1.62063	0.0372919	-0.0782626	-0.131688	0.445491	1.53182	-0.0320618	0.000188274	0.00325977	4.48045e-05	0.00132476	-1.08633	-1.56388	0.470959	0.33824
b3067	rpoD	chr	+	3211068	3212910	0.850776	0.763603	0.776533	1.96945	1.98624	1.47631	0.309613	0.372592	0.584127	0.786498	1.87168	0.367205	0.0237238	0.0492674	0.00545877	0.0181837	-1.08518	-1.50448	0.471332	0.352458
b0661	miaB	chr	-	692753	694178	0.300475	0.356318	0.359417	1.38579	1.43534	1.45396	0.144959	0.0908223	-0.295985	0.341356	1.42534	0.0529384	2.71356e-06	0.000611074	0.00804886	0.0234507	-1.08399	-1.3724	0.471723	0.386247
b3783	rho	chr	+	3964439	3965699	0.378802	0.335466	0.490901	1.59074	1.50142	1.26943	0.871138	0.704456	0.965095	0.408087	1.48951	0.830147	0.00257906	0.0113953	0.00874586	0.0247578	-1.08142	-0.659361	0.472563	0.633159
b4111	proP	chr	+	4328524	4330027	-1.11776	-1.08577	-1.15515	-0.138939	-0.0768682	0.256124	-0.979004	-0.788441	-0.933817	-1.12328	-0.04641	-0.89111	0.0100073	0.0269455	0.00790836	0.023234	-1.07687	-0.8447	0.474055	0.556827
b3170	yhbC	chr	-	3315575	3316034	-0.190472	-0.372823	-0.383132	0.54874	0.965251	0.566765	-0.377125	-0.437196	-0.506377	-0.339778	0.725132	-0.437428	0.00815488	0.0233064	0.00988872	0.0269412	-1.06491	-1.16256	0.478003	0.446719
b2924	mscS	chr	-	3066968	3067829	-0.452922	-0.776511	-0.456161	0.543849	0.513043	0.293009	-0.925537	-0.973235	-1.27562	-0.577767	0.486885	-0.987242	0.00225195	0.0105114	0.000606832	0.00480624	-1.06465	-1.47413	0.478088	0.359951
b1203	ychF	chr	-	1255943	1257035	0.488742	0.921872	0.835419	1.61242	1.90077	2.14254	0.830869	0.677132	0.354921	0.767831	1.83182	0.684779	0.00526667	0.0172408	0.00377788	0.0149608	-1.06399	-1.14704	0.478307	0.45155
b3288	fmt	chr	+	3432235	3433183	-0.603336	-0.755195	-0.362217	0.344826	0.655607	0.441056	-0.382442	-0.357781	-0.381758	-0.567488	0.489854	-0.364506	0.00236286	0.0107593	0.0108941	0.0287611	-1.05734	-0.85436	0.480516	0.55311
b3492	yhiN	chr	-	3634230	3635433	-0.774953	-1.49568	-1.13599	0.0686021	-0.345216	0.116205	-0.93214	-1.87281	-1.74586	-1.17435	-0.119454	-1.47322	0.0164892	0.0381249	0.0221978	0.0459701	-1.0549	-1.35377	0.481331	0.391268
b3741	mnmG	chr	-	3921766	3923656	-1.35048	-1.24259	-1.27161	-0.214161	-0.169106	-0.38319	-1.14592	-0.836568	-1.38542	-1.28357	-0.228837	-1.07583	0.000865005	0.00594287	0.0199894	0.042766	-1.05473	-0.846996	0.481386	0.555941
b1658	purR	chr	+	1735867	1736893	-0.738813	-0.642442	-0.479619	0.371608	0.575547	0.241441	-0.798752	-0.514329	-0.725099	-0.611573	0.437347	-0.673374	0.00150981	0.00823242	0.00122767	0.00749179	-1.04892	-1.11072	0.48333	0.463063
b3866	yihI	chr	+	4049369	4049879	0.600907	0.040973	0.667076	1.48607	1.33967	1.76703	0.514783	0.258414	-0.213277	0.416524	1.46536	0.289646	0.0142823	0.034356	0.0100209	0.0270267	-1.04883	-1.17571	0.483359	0.442665
b1767	ansA	chr	+	1848883	1849900	0.484375	0.866028	0.640922	1.45319	1.87411	1.90805	0.976707	0.734899	0.733608	0.671811	1.71265	0.83042	0.00516739	0.0171507	0.0103381	0.0276861	-1.04083	-0.882226	0.486046	0.54253
b1876	argS	chr	+	1958085	1959819	0.219936	0.250131	0.241187	1.35462	1.3143	1.03196	0.302223	0.224104	0.421317	0.230313	1.2689	0.302649	0.00978228	0.0264833	0.0035426	0.0142566	-1.03858	-0.966249	0.486805	0.511835
b2185	rplY	chr	+	2280538	2280823	0.255483	0.111088	0.251597	1.18383	1.2089	1.29641	0.206846	0.2174	0.114616	0.20294	1.21598	0.192314	0.000122525	0.00256958	2.46054e-05	0.000962096	-1.01304	-1.02367	0.495501	0.491865
b2576	srmB	chr	+	2710917	2712252	0.160553	-0.020466	0.187727	1.19999	1.05687	1.07429	-0.139031	-0.0383299	0.125744	0.108042	1.11713	-0.0859991	0.000446728	0.00475127	0.000747895	0.00534449	-1.00909	-1.20313	0.496861	0.434333
b2828	lgt	chr	-	2963183	2964059	0.0463466	-0.396206	-0.0317573	0.854744	0.918208	0.75192	0.309071	-0.0221444	0.327856	-0.148129	0.859497	0.22191	0.0118112	0.030063	0.0182171	0.040425	-1.00763	-0.637587	0.497364	0.642787
b2183	rsuA	chr	-	2277809	2278505	-0.561154	-0.453485	-0.495144	0.366677	0.579645	0.668796	-0.334024	-0.246345	-0.212802	-0.489413	0.515292	-0.301358	0.00364149	0.0140052	0.00584481	0.0191164	-1.00471	-0.816651	0.498372	0.567759
b0469	apt	chr	+	490635	491187	0.520823	0.472321	0.849281	1.76619	1.57825	1.46279	-0.420813	-0.435516	-0.74256	0.624482	1.62588	-0.474885	0.0034127	0.0135146	0.000119943	0.00205281	-1.0014	-2.10077	0.499514	0.233134
b2890	lysS	chr	-	3031678	3033196	0.662949	0.443289	0.731622	1.72154	1.45089	1.77377	0.38663	0.569621	0.886491	0.612309	1.60817	0.522869	0.00156525	0.00832378	0.0062045	0.0199536	-0.995862	-1.0853	0.501436	0.471293
b1807	yeaZ	chr	-	1888595	1889291	-0.866878	-0.84419	-1.02026	0.270246	-0.0841043	0.0722053	-1.30033	-1.15782	-1.21668	-0.917185	0.0775939	-1.21427	0.00306123	0.0125872	0.00233361	0.0114148	-0.994779	-1.29187	0.501813	0.408422
b2113	mrp	chr	-	2191080	2192190	0.30866	0.126341	0.378799	1.34402	1.21003	1.21617	0.375579	0.412508	0.311197	0.271606	1.26202	0.390733	0.00107215	0.0066242	0.000171725	0.00250309	-0.990415	-0.871288	0.503333	0.546658
b1714	pheS	chr	-	1795982	1796966	0.323802	0.199131	0.051307	1.18605	1.15615	1.07832	0.278845	0.350447	0.422199	0.171861	1.1592	0.331916	0.00267757	0.0117262	0.000166035	0.00249723	-0.987343	-0.827287	0.504406	0.563588
b4375	prfC	chr	+	4607436	4609026	0.520142	0.568918	0.491821	1.50466	1.50563	1.53417	0.555222	0.479759	0.36936	0.526021	1.51268	0.497073	7.50652e-05	0.00196091	0.00203851	0.0106499	-0.986659	-1.01561	0.504645	0.49462
b0529	folD	chr	-	556097	556964	0.896668	1.13833	0.59667	1.68783	1.90363	1.8581	0.656211	0.464002	0.298265	0.832114	1.8122	0.515316	0.015567	0.0366181	0.000918194	0.00610353	-0.980089	-1.29689	0.506949	0.407004
b0955	ycbZ	chr	-	1015761	1017522	-1.10652	-1.03009	-1.1963	0.0439583	-0.106417	-0.433475	-0.977995	-1.32463	-1.20231	-1.11398	-0.133914	-1.11041	0.0139757	0.0336728	0.00596143	0.0193389	-0.980063	-0.976492	0.506958	0.508214
b3390	aroK	chr	-	3516564	3517086	-0.386087	-0.34698	-0.51271	0.721173	0.405565	0.534522	-0.743939	-0.481609	-0.176882	-0.436609	0.53286	-0.554606	0.00232937	0.010705	0.0108279	0.0286373	-0.969469	-1.08747	0.510694	0.470587
b2937	speB	chr	-	3080898	3081819	1.61148	1.1507	1.55481	2.36812	2.41209	2.34089	1.0519	1.12741	1.11201	1.41433	2.38347	1.07905	0.0214507	0.0460231	2.32913e-06	0.000299317	-0.969141	-1.30442	0.51081	0.404883
b3643	rph	chr	-	3813885	3814572	-0.339206	-0.355114	-0.353542	0.501319	0.724882	0.516531	-0.528932	-0.810378	-0.955505	-0.363465	0.603951	-0.712981	0.00576571	0.0184627	0.00201981	0.0105898	-0.967417	-1.31693	0.511421	0.401387
b0154	hemL	chr	-	173601	174882	0.732728	0.525842	0.935843	1.68659	1.67605	1.77205	0.747642	0.681768	0.450001	0.73234	1.69624	0.680556	0.0104771	0.028008	0.00351476	0.0142566	-0.963905	-1.01569	0.512668	0.494592
b3363	ppiA	chr	-	3489746	3490319	0.238898	0.565251	0.545266	1.4846	1.4896	1.19119	0.6164	0.557904	0.615991	0.469264	1.42851	0.6064	0.00294481	0.0122481	0.0126519	0.0312487	-0.959242	-0.822106	0.514327	0.565616
b1133	mnmA	chr	-	1191889	1192996	-0.536639	-0.248026	-0.0750921	0.588483	0.695111	0.851472	-0.438695	-0.475394	-0.500367	-0.267111	0.687614	-0.45142	0.00640147	0.0198377	0.00279527	0.012355	-0.954726	-1.13903	0.51594	0.454063
b0058	rluA	chr	-	59686	60346	-2.61328	-2.1477	-2.42749	-1.68738	-1.30402	-1.20002	-2.79875	-2.90869	-2.58161	-2.38102	-1.43998	-2.77519	0.00777013	0.0226857	0.00275663	0.012296	-0.941044	-1.33521	0.520856	0.396334
b1097	yceG	chr	+	1153334	1154357	-1.18893	-1.64555	-1.34173	-0.725343	-0.185919	-0.609802	-1.41346	-1.86722	-1.89091	-1.41532	-0.476342	-1.62811	0.0151131	0.0358906	0.00578938	0.0190717	-0.93898	-1.15177	0.521602	0.450074
b2413	cysZ	chr	+	2529484	2530246	0.126569	-0.44647	-0.263784	0.543304	0.803702	0.925982	-0.982862	-1.08015	-0.654462	-0.222534	0.716152	-1.013	0.0130298	0.0322326	0.000683225	0.00506721	-0.938686	-1.72915	0.521708	0.301629
b2040	rfbD	chr	-	2109100	2110000	1.228	1.08119	1.37939	2.34475	2.08088	2.0321	1.13203	1.30063	1.51942	1.22721	2.15742	1.24013	0.00217885	0.0102393	0.00519971	0.017705	-0.930207	-0.917285	0.524783	0.529505
b1241	adhE	chr	-	1294668	1297344	1.32472	1.32629	1.51514	2.40109	2.31994	2.2174	1.97324	2.01287	1.89405	1.39888	2.32295	1.97508	0.000424837	0.0045952	0.00785948	0.0231738	-0.924066	-0.347873	0.527022	0.785741
b0918	kdsB	chr	+	970074	970821	0.0762052	-0.393808	-0.329242	0.875728	0.469489	0.74673	-0.798752	-0.801816	-0.204235	-0.262701	0.660345	-0.736468	0.00947239	0.0259749	0.00879659	0.024807	-0.923045	-1.39681	0.527395	0.379767
b1786	yeaJ	chr	+	1870064	1871555	-1.89856	-2.17917	-1.96077	-0.988623	-1.18896	-1.14454	-2.31874	-2.47129	-2.40435	-2.03729	-1.1197	-2.4187	0.00151534	0.00823242	0.000125719	0.00210332	-0.917587	-1.29899	0.529394	0.40641
b0960	yccS	chr	-	1020952	1023106	-2.35715	-2.17909	-2.22743	-1.2898	-1.34948	-1.3274	-2.53299	-2.312	-2.78347	-2.24106	-1.32475	-2.49877	0.00146594	0.00805457	0.011226	0.029274	-0.916313	-1.17402	0.529861	0.443183
b1718	infC	chr	-	1798119	1798662	-3.32277	-3.35925	-3.26509	-2.42728	-2.3932	-2.3952	-3.04727	-3.15302	-3.13381	-3.30866	-2.39972	-3.09961	0.000192543	0.00326089	0.00082551	0.0057101	-0.908946	-0.699893	0.532574	0.615618
b1277	ribA	chr	-	1336593	1337184	-0.170969	-0.271319	-0.0832666	0.622195	0.727117	0.910665	-0.196591	-0.353944	0.172102	-0.172024	0.715075	-0.241597	0.00154604	0.00828076	0.014787	0.0350784	-0.8871	-0.956672	0.5407	0.515244
b1286	rnb	chr	-	1345001	1346936	0.466651	0.50032	0.628718	1.28412	1.41254	1.74863	0.414985	0.493634	0.357945	0.53701	1.42398	0.43742	0.0128087	0.0320003	0.011745	0.0301004	-0.886975	-0.986564	0.540747	0.504678
b3321	rpsJ	chr	-	3450980	3451292	0.614271	0.570465	0.616799	1.46269	1.49275	1.52163	0.750494	0.742173	0.542016	0.598254	1.48451	0.713236	2.93101e-06	0.000611074	0.00474093	0.0169609	-0.886261	-0.771279	0.541015	0.585898
b1749	xthA	chr	+	1830451	1831258	0.781487	0.713665	0.841361	1.72235	1.58973	1.71779	1.074	0.757957	0.861468	0.773155	1.65826	0.929885	0.000113137	0.00251435	0.00578287	0.0190717	-0.885104	-0.728374	0.541448	0.603584
b1631	rsxG	chr	+	1708227	1708848	-1.0846	-0.709821	-0.798969	-0.256634	0.21671	0.24879	-0.941291	-1.15935	-1.79137	-0.852892	0.0320641	-1.19865	0.0123079	0.0310094	0.0154027	0.0358914	-0.884956	-1.23071	0.541504	0.426107
b3165	rpsO	chr	-	3309436	3309706	-0.744389	-0.738124	-0.732544	0.187259	0.135513	0.0870312	-0.812257	-0.863309	-0.921314	-0.736826	0.14487	-0.849511	0.00095001	0.00609726	2.08744e-05	0.000863387	-0.881696	-0.994381	0.542729	0.501951
b2042	galF	chr	-	2111457	2112351	-1.0301	-1.07744	-1.13935	-0.322613	-0.155531	-0.155109	-0.70373	-0.702776	-0.775437	-1.08665	-0.214628	-0.723095	0.000649993	0.00531671	0.00491381	0.0170552	-0.872021	-0.508467	0.546381	0.702969
b0125	hpt	chr	+	141430	141967	0.316816	0.40572	0.587118	1.27471	1.30372	1.41349	0.580638	0.604243	0.506073	0.448384	1.31365	0.5823	0.00203831	0.009759	0.000239525	0.00304832	-0.865269	-0.731353	0.548944	0.602339
b0632	dacA	chr	-	661974	663186	0.664451	0.571007	0.630142	1.64819	1.27016	1.71157	0.801294	0.438992	0.588935	0.620598	1.47919	0.637668	0.0184912	0.0410333	0.00694643	0.0210657	-0.858596	-0.841526	0.551489	0.558053
b2610	ffh	chr	-	2744455	2745817	-0.207037	-0.349861	-0.286027	0.587705	0.520557	0.629848	-0.305598	-0.498071	-0.837438	-0.289176	0.565576	-0.462671	0.000121209	0.00256958	0.0154743	0.0359458	-0.854752	-1.02825	0.55296	0.490306
b0182	lpxB	chr	+	203347	204496	-2.89508	-2.786	-2.88412	-2.12899	-1.92164	-1.77765	-2.95977	-3.04803	-2.71317	-2.832	-1.97815	-2.96407	0.00707457	0.0211527	0.0025217	0.0118076	-0.853846	-0.985912	0.553308	0.504907
b3742	mioC	chr	-	3924034	3924478	-1.34405	-1.46834	-1.08551	-0.407815	-0.536948	-0.274695	-0.804222	-1.06184	-1.11769	-1.30239	-0.448831	-0.944514	0.00437545	0.0155862	0.00995858	0.0269412	-0.853558	-0.495684	0.553418	0.709226
b0954	fabA	chr	-	1015174	1015693	-0.192344	-0.168468	-0.19896	0.633351	0.646717	0.755574	-0.328253	-0.26652	-0.557936	-0.18862	0.662354	-0.349315	0.00122156	0.0072238	0.00242348	0.0116405	-0.850975	-1.01167	0.55441	0.495972
b0170	tsf	chr	+	190856	191708	0.474715	0.500424	0.494942	1.29677	1.36924	1.35247	0.433555	0.399534	0.562227	0.492206	1.34076	0.440966	0.000177468	0.00313669	0.000828329	0.0057101	-0.848553	-0.899794	0.555341	0.535963
b1864	yebC	chr	-	1945434	1946175	0.975282	0.903574	0.791642	1.81015	1.67381	1.65184	0.964942	1.10185	0.780598	0.873307	1.721	0.986078	0.000363175	0.00423267	0.00516101	0.0176661	-0.847689	-0.734919	0.555674	0.600852
b4595	yciY	chr	+	1306811	1306985	-5.11599	-5.20425	-4.98191	-4.24437	-4.28419	-4.52647	-4.88133	-5.04956	-4.84747	-5.11614	-4.29092	-4.94213	0.00323703	0.0130622	0.00802327	0.0234507	-0.825216	-0.651207	0.564398	0.636747
b0180	fabZ	chr	+	202100	202556	0.969441	0.906654	0.857264	1.66489	1.77544	1.7434	0.552293	0.332397	0.381166	0.899955	1.72431	0.447801	6.0058e-05	0.00195517	0.000473807	0.00435493	-0.824353	-1.27651	0.564736	0.412794
b2566	era	chr	-	2700502	2701408	-0.159462	0.370392	-0.12941	0.808626	0.777871	1.12225	-0.363657	-0.823825	-0.0928615	0.0287494	0.851306	-0.52204	0.017936	0.0403034	0.0116656	0.0300001	-0.822556	-1.37335	0.565439	0.385995
b1132	hflD	chr	-	1191212	1191854	-0.32837	-0.514057	-0.818851	0.470552	0.0985676	0.0238594	-0.898578	-0.901893	-1.13983	-0.61716	0.203368	-0.954433	0.0194838	0.0427266	0.00410036	0.0157763	-0.820529	-1.1578	0.566234	0.448195
b3187	ispB	chr	+	3331731	3332703	-1.06912	-0.978142	-1.29659	-0.347645	-0.319047	-0.315045	-1.0947	-1.07414	-0.867321	-1.13886	-0.323766	-1.03933	0.0133632	0.0326801	0.00993068	0.0269412	-0.815097	-0.715568	0.56837	0.608965
b3620	rfaF	chr	+	3792951	3793998	-1.2028	-1.59307	-1.48723	-0.817509	-0.521844	-0.630221	-1.39532	-1.1749	-1.67256	-1.46969	-0.657387	-1.38293	0.00753801	0.0222259	0.0168183	0.0381164	-0.812307	-0.725542	0.569471	0.60477
b2812	ygdL	chr	-	2943057	2943864	-1.58654	-1.13539	-1.57142	-0.675713	-0.554203	-0.738598	-1.90849	-1.90851	-2.10776	-1.43408	-0.628233	-1.93195	0.0237993	0.0492867	0.000135218	0.00219024	-0.805851	-1.30372	0.572024	0.40508
b0957	ompA	chr	-	1018235	1019276	1.01726	1.00139	0.996599	1.79434	1.7948	1.87583	1.27507	1.26709	1.19997	1.00253	1.8068	1.2597	0.00065343	0.00531671	0.000101501	0.00185266	-0.804266	-0.547098	0.572653	0.684395
b4202	rpsR	chr	+	4423861	4424089	1.59096	1.55129	1.60178	2.31305	2.38125	2.51877	2.10747	2.03525	1.91138	1.58342	2.38131	2.05056	0.00350724	0.0137604	0.00982148	0.0268334	-0.797889	-0.330755	0.57519	0.79512
b0194	proS	chr	-	217056	218775	-0.153658	-0.194498	-0.16731	0.509185	0.760548	0.536438	-0.498422	-0.289529	-0.50598	-0.170623	0.624507	-0.428947	0.00920488	0.0256668	0.000677005	0.00506721	-0.795131	-1.05345	0.576291	0.481813
b0951	pqiB	chr	+	1012481	1014122	-0.708444	-0.706323	-1.0241	0.0384496	0.0398146	-0.338762	-1.30863	-1.18623	-0.98085	-0.829856	-0.0359554	-1.19307	0.0123329	0.0310197	0.00317205	0.0132674	-0.793901	-1.15712	0.576783	0.448407
b1667	ydhR	chr	+	1744723	1745029	-0.278745	-0.206497	-0.581421	0.169959	0.506162	0.71324	-0.468219	-0.0872395	-0.539641	-0.384609	0.402103	-0.352262	0.0167635	0.0386392	0.0178142	0.0396493	-0.786712	-0.754365	0.579664	0.592807
b1831	proQ	chr	-	1912859	1913558	-0.663697	-0.469118	-0.467641	0.361492	0.154277	0.31576	-0.313453	-0.35042	-0.394434	-0.525083	0.261271	-0.339215	0.00086402	0.00594287	0.00485365	0.017046	-0.786355	-0.600486	0.579807	0.659532
b0914	msbA	chr	+	965843	967592	-1.32356	-1.02096	-1.29761	-0.36883	-0.436175	-0.618524	-1.58099	-1.38247	-1.17694	-1.22631	-0.443745	-1.45645	0.0046049	0.0160955	0.00488015	0.017046	-0.782568	-1.01271	0.581331	0.495616
b3341	rpsG	chr	-	3471563	3472103	1.67945	1.58429	1.54942	2.29076	2.44111	2.43377	1.58385	1.53543	1.54514	1.59699	2.37669	1.55786	0.000310046	0.00401442	0.00175323	0.0097047	-0.779696	-0.818831	0.58249	0.566901
b3303	rpsE	chr	-	3442747	3443251	0.420397	0.485321	0.496829	1.24789	1.22259	1.33005	0.531943	0.535973	0.524654	0.471058	1.25045	0.53043	7.19214e-05	0.00196091	0.00176597	0.00973902	-0.779393	-0.720021	0.582612	0.607089
b3651	trmH	chr	+	3822537	3823227	-1.85104	-1.87681	-1.59646	-0.909768	-0.990426	-1.10336	-1.90229	-2.12996	-2.35305	-1.76429	-0.985377	-2.04792	0.00352973	0.0137947	0.00585432	0.0191164	-0.778914	-1.06254	0.582805	0.478788
b0472	recR	chr	+	493628	494234	-2.66262	-2.5824	-2.85132	-1.92158	-1.79684	-2.19229	-2.94879	-2.65127	-3.17253	-2.69511	-1.91775	-2.89471	0.00935755	0.0258289	0.00879107	0.024807	-0.777364	-0.97696	0.583432	0.508049
b0820	ybiT	chr	+	855185	856778	-0.417715	-0.208247	0.121481	0.763705	0.6056	0.409563	-0.239636	-0.356322	-0.713735	-0.150781	0.620166	-0.364624	0.0206535	0.0446992	0.00569174	0.0188447	-0.770947	-0.98479	0.586033	0.505299
b2296	ackA	chr	+	2411491	2412694	1.47307	1.36894	1.52986	2.14809	2.35743	2.09547	0.315314	0.311539	0.0856836	1.45583	2.22667	0.270663	0.00306861	0.0125872	5.97536e-05	0.00151087	-0.770837	-1.956	0.586077	0.257741
b3228	sspB	chr	-	3374300	3374798	-2.09324	-2.18826	-1.85739	-1.2911	-1.13159	-1.59188	-2.34105	-2.43223	-2.56189	-2.04452	-1.28165	-2.43338	0.016018	0.0373092	0.00598843	0.0193843	-0.762876	-1.15174	0.589321	0.450083
b1825	yebO	chr	-	1906284	1906572	-4.46779	-4.48992	-4.35533	-3.69549	-3.67485	-3.69824	-4.94865	-4.78882	-4.67468	-4.43565	-3.67772	-4.92681	0.00241448	0.0108944	0.00474997	0.0169609	-0.757935	-1.2491	0.591342	0.420711
b2350	yfdG	chr	+	2465876	2466239	-2.83005	-3.02291	-2.78936	-2.18915	-2.16041	-2.05209	-3.27781	-2.87122	-3.119	-2.90467	-2.14729	-3.1132	0.00223568	0.0104683	0.00873426	0.0247578	-0.75738	-0.965907	0.59157	0.511956
b1090	plsX	chr	+	1146843	1147914	-4.24443	-4.05899	-4.24016	-3.41467	-3.35105	-3.77047	-4.97289	-4.58667	-4.94877	-4.18911	-3.43744	-4.81846	0.0212754	0.0457129	0.00185799	0.0100969	-0.751664	-1.38102	0.593918	0.383949
b3315	rplV	chr	-	3447922	3448255	0.690974	0.804193	0.81398	1.4831	1.5071	1.65062	0.658285	0.693928	1.07048	0.778837	1.52663	0.73429	0.000432177	0.00462958	0.019175	0.0419875	-0.747789	-0.792336	0.595516	0.577408
b3938	metJ	chr	-	4126100	4126418	-1.16311	-1.09327	-0.964836	-0.365137	-0.354542	-0.201871	-1.29419	-1.23807	-1.36561	-1.0697	-0.330223	-1.24897	0.000642669	0.00531671	0.000211199	0.00283311	-0.739479	-0.918751	0.598956	0.528967
b2264	menD	chr	-	2375610	2377281	-1.25306	-1.22951	-1.22083	-0.484284	-0.623761	-0.250781	-2.53614	-2.07786	-2.83332	-1.2445	-0.505352	-2.43774	0.0181994	0.0405298	0.00405539	0.0156437	-0.739152	-1.93238	0.599091	0.261996
b0114	aceE	chr	+	123016	125680	1.59446	1.7287	1.70246	2.46123	2.39861	2.38529	0.395107	0.300404	0.212615	1.68222	2.41827	0.329141	0.000411333	0.00456942	8.59215e-05	0.00172888	-0.736048	-2.08913	0.600382	0.235023
b2608	rimM	chr	-	2743391	2743940	-4.10353	-3.92983	-3.93454	-3.32988	-3.28371	-3.13658	-4.60063	-4.47323	-4.25501	-3.99102	-3.27524	-4.48969	0.000824763	0.00589309	0.00149425	0.00859048	-0.715781	-1.21446	0.608875	0.430935
b1048	mdoG	chr	+	1108557	1110093	0.96307	1.14686	1.21492	1.55625	2.03086	2.01033	1.20981	0.974796	1.0634	1.12002	1.83481	1.10204	0.0234613	0.0488585	0.0229265	0.046828	-0.714798	-0.732774	0.60929	0.601746
b1866	aspS	chr	-	1946773	1948546	1.29605	1.22655	1.25791	1.96076	1.94141	2.00742	0.951331	1.04756	0.712817	1.25475	1.96642	0.941925	1.46013e-05	0.000905892	0.00687342	0.0210005	-0.711661	-1.02449	0.610617	0.491584
b2277	nuoM	chr	-	2389533	2391063	0.470282	0.373084	0.428411	1.06073	1.18572	1.09545	0.829255	0.923662	0.870971	0.416686	1.12567	0.870463	0.000192719	0.00326089	0.00833087	0.0238093	-0.708989	-0.255212	0.611749	0.837864
b0433	ampG	chr	-	451293	452769	-2.54751	-2.72071	-2.43578	-2.14746	-1.68036	-1.78335	-2.38479	-2.87122	-2.60144	-2.57803	-1.87408	-2.6144	0.0206294	0.0446992	0.0199525	0.042766	-0.703945	-0.740324	0.613891	0.598605
b2400	gltX	chr	-	2517278	2518694	0.62982	0.580511	0.578381	1.27383	1.33483	1.22438	0.451125	0.477494	0.222204	0.593497	1.29388	0.42223	0.000306401	0.00401442	0.00353803	0.0142566	-0.700379	-0.871646	0.615411	0.546523
b3649	rpoZ	chr	+	3820128	3820404	0.00575163	-0.125101	-0.240626	0.450797	0.682229	0.477303	-0.805542	-0.496462	-0.763892	-0.133431	0.553768	-0.701793	0.00300522	0.0124299	0.000773575	0.00546665	-0.687199	-1.25556	0.621059	0.418831
b3231	rplM	chr	-	3376244	3376673	0.804844	0.767734	0.84326	1.51787	1.44168	1.58959	0.187613	0.0963804	0.272366	0.808587	1.49322	0.166272	0.00069418	0.00546564	4.56042e-05	0.00132476	-0.68463	-1.32694	0.622165	0.398611
b3733	atpG	chr	-	3915424	3916288	-0.680771	-0.569576	-0.684328	0.0307068	0.0445388	0.06325	-0.177723	-0.177223	-0.296717	-0.639571	0.0443757	-0.188105	0.00181823	0.00908504	0.0176773	0.0394625	-0.683947	-0.232481	0.62246	0.85117
b2528	iscA	chr	-	2657584	2657908	0.423449	0.270972	0.551679	1.30293	1.00142	0.931619	0.0605178	0.214857	0.102139	0.420634	1.09958	0.099903	0.0115404	0.0296783	0.00693564	0.0210657	-0.678945	-0.999676	0.624622	0.500112
b0023	rpsT	chr	-	20814	21078	-1.69745	-1.67635	-1.73449	-1.08499	-1.07158	-0.752693	-2.045	-2.20178	-2.04729	-1.70152	-1.02394	-2.11208	0.0192227	0.0423411	0.00308215	0.0130379	-0.677579	-1.08814	0.625213	0.470366
b0627	tatE	chr	+	658169	658373	-1.35625	-1.6619	-1.43783	-0.926256	-0.693855	-0.85975	-1.25651	-1.10676	-1.24085	-1.4863	-0.808969	-1.219	0.0056301	0.0181274	0.0145375	0.0346342	-0.67733	-0.410026	0.625322	0.75261
b2235	nrdB	chr	+	2345405	2346536	0.289847	0.481013	0.366386	1.03849	1.03946	1.17146	0.450145	0.397172	0.290688	0.386444	1.06106	0.402369	0.000739491	0.00564668	0.000406044	0.00390065	-0.674615	-0.658691	0.626499	0.633453
b3066	dnaG	chr	+	3209128	3210874	-2.47663	-2.6165	-2.30664	-1.73771	-1.84378	-1.80133	-3.32425	-3.1453	-3.34103	-2.46905	-1.7961	-3.26765	0.0106481	0.028414	0.000278051	0.00320008	-0.672946	-1.47155	0.627225	0.360595
b0576	pheP	chr	+	601181	602558	-1.38187	-1.53571	-1.21078	-0.931427	-0.451594	-0.73506	-1.66	-1.61198	-1.43292	-1.37296	-0.701324	-1.6051	0.0210106	0.0452093	0.0123184	0.0306619	-0.671632	-0.903775	0.627796	0.534486
b0915	lpxK	chr	+	967588	968575	-2.70487	-2.5817	-2.38542	-1.94319	-1.74048	-2.05699	-3.42923	-3.22352	-3.33981	-2.55551	-1.88459	-3.29554	0.00801085	0.0230273	0.000516733	0.0045769	-0.670916	-1.41095	0.628108	0.376065
b3296	rpsD	chr	-	3439076	3439697	0.331114	0.425491	0.480882	1.07253	1.0813	1.11378	0.32271	0.321529	0.244547	0.417197	1.08522	0.307231	0.00232875	0.010705	0.000135746	0.00219024	-0.668025	-0.777991	0.629368	0.583178
b3319	rplD	chr	-	3449702	3450308	1.03484	0.992581	1.03249	1.67221	1.71068	1.62957	1.0706	1.12466	0.985568	1.02053	1.68645	1.07788	9.54892e-05	0.00229328	0.000692402	0.00506721	-0.665924	-0.608567	0.630285	0.655848
b0642	leuS	chr	-	671423	674006	1.27788	1.31116	1.37569	1.97067	1.99837	1.9729	1.24405	1.34187	1.17159	1.32556	1.98745	1.26544	0.000839701	0.00589771	0.00362675	0.0145168	-0.66189	-0.72201	0.63205	0.606252
b2114	metG	chr	+	2192321	2194355	1.1071	1.33419	0.869097	1.89171	1.67046	1.66034	0.925158	1.19507	0.960086	1.08427	1.74616	1.02622	0.0233067	0.0486728	0.00340811	0.0139798	-0.661888	-0.719942	0.63205	0.607122
b3650	spoT	chr	+	3820422	3822531	-2.8937	-3.1747	-3.11514	-2.36594	-2.48465	-2.35062	-3.19219	-3.76681	-3.71809	-3.07678	-2.42019	-3.49984	0.00668616	0.0203177	0.019927	0.042766	-0.656587	-1.07964	0.634377	0.473146
b3057	bacA	chr	-	3201331	3202153	-0.315617	-0.0191108	-0.0243387	0.684413	0.330282	0.859998	-0.116235	-0.52132	-0.283804	-0.110209	0.545659	-0.282851	0.021787	0.0464617	0.0105186	0.0280181	-0.655868	-0.82851	0.634693	0.563111
b1094	acpP	chr	+	1150837	1151074	-1.2254	-1.31221	-1.23872	-0.571363	-0.613116	-0.632296	-0.928751	-0.94356	-0.806333	-1.25443	-0.599317	-0.916068	9.91125e-05	0.00234252	0.0123348	0.0306619	-0.655113	-0.316751	0.635026	0.802876
b3307	rpsN	chr	-	3444600	3444906	1.31306	1.35062	1.19044	2.03658	1.85597	1.95065	1.08969	1.19256	0.948014	1.28441	1.93711	1.10348	0.000757463	0.00572519	0.000883882	0.00598228	-0.652708	-0.833639	0.636085	0.561112
b3229	sspA	chr	-	3374803	3375442	0.168545	0.421999	0.0030089	0.960104	0.825191	0.651968	0.264951	0.0150636	-0.0253084	0.188043	0.84035	0.128775	0.0181294	0.0404718	0.00463545	0.0167953	-0.652307	-0.711575	0.636262	0.610653
b2779	eno	chr	-	2904664	2905963	2.10773	1.9917	2.00405	2.69209	2.67743	2.66762	1.62156	1.51407	1.70326	2.02895	2.67909	1.59037	0.00243133	0.0109281	0.00229072	0.0113879	-0.650144	-1.08872	0.637217	0.470177
b3317	rplB	chr	-	3448564	3449386	0.66887	0.707871	0.722099	1.37765	1.32424	1.32282	0.575279	0.52618	0.423171	0.699313	1.34169	0.533753	1.34422e-05	0.000870237	0.000882232	0.00598228	-0.642375	-0.807935	0.640657	0.571199
b3183	obgE	chr	-	3328603	3329776	-0.443058	-0.264308	-0.0929078	0.397008	0.359364	0.441714	-0.617723	-0.771572	-0.761133	-0.248696	0.392368	-0.70245	0.0179439	0.0403034	0.000342783	0.00351916	-0.641064	-1.09482	0.64124	0.468195
b2606	rplS	chr	-	2742204	2742552	0.639559	0.697042	0.639609	1.26781	1.34424	1.23119	0.594552	0.583203	0.742243	0.657002	1.29665	0.610262	0.000357101	0.00423267	0.000996046	0.00643071	-0.639646	-0.686386	0.64187	0.621409
b3304	rplR	chr	-	3443265	3443619	0.3937	0.404023	0.425287	1.07595	1.06865	0.9242	0.79	0.728804	0.79492	0.407488	1.04695	0.774388	0.00509654	0.0170918	0.0229251	0.046828	-0.639462	-0.272562	0.641952	0.827848
b2498	upp	chr	-	2618267	2618894	1.40098	1.33379	1.33243	2.08363	1.89929	2.02575	0.455339	0.644528	0.0738103	1.34987	1.98881	0.449069	0.00268593	0.0117283	0.00626256	0.0200126	-0.638933	-1.53974	0.642188	0.343948
b1288	fabI	chr	-	1348274	1349063	1.06034	0.998605	0.937271	1.71209	1.59774	1.51456	0.85956	0.83894	0.826491	0.987156	1.62221	0.843136	0.00183708	0.00914851	0.00457737	0.0167246	-0.635051	-0.779072	0.643918	0.582742
b0211	mltD	chr	-	232596	233955	-2.56499	-2.57632	-2.60303	-2.01264	-1.93279	-1.92485	-3.31768	-3.23204	-3.34742	-2.5848	-1.95996	-3.28071	0.000550535	0.00524078	1.0589e-05	0.000606426	-0.624838	-1.32075	0.648493	0.400327
b2522	sseB	chr	-	2652178	2652955	0.599024	0.286265	0.360605	0.777018	1.21819	1.05593	0.126937	0.578342	0.239992	0.400401	1.02213	0.296362	0.0229708	0.0482418	0.0199935	0.042766	-0.621729	-0.725768	0.649892	0.604675
b1637	tyrS	chr	-	1713971	1715246	0.22918	0.114719	0.200215	0.694922	0.908352	0.739328	0.448253	0.39985	0.582967	0.172817	0.78845	0.444448	0.00369292	0.0140052	0.0244318	0.0491954	-0.615633	-0.344002	0.652643	0.787853
b1086	rluC	chr	+	1144162	1145122	-1.19287	-1.06336	-1.1192	-0.394944	-0.535456	-0.641063	-1.37533	-1.34858	-1.24896	-1.12514	-0.509558	-1.37329	0.00481839	0.0165455	0.00198936	0.0105041	-0.615582	-0.863732	0.652666	0.549529
b3342	rpsL	chr	-	3472199	3472574	1.03438	0.974102	0.985077	1.56463	1.63409	1.58089	0.966727	0.921574	0.949985	0.99168	1.60176	0.946861	3.25139e-05	0.00144605	5.25538e-05	0.00142278	-0.610081	-0.6549	0.65516	0.635119
b3984	rplA	chr	+	4176901	4177606	0.146665	0.121233	0.0686737	0.715228	0.722806	0.708156	-0.384794	-0.39288	-0.376277	0.10792	0.714356	-0.391466	0.0010539	0.00658944	8.77033e-09	1.24304e-05	-0.606436	-1.10582	0.656817	0.464638
b0923	mukE	chr	+	974871	975549	-0.12899	0.0284176	-0.083394	0.511696	0.627127	0.475682	-0.056194	0.102085	-0.0708546	-0.050805	0.552283	-0.00398236	0.000786959	0.0058009	0.00183984	0.0100718	-0.603088	-0.556265	0.658343	0.68006
b0436	tig	chr	+	454356	455655	0.506639	0.455472	0.492436	1.09872	1.10949	0.996855	0.556448	0.572618	0.588724	0.484571	1.08715	0.570252	0.0011252	0.00689473	0.00332282	0.0137055	-0.602584	-0.516902	0.658574	0.698871
b3255	accB	chr	+	3403457	3403928	1.34694	1.32139	1.37484	1.87774	2.01316	1.93148	0.893868	0.782983	0.807396	1.34711	1.94399	0.848724	0.00160234	0.00846056	3.35472e-05	0.00113527	-0.596876	-1.09526	0.661184	0.468051
b1713	pheT	chr	-	1793580	1795968	0.496547	0.568532	0.615977	1.10147	1.20897	1.11996	0.734214	0.826495	0.683308	0.561661	1.15678	0.760589	0.000267151	0.00371764	0.00217085	0.0110784	-0.595116	-0.396188	0.661991	0.759864
b0930	asnS	chr	-	986807	988208	0.431221	0.447006	0.469276	1.10518	1.00223	1.02638	0.519638	0.517752	0.572651	0.453074	1.04718	0.537334	0.00103899	0.00652765	0.000536869	0.0045769	-0.594108	-0.509848	0.662454	0.702296
b4200	rpsF	chr	+	4423140	4423536	1.38314	1.43883	1.46853	2.08325	1.93767	2.12315	1.36188	1.34879	1.23502	1.43717	2.02456	1.33475	0.00299841	0.0124299	0.000750166	0.00534449	-0.587391	-0.689814	0.665545	0.619934
b1089	rpmF	chr	+	1146589	1146763	-0.266842	-0.0741314	-0.191231	0.374763	0.47856	0.336591	-0.263715	-0.315404	-0.46611	-0.175301	0.410912	-0.308868	0.00165145	0.00856797	0.000948123	0.00621919	-0.586213	-0.71978	0.666089	0.60719
b3041	ribB	chr	-	3181834	3182488	0.647318	1.07139	0.818817	1.21759	1.57665	1.60599	0.642853	0.516303	0.378127	0.853067	1.4356	0.552125	0.0240155	0.0495966	0.00536328	0.0179863	-0.582534	-0.883476	0.66779	0.54206
b3295	rpoA	chr	-	3438061	3439051	-1.26427	-1.23537	-1.23528	-0.680858	-0.666334	-0.653689	-1.43247	-1.4439	-1.46655	-1.24626	-0.6672	-1.44216	1.9907e-06	0.000611074	8.16905e-07	0.000228871	-0.579062	-0.774961	0.669399	0.584404
b0640	holA	chr	-	669796	670828	-2.55742	-2.74867	-2.71548	-2.07545	-2.15191	-2.10433	-2.5583	-2.55618	-2.62932	-2.69012	-2.11273	-2.57695	0.00538404	0.0175423	0.000141672	0.00224415	-0.577392	-0.464227	0.670174	0.72486
b1210	hemA	chr	+	1262936	1264193	-2.29477	-2.15008	-2.4904	-1.86086	-1.76791	-1.44451	-2.69532	-2.60283	-2.39729	-2.31586	-1.74276	-2.55273	0.0199197	0.0434903	0.00661158	0.0208132	-0.573096	-0.809969	0.672173	0.570394
b3637	rpmB	chr	-	3809460	3809697	-0.269126	-0.191859	-0.371575	0.288653	0.27133	0.353924	-0.604851	-0.780161	-0.838205	-0.275351	0.293461	-0.713137	0.00245788	0.0109903	0.00190566	0.0102057	-0.568812	-1.0066	0.674172	0.497719
b3186	rplU	chr	-	3331161	3331473	-0.447984	-0.533446	-0.484263	0.0623597	0.134559	-0.0398781	-0.88481	-0.790395	-0.588754	-0.489277	0.0792403	-0.806502	0.0027323	0.0117598	0.00318911	0.0133013	-0.568517	-0.885742	0.674309	0.541209
b1091	fabH	chr	+	1147981	1148935	0.0492576	-0.0545039	-0.285763	0.42755	0.520896	0.278234	-0.288525	-0.243154	-0.370225	-0.123208	0.43975	-0.286602	0.0174105	0.0394585	0.00289677	0.0125935	-0.562957	-0.726352	0.676913	0.60443
b3702	dnaA	chr	-	3880348	3881752	-1.8023	-1.88442	-1.93167	-1.33256	-1.28284	-1.46099	-2.02353	-1.77929	-2.08292	-1.88781	-1.32499	-1.95966	0.00210614	0.0100193	0.00942999	0.0260023	-0.562825	-0.634678	0.676975	0.644084
b2532	trmJ	chr	-	2660604	2661345	-1.65943	-1.45217	-1.67883	-1.01307	-1.06827	-1.02418	-1.77936	-1.7298	-2.04081	-1.59132	-1.04112	-1.81098	0.0127711	0.0319599	0.0118202	0.0301374	-0.550197	-0.769858	0.682927	0.586475
b1717	rpmI	chr	-	1797825	1798023	0.758521	0.701627	0.741971	1.35677	1.27303	1.1675	0.624307	0.672312	0.761661	0.731552	1.28155	0.665064	0.00638874	0.0198377	0.00150045	0.00859298	-0.550003	-0.616491	0.683019	0.652256
b1719	thrS	chr	-	1798665	1800594	-0.120004	-0.17449	-0.111027	0.460863	0.333793	0.506761	-0.0218429	-0.105001	0.0330208	-0.132181	0.410348	-0.0506296	0.003704	0.0140052	0.00259438	0.0118863	-0.542528	-0.460977	0.686567	0.726494
b4147	efp	chr	+	4373721	4374288	0.681593	0.616782	0.547086	1.10115	1.20183	1.08492	0.265166	0.339002	0.362921	0.611083	1.14664	0.307171	0.000659504	0.00533697	9.18188e-05	0.00182291	-0.535557	-0.839468	0.689892	0.55885
b3250	mreC	chr	-	3396896	3398000	-1.97979	-2.0643	-2.04794	-1.46793	-1.47573	-1.62048	-2.32905	-1.97509	-2.41615	-2.0383	-1.5028	-2.24742	0.00274993	0.0117598	0.0227909	0.0467433	-0.535501	-0.744628	0.689919	0.596822
b1095	fabF	chr	+	1151161	1152403	-0.32471	-0.330424	-0.324888	0.125581	0.213442	0.326092	-0.549424	-0.461833	-0.697335	-0.332902	0.202496	-0.542343	0.0109507	0.028707	0.00104362	0.00658571	-0.535398	-0.744838	0.689968	0.596735
b3967	murI	chr	+	4163450	4164308	-1.56684	-1.43495	-1.33984	-0.997374	-0.843341	-0.829613	-1.53432	-1.65177	-1.33238	-1.43478	-0.903358	-1.54869	0.00320677	0.0129978	0.00888237	0.0250016	-0.531422	-0.645329	0.691872	0.639347
b0526	cysS	chr	+	553833	555219	-0.138716	-0.239103	-0.270188	0.164717	0.433321	0.264756	-0.373669	-0.365107	-0.402935	-0.225049	0.306104	-0.37856	0.0109125	0.0286614	0.0121212	0.0304225	-0.531153	-0.684664	0.692001	0.622151
b2609	rpsP	chr	-	2743958	2744207	0.188469	0.240128	0.20323	0.784051	0.680337	0.679931	-0.407354	-0.344416	-0.192524	0.216203	0.717412	-0.367086	0.0013922	0.00775454	0.000652882	0.00506324	-0.501209	-1.0845	0.706514	0.471556
b4025	pgi	chr	+	4231780	4233430	1.66014	1.74427	1.44824	2.0777	2.19571	1.90013	1.5445	1.54971	1.45178	1.60079	2.08985	1.53244	0.0232156	0.0485559	0.0151455	0.0354028	-0.489061	-0.557413	0.712489	0.679519
b3822	recQ	chr	+	4003886	4005716	-2.59659	-2.71931	-2.63193	-2.12262	-2.231	-2.36205	-2.90425	-3.2194	-3.08039	-2.68323	-2.19455	-3.00837	0.0131188	0.0323409	0.00250839	0.0117928	-0.48868	-0.813822	0.712677	0.568873
b1246	oppD	chr	+	1302777	1303791	-0.545888	-0.534711	-0.44929	-0.101685	-0.0286306	0.147853	-0.382977	-0.373082	-0.502154	-0.505578	-0.0193266	-0.390864	0.0108409	0.0286614	0.0136992	0.0330602	-0.486251	-0.371537	0.713878	0.772959
b4258	valS	chr	-	4479004	4481860	0.403605	0.401638	0.569476	0.9964	0.935873	0.879309	0.483555	0.545807	0.354205	0.462849	0.948985	0.487321	0.00372228	0.0140052	0.0040445	0.0156422	-0.486136	-0.461664	0.713935	0.726148
b3314	rpsC	chr	-	3447203	3447905	0.538474	0.525976	0.554957	1.0564	1.01065	0.991756	0.259504	0.326644	0.293895	0.538999	1.02429	0.287491	0.000328963	0.00415107	1.18371e-05	0.00062948	-0.485286	-0.736795	0.714355	0.600071
b1123	potD	chr	-	1181005	1182052	1.29899	1.3887	1.43141	1.883	1.79675	2.00085	0.808784	0.86933	0.470977	1.38399	1.86572	0.775377	0.00314742	0.0128047	0.00396289	0.0154066	-0.481728	-1.09034	0.716119	0.469649
b0772	ybhC	chr	-	805220	806504	0.346246	0.457059	0.357218	0.808503	0.916338	0.866091	0.737948	0.676066	0.710266	0.392536	0.861154	0.714514	0.000575502	0.00524536	0.0200187	0.042766	-0.468618	-0.14664	0.722657	0.903352
b3313	rplP	chr	-	3446780	3447191	0.771364	0.787009	0.904863	1.29971	1.31042	1.18441	0.67983	0.63498	0.557721	0.826484	1.28194	0.649318	0.00161435	0.0084939	0.000310816	0.00330575	-0.455456	-0.632622	0.729279	0.645003
b3706	mnmE	chr	+	3884850	3886215	-0.229448	-0.263406	-0.350185	0.133444	0.158771	0.225139	-0.746497	-0.619117	-1.05071	-0.289935	0.165183	-0.776827	0.000777407	0.00579064	0.0136299	0.0329998	-0.455118	-0.94201	0.729451	0.520507
b3175	secG	chr	-	3320194	3320527	-3.27478	-3.21939	-3.29536	-2.81744	-2.86418	-2.64815	-3.54917	-3.74055	-3.46994	-3.26297	-2.81007	-3.60075	0.0109115	0.0286614	0.00170116	0.00952263	-0.452893	-0.790676	0.730576	0.578073
b2276	nuoN	chr	-	2388069	2389527	-0.718215	-0.58491	-0.571748	-0.235003	-0.11758	-0.170694	-0.701568	-0.621175	-0.818691	-0.621612	-0.169831	-0.690658	0.00211314	0.0100206	0.00292711	0.0126333	-0.451781	-0.520827	0.73114	0.696972
b0406	tgt	chr	+	425360	426488	-1.4597	-1.17377	-1.27304	-0.710262	-0.958984	-0.795501	-1.45893	-1.20241	-1.24984	-1.28945	-0.840824	-1.32315	0.0129225	0.0320778	0.0110598	0.0290387	-0.448623	-0.482329	0.732742	0.715821
b2393	nupC	chr	+	2511063	2512266	1.31462	1.39968	1.45368	1.91048	1.83122	1.78653	0.820699	0.883013	0.750532	1.4011	1.84696	0.822897	0.00118723	0.007157	4.21979e-05	0.0012823	-0.445853	-1.02406	0.73415	0.491731
b1782	mipA	chr	-	1863749	1864496	1.38692	1.54463	1.41765	1.76248	2.03477	1.81732	1.15393	1.20435	1.30201	1.44695	1.89167	1.19895	0.0190287	0.0421007	0.00601365	0.0193898	-0.444729	-0.692728	0.734723	0.618683
b0814	ompX	chr	+	849672	850188	1.14761	1.15649	1.14737	1.51586	1.58089	1.75216	-0.0378827	-0.0583541	-0.0126988	1.14568	1.58802	-0.0457459	0.0219671	0.0464617	0.00132837	0.00791177	-0.44234	-1.63377	0.73594	0.322245
b3701	dnaN	chr	-	3879243	3880344	-0.0123926	-0.0580437	-0.17993	0.277539	0.370371	0.331217	-0.76701	-0.699464	-1.02911	-0.107561	0.328371	-0.76658	0.00508281	0.0170842	0.00487625	0.017046	-0.435931	-1.09495	0.739216	0.468152
b3734	atpA	chr	-	3916338	3917880	0.447469	0.272069	0.384343	0.840122	0.778407	0.695465	0.511696	0.536509	0.599736	0.356802	0.787785	0.5409	0.00416862	0.015057	0.0161501	0.03698	-0.430983	-0.246885	0.741756	0.842714
b3987	rpoB	chr	+	4179267	4183296	1.04386	1.00081	1.01023	1.40875	1.47459	1.42315	0.0455804	0.0885586	0.0955203	1.01583	1.4421	0.0674221	0.000173923	0.00313669	1.38326e-06	0.000228871	-0.426266	-1.37468	0.744185	0.385639
b3426	glpD	chr	+	3560035	3561541	0.669791	0.763032	0.879986	1.20656	1.20126	1.0926	0.470548	0.504426	0.234182	0.779134	1.18425	0.443937	0.00881774	0.0248667	0.00522943	0.017705	-0.405121	-0.740318	0.755173	0.598608
b0903	pflB	chr	-	950494	952777	2.20665	2.19123	2.10727	2.60821	2.5381	2.5128	0.586822	0.516065	0.652479	2.1639	2.5575	0.567229	0.000815571	0.00589309	5.69007e-06	0.000502826	-0.393605	-1.99027	0.761225	0.251691
b2346	vacJ	chr	-	2462273	2463029	-0.588801	-0.534042	-0.459067	-0.183943	-0.0887263	-0.219688	-0.543097	-0.425584	-0.35697	-0.521511	-0.141167	-0.468468	0.00260083	0.0114575	0.0173875	0.0390498	-0.380345	-0.327301	0.768254	0.797026
b2029	gnd	chr	-	2097885	2099292	1.44901	1.37736	1.38669	1.77206	1.79719	1.73412	1.30375	1.33652	1.23901	1.39923	1.77708	1.30119	0.000294419	0.00394941	0.000401314	0.00388024	-0.377849	-0.475893	0.769584	0.719022
b3320	rplC	chr	-	3450318	3450948	0.923897	0.847771	0.792103	1.22588	1.16477	1.24153	0.681682	0.712219	0.67186	0.846314	1.20022	0.69185	0.00286158	0.0120705	0.000279389	0.00320008	-0.353902	-0.508366	0.782465	0.703018
b2925	fbaA	chr	-	3068186	3069266	1.71117	1.632	1.73824	2.1179	1.98332	2.06137	1.73452	1.81354	1.69669	1.69437	2.04792	1.75272	0.00234058	0.0107234	0.00438559	0.0163403	-0.353553	-0.295205	0.782654	0.814957
b3705	yidC	chr	+	3883098	3884745	-0.886538	-0.819881	-0.759046	-0.468633	-0.447383	-0.524507	-1.17784	-1.23109	-1.30065	-0.815815	-0.466071	-1.22489	0.00283032	0.012001	0.000168007	0.00250162	-0.349744	-0.75882	0.784723	0.59098
b0444	queC	chr	-	464075	464771	0.200382	0.364172	0.288179	0.716829	0.586171	0.587709	0.0446746	0.0676036	0.149294	0.294	0.637829	0.0647135	0.00584339	0.0186221	0.00082452	0.0057101	-0.343829	-0.573115	0.787947	0.672164
b1830	prc	chr	-	1910791	1912840	-1.7864	-1.78161	-1.57978	-1.41309	-1.45279	-1.2187	-1.7047	-1.74444	-1.84767	-1.71224	-1.40026	-1.73846	0.0235643	0.0490045	0.0142928	0.0341058	-0.311983	-0.338196	0.805534	0.79103
b3736	atpF	chr	-	3918440	3918911	-0.66583	-0.466043	-0.542308	-0.180756	-0.302754	-0.20369	-0.881682	-0.927908	-1.02386	-0.550773	-0.243567	-0.922699	0.0131176	0.0323409	0.000235436	0.00304832	-0.307206	-0.679131	0.808206	0.624541
b3339	tufA	chr	-	3468166	3469351	1.20594	1.19189	1.2387	1.47161	1.55413	1.43924	1.15207	1.1896	1.08541	1.2157	1.50806	1.1592	0.00757083	0.0222786	0.00173522	0.00964086	-0.292365	-0.348864	0.816562	0.785202
b0733	cydA	chr	+	770680	772249	1.43472	1.51223	1.35918	1.76501	1.71667	1.64047	-0.224839	-0.155013	-0.146527	1.43208	1.721	-0.18651	0.00976638	0.0264833	6.22579e-06	0.000502826	-0.288917	-1.90751	0.818516	0.266552
b2513	yfgM	chr	-	2636684	2637305	0.159157	0.139883	0.0669817	0.328485	0.463743	0.431382	-0.00146237	0.211559	-0.00337361	0.120341	0.406178	0.0543401	0.00640565	0.0198377	0.023042	0.0468709	-0.285837	-0.351838	0.820266	0.783585
b0465	kefA	chr	+	485759	489122	-1.34929	-1.35171	-1.4464	-1.13915	-1.08183	-1.06822	-1.77017	-1.95923	-1.82693	-1.38676	-1.10429	-1.88019	0.00288526	0.0121019	0.00216344	0.0110784	-0.282475	-0.775907	0.822179	0.584021
b3297	rpsK	chr	-	3439730	3440120	0.641298	0.702058	0.635894	0.8717	0.940567	1.03217	0.239414	0.168317	0.20515	0.656846	0.928936	0.204121	0.0132323	0.0324594	0.00108387	0.00678101	-0.27209	-0.724814	0.828119	0.605075
b3256	accC	chr	+	3403938	3405288	-0.707317	-0.639378	-0.641324	-0.427974	-0.392907	-0.368822	-1.06807	-1.10667	-1.10016	-0.658567	-0.399369	-1.07911	0.000946472	0.00609726	1.41995e-05	0.000642389	-0.259197	-0.679736	0.835553	0.62428
b2607	trmD	chr	-	2742593	2743361	-3.97242	-3.95611	-3.91051	-3.72659	-3.70429	-3.71757	-5.09554	-5.11429	-5.18525	-3.94389	-3.71233	-5.10923	0.00309469	0.0126246	0.000190626	0.0026183	-0.23156	-1.39691	0.851713	0.379743
b3301	rplO	chr	-	3442126	3442561	0.424117	0.422856	0.401674	0.665885	0.623736	0.600366	0.154667	0.210624	0.129851	0.412084	0.631697	0.165447	0.00362323	0.0139767	0.000147953	0.00227115	-0.219613	-0.46625	0.858796	0.723844
b3065	rpsU	chr	+	3208802	3209018	-0.0549035	-0.0269091	-0.0207319	0.128631	0.203798	0.17072	-1.12758	-1.04532	-1.23828	-0.0332412	0.174145	-1.13138	0.00414645	0.015057	0.000526245	0.0045769	-0.207386	-1.30553	0.866105	0.404573
b0169	rpsB	chr	+	189873	190599	0.95633	0.904906	0.98633	1.16159	1.0839	1.15665	0.256063	0.348993	0.283436	0.954096	1.12602	0.291088	0.00595385	0.0187427	2.49286e-05	0.000962096	-0.171919	-0.834927	0.887661	0.560612
b3300	secY	chr	-	3440787	3442119	-1.90033	-1.96386	-1.87958	-1.74875	-1.81147	-1.7792	-2.57632	-2.56053	-2.51342	-1.91634	-1.78309	-2.56617	0.0153812	0.0362958	8.06428e-06	0.000518793	-0.133253	-0.783083	0.911773	0.581123
b1823	cspC	chr	-	1905249	1905459	-0.241088	-0.272627	-0.209625	-0.366244	-0.426551	-0.353191	0.733806	0.611301	0.704979	-0.234333	-0.394547	0.686665	0.00928017	0.0258284	7.29687e-05	0.00158732	0.160213	1.08121	1.11745	2.11581
b2286	nuoC	chr	-	2400076	2401867	0.0796492	0.0280641	0.131629	-0.102708	-0.166865	-0.178025	1.09157	1.13424	0.914636	0.08037	-0.144248	1.08325	0.00455385	0.0159546	0.00128406	0.00777224	0.224618	1.2275	1.16847	2.34161
b1819	manZ	chr	+	1901909	1902770	0.0448123	-0.0474024	0.0311176	-0.198611	-0.268551	-0.225222	1.37952	1.14986	0.990904	-0.000111164	-0.234064	1.2403	0.00348877	0.0137428	0.00518785	0.017705	0.233953	1.47437	1.17605	2.77862
b0126	can	chr	-	142007	142670	-0.0516353	-0.197078	-0.170247	-0.333077	-0.463229	-0.390811	0.235649	0.329748	0.601579	-0.159841	-0.399329	0.321437	0.0126262	0.0316505	0.0119573	0.0303289	0.239488	0.720766	1.18057	1.64806
b4036	lamB	chr	+	4245993	4247334	0.466697	0.500075	0.522534	0.250882	0.221862	0.14511	3.74243	3.54995	3.8358	0.49609	0.219515	3.69153	0.00386812	0.0142213	0.000130678	0.002162	0.276575	3.47201	1.21132	11.0963
b1854	pykA	chr	+	1935672	1937115	0.656551	0.781433	0.753219	0.427738	0.483059	0.274756	1.16545	1.16003	1.11409	0.734806	0.428413	1.15069	0.0156616	0.0367246	0.00448097	0.0165974	0.306392	0.722281	1.23661	1.64979
b0431	cyoB	chr	-	447873	449865	-0.879645	-0.84751	-0.791911	-1.15899	-1.12545	-1.18656	0.910911	0.867922	0.654576	-0.839237	-1.1479	0.849689	0.000937068	0.00606649	0.00103282	0.00657208	0.308662	1.99759	1.23856	3.99332
b3498	prlC	chr	-	3641162	3643205	0.949101	0.835641	0.965004	0.670203	0.561778	0.573531	1.77019	1.89343	1.49997	0.913706	0.599124	1.76988	0.00448826	0.0158366	0.00675384	0.020951	0.314582	1.17075	1.24365	2.25129
b0118	acnB	chr	+	131614	134212	0.450361	0.272194	0.352097	0.0138786	0.0222406	-0.0466874	1.66197	1.78397	1.56711	0.351427	0.00972226	1.68982	0.0103775	0.0277916	0.000480579	0.00439007	0.341705	1.6801	1.26725	3.20449
b3844	fre	chr	+	4024549	4025251	-0.363304	-0.363143	-0.223528	-0.728924	-0.664097	-0.688501	-0.375899	-0.323236	-0.387475	-0.303915	-0.685339	-0.358144	0.00749659	0.0221917	0.00026852	0.00319861	0.381424	0.327195	1.30263	1.25457
b3809	dapF	chr	+	3992784	3993609	-1.38796	-1.60737	-1.52461	-1.79429	-2.03089	-1.86664	-1.50741	-1.49352	-1.61298	-1.52702	-1.9207	-1.56221	0.0148614	0.0354057	0.0192654	0.0420002	0.393675	0.358486	1.31374	1.28208
b2898	ygfZ	chr	+	3039334	3040315	1.01241	1.07936	1.04999	0.693975	0.608991	0.602209	1.10399	1.16827	0.933614	1.04935	0.645081	1.10353	0.000677132	0.00545	0.0142748	0.0341058	0.404266	0.458451	1.32342	1.37407
b3803	hemX	chr	-	3985907	3987089	-0.120744	-0.0974656	-0.343457	-0.717359	-0.517861	-0.702836	-0.141966	0.00119851	-0.180479	-0.21609	-0.63287	-0.110774	0.0115756	0.0296843	0.00337203	0.01387	0.416781	0.522096	1.33495	1.43604
b2243	glpC	chr	+	2353542	2354733	0.0427702	0.096925	-0.0179907	-0.540534	-0.318311	-0.333975	1.37744	1.31378	1.2888	0.0325869	-0.414328	1.33933	0.0135327	0.033033	0.000546018	0.0045769	0.446915	1.75365	1.36312	3.37211
b3399	yrfG	chr	+	3526690	3527359	-0.911875	-1.10747	-1.06048	-1.53537	-1.36054	-1.64933	-0.573748	-0.063865	-0.636202	-1.02	-1.47437	-0.444555	0.0116091	0.029701	0.0141593	0.0338959	0.45437	1.02981	1.37018	2.04176
b4037	malM	chr	+	4247576	4248497	-2.1573	-2.31349	-2.35541	-2.72339	-2.77518	-2.71809	0.774369	0.795393	0.836235	-2.27565	-2.74075	0.785736	0.0111374	0.0289418	1.66963e-08	1.24304e-05	0.4651	3.52649	1.38041	11.5234
b2922	yggE	chr	-	3065361	3066102	1.09278	0.888063	0.955184	0.506112	0.490506	0.436694	1.63078	1.70822	1.66907	0.95725	0.49047	1.65348	0.00822929	0.023474	2.73201e-06	0.000299317	0.466779	1.16301	1.38202	2.23924
b3617	kbl	chr	-	3789377	3790574	1.44804	1.37077	1.4191	0.874565	0.952089	0.885413	1.5424	1.58377	1.27412	1.40448	0.916176	1.52701	0.000108325	0.00244387	0.0230298	0.0468709	0.488304	0.61083	1.4028	1.52714
b0724	sdhB	chr	+	756911	757628	-1.68621	-1.47783	-1.48556	-1.99718	-2.03688	-2.01215	1.60829	1.99658	1.46923	-1.52998	-2.01852	1.7184	0.0184697	0.0410333	0.00172185	0.00960236	0.48854	3.73692	1.40302	13.333
b4396	rob	chr	-	4632463	4633333	-0.63822	-0.739608	-0.725665	-1.24446	-1.2046	-1.01639	-0.616161	-0.458757	-0.6646	-0.69783	-1.19543	-0.588279	0.0120615	0.0304917	0.00376848	0.0149608	0.4976	0.607151	1.41186	1.52325
b2093	gatB	chr	-	2172303	2172588	1.05	1.1976	0.975714	0.58747	0.492632	0.653502	2.51068	2.58824	2.86336	1.06663	0.554405	2.58438	0.00476384	0.0164198	0.000659684	0.00506721	0.512224	2.02997	1.42625	4.08396
b3029	ygiN	chr	+	3171163	3171478	-0.730843	-0.501957	-0.710455	-1.20107	-1.10847	-1.27736	0.377726	0.646315	0.620627	-0.650718	-1.16904	0.502162	0.00526833	0.0172408	0.000277774	0.00320008	0.518321	1.6712	1.43229	3.1848
b0623	cspE	chr	+	656514	656724	-3.63517	-3.68676	-3.66574	-4.20357	-4.22731	-4.03272	-3.78436	-3.84599	-3.57778	-3.65702	-4.1853	-3.78668	0.0115269	0.0296783	0.0169623	0.0382283	0.528278	0.39861	1.44221	1.31824
b2677	proV	chr	+	2802836	2804039	0.102446	0.0383424	0.0963144	-0.385337	-0.559757	-0.34328	0.898868	1.05107	1.37031	0.0774908	-0.461818	1.00692	0.011031	0.028816	0.00259394	0.0118863	0.539309	1.46873	1.45328	2.76779
b1603	pntA	chr	-	1674394	1675927	0.753067	0.702024	0.842341	0.136466	0.256572	0.225505	1.08572	0.989296	0.919723	0.764991	0.211208	1.02424	0.000554404	0.00524078	0.000301713	0.00330332	0.553783	0.813031	1.46793	1.7569
b3931	hslU	chr	-	4118438	4119770	0.588233	0.358889	0.680122	-0.0655108	0.0145687	0.00420659	0.747167	0.734144	0.836115	0.542677	-0.0163816	0.756347	0.0221715	0.0468276	6.32212e-05	0.00151739	0.559058	0.772729	1.47331	1.7085
b3433	asd	chr	-	3571797	3572901	0.136837	0.093378	0.199254	-0.415705	-0.433834	-0.406156	0.140213	-0.0833636	0.0615957	0.140181	-0.428324	0.041706	0.00173791	0.00886216	0.0185726	0.0409698	0.568505	0.47003	1.48299	1.38514
b3225	nanA	chr	-	3370704	3371598	0.692388	0.689335	0.756589	0.135449	0.0937325	0.220086	2.91112	2.80479	2.94794	0.714015	0.134267	2.87107	0.00065263	0.00531671	1.38337e-06	0.000228871	0.579748	2.7368	1.49459	6.6659
b2092	gatC	chr	-	2170944	2172300	0.753486	0.806295	0.771999	0.215315	0.206818	0.148194	1.45908	1.47062	1.26151	0.77953	0.198457	1.43922	4.62521e-05	0.00170812	0.0015266	0.00870923	0.581073	1.24076	1.49596	2.36323
b3417	malP	chr	-	3548101	3550495	0.469652	0.561249	0.687299	0.0949173	0.0238053	-0.294026	1.65686	1.52485	1.72015	0.587217	-0.0176326	1.6194	0.0181022	0.0404718	0.00127207	0.00773109	0.60485	1.63703	1.52082	3.11025
b1795	yeaQ	chr	-	1877030	1877279	-2.22286	-2.03984	-1.85014	-2.74592	-2.57382	-2.64933	-2.25084	-1.98829	-2.23158	-2.0283	-2.64193	-2.1514	0.0159472	0.0373092	0.0121058	0.0304225	0.613631	0.490533	1.53011	1.40496
b0014	dnaK	chr	+	12162	14079	0.593482	0.440124	0.686334	-0.015331	-0.0620702	-0.0375985	1.88098	1.80086	1.94261	0.57511	-0.0403518	1.85941	0.0113409	0.0293169	0.000136798	0.00219024	0.615462	1.89976	1.53205	3.73151
b2239	glpQ	chr	-	2347956	2349033	-0.128385	-0.228124	-0.138042	-0.791131	-0.868564	-0.574705	1.26001	1.25261	1.68514	-0.167217	-0.79203	1.31514	0.0139223	0.033653	0.000611877	0.00482056	0.624813	2.10717	1.54201	4.30846
b0678	nagB	chr	-	702033	702834	1.26443	1.19499	1.20118	0.710384	0.585014	0.411081	1.45072	1.65737	2.11247	1.21872	0.58767	1.59899	0.0130316	0.0322326	0.0148455	0.0350872	0.631048	1.01132	1.54869	2.01576
b4488	ilvG	chr	+	3948582	3950227	-2.63681	-2.61376	-2.56756	-3.34952	-3.13857	-3.37001	-2.61577	-2.52457	-2.80859	-2.60376	-3.25162	-2.60165	0.00793764	0.0229106	0.00491042	0.0170552	0.647859	0.649971	1.56684	1.56914
b3176	glmM	chr	-	3320754	3322092	0.797688	0.566463	0.499504	-0.136637	-0.0267765	-0.0363534	0.215766	0.374757	0.214658	0.594392	-0.0673719	0.269808	0.00916951	0.02563	0.00924582	0.0256245	0.661764	0.33718	1.58202	1.26328
b4000	hupA	chr	+	4198303	4198576	1.08324	1.11439	1.12774	0.547356	0.307717	0.612603	1.30296	1.30145	1.40301	1.11176	0.443866	1.31594	0.019961	0.0435167	0.00629836	0.0200463	0.66789	0.87207	1.58875	1.83029
b3222	nanK	chr	-	3367496	3368372	-1.77938	-1.54114	-1.49131	-2.29097	-2.28672	-2.34352	1.26724	1.12367	0.383968	-1.60742	-2.30154	1.05355	0.0128453	0.032038	0.00689631	0.0210005	0.694116	3.35509	1.61789	10.2325
b3236	mdh	chr	-	3381351	3382290	0.78566	0.74259	0.743049	0.114666	0.0347734	0.0112193	1.53591	1.51	1.3245	0.753807	0.0574728	1.4958	0.000393811	0.00450098	0.000434743	0.00407127	0.696334	1.43832	1.62038	2.71006
b4138	dcuA	chr	-	4363494	4364796	0.878754	0.782153	0.707813	-0.0309962	0.0817557	0.292702	0.84494	1.00983	0.822142	0.77567	0.0777092	0.899565	0.00793946	0.0229106	0.00421515	0.0160521	0.69796	0.821856	1.62221	1.76768
b3405	ompR	chr	-	3533886	3534606	0.979172	0.814635	1.23488	0.387498	0.210354	0.381043	0.832122	0.906778	0.731439	1.00939	0.302713	0.827916	0.0168425	0.0387062	0.003159	0.01325	0.70668	0.525203	1.63204	1.43914
b2095	gatZ	chr	-	2173080	2174343	1.26213	1.22567	1.32862	0.606286	0.521614	0.604853	2.14929	2.09811	2.13599	1.27711	0.56569	2.1314	7.48898e-05	0.00196091	1.4237e-05	0.000642389	0.711419	1.56571	1.63741	2.96024
b2287	nuoB	chr	-	2401972	2402635	0.653138	0.86944	0.758894	0.0309563	0.076793	-0.0215937	1.40954	1.28798	1.54506	0.762389	0.0444735	1.38952	0.00239784	0.0108853	0.000966946	0.00631484	0.717916	1.34505	1.6448	2.54038
b2463	maeB	chr	-	2574119	2576399	0.311048	0.452484	0.331444	-0.323045	-0.361387	-0.417749	1.82914	1.68526	1.55952	0.359989	-0.35976	1.73371	0.000425881	0.0045952	0.000472236	0.00435493	0.719749	2.09347	1.6469	4.26773
b1818	manY	chr	+	1901105	1901906	1.25804	1.48248	1.41297	0.684123	0.579956	0.881008	2.12936	2.06349	2.09029	1.39306	0.671797	2.1014	0.0047387	0.0163711	0.00290099	0.0125935	0.721258	1.42961	1.64862	2.69373
b1002	agp	chr	+	1064807	1066049	0.726869	1.05916	0.806086	0.263458	0.0798704	0.121406	2.32125	2.06181	2.12516	0.867769	0.145428	2.19564	0.00753648	0.0222259	6.57468e-05	0.00152964	0.722341	2.05021	1.64986	4.14167
b0925	ycbB	chr	+	980269	982117	-1.12235	-0.856447	-0.844272	-1.80543	-1.49649	-1.68495	-0.909561	-0.955562	-1.27264	-0.932453	-1.66321	-1.03374	0.00484476	0.0165455	0.0148268	0.0350872	0.730752	0.629466	1.6595	1.54699
b2678	proW	chr	+	2804031	2805096	-0.295491	-0.0767395	-0.245781	-0.890139	-0.901304	-1.17009	0.561526	1.0301	0.605935	-0.20347	-0.948464	0.716425	0.00321236	0.0129978	0.00145504	0.00843016	0.744994	1.66489	1.67597	3.17089
b2369	evgA	chr	+	2481776	2482391	-0.896752	-0.738447	-0.524481	-1.60165	-1.37156	-1.44497	-0.626866	-0.852571	-0.344971	-0.702472	-1.47201	-0.701326	0.00693804	0.0208934	0.0150096	0.0352513	0.769534	0.77068	1.70472	1.70607
b4221	ytfN	chr	+	4442134	4445914	-1.7704	-1.97739	-1.96997	-2.68549	-2.72125	-2.74411	-2.39109	-2.20282	-2.39989	-1.92675	-2.69825	-2.30904	0.00469965	0.0163457	0.0208439	0.0438989	0.771494	0.389204	1.70704	1.30967
b3964	yijD	chr	+	4159793	4160153	-0.301988	-0.428337	-0.0876824	-1.01299	-1.13203	-0.958083	0.459868	0.842109	-0.00369167	-0.2739	-1.05405	0.493135	0.00651356	0.0200386	0.0227618	0.0467433	0.780148	1.54718	1.71731	2.92246
b0432	cyoA	chr	-	449886	450834	-0.527787	-0.64697	-0.530957	-1.41476	-1.32822	-1.24723	0.729921	0.743976	0.857836	-0.565296	-1.34639	0.755558	0.000326004	0.00414889	6.41619e-06	0.000502826	0.781098	2.10195	1.71844	4.2929
b0809	glnQ	chr	-	844963	845686	0.177662	0.0671361	-0.239044	-0.995857	-0.717217	-0.763973	0.779746	0.539375	0.284292	-0.0369581	-0.826229	0.61108	0.00762632	0.0223976	0.00275813	0.012296	0.789271	1.43731	1.7282	2.70815
b0929	ompF	chr	-	985116	986205	0.697701	0.521946	0.624963	-0.136741	-0.206747	-0.21499	1.06214	0.955595	1.46178	0.6058	-0.183686	1.07857	0.000920368	0.00606649	0.0112702	0.0293311	0.789486	1.26225	1.72846	2.3987
b2587	kgtP	chr	-	2722469	2723768	-1.70178	-1.70265	-1.88768	-2.50087	-2.59219	-2.65488	-1.32607	-1.27124	-1.15119	-1.77709	-2.57235	-1.27206	0.000691699	0.00546564	4.73472e-05	0.00133019	0.795262	1.30029	1.73539	2.46279
b0212	gloB	chr	-	234026	234782	0.559758	0.439915	0.615689	-0.254416	-0.306948	-0.263272	0.688228	0.5991	0.743404	0.529512	-0.276201	0.633684	0.00203612	0.009759	0.000578247	0.0047145	0.805713	0.909885	1.74801	1.8789
b3609	secB	chr	-	3781683	3782151	1.01711	1.05074	1.08748	0.181554	0.246796	0.405164	1.52099	1.46257	1.40301	1.05727	0.250479	1.47805	0.00420366	0.015057	0.000559654	0.00460401	0.806795	1.22757	1.74932	2.34173
b0958	sulA	chr	-	1019632	1020142	0.102438	0.541125	0.173204	-0.299042	-0.563678	-0.78426	0.3717	0.325633	0.496873	0.284472	-0.524663	0.356239	0.0136808	0.0332312	0.0130539	0.0321276	0.809135	0.880902	1.75216	1.84153
b2366	dsdA	chr	+	2477223	2478552	1.41706	1.24208	0.912919	0.353599	0.432176	0.0540528	3.60439	3.90941	3.54122	1.14897	0.319908	3.70285	0.00957008	0.0260986	3.02072e-05	0.00107092	0.829064	3.38294	1.77653	10.432
b3358	yhfK	chr	+	3484812	3486915	-1.88418	-1.84422	-1.94714	-2.79802	-2.64187	-2.74751	-2.39891	-2.26208	-2.40161	-1.88875	-2.72063	-2.36874	0.000280296	0.00386445	0.00451003	0.0166636	0.831886	0.351891	1.78001	1.27623
b3428	glgP	chr	-	3562156	3564604	-1.80454	-1.58681	-1.79339	-2.57273	-2.54607	-2.67681	-1.86882	-1.70643	-1.30859	-1.73318	-2.57212	-1.75609	0.00138865	0.00775454	0.0231023	0.0469295	0.838938	0.816032	1.78873	1.76056
b2741	rpoS	chr	-	2864580	2865573	-0.401372	-0.419734	-0.446338	-1.25033	-1.27567	-1.26712	0.165547	0.183482	0.414315	-0.423704	-1.26668	0.204155	7.25432e-06	0.000635393	0.0025818	0.0118863	0.842974	1.47083	1.79374	2.77182
b0811	glnH	chr	-	846480	847227	1.04702	1.00313	1.06797	0.180796	0.160625	0.323703	1.56324	1.85331	2.13978	1.03981	0.194132	1.71769	0.00152043	0.00823242	0.00626318	0.0200126	0.845681	1.52356	1.79711	2.87499
b2552	hmp	chr	+	2683856	2685047	1.25194	1.23376	0.943088	0.47947	0.253335	0.0242262	1.81345	1.27957	1.08598	1.12342	0.275808	1.48972	0.0069413	0.0208934	0.016934	0.0382283	0.847609	1.21391	1.79952	2.31965
b2696	csrA	chr	-	2816982	2817168	-1.54456	-1.58679	-1.46734	-2.44133	-2.34328	-2.32814	-0.924436	-0.95925	-0.847463	-1.52325	-2.37273	-0.929102	7.32902e-05	0.00196091	7.57321e-06	0.000512569	0.849483	1.44363	1.80185	2.72004
b4034	malE	chr	-	4243251	4244442	1.12816	1.11502	1.10988	0.222606	0.320632	0.240911	2.79739	2.80637	3.06728	1.11769	0.264959	2.84029	0.000899187	0.00606649	0.000382278	0.00374481	0.852733	2.57533	1.80592	5.96008
b0956	ycbG	chr	+	1017707	1018160	-1.00967	-1.23141	-0.915783	-1.90977	-1.87797	-2.22552	-0.278085	-0.825481	-0.947492	-1.06283	-1.92789	-0.665397	0.00307789	0.0125906	0.0103059	0.0276496	0.86506	1.26249	1.82142	2.39909
b0439	lon	chr	+	458111	460466	-0.501577	-0.480613	-0.39318	-1.31703	-1.31698	-1.31428	-0.284939	-0.237904	-0.397531	-0.449008	-1.31953	-0.283697	0.00148423	0.00812505	0.0021874	0.0110784	0.870518	1.03583	1.82832	2.05029
b0710	ybgI	chr	+	742049	742793	1.71351	1.62576	1.0663	0.563739	0.630826	0.225139	1.89146	1.65288	1.39638	1.40109	0.522942	1.73358	0.0202621	0.0440441	0.00370145	0.0147365	0.878152	1.21064	1.83802	2.3144
b3670	ilvN	chr	-	3848824	3849115	-0.479234	-0.0183388	-0.158279	-1.02463	-1.17227	-1.0213	0.402455	0.376708	0.223349	-0.210341	-1.09574	0.336821	0.0156434	0.0367246	5.20656e-05	0.00142278	0.885397	1.43256	1.84727	2.69925
b1726	yniB	chr	-	1806720	1807257	-1.44024	-0.852001	-1.28592	-1.95159	-2.25536	-1.8815	-1.38545	-1.45979	-1.04556	-1.18793	-2.08209	-1.44309	0.0219396	0.0464617	0.0132523	0.0324551	0.894163	0.639	1.85853	1.55725
b2910	zapA	chr	+	3053633	3053963	-5.39025	-5.09004	-5.24677	-6.15254	-6.21784	-5.97243	-5.39163	-5.41361	-5.12134	-5.24072	-6.15322	-5.36929	0.00172528	0.00882798	0.00306856	0.0130173	0.912504	0.783935	1.88231	1.72182
b4376	osmY	chr	+	4609418	4610024	0.1371	0.560781	0.125895	-0.593294	-0.584666	-0.96283	1.26273	1.72012	1.40905	0.265654	-0.655076	1.43126	0.00682714	0.0206618	0.00029986	0.00330332	0.92073	2.08633	1.89307	4.24668
b2065	dcd	chr	-	2139657	2140239	-0.943979	-0.775031	-0.981251	-1.93263	-1.73392	-1.84864	-1.33762	-1.41525	-1.61349	-0.902355	-1.82536	-1.40574	0.000415117	0.00456942	0.023015	0.0468709	0.923006	0.419617	1.89606	1.33757
b4252	yjgK	chr	+	4472884	4473337	0.851849	0.999118	1.09551	-0.0563582	0.160891	0.137266	1.00875	0.729294	0.842379	0.996365	0.067846	0.882907	0.000802394	0.0058353	0.00204559	0.0106499	0.928519	0.815061	1.90332	1.75937
b3486	rbbA	chr	-	3624825	3627561	-1.64545	-1.48764	-1.62343	-2.61065	-2.3349	-2.77734	-1.09972	-1.23473	-1.89596	-1.5854	-2.51752	-1.30042	0.00917446	0.02563	0.0244135	0.0491954	0.93212	1.21709	1.90808	2.32478
b2916	argP	chr	+	3057774	3058668	-0.123838	-0.294783	0.199764	-1.13289	-0.873751	-1.24561	0.474129	-0.0182223	0.0227611	-0.0748005	-1.04613	0.190968	0.00630325	0.0197175	0.00430597	0.0162319	0.971328	1.2371	1.96064	2.35724
b0419	yajO	chr	-	436384	437359	-1.17317	-1.5419	-1.14793	-2.29443	-2.09054	-2.41613	-1.73727	-1.62329	-1.48325	-1.25921	-2.23186	-1.68496	0.0045251	0.0158912	0.00662881	0.0208234	0.97265	0.546902	1.96244	1.46095
b4239	treC	chr	-	4461076	4462732	0.626284	0.867291	0.836215	-0.264581	-0.174055	-0.140264	1.34307	1.33228	1.23059	0.784038	-0.202156	1.31564	0.00162615	0.00849594	8.53548e-06	0.000518793	0.986194	1.51779	1.98095	2.86352
b2412	zipA	chr	-	2528268	2529255	-1.76797	-1.83589	-1.95333	-2.89264	-2.80899	-2.87745	-2.51518	-2.3344	-2.3991	-1.86311	-2.85333	-2.41493	0.000602228	0.00525229	0.00545504	0.0181837	0.990215	0.438396	1.98648	1.3551
b3233	yhcB	chr	+	3378212	3378611	0.283016	0.191076	0.582542	-0.644373	-0.717702	-0.421795	0.622342	0.447571	0.206141	0.359251	-0.64409	0.48405	0.00392154	0.0143822	0.0032857	0.0136279	1.00334	1.12814	2.00464	2.18577
b3207	yrbL	chr	+	3346473	3347106	-0.88813	-0.76477	-0.829961	-1.97519	-1.7176	-1.81311	-0.944564	-0.907207	-0.837309	-0.829827	-1.83489	-0.912653	0.0015309	0.00824631	0.00233815	0.0114148	1.00507	0.92224	2.00703	1.89506
b0145	dksA	chr	-	160148	160604	-0.921149	-0.905418	-0.81249	-1.83246	-1.95444	-1.741	-1.03966	-1.06482	-1.1967	-0.870426	-1.87819	-1.08404	0.000712111	0.00546564	0.00090718	0.00608464	1.00776	0.794153	2.01079	1.73406
b1708	nlpC	chr	-	1790290	1790755	-1.62828	-1.65706	-1.38439	-2.6313	-2.47224	-2.47941	-1.09938	-1.29497	-1.20926	-1.52296	-2.53101	-1.20117	0.00163981	0.00853733	6.94966e-05	0.00157614	1.00805	1.32984	2.01119	2.51375
b0473	htpG	chr	+	494343	496218	0.835258	0.912857	0.776016	-0.264545	-0.0500514	-0.268614	1.42485	1.66264	1.5503	0.835247	-0.174689	1.52171	0.000913392	0.00606649	6.42012e-05	0.00151739	1.00994	1.6964	2.01382	3.24091
b4143	groL	chr	+	4369047	4370694	0.935948	0.800354	0.783499	-0.184423	-0.160978	-0.24404	1.2389	1.3818	1.25607	0.829809	-0.184888	1.29147	0.000324118	0.00414889	6.98625e-05	0.00157614	1.0147	1.47636	2.02048	2.78246
b3223	nanE	chr	-	3368368	3369058	-0.270679	-0.162488	0.212078	-1.27868	-0.882823	-1.03415	2.75374	2.53419	2.16239	-0.0620826	-1.07805	2.57491	0.00694575	0.0208934	0.000172783	0.00250309	1.01597	3.65296	2.02226	12.5791
b4392	slt	chr	+	4628755	4630693	-0.624597	-0.635761	-0.596985	-1.69526	-1.57572	-1.68997	-0.562081	-0.640709	-0.373417	-0.620092	-1.64941	-0.537308	0.000640483	0.00531671	0.00119706	0.00733505	1.02931	1.1121	2.04105	2.1616
b4352	yjiA	chr	-	4585931	4586888	0.823066	0.745393	1.01414	-0.128084	-0.102589	-0.525502	1.74436	1.65648	2.16844	0.861181	-0.201671	1.75972	0.00469234	0.0163457	0.000602155	0.00480624	1.06285	1.96139	2.08906	3.89436
b2494	yfgC	chr	+	2614115	2615579	-0.559005	-0.253031	-0.292859	-1.238	-1.59351	-1.3274	-0.573298	-0.675522	-0.884129	-0.355735	-1.42136	-0.66711	0.0021799	0.0102393	0.00914035	0.0255658	1.06562	0.75425	2.09308	1.68675
b2148	mglC	chr	-	2234764	2235775	-2.83685	-2.61363	-2.84906	-3.90642	-3.85957	-3.74887	2.26717	2.25521	1.91923	-2.77196	-3.85523	2.20463	0.000777789	0.00579064	5.4694e-05	0.00142876	1.08327	6.05986	2.11883	66.7113
b2289	lrhA	chr	-	2403724	2404663	-1.88005	-1.41472	-1.71727	-2.82847	-2.71478	-2.72794	-1.87592	-1.90775	-1.45786	-1.67347	-2.75731	-1.84711	0.0112384	0.0291534	0.0155696	0.0360547	1.08384	0.910194	2.11967	1.8793
b1739	osmE	chr	-	1819941	1820280	-0.887805	-1.23454	-1.1595	-2.26449	-2.16899	-2.21528	-0.323531	-0.639542	-0.458645	-1.11683	-2.20747	-0.486401	0.00590975	0.0187042	0.00135791	0.00796036	1.09064	1.72107	2.12969	3.29681
b4015	aceA	chr	+	4215131	4216436	0.861399	1.19229	0.999466	-0.192206	0.0162092	-0.125053	2.60389	2.32291	1.78211	1.02188	-0.0889801	2.3553	0.00129768	0.00748932	0.0074412	0.0223386	1.11086	2.44428	2.15975	5.44254
b1761	gdhA	chr	+	1840394	1841738	-1.61162	-1.43493	-1.6339	-2.79729	-2.50793	-2.90806	-1.81159	-1.57599	-1.99827	-1.55635	-2.66869	-1.74988	0.00302911	0.012494	0.00526862	0.017789	1.11234	0.918807	2.16195	1.89055
b2242	glpB	chr	+	2352286	2353546	0.0587446	0.187559	-0.136513	-1.14838	-1.12957	-0.904144	0.52569	0.416579	0.0173946	0.0153373	-1.1043	0.397322	0.000998466	0.0063029	0.00429029	0.0162138	1.11963	1.50162	2.17292	2.8316
b1817	manX	chr	+	1900071	1901043	1.09186	0.777555	0.907701	-0.250595	-0.273524	-0.124842	1.83415	1.52394	1.81458	0.899336	-0.240255	1.7041	0.00162374	0.00849594	0.000582821	0.00471642	1.13959	1.94436	2.20319	3.84866
b0440	hupB	chr	+	460674	460947	0.554953	0.693624	0.67104	-0.450571	-0.548445	-0.436641	0.06954	0.0397185	-0.0557845	0.647865	-0.495895	0.0285962	4.79293e-05	0.00170812	0.000671119	0.00506721	1.14376	0.524492	2.20956	1.43843
b0720	gltA	chr	-	752407	753691	-0.392573	-0.220067	-0.202534	-1.41601	-1.44704	-1.32688	2.29635	2.26675	2.94802	-0.260943	-1.41436	2.36582	0.000334715	0.00418815	0.00263751	0.0120099	1.15342	3.78018	2.22441	13.7388
b1014	putA	chr	-	1074142	1078105	-1.81295	-2.04039	-1.99481	-3.13216	-3.0145	-3.28227	0.955548	0.966432	0.196597	-1.94817	-3.10269	0.825861	0.000351972	0.00423267	0.00230764	0.0113879	1.15452	3.92855	2.2261	15.2269
b4323	uxuB	chr	+	4550923	4552384	0.0511555	-0.0897338	0.0683568	-1.1167	-1.02712	-1.61739	1.14398	0.930738	0.71959	0.00074004	-1.16502	0.989441	0.0152425	0.0360827	0.00113059	0.00701437	1.16576	2.15446	2.24351	4.45202
b4213	cpdB	chr	-	4432644	4434588	1.29524	1.25667	1.30305	0.194569	0.185535	-0.188151	1.91947	1.72586	1.23255	1.28821	0.0978575	1.71703	0.00977692	0.0264833	0.00533242	0.0179232	1.19035	1.61918	2.28208	3.072
b4140	fxsA	chr	+	4366686	4367163	-2.17767	-2.16906	-2.05756	-3.13216	-3.48749	-3.34795	-1.60723	-0.623292	-0.609169	-2.1454	-3.34177	-1.12342	0.00342691	0.0135349	0.0126611	0.0312487	1.19636	2.21835	2.29161	4.6536
b1612	fumA	chr	-	1684754	1686401	0.678691	0.744457	0.618344	-0.47342	-0.568906	-0.531924	2.02258	1.8791	1.7054	0.678501	-0.529771	1.91229	2.20519e-05	0.00126289	0.000639711	0.00498707	1.20827	2.44206	2.31061	5.43416
b1829	htpX	chr	-	1909718	1910600	-0.928561	-0.885727	-0.689995	-2.20018	-1.98409	-1.81034	-0.960492	-1.15853	-1.03092	-0.821654	-2.03113	-1.04388	0.00188961	0.00931663	0.00501971	0.0172618	1.20948	0.98726	2.31254	1.98242
b4397	creA	chr	+	4633543	4634017	1.54853	1.61244	1.34906	0.355577	0.277137	0.0441567	1.23569	1.5594	1.63489	1.48385	0.259041	1.41365	0.000548369	0.00524078	0.00165511	0.00929986	1.22481	1.15461	2.33724	2.22624
b3357	crp	chr	+	3484141	3484774	0.650708	0.920779	0.841915	-0.476357	-0.441408	-0.251607	0.567855	0.414756	0.690901	0.816506	-0.424245	0.515615	0.000395989	0.00450098	0.000941997	0.00621919	1.24075	0.939859	2.36321	1.91834
b4040	ubiA	chr	+	4251038	4251911	-0.166907	-0.597029	-0.569388	-1.77732	-1.66714	-1.77765	-0.843492	-0.862758	-0.566425	-0.475541	-1.73217	-0.834447	0.00789982	0.0228849	0.00438961	0.0163403	1.25663	0.897723	2.38937	1.86312
b3751	rbsB	chr	+	3934300	3935191	-0.803306	-0.761011	-0.686301	-1.91442	-2.00232	-2.15046	-0.23766	0.0129751	0.176434	-0.740549	-1.9975	-0.0840624	0.000549621	0.00524078	0.000520482	0.0045769	1.25695	1.91343	2.3899	3.76705
b2700	ygaD	chr	-	2821870	2822368	0.269325	0.551673	0.499909	-0.552216	-0.940094	-1.02373	-0.144934	-0.0920618	0.409725	0.451106	-0.821343	-0.0471402	0.0035504	0.0138346	0.0185383	0.0409698	1.27245	0.774203	2.41571	1.71025
b2309	hisJ	chr	-	2424027	2424810	1.73873	1.26706	1.69717	0.163481	0.32294	0.360654	1.4569	1.14902	1.04594	1.54536	0.269055	1.28419	0.00667987	0.0203177	0.00718195	0.0216476	1.2763	1.01513	2.42218	2.02109
b0795	ybhG	chr	-	828196	829195	-0.0634021	0.69335	-0.101338	-0.87024	-1.30933	-1.20353	0.280283	-0.11123	0.308163	0.136269	-1.14452	0.113022	0.0209806	0.0452093	0.00245127	0.0117362	1.28079	1.25754	2.42972	2.39088
b2210	mqo	chr	-	2303129	2304776	-1.95143	-1.75608	-1.3959	-2.86347	-3.00106	-3.14976	0.829236	1.1633	0.233081	-1.6904	-2.98633	0.828594	0.00585303	0.0186221	0.00286898	0.0125276	1.29593	3.81493	2.45535	14.0737
b4216	ytfJ	chr	-	4436730	4437285	0.838723	0.899508	0.58316	-0.359571	-0.656301	-0.592299	1.22109	1.28817	0.853963	0.75255	-0.546147	1.20672	0.000600667	0.00525229	0.00101347	0.00647661	1.2987	1.75287	2.46006	3.37027
b4214	cysQ	chr	+	4434777	4435518	-0.10194	0.0280783	-0.271263	-1.66429	-1.27099	-1.37631	0.132003	0.535906	-0.239672	-0.116204	-1.44151	0.166571	0.00120745	0.0071916	0.00808189	0.023458	1.32531	1.60808	2.50586	3.04847
b1619	hdhA	chr	-	1695296	1696064	0.840973	1.32136	0.916381	-0.140843	-0.349057	-0.418168	0.678403	1.36221	1.07178	1.02861	-0.301131	0.940329	0.00376271	0.0140777	0.0114392	0.0295711	1.32975	1.24146	2.51358	2.36438
b4019	metH	chr	+	4221850	4225534	0.552333	0.472994	0.133127	-0.786536	-1.08225	-1.17984	0.522539	-0.0872395	0.315543	0.346859	-0.990991	0.281777	0.00134488	0.00770203	0.00639225	0.0202512	1.33785	1.27277	2.52774	2.41625
b3032	cpdA	chr	-	3174027	3174855	-1.609	-1.38762	-1.21658	-2.63173	-2.78592	-2.78683	-2.30346	-2.02636	-2.29764	-1.39036	-2.73674	-2.20966	0.002414	0.0108944	0.0135618	0.032942	1.34638	0.527083	2.54273	1.44101
b3487	yhiI	chr	-	3627557	3628625	-0.447889	-0.24522	-0.677977	-1.94014	-1.8697	-1.60323	-0.928751	-0.853298	-0.435544	-0.491159	-1.85163	-0.87311	0.00133197	0.00765754	0.00672386	0.020951	1.36047	0.97852	2.56769	1.97044
b0003	thrB	chr	+	2800	3733	-0.545038	-0.800763	-0.643916	-1.94908	-2.06588	-2.06437	-0.383521	-0.390632	-0.816247	-0.663516	-2.02839	-0.428128	0.000501021	0.00504647	0.00601617	0.0193898	1.36487	1.60026	2.57554	3.03198
b0677	nagA	chr	-	700825	701974	0.0922545	-0.256914	-0.102517	-1.57578	-1.45917	-1.33782	-0.702023	-0.452859	-0.386017	-0.116259	-1.48329	-0.580795	0.000702753	0.00546564	0.00200333	0.0105405	1.36703	0.902496	2.57939	1.8693
b2518	ndk	chr	-	2642454	2642886	0.500538	0.118393	0.263637	-1.06731	-1.13541	-1.13112	1.15073	1.02917	1.12521	0.272647	-1.10915	1.09667	0.00484073	0.0165455	7.45961e-06	0.000512569	1.3818	2.20582	2.60592	4.61337
b2288	nuoA	chr	-	2402650	2403094	0.398152	0.368329	0.593772	-0.794925	-0.96002	-1.14107	-0.281525	0.319942	-0.112234	0.4553	-0.931133	-0.0768882	0.000559241	0.00524078	0.0176557	0.0394625	1.38643	0.854244	2.61431	1.80781
b3403	pck	chr	+	3530839	3532462	1.53905	1.50998	1.55471	0.153228	0.0931212	0.140502	1.59115	1.78962	1.68532	1.53781	0.123097	1.68328	1.24668e-06	0.000611074	0.000532511	0.0045769	1.41472	1.56018	2.66607	2.9489
b4480	hdfR	chr	-	3945150	3945990	-0.0788505	-0.289406	0.186838	-1.69973	-1.3672	-1.17289	-0.456683	-0.637098	0.11305	-0.0492236	-1.46507	-0.407829	0.00292709	0.0122428	0.0210568	0.0442222	1.41585	1.05724	2.66817	2.08095
b3932	hslV	chr	-	4119779	4120310	0.670247	0.281796	0.609069	-1.00823	-0.791231	-1.30179	1.04654	1.19614	0.684427	0.4936	-0.971668	1.00737	0.00146424	0.00805457	0.000694063	0.00506721	1.46527	1.97904	2.76115	3.94231
b0810	glnP	chr	-	845682	846342	0.0138741	0.4352	0.0105078	-1.25307	-1.24033	-1.70945	0.205841	-0.15795	-0.214972	0.155026	-1.32109	0.000682784	0.0018031	0.0090511	0.00292401	0.0126333	1.47612	1.32178	2.782	2.49974
b3599	mtlA	chr	+	3770303	3772217	-0.0450571	0.0295592	-0.624856	-1.64437	-1.74883	-1.99927	-0.462648	-1.02733	-0.41381	-0.276761	-1.75981	-0.662448	0.00663339	0.0203177	0.0131163	0.0322145	1.48305	1.09736	2.79539	2.13963
b3885	yihX	chr	+	4073575	4074175	-0.261674	-0.0750046	0.182037	-1.67769	-1.35607	-1.59275	-0.485487	-0.150805	0.420412	-0.0332067	-1.52171	-0.281017	0.00107085	0.0066242	0.0207769	0.0438198	1.48851	1.2407	2.80599	2.36313
b2096	gatY	chr	-	2174371	2175226	0.518199	0.462963	0.552363	-0.986011	-0.968628	-1.02521	0.928892	0.923903	0.728739	0.50818	-0.986247	0.898773	5.74549e-06	0.000611074	0.000685897	0.00506721	1.49443	1.88502	2.81752	3.69358
b0146	sfsA	chr	-	160781	161486	-1.67305	-1.40764	-1.76926	-2.96192	-3.36747	-2.84198	-2.08889	-2.30367	-2.29187	-1.63883	-3.13765	-2.17718	0.00276424	0.0117598	0.0213546	0.0447174	1.49881	0.960473	2.8261	1.94595
b0963	mgsA	chr	-	1025779	1026238	-0.688333	-0.265647	-0.369981	-1.97903	-1.90705	-1.86319	0.0778934	0.303105	0.152723	-0.422282	-1.92804	0.174535	0.00482772	0.0165455	0.000104515	0.00185266	1.50576	2.10258	2.83974	4.29476
b0240	crl	chr	+	257828	258230	-0.707048	-0.459683	-0.412473	-2.08603	-1.93622	-1.98543	0.0982529	-0.223205	0.0913814	-0.501708	-2.00914	-0.00360622	0.0008663	0.00594287	0.000802501	0.00560997	1.50743	2.00553	2.84303	4.01537
b3655	yicH	chr	+	3828479	3830189	-1.57627	-1.23533	-1.01034	-2.83332	-2.67435	-2.90897	-1.5225	-1.68558	-1.74287	-1.25652	-2.76778	-1.56078	0.00501667	0.0169384	0.000272235	0.00320008	1.51126	1.207	2.85058	2.30856
b4217	ytfK	chr	+	4437609	4437816	-1.64984	-1.54684	-1.57641	-3.11803	-3.16423	-2.84428	-0.964675	-0.978228	-0.602516	-1.58498	-3.09638	-0.936471	0.00250149	0.0111481	0.000203877	0.00275975	1.5114	2.15991	2.85087	4.46887
b4142	groS	chr	+	4368710	4369004	0.883602	0.732227	0.730117	-0.748918	-0.707879	-0.859952	1.73843	1.89225	1.72752	0.766847	-0.748564	1.77985	2.42391e-05	0.00133339	4.24546e-06	0.000421433	1.51541	2.52842	2.8588	5.76939
b0651	rihA	chr	-	682699	683635	1.17678	1.25556	1.17832	-0.322752	-0.285048	-0.470993	1.38459	1.40304	2.35054	1.20479	-0.334868	1.51119	0.00022049	0.00345589	0.0201998	0.0429678	1.53966	1.84606	2.90726	3.59517
b2240	glpT	chr	-	2349037	2350396	1.0297	1.11047	1.13584	-0.468438	-0.468228	-0.421795	0.963783	1.04223	0.889099	1.0998	-0.461536	0.981329	3.67558e-05	0.00152026	0.000296083	0.00329006	1.56134	1.44287	2.95127	2.7186
b0723	sdhA	chr	+	755129	756896	-0.776941	-0.814939	-0.860482	-2.45332	-2.36533	-2.47061	1.33768	1.397	1.09315	-0.821374	-2.41535	1.31739	5.44358e-06	0.000611074	0.000173149	0.00250309	1.59398	3.73274	3.01881	13.2944
b0435	bolA	chr	+	453695	454013	-1.17709	-1.59385	-1.21494	-2.95707	-3.00098	-2.90857	-1.13548	-0.98487	-0.913363	-1.33976	-2.96689	-1.0136	0.00514331	0.0171477	0.000250247	0.00307467	1.62713	1.95329	3.08898	3.87257
b4014	aceB	chr	+	4213500	4215102	0.04168	-0.448485	-0.399294	-1.88601	-2.02963	-1.8326	0.961931	0.696278	0.332937	-0.313834	-1.94738	0.751751	0.00417656	0.015057	0.00250458	0.0117928	1.63355	2.69913	3.10275	6.49411
b3708	tnaA	chr	+	3886752	3888168	-0.374327	-0.365508	-0.34251	-1.95045	-2.02621	-2.01841	2.86591	2.68962	2.6627	-0.359557	-1.99885	2.77351	3.15504e-05	0.00144605	2.91074e-05	0.0010571	1.63929	4.77236	3.11512	27.3289
b3430	glgC	chr	-	3566055	3567351	0.442141	0.267409	0.405672	-1.14128	-1.38641	-1.28833	0.579759	0.879208	0.749196	0.372846	-1.2871	0.717093	8.78398e-05	0.00221684	7.4622e-05	0.00158732	1.65995	2.0042	3.16005	4.01165
b2259	pmrD	chr	-	2371293	2371560	-2.54776	-2.47912	-2.05716	-4.04959	-4.02704	-3.94479	-2.86975	-2.60343	-2.54007	-2.34833	-4.02075	-2.80186	0.00668566	0.0203177	0.00302366	0.0128729	1.67242	1.21889	3.18748	2.32768
b0453	ybaY	chr	+	474602	475175	0.715257	0.703146	0.66918	-1.06306	-0.89545	-1.07996	2.42214	2.21801	2.61671	0.698691	-0.982186	2.39963	0.000699638	0.00546564	0.000123089	0.00208272	1.68088	3.38182	3.20623	10.4239
b4322	uxuA	chr	+	4549658	4550843	1.52205	1.36867	1.65123	-0.425438	-0.0425272	0.00274646	1.96979	1.84426	1.64774	1.50389	-0.187231	1.87422	0.00122256	0.0072238	0.000535142	0.0045769	1.69112	2.06145	3.22907	4.17405
b4529	ydbJ	chr	+	1439081	1439348	0.335373	1.08534	0.00158806	-1.42864	-1.06304	-1.64933	-0.140444	0.0890494	-0.553213	0.390759	-1.31069	-0.14218	0.0139209	0.033653	0.00993986	0.0269412	1.70145	1.16851	3.25227	2.24779
b0030	rihC	chr	+	27292	28207	1.91013	1.90426	1.74166	0.153848	0.12642	0.0712874	2.18805	2.1752	2.26974	1.83679	0.11632	2.1904	0.000173292	0.00313669	1.03177e-06	0.000228871	1.72047	2.07408	3.29544	4.21075
b0391	yaiE	chr	+	407400	407685	-0.130061	-0.147429	0.0702862	-1.77061	-1.79047	-1.90611	-0.221882	0.197737	-0.450335	-0.0754958	-1.80639	-0.135579	0.000118847	0.00256958	0.00996952	0.0269412	1.73089	1.67081	3.31932	3.18392
b3774	ilvC	chr	+	3955992	3957468	0.524763	0.518064	0.0183569	-1.33427	-1.58766	-1.25447	-0.519828	-0.43277	-0.491812	0.308868	-1.43985	-0.490377	0.00208857	0.00996759	0.00860403	0.0244492	1.74872	0.949475	3.3606	1.93117
b0882	clpA	chr	+	922486	924763	-0.72085	-0.517017	-0.367581	-2.39399	-2.13473	-2.34996	-0.698444	-0.80306	-0.807314	-0.521858	-2.27427	-0.761761	0.000243397	0.00364286	0.000666923	0.00506721	1.75241	1.51251	3.36921	2.85306
b4151	frdD	chr	-	4377029	4377389	-0.18999	0.0654175	-0.028226	-1.93673	-1.71496	-1.75748	-0.271969	0.346806	-0.362529	-0.040834	-1.80766	-0.0828586	6.86585e-05	0.00196091	0.0111632	0.0291613	1.76682	1.7248	3.40304	3.30534
b4089	rpiR	chr	-	4310123	4311014	-0.553475	-0.428889	-0.56495	-2.33719	-2.12709	-2.55311	-1.30751	-0.694259	-1.01069	-0.527335	-2.30259	-1.11537	0.00196748	0.00952908	0.00501334	0.0172618	1.77525	1.18722	3.42298	2.27713
b1332	ynaJ	chr	+	1395388	1395646	-0.775152	-0.854928	-0.546898	-2.3976	-2.55666	-2.54682	-0.122989	-0.221194	0.397801	-0.71789	-2.50266	-0.114778	0.000356205	0.00423267	0.00363899	0.0145267	1.78477	2.38788	3.44563	5.23389
b1067	yceH	chr	+	1125379	1126027	1.5883	1.39053	2.28369	-0.130158	-0.0685423	0.069488	1.05604	0.639742	1.01069	1.74063	-0.068459	0.892694	0.0182098	0.0405298	0.00923213	0.0256245	1.80909	0.961153	3.50421	1.94686
b3962	sthA	chr	-	4157412	4158813	-0.71305	-0.863973	-0.739572	-2.70423	-2.58037	-2.58049	0.567969	0.380682	0.400579	-0.771363	-2.61483	0.487383	8.6688e-06	0.000717102	5.93274e-06	0.000502826	1.84346	3.10221	3.5887	8.58733
b3766	ilvL	chr	+	3948344	3948443	-5.91101	-6.04875	-6.03338	-8.00435	-7.78424	-7.65964	-5.49135	-5.61278	-5.81643	-5.99179	-7.83864	-5.62585	0.000819811	0.00589309	9.79612e-05	0.00185266	1.84685	2.21279	3.59715	4.63571
b0722	sdhD	chr	+	754782	755130	0.239242	0.322725	0.3394	-1.6789	-1.29075	-2.07325	1.06497	1.2247	1.08529	0.302818	-1.57187	1.12247	0.0115827	0.0296843	0.00470058	0.0168654	1.87469	2.69434	3.66722	6.47258
b2833	ygdR	chr	+	2969292	2969511	-1.20073	-1.5576	-1.56171	-3.4523	-3.28933	-3.22612	-1.97176	-1.85006	-1.7591	-1.45749	-3.34498	-1.90158	0.000647166	0.00531671	9.37645e-05	0.00183704	1.88749	1.4434	3.69991	2.7196
b3752	rbsK	chr	+	3935316	3936246	0.278864	1.23885	1.37191	-0.739843	-0.883934	-1.33813	0.3175	0.409008	1.1675	0.96747	-0.941374	0.46098	0.0149976	0.0356733	0.010652	0.0282724	1.90884	1.40235	3.75508	2.64333
b0163	yaeH	chr	-	183708	184095	0.724529	0.869471	0.732626	-1.13409	-1.31727	-0.676811	0.275837	0.286726	0.76485	0.773834	-1.14315	0.330766	0.00783936	0.0228189	0.00435229	0.0163238	1.91698	1.47392	3.77633	2.77775
b2175	spr	chr	+	2268000	2268567	-0.73901	-0.636429	-0.723792	-2.73745	-2.66428	-2.62016	-1.95715	-1.99458	-1.61976	-0.698761	-2.68267	-1.91894	1.98403e-06	0.000611074	0.0149399	0.0351705	1.98391	0.763732	3.95564	1.69788
b4153	frdB	chr	-	4377805	4378540	0.444829	0.831856	0.648141	-1.43142	-1.21584	-1.40491	0.607732	0.711478	0.532262	0.657957	-1.32893	0.634346	0.000359178	0.00423267	3.58683e-05	0.00113634	1.98689	1.96328	3.96381	3.89947
b3927	glpF	chr	-	4115267	4116113	1.76476	1.57051	1.78792	-0.363948	-0.286842	-0.291636	1.23648	1.04566	1.15372	1.70186	-0.324611	1.16439	0.000345828	0.00423267	0.000258767	0.00313255	2.02647	1.489	4.07407	2.80695
b3001	yghZ	chr	+	3145918	3146959	0.235586	1.05371	1.00102	-1.22313	-1.4173	-0.82191	1.00618	0.594299	1.70048	0.784114	-1.24547	0.901005	0.00588047	0.0186696	0.00801159	0.0234507	2.02958	2.14647	4.08286	4.42743
b0080	fruR	chr	+	88027	89032	-0.344488	-0.243435	-0.272324	-2.42343	-2.36855	-2.1538	-1.24072	-1.31719	-1.33886	-0.300708	-2.34808	-1.31354	0.000524019	0.00513332	0.00299733	0.0128618	2.04737	1.03454	4.13352	2.04846
b3934	cytR	chr	-	4121453	4122479	-0.0921639	-0.222539	-0.0671716	-2.33963	-2.17691	-2.02237	-0.86178	-0.558197	-0.823434	-0.134982	-2.21196	-0.757607	0.000264541	0.00371605	0.000417095	0.00395576	2.07697	1.45435	4.21922	2.74033
b0679	nagE	chr	+	703166	705113	0.0229179	0.237529	0.348246	-1.86804	-1.84617	-1.87831	0.334523	0.268821	-0.0266317	0.219647	-1.85984	0.251416	0.0019536	0.00952908	0.00273893	0.012296	2.07949	2.11126	4.22657	4.32067
b2899	yqfA	chr	-	3040510	3041170	-0.131866	-0.69854	-0.859795	-2.73162	-2.66712	-2.76584	-1.49689	-1.47391	-1.45368	-0.614963	-2.70376	-1.48278	0.00936708	0.0258289	7.80797e-05	0.00162866	2.08879	1.22098	4.25392	2.33105
b1824	yobF	chr	-	1905471	1905615	-4.61479	-4.71613	-4.63827	-6.75526	-6.88698	-6.64238	-5.25079	-5.17251	-4.79824	-4.67261	-6.79923	-5.20638	0.000209623	0.00338454	0.00180656	0.00992609	2.12662	1.59285	4.36693	3.01645
b1190	dadX	chr	+	1238101	1239172	-2.68774	-2.64679	-2.45719	-4.72308	-4.71574	-4.82172	-0.0536777	-0.168239	-0.799046	-2.60697	-4.73555	-0.24237	0.000143574	0.00277639	0.00230232	0.0113879	2.12858	4.49318	4.37286	22.5206
b1138	ymfE	chr	-	1196755	1197460	0.212165	0.449169	0.340452	-1.75151	-1.7917	-2.03928	-0.243537	-0.237401	0.263075	0.345033	-1.84291	-0.184136	6.89088e-05	0.00196091	0.00235446	0.0114568	2.18794	1.65877	4.55656	3.15748
b1189	dadA	chr	+	1236793	1238092	-0.92247	-1.11935	-1.41852	-3.3728	-3.40365	-3.45468	0.626536	0.965846	0.841704	-1.20631	-3.40631	0.769178	0.00332129	0.0132241	0.00028875	0.00324765	2.19999	4.17548	4.59477	18.0695
b0655	gltI	chr	-	686061	686970	0.401304	1.27398	0.840946	-1.46642	-1.39621	-1.04894	0.318004	-0.192658	0.0856168	0.842778	-1.38226	0.0868132	0.00488231	0.0166356	0.00233042	0.0114148	2.22504	1.46907	4.67523	2.76844
b4152	frdC	chr	-	4377399	4377795	1.50098	0.914925	0.801887	-1.22025	-1.28648	-1.22483	1.46464	1.01414	0.489503	0.996076	-1.26149	1.12014	0.00815469	0.0233064	0.015128	0.0354028	2.25757	2.38164	4.78185	5.21128
b4411	ecnB	chr	+	4374575	4374722	-3.61694	-3.52101	-3.81029	-5.90354	-5.96809	-5.84076	-4.0317	-3.53018	-3.77011	-3.64327	-5.93006	-3.8202	0.000289991	0.00394941	0.00295401	0.0127125	2.28679	2.10986	4.87968	4.31649
b1256	ompW	chr	+	1312043	1312682	2.36024	2.38698	1.83931	-0.165485	-0.170842	-0.059206	1.2736	0.955865	1.70528	2.14808	-0.145325	1.18736	0.00443205	0.0157502	0.0195575	0.0421863	2.29341	1.33268	4.90213	2.5187
b0382	iraP	chr	+	400609	400870	-0.515307	-0.708114	-1.15638	-3.19789	-3.12938	-3.16029	-1.03264	-1.3314	-1.08088	-0.836566	-3.15647	-1.17197	0.00592907	0.0187042	0.00142656	0.00829745	2.3199	1.9845	4.99297	3.95724
b4310	yjhT	chr	-	4535681	4536788	-0.489876	-0.331956	-0.82362	-2.96866	-2.92615	-2.87674	2.24117	2.60424	4.01994	-0.617774	-2.94518	2.55799	0.00288122	0.0121019	0.00829238	0.0237907	2.32741	5.50317	5.01904	45.3544
b3832	rmuC	chr	+	4015355	4016783	-0.631941	-0.460561	-1.30722	-3.44149	-3.04599	-3.12208	-2.1792	-2.38044	-2.09949	-0.854732	-3.2152	-2.20305	0.00431625	0.0154122	0.00394101	0.0153617	2.36047	1.01215	5.13537	2.01691
b3685	yidE	chr	-	3862634	3864296	-0.58327	-0.592052	-0.58546	-2.75086	-3.0543	-3.27082	-1.88586	-2.11515	-2.25776	-0.581354	-2.98329	-2.04368	0.00379383	0.0140873	0.009268	0.0256245	2.40194	0.939613	5.28512	1.91801
b4154	frdA	chr	-	4378532	4380341	1.04697	1.03825	0.963894	-1.3679	-1.37301	-1.54631	0.192086	0.111363	-0.0873863	1.00847	-1.40937	0.109219	7.39516e-05	0.00196091	0.000238433	0.00304832	2.41783	1.51858	5.34368	2.8651
b2150	mglB	chr	-	2237371	2238370	-0.190454	-0.269613	-0.245901	-2.70847	-2.70595	-2.6286	3.34426	3.28457	3.32323	-0.240727	-2.69502	3.32291	2.98836e-07	0.000444967	3.98449e-08	1.97764e-05	2.4543	6.01793	5.48045	64.8005
b3748	rbsD	chr	+	3931373	3931793	-4.84494	-4.73103	-4.54594	-7.2311	-7.25302	-7.13113	-5.99332	-6.18513	-6.04012	-4.70021	-7.2292	-6.10076	0.000236678	0.00363313	0.000218808	0.00290897	2.52899	1.12844	5.77168	2.18622
b3496	yhiP	chr	+	3638884	3640354	1.10355	0.541243	0.778861	-1.72748	-1.79422	-1.76882	-0.226838	-0.201996	-0.173897	0.770528	-1.77077	-0.229966	0.00359386	0.0138994	7.20017e-07	0.000228871	2.5413	1.5408	5.82112	2.90956
b1594	dgsA	chr	-	1665367	1666588	-1.20701	-0.520254	-0.960269	-3.71994	-3.3173	-3.85286	-2.15663	-1.45423	-2.19413	-0.920984	-3.56058	-1.89931	0.000565014	0.00524536	0.00642046	0.0202974	2.63959	1.66127	6.23156	3.16295
b4240	treB	chr	-	4462781	4464203	0.806041	0.830999	0.824183	-1.86495	-1.83513	-1.80178	0.0869051	0.144985	-0.0102653	0.821041	-1.84226	0.0926682	3.7234e-06	0.000611074	0.000103066	0.00185266	2.6633	1.93493	6.3348	3.82358
b3093	exuT	chr	+	3243125	3244544	0.0366267	-0.518577	-1.27054	-3.71712	-3.36459	-2.80545	-1.52458	-1.36026	-1.21879	-0.711558	-3.38452	-1.46548	0.00592092	0.0187042	0.0118151	0.0301374	2.67297	1.91905	6.37739	3.78173
b3688	yidQ	chr	+	3865750	3866083	-0.103171	0.0919652	-0.155786	-2.67252	-2.76763	-2.92566	-1.76613	-1.3257	-1.80938	-0.0529961	-2.75572	-1.57548	1.32397e-05	0.000870237	0.00766773	0.0227435	2.70273	1.18024	6.51032	2.26615
b4033	malF	chr	-	4241553	4243098	-0.208026	0.363439	-0.060477	-2.85398	-2.70242	-2.69513	1.69936	2.3549	2.43695	0.00889913	-2.76405	1.99824	0.00196006	0.00952908	0.00148847	0.00859042	2.77294	4.76228	6.83501	27.1387
b1015	putP	chr	+	1078527	1080036	-1.11411	-1.02538	-0.47317	-3.66818	-3.59565	-3.83014	-0.367964	-0.00858252	-0.333062	-0.854343	-3.66031	-0.179663	0.00230574	0.0106955	6.40818e-05	0.00151739	2.80596	3.48064	6.99325	11.1629
b1976	mtfA	chr	+	2041674	2042472	1.02861	1.73296	1.32089	-1.52204	-1.58669	-1.03883	-0.227596	0.847337	0.613722	1.35491	-1.46497	0.214402	0.000585619	0.00524536	0.0161679	0.03698	2.81988	1.67937	7.06103	3.20289
b2964	nupG	chr	+	3103735	3104992	1.08869	0.976438	0.763219	-2.07036	-1.92357	-1.58679	0.689764	0.497489	0.769719	0.913443	-1.91975	0.642006	0.000205602	0.00338454	0.000457591	0.00425846	2.83319	2.56175	7.12648	5.90424
b4208	cycA	chr	+	4427886	4429299	-2.37672	-1.99674	-1.71236	-4.56581	-5.01731	-4.92351	-3.23456	-2.97379	-2.65531	-2.01726	-4.8514	-3.00302	0.000499361	0.00504647	0.00114425	0.00704043	2.83415	1.84838	7.1312	3.60097
b0828	iaaA	chr	+	865790	866756	-0.707589	0.455428	-0.304278	-2.87129	-3.06752	-3.34323	-1.4384	-0.599446	-1.70332	-0.187277	-3.06661	-1.24596	0.00665441	0.0203177	0.0191343	0.0419601	2.87934	1.82065	7.35812	3.53241
b4139	aspA	chr	-	4364913	4366350	0.900161	0.709873	0.840043	-2.10979	-2.15745	-1.87888	-0.385175	-0.468398	-0.232362	0.811655	-2.09346	-0.39532	3.52657e-05	0.0015003	0.000143687	0.0022521	2.90511	1.69814	7.49076	3.24482
b2568	lepB	chr	-	2702356	2703331	-1.02765	-0.780201	-1.18795	-3.97642	-3.97346	-3.6399	-2.12258	-2.04759	-2.26998	-1.01705	-3.9229	-2.14572	6.30277e-05	0.00195517	0.000635733	0.00498214	2.90586	1.77719	7.49463	3.42757
b2426	ucpA	chr	-	2541853	2542645	0.252086	0.126616	0.291282	-2.77254	-2.68761	-2.57951	-0.0529438	-0.178539	-0.541049	0.217146	-2.6937	-0.187939	3.01674e-06	0.000611074	0.00131979	0.00789223	2.91085	2.50576	7.52061	5.6795
b2535	csiE	chr	+	2663456	2664737	-0.623727	-0.232823	0.077093	-3.09705	-3.29117	-2.90649	-0.456683	-1.06748	-0.710452	-0.238624	-3.15403	-0.759564	0.000989711	0.00629778	0.000875121	0.00597732	2.91541	2.39447	7.54441	5.25783
b2149	mglA	chr	-	2235790	2237311	-1.75992	-1.18524	-1.5383	-4.33384	-4.61185	-4.33522	2.05689	1.4322	2.1642	-1.49792	-4.46675	1.82381	0.000486561	0.00499648	0.000307205	0.00330358	2.96883	6.29056	7.82902	78.2793
b4055	aphA	chr	+	4267436	4268150	0.735277	1.0447	1.01469	-2.02946	-2.09327	-1.86261	1.14947	0.885593	1.18733	0.952863	-2.03032	1.04932	4.20007e-05	0.00160357	2.76429e-05	0.00102901	2.98318	3.07964	7.90727	8.45403
b1621	malX	chr	+	1697378	1698971	1.68433	1.29542	0.972662	-1.8246	-1.5193	-2.04526	0.228634	-0.004599	-0.535168	1.23825	-1.7521	0.00113056	0.000414163	0.00456942	0.00522897	0.017705	2.99035	1.75323	7.94666	3.37112
b3672	ivbL	chr	-	3850912	3851011	-3.63005	-3.52931	-3.52739	-6.81889	-6.47904	-6.55029	-4.52256	-4.75915	-4.98455	-3.56415	-6.61466	-4.70715	0.000417355	0.00456942	0.000528783	0.0045769	3.0505	1.90751	8.28501	3.7516
b3224	nanT	chr	-	3369105	3370596	-1.37708	-0.956904	-1.08637	-4.05376	-4.25835	-4.32579	0.857082	0.683553	0.870487	-1.12511	-4.20029	0.803115	9.53798e-05	0.00229328	2.52883e-06	0.000299317	3.07517	5.0034	8.4279	32.0755
b0721	sdhC	chr	+	754399	754789	1.76364	1.43894	2.41176	-1.17218	-1.23728	-1.476	1.20217	1.50627	1.33655	1.85008	-1.24677	1.32391	0.00448628	0.0158366	3.2621e-05	0.0011296	3.09686	2.57069	8.55554	5.94093
b3995	rsd	chr	-	4194354	4194831	-2.1333	-1.60571	-1.90012	-5.20368	-4.95426	-4.76084	-3.08023	-3.03685	-2.40935	-1.86039	-4.99887	-2.97864	0.000122361	0.00256958	0.00255404	0.0118863	3.13848	2.02023	8.80595	4.05649
b2799	fucO	chr	-	2929886	2931038	0.288166	0.498496	0.645026	-3.0353	-2.59721	-1.94479	0.241174	0.0727015	0.609726	0.488401	-2.65525	0.250891	0.00640827	0.0198377	0.00437274	0.0163403	3.14365	2.90614	8.83758	7.49611
b0791	ybhQ	chr	+	823852	824263	-0.906703	-0.985824	-0.774723	-3.8934	-4.22996	-3.85415	-2.84003	-3.11641	-2.35796	-0.883842	-4.04778	-2.89142	0.000179059	0.00313669	0.0158545	0.0365943	3.16393	1.15635	8.9627	2.22894
b3128	garD	chr	+	3273303	3274875	1.62159	0.498496	1.82466	-1.99723	-2.06764	-2.03042	0.646598	0.878314	0.33913	1.18057	-2.04705	0.684978	0.0146724	0.0350678	0.00302588	0.0128729	3.22762	2.73203	9.3672	6.64388
b2414	cysK	chr	+	2530430	2531402	2.5792	2.43167	2.76521	-0.601055	-0.683913	-0.604006	1.02622	0.922357	0.689518	2.59048	-0.643118	0.919284	0.000404566	0.00456362	0.00257588	0.0118863	3.2336	1.5624	9.40612	2.95345
b0162	cdaR	chr	+	182462	183620	-0.5248	-0.180384	-0.321251	-3.94724	-3.49065	-3.42694	-1.48625	-1.66959	-0.847956	-0.342346	-3.65167	-1.51975	0.000242765	0.00364286	0.00274014	0.012296	3.30932	2.13192	9.91298	4.38299
b0064	araC	chr	+	70386	71265	1.17837	0.986473	0.842078	-2.63147	-2.17956	-2.19953	0.0173705	0.113673	-0.715708	0.966021	-2.36449	-0.101159	0.00012766	0.00257134	0.00481843	0.017046	3.33051	2.26333	10.0596	4.80097
b1376	uspF	chr	-	1433208	1433643	1.19214	0.546917	1.14271	-2.45389	-2.47647	-2.08275	-0.604246	-0.402189	-0.0581107	0.927921	-2.40298	-0.456034	0.0005034	0.00504647	0.000789998	0.00554862	3.3309	1.94695	10.0624	3.85558
b4035	malK	chr	+	4244806	4245922	-0.349345	-0.421285	-0.388242	-3.60764	-3.88566	-3.68495	1.79899	1.8355	2.11022	-0.385403	-3.75531	1.8484	0.000309813	0.00401442	2.17234e-06	0.000299317	3.3699	5.60371	10.3381	48.6278
b2584	yfiQ	chr	+	2717974	2720635	-0.945537	-0.885404	-1.06169	-4.32633	-4.30783	-4.5604	-3.30536	-3.45647	-3.49181	-0.960546	-4.33105	-3.39225	1.73309e-05	0.00103223	0.000997646	0.00643071	3.37051	0.938809	10.3425	1.91694
b1799	yeaT	chr	-	1878909	1879833	-0.0214762	-0.781611	-0.0956916	-3.52448	-3.88432	-3.98375	-2.3786	-2.30779	-2.16988	-0.359391	-3.76966	-2.33064	0.000797759	0.0058353	0.00314412	0.0132248	3.41027	1.43902	10.6315	2.71137
b4321	gntP	chr	-	4547975	4549319	0.908332	1.85319	0.677118	-2.22662	-2.31135	-2.84963	-0.481697	-0.33789	-0.590945	1.08178	-2.35405	-0.429288	0.00276132	0.0117598	0.00458268	0.0167246	3.43583	1.92476	10.8215	3.79674
b2805	fucR	chr	+	2937389	2938121	0.737066	0.28656	0.898662	-2.73022	-3.15966	-2.30984	-1.05211	-0.697293	0.103135	0.608016	-2.86202	-0.730496	0.000579892	0.00524536	0.00850499	0.024214	3.47004	2.13153	11.0812	4.38181
b2181	yejG	chr	-	2275914	2276259	0.481721	-0.255066	-0.44464	-3.58784	-3.65197	-3.64933	-2.26556	-2.37149	-2.74458	-0.143927	-3.6193	-2.45935	0.00602933	0.0189004	0.0136658	0.0330331	3.47537	1.15995	11.1222	2.23449
b1725	yniA	chr	+	1805819	1806680	-0.391873	0.832916	-0.55175	-3.65123	-3.73058	-3.47245	-0.884134	-1.58677	-1.69663	-0.169419	-3.66237	-1.31006	0.012607	0.0316505	0.00830961	0.0237942	3.49295	2.35231	11.2586	5.10641
b1415	aldA	chr	+	1486255	1487695	-0.407653	-0.339536	-0.410943	-3.80912	-4.00264	-3.81066	1.52888	1.5689	1.23034	-0.374762	-3.90137	1.49926	7.34435e-05	0.00196091	1.28916e-05	0.000639852	3.5266	5.40062	11.5243	42.2425
b3709	tnaB	chr	+	3888258	3889506	-3.10112	-2.8476	-3.02453	-6.93846	-6.43453	-6.33214	-0.09527	-0.188012	0.0106883	-3.00383	-6.56536	-0.0796116	0.000832221	0.00589771	0.000323736	0.00337444	3.56153	6.48575	11.8067	89.62
b3418	malT	chr	+	3551106	3553812	-0.464339	-0.21003	-0.449053	-4.24868	-4.16007	-4.01382	-2.34181	-2.2773	-2.45579	-0.376265	-4.1702	-2.33105	5.37375e-06	0.000611074	5.40293e-05	0.00142876	3.79394	1.83915	13.8704	3.57799
b3707	tnaC	chr	+	3886457	3886532	0.869367	0.680134	0.730972	-3.08698	-3.24871	-2.70582	1.59917	1.64505	1.80706	0.751038	-3.09825	1.627	0.000641545	0.00531671	0.000290085	0.00324765	3.84929	4.72524	14.4129	26.4509
b3544	dppA	chr	-	3704120	3705728	-1.08907	-1.28231	-1.14799	-4.87207	-5.23109	-4.849	-1.72845	-2.20825	-1.24388	-1.16594	-5.04547	-1.86715	0.000156848	0.00299419	0.00251063	0.0117928	3.87953	3.17832	14.7182	9.05251
b0880	cspD	chr	-	921588	921813	0.462749	0.864559	0.854752	-3.27836	-3.26546	-2.72876	-0.51613	-0.421658	-0.712702	0.743071	-3.17247	-0.51802	0.00012779	0.00257134	0.00134917	0.00794039	3.91554	2.65445	15.0902	6.29607
b3528	dctA	chr	-	3680183	3681470	-0.307857	-0.319718	-0.466018	-4.43661	-4.35191	-4.35962	-0.895691	-1.01826	-1.07677	-0.36959	-4.38242	-0.978031	5.54913e-06	0.000611074	1.36003e-05	0.000642389	4.01283	3.40439	16.143	10.5883
b2597	raiA	chr	+	2735175	2735517	-0.110051	0.0560617	0.0017466	-4.2586	-4.15974	-4.00099	-0.0211253	-0.0942558	-0.0222319	-0.00681773	-4.17033	-0.0451809	6.37493e-06	0.000632818	9.79109e-05	0.00185266	4.16351	4.12515	17.9202	17.4499
b0598	cstA	chr	+	629116	631222	-0.971605	-0.69652	-1.41577	-5.30084	-5.40792	-5.09936	-2.26967	-1.86196	-2.09326	-1.08778	-5.32656	-2.1046	0.000603184	0.00525229	4.62643e-05	0.00132476	4.23877	3.22196	18.8798	9.33054
b2844	yqeF	chr	-	2982432	2983614	0.0389259	-0.288483	-0.563804	-4.91742	-4.57916	-4.03561	-2.14333	-2.04553	-3.04335	-0.333861	-4.59299	-2.30025	0.000356824	0.00423267	0.00760975	0.0226166	4.25913	2.29274	19.1481	4.89987
b1205	ychH	chr	+	1258013	1258292	0.884485	1.44408	1.96569	-2.78078	-3.12452	-2.71644	-0.294797	-0.322075	-0.178654	1.44057	-2.94167	-0.27261	0.00189721	0.00932326	0.00090396	0.00608464	4.38225	2.66906	20.8539	6.36015
b2365	dsdX	chr	+	2475868	2477206	-0.685232	0.0938434	-1.20222	-5.09739	-5.27697	-6.03399	0.889014	1.84268	1.91758	-0.722396	-5.30736	1.29473	0.000708979	0.00546564	0.000101617	0.00185266	4.58496	6.60209	24	97.1464
b3603	lldP	chr	+	3775421	3777077	-1.42221	-1.37823	-1.61433	-6.10515	-6.15057	-6.04094	-0.0989136	-0.274187	-0.672869	-1.48525	-6.12027	-0.27227	2.50738e-05	0.00133339	0.000606354	0.00480624	4.63501	5.848	24.8472	57.6
b2869	ygeV	chr	-	3002029	3003808	-0.78402	-0.518577	0.315543	-5.90977	-4.98356	-5.23429	-3.18509	-2.77013	-2.49181	-0.32879	-5.24379	-2.92161	0.000363856	0.00423267	0.00241812	0.0116405	4.915	2.32218	30.1691	5.00088
b2151	galS	chr	-	2238649	2239690	0.20255	0.533794	0.320213	-5.37515	-5.00709	-5.03837	-0.965789	-1.56189	-1.66584	0.360509	-5.15389	-1.31521	5.0924e-06	0.000611074	0.000550212	0.0045769	5.5144	3.83868	45.7087	14.3073
b3118	tdcA	chr	-	3264148	3265087	2.3966	2.72089	2.86958	-4.3837	-4.53594	-3.51927	-2.03155	-2.06386	-2.25235	2.68446	-4.28732	-2.08029	0.000485335	0.00499648	0.0195774	0.0421863	6.97178	2.20703	125.52	4.61723
b4188	yjfN	chr	-	4414039	4414315	1.18445	3.84149	3.69791	-4.41673	-4.47775	-4.27736	-2.04165	-2.19315	-2.87032	2.57296	-4.42553	-2.25615	0.0133661	0.0326801	0.0120959	0.0304225	6.99849	2.16938	127.866	4.4983
Below are Significant in WT/M, but not C/M
b2517	yfgB	chr	-	2641150	2642305	-0.0540436	-0.139767	-0.06986	0.85727	0.895754	0.692227	-0.366372	0.224705	-0.263576	-0.090658	0.851504	-0.169888	0.0015594	0.00832237	0.025042	0.0501176	-0.942162	-1.02139	0.520452	0.492641
b0051	ksgA	chr	-	51608	52430	-0.549421	-0.571133	-0.593048	0.369091	0.0631999	0.106927	-0.2466	-0.764468	-0.704412	-0.576429	0.173018	-0.503518	0.014558	0.0349627	0.0250392	0.0501176	-0.749447	-0.676536	0.594831	0.625666
b3749	rbsA	chr	+	3931800	3933306	0.152635	-0.103902	-0.199576	-3.45829	-3.43439	-3.02484	-2.42672	-2.87913	-2.58492	-0.0778891	-3.38497	-2.62276	8.67927e-05	0.00221684	0.0251453	0.0502568	3.30708	0.762208	9.89761	1.69608
b0185	accA	chr	+	208620	209580	0.166004	0.250206	0.21619	0.764146	0.904317	1.07717	0.397949	0.404842	0.473111	0.216107	0.885997	0.430919	0.0116685	0.0298018	0.0260639	0.0514878	-0.669891	-0.455078	0.628554	0.729471
b1253	yciA	chr	-	1309871	1310270	-3.48179	-3.29443	-3.26108	-2.21744	-2.1218	-2.2534	-2.42942	-2.43799	-2.43365	-3.33583	-2.18812	-2.43652	0.000515713	0.00508541	0.0261639	0.0516001	-1.14771	-0.248405	0.451342	0.841827
b2174	yeiU	chr	+	2266875	2267589	-0.27421	-0.121775	-0.0663014	1.31048	1.12415	0.968422	-0.926426	-0.840884	0.0851131	-0.137412	1.14878	-0.778833	0.000927002	0.00606649	0.0263273	0.0517937	-1.28619	-1.92761	0.410033	0.262865
b3287	def	chr	+	3431711	3432221	-2.15701	-2.19344	-2.12236	-1.23201	-1.12027	-1.17726	-2.14609	-2.29467	-1.76113	-2.14815	-1.1706	-2.17305	5.27639e-05	0.0018271	0.0264674	0.0518702	-0.977549	-1.00245	0.507842	0.499151
b3560	glyQ	chr	-	3722429	3723341	0.822193	0.836976	0.938022	1.40288	1.65298	1.67765	1.12143	1.31501	1.01107	0.872088	1.55982	1.17447	0.00728608	0.0216546	0.026475	0.0518702	-0.687734	-0.385352	0.620828	0.765592
b2742	nlpD	chr	-	2865635	2866775	-0.957818	-1.12103	-0.93878	-2.17441	-2.21554	-2.24087	-1.48348	-1.42004	-1.78887	-1.00969	-2.20242	-1.5217	0.000935865	0.00606649	0.0268461	0.0524592	1.19273	0.680722	2.28585	1.60294
b1294	sapA	chr	-	1353490	1355134	-1.11369	-1.05867	-0.96087	-0.341839	-0.569144	-0.586594	-0.994629	-1.18077	-0.796004	-1.02883	-0.492843	-1.02707	0.00788294	0.0228805	0.0269564	0.0526056	-0.535986	-0.534227	0.689687	0.690529
b1329	mppA	chr	+	1391250	1392864	0.135656	0.333176	0.367049	-0.939255	-1.03876	-1.21439	-0.0888707	-0.615785	-0.116246	0.300942	-1.05504	-0.31247	0.000257979	0.00369356	0.0277595	0.0539608	1.35598	0.742568	2.55971	1.67315
b0458	ylaC	chr	-	478004	478475	-0.163125	-0.150305	-0.240688	0.184523	0.151211	0.35067	-0.0261293	-0.128735	0.0297251	-0.170508	0.198416	-0.0610722	0.0107686	0.0286329	0.0279684	0.0542251	-0.368924	-0.259488	0.77436	0.835384
b1702	pps	chr	-	1782757	1785136	0.207368	0.333815	0.00530575	-0.713318	-0.561966	-0.839807	-0.252728	-0.232502	-0.266846	0.159701	-0.663804	-0.251282	0.0023188	0.010705	0.0282884	0.0547031	0.823504	0.412521	1.7697	1.33101
b0553	nmpC	chr	-	573751	576048	2.1646	2.23591	2.25268	0.716253	0.749422	0.901685	1.63356	1.70999	2.31076	2.22421	0.763976	1.74301	0.000263047	0.00371605	0.0293136	0.056175	1.46024	0.979037	2.75153	1.97115
b3495	uspA	chr	+	3638133	3638568	1.49191	1.83108	2.04168	0.751323	0.889134	1.1195	1.27284	1.70712	1.76124	1.81169	0.874742	1.48544	0.0146494	0.0350678	0.0297663	0.0568961	0.93695	0.6107	1.91448	1.527
b0523	purE	chr	-	551813	552323	-0.12856	0.153143	-0.068378	1.79067	1.27594	1.99453	0.0943325	0.671451	-0.648538	-0.0207089	1.56657	0.122772	0.00795586	0.0229135	0.0302879	0.0577448	-1.58728	-1.4438	0.332799	0.367599
b1055	yceA	chr	+	1116029	1117082	0.236952	0.456548	0.411112	1.17549	1.74161	1.28016	0.649249	0.567849	0.462384	0.378468	1.41804	0.589112	0.0171342	0.0391902	0.0312123	0.0590535	-1.03957	-0.828926	0.486472	0.562948
b1867	yecD	chr	+	1948855	1949422	0.964141	0.628818	0.716401	-0.0684656	-0.0546224	-0.214927	0.863903	1.15239	0.491182	0.723097	-0.092937	0.877322	0.00446409	0.0158263	0.0313171	0.0591766	0.816034	0.970259	1.76056	1.95919
b3740	gidB	chr	-	3921079	3921703	-1.23701	-0.963294	-0.84546	0.293049	0.168184	0.466147	-1.14598	-1.39979	-0.479839	-0.995673	0.266544	-1.1813	0.0011333	0.00691591	0.0313589	0.0591805	-1.26222	-1.44785	0.416903	0.366568
b2832	ygdQ	chr	+	2968441	2969155	-2.48782	-2.02262	-2.20726	-1.49857	-1.5597	-1.35982	-2.39109	-2.40465	-1.90685	-2.24337	-1.49268	-2.44237	0.0173349	0.0393485	0.0315598	0.0593341	-0.750696	-0.949695	0.594317	0.517742
b2795	ygdH	chr	+	2924329	2925694	0.268169	0.623957	0.962792	-0.763969	-0.641031	-0.836832	0.683582	0.911484	0.053219	0.636533	-0.735908	0.640492	0.0152172	0.0360802	0.0319364	0.0598156	1.37244	1.3764	2.58908	2.5962
b3432	glgB	chr	-	3569338	3571525	-0.60397	-0.452253	-0.365679	-1.92792	-1.87902	-2.14369	-1.14187	-0.714923	-0.20641	-0.472733	-1.95394	-0.919056	0.000169971	0.00313669	0.0321572	0.0601533	1.48121	1.03489	2.79183	2.04895
b0881	clpS	chr	+	922135	922456	-2.4767	-2.25858	-2.52584	-4.07832	-3.85687	-3.72088	-3.37816	-3.43426	-3.33427	-2.42558	-3.91235	-3.44917	0.000506205	0.00504647	0.0326346	0.0607153	1.48677	0.463182	2.8026	1.37858
b0269	yagF	chr	+	282424	284392	-2.31468	-2.65392	-2.39153	-3.3404	-3.45235	-3.45043	-1.26634	-0.94522	-2.17462	-2.47964	-3.41213	-1.36717	0.00597574	0.0187719	0.0326615	0.0607153	0.932486	2.04495	1.90856	4.1266
b3180	yhbY	chr	+	3325811	3326105	-1.68478	-1.38995	-1.54676	-0.628422	-0.704615	-0.670564	-1.73953	-1.79782	-1.24284	-1.52901	-0.667204	-1.70051	0.0065043	0.0200386	0.0326415	0.0607153	-0.861804	-1.0333	0.550264	0.48859
b0766	ybhA	chr	-	796835	797654	0.85283	1.37104	0.816313	2.01162	3.04905	2.69859	0.968802	1.07159	0.950026	0.984654	2.53362	1.01367	0.0179756	0.0403097	0.0331489	0.0614679	-1.54897	-1.51995	0.341755	0.348697
b2241	glpA	chr	+	2350668	2352297	1.41251	1.29614	1.16097	-0.49811	-0.594827	-0.34795	-0.115651	-0.267837	-0.170598	1.26766	-0.521085	-0.179862	6.52217e-05	0.00196091	0.0333658	0.0616955	1.78875	0.341223	3.45515	1.26683
b1101	ptsG	chr	+	1157091	1158525	-0.356046	-0.253773	-0.301325	-1.33774	-1.4643	-1.41556	-1.20073	-0.915473	-0.997047	-0.29691	-1.41106	-1.06	2.91586e-05	0.00144605	0.0337288	0.0620027	1.11415	0.351059	2.16467	1.2755
b1853	yebK	chr	+	1934675	1935545	-0.446552	-0.414554	-0.0608483	-1.76959	-1.66146	-1.57979	-1.17959	-0.578727	-0.841558	-0.293291	-1.68192	-0.939772	0.00294072	0.0122481	0.0340858	0.0625818	1.38863	0.742147	2.61829	1.67266
b2500	purN	chr	+	2620255	2620894	-0.733253	-0.75572	-1.07764	0.96755	0.892306	1.10069	-0.697081	-0.523757	-1.77812	-0.875072	0.962886	-0.879509	0.000591855	0.00524567	0.0342408	0.0627889	-1.83796	-1.84239	0.279717	0.278859
b4558	yifL	chr	+	3992544	3992748	0.326133	-0.0403696	0.240337	-0.761538	-0.798273	-0.710731	0.576484	0.672164	-0.0455558	0.163063	-0.771303	0.481444	0.0107203	0.0285555	0.0343292	0.0628205	0.934366	1.25275	1.91105	2.38295
b0004	thrC	chr	+	3733	5020	0.743524	0.329804	0.787661	0.122293	-0.297587	-0.0508212	0.67289	0.597869	1.31099	0.602983	-0.10744	0.731912	0.0227529	0.0478517	0.0343424	0.0628205	0.710423	0.839352	1.63628	1.78925
b0931	pncB	chr	-	988376	989579	-1.41612	-1.33561	-1.19125	-0.267799	-0.452751	-0.525948	-0.679302	-0.794441	-1.02995	-1.2953	-0.402169	-0.788543	0.000984959	0.00629443	0.0349539	0.0633938	-0.893129	-0.386374	0.538445	0.76505
b0801	ybiC	chr	+	835573	836659	0.139196	0.227726	0.358093	-0.623464	-0.35951	-0.754028	1.46262	1.31645	0.330918	0.255104	-0.534926	1.19669	0.0076523	0.0224297	0.03484	0.0633938	0.79003	1.73161	1.72911	3.32099
b4371	rsmC	chr	-	4604691	4605723	-0.670318	-0.306247	-0.456423	0.0778484	0.28831	0.547625	-0.178365	-0.348987	-0.793841	-0.475609	0.258845	-0.361224	0.0119804	0.0303897	0.0348998	0.0633938	-0.734454	-0.620069	0.601045	0.65064
b3318	rplW	chr	-	3449403	3449706	0.552017	0.492506	0.665917	1.21553	1.16385	1.29886	0.598236	0.555317	0.929602	0.57806	1.20639	0.629907	0.000707815	0.00546564	0.0354187	0.064003	-0.628325	-0.576479	0.646927	0.670598
b2705	srlD	chr	+	2825758	2826538	0.749529	0.976847	0.663599	2.36435	2.36449	2.57589	2.23212	2.16522	2.01749	0.784815	2.40166	2.17829	0.000236471	0.00363313	0.0357682	0.0645181	-1.61684	-0.223374	0.326048	0.85656
b0946	ycbW	chr	+	1005174	1005717	-1.63599	-1.6655	-1.29068	-2.306	-2.71616	-2.63071	-2.11512	-1.41273	-1.61734	-1.53379	-2.5579	-1.81343	0.00419444	0.015057	0.0361166	0.0649089	1.02411	0.744469	2.0337	1.67536
b1124	potC	chr	-	1182048	1182843	-0.73441	-0.833763	-0.666665	0.194068	-0.11468	-0.24808	-1.1636	-0.905254	-0.481032	-0.755874	-0.0387209	-0.998246	0.0233914	0.0487812	0.036138	0.0649089	-0.717153	-0.959525	0.608297	0.514226
b4226	ppa	chr	-	4447144	4447675	1.18611	1.16703	1.13806	1.53303	1.63476	1.7879	1.35406	1.27664	1.37305	1.16463	1.62189	1.31843	0.0193283	0.0424482	0.0363439	0.0652	-0.457258	-0.303464	0.728369	0.810305
b1498	ydeN	chr	-	1578865	1580548	0.779803	0.899135	0.952496	-0.171235	-0.382439	-0.0409848	1.17377	0.702315	1.79728	0.888441	-0.24998	1.07312	0.00243661	0.0109281	0.0364733	0.0653536	1.13842	1.3231	2.2014	2.50203
b1902	ftnB	chr	+	1984948	1985452	0.308772	0.207305	0.472512	-2.61532	-1.60251	-1.6098	-0.49063	-1.1065	-0.0880899	0.334835	-1.96694	-0.634033	0.0171961	0.0392042	0.0376891	0.0669678	2.30177	1.33291	4.93063	2.51909
b3087	ygjR	chr	+	3235332	3236319	0.567518	1.46867	0.616038	-1.49105	-1.97097	-1.41054	0.6907	0.415527	-0.690532	0.876142	-1.7106	0.289554	0.00385857	0.0142213	0.0378271	0.067133	2.58674	2.00015	6.00739	4.00041
b4005	purD	chr	-	4202664	4203954	0.19025	0.602412	0.343838	2.1108	1.57204	2.62546	0.853324	0.704806	0.598911	0.381757	1.92026	0.754272	0.018717	0.0414726	0.0386682	0.0683	-1.5385	-1.16599	0.344242	0.445659
b3398	yrfF	chr	+	3524490	3526626	-1.4022	-1.55615	-1.25988	-3.02207	-2.91142	-3.10597	-1.78702	-2.29572	-2.41286	-1.3943	-2.98443	-2.12481	0.000244652	0.00364286	0.0387585	0.0683785	1.59013	0.859615	3.01076	1.81455
b0168	map	chr	-	188711	189506	-0.0876632	-0.0991239	-0.340395	0.138101	0.360151	0.254285	0.000845854	-0.0629575	0.0562772	-0.189785	0.254215	-0.0227497	0.0169156	0.0388094	0.0389267	0.0685129	-0.444	-0.276965	0.735094	0.825325
b4350	hsdR	chr	-	4581271	4584838	-0.289067	-0.226396	-0.18268	-1.51863	-1.89793	-1.5933	-0.898926	-0.974536	-1.37875	-0.223344	-1.71402	-1.02352	0.00415919	0.015057	0.0390569	0.0686609	1.49067	0.690492	2.8102	1.61383
b2421	cysM	chr	-	2536693	2537605	-0.123838	-0.479049	0.126841	-1.84368	-1.23708	-2.09294	-0.313092	-0.58974	-1.13426	-0.17823	-1.68605	-0.520919	0.00970391	0.0264152	0.0407221	0.0704718	1.50782	1.16513	2.8438	2.24253
b0438	clpX	chr	+	456649	457924	-0.164387	-0.232641	-0.35645	-0.653585	-0.522754	-0.797348	-0.423867	-0.272871	-0.35844	-0.272986	-0.624424	-0.37853	0.0172043	0.0392042	0.0407225	0.0704718	0.351438	0.245894	1.27583	1.18583
b3999	yjaG	chr	+	4197526	4198117	-0.0569726	0.0903235	-0.135008	0.278191	0.523473	0.501979	-0.140771	0.219839	-0.132192	-0.044196	0.428947	-0.0179477	0.0109805	0.0287347	0.0411091	0.0709288	-0.473143	-0.446895	0.720394	0.73362
b1524	yneH	chr	-	1610348	1611275	-0.77707	-1.25612	-0.798246	0.274657	0.858401	0.661457	0.0943325	-0.360258	-0.762078	-0.98699	0.595413	-0.218995	0.00274122	0.0117598	0.0413951	0.0711747	-1.5824	-0.814409	0.333925	0.568642
b0175	cdsA	chr	+	195676	196534	-1.09291	-1.21064	-1.15185	-0.850874	-0.952749	-0.878271	-1.04006	-1.12012	-1.25434	-1.16861	-0.896696	-1.12575	0.0050067	0.0169384	0.0413259	0.0711747	-0.271911	-0.229056	0.828222	0.853193
b3302	rpmD	chr	-	3442564	3442744	0.352017	0.308838	0.329678	0.686264	0.723497	0.564056	0.472157	0.538675	0.386994	0.328103	0.695448	0.480171	0.0160362	0.0373092	0.042561	0.0730107	-0.367345	-0.215276	0.775208	0.861381
b0314	betT	chr	+	328686	330720	-2.00743	-1.67143	-1.48291	-3.71883	-3.83724	-3.72462	-2.23437	-0.978387	-2.26942	-1.7017	-3.7713	-1.84797	0.00371881	0.0140052	0.0440087	0.0747152	2.0696	1.92333	4.19771	3.79298
b3884	yihW	chr	+	4072691	4073477	-0.243656	-0.647069	-0.740341	-2.38621	-2.27485	-2.27736	-1.48731	-1.29314	-1.88695	-0.610702	-2.31524	-1.49448	0.00518112	0.0171507	0.044261	0.0749769	1.70454	0.820757	3.25924	1.76633
b3095	yqjA	chr	+	3245794	3246457	-1.50997	-1.57158	-1.45437	-1.25307	-1.19036	-1.11046	-1.57216	-1.32481	-1.45034	-1.49793	-1.20206	-1.48676	0.00404671	0.0148048	0.0447976	0.075542	-0.295868	-0.284692	0.814582	0.820917
b1930	yedF	chr	+	2007502	2007736	1.48486	0.82768	0.824023	-1.58389	-0.986637	-1.55969	-0.341054	0.0244059	1.09315	0.944491	-1.3282	-0.0542505	0.00125306	0.00732831	0.0454053	0.0764173	2.27269	1.27395	4.83224	2.41823
b2811	csdE	chr	+	2942563	2943007	-1.48012	-1.51215	-1.51638	-0.998305	-0.901491	-0.974731	-1.41185	-1.52568	-1.91782	-1.50748	-0.960702	-1.54705	0.000916005	0.00606649	0.0455546	0.0765585	-0.546777	-0.586347	0.684548	0.666027
b3807	cyaY	chr	-	3991761	3992082	-1.88937	-1.85555	-1.94751	-1.16455	-1.33253	-1.23429	-1.63868	-1.64688	-2.04846	-1.88227	-1.25313	-1.70838	0.00111149	0.00683886	0.0456163	0.0765758	-0.629131	-0.455246	0.646566	0.729386
b0474	adk	chr	+	496398	497043	0.482836	0.356758	0.541141	1.46229	1.07646	1.07657	0.631335	0.670998	0.779611	0.457634	1.2082	0.666337	0.0168446	0.0387062	0.0457595	0.0767296	-0.750564	-0.541861	0.594371	0.686884
b0674	asnB	chr	-	696735	698400	-0.0395958	-0.499383	-0.274337	-1.41369	-1.27866	-1.2427	0.201646	-0.685658	0.0272625	-0.289843	-1.32447	-0.175875	0.00845646	0.0239385	0.0462627	0.07745	1.03462	1.14859	2.04858	2.21697
b2699	recA	chr	-	2820729	2821791	0.301291	0.261372	0.373563	0.904502	0.844323	0.954296	0.739863	0.742332	0.559633	0.313633	0.890046	0.71307	0.000210397	0.00338454	0.0477804	0.0794811	-0.576414	-0.176977	0.670629	0.884555
b4144	yjeI	chr	+	4370831	4371185	0.671787	0.562536	0.747908	0.117713	-0.0786515	-0.36684	0.259066	0.624635	0.338411	0.655812	-0.0646335	0.387493	0.0208693	0.0451007	0.0478275	0.0794811	0.720446	0.452127	1.64769	1.36806
b4171	miaA	chr	+	4397274	4398225	-3.28548	-3.45823	-3.28573	-4.0393	-4.17427	-4.32261	-4.01577	-3.7753	-3.75294	-3.34016	-4.1565	-3.8482	0.0017757	0.00899328	0.0479589	0.0795889	0.816339	0.3083	1.76093	1.23825
b1116	lolC	chr	+	1174649	1175849	-2.13935	-1.96508	-1.94171	-1.3178	-1.31108	-1.54571	-1.67673	-1.65186	-1.97494	-2.02381	-1.36705	-1.76042	0.00376287	0.0140777	0.0481327	0.0797215	-0.656762	-0.393376	0.6343	0.761346
b3415	gntT	chr	+	3544580	3545897	-1.78067	-1.66545	-1.29705	-3.17953	-3.30535	-3.06437	-2.07867	-1.4009	-2.42407	-1.57443	-3.20687	-1.91734	0.0026428	0.0116081	0.0497049	0.0819878	1.63244	1.28953	3.10037	2.44449
b2399	yfeD	chr	+	2516855	2517227	-2.00713	-1.72503	-2.04982	-4.17	-4.12637	-3.47649	-2.81256	-3.38132	-3.16988	-1.88376	-4.01523	-3.06699	0.00507808	0.0170842	0.0497213	0.0819878	2.13147	0.948236	4.38164	1.92951
b2215	ompC	chr	-	2309667	2310771	1.44433	1.41494	1.48336	1.69656	1.64385	1.66448	1.31928	1.33167	1.52947	1.44607	1.66812	1.35219	0.00120426	0.0071916	0.0501993	0.082593	-0.222053	-0.315929	0.857344	0.803333
b1564	relB	chr	-	1643656	1643896	0.0769442	0.532444	-0.116851	1.4604	1.33645	0.870044	0.435076	0.478461	0.472689	0.14961	1.30777	0.405496	0.0160321	0.0373092	0.0508539	0.0834856	-1.15816	-0.902273	0.448084	0.535043
b3316	rpsS	chr	-	3448269	3448548	1.09725	1.11455	1.07179	0.500584	0.488803	0.500527	0.657295	0.689617	0.838775	1.09823	0.494016	0.68864	0.000138881	0.00272097	0.0528099	0.0859388	0.604214	0.194624	1.52015	1.14443
b3164	pnp	chr	-	3307054	3309190	0.410035	0.433523	0.560192	0.854743	0.842175	0.709137	0.635883	0.659245	0.464442	0.474892	0.826173	0.623412	0.00713638	0.0212947	0.0530945	0.0861195	-0.351281	-0.202761	0.783888	0.868886
b1816	yoaE	chr	-	1898052	1899609	-1.1791	-1.19733	-1.36437	-1.72474	-1.75146	-1.70277	-1.26872	-1.39001	-1.54777	-1.25302	-1.73135	-1.3465	0.0113396	0.0293169	0.0530261	0.0861195	0.478333	0.384851	1.39313	1.30572
b0120	speD	chr	-	134787	135582	-0.0297504	0.699279	0.37235	1.52683	1.40624	1.79085	0.540919	0.533751	1.22929	0.357567	1.5146	0.64976	0.0135814	0.0330977	0.0537957	0.0870672	-1.15704	-0.864842	0.448433	0.549106
b4381	deoC	chr	+	4615345	4616125	2.30377	2.56637	2.26128	1.5711	1.59435	1.43104	2.2548	2.51181	1.8879	2.3649	1.54658	2.27736	0.00408475	0.0149073	0.0540154	0.0872192	0.818323	0.730787	1.76336	1.65954
b2909	ygfB	chr	-	3052887	3053466	0.115838	0.19667	0.540385	1.58406	1.27935	0.9985	0.208639	0.569954	0.913172	0.298997	1.33246	0.414847	0.0108397	0.0286614	0.0540883	0.0872192	-1.03346	-0.917613	0.488536	0.529384
b2951	yggS	chr	+	3093119	3093824	-0.267257	-0.0391933	-0.117078	0.869404	0.727593	0.750077	0.482182	0.466905	0.121165	-0.143234	0.77451	0.423606	0.000702034	0.00546564	0.0548351	0.0881744	-0.917745	-0.350905	0.529336	0.784092
b1704	aroH	chr	+	1786458	1787505	-0.506044	-0.609144	-0.893967	1.09805	1.15907	0.581624	0.0317205	0.0609847	0.616712	-0.689142	0.997606	0.135701	0.0032714	0.0131297	0.0549011	0.0881853	-1.68675	-0.861905	0.310626	0.550226
b1035	ycdY	chr	+	1098862	1099417	0.447092	0.406929	0.598186	1.18138	1.28627	1.107	0.197789	0.806639	0.146449	0.491596	1.2244	0.391502	0.000870979	0.00594287	0.0552643	0.0886729	-0.732801	-0.832895	0.601735	0.561402
b2926	pgk	chr	-	3069480	3070644	1.76651	1.84141	1.79697	2.58379	2.51563	2.47631	2.28116	2.29164	2.44962	1.80582	2.5384	2.30709	0.000105537	0.00241761	0.056296	0.0900373	-0.732583	-0.231318	0.601825	0.851857
b4342	yjiT	chr	+	4570436	4571939	0.261187	-0.141692	0.00458293	-1.91772	-2.09334	-2.11882	-0.306205	-0.996204	0.604112	0.0155447	-2.04457	-0.506608	0.000508375	0.00504647	0.0572563	0.091084	2.06011	1.53796	4.17019	2.90384
b1765	ydjA	chr	-	1846148	1846700	1.36525	1.16303	1.20612	0.755685	0.773846	0.83851	1.29801	2.04692	2.11798	1.21334	0.775514	1.61019	0.00934551	0.0258289	0.057743	0.091747	0.437828	0.834679	1.35456	1.78346
b3397	nudE	chr	-	3523610	3524171	-2.96286	-2.92729	-3.0473	-3.27234	-3.57014	-3.50311	-2.97018	-3.1908	-3.22592	-3.0002	-3.45383	-3.14049	0.0230516	0.0483435	0.0578114	0.091747	0.453625	0.313335	1.36948	1.24258
b1343	dbpA	chr	+	1407534	1408908	-1.39937	-1.97264	-1.15258	-0.303744	-0.0687141	-0.689972	-1.72551	-1.11334	-0.841558	-1.54896	-0.26093	-1.43422	0.0218795	0.0464617	0.0587706	0.0929962	-1.28803	-1.17329	0.409508	0.443409
b3750	rbsC	chr	+	3933310	3934276	-0.953503	-0.518204	-0.903658	-3.55131	-3.09617	-2.92113	-2.49763	-2.43257	-2.78132	-0.80542	-3.26082	-2.50783	0.000775028	0.00579064	0.0601861	0.0948328	2.4554	0.752993	5.48465	1.68529
b0786	ybhL	chr	+	819106	819811	-0.0746382	0.10394	0.0868715	-0.341751	-0.383648	-0.437671	-0.0571765	-0.285532	-0.13426	0.0537227	-0.381511	-0.148951	0.00741986	0.0220083	0.0601269	0.0948328	0.435233	0.23256	1.35213	1.17492
b2521	sseA	chr	+	2650515	2651361	1.07918	1.65649	1.43569	0.0383454	-0.232993	0.2659	0.595556	0.546633	0.407041	1.40151	-0.0531143	0.543813	0.00378067	0.0140873	0.0609052	0.0955615	1.45462	0.596928	2.74085	1.51249
b3671	ilvB	chr	-	3849118	3850807	-0.823143	-0.991607	-0.617497	-2.14982	-2.1413	-1.8674	-1.18578	-1.23318	-1.79329	-0.80456	-2.09716	-1.31464	0.00105767	0.00658944	0.0611089	0.0956794	1.2926	0.782516	2.44969	1.72013
b3429	glgA	chr	-	3564622	3566056	-1.12142	-0.869703	-1.00683	-1.49116	-1.50713	-1.72088	-1.02298	-1.15862	-1.41381	-1.00284	-1.53973	-1.15583	0.00524143	0.0172284	0.0612964	0.0958722	0.536891	0.383899	1.45084	1.30486
b3097	yqjC	chr	+	3246990	3247359	0.0783965	-0.364429	0.165106	-0.745196	-1.13713	-1.06437	-0.267463	-0.658698	-0.653093	-0.0443715	-1.0078	-0.497571	0.0120088	0.03041	0.0617606	0.0962948	0.963428	0.510229	1.94994	1.42428
b4077	gltP	chr	+	4292503	4293817	-1.46407	-1.03877	-1.14293	-2.43111	-2.36242	-2.88169	-2.02065	-1.88832	-2.14059	-1.20347	-2.46903	-2.02738	0.00351171	0.0137604	0.0620559	0.096654	1.26556	0.441653	2.40421	1.35816
b2126	yehU	chr	-	2210980	2212666	-1.32476	-1.00016	-1.22051	-2.71829	-3.01074	-3.20353	-2.57265	-2.65032	-2.36142	-1.16911	-2.95527	-2.54626	0.000874069	0.00594287	0.0652031	0.100922	1.78615	0.409009	3.44894	1.32777
b0484	copA	chr	-	508098	510603	-0.295011	-0.481733	-0.30523	-1.39104	-1.32559	-1.36756	-1.19263	-1.2866	-1.11677	-0.369705	-1.35826	-1.25303	0.00178315	0.00900035	0.0651928	0.100922	0.988558	0.105231	1.9842	1.07567
b2261	menC	chr	-	2373021	2373984	-1.06472	-1.46439	-1.32321	-0.275052	-0.55543	-0.429453	-0.934918	-0.923655	-1.59059	-1.31134	-0.430266	-1.06742	0.0053793	0.0175423	0.0663938	0.102446	-0.881079	-0.637151	0.542961	0.642982
b2041	rfbB	chr	-	2109999	2111085	0.807389	1.06095	0.864479	1.87252	1.79625	2.00988	1.00142	1.08597	1.62383	0.919508	1.85887	1.10964	0.000708335	0.00546564	0.0665859	0.10253	-0.939359	-0.749227	0.521465	0.594922
b1104	ycfL	chr	+	1161469	1161847	-1.74386	-1.30281	-1.52477	-2.69045	-2.50995	-3.19682	-2.46026	-1.78476	-2.01788	-1.53	-2.6762	-2.23889	0.0101073	0.0271657	0.0674276	0.103298	1.14621	0.437307	2.21331	1.35407
b3149	diaA	chr	+	3293830	3294421	-1.62097	-1.55011	-1.26136	-2.60066	-2.6343	-2.47036	-2.2175	-2.25188	-1.80215	-1.46302	-2.59115	-2.13394	0.00378791	0.0140873	0.0676435	0.10341	1.12813	0.457209	2.18576	1.37288
b3786	rffE	chr	+	3968155	3969286	-0.93264	-1.10493	-1.36483	-0.367241	-0.156288	-0.305788	-0.597545	-0.648136	-1.08449	-1.16199	-0.258818	-0.715379	0.00936689	0.0258289	0.0678187	0.103571	-0.903167	-0.45656	0.534712	0.728722
b2171	yeiP	chr	+	2263471	2264044	0.96335	1.17492	1.09199	1.90656	1.87151	1.94952	1.47032	1.61896	1.14003	1.07886	1.89466	1.4742	0.00234875	0.0107279	0.0683421	0.104051	-0.815798	-0.420457	0.568094	0.747188
b0312	betB	chr	-	326484	327957	0.106112	-0.338121	-0.127554	-1.31975	-1.16441	-1.21523	0.681662	0.868184	-0.537616	-0.115413	-1.23724	0.465753	0.00726687	0.0216407	0.0690419	0.104794	1.12183	1.70299	2.17622	3.25575
b2622	intA	chr	+	2754180	2755422	-0.171436	0.36005	-0.0309489	-1.63147	-1.24707	-1.30356	-0.202061	0.0418405	-0.993561	0.0531857	-1.40168	-0.277547	0.00251561	0.0111481	0.0691382	0.104834	1.45486	1.12413	2.74131	2.1797
b4004	zraR	chr	+	4201342	4202668	-0.884871	-1.46523	-0.591866	-2.36115	-2.40539	-2.94306	-1.69672	-2.12893	-1.09949	-1.02988	-2.47923	-1.68197	0.00941244	0.025906	0.0692579	0.104879	1.44936	0.797267	2.73086	1.73781
b0002	thrA	chr	+	336	2799	0.620488	0.636454	0.0763926	-0.631001	-0.273981	-0.374323	0.375571	0.27168	-0.220349	0.382382	-0.413424	0.239584	0.0232181	0.0485559	0.0700294	0.105754	0.795806	0.653008	1.73605	1.57244
b3195	yrbF	chr	-	3337277	3338087	-1.21952	-1.04071	-1.1169	-0.851736	-0.599754	-0.602536	-1.03236	-0.821838	-1.16166	-1.12082	-0.688284	-0.97163	0.0163783	0.0379865	0.0703806	0.10607	-0.432536	-0.283346	0.740958	0.821683
b1244	oppB	chr	+	1300922	1301843	-1.18087	-1.32379	-1.07271	-0.61549	-0.651547	-0.485919	-0.69142	-0.982432	-0.853738	-1.189	-0.60507	-0.82252	0.00355853	0.0138346	0.071509	0.10712	-0.58393	-0.21745	0.667144	0.860084
b2891	prfB	chr	-	3033205	3034304	1.33897	1.04398	0.96039	1.65765	1.8427	1.90649	1.14404	1.38151	1.61848	1.0805	1.78026	1.29554	0.010914	0.0286614	0.0714966	0.10712	-0.699761	-0.484715	0.615674	0.714638
b2707	srlR	chr	+	2827068	2827842	0.110627	0.553053	0.576734	-0.274179	-0.67706	-0.373696	-0.0849912	0.578342	0.0473468	0.446144	-0.491347	0.0974784	0.0129259	0.0320778	0.0714361	0.10712	0.937491	0.588825	1.91519	1.50402
b4078	yjcO	chr	-	4294458	4295148	-0.954961	-1.02418	-0.923456	-1.79003	-1.80614	-2.004	-1.51663	-0.976929	-0.671633	-0.960104	-1.84224	-1.23276	0.00195346	0.00952908	0.0721619	0.107881	0.882135	0.609481	1.8431	1.52571
b3284	smg	chr	-	3430012	3430486	-0.793157	-1.01943	-1.96363	-3.18353	-3.50846	-3.05459	-2.06917	-2.44075	-0.984017	-1.30589	-3.31938	-2.0218	0.020362	0.0441968	0.0723649	0.108076	2.01349	1.29758	4.03758	2.45816
b0111	ampE	chr	+	119280	120135	0.835278	0.273043	0.121054	-0.943984	-0.871232	-1.77939	-0.686222	-0.348853	0.127098	0.344982	-1.06877	-0.454709	0.0136605	0.0332312	0.0780544	0.115415	1.41375	0.614062	2.66429	1.53056
b4232	fbp	chr	-	4452633	4453632	0.83241	1.18926	0.732709	0.339199	0.08286	0.0120353	0.37444	0.440601	0.799918	0.896015	0.158756	0.444464	0.0131924	0.0324151	0.0809674	0.119249	0.737259	0.285709	1.66701	1.21901
b4234	yjgA	chr	-	4455336	4455888	-1.12238	-1.02634	-1.03303	-0.493277	-0.411994	-0.268906	-0.679075	-1.38316	-0.96825	-1.04683	-0.420364	-0.9994	0.00330446	0.0132241	0.082316	0.121115	-0.626464	-0.579037	0.647762	0.669411
b1907	tyrP	chr	+	1987704	1988916	-0.594117	-0.382611	-0.393803	0.0319645	0.0287734	0.392146	-0.435241	-0.118369	-0.865977	-0.436491	0.106643	-0.408781	0.019589	0.0428312	0.0828782	0.121582	-0.543134	-0.515423	0.686278	0.699588
b3963	fabR	chr	+	4159146	4159794	-3.06863	-3.0871	-3.23453	-4.48745	-4.35119	-4.26056	-4.08269	-4.00999	-4.28443	-3.12991	-4.37845	-4.06921	0.000171775	0.00313669	0.0873218	0.127099	1.24853	0.309234	2.376	1.23905
b3131	agaR	chr	-	3275877	3276687	-4.14931	-4.34445	-4.00778	-4.86372	-4.73687	-4.66527	-4.5853	-4.428	-4.65443	-4.16319	-4.76692	-4.55439	0.0113668	0.029333	0.0890549	0.129174	0.603729	0.212539	1.51964	1.15873
b3092	uxaC	chr	-	3241350	3242763	1.67134	2.20774	2.01693	0.490163	-0.326039	-0.125768	2.15597	1.50034	0.476855	1.9789	-0.0166851	1.54594	0.0045245	0.0158912	0.0894407	0.129298	1.99559	1.56262	3.98779	2.95391
b1439	ydcR	chr	+	1508026	1509433	-0.741815	-0.8665	-0.707674	-1.6837	-1.609	-1.64933	-1.30274	-0.288108	-0.462065	-0.766637	-1.65101	-0.917459	0.00074896	0.00568981	0.0908277	0.130871	0.884371	0.73355	1.84596	1.66272
b1990	erfK	chr	-	2060414	2061347	-1.30195	-1.004	-0.709829	-2.13483	-2.10448	-1.90087	-0.302738	-1.33517	-1.43292	-0.985265	-2.06676	-0.903219	0.0146349	0.0350678	0.10004	0.142137	1.08149	1.16354	2.11623	2.24006
b1446	ydcY	chr	+	1515671	1515905	-0.25641	-0.367595	-0.190588	-1.33098	-1.26202	-1.15457	-0.570064	-0.879929	-1.08683	-0.277165	-1.27643	-0.756776	0.000178089	0.00313669	0.102737	0.145414	0.999263	0.519652	1.99898	1.43361
b2232	ubiG	chr	+	2337588	2338311	0.303272	0.667242	-0.058189	1.17284	1.6906	1.23261	0.965049	1.05085	0.393052	0.250029	1.39315	0.908904	0.0181252	0.0404718	0.10323	0.145973	-1.14313	-0.484251	0.452777	0.714868
b1127	pepT	chr	+	1185066	1186293	0.122278	0.0666078	0.192231	-1.14128	-1.21095	-0.981312	-0.948274	-0.61043	-0.92848	0.12689	-1.14585	-0.867523	0.000471645	0.00497374	0.107093	0.150152	1.27274	0.278323	2.41619	1.21278
b1570	dicA	chr	+	1645957	1646365	-2.67525	-2.42522	-2.81551	-2.00423	-2.21921	-2.04052	-2.2276	-2.5582	-2.82555	-2.63043	-2.1225	-2.4903	0.0218991	0.0464617	0.107832	0.151047	-0.507929	-0.3678	0.703231	0.774963
b3559	glyS	chr	-	3720350	3722420	0.547957	0.567205	0.553076	0.751702	0.70518	0.762851	0.672497	0.447097	0.373203	0.555726	0.733816	0.541679	0.00514778	0.0171477	0.109679	0.153345	-0.17809	-0.192138	0.883872	0.875308
b0922	mukF	chr	+	973541	974864	-1.39972	-1.39103	-1.46987	-1.08416	-0.977226	-1.07322	-1.42818	-1.25152	-1.12616	-1.43029	-1.02785	-1.29779	0.00129027	0.00747552	0.111239	0.154943	-0.402433	-0.269934	0.756581	0.829358
b2827	thyA	chr	-	2962382	2963177	0.43311	0.200273	0.0296225	1.62551	1.10292	1.12182	0.713242	0.312409	1.08363	0.173123	1.27546	0.600266	0.00951865	0.0260538	0.112295	0.156122	-1.10234	-0.675198	0.46576	0.626246
b1209	lolB	chr	-	1262099	1262723	0.785227	0.283026	0.651073	1.53594	1.8287	1.8264	0.895787	1.34018	0.0845373	0.526187	1.72227	0.892947	0.00493278	0.0167692	0.113022	0.156987	-1.19609	-0.829326	0.436458	0.562792
b0027	lspA	chr	+	25206	25701	-2.82571	-2.58897	-2.44089	-1.86354	-2.0766	-1.77884	-2.09196	-2.2833	-2.70813	-2.5991	-1.94603	-2.26715	0.00865624	0.0244576	0.113508	0.157221	-0.65307	-0.321123	0.635926	0.800447
b4314	fimA	chr	+	4541137	4541686	-0.00812396	-0.313007	-0.241119	-0.944231	-0.791768	-0.882782	-0.717714	-0.796829	-0.542438	-0.219292	-0.874233	-0.719785	0.00766804	0.0224317	0.114424	0.158343	0.654941	0.154448	1.57455	1.113
b2292	yfbS	chr	-	2407541	2409374	-1.58356	-0.806702	-1.13059	-2.51982	-3.08514	-3.30141	-1.59273	-2.23152	-2.68446	-1.1725	-2.93381	-2.0706	0.0052119	0.0172073	0.118047	0.162272	1.76131	0.863207	3.39006	1.81908
b3107	yhaL	chr	+	3253064	3253229	-0.019282	-0.4717	-0.285477	-3.58296	-3.99242	-3.36922	-2.08959	-0.459794	-2.90685	-0.254789	-3.74156	-1.854	0.000210675	0.00338454	0.118323	0.162381	3.48677	1.88756	11.2104	3.70008
b2027	cld	chr	-	2095344	2096325	-1.63091	-1.47055	-1.63436	-0.938565	-1.13518	-0.900474	-1.10304	-1.36527	-1.14786	-1.58131	-1.02771	-1.22065	0.00383517	0.0141701	0.121536	0.165873	-0.553607	-0.192942	0.681314	0.87482
b0565	ompT	chr	-	583902	584856	0.801088	0.648649	0.764443	1.69887	1.46554	1.60867	1.35345	1.20843	1.52844	0.741212	1.57226	1.32412	0.000920812	0.00606649	0.124728	0.168836	-0.831049	-0.24814	0.56212	0.841982
b4174	hflK	chr	+	4400060	4401320	-0.254991	-0.227495	-0.333425	-0.692057	-0.755306	-0.675828	-0.251906	-0.180457	-0.633217	-0.280332	-0.720345	-0.273955	0.000568664	0.00524536	0.125002	0.168954	0.440013	0.446389	1.35662	1.36263
b3103	yhaH	chr	+	3250325	3250691	0.712324	0.724614	0.755388	-0.80823	-0.30027	-0.581586	-0.0779365	-0.344316	-0.223323	0.742528	-0.560406	-0.202036	0.012158	0.0306835	0.126035	0.170142	1.30293	0.35837	2.4673	1.28198
b1857	znuA	chr	-	1939674	1940607	-0.286762	-0.584739	-0.256555	-0.913416	-0.854688	-1.23881	-0.697312	-0.72815	-0.689258	-0.381921	-0.951431	-0.68438	0.0174916	0.0395822	0.129146	0.173868	0.569509	0.267051	1.48402	1.20335
b3942	katG	chr	+	4131857	4134038	0.665665	0.490822	0.706964	0.0849764	0.0689485	0.0701176	0.745021	0.569592	0.174513	0.616578	0.0752407	0.574272	0.0139569	0.0336728	0.129521	0.174215	0.541337	0.499032	1.45532	1.41326
b3461	rpoH	chr	-	3597951	3598806	-1.58191	-1.38747	-1.4934	-1.80268	-1.8237	-1.86638	-1.48066	-1.39964	-1.7774	-1.47917	-1.83322	-1.51513	0.0176634	0.0399101	0.132789	0.177968	0.354055	0.318093	1.27815	1.24668
b2982	insH	chr	+	3128199	3129216	-0.2814	-0.324458	-0.313368	-0.849512	-0.962506	-1.02332	-0.873729	-0.706896	-0.846847	-0.305702	-0.934328	-0.810217	0.00420666	0.015057	0.134347	0.179591	0.628626	0.124112	1.54609	1.08984
b1334	fnr	chr	-	1396797	1397550	-0.219279	0.0854172	-0.204905	0.585857	0.832311	0.764204	0.644321	0.553974	0.504993	-0.115337	0.725786	0.597934	0.00326114	0.0131239	0.1499	0.197174	-0.841124	-0.127852	0.558209	0.915193
b0643	ybeL	chr	+	674240	674723	0.86036	1.44666	1.80905	-0.143055	0.0636005	-0.389463	0.193868	0.96167	0.116997	1.38768	-0.0831144	0.474634	0.0173355	0.0393485	0.151603	0.198712	1.47079	0.557748	2.77174	1.47197
b3713	yieF	chr	+	3892674	3893241	0.433783	0.780742	0.878944	-0.278331	-0.609536	-0.155341	0.753677	-0.050107	-0.0401161	0.719616	-0.416438	0.296537	0.00545931	0.01771	0.153927	0.201226	1.13605	0.712975	2.19779	1.63918
b2007	yeeX	chr	-	2077055	2077385	0.11973	0.0181675	-0.0131769	0.770582	0.589455	0.765286	0.517509	0.608696	0.624395	0.0330191	0.682715	0.572135	0.00136409	0.00774513	0.160286	0.208079	-0.649696	-0.11058	0.637415	0.926215
b1293	sapB	chr	-	1352528	1353494	-0.808336	-1.10278	-0.887051	-0.602713	-0.303842	-0.327402	-0.74697	-0.465228	-0.684457	-0.938925	-0.441555	-0.667353	0.0163008	0.0378656	0.161575	0.209205	-0.49737	-0.225798	0.708397	0.855122
b0280	yagN	chr	-	294362	294803	1.06322	0.896767	1.05116	-0.876345	-0.979244	-0.122471	-0.177747	-0.260722	0.132679	1.00624	-0.797801	-0.174601	0.0219256	0.0464617	0.1637	0.211588	1.80404	0.623199	3.49197	1.54029
b4206	ytfB	chr	-	4426101	4426740	-0.23163	-0.504538	-0.572895	-1.12266	-1.37915	-1.34977	-0.49063	0.0837309	-1.16988	-0.458147	-1.29204	-0.436008	0.00369852	0.0140052	0.166158	0.214207	0.833891	0.85603	1.78249	1.81005
b3172	argG	chr	+	3316658	3318002	1.46626	1.54032	1.50086	0.00811771	0.328939	0.299271	0.85031	0.482386	1.87888	1.5134	0.203151	0.810752	0.00471495	0.0163457	0.170377	0.2187	1.31025	0.607601	2.47985	1.52372
b2908	pepP	chr	-	3051536	3052862	0.525877	0.520359	0.493987	0.801654	0.880013	0.884517	0.495583	0.849319	0.527992	0.506961	0.851846	0.609658	0.00274941	0.0117598	0.171588	0.219686	-0.344885	-0.242189	0.787371	0.845462
b3607	cysE	chr	-	3779763	3780585	0.0434359	0.308274	-0.124959	-0.63449	-0.904652	-0.711615	-0.630921	0.177176	-0.365476	0.0421354	-0.77191	-0.338577	0.0083752	0.0238101	0.173742	0.222252	0.814045	0.433333	1.75813	1.35035
b1804	rnd	chr	-	1884887	1886015	-1.17568	-1.47841	-1.61785	-0.626834	-0.793026	-0.502489	-1.75609	-0.798379	-1.05324	-1.47169	-0.678856	-1.28729	0.0109009	0.0286614	0.181599	0.231706	-0.792834	-0.60843	0.577209	0.65591
b1805	fadD	chr	-	1886084	1887770	-0.931877	-1.00593	-0.733822	-1.59516	-1.56266	-1.25701	-1.41436	-1.05831	-0.623916	-0.876245	-1.51136	-1.14411	0.0147141	0.0351109	0.185309	0.235632	0.635117	0.367253	1.55306	1.28989
b3020	ygiS	chr	-	3164132	3165740	0.0168053	0.277016	0.0997684	-3.0447	-2.26202	-1.81644	-1.38371	-2.0018	-1.68446	0.154419	-2.49956	-1.65314	0.0164847	0.0381249	0.188461	0.239028	2.65398	0.846419	6.29401	1.79803
b0888	trxB	chr	-	930307	931273	-0.0387787	0.181566	0.185445	0.475241	0.562503	0.4946	0.327084	0.499049	0.166528	0.123328	0.513847	0.361508	0.0223501	0.0470711	0.195759	0.246812	-0.390519	-0.15234	0.762855	0.89979
b4602	ynhF	chr	-	1735479	1735569	-2.76022	-2.75744	-2.91201	-3.37623	-3.52867	-3.7459	-3.26204	-3.46459	-3.34425	-2.82422	-3.50413	-3.35872	0.0095544	0.0260986	0.209196	0.261539	0.679909	0.145412	1.60204	1.10605
b0762	ybhT	chr	+	793995	794145	-3.90768	-4.0621	-4.02995	-3.35686	-3.37235	-3.27082	-3.58351	-3.48249	-3.32743	-4.0212	-3.35759	-3.55842	0.000616219	0.00531671	0.213492	0.266463	-0.663608	-0.200835	0.631297	0.870047
b4039	ubiC	chr	+	4250528	4251026	-0.99407	-1.60046	-0.752361	-2.76538	-2.83672	-1.92141	-1.97606	-1.76302	-2.24896	-1.16603	-2.65011	-1.95018	0.0237716	0.0492867	0.218304	0.271558	1.48407	0.699927	2.79737	1.62442
b3546	eptB	chr	-	3706806	3708498	-1.76923	-1.62033	-1.66129	-4.03446	-3.78005	-3.75169	-3.66623	-3.5178	-2.5484	-1.68065	-3.85855	-3.47138	0.000255791	0.00369356	0.218596	0.271694	2.17789	0.387163	4.52492	1.30782
b4167	yjeF	chr	+	4392088	4393636	-1.59766	-1.22838	-1.8613	-2.70947	-2.46721	-2.73063	-2.20401	-2.04108	-2.67967	-1.60948	-2.62348	-2.23235	0.0153359	0.0362462	0.223782	0.276754	1.014	0.391122	2.0195	1.31141
b0028	fkpB	chr	+	25825	26275	-0.597018	0.0138294	-0.258879	0.734088	0.74151	0.48312	0.376245	0.561517	-0.301128	-0.270466	0.690977	0.318301	0.0193103	0.0424482	0.229386	0.282044	-0.961443	-0.372676	0.513543	0.772348
b1808	yoaA	chr	-	1889348	1891259	-3.03741	-3.02363	-3.10634	-2.89555	-2.95435	-2.87172	-2.84103	-3.48026	-3.50996	-3.06881	-2.91723	-3.16677	0.0138555	0.0336007	0.231046	0.283851	-0.15158	-0.249536	0.900264	0.841167
b0763	modA	chr	+	794311	795085	1.27151	0.891348	0.776095	0.101459	0.0177952	0.0160057	0.604656	0.332764	0.0317499	0.94582	0.0445637	0.421973	0.0216061	0.0461817	0.232705	0.285183	0.901256	0.377409	1.86769	1.29901
b1855	lpxM	chr	-	1937245	1938217	-0.828033	-0.658037	-0.644171	-0.0676476	0.0979828	-0.125768	-0.443456	-0.550942	0.0223102	-0.698752	-0.00260943	-0.438872	0.00172029	0.00882798	0.23315	0.285494	-0.696142	-0.436263	0.61722	0.739047
b0081	mraZ	chr	+	89633	90092	-4.16254	-4.50464	-4.43641	-5.39891	-5.9029	-5.42512	-5.13355	-5.27139	-5.49181	-4.38217	-5.64059	-5.25002	0.00576248	0.0184627	0.2393	0.291824	1.25842	0.390568	2.39234	1.31091
b3526	kdgK	chr	+	3677441	3678371	1.34603	1.27212	1.01358	0.0550036	0.187859	-0.0375261	0.841134	0.521906	0.0175671	1.18773	0.0816787	0.583169	0.00139098	0.00775454	0.23965	0.292012	1.10605	0.50149	2.15255	1.41568
b3283	yrdD	chr	-	3429441	3429984	-2.28633	-2.32022	-2.09394	-3.38823	-3.26202	-2.94572	-3.21826	-2.84213	-2.38945	-2.23185	-3.24846	-2.93942	0.00707036	0.0211527	0.253733	0.307161	1.01661	0.309041	2.02316	1.23888
b2520	yfhM	chr	-	2645347	2650309	-1.03415	-1.04635	-0.991621	-2.28426	-2.28442	-1.93226	-1.64123	-2.12942	-1.99807	-1.02504	-2.21953	-1.85956	0.00930078	0.0258289	0.265242	0.318762	1.19449	0.35997	2.28864	1.2834
b3033	yqiB	chr	-	3174879	3175302	-1.74908	-1.6728	-1.57127	-3.17042	-2.70155	-2.94479	-2.3651	-2.45979	-3.02051	-1.67268	-2.94749	-2.52583	0.0055304	0.0179017	0.267121	0.320244	1.27481	0.42166	2.41967	1.33947
b0131	panD	chr	-	146313	146694	0.378075	0.104458	0.617968	-0.46366	-0.244392	-0.43728	-0.333707	-0.318295	-0.0523904	0.360216	-0.364989	-0.294561	0.0222408	0.0469074	0.273348	0.32692	0.725205	0.0704277	1.65314	1.05003
b4020	yjbB	chr	+	4225753	4227385	-0.380099	-0.397346	-0.729369	-1.76138	-2.04675	-1.77064	-1.33956	-0.691464	-1.94749	-0.553449	-1.89536	-1.25636	0.000910721	0.00606649	0.276557	0.329962	1.34191	0.638999	2.53487	1.55725
b1216	chaA	chr	-	1269971	1271072	-0.552899	-0.707658	-0.773075	0.427535	0.0800526	0.464885	-0.0785398	-0.205189	0.402479	-0.69211	0.269444	-0.0738319	0.00518323	0.0171507	0.278774	0.331545	-0.961554	-0.343276	0.513504	0.78825
b1232	purU	chr	-	1287004	1287847	0.227029	-0.0211281	0.267113	0.908394	1.29211	1.23997	0.29895	0.665894	1.26308	0.146889	1.12048	0.488473	0.00357409	0.0138589	0.286535	0.339419	-0.973592	-0.632008	0.509237	0.645278
b2064	asmA	chr	-	2137782	2139636	-2.22392	-2.52009	-2.44683	-2.97912	-3.12725	-3.27736	-2.88961	-2.79142	-3.17395	-2.41029	-3.10989	-2.93095	0.0041416	0.015057	0.291305	0.344796	0.6996	0.178935	1.62405	1.13205
b3157	yhbT	chr	-	3298773	3299298	0.391234	0.347368	0.633042	-1.42511	-0.996338	-0.704073	-0.658056	-0.739411	-0.849706	0.459352	-1.10188	-0.728206	0.00980606	0.0264995	0.294961	0.348293	1.56124	0.373679	2.95107	1.29565
b1068	yceM	chr	+	1126028	1126952	-2.26715	-1.60327	-2.09569	-3.10404	-2.65106	-3.28405	-2.50901	-2.45282	-3.08971	-1.97786	-2.93545	-2.63984	0.020245	0.0440441	0.301236	0.353947	0.957594	0.295613	1.94207	1.22741
b2817	amiC	chr	-	2945778	2947032	-2.44396	-2.37951	-2.42731	-2.60082	-2.68079	-2.76574	-2.56186	-2.70129	-2.3067	-2.4324	-2.67559	-2.56253	0.0191207	0.0422415	0.302652	0.355121	0.243184	0.113062	1.1836	1.08152
b1273	yciN	chr	-	1328440	1328692	-1.34329	-1.26832	-1.30463	-0.6856	-0.55616	-0.725413	-0.72879	-0.709332	-0.738981	-1.30169	-0.63459	-0.699467	0.0021796	0.0102393	0.303226	0.355514	-0.667103	-0.0648777	0.62977	0.956026
b1242	ychE	chr	+	1297820	1298468	-1.82051	-1.63934	-1.92577	-1.13398	-1.16249	-1.30829	-1.05006	-1.80772	-1.66399	-1.80883	-1.17576	-1.39645	0.00644311	0.0199041	0.31774	0.371362	-0.63307	-0.220697	0.644803	0.858151
b1768	pncA	chr	+	1849910	1850552	-0.141903	-0.370013	-0.29309	0.147063	0.188011	-0.0326589	0.286978	-0.648827	-0.463615	-0.299863	0.146847	-0.246075	0.0179457	0.0403034	0.318187	0.371592	-0.44671	-0.392922	0.733714	0.761586
b0557	borD	chr	-	577822	578116	0.124983	0.151161	0.152284	0.475895	0.53789	0.649747	0.34368	0.161093	0.625454	0.151529	0.527181	0.307765	0.0128993	0.0320778	0.319261	0.372361	-0.375652	-0.219416	0.770757	0.858913
b3468	yhhN	chr	+	3603773	3604400	0.075158	-0.308114	0.68952	-1.48656	-1.16784	-1.71644	-0.927527	-1.52568	-1.10408	0.134384	-1.38267	-1.13245	0.0154319	0.0363577	0.319345	0.372361	1.51705	0.25022	2.86205	1.18939
b4156	yjeM	chr	+	4381861	4383364	-0.496763	-0.70529	-0.0939131	-1.27234	-1.7994	-1.7826	-1.71302	-1.28431	-0.832303	-0.433044	-1.61084	-1.44139	0.00893928	0.0250866	0.336666	0.391026	1.17779	0.16945	2.26231	1.12463
b1655	ydhO	chr	+	1732458	1733274	-0.883939	-0.642296	-0.826745	-1.88393	-1.97378	-1.71252	-1.41046	-1.91485	-1.68446	-0.780673	-1.89212	-1.65647	0.000539521	0.00524078	0.338441	0.392781	1.11144	0.235645	2.16062	1.17743
b1770	ydjF	chr	-	1852119	1852878	-0.162938	-0.721688	-0.346209	-2.30449	-2.24096	-1.96751	-1.94622	-2.22085	-1.01069	-0.433175	-2.22698	-1.84493	0.00176483	0.00896873	0.34846	0.402214	1.79381	0.382053	3.46729	1.30319
b3166	truB	chr	-	3309854	3310799	-1.1219	-1.12618	-1.03258	-0.480405	-0.457532	-0.760158	-0.849904	-0.592839	-0.637151	-1.08461	-0.518685	-0.731937	0.0240105	0.0495966	0.370182	0.424327	-0.565923	-0.213253	0.675523	0.86259
b4384	deoD	chr	+	4618905	4619625	0.716907	0.856067	0.807039	2.0631	1.94743	1.84252	1.79014	1.92597	1.90629	0.800605	1.97322	1.85659	0.000294468	0.00394941	0.379596	0.433103	-1.17262	-0.116634	0.443616	0.922337
b3252	csrD	chr	-	3399413	3401354	-2.52324	-2.18947	-2.48354	-3.61759	-3.10562	-3.27493	-3.16048	-3.34961	-2.95576	-2.41503	-3.32723	-3.30185	0.0094653	0.0259749	0.404022	0.456095	0.912199	0.0253753	1.88191	1.01774
b1654	grxD	chr	-	1731777	1732125	0.524781	0.519144	0.371867	0.77968	0.858484	0.916089	0.785803	0.9031	0.522402	0.460917	0.825823	0.780065	0.00472038	0.0163457	0.421618	0.473804	-0.364907	-0.045758	0.776519	0.968781
b2813	mltA	chr	-	2944102	2945200	-1.15377	-1.05818	-1.07463	-0.773395	-0.920554	-0.891036	-1.01517	-0.748114	-1.22926	-1.09613	-0.863099	-0.950743	0.016717	0.0385916	0.436229	0.487647	-0.23303	-0.0876443	0.850846	0.941058
b3156	yhbS	chr	-	3298276	3298780	0.0708529	-0.134013	0.47303	-0.969269	-1.11372	-0.994827	-1.10421	-0.686817	-0.935178	0.134102	-1.04338	-0.905973	0.0179041	0.0403034	0.442073	0.492699	1.17748	0.13741	2.26182	1.09993
b3516	gadX	chr	-	3663008	3663833	-3.45974	-3.42683	-3.49399	-4.01339	-4.105	-4.3863	-3.90719	-4.39773	-3.28745	-3.44937	-4.11338	-4.0236	0.0215821	0.0461817	0.449582	0.50032	0.664007	0.0897763	1.58448	1.06421
b2304	yfcH	chr	+	2419729	2420623	-1.77129	-1.81393	-1.68941	-2.40978	-2.38678	-2.46978	-2.47066	-1.80345	-2.41042	-1.75096	-2.42334	-2.19606	0.000256547	0.00369356	0.459208	0.509889	0.672383	0.22728	1.5937	1.17063
b1249	cls	chr	-	1305208	1306669	-1.60516	-1.61208	-1.52374	-1.97886	-2.0921	-1.94889	-1.46324	-1.89598	-2.13728	-1.5786	-2.02727	-1.75057	0.00226283	0.0105292	0.471646	0.521895	0.44866	0.276695	1.36477	1.21142
b3178	hflB	chr	-	3323022	3324957	-0.811724	-0.785698	-0.799327	-1.24474	-1.33182	-1.36778	-1.28278	-1.28365	-1.28199	-0.796194	-1.3022	-1.28471	0.0037247	0.0140052	0.473676	0.52361	0.506007	0.0174883	1.42011	1.0122
b3773	ilvY	chr	-	3954949	3955843	-1.05247	-1.44904	-1.12271	-2.35875	-2.36059	-2.1285	-1.98311	-2.34256	-2.2117	-1.23706	-2.32182	-2.10894	0.00332158	0.0132241	0.475154	0.524466	1.08477	0.212883	2.12103	1.159
b3404	envZ	chr	-	3532537	3533890	-2.46689	-2.41079	-2.59548	-3.02033	-3.15217	-3.12577	-2.94043	-3.07849	-3.12125	-2.4985	-3.09647	-2.98218	0.00125502	0.00732831	0.484	0.532257	0.597966	0.114291	1.51358	1.08244
b2351	yfdH	chr	+	2466235	2467156	-0.912705	-0.779772	-0.879261	-0.346933	-0.453275	-0.276695	-0.528919	-0.684191	-0.214553	-0.848373	-0.384163	-0.566919	0.00197109	0.00952908	0.494889	0.541643	-0.464209	-0.182755	0.724868	0.881019
b2316	accD	chr	-	2431033	2431948	-0.586212	-0.649579	-0.601276	-0.376167	-0.437506	-0.480311	-0.44472	-0.419022	-0.53445	-0.613792	-0.425645	-0.446803	0.0110895	0.0289183	0.495081	0.541643	-0.188147	-0.0211574	0.877733	0.985442
b0226	dinJ	chr	-	246241	246502	-0.590063	-0.882798	-1.0132	-1.97978	-1.98036	-1.80687	-2.10636	-1.66077	-1.60429	-0.857844	-1.96447	-1.86025	0.00522803	0.0172224	0.501775	0.546557	1.10663	0.104225	2.15342	1.07492
b4220	ytfM	chr	+	4440404	4442138	-0.936882	-1.13947	-0.959131	-1.85343	-1.71519	-1.79428	-1.77113	-1.82068	-1.61139	-1.02006	-1.805	-1.74724	0.00119955	0.0071916	0.52243	0.566982	0.784943	0.0577553	1.72302	1.04085
b2796	sdaC	chr	+	2926250	2927540	0.606078	0.651132	0.576922	0.407124	0.509335	0.451626	0.49651	0.473387	0.458947	0.610421	0.461205	0.487239	0.0159894	0.0373092	0.574091	0.615865	0.149217	0.0260344	1.10897	1.01821
b0459	maa	chr	-	478590	479142	1.39249	1.34029	1.99976	0.344805	0.843282	0.0458152	0.893635	0.588423	0.15924	1.58141	0.467882	0.642712	0.0210096	0.0452093	0.68913	0.722615	1.11352	0.17483	2.16373	1.12883
b1363	trkG	chr	+	1421805	1423263	-2.9336	-2.43143	-2.60384	-1.37003	-1.6896	-1.22612	-3.14366	-2.21652	-0.116773	-2.64403	-1.49406	-2.33031	0.00370965	0.0140052	0.702231	0.733255	-1.14997	-0.836249	0.450635	0.560098
b1047	mdoC	chr	-	1107006	1108164	-1.78861	-1.79542	-1.75174	-0.129549	-0.134267	0.208651	-0.76549	-0.208255	0.537935	-1.7641	-0.0786404	-0.372112	0.00372338	0.0140052	0.773932	0.798604	-1.68546	-0.293472	0.310904	0.815936
Below are not significant in WT/M, but are significant in C/M
b1136	icd	chr	+	1194345	1195596	0.815584	0.665463	0.654534	0.563495	0.603243	0.61708	2.12831	2.2077	2.18741	0.703389	0.59311	2.16534	0.143231	0.189238	2.81426e-06	0.000299317
b3860	dsbA	chr	+	4041440	4042067	0.00982744	0.109282	0.0273508	0.102022	0.099898	0.14472	-0.53676	-0.502578	-0.483129	0.0538693	0.10605	-0.523637	0.148465	0.194943	8.71042e-06	0.000518793
b3703	rpmH	chr	+	3882358	3882499	-0.105004	0.0609468	-0.0516211	0.212688	0.167298	0.104447	-0.993393	-1.04714	-0.922651	-0.0247071	0.174258	-1.00081	0.0370926	0.0675195	2.07649e-05	0.000863387
b4032	malG	chr	-	4240648	4241539	-0.434718	-1.34446	-1.46347	-2.58645	-2.19456	-2.76598	2.50384	2.09082	1.98392	-1.21301	-2.44744	2.25769	0.0294454	0.0577657	3.55482e-05	0.00113634
b4201	priB	chr	+	4423542	4423857	-2.59027	-2.45439	-2.49057	-2.49909	-2.4196	-2.4392	-3.16017	-3.14417	-3.08444	-2.50573	-2.44629	-3.14113	0.292775	0.348172	3.45469e-05	0.00113634
b3185	rpmA	chr	-	3330883	3331141	0.0286793	0.0926314	-0.161304	0.0681831	0.115876	0.161785	-0.662012	-0.772411	-0.753861	-0.0217063	0.100234	-0.723376	0.227958	0.283094	6.08813e-05	0.00151087
b1778	msrB	chr	-	1860039	1860453	0.389037	0.187236	1.22029	-1.16957	-1.36128	-1.26802	0.343012	0.380945	0.574277	0.573985	-1.27808	0.372183	0.0246752	0.0508179	7.42293e-05	0.00158732
b0741	pal	chr	+	778289	778811	0.867292	0.829735	0.715728	0.877168	0.84873	0.875538	0.420135	0.368716	0.378022	0.798626	0.867033	0.393756	0.300148	0.354698	7.39636e-05	0.00158732
b3916	pfkA	chr	+	4105574	4106537	1.6204	1.40656	1.54932	1.76329	1.77929	1.87494	1.07177	1.07626	0.96834	1.51603	1.79037	1.07342	0.0278058	0.0554255	0.000101922	0.00185266
b4354	yjiY	chr	-	4587151	4589302	-4.67836	-4.38742	-4.74104	-4.62001	-4.76053	-5.07526	-1.51192	-1.59951	-2.00589	-4.60769	-4.74887	-1.61164	0.282386	0.339091	0.00011671	0.00202072
b2672	ygaM	chr	+	2798155	2798497	-0.968127	-0.819086	-1.65006	-1.89365	-2.02371	-1.89931	-1.06277	-1.19799	-1.09326	-1.21592	-1.95988	-1.11242	0.0863857	0.127355	0.000155737	0.00236624
b3151	yraQ	chr	-	3295119	3296160	-0.398671	-0.567728	-0.155786	-0.0222426	0.447636	0.252489	-2.05006	-2.50465	-2.26401	-0.378027	0.207503	-2.19276	0.0304187	0.0591298	0.000191668	0.0026183
b0755	gpmA	chr	-	786065	786818	1.29372	0.992218	1.13775	0.803703	0.90754	0.851801	1.43237	1.40126	1.52014	1.12149	0.85983	1.43638	0.0682046	0.104375	0.000251921	0.00307467
b3221	yhcH	chr	-	3367035	3367500	-0.63257	-1.12826	-0.943588	-0.890909	-0.771204	-1.27877	2.8946	2.22327	2.7959	-0.936925	-0.906624	2.61348	0.727358	0.760025	0.000261184	0.00313632
b0015	dnaJ	chr	+	14167	15298	-0.0360099	-0.121676	-0.101972	-0.356689	-0.435171	-0.21885	0.6765	0.752636	0.546966	-0.0955291	-0.37028	0.67504	0.0430371	0.07495	0.000340511	0.00351916
b3867	hemN	chr	+	4050067	4051441	-0.315831	-0.668575	-0.681992	-0.0622658	0.0807934	-0.177462	-1.37119	-1.12016	-1.20836	-0.583315	-0.00338032	-1.26073	0.0316898	0.0608388	0.000354805	0.00355484
b2158	yeiH	chr	+	2247738	2248788	-1.29569	-0.813061	-0.964998	-0.671608	-0.590827	-0.593477	-1.41494	-1.56935	-1.53488	-1.02257	-0.615836	-1.51486	0.0996206	0.142767	0.000355723	0.00355484
b0781	moaA	chr	+	816266	817256	-2.01112	-2.40783	-2.06975	-1.74579	-2.04489	-2.08606	-3.49634	-3.49271	-3.79667	-2.18171	-1.94585	-3.56382	0.28186	0.339006	0.000379607	0.00374328
b0115	aceF	chr	+	125694	127587	1.61472	1.37952	1.56739	1.86448	1.86044	1.55595	0.397191	0.303383	0.147903	1.50908	1.80551	0.324566	0.135452	0.180401	0.000518778	0.0045769
b1200	dhaK	chr	-	1248990	1250061	-0.127411	0.242874	-0.185895	-0.185118	-0.530655	-0.0686679	1.69286	1.99684	1.76715	-0.0160023	-0.332409	1.80847	0.28518	0.341607	0.000525874	0.0045769
b3298	rpsM	chr	-	3440136	3440493	0.621695	0.637544	0.643525	0.605826	0.629283	0.678617	0.108504	0.0912068	0.117294	0.636069	0.627993	0.103083	0.88341	0.900341	0.000539818	0.0045769
b0807	ybiN	chr	+	841554	842481	-0.331595	-0.12517	-0.856695	0.865019	0.659753	0.75506	-1.13401	-0.77871	-0.90685	-0.509837	0.75537	-1.00716	0.0248795	0.0511679	0.00055358	0.00457934
b1174	minE	chr	-	1223501	1223768	-0.871671	-0.679841	-0.105812	-0.769145	-0.673155	-0.54127	0.31164	0.376708	0.148646	-0.532503	-0.678978	0.275365	0.688518	0.725551	0.000579418	0.0047145
b2231	gyrA	chr	-	2334814	2337442	0.071733	0.0742619	0.0327411	0.172215	0.329363	0.216776	-0.437388	-0.327675	-0.42848	0.0558859	0.253159	-0.392767	0.0520818	0.0852196	0.000593819	0.00477944
b2679	proX	chr	+	2805153	2806146	1.00054	1.31374	1.39114	0.697506	0.813137	0.624356	1.79894	1.95639	1.67703	1.25457	0.726458	1.83571	0.0319335	0.0610713	0.000695466	0.00506721
b3908	sodA	chr	+	4098832	4099453	1.52862	1.76398	1.75104	1.38256	1.32118	1.60219	2.57475	2.75368	2.68376	1.69607	1.39224	2.6426	0.0990752	0.142259	0.000697635	0.00506721
b3926	glpK	chr	-	4113736	4115245	1.05104	1.00713	1.04023	0.658312	0.704202	0.866308	2.3375	2.35744	2.29448	1.03115	0.715117	2.34201	0.0393369	0.0704845	0.000729343	0.00527181
b3416	malQ	chr	-	3546007	3548092	-0.485857	-1.10447	-0.771566	-1.63466	-1.7846	-1.43755	0.702545	0.904288	0.32798	-0.822316	-1.67398	0.709112	0.0246285	0.0507921	0.000944492	0.00621919
b2702	srlA	chr	+	2823853	2824417	0.649786	0.573598	1.07628	0.490677	0.585526	0.411144	3.53225	4.01561	3.57383	0.776642	0.507063	3.68362	0.219628	0.273891	0.000984283	0.00639999
b3306	rpsH	chr	-	3444174	3444567	1.34577	1.41896	1.33162	1.44732	1.38201	1.44076	0.979946	0.853449	0.930404	1.37291	1.41455	0.930918	0.169581	0.21881	0.0010031	0.00643799
b3770	ilvE	chr	+	3950506	3951436	0.932458	0.0318928	0.0591265	-0.474831	-0.573312	-0.459506	0.630385	0.431749	0.415079	0.225572	-0.516206	0.51797	0.10199	0.145185	0.00104381	0.00658571
b1777	yeaC	chr	-	1859725	1859998	0.367638	0.512572	-0.558587	-1.53456	-1.22437	-1.18367	0.0169904	-0.20979	0.147916	-0.0106199	-1.32986	-0.0633262	0.0404813	0.0719291	0.00105203	0.0066096
b3310	rplN	chr	-	3445799	3446171	0.311276	0.353475	0.437904	0.347273	0.415494	0.547182	-0.30846	-0.31438	-0.198719	0.373302	0.414958	-0.302257	0.385657	0.439696	0.00113934	0.00703931
b3232	yhcM	chr	-	3376891	3378019	-1.86008	-1.13364	-1.33147	-2.23366	-2.24467	-2.05497	-1.42352	-1.23473	-1.47801	-1.41988	-2.20325	-1.3914	0.0673761	0.103426	0.00130415	0.00786185
b1049	mdoH	chr	+	1110085	1112629	-0.843526	-0.844022	-0.893776	-0.787551	-0.574096	-0.511827	-1.5758	-1.58598	-1.73031	-0.870581	-0.636971	-1.62932	0.100446	0.143536	0.00131681	0.00789223
b3985	rplJ	chr	+	4178018	4178516	-0.0238139	-0.0277832	-0.0335889	-0.0541842	-0.0205512	0.133771	-1.02384	-1.04709	-1.08679	-0.0249653	-0.00890754	-1.04144	0.493578	0.545611	0.00134487	0.00794039
b2182	bcr	chr	-	2276591	2277782	-2.04287	-1.79929	-1.71164	-1.66379	-1.78049	-1.47483	-2.49801	-2.61209	-2.80215	-1.83029	-1.67984	-2.64721	0.188271	0.238496	0.00136403	0.00796485
b3169	nusA	chr	-	3314060	3315548	1.01834	1.22144	1.35723	1.58774	1.64711	1.46064	0.894093	0.81424	0.818043	1.21205	1.58694	0.851086	0.0446815	0.0772715	0.00162391	0.00915911
b0902	pflA	chr	-	949562	950303	1.13527	1.47813	0.991591	1.43692	1.68105	1.32887	-0.286954	0.173269	-0.2808	1.17742	1.51358	-0.140508	0.19697	0.248114	0.00162204	0.00915911
b3308	rplE	chr	-	3444920	3445460	1.47952	1.47686	1.41051	1.63037	1.54416	1.66192	1.00625	0.977997	0.978697	1.452	1.59552	0.989538	0.0266692	0.0538081	0.00185796	0.0100969
b2143	cdd	chr	+	2229865	2230750	0.757288	0.337996	-0.0981985	-0.300094	-0.0211863	-0.15313	0.986156	0.758342	0.655393	0.21884	-0.158576	0.848334	0.177043	0.22667	0.0018858	0.0101737
b2905	gcvT	chr	-	3047594	3048689	1.02058	1.12335	0.80501	0.982225	0.714735	0.709914	1.99211	1.72236	1.66806	0.962683	0.808371	1.83504	0.236963	0.292811	0.00189299	0.0101757
b0628	lipA	chr	-	658473	659439	0.584032	0.53745	0.534584	1.13234	0.878392	1.19502	0.010577	0.187342	-0.00515896	0.552427	1.02439	0.0702212	0.0305247	0.0592586	0.00191423	0.0102057
b3309	rplX	chr	-	3445474	3445789	0.610079	0.649153	0.631897	0.954584	0.849375	1.07207	0.35167	0.180078	0.383365	0.63593	0.923793	0.286733	0.0330057	0.0626855	0.00192228	0.0102057
b0635	mrdA	chr	-	665538	667440	-2.17661	-2.46416	-2.53119	-1.83899	-1.8746	-2.16058	-3.09373	-2.88144	-3.27803	-2.41208	-1.93405	-3.10525	0.0441657	0.0766359	0.00192599	0.0102057
b2913	serA	chr	-	3055199	3056432	-1.66551	-1.76679	-1.68923	-2.14007	-2.28933	-1.91852	-0.931663	-1.1002	-0.902233	-1.71184	-2.17338	-1.01705	0.053738	0.087449	0.00215306	0.0110784
b3168	infB	chr	-	3311363	3314036	0.882752	0.856693	0.813514	1.07679	1.09106	0.899563	0.404495	0.489264	0.262045	0.850709	1.05044	0.416006	0.0966525	0.139318	0.0021874	0.0110784
b2343	yfcZ	chr	-	2458671	2458956	-0.527073	-0.584251	-0.45818	-0.141054	-0.199571	0.23688	-1.43079	-1.64154	-1.62886	-0.521973	-0.105557	-1.53881	0.0617141	0.0965255	0.00230971	0.0113879
b0782	moaB	chr	+	817277	817790	1.25884	1.42066	1.46655	1.39294	1.63493	1.46441	0.523093	0.575726	0.620888	1.40446	1.51072	0.56293	0.294478	0.349106	0.00238348	0.0115227
b2234	nrdA	chr	+	2342886	2345172	0.631197	0.588999	0.487553	0.78747	0.823812	1.03927	0.0575485	0.0635876	-0.244318	0.559168	0.849999	0.0131708	0.0373875	0.0678902	0.00249102	0.0117928
b2156	lysP	chr	-	2245084	2246554	-0.961168	-0.918879	-0.82284	-0.314252	-0.574935	-0.672874	-1.79568	-1.51432	-1.42002	-0.893972	-0.494735	-1.6512	0.0563306	0.0904142	0.00248132	0.0117928
b0759	galE	chr	-	790261	791278	0.851019	0.578589	1.0145	0.457631	0.731333	0.74525	1.60626	1.77691	2.046	0.805528	0.627026	1.71556	0.347254	0.402696	0.00255576	0.0118863
b1476	fdnI	chr	+	1549361	1550015	-1.26559	-1.66387	-1.57067	-1.07327	-0.631256	-0.511827	-2.54184	-2.17969	-2.3796	-1.54356	-0.750544	-2.39717	0.0263032	0.0532863	0.00266182	0.0120837
b3887	dtd	chr	+	4075037	4075475	-0.424704	-1.11673	-1.07514	-1.81023	-1.70101	-2.08862	-0.531957	-0.145814	-0.677603	-0.94785	-1.80441	-0.414096	0.0291865	0.0573334	0.00275434	0.012296
b1822	rrmA	chr	-	1904274	1905084	0.563993	-0.27555	-0.315195	0.399279	0.716348	0.712126	-0.617865	-0.730777	-0.591808	-0.134554	0.587924	-0.643982	0.152928	0.200096	0.00274221	0.012296
b0889	lrp	chr	+	931817	932312	-1.63562	-1.81697	-1.81313	-2.32481	-2.08247	-1.95295	-1.19386	-1.2271	-0.880697	-1.7733	-2.15173	-1.1484	0.0582518	0.0926676	0.00277294	0.0123251
b3356	yhfA	chr	-	3483435	3483840	-0.00966691	-0.577378	-0.90082	-1.11036	-0.985182	-1.29975	-0.347672	-0.160949	-0.284217	-0.570763	-1.07637	-0.265474	0.122754	0.167229	0.00279627	0.012355
b3778	rep	chr	+	3958699	3960721	-1.32651	-1.36856	-1.62564	-1.42883	-1.3586	-1.34323	-1.85173	-1.88492	-2.02233	-1.45042	-1.37359	-1.89109	0.573073	0.624675	0.00280969	0.0123776
b3098	yqjD	chr	+	3247396	3247702	0.529986	0.926733	1.37792	0.0294987	0.14637	-0.10501	1.02332	1.1633	0.79359	0.964272	0.0715494	1.02958	0.054078	0.0878105	0.00285515	0.0125276
b1413	hrpA	chr	+	1481084	1484987	-1.08914	-0.969605	-1.13229	-0.909768	-0.979253	-0.882164	-1.69151	-1.52273	-1.49904	-1.06495	-0.939754	-1.54414	0.0831941	0.123849	0.00286142	0.0125276
b3385	gph	chr	-	3511652	3512411	0.13474	-0.18594	0.00642616	0.0864305	0.38796	0.265234	-0.416781	-0.654543	-0.454975	-0.0393833	0.241593	-0.528396	0.11059	0.155494	0.00301856	0.0128729
b3234	degQ	chr	+	3378764	3380132	0.0219502	0.814215	0.706183	-0.129989	-0.325166	-0.280096	0.634328	0.364962	0.63157	0.531885	-0.251332	0.554693	0.0850139	0.125831	0.00310813	0.0131105
b1865	nudB	chr	-	1946203	1946656	-2.34327	-2.34933	-2.49561	-2.32481	-2.63595	-2.19212	-3.8488	-3.66712	-3.83285	-2.4212	-2.44937	-3.74951	0.939381	0.948297	0.00328263	0.0136279
b3730	glmU	chr	-	3911852	3913223	-1.09407	-0.997733	-0.805027	-0.6856	-0.608995	-0.703573	-1.2728	-1.08553	-1.20079	-0.951326	-0.64874	-1.20127	0.0593924	0.0939646	0.00330882	0.0136857
b0812	dps	chr	-	847630	848134	0.14835	0.0582095	0.060828	-0.0939909	-0.189206	0.0465912	0.562612	0.516913	0.383006	0.0779971	-0.11763	0.534541	0.118792	0.163476	0.00347824	0.0141893
b2802	fucI	chr	+	2933605	2935381	0.782032	1.1034	0.995258	0.221256	0.540779	0.729181	1.66202	2.05478	1.56811	0.97358	0.446527	1.77617	0.0685767	0.104729	0.00384688	0.0151937
b0448	mdlA	chr	+	468094	469867	-3.11327	-3.58245	-3.45304	-2.92371	-2.39292	-2.80461	-4.22136	-3.99967	-3.83974	-3.40952	-2.65715	-4.05877	0.0347372	0.0648167	0.00387029	0.0152457
b3552	yiaD	chr	+	3714569	3715229	1.02421	1.27045	1.5498	1.67414	2.11435	1.74299	0.917455	0.739067	0.570472	1.29427	1.87431	0.791731	0.0518659	0.0849596	0.00388833	0.0152763
b1276	acnA	chr	+	1333854	1336530	-0.0852929	-0.0618848	-0.097378	-0.501683	-0.865007	-0.321276	0.737336	0.808296	1.02756	-0.09862	-0.644925	0.825399	0.0943491	0.136737	0.00392297	0.0153315
b2914	rpiA	chr	-	3056687	3057347	0.885853	1.20219	1.46784	1.4434	1.56633	1.53654	1.08892	0.968777	0.870477	1.20393	1.51782	1.02532	0.184004	0.234044	0.00400685	0.015537
b2262	menB	chr	-	2373983	2374841	1.25688	1.66597	1.34857	2.02405	1.95476	1.8258	0.749856	0.949597	0.515107	1.42187	1.96128	0.773773	0.0367962	0.0673613	0.0041149	0.0157914
b2147	yeiA	chr	+	2233286	2234522	-0.0798499	-1.86994	-0.300222	-1.5378	-1.53504	-1.41054	1.21659	0.766274	1.43893	-1.01685	-1.51923	1.05023	0.317186	0.372468	0.00415514	0.0159049
b0480	ushA	chr	+	504137	505790	0.220116	0.934596	1.09106	-0.255507	-0.0285319	0.0559265	0.66747	0.82267	0.663466	0.765773	-0.0983736	0.736899	0.0784361	0.118932	0.00422672	0.0160551
b3704	rnpA	chr	+	3882515	3882875	-2.31072	-2.4098	-2.34565	-1.90977	-1.74131	-1.468	-3.49063	-3.46214	-3.53488	-2.3786	-1.75616	-3.52214	0.0319506	0.0610713	0.00426698	0.0161667
b3810	yigA	chr	+	3993605	3994313	-1.33329	-1.66086	-1.9092	-2.06055	-2.0521	-1.81773	-1.18609	-1.37841	-1.4387	-1.68639	-2.00823	-1.32591	0.165298	0.214212	0.00433296	0.0162924
b0026	ileS	chr	+	22390	25207	0.432796	0.424601	0.614324	0.605658	0.489252	0.398228	0.117907	0.0110738	-0.026404	0.497745	0.514719	0.0567726	0.938007	0.948196	0.00453222	0.0167041
b2324	mnmC	chr	+	2439785	2441792	-0.972896	-0.451463	-0.490886	-0.258842	-0.478646	-0.362807	-1.03021	-1.06203	-1.33981	-0.61988	-0.38226	-1.08415	0.24174	0.297726	0.00456228	0.0167246
b3744	asnA	chr	+	3925177	3926170	-2.59178	-2.57816	-2.12024	-2.82928	-2.49111	-2.6763	-1.88013	-1.41867	-1.59296	-2.40706	-2.63975	-1.54788	0.279796	0.337341	0.00456934	0.0167246
b0506	allR	chr	+	532234	533050	-1.35161	-1.12167	-1.01532	-1.72863	-1.73375	-1.73648	-0.444087	-0.422414	-0.147669	-1.15172	-1.73153	-0.397616	0.0289347	0.0569139	0.00462554	0.0167953
b3251	mreB	chr	-	3398065	3399109	0.26902	0.293772	0.371383	0.652542	0.837514	0.539671	0.0354388	-0.0910713	-0.323581	0.311048	0.710523	-0.0770239	0.0399043	0.0711587	0.00463798	0.0167953
b0735	ybgE	chr	+	773531	773825	-0.661567	-0.950893	-0.940874	-0.488925	-0.427281	-0.525342	-2.57552	-2.90725	-3.20058	-0.879578	-0.463901	-2.83502	0.0496505	0.0826652	0.00468861	0.0168631
b4484	cpxP	chr	+	4103842	4104343	-3.41853	-3.74244	-3.85996	-4.12767	-3.66057	-3.33739	-2.0329	-1.59013	-1.79621	-3.67697	-3.75937	-1.84193	0.90297	0.917763	0.00468171	0.0168631
b2069	yegD	chr	+	2145697	2147050	-0.59195	-0.72647	-0.213049	0.242235	1.04541	0.320296	-1.19677	-1.22143	-1.91892	-0.505395	0.594772	-1.34863	0.034107	0.0642853	0.00480561	0.017046
b0416	nusB	chr	+	434360	434780	0.251596	0.243534	0.0777007	0.991454	0.513624	0.730812	-0.654689	-0.518718	-0.69123	0.175847	0.71983	-0.623464	0.0416945	0.0733844	0.00488827	0.017046
b1330	ynaI	chr	-	1392914	1393946	-0.713801	-0.47013	-0.116393	-0.420383	-0.401425	-0.0748601	-1.62863	-1.19799	-1.22128	-0.41441	-0.359342	-1.40455	0.555845	0.607675	0.0048807	0.017046
b2904	gcvH	chr	-	3047181	3047571	1.19289	1.04993	1.11131	1.15761	1.11352	1.04784	1.87535	1.96146	1.69801	1.1083	1.1153	1.87446	0.834235	0.857264	0.00486849	0.017046
b2786	barA	chr	+	2913078	2915835	-1.44663	-1.58653	-1.44921	-1.4053	-1.47733	-1.57456	-2.00449	-2.21232	-2.29018	-1.51194	-1.46329	-2.12736	0.906853	0.920452	0.00498698	0.0172288
b1092	fabD	chr	+	1148950	1149880	1.17363	1.1375	0.974875	1.28754	1.37411	1.33657	0.708323	0.796506	0.56988	1.07814	1.33582	0.712877	0.0449746	0.0774954	0.00510992	0.0175315
b4177	purA	chr	+	4402709	4404008	0.423861	0.443088	0.561559	0.523298	0.647619	0.488927	0.0718398	0.0655011	0.122766	0.482526	0.57381	0.0872279	0.299518	0.354235	0.00523182	0.017705
b1308	pspE	chr	+	1367712	1368027	-0.383182	0.216698	0.254012	-0.790897	-0.757329	-0.784875	0.361257	0.264233	0.0922254	0.0534691	-0.786961	0.272617	0.059328	0.0939646	0.00529169	0.0178265
b1632	rsxE	chr	+	1708851	1709547	0.0210467	0.512572	0.309259	1.49395	1.29512	0.691707	-0.239705	-0.809243	-0.754846	0.280596	1.23344	-0.54343	0.0464858	0.0793777	0.0053917	0.018041
b3387	dam	chr	-	3513098	3513935	-2.62634	-2.38192	-2.51073	-2.05094	-2.24399	-2.32002	-3.05562	-3.02864	-3.10479	-2.4978	-2.19767	-3.04588	0.0485642	0.0816163	0.00556796	0.018506
b4280	yjhC	chr	+	4503309	4504428	0.208851	0.142838	0.327884	-0.15011	-0.369816	0.136165	1.3969	1.46472	1.52314	0.225763	-0.206999	1.43271	0.124034	0.168202	0.0058788	0.0191543
b1069	yceN	chr	+	1127061	1128597	-1.29291	-0.974675	-1.08312	-1.04874	-0.647739	-0.804724	-1.81527	-1.7123	-1.89844	-1.09738	-0.835878	-1.80049	0.134441	0.179537	0.00590776	0.0192067
b3368	cysG	chr	+	3495849	3497223	-1.20184	-1.5155	-0.957603	-0.772264	-1.01409	-0.727333	-1.70687	-1.48182	-1.90685	-1.24516	-0.879194	-1.68068	0.123345	0.16788	0.00625328	0.0200126
b0949	uup	chr	+	1009186	1011094	-0.279872	-0.363097	-0.426196	-0.0605571	0.218851	-0.238901	-0.925622	-0.807717	-1.22426	-0.366453	0.0244233	-0.941264	0.121243	0.165929	0.00630064	0.0200463
b0184	dnaE	chr	+	205125	208608	-2.57832	-2.60978	-2.72819	-2.2855	-2.40215	-2.56796	-2.93582	-3.10276	-3.28287	-2.64823	-2.39	-3.03338	0.0968398	0.139453	0.00669186	0.0209332
b0758	galT	chr	-	789205	790252	0.896797	0.922373	0.455055	0.18512	0.294926	0.00602159	2.3204	2.52355	1.75422	0.704296	0.180402	2.27619	0.0388381	0.069843	0.00673788	0.020951
b2318	truA	chr	-	2432845	2433658	-2.17485	-1.77999	-2.04766	-1.53027	-1.27441	-1.58845	-2.43108	-2.68025	-2.19285	-1.9997	-1.42454	-2.47248	0.0251881	0.0516598	0.00677495	0.0209728
b2936	yggG	chr	+	3079934	3080693	0.438041	0.347219	0.845469	-0.293911	-0.274095	-0.289927	0.527986	0.416236	0.31876	0.538734	-0.28232	0.466338	0.0322856	0.0614747	0.00679235	0.020983
b0369	hemB	chr	-	387976	388951	1.37777	1.0866	1.19946	1.47311	1.2649	1.22401	0.842301	0.738581	0.539113	1.19182	1.3341	0.751941	0.435085	0.488937	0.00681193	0.0209999
b2319	usg	chr	-	2433657	2434671	1.36259	1.59008	1.55242	2.20453	2.53916	1.94206	0.909478	0.903567	1.22661	1.50804	2.29591	0.937441	0.0374899	0.0679933	0.00688395	0.0210005
b0183	rnhB	chr	+	204492	205089	-0.434089	-0.941908	-1.65955	-0.229046	0.128437	-0.239046	-1.24542	-1.9569	-1.77133	-1.16763	-0.0606238	-1.63079	0.115494	0.159824	0.00684896	0.0210005
b0773	ybhB	chr	-	806655	807132	-0.69645	-0.216733	-0.830932	-0.841791	-1.33675	-0.871723	0.0128026	-0.0532031	0.300002	-0.613321	-1.09063	0.0599807	0.152836	0.200096	0.0068605	0.0210005
b3816	corA	chr	+	3999448	4000399	0.059324	-0.015781	0.181947	0.25329	0.491582	0.255983	-0.139635	-0.302377	-0.4626	0.0853082	0.362282	-0.242661	0.0629089	0.0982911	0.00701677	0.0212357
b1204	pth	chr	-	1257151	1257736	0.894084	0.773057	0.375283	1.15828	0.845869	1.36774	0.213768	-0.0166348	-0.06928	0.629798	1.04598	0.0844534	0.111993	0.157022	0.00711006	0.0214744
b3859	rdoA	chr	+	4040437	4041424	-2.33608	-2.52804	-2.21315	-2.12908	-2.00827	-2.11167	-2.61931	-2.42761	-2.44999	-2.35359	-2.04884	-2.57306	0.0787266	0.11913	0.00733522	0.0220649
b1451	yncD	chr	-	1518986	1521089	-1.328	-0.71955	-1.18175	-1.42038	-1.5362	-1.64933	-0.669954	-0.700598	-1.00873	-1.06386	-1.50729	-0.761522	0.116803	0.161335	0.00750714	0.0224912
b1224	narG	chr	+	1279086	1282830	0.985256	0.966423	0.934521	2.09644	1.44647	2.56909	-1.52806	-1.40421	-1.54213	0.955607	1.84452	-1.49695	0.0803629	0.120991	0.00754341	0.0225298
b2206	napA	chr	-	2298288	2300775	0.0129641	-0.15273	0.061936	-0.185402	0.564698	0.951574	-1.95863	-2.09908	-2.44796	-0.030105	0.33252	-2.11495	0.293222	0.348172	0.00755029	0.0225298
b0785	moaE	chr	+	818517	818970	-0.1105	-0.204028	-0.191536	0.503308	0.0214319	0.89499	-1.39568	-1.45979	-1.74179	-0.188011	0.328233	-1.48982	0.124353	0.168329	0.0075759	0.022561
b2614	grpE	chr	-	2748136	2748730	-0.359789	-0.0552135	-0.213294	-0.463289	-0.379585	-0.479028	0.615229	0.459634	0.858614	-0.202264	-0.426395	0.596354	0.106751	0.151384	0.00783725	0.0231541
b1206	ychM	chr	-	1258346	1260026	-0.430663	-0.48867	-0.219175	0.749195	0.916404	0.0804038	-1.34455	-0.678116	-1.20541	-0.374797	0.699489	-1.08029	0.0527113	0.0860605	0.00806365	0.0234507
b1863	ruvC	chr	-	1944878	1945400	-2.69823	-2.99752	-3.00265	-2.80837	-2.4536	-3.10654	-3.81947	-3.96933	-4.26942	-2.90955	-2.66976	-3.96068	0.642055	0.684828	0.00805552	0.0234507
b0268	yagE	chr	+	281480	282410	-0.803042	-1.2541	-0.653341	-1.28258	-1.53766	-1.2801	1.3204	0.862134	0.417367	-0.927395	-1.40815	0.976352	0.107657	0.152522	0.00811738	0.0235151
b3930	menA	chr	-	4117445	4118372	-0.239993	0.184086	-0.106339	0.509517	0.132056	0.35067	-0.568633	-0.338563	-0.2519	-0.0486142	0.310383	-0.426544	0.0827932	0.123427	0.00813487	0.02352
b2585	pssA	chr	+	2720748	2722104	-0.82771	-1.02224	-1.02344	-0.866613	-0.850014	-0.785144	-1.3884	-1.45474	-1.23425	-0.968056	-0.844777	-1.40403	0.188362	0.238496	0.00818676	0.0235785
b0827	moeA	chr	-	864351	865587	1.81208	1.83453	1.81293	2.44688	2.018	2.54983	1.40592	1.0617	1.33998	1.81551	2.25875	1.27526	0.085833	0.126665	0.00821966	0.0236275
b3493	pitA	chr	+	3635664	3637164	-0.930077	-0.820596	-0.979198	-0.843828	-0.67655	-0.897757	-1.89123	-1.81994	-2.33653	-0.911585	-0.777108	-1.94279	0.278235	0.336003	0.00902097	0.0253438
b3179	rrmJ	chr	-	3325056	3325686	-2.40498	-2.42261	-2.22162	-2.40154	-2.77949	-2.70977	-1.78652	-1.84382	-2.07851	-2.35027	-2.64224	-1.85983	0.121428	0.166029	0.00904764	0.0253709
b2994	hybC	chr	-	3139307	3141011	0.352654	-0.0731057	-0.537848	-0.594566	-0.34997	-0.327402	-0.00275171	0.106208	0.227006	-0.202972	-0.431754	0.0822931	0.318893	0.373883	0.00915148	0.0255658
b0932	pepN	chr	+	989844	992457	0.976615	1.07388	0.865253	0.537662	0.737373	0.319675	1.33844	1.32021	1.49672	0.964816	0.582729	1.35188	0.0483005	0.0813569	0.0091736	0.0255796
b0887	cydD	chr	-	928418	930185	-0.562507	-0.753548	-0.242605	-0.211691	0.290037	-0.0812416	-0.959662	-0.722828	-1.17712	-0.523778	0.0338844	-0.891684	0.0704529	0.107045	0.00922201	0.0256245
b2344	fadL	chr	+	2459327	2460668	1.45048	1.64166	1.23958	1.66064	1.65979	1.94116	0.764184	0.77483	1.18061	1.42129	1.70968	0.803226	0.109404	0.154388	0.00964977	0.0265592
b0143	pcnB	chr	-	157728	159126	-1.41049	-1.4746	-1.23483	-0.472835	-0.558787	-0.993285	-1.95553	-1.91419	-2.07777	-1.37342	-0.615427	-1.98102	0.0334014	0.0633562	0.00977058	0.0268334
b1215	kdsA	chr	+	1267387	1268242	1.60813	1.80312	1.81518	2.14904	1.94506	2.25914	1.5081	1.08276	1.06829	1.75033	2.07321	1.28295	0.0342236	0.0644234	0.00979661	0.0268334
b3936	rpmE	chr	+	4125035	4125248	1.731	1.91797	1.72207	1.86942	2.10598	2.25972	0.937497	0.954535	0.955527	1.77846	2.04227	0.946006	0.109671	0.154494	0.00980677	0.0268334
b3068	mug	chr	-	3212988	3213495	0.330441	-0.0909872	-0.210732	-0.270358	-0.703601	-0.73506	0.165671	0.330904	0.643348	-0.0666876	-0.557724	0.323033	0.0601697	0.094807	0.00992684	0.0269412
b2895	fldB	chr	+	3037876	3038398	-0.487818	-0.344989	-0.251821	-0.17693	-0.0483971	-0.115156	-0.758505	-0.491902	-0.627777	-0.338705	-0.113973	-0.635802	0.0483817	0.0814016	0.0103891	0.0277727
b1871	cmoB	chr	+	1951465	1952437	-0.568964	-0.834955	-0.964349	-0.503448	-0.0748191	-0.284333	-1.04696	-1.23567	-1.12682	-0.821615	-0.25522	-1.11435	0.0419808	0.0735405	0.0104991	0.0280163
b0315	yahA	chr	+	331594	332683	-1.53023	-1.28432	-1.25671	-0.412268	-0.923543	-0.850964	-1.78014	-1.9654	-1.44345	-1.33114	-0.739126	-1.78428	0.0389847	0.0700221	0.0106421	0.0282724
b1177	ycgJ	chr	+	1225822	1226191	0.0503668	0.10193	-0.48454	-0.968662	-0.257735	-0.401403	0.863327	0.973643	0.415079	-0.206189	-0.55629	0.800904	0.208054	0.261208	0.0107279	0.0284233
b1633	nth	chr	+	1709546	1710182	-0.927508	-0.796148	-0.90392	0.0632651	0.682022	0.0876354	-0.867193	-1.1939	-0.805312	-0.878128	0.322673	-1.05121	0.0256406	0.0523716	0.0109671	0.0288799
b0222	lpcA	chr	+	243542	244121	1.30868	1.28487	1.23096	0.987934	0.814648	0.657057	1.5586	1.5957	1.64169	1.27078	0.838757	1.57835	0.0352941	0.0653739	0.0109779	0.0288799
b0336	codB	chr	+	354145	355405	0.454127	0.427046	0.293476	1.56764	2.28083	2.75155	-0.0442283	0.698636	-0.138489	0.379949	2.04653	0.170849	0.0321286	0.0612872	0.0110772	0.0290387
b3114	tdcE	chr	-	3258145	3260440	-0.485613	-0.444576	-0.0410037	-0.678442	-0.507697	-0.783631	1.92689	2.04422	3.0615	-0.311038	-0.619688	2.09253	0.129112	0.173823	0.0111198	0.0290992
b0606	ahpF	chr	+	638975	640541	0.536698	0.467992	0.669366	0.451615	0.330848	0.214547	0.919175	0.88608	0.862721	0.561847	0.351782	0.910901	0.0683912	0.104553	0.011307	0.0293311
b2294	yfbU	chr	-	2410121	2410616	0.825178	1.3393	0.890557	0.952304	0.89804	0.897932	1.88272	1.64532	2.01145	1.01147	0.924048	1.81885	0.592296	0.640471	0.0112876	0.0293311
b2265	menF	chr	-	2377369	2378665	-0.793448	-1.11766	-1.21996	-0.809308	-1.03268	-1.00722	-2.10005	-1.60642	-1.92703	-1.05634	-0.952757	-1.89346	0.56594	0.617804	0.0113424	0.029372
b3259	prmA	chr	+	3407091	3407973	1.26891	0.963131	0.626667	1.44938	1.2766	1.9476	0.0568578	0.35434	0.263075	0.881891	1.44734	0.224923	0.0919634	0.133594	0.0116051	0.0298961
b2746	ispF	chr	-	2869322	2869802	1.16888	1.25601	1.12119	1.60617	1.52341	1.32296	0.775264	0.805328	0.370899	1.16794	1.51019	0.717643	0.0511899	0.0841299	0.0117067	0.030054
b3167	rbfA	chr	-	3310798	3311200	1.92008	1.99752	0.947571	1.40218	1.43788	1.35259	1.87514	2.0421	1.80204	1.47285	1.40952	1.92624	0.5755	0.626403	0.0117781	0.0301334
b0181	lpxA	chr	+	202559	203348	-2.3284	-2.25201	-2.48989	-2.04508	-1.8914	-2.24706	-2.9254	-2.88062	-2.84113	-2.35705	-2.01003	-2.88614	0.0853339	0.126054	0.0118904	0.030213
b1636	pdxY	chr	-	1713049	1713913	1.3161	0.812722	0.840669	1.23788	1.49287	1.33448	0.735962	0.755219	0.795536	0.934004	1.36695	0.768884	0.141338	0.187235	0.0118891	0.030213
b3340	fusA	chr	-	3469421	3471536	0.69075	0.708306	0.668925	0.731017	0.737784	0.753659	0.151485	0.173234	0.339302	0.690298	0.737632	0.18567	0.0261202	0.0529877	0.0119768	0.0303289
b0870	ltaE	chr	-	907515	908517	0.299259	0.0747732	-0.601139	-0.70673	-0.732769	-0.604242	0.13594	-0.0656372	0.33114	-0.183954	-0.703395	0.119807	0.152041	0.199286	0.0121244	0.0304225
b1827	kdgR	chr	-	1907331	1908123	-0.392139	-0.523137	-0.821107	-0.456595	-0.40431	-0.258009	-0.891993	-0.75121	-1.06813	-0.628052	-0.398434	-0.839708	0.243241	0.298587	0.0121363	0.0304225
b2834	tas	chr	+	2969618	2970659	0.305402	-0.177153	0.322845	-0.242531	-0.448791	-0.767975	0.574554	0.393009	1.07666	0.142037	-0.448343	0.569769	0.0470328	0.0800364	0.0122302	0.0305879
b3181	greA	chr	-	3326260	3326737	0.508189	0.249604	0.257094	0.988838	0.728217	0.562906	-0.157626	-0.220119	-0.0925641	0.323714	0.787919	-0.162689	0.0558352	0.0899768	0.0123173	0.0306619
b2708	gutQ	chr	+	2827834	2828800	-0.547071	-0.0377098	-0.221369	-0.640735	0.101309	-0.348161	1.06152	1.5958	0.750409	-0.259606	-0.269571	1.17263	0.923118	0.935686	0.0124782	0.0309668
b2497	uraA	chr	-	2616892	2618182	0.866337	0.788866	0.894386	1.22751	1.68529	2.21966	-0.00675364	-0.389702	-0.0459452	0.848225	1.57079	-0.15404	0.0935646	0.135787	0.0126458	0.0312487
b1193	emtA	chr	+	1242402	1243014	-0.545526	-0.206048	0.0161113	-0.0853395	0.201099	-0.129073	-0.946656	-0.815402	-0.500425	-0.225638	0.0271049	-0.87133	0.292413	0.348043	0.0126758	0.0312487
b0633	rlpA	chr	-	663324	664413	0.277938	0.153624	-0.0144125	0.512344	0.173903	0.454292	-0.352275	-0.444159	-0.407748	0.116138	0.344482	-0.37811	0.150562	0.197521	0.0131324	0.0322145
b3091	uxaA	chr	-	3239848	3241336	-1.33088	-1.75889	-1.28191	-3.06177	-2.32712	-1.93563	-0.261326	-0.829743	-0.387475	-1.46309	-2.5127	-0.497711	0.0786708	0.11913	0.0134096	0.0327863
b2747	ispD	chr	-	2869801	2870512	-1.18932	-1.72927	-1.31924	-0.952472	-0.773736	-0.234293	-1.97241	-1.54226	-2.26942	-1.46372	-0.778778	-1.89898	0.0526309	0.0860236	0.0134758	0.0327994
b2530	iscS	chr	-	2658338	2659553	1.62244	1.63525	1.93542	2.03879	2.06569	1.87119	1.48643	1.49772	1.47607	1.74006	2.01915	1.48353	0.108886	0.154049	0.013481	0.0327994
b3726	pstA	chr	-	3906571	3907462	-0.563842	-0.884951	-1.42774	-0.276132	-0.583083	-0.223065	-1.18377	-1.37297	-1.83285	-1.07469	-0.407554	-1.38535	0.126451	0.170704	0.01345	0.0327994
b3396	mrcA	chr	+	3520892	3523445	-1.7413	-1.40832	-1.34271	-1.56561	-1.11264	-0.997254	-2.38125	-2.30903	-2.51222	-1.47081	-1.25443	-2.35929	0.276853	0.33513	0.0135865	0.0329484
b2199	ccmC	chr	-	2293604	2294342	-1.03498	-0.54904	-1.1587	-0.714752	-0.47443	-0.52734	-1.74569	-1.23951	-1.40435	-0.936925	-0.562788	-1.52657	0.199327	0.250674	0.0137223	0.0330624
b1634	tppB	chr	+	1710792	1712295	-0.693204	-0.795764	-0.824596	-0.716339	-0.797893	-0.653605	-1.13199	-1.35318	-1.09509	-0.780034	-0.738798	-1.18375	0.447672	0.499688	0.013889	0.0334098
b3600	mtlD	chr	+	3772446	3773595	0.431907	0.734375	0.78706	0.497049	0.444098	0.725305	1.4123	1.29591	0.996721	0.662643	0.51062	1.30496	0.535026	0.586206	0.0139548	0.033514
b0797	rhlE	chr	+	830094	831459	-1.79881	-1.52401	-1.84521	0.602344	0.460444	1.95948	-1.71302	-1.36026	-2.21879	-1.7431	0.719613	-1.696	0.025188	0.0516598	0.0140943	0.0337947
b0307	ykgF	chr	+	321561	322989	0.671342	0.892833	0.326452	0.252504	-0.15082	0.438133	1.21036	0.885721	1.26641	0.582772	0.0871264	1.08334	0.133521	0.178628	0.0146541	0.0348562
b0525	ppiB	chr	-	553165	553660	0.293036	0.109258	0.215777	0.0806409	-0.0190514	0.0493562	0.384236	0.450005	0.628594	0.197761	0.028071	0.44341	0.0662144	0.102161	0.0149516	0.0351705
b2927	epd	chr	-	3070693	3071713	-3.09738	-2.91911	-3.1148	-2.97931	-2.77514	-3.0481	-3.29509	-3.33379	-3.52834	-3.04532	-2.90085	-3.36518	0.351578	0.407076	0.0149176	0.0351705
b0470	dnaX	chr	+	491315	493247	-2.34303	-2.59918	-2.49563	-2.34196	-1.98486	-2.10732	-2.9862	-2.9934	-2.98041	-2.50581	-2.13313	-2.97799	0.0663608	0.102183	0.0150389	0.0352644
b3312	rpmC	chr	-	3446589	3446781	0.545875	0.678572	0.673383	0.807557	1.00235	0.866833	0.450413	0.452576	0.431585	0.633784	0.912882	0.44828	0.0258173	0.0525882	0.0152237	0.0355299
b0712	ybgK	chr	+	743465	744398	-1.07447	-0.8733	-0.544945	-1.34342	-1.44052	-1.83489	-0.17697	-0.82323	-0.592339	-0.817052	-1.4738	-0.474555	0.0302428	0.059019	0.0154738	0.0359458
b1225	narH	chr	+	1282826	1284365	0.198329	0.154975	0.279431	1.47893	3.05216	1.6726	-1.26037	-1.36791	-1.65004	0.212538	1.96941	-1.36241	0.0635962	0.0989423	0.015534	0.0360283
b3163	nlpI	chr	-	3306061	3306946	-4.71353	-4.88462	-4.8259	-4.79881	-4.7399	-4.64555	-5.66443	-5.53682	-5.2542	-4.81551	-4.74051	-5.52927	0.30066	0.354741	0.0156212	0.0361179
b2431	yfeX	chr	-	2547667	2548567	0.324449	0.645656	0.608315	0.947197	0.644869	0.593844	0.139681	0.0208936	0.283395	0.543728	0.737317	0.118608	0.248336	0.303589	0.0159211	0.0366111
b3641	slmA	chr	+	3812516	3813113	-0.0636572	-0.156214	0.14112	0.0450658	0.0821752	-0.159945	-0.61499	-1.04173	-1.13778	-0.0317099	0.0086329	-0.854613	0.901005	0.916391	0.0159328	0.0366111
b3636	rpmG	chr	-	3809272	3809440	-0.366122	-0.228099	-0.155383	0.363251	-0.063054	0.858996	-0.900347	-1.35759	-0.991419	-0.24325	0.254685	-1.15006	0.133192	0.178348	0.0161189	0.03698
b1584	speG	chr	+	1654207	1654768	0.953606	0.705868	0.226535	1.69325	1.17688	1.33189	0.802423	0.594242	0.415079	0.528478	1.37761	0.66454	0.0478532	0.0808779	0.016402	0.0374579
b4058	uvrA	chr	-	4269071	4271894	0.122877	0.352896	0.0774397	0.464488	0.485212	0.433953	-0.378421	-0.488266	-0.835296	0.176083	0.46705	-0.4782	0.0790628	0.119275	0.0165528	0.0377445
b1915	yecF	chr	+	1993841	1994066	0.123395	-0.0971133	0.636758	0.779531	0.21972	1.15802	-0.403694	-0.600691	-1.20465	0.228428	0.567177	-0.643222	0.229652	0.284959	0.0165997	0.0377936
b3955	yijP	chr	-	4146554	4148288	0.0762758	-0.489735	-0.271688	0.335785	-0.0714657	0.395064	-0.596339	-0.773101	-0.616032	-0.251251	0.146885	-0.692136	0.112963	0.157493	0.0166683	0.0378917
b1269	rluB	chr	+	1324875	1325751	0.304469	0.66616	0.62323	0.964701	1.11828	1.1215	-0.273428	-0.0716499	-0.791372	0.544078	1.05579	-0.304229	0.0269991	0.0542532	0.0168623	0.0381581
b0742	ybgF	chr	+	778820	779612	-1.31773	-1.3152	-1.26657	-0.977241	-1.1111	-0.910893	-1.37657	-1.29222	-1.24594	-1.30066	-1.02734	-1.33258	0.0288786	0.0568786	0.0169748	0.0382283
b1660	ydhC	chr	+	1737934	1739146	-0.253529	0.370695	-0.312376	0.252504	-0.169576	0.540494	-1.30209	-0.575987	-0.975237	-0.112002	0.0942914	-1.07872	0.415307	0.469546	0.016996	0.0382283
b1787	yeaK	chr	+	1871597	1872101	-0.466792	-0.335547	-0.365877	-0.450336	-0.203128	0.0267801	-1.02171	-0.701295	-1.15034	-0.364963	-0.259295	-0.90904	0.319413	0.374199	0.0175201	0.0392292
b0434	yajG	chr	-	452812	453391	1.47015	1.32761	1.1648	1.67736	1.70376	2.05229	1.03824	1.34905	0.874316	1.29048	1.75178	1.11884	0.0348282	0.0649052	0.017798	0.0396493
b1652	rnt	chr	+	1726370	1727018	-1.15138	-0.49352	-0.241782	0.645879	0.601186	0.416759	-0.766794	-0.775295	-0.194131	-0.61422	0.596248	-0.672665	0.0413659	0.0730721	0.0180765	0.040173
b3094	exuR	chr	+	3244673	3245450	-0.338949	-0.638842	-0.786112	-1.30076	-0.988571	-0.960417	-0.39554	-0.58265	-0.614495	-0.635017	-1.11303	-0.480977	0.0460368	0.0788396	0.0184289	0.0408343
b3401	hslO	chr	+	3527795	3528674	0.623678	0.578387	0.60616	0.351619	0.700081	0.559523	1.19669	1.11589	1.07152	0.601422	0.534201	1.13481	0.584023	0.634752	0.0185711	0.0409698
b1874	cutC	chr	-	1956543	1957290	-0.866555	-1.22677	-0.504303	-1.91479	-1.82475	-2.07116	-1.21259	-1.12965	-1.54072	-0.862297	-1.8937	-1.23692	0.0257824	0.0525882	0.0186688	0.0411212
b0528	ybcJ	chr	-	555883	556096	-1.10252	-0.965734	-1.2961	-0.308127	-0.944343	-0.780575	-1.77622	-1.80529	-1.33082	-1.13841	-0.682574	-1.67526	0.130682	0.175619	0.0187842	0.0413142
b2299	yfcD	chr	-	2416655	2417198	0.314087	0.806271	0.233366	0.452606	0.572492	0.384472	0.096571	-0.244781	-0.00549713	0.429911	0.482447	-0.0482808	0.928599	0.939961	0.018979	0.0416809
b3424	glpG	chr	-	3558644	3559475	-1.25482	-1.30285	-1.38963	-1.08292	-1.10215	-0.759118	-1.51663	-1.6808	-2.04012	-1.32218	-1.03329	-1.65468	0.0818614	0.122381	0.0192541	0.0420002
b0437	clpP	chr	+	455900	456524	0.697582	0.651262	0.932413	0.370415	0.420951	0.551622	0.911047	0.917417	0.67877	0.768499	0.422813	0.864377	0.0480068	0.0810455	0.0193169	0.0420195
b1611	fumC	chr	-	1683208	1684612	-0.491853	0.210121	-0.355262	-0.946294	-1.34119	-0.736042	2.02476	1.79704	3.64518	-0.212597	-1.09976	2.07181	0.0481139	0.0811343	0.0193571	0.0420195
b1272	sohB	chr	+	1327355	1328405	-1.01005	-0.927135	-0.95891	-1.1745	-0.726292	-0.729949	-1.38514	-1.74452	-1.7142	-0.957371	-0.90453	-1.56262	0.614146	0.657887	0.0193589	0.0420195
b2572	rseA	chr	-	2706775	2707426	0.993466	0.33246	0.240378	-0.698871	-0.630812	-0.511827	-0.205127	0.113059	0.188999	0.447491	-0.634194	-0.0308185	0.0352993	0.0653739	0.0195287	0.0421863
b3755	yieP	chr	-	3938657	3939350	0.496235	0.592722	0.821602	0.659598	1.10523	0.623688	-0.00282375	-0.0116478	-0.189437	0.653063	0.789974	-0.000902969	0.4407	0.493015	0.0195551	0.0421863
b3640	dut	chr	+	3811954	3812410	1.70896	1.42029	1.61206	1.90094	1.67219	1.44823	1.24078	0.900385	0.884386	1.56441	1.70131	1.05668	0.586342	0.636808	0.0195188	0.0421863
b2133	dld	chr	+	2220206	2221922	0.272308	0.18958	0.0708899	0.326769	-0.141679	-0.0957319	0.946287	0.770987	0.704585	0.164542	0.022223	0.841701	0.433408	0.487789	0.0198991	0.042766
b4557	yidD	chr	+	3882838	3883096	-3.34433	-3.34039	-3.24439	-2.89659	-3.14453	-2.54979	-4.21691	-3.53018	-4.23272	-3.30884	-2.95358	-3.94769	0.117932	0.162595	0.0201692	0.0429678
b3850	hemG	chr	+	4032630	4033176	-0.34121	-0.332885	-0.0161617	-0.736575	-0.303749	-0.829151	0.0574957	0.134507	0.359937	-0.229026	-0.541091	0.123079	0.123562	0.167955	0.0203959	0.0432613
b0116	lpd	chr	+	127911	129336	0.978647	0.985373	0.98611	0.924458	1.03834	0.800521	1.21533	1.33854	1.2386	0.984328	0.953742	1.2627	0.46028	0.512225	0.0204919	0.0434031
b2511	der	chr	-	2633905	2635378	0.572192	0.574475	0.770243	1.83005	1.51807	1.21025	0.426419	0.513186	0.660583	0.649113	1.56535	0.482061	0.0274875	0.0549382	0.0205293	0.0434205
b2581	yfiF	chr	-	2715512	2716550	0.200953	-0.0320558	0.0960231	0.521135	0.545333	0.295035	-0.381687	-0.285634	-0.879713	0.0722111	0.484966	-0.460616	0.0259736	0.0527623	0.0210218	0.0442112
b1245	oppC	chr	+	1301857	1302766	-2.54075	-2.50838	-2.49043	-1.97589	-1.85978	-2.21858	-2.67707	-2.42264	-2.47545	-2.51689	-1.95305	-2.55529	0.0403973	0.0718658	0.0211902	0.0444397
b2514	hisS	chr	-	2637322	2638597	0.3196	-0.0836633	-0.0437144	0.457964	0.352201	0.360267	0.114438	-0.0919292	-0.158673	0.0215691	0.393128	-0.0103415	0.117933	0.162595	0.0213827	0.0447174
b0524	lpxH	chr	-	552440	553163	-3.2853	-3.42338	-3.63811	-3.35369	-3.31974	-3.24407	-4.40434	-3.98027	-4.00639	-3.44427	-3.31556	-4.20725	0.296164	0.350826	0.0218081	0.0455432
b1764	selD	chr	-	1844988	1846032	0.531065	0.606508	0.503622	0.624089	0.74633	0.771002	0.458673	0.497049	0.292656	0.54393	0.69867	0.442714	0.045465	0.0779925	0.0218482	0.0455629
b4021	pepE	chr	-	4227475	4228165	1.07526	0.64713	1.85559	-0.0458294	-0.443418	0.0563844	1.18986	0.489717	0.781206	1.13269	-0.215577	0.838455	0.0469556	0.0799965	0.0219268	0.045663
b1254	yciB	chr	-	1310374	1310914	0.101741	0.0430215	0.139525	0.378993	0.152251	0.379239	-0.349724	-0.0843161	-0.532454	0.0859341	0.268302	-0.298684	0.0961835	0.139046	0.0221097	0.0459153
b2599	pheA	chr	+	2735766	2736927	0.358804	-0.213778	-0.295908	-0.336878	-0.481863	-0.92141	0.20859	0.0829764	0.651146	-0.117286	-0.537367	0.183363	0.123739	0.167955	0.0221052	0.0459153
b1100	ycfH	chr	+	1155999	1156797	1.202	0.556084	0.941359	2.10593	1.77213	1.47995	0.901687	0.794628	0.685381	0.86075	1.83834	0.851126	0.0273129	0.0547361	0.0221442	0.045923
b0967	yccW	chr	-	1028001	1029192	0.191225	0.45927	0.674344	1.23096	1.09639	1.04802	-0.0493275	0.260194	0.508188	0.462166	1.13693	0.113988	0.0268516	0.0541028	0.0223352	0.0461903
b1219	ychN	chr	-	1272468	1272822	-0.860804	-1.08129	-0.669572	-1.41012	-1.48083	-1.50325	-1.13316	-0.827954	-0.943608	-0.883627	-1.44796	-0.983988	0.032146	0.0612872	0.0224349	0.0463323
b3336	bfr	chr	-	3464270	3464747	-1.17049	-1.92946	-1.81116	-2.64031	-2.41823	-2.40342	-1.45456	-0.654828	-0.597803	-1.68609	-2.50834	-1.04053	0.0574504	0.0919824	0.0225917	0.0465915
b0224	yafK	chr	-	245064	245805	-0.632413	-0.291882	-0.188801	-0.0578665	0.262314	-0.10776	-0.482343	-1.08495	-0.786337	-0.350828	0.0677395	-0.769279	0.0865933	0.127409	0.022628	0.0466018
b2935	tktA	chr	-	3077665	3079657	1.15271	1.16856	1.2319	1.31616	1.50639	1.46241	1.21997	1.16921	1.08779	1.18971	1.42695	1.18922	0.0361924	0.066658	0.0227724	0.0467433
b3199	yrbK	chr	+	3340857	3341433	-1.11271	-1.33913	-1.06481	-0.858421	-0.274733	-0.659111	-1.43431	-1.15763	-1.61449	-1.18207	-0.593532	-1.34453	0.0592603	0.0939646	0.0229236	0.046828
b2436	hemF	chr	+	2551246	2552146	-3.18521	-2.63441	-2.70214	-2.32931	-2.21095	-2.78057	-3.47486	-3.48579	-3.34497	-2.8334	-2.37588	-3.38046	0.178088	0.227563	0.0231862	0.0470358
b4052	dnaB	chr	+	4262336	4263752	-1.44735	-1.22684	-1.46146	-1.14768	-0.876561	-1.06023	-1.44592	-1.32836	-1.65291	-1.38355	-1.01357	-1.4305	0.0337038	0.0638263	0.0237052	0.0480231
b0891	lolA	chr	+	936594	937206	0.117682	0.252336	0.395222	0.388632	0.0864323	0.301457	-0.277394	-0.28449	-0.218794	0.268606	0.226069	-0.282327	0.97659	0.979881	0.023828	0.0482063
b2379	yfdZ	chr	-	2495078	2496317	0.216936	0.684763	0.228739	-0.530316	-0.534455	-0.0319463	0.342831	0.242407	0.751362	0.362418	-0.4433	0.347737	0.0310815	0.0599087	0.0238776	0.0482412
b3747	kup	chr	+	3929338	3931207	-0.468633	-0.567537	-0.608244	-0.201747	-0.524356	-0.665098	-1.27956	-1.17704	-1.27108	-0.552246	-0.43429	-1.24058	0.607277	0.652171	0.024449	0.0491954
b0166	dapD	chr	-	185122	185947	0.587319	0.815033	0.665004	0.604668	0.652525	0.685973	1.3296	1.00478	1.20281	0.694557	0.6369	1.1885	0.60777	0.652171	0.0245995	0.0494313
Below are not significant in either
b4059	ssb	chr	+	4272147	4272684	0.0860035	0.10677	0.0637266	0.0930471	0.0779539	0.213905	0.0018012	-0.122775	-0.128553	0.0804738	0.107238	-0.0676088	0.427483	0.482579	0.0249899	0.0501176
b3738	atpB	chr	-	3919258	3920074	-0.362323	-0.371208	-0.366702	-0.22046	-0.196256	-0.355909	-0.43308	-0.509698	-0.519027	-0.369941	-0.234437	-0.478563	0.158659	0.20705	0.0253553	0.0506086
b1920	fliY	chr	-	1997608	1998409	0.467213	1.65896	1.21492	-0.401767	-0.478731	0.043692	0.331372	0.481044	0.626185	1.09544	-0.363874	0.436632	0.0395302	0.0706608	0.0255063	0.0508418
b3980	tufB	chr	+	4173966	4175151	0.682584	0.676314	0.713563	1.01074	1.05364	0.835586	0.568197	0.624391	0.598021	0.692625	1.00638	0.601518	0.0500829	0.0829515	0.0255698	0.0509003
b0025	ribF	chr	+	21406	22348	-1.77683	-1.75425	-1.92717	-1.64561	-1.95153	-1.75242	-2.20898	-2.1509	-2.28828	-1.82086	-1.8074	-2.20894	0.750462	0.781972	0.025644	0.0509799
b4481	rffT	chr	+	3975547	3976627	-1.36137	-1.49632	-1.35526	-1.39881	-1.36156	-1.29264	-1.64164	-1.62329	-1.85027	-1.44028	-1.36957	-1.65728	0.398541	0.452653	0.0258095	0.0512405
b3888	yiiD	chr	+	4075471	4076461	-0.145764	-0.911886	-0.178533	-1.23377	-0.881702	-1.72088	0.60439	0.198615	-0.453677	-0.481595	-1.17409	0.262131	0.0679598	0.104214	0.0258861	0.051324
b3699	gyrB	chr	-	3875727	3878142	-0.50298	-0.333886	-0.173175	0.303256	-0.0718736	-0.00405736	-0.631578	-0.603809	-0.581903	-0.321046	0.0737651	-0.606307	0.0530699	0.086551	0.025985	0.0514517
b2515	ispG	chr	-	2638707	2639826	-1.32972	-1.25932	-1.24436	-1.11699	-1.02646	-1.19242	-1.41236	-1.32945	-1.26414	-1.27002	-1.09001	-1.34143	0.0538592	0.0875506	0.0260724	0.0514878
b0779	uvrB	chr	+	812748	814770	0.163739	-0.590228	-0.41693	0.247171	0.0186298	-0.00208346	-0.32881	-0.805946	-0.800278	-0.355526	0.0963666	-0.631156	0.242106	0.297834	0.0263317	0.0517937
b0948	rlmL	chr	+	1007066	1009175	-0.614256	-0.496915	-0.610313	0.118801	0.0653253	-0.283263	-0.845758	-0.509834	-1.12691	-0.57434	0.0101566	-0.762267	0.0406057	0.0720643	0.0263816	0.0518235
b0179	lpxD	chr	+	200970	201996	-2.07756	-2.04452	-2.11103	-1.26573	-1.45066	-1.66896	-1.92726	-1.89715	-2.1248	-2.08129	-1.41296	-1.96085	0.0311413	0.0599087	0.02654	0.051929
b3795	yifK	chr	+	3978909	3980295	-2.13805	-1.49759	-2.23115	-2.4566	-2.723	-2.8838	-1.98866	-2.15167	-2.12924	-1.99129	-2.66993	-2.06699	0.066278	0.102161	0.0273507	0.0533053
b1832	yebR	chr	-	1913654	1914206	-0.536782	-0.629733	-0.365266	-0.755273	-1.02797	-0.680581	-0.105605	-0.46503	0.0186225	-0.514292	-0.873941	-0.192891	0.0824378	0.123119	0.0275654	0.0536535
b1435	ydcP	chr	+	1504804	1506766	-0.883159	-0.625255	-0.789662	0.789151	0.323995	0.00159552	-0.855041	-0.972044	-0.926478	-0.770299	0.420249	-0.936356	0.0283567	0.0561477	0.0277985	0.0539661
b2370	evgS	chr	+	2482395	2485989	-2.03394	-1.42499	-1.56242	-2.42625	-2.32857	-2.16746	-1.45429	-1.60283	-1.93927	-1.66414	-2.34318	-1.54856	0.0593209	0.0939646	0.0282621	0.0547031
b0737	tolQ	chr	+	774375	775068	-0.0691679	0.335224	0.114591	0.252852	0.156121	0.0731358	-0.8532	-0.485789	-0.357163	0.127674	0.164443	-0.659433	0.809971	0.835791	0.0287001	0.0554274
b3935	priA	chr	-	4122634	4124833	-1.14326	-1.47349	-1.28438	-1.40143	-1.41635	-0.723331	-2.29245	-2.07075	-2.39027	-1.33023	-1.30032	-2.19809	0.664935	0.704689	0.0288256	0.0555976
b0393	rdgC	chr	-	408331	409243	0.462328	0.655409	0.614066	1.36822	0.897121	1.44378	0.299301	0.228809	0.769856	0.577363	1.15136	0.334073	0.0490082	0.0819888	0.0289805	0.05568
b3652	recG	chr	+	3823232	3825314	-2.29647	-2.50555	-2.72229	-2.47497	-1.94771	-2.37135	-2.96959	-2.75729	-3.15576	-2.56683	-2.20259	-2.92505	0.300497	0.354741	0.0289631	0.05568
b2943	galP	chr	+	3086305	3087700	-0.333854	-1.21009	-0.89256	-0.7808	-0.775558	-1.05897	0.928524	2.51967	2.47858	-0.874377	-0.851008	1.51339	0.843411	0.864903	0.0289772	0.05568
b3619	rfaD	chr	+	3792009	3792942	1.8922	1.59753	1.91499	2.42145	2.34963	1.93824	1.58958	1.56885	1.40724	1.79469	2.28124	1.55328	0.0839641	0.124524	0.0291903	0.0560107
b0427	yajR	chr	-	444525	445890	-2.66006	-2.7145	-2.50787	-3.38485	-2.93796	-3.48805	-2.66722	-2.40307	-2.46433	-2.61235	-3.22754	-2.52361	0.0491382	0.0820255	0.0295716	0.0565966
b1602	pntB	chr	-	1672995	1674384	-0.303718	-0.227779	-0.247497	-0.768122	-0.582392	-0.347518	0.116467	0.018895	0.0495612	-0.258466	-0.604633	0.066563	0.123651	0.167955	0.0300424	0.0573501
b1117	lolD	chr	+	1175841	1176543	0.11717	0.0595613	-0.157983	0.594705	0.81598	0.343717	-0.178333	0.10019	0.0998142	-0.0339153	0.639576	-0.0419105	0.0307752	0.0595895	0.0305367	0.0581447
b2962	yggX	chr	+	3102114	3102390	-0.0375183	-0.176913	-0.286376	-0.350568	-0.48966	-0.430162	0.647424	0.0971851	0.395041	-0.187596	-0.427096	0.384888	0.0497848	0.0826652	0.0306784	0.0583399
b1624	ydgJ	chr	-	1701291	1702332	-0.624369	-0.662967	-0.509716	-0.708134	-0.270369	-0.115352	-1.17245	-0.874831	-1.29833	-0.598716	-0.413529	-1.10987	0.316314	0.371737	0.0307197	0.0583439
b0817	mntR	chr	+	852405	852873	-0.796263	-0.196649	-0.433914	-1.01474	-1.03809	-1.1736	-0.552558	-0.798379	-0.808547	-0.475387	-1.05764	-0.687804	0.0655535	0.101562	0.0309122	0.0586347
b3834	yigP	chr	+	4017646	4018252	-0.660286	-0.811599	-0.5591	-0.730444	-1.12957	-1.03825	-0.319108	-0.478314	-0.463117	-0.679276	-0.986118	-0.402707	0.124916	0.168784	0.0311125	0.0589395
b1604	ydgH	chr	+	1676450	1677395	1.33835	1.50608	1.3759	1.90183	1.63245	1.55616	1.20058	1.27395	1.14547	1.41107	1.70281	1.21872	0.0917385	0.133397	0.0314732	0.0592527
b1826	mgrB	chr	-	1906646	1906790	-2.26021	-2.25307	-2.19924	-1.90423	-1.77443	-1.14683	-2.48913	-2.86927	-2.43127	-2.26122	-1.71683	-2.63914	0.113917	0.158205	0.0314768	0.0592527
b0095	ftsZ	chr	+	105304	106456	0.610353	0.547594	0.588826	0.161903	0.409389	0.25511	0.636979	0.645426	0.570817	0.581974	0.288645	0.631523	0.0438398	0.0761698	0.0317065	0.0595346
b2570	rseC	chr	-	2705343	2705823	-1.57387	-1.53713	-1.29068	-1.50538	-0.950078	-1.64933	-2.44384	-2.47254	-2.5524	-1.44546	-1.28284	-2.48925	0.700437	0.734989	0.0318277	0.0596871
b1583	ynfB	chr	+	1653831	1654173	1.14896	0.958843	1.19627	1.65609	1.23975	1.97272	1.04671	0.631965	0.536883	1.10003	1.50704	0.810752	0.121677	0.166218	0.0323465	0.0604316
b0124	gcd	chr	-	138834	141225	-0.858784	-1.49586	-1.23534	-1.34717	-1.38926	-1.62996	-1.1536	-0.697293	-0.833601	-1.27074	-1.41749	-0.996603	0.29949	0.354235	0.0324733	0.0605924
b3780	rhlB	chr	-	3962387	3963653	-0.644707	-0.526354	-0.297423	-0.0601022	0.0403532	-0.20217	-0.434607	-0.382859	-0.436657	-0.475911	-0.0476691	-0.406441	0.0340509	0.0642853	0.03298	0.0612309
b3400	hslR	chr	+	3527369	3527771	-1.06014	-0.847499	-0.587537	-0.983768	-1.65716	-0.977953	-0.0725648	-0.172631	0.917579	-0.805693	-1.30944	-0.0804344	0.242697	0.298165	0.0332558	0.0615893
b3849	trkH	chr	+	4031167	4032619	-1.6684	-1.41798	-1.44157	-1.56131	-1.54426	-1.22612	-1.95813	-2.09722	-2.56935	-1.49726	-1.49222	-2.15001	0.655737	0.697423	0.033396	0.0616955
b0033	carB	chr	+	30816	34038	0.71021	0.577311	0.474164	1.71602	1.27912	1.10718	0.487117	0.394356	0.52644	0.568108	1.40008	0.492124	0.03687	0.0673613	0.033481	0.061776
b1662	ribC	chr	-	1740624	1741266	-0.00479938	0.245369	0.208261	-0.0772929	-0.0195284	-0.481292	0.306877	0.327066	0.578951	0.160822	-0.142212	0.315557	0.127536	0.171856	0.0336922	0.0620027
b1322	ycjF	chr	+	1383534	1384596	-1.74	-0.636795	-0.738768	-1.76618	-1.52842	-1.42694	0.29895	-0.722828	0.152044	-1.03741	-1.6109	-0.150283	0.264372	0.321609	0.0336572	0.0620027
b0215	dnaQ	chr	+	236066	236798	0.281739	-0.41602	0.12831	0.568665	0.517588	0.548939	-0.0723174	-0.549292	-0.111669	-0.0329492	0.536412	-0.268773	0.122075	0.16654	0.0344412	0.0629239
b1528	ydeA	chr	+	1615051	1616242	-1.43651	-1.08647	-1.94333	-0.227944	0.417123	-0.64933	-1.69065	-1.33379	-1.61734	-1.53882	-0.0130983	-1.56248	0.0303888	0.0591298	0.0345869	0.0631127
b2395	yfeA	chr	-	2513664	2515854	-1.78166	-1.93013	-1.80081	-1.87067	-1.5658	-1.03042	-2.81087	-2.44075	-2.20641	-1.82157	-1.61657	-2.61345	0.290096	0.346198	0.0346313	0.0631162
b0634	mrdB	chr	-	664423	665536	-0.984407	-1.21178	-1.32951	-0.956622	-0.701977	-0.268508	-1.56025	-1.26715	-1.5931	-1.20141	-0.720372	-1.45798	0.0999284	0.143039	0.0349398	0.0633938
b0684	fldA	chr	-	710157	710688	0.952955	0.753684	0.675466	1.30784	1.18784	1.05111	0.780517	0.921676	0.946861	0.776001	1.20632	0.850358	0.0254305	0.0520854	0.0350993	0.0635801
b1333	uspE	chr	-	1395695	1396646	0.169731	0.362815	-0.0155747	-1.24019	-1.5341	-0.512791	0.114355	-0.180709	0.456301	0.153112	-1.25387	0.063789	0.0403014	0.0717809	0.0353036	0.0638725
b1180	ycgM	chr	+	1227301	1227961	-0.286284	0.142838	-0.441266	-1.08322	-1.04941	-1.13688	-0.671995	-0.697293	-0.90685	-0.220997	-1.07906	-0.715695	0.0337349	0.0638263	0.0358009	0.0645181
b1641	slyB	chr	+	1717899	1718367	0.350213	0.550828	0.391482	0.641941	0.683507	0.606108	0.0153436	0.0229405	0.341387	0.428868	0.653785	0.0592302	0.0596891	0.0942493	0.0358338	0.0645181
b1982	amn	chr	+	2053084	2054539	1.94038	1.69438	1.02943	0.546066	0.737978	-0.00221126	1.37973	1.497	1.04137	1.43781	0.485682	1.38004	0.0344282	0.0646452	0.0370461	0.0661411
b3425	glpE	chr	-	3559519	3559846	-0.314394	-1.98662	-0.541682	-0.462309	-0.931632	-0.918147	-1.61194	-1.59842	-1.13426	-1.13502	-0.755159	-1.58285	0.772611	0.801615	0.0370153	0.0661411
b1186	nhaB	chr	-	1232398	1233940	-0.531783	-0.288597	-0.427714	-0.346678	-0.446931	-0.40051	-0.62866	-0.705451	-0.897069	-0.404882	-0.407124	-0.705148	0.830278	0.854378	0.0370153	0.0661411
b3669	uhpA	chr	-	3848158	3848749	-1.58854	-1.93068	-2.21183	-1.45631	-1.651	-1.99511	-2.29798	-2.31101	-2.90685	-1.92561	-1.64028	-2.42702	0.431573	0.486827	0.0371785	0.0662979
b3729	glmS	chr	-	3909861	3911691	0.20983	0.117886	0.309809	0.51265	0.564703	0.316608	0.0620267	0.265216	-0.0491545	0.21595	0.500919	0.110043	0.0598306	0.0943726	0.0372377	0.066324
b2560	yfhB	chr	-	2695936	2696572	-1.46904	-1.38445	-0.882771	-0.0768779	-0.400998	-0.979479	-1.34218	-1.73711	-1.64382	-1.23449	-0.438867	-1.56499	0.0852478	0.126052	0.0374415	0.0666074
b3289	rsmB	chr	+	3433228	3434518	0.819312	0.822145	-0.0760426	1.91511	1.96551	1.26655	1.03623	0.400004	0.945593	0.404441	1.78462	0.761482	0.0368213	0.0673613	0.0380416	0.0674332
b2326	yfcM	chr	-	2442224	2442773	-1.24447	-1.44551	-1.69547	-0.999565	-0.762176	-0.912365	-1.32475	-1.64405	-1.93722	-1.49025	-0.872874	-1.52712	0.029873	0.0584506	0.038182	0.0675214
b0408	secD	chr	+	426870	428718	-1.53029	-1.63294	-1.45539	-1.63921	-1.48187	-1.44634	-1.69697	-1.75688	-1.91115	-1.54219	-1.52722	-1.74794	0.838711	0.861269	0.0381786	0.0675214
b4044	dinF	chr	+	4255764	4257144	-2.5618	-2.17036	-2.211	-0.909768	-0.924987	-1.72148	-2.35633	-2.26715	-2.51781	-2.3065	-1.09958	-2.33635	0.0351218	0.0653705	0.0388873	0.0685129
b4160	psd	chr	-	4387414	4388383	0.316035	0.437663	0.541864	0.855152	0.118439	0.752241	-0.533113	-0.406801	-0.24085	0.44361	0.473593	-0.424014	0.602475	0.647714	0.0393283	0.0690564
b3925	glpX	chr	-	4112591	4113602	-0.753705	-0.541453	-0.472594	-0.437625	-0.635326	-0.511827	-0.688454	-0.855953	-0.958526	-0.570608	-0.533395	-0.789999	0.587427	0.637521	0.0393914	0.0690857
b1914	uvrY	chr	-	1992726	1993383	-2.40317	-2.48718	-2.56506	-2.39039	-2.22886	-2.20541	-2.70205	-2.71191	-2.44047	-2.48001	-2.28558	-2.648	0.0504791	0.0834332	0.0395258	0.0691562
b3794	rffM	chr	+	3977978	3978719	-1.16691	-1.04148	-0.777868	-0.34968	-0.559703	0.21574	-0.922476	-0.995847	-1.51781	-0.986509	-0.357876	-1.00016	0.0615668	0.0964978	0.0395032	0.0691562
b1221	narL	chr	-	1274401	1275052	2.37316	1.67899	2.27391	2.88725	2.16172	3.26056	1.15832	1.30623	1.26308	2.06162	2.57082	1.23248	0.174253	0.224255	0.0396625	0.0691562
b0966	hspQ	chr	-	1027626	1027944	-1.85375	-1.25398	-1.46298	-1.79841	-1.69413	-1.93173	-1.04899	-0.71256	-0.146037	-1.51982	-1.78677	-0.80176	0.242228	0.297834	0.0396395	0.0691562
b2893	dsbC	chr	-	3036133	3036844	1.42344	1.65655	1.48399	1.6191	1.68677	1.4294	0.898782	1.32904	1.0334	1.53011	1.60155	1.05613	0.612383	0.656471	0.0396638	0.0691562
b2260	menE	chr	-	2371669	2373025	-1.35664	-1.81199	-1.45337	-0.357227	-1.34063	-1.3274	-1.81612	-2.33699	-2.68446	-1.54504	-1.0255	-2.17854	0.239248	0.295389	0.0398516	0.0694023
b4373	rimI	chr	+	4606207	4606654	-0.933316	-0.950565	-1.41577	-0.942189	-0.106311	-0.171283	-1.58111	-1.92928	-1.04435	-1.12862	-0.451962	-1.61088	0.105909	0.150332	0.0404655	0.0703124
b4054	tyrB	chr	+	4265136	4266330	1.08165	1.84381	0.638551	0.530182	0.690844	1.05111	1.63211	1.12271	1.433	1.10609	0.696761	1.40271	0.350926	0.406637	0.0405145	0.0703124
b4466	yghJ	chr	-	3112571	3117134	-0.140706	-0.397458	-0.439711	-0.508196	-0.0920971	-0.0860628	-0.697197	-0.773188	-0.903318	-0.351615	-0.255796	-0.76204	0.598384	0.64518	0.0405158	0.0703124
b0912	ihfB	chr	+	963050	963335	0.630828	0.125333	0.0295839	1.20636	0.983982	1.22326	0.948121	0.700591	0.822884	0.215554	1.09864	0.83006	0.0286644	0.0566064	0.0407496	0.0704718
b3244	tldD	chr	-	3388604	3390050	-0.259129	-0.292573	-0.761738	-0.893178	-0.891242	-0.841975	-0.594257	-0.26488	-0.455323	-0.477701	-0.884536	-0.47691	0.112831	0.157493	0.0409235	0.0706904
b4291	fecA	chr	-	4512375	4514700	-0.532156	-0.480907	-0.772751	-0.474998	0.119569	-0.211925	-0.835151	-0.64566	-1.04759	-0.601938	-0.191987	-0.812125	0.12696	0.171235	0.0413584	0.0711747
b3727	pstC	chr	-	3907461	3908421	-0.495807	-0.588966	-0.154998	0.41216	2.19443	1.03079	-0.965209	-1.18623	-0.467428	-0.412487	1.08215	-0.971805	0.0816439	0.122259	0.0423742	0.0727742
b2328	mepA	chr	-	2443581	2444406	-0.623479	0.00967106	-0.407918	-0.0116475	0.148911	0.628655	-0.675548	-1.40795	-0.435544	-0.343069	0.156527	-0.871645	0.0898984	0.131363	0.0430087	0.0736938
b1175	minD	chr	-	1223771	1224584	1.14303	0.835232	0.685766	0.654759	0.688916	0.499686	1.21163	1.13105	1.70009	0.85251	0.641417	1.23897	0.168296	0.217528	0.0430624	0.0737011
b1647	ydhF	chr	-	1722759	1723656	0.861234	1.25145	0.83659	0.48364	-0.0587385	0.430397	0.87194	0.767232	1.15012	0.981834	0.210695	0.882543	0.0360354	0.066489	0.0433052	0.0739466
b1251	yciI	chr	-	1308592	1308889	1.15187	1.02654	0.292941	-0.398268	-0.254528	-0.438433	1.43672	0.525099	1.68211	0.713218	-0.359595	1.10587	0.0423057	0.0738491	0.0432911	0.0739466
b0103	coaE	chr	-	112598	113219	-2.9415	-3.05584	-2.57618	-2.61186	-2.57584	-2.46089	-3.37199	-3.13787	-2.883	-2.85026	-2.55616	-3.30306	0.157746	0.206219	0.0434545	0.0741166
b2682	ygaZ	chr	+	2807638	2808376	-1.81495	-1.68324	-1.65593	-1.24519	-1.49952	-1.13476	-1.55723	-1.94522	-1.73692	-1.7093	-1.34829	-1.78854	0.041795	0.0733844	0.0436603	0.0743694
b4049	dusA	chr	+	4259736	4260729	-0.335618	-0.356019	-0.0647738	0.66874	0.727924	0.0979037	-0.458507	-0.297762	-0.328066	-0.246919	0.565483	-0.375851	0.0467904	0.0798063	0.0437026	0.0743694
b0345	lacI	chr	-	365651	366734	0.161806	-0.675381	-0.0539585	-1.1728	-1.3116	-0.774861	-0.483541	-0.333786	-0.617343	-0.268248	-1.1687	-0.464108	0.0486208	0.0816193	0.0440465	0.0747152
b2907	ubiH	chr	-	3050361	3051540	-1.81397	-1.88299	-1.89952	-1.50538	-1.49327	-1.77112	-2.02674	-1.79658	-1.96825	-1.88518	-1.54764	-1.903	0.0834255	0.123849	0.0440564	0.0747152
b3485	yhhJ	chr	-	3623701	3624829	-2.04928	-1.16793	-1.28191	-2.12478	-1.85156	-2.41117	-0.953286	-1.0554	0.160265	-1.49633	-2.02648	-0.811403	0.137919	0.183358	0.0446919	0.0755349
b2526	hscA	chr	-	2655106	2656957	-0.331856	-0.130128	-0.313089	-0.164697	-0.0367628	-0.392449	-0.669981	-0.822736	-1.32556	-0.2616	-0.139209	-0.848333	0.652205	0.694659	0.0446801	0.0755349
b1839	yebY	chr	-	1921388	1921730	0.356607	0.458787	0.590539	-0.0379242	-0.359948	0.065831	0.378476	0.489717	0.41908	0.476546	-0.175113	0.422722	0.0274693	0.0549382	0.0447818	0.075542
b1961	dcm	chr	-	2028922	2030341	-1.83626	-2.01557	-1.63204	-1.18775	-0.833418	-1.42694	-1.93541	-1.5973	-1.82127	-1.82919	-1.08772	-1.7718	0.0375437	0.068008	0.0454193	0.0764173
b3040	zupT	chr	+	3180571	3181345	-0.615041	-0.338423	-0.180372	-1.0744	-1.3634	-0.798474	-0.419291	-0.516377	-0.338007	-0.363837	-1.16604	-0.408567	0.0301238	0.0588639	0.0462932	0.07745
b3282	rimN	chr	-	3428864	3429437	0.771693	0.69082	0.22283	1.4661	1.56536	1.04183	0.72755	0.497002	-0.19903	0.507502	1.43908	0.464531	0.0276305	0.0551498	0.0466072	0.07772
b2125	yehT	chr	-	2210264	2210984	-0.0220104	0.349633	-0.390704	-0.804651	-1.48891	-0.64933	0.23451	-0.08015	-0.274581	-0.046547	-1.10663	0.0147057	0.0475248	0.0804605	0.0466111	0.07772
b1539	ydfG	chr	+	1625540	1626287	0.928773	0.598739	0.894078	0.459466	0.598021	0.494183	1.03932	1.43202	0.935098	0.801733	0.52973	1.14211	0.0944029	0.136737	0.0465457	0.07772
b0853	ybjN	chr	+	892179	892656	0.203737	0.228786	0.523917	0.48255	0.123409	0.694624	-0.18836	-0.329884	-0.136331	0.325681	0.346912	-0.224969	0.595442	0.642939	0.0473294	0.0788294
b3787	rffD	chr	+	3969282	3970545	0.00848943	-0.203773	0.124671	0.158903	0.42628	0.289269	-0.0938283	-0.0511332	-0.487525	-0.0288169	0.294445	-0.166528	0.0658437	0.101702	0.0479992	0.0795889
b0160	dgt	chr	+	179236	180754	-0.818983	-1.14674	-1.1888	-1.22011	-2.027	-1.06437	-0.0885316	-0.289869	-0.387475	-1.07269	-1.59824	-0.172983	0.326814	0.38137	0.0486128	0.0804271
b2995	hybB	chr	-	3141007	3142186	-0.145212	-0.72971	0.0802321	-1.48986	-1.528	-0.857917	-0.763396	-0.155144	-0.567539	-0.296521	-1.4016	-0.595411	0.0346207	0.0648167	0.0494366	0.0816994
b3189	murA	chr	-	3333256	3334516	0.0104135	-0.0554441	0.124368	0.221722	0.157245	0.17193	-0.118439	-0.174113	-0.459307	0.0303639	0.19087	-0.205214	0.0816978	0.122259	0.0501203	0.0825543
b2946	rsmE	chr	+	3089155	3089887	-0.925899	-0.985145	-1.0099	-0.22406	-0.786471	-0.591997	-1.3067	-1.0078	-1.03238	-0.976118	-0.566868	-1.16047	0.113554	0.15802	0.0507568	0.0834183
b0851	nfsA	chr	+	890406	891129	1.42944	1.66544	1.63656	1.82379	1.49423	1.49816	1.03257	1.34648	0.822582	1.58208	1.60294	1.08426	0.842464	0.864528	0.0509431	0.08354
b0417	thiL	chr	+	434857	435835	-0.969226	-1.50605	-1.51822	0.535017	0.389772	-0.57738	-1.29178	-0.798379	-1.31617	-1.37454	0.221318	-1.11917	0.034716	0.0648167	0.0510403	0.0836073
b0418	pgpA	chr	+	435812	436331	-1.85634	-1.90523	-1.7922	-1.07139	-1.13597	-1.50158	-2.45216	-1.81452	-1.76389	-1.83631	-1.16292	-2.10065	0.0378768	0.068528	0.0517032	0.0846001
b2892	recJ	chr	-	3034394	3036128	-1.45108	-1.43238	-1.45945	-1.05606	-1.07134	-1.2948	-1.39505	-1.34134	-1.60668	-1.45258	-1.09794	-1.41582	0.0563495	0.0904142	0.0518227	0.0846096
b2733	mutS	chr	+	2855114	2857676	-0.208129	-0.0491026	-0.185386	-0.127049	-0.0930869	-0.0643677	-0.514138	-0.913575	-1.13867	-0.143253	-0.0945219	-0.757547	0.404505	0.458378	0.0518077	0.0846096
b4395	ytjC	chr	+	4631819	4632467	-0.0556664	-0.640497	-0.729369	-1.2069	-0.971121	-0.837403	-0.329575	-0.58265	-0.751571	-0.539872	-1.03211	-0.526467	0.112325	0.157192	0.0519022	0.0846467
b1255	yciC	chr	-	1310943	1311687	-0.0519391	0.0898043	0.541134	0.320699	0.240478	0.824601	-0.343789	-0.257164	0.0740416	0.201923	0.366171	-0.265084	0.352326	0.407625	0.0524359	0.0854235
b1105	ycfM	chr	+	1161860	1162502	0.484176	0.971296	0.461013	-0.108578	0.221794	-0.362168	1.02722	0.610117	0.317883	0.625454	-0.0301735	0.759782	0.0382963	0.069119	0.0530677	0.0861195
b2188	yejM	chr	+	2282397	2284158	-2.39622	-2.0347	-2.47752	-1.90239	-2.03389	-2.55487	-2.92206	-3.02768	-2.89911	-2.30285	-2.0799	-2.95815	0.598981	0.645356	0.0537501	0.0870672
b4406	yaeP	chr	-	213924	214125	-1.01136	0.142217	-0.242841	-1.4552	-2.28668	-1.43988	-0.407214	-1.2173	-0.404349	-0.368402	-1.88021	-0.677849	0.038499	0.0694007	0.05412	0.0872192
b3431	glgX	chr	-	3567368	3569342	-2.17129	-1.85561	-2.46699	-2.52902	-2.12052	-2.35787	-1.17517	-1.4009	-1.96825	-2.17796	-2.33102	-1.44139	0.471831	0.523125	0.054124	0.0872192
b1185	dsbB	chr	-	1231722	1232253	-1.01649	-1.03941	-1.00129	-1.02203	-0.829594	-1.01904	-1.2645	-1.24393	-1.61638	-1.01887	-0.933206	-1.31819	0.432434	0.48706	0.0542649	0.0873518
b3725	pstB	chr	-	3905615	3906389	-0.0905293	-0.157713	-0.232157	0.452531	0.743674	1.374	-0.257571	-0.179686	0.215547	-0.169591	0.737452	-0.134106	0.0616514	0.0965255	0.0554127	0.0888155
b1642	slyA	chr	-	1718413	1718848	-1.32629	-1.67143	-1.38857	-1.2931	-1.60491	-1.70419	-1.00901	-1.29613	-0.84076	-1.4666	-1.52859	-1.13625	0.682413	0.720405	0.0559933	0.0896496
b0471	ybaB	chr	+	493299	493629	1.64537	1.32903	1.32786	1.81533	1.34654	1.59286	1.05434	1.30347	1.02546	1.40035	1.55084	1.13912	0.432107	0.48706	0.0564933	0.090256
b3125	garR	chr	-	3269888	3270773	0.7665	0.918674	1.4214	0.576136	0.694539	0.859219	1.38141	2.49883	1.88419	1.05293	0.680933	1.77999	0.236761	0.292805	0.0566235	0.090367
b2153	folE	chr	-	2241005	2241674	0.520877	0.453837	0.536092	0.96357	1.38043	1.13328	0.664759	0.750489	0.683331	0.504814	1.17419	0.714008	0.0281651	0.0559918	0.0571187	0.0910596
b0657	lnt	chr	-	688565	690104	-2.69865	-2.59168	-2.44157	-2.26412	-2.34752	-2.6098	-2.89523	-2.81258	-3.41274	-2.56996	-2.35319	-2.97365	0.261517	0.318658	0.0571863	0.0910699
b0876	ybjD	chr	+	915695	917354	0.545494	0.696436	0.348227	-0.21316	-0.227376	-1.12577	0.544775	0.738044	0.602706	0.501042	-0.401546	0.598141	0.061213	0.0960444	0.0578579	0.091747
b3184	yhbE	chr	-	3329791	3330757	-3.04701	-3.07439	-2.72178	-2.72581	-2.97611	-2.92351	-3.50379	-3.58141	-4.30171	-2.9408	-2.8659	-3.71763	0.626788	0.670465	0.0582056	0.0922001
b4461	yfjD	chr	+	2746795	2748082	-1.88613	-1.8953	-2.01328	-1.50413	-1.64838	-0.948891	-2.40209	-2.13449	-1.77757	-1.93343	-1.49181	-2.22827	0.113149	0.157605	0.0592881	0.0937155
b0421	ispA	chr	-	439425	440325	-1.06074	-0.750247	-0.771846	-0.338668	-0.347189	-0.268906	-0.5283	-0.744269	-0.912452	-0.845868	-0.320459	-0.648616	0.0266365	0.0538081	0.0600669	0.0948328
b3788	rffG	chr	+	3970544	3971612	-0.288245	-0.941763	-0.525243	-0.338853	-0.194277	-0.0834766	-0.473731	-0.501302	-0.377326	-0.637029	-0.232745	-0.452801	0.17547	0.225053	0.0604678	0.0950756
b0398	sbcD	chr	-	414973	416176	-0.270291	0.379783	-0.188801	0.0598585	0.226264	-0.161044	-0.418188	-0.682186	-1.2515	-0.0096567	0.0940296	-0.670691	0.788631	0.816601	0.0604488	0.0950756
b4372	holD	chr	+	4605825	4606239	-2.85423	-2.46464	-2.23216	-2.24419	-2.52273	-2.76036	-2.80445	-3.40465	-3.53245	-2.49807	-2.45848	-3.12994	0.974791	0.978735	0.0605942	0.0951738
b0414	ribD	chr	+	432678	433782	-0.319223	-0.289616	-0.260582	0.726623	0.279093	0.275861	-0.0667638	-0.370312	-1.00455	-0.290564	0.421998	-0.381533	0.0394357	0.0705767	0.0610755	0.0956794
b1687	ydiJ	chr	-	1763652	1766709	-0.65288	-1.08718	-0.818689	-1.22229	-0.655641	-1.17128	-0.113413	-0.227364	0.924835	-0.877276	-0.989148	-0.0490703	0.504708	0.556262	0.0614472	0.0960072
b0839	dacC	chr	+	879949	881152	0.495143	0.923976	0.834734	0.0585895	0.389342	0.210365	0.584014	0.614207	0.400579	0.774389	0.223884	0.605954	0.0345233	0.064742	0.0616583	0.096236
b3499	yhiR	chr	+	3643407	3644250	0.933533	0.961468	0.519406	2.79437	1.61158	2.13001	0.897219	0.926265	0.850016	0.771996	2.0589	0.871117	0.0413699	0.0730721	0.063392	0.0986319
b3865	yihA	chr	-	4048155	4048788	0.232672	0.0822519	0.280495	0.148751	0.639759	0.722351	-0.0254742	-0.386633	0.120842	0.199535	0.452741	-0.119166	0.224604	0.279629	0.0639814	0.0994451
b3177	folP	chr	-	3322084	3322933	-0.668944	-0.90515	-0.850931	-1.19191	-1.102	-0.953007	-0.334511	-0.562751	-0.859544	-0.820983	-1.11012	-0.498773	0.0516401	0.084683	0.0642136	0.0997019
b3105	yhaJ	chr	-	3251339	3252236	-0.892896	-0.913401	-1.19362	-1.67581	-0.979088	-1.91236	-0.269104	-0.539228	-1.008	-1.01982	-1.41031	-0.510256	0.195397	0.246355	0.0644136	0.0999082
b3035	tolC	chr	+	3176136	3177618	1.49337	1.4316	1.21686	1.7295	1.69322	1.6785	1.50359	1.31702	1.14128	1.36012	1.70331	1.37078	0.0581023	0.0925288	0.0653614	0.101063
b3359	argD	chr	-	3486981	3488202	-0.261341	0.0164602	-0.298984	0.254619	-0.363169	0.628655	-0.570729	-1.10872	-0.546954	-0.185786	0.0045188	-0.79977	0.346042	0.401603	0.0663457	0.102446
b4351	mrr	chr	+	4584971	4585886	0.689921	0.684052	1.83977	0.0222137	-0.457995	-0.760752	0.483933	0.40699	0.325172	1.03827	-0.384176	0.447525	0.0409583	0.0725371	0.0665458	0.10253
b1622	malY	chr	+	1698980	1700153	1.14625	0.0695773	-0.156642	-0.446977	-1.0284	-0.456685	-0.0624716	1.00898	0.183753	0.148822	-0.731146	0.240436	0.115216	0.159587	0.0670133	0.103081
b3737	atpE	chr	-	3918972	3919212	1.53867	1.50494	1.57005	2.31373	2.25039	1.91352	1.68992	1.71592	1.71667	1.53693	2.21511	1.71407	0.0351702	0.0653739	0.0672766	0.103298
b0952	ymbA	chr	+	1014118	1014682	-0.0210167	-0.404352	-0.739117	0.147263	0.0457618	-0.31543	-1.05829	-1.26404	-0.36843	-0.464642	-0.00275079	-1.03595	0.246998	0.302699	0.0674319	0.103298
b3192	yrbC	chr	-	3335277	3335913	1.03612	1.19008	1.22427	1.18551	1.19177	1.15378	0.849622	0.849904	0.474796	1.15636	1.18404	0.77703	0.690772	0.727411	0.0673793	0.103298
b1279	yciS	chr	+	1338266	1338575	-1.94102	-1.93185	-2.41962	-1.90264	-1.97359	-1.89642	-2.11194	-2.51157	-2.3803	-2.13706	-1.93863	-2.32705	0.394761	0.448702	0.0675033	0.103301
b4124	dcuR	chr	-	4347337	4348057	1.40341	1.02289	0.300422	-0.453129	-0.296975	-0.312295	0.200266	-0.128932	0.396931	0.750937	-0.360661	0.13798	0.0566946	0.09087	0.0679989	0.10374
b3279	yrdA	chr	+	3427257	3427812	0.256659	0.235992	0.754615	-0.736285	-0.922933	-0.14683	0.243388	-0.167613	0.734868	0.421473	-0.733256	0.135147	0.0283547	0.0561477	0.0682581	0.104029
b1630	rsxD	chr	+	1707165	1708224	-0.774718	-1.09734	-0.63626	-0.273143	0.173607	-0.436337	-1.52234	-1.52511	-0.543445	-0.855466	-0.141252	-1.36519	0.0490004	0.0819888	0.0690315	0.104794
b3639	dfp	chr	+	3810753	3811974	0.293159	0.492289	0.256685	0.651887	0.376851	0.294086	0.192969	0.108913	0.00359887	0.34095	0.456734	0.128024	0.518421	0.569689	0.0689785	0.104794
b2295	yfbV	chr	-	2410698	2411154	-0.315381	-0.0160767	-0.24009	0.153558	-0.219853	0.918354	-0.583739	-0.604184	-1.10408	-0.196965	0.0919986	-0.738563	0.290164	0.346198	0.0693091	0.104879
b2038	rfbC	chr	-	2107604	2108162	1.06758	1.19585	1.35093	1.84751	1.59167	2.346	0.939464	0.970715	1.59706	1.22071	1.80909	1.03661	0.0681434	0.104375	0.0694266	0.10495
b1128	ycfD	chr	-	1186341	1187463	0.247098	0.125646	-0.100348	0.693824	0.353406	0.300839	-0.00201864	0.143813	0.0166717	0.0516641	0.449706	0.0480925	0.0906249	0.132295	0.0701881	0.105887
b1814	sdaA	chr	+	1894955	1896320	0.68632	0.919606	0.631268	0.924737	1.07188	0.682866	0.483163	0.709227	0.348869	0.749583	0.940396	0.53911	0.366321	0.421524	0.0705487	0.106215
b1291	sapD	chr	-	1350659	1351652	-0.706509	-0.422956	-0.488361	-0.0102948	-0.320366	0.0136348	-0.318163	-0.694677	-0.916127	-0.536095	-0.145825	-0.562648	0.0368297	0.0673613	0.0709264	0.106569
b3700	recF	chr	-	3878170	3879244	-2.36884	-1.97694	-2.54168	-1.75899	-1.57257	-1.75317	-2.38118	-3.84429	-3.32743	-2.33745	-1.67128	-3.05319	0.0556455	0.0897683	0.070898	0.106569
b3956	ppc	chr	-	4148469	4151121	-0.172997	0.37263	-0.047567	-0.358922	-0.42399	-0.418717	0.267047	0.0718531	-0.186265	0.0465945	-0.400845	0.111107	0.109492	0.154388	0.0717272	0.107338
b0402	proY	chr	+	420209	421583	-0.664473	-0.407303	-0.459022	-0.259352	-0.577815	-0.576081	-0.807238	-1.47984	-1.72628	-0.50512	-0.466726	-1.25123	0.782248	0.810555	0.0725314	0.108216
b2830	nudH	chr	-	2966468	2966999	-1.78213	-1.42879	-1.46088	-1.6836	-1.39625	-1.37803	-2.37199	-1.80002	-1.89958	-1.54454	-1.4969	-2.11266	0.659841	0.700787	0.0726566	0.108294
b2432	yfeY	chr	-	2548662	2549238	-0.978182	-1.19476	-0.659959	-1.69496	-1.41896	-1.51688	-1.32713	-0.952754	-1.28066	-0.951564	-1.53771	-1.18	0.0415634	0.0733268	0.0750763	0.111789
b3630	rfaP	chr	-	3803175	3803973	-1.17003	-1.21913	-0.561797	-0.189876	-0.411715	-0.0643677	-0.411132	-0.597297	-0.857606	-0.979599	-0.270824	-0.538064	0.0505015	0.0834332	0.0755158	0.112331
b0736	ybgC	chr	+	773974	774379	-1.84703	-2.06059	-1.95802	-1.85473	-1.59141	-1.87994	-2.72879	-2.32956	-2.05124	-1.96291	-1.70885	-2.44139	0.190683	0.241229	0.0759882	0.112921
b1066	rimJ	chr	+	1124784	1125369	0.162716	0.751458	-0.260872	-1.1777	-1.16985	-0.789508	-0.643981	0.193844	-0.427159	0.194367	-1.1069	-0.317643	0.0343231	0.0645291	0.0762023	0.113013
b3249	mreD	chr	-	3396408	3396897	-2.62163	-2.57747	-2.52789	-2.06522	-1.24156	-1.94211	-2.12183	-2.90823	-2.7122	-2.57029	-1.70969	-2.52339	0.0828096	0.123427	0.0761819	0.113013
b1114	mfd	chr	-	1169740	1173187	-0.722238	-0.433397	-0.186874	-0.598343	-0.760813	-0.64933	-0.404533	-0.206135	0.155338	-0.424016	-0.676912	-0.217743	0.285399	0.341607	0.0771761	0.114343
b2806	ygdE	chr	-	2938164	2939265	-1.57417	-1.6423	-1.62783	-1.26766	-0.816545	-1.04667	-1.38144	-1.36026	-1.5577	-1.62579	-1.03916	-1.37821	0.0451896	0.0776093	0.0774905	0.114695
b2186	yejK	chr	-	2280961	2281969	0.645007	0.521635	1.0415	0.714333	1.17844	0.6228	0.100913	0.341661	0.52979	0.74503	0.87966	0.259779	0.682667	0.720405	0.0786981	0.116251
b4260	pepA	chr	-	4482462	4483974	-0.324475	-0.50492	-0.139356	-0.942336	-0.892467	-0.892218	-0.520695	-0.000739299	-0.506395	-0.320407	-0.914184	-0.340874	0.0284124	0.0561833	0.0789514	0.11651
b1661	cfa	chr	+	1739436	1740585	0.110627	0.0628437	0.00701314	0.746278	0.423685	1.08888	0.182834	0.024909	0.363548	0.0640835	0.649443	0.149307	0.0657278	0.101629	0.0804553	0.118612
b0189	rof	chr	-	213677	213932	-1.29984	-0.191374	-0.709111	-1.90977	-1.60716	-0.905169	-0.787023	-0.705755	0.328367	-0.754935	-1.59242	-0.634033	0.165848	0.214554	0.0826192	0.121441
b3554	yiaF	chr	-	3716356	3717067	0.0298694	0.0983813	-0.135785	0.377075	0.147603	0.0898878	-0.51491	-0.58591	0.0257636	-0.0135279	0.217974	-0.486371	0.14124	0.187235	0.0827451	0.121506
b2836	aas	chr	-	2971876	2974036	-2.41799	-2.30627	-2.11841	-2.37784	-2.79755	-2.52534	-1.95118	-1.96659	-2.41586	-2.27875	-2.59909	-2.04015	0.138463	0.183917	0.0834144	0.122248
b0102	yacF	chr	-	111855	112599	0.120285	0.00193559	0.0987755	1.34812	0.708883	1.17849	0.477161	0.534249	0.417905	0.0709383	0.999331	0.486435	0.0306229	0.0593717	0.0835664	0.122311
b3813	uvrD	chr	+	3996005	3998168	-2.25458	-2.34121	-2.28477	-2.21204	-1.97776	-2.50379	-2.6566	-2.6179	-3.27189	-2.30243	-2.16286	-2.74676	0.723466	0.75649	0.0836219	0.122311
b1913	uvrC	chr	-	1990897	1992730	-2.41513	-2.35469	-2.27539	-2.20933	-1.99006	-1.85656	-2.44999	-2.18548	-2.32189	-2.34051	-2.04111	-2.33401	0.0697319	0.106384	0.0843378	0.123237
b0133	panC	chr	-	147943	148795	1.01848	0.871012	0.496722	0.31982	0.427763	0.410717	0.640781	0.815786	1.18599	0.749703	0.386981	0.804885	0.112901	0.157493	0.0855714	0.124918
b0639	nadD	chr	-	669153	669795	-1.12384	-1.31766	-0.522044	0.434762	-0.193851	-0.0426727	-0.833877	-0.783757	-0.155529	-0.995029	0.0572933	-0.744509	0.0282581	0.0561018	0.0866773	0.126408
b2573	rpoE	chr	-	2707458	2708034	-2.64768	-2.21658	-2.37663	-3.14382	-3.09917	-3.05291	-2.93541	-2.77119	-2.53698	-2.40498	-3.10972	-2.80584	0.0278697	0.0554786	0.0869673	0.126707
b1176	minC	chr	-	1224607	1225303	-1.10922	-1.47093	-1.60611	-1.86795	-1.98449	-2.00002	-1.58034	-1.76611	-1.29451	-1.43022	-1.95259	-1.57745	0.0553853	0.0894455	0.0879154	0.127838
b0607	uspG	chr	-	640661	641090	1.48517	1.83618	1.4058	0.174955	0.509939	0.997917	1.42266	0.997852	2.17175	1.57269	0.443436	1.34558	0.0317064	0.0608388	0.0891237	0.129174
b3912	cpxR	chr	-	4102994	4103693	0.354816	0.10062	0.704944	0.25778	0.469782	0.144219	1.06924	0.45603	1.06732	0.381375	0.333723	0.843536	0.661727	0.702289	0.0891047	0.129174
b1716	rplT	chr	-	1797416	1797773	0.19347	0.278773	0.296785	0.253538	0.295283	0.270254	-0.0673164	-0.0273044	0.187684	0.258494	0.272672	-0.0253747	0.663321	0.703479	0.0891813	0.129174
b0886	cydC	chr	-	926696	928418	-0.840096	-0.705838	-1.01815	-0.616986	-0.366719	-0.479405	-0.717127	-1.20663	-1.47835	-0.886049	-0.47848	-1.05722	0.0362165	0.066658	0.0893122	0.129238
b0196	rcsF	chr	-	219590	219995	0.983715	1.48632	1.33127	1.44364	2.07849	2.09406	1.45933	1.19354	1.1625	1.27631	1.81633	1.30188	0.0892104	0.130707	0.0905859	0.130827
b3247	rng	chr	-	3394347	3395817	-1.86852	-1.51533	-1.66473	-2.30088	-1.97909	-2.03224	-1.80703	-1.80521	-1.78286	-1.68017	-2.09889	-1.79242	0.0420378	0.0735539	0.0908799	0.130871
b3633	waaA	chr	+	3806562	3807840	-2.00729	-1.78161	-1.75359	-1.645	-1.53084	-1.53385	-2.66149	-2.46548	-1.83781	-1.83928	-1.57153	-2.417	0.0561327	0.090261	0.0908804	0.130871
b1344	ttcA	chr	-	1409036	1409972	0.841149	0.714557	0.785556	2.02663	1.53121	1.31242	1.04626	1.05783	0.904463	0.769314	1.64604	1.01186	0.0536384	0.0873824	0.0920256	0.132392
b0800	ybiB	chr	+	834470	835433	0.799698	1.08638	1.04661	0.576732	0.0860827	-0.606686	0.543317	1.21172	1.13024	0.984489	0.0834366	0.822922	0.0995017	0.142734	0.0926797	0.133205
b3475	acpT	chr	+	3610991	3611579	-1.64888	-1.60318	-1.66893	-0.598182	-1.15893	-0.479405	-1.10005	-1.48579	-1.36628	-1.64405	-0.857884	-1.29508	0.0495877	0.0826652	0.0936262	0.134435
b2685	emrA	chr	+	2809448	2810621	0.202213	0.0638622	0.314947	1.81815	0.965514	1.13727	0.679295	0.819226	-0.0703483	0.197631	1.27034	0.579263	0.0421732	0.0737042	0.0940067	0.134852
b3804	hemD	chr	-	3987110	3987851	-2.30023	-2.05579	-1.89997	-2.34111	-2.73559	-2.4477	-2.29394	-2.21483	-1.88176	-2.05757	-2.56175	-2.20014	0.063186	0.0986205	0.0941936	0.13499
b4498	gatR	chr	-	2167716	2169751	-1.9538	-1.33397	-1.93582	-1.78715	-2.6146	-1.83642	-1.24736	-1.29613	-1.28031	-1.74042	-2.20384	-1.26554	0.375647	0.429711	0.0948723	0.135832
b3821	pldA	chr	+	4002884	4003754	-0.487559	0.0811384	0.323767	1.51119	0.449985	0.751047	0.214627	0.234387	-0.29887	-0.0103133	0.8293	0.127021	0.083357	0.123849	0.0954757	0.136433
b0054	imp	chr	-	54754	57109	-0.035162	0.0314142	0.264939	0.107709	0.259075	0.165442	0.070064	0.0570897	-0.132981	0.0979852	0.186499	0.0266907	0.439689	0.492339	0.0954092	0.136433
b2193	narP	chr	+	2288521	2289169	-0.00893038	0.0443132	0.288263	-0.451862	-0.429869	-0.402237	-0.0254449	-0.151906	-0.332124	0.102527	-0.434075	-0.12664	0.0255718	0.0523028	0.0975184	0.139185
b1738	chbB	chr	-	1819322	1819643	-0.567445	0.620487	-0.988374	-2.81862	-2.37986	-1.53971	-1.26051	-1.32073	-0.989312	-0.468647	-2.36876	-1.13383	0.0367934	0.0673613	0.0975885	0.139185
b0354	yaiL	chr	+	375995	376535	-0.145212	-0.107613	0.0552864	-0.105127	-0.473187	-0.422559	-0.0977774	-0.100391	0.120631	-0.0598917	-0.336261	-0.0889347	0.131027	0.175923	0.0992092	0.141361
b3842	rfaH	chr	-	4022355	4022844	-0.961323	-0.990457	-1.45889	-0.58784	-0.262022	-0.386296	-0.543097	-0.782282	-1.01788	-1.19281	-0.416277	-0.735478	0.0265236	0.0536599	0.0996313	0.141804
b2697	alaS	chr	-	2817402	2820033	0.209288	0.193341	0.306514	0.22115	0.32489	0.107984	0.32373	0.366006	0.523981	0.240261	0.248917	0.372793	0.814134	0.838924	0.0997106	0.141804
b3191	yrbB	chr	-	3334984	3335278	-1.46236	-1.74394	-2.26584	-1.19607	-1.24643	-1.19561	-1.83217	-2.31868	-1.51319	-1.8738	-1.20109	-1.96137	0.12102	0.165776	0.101414	0.143952
b4203	rplI	chr	+	4424130	4424580	1.49539	1.48326	1.32898	1.64268	1.68728	1.56856	1.35703	1.39803	1.58658	1.43368	1.6485	1.40845	0.0451261	0.0775897	0.102308	0.144944
b2618	yfjF	chr	-	2752029	2752320	-1.59049	-1.2975	-1.31635	-0.883616	-1.23574	-1.33813	-1.75883	-1.73465	-1.28236	-1.3812	-1.12462	-1.70963	0.21922	0.273612	0.10227	0.144944
b1238	tdk	chr	+	1292749	1293367	0.833093	0.558149	0.874525	1.04775	1.3621	1.88892	0.738013	0.411473	1.11753	0.74511	1.31706	0.67423	0.0946508	0.136963	0.103389	0.146059
b0219	yafV	chr	-	239418	240189	-1.4795	-0.245822	-1.00036	-1.73984	-1.64464	-2.34977	-1.25359	-1.57438	-1.18438	-0.909251	-1.81007	-1.33532	0.0892737	0.130707	0.104161	0.14698
b2063	yegH	chr	+	2135925	2137509	-0.860804	-0.972708	-0.718774	-0.609108	0.113017	-0.488866	-1.15607	-0.700108	-0.872902	-0.857863	-0.273525	-0.934787	0.133681	0.178682	0.104238	0.14698
b2394	insL	chr	+	2512352	2513465	-1.44331	-1.31434	-1.58841	-1.49216	-1.63706	-0.733722	-1.86025	-2.41273	-1.80376	-1.47074	-1.44663	-2.04566	0.628861	0.672199	0.104754	0.147568
b1061	dinI	chr	-	1120464	1120710	-2.21971	-2.004	-1.36568	-1.57962	-1.73151	-1.3737	-1.87128	-1.76551	-1.87443	-1.85023	-1.61408	-1.84349	0.365109	0.420454	0.104878	0.147571
b2194	ccmH	chr	-	2289379	2290432	-1.26463	-2.15474	-2.10134	-1.99618	-1.09805	-1.87172	-2.69464	-2.20156	-2.25235	-1.96511	-1.64731	-2.45529	0.669796	0.708328	0.104955	0.147571
b3440	yhhX	chr	-	3577790	3578828	1.89862	1.44894	0.625767	0.728106	0.566318	0.697835	1.28698	0.922676	0.850016	1.13197	0.643735	1.06708	0.216783	0.271024	0.105769	0.148576
b3539	yhjV	chr	+	3698585	3699857	-0.849166	-0.482577	0.259659	-0.561845	-0.225185	-0.000237402	-0.713022	-0.962498	-1.88695	-0.353224	-0.332378	-1.07215	0.811769	0.837067	0.105923	0.148651
b1098	tmk	chr	+	1154346	1154988	-1.06994	-1.5396	-0.775319	-0.855773	-0.617188	-0.0534794	-1.3726	-0.964849	-1.00639	-1.1205	-0.618656	-1.1723	0.130288	0.175247	0.108695	0.152112
b0386	proC	chr	-	404058	404868	1.61715	1.38484	1.28235	1.23828	0.699812	0.412245	1.72112	1.70583	1.00404	1.39486	0.809529	1.57998	0.101678	0.14488	0.109832	0.153415
b2959	yggL	chr	-	3099828	3100155	0.519052	0.716546	0.356807	1.22908	0.787001	0.459194	0.11047	0.138466	0.526724	0.533324	0.868257	0.183895	0.322305	0.377289	0.110077	0.153486
b2594	rluD	chr	-	2733052	2734033	0.636837	-0.218129	0.547587	0.712454	0.799843	0.42172	0.389475	0.428904	-0.0128402	0.245999	0.694625	0.340955	0.361611	0.416748	0.110089	0.153486
b2509	xseA	chr	+	2632253	2633624	-1.69088	-2.1627	-1.84088	0.280057	-0.274733	-0.979479	-1.40721	-0.914194	-1.41652	-1.94075	-0.235454	-1.25313	0.036415	0.0669407	0.111376	0.15499
b2690	yqaB	chr	-	2814958	2815525	-1.85684	-1.39103	-1.40561	-1.41829	-1.02134	-0.820811	-1.64485	-1.32507	-1.60729	-1.53126	-1.13426	-1.54249	0.118169	0.16277	0.113318	0.157119
b1282	yciH	chr	+	1340681	1341008	-0.283523	-0.161105	-0.466335	0.477962	-0.348734	2.08764	-1.02336	-1.31904	-1.19903	-0.315431	0.235569	-1.14753	0.281465	0.338804	0.113328	0.157119
b1856	yebA	chr	-	1938336	1939659	-0.146418	0.227943	-0.414884	-0.960556	-0.925578	-0.812125	-0.650738	-0.244781	-0.699254	-0.126887	-0.926561	-0.524885	0.0450192	0.0774954	0.114763	0.158517
b4178	nsrR	chr	+	4404212	4404638	-2.14214	-2.43169	-2.14585	-2.42222	-2.13597	-2.24022	-1.59463	-2.14499	-1.87582	-2.26081	-2.25673	-1.84473	0.84686	0.867842	0.114728	0.158517
b3839	tatC	chr	+	4020758	4021535	-2.35439	-2.43111	-2.34951	-1.31439	-1.61092	-2.12387	-2.15018	-2.33832	-2.37058	-2.37682	-1.59066	-2.26064	0.0970197	0.139577	0.115857	0.159881
b0016	insL	chr	+	15444	16557	-1.5995	-1.58487	-1.58706	-1.05687	-1.63041	-0.754028	-1.4946	-1.75759	-2.35936	-1.59754	-1.27761	-1.74355	0.226582	0.28162	0.116839	0.161087
b0754	aroG	chr	+	784855	785908	0.555294	0.522723	1.24387	0.260157	0.578335	0.794276	1.05574	0.811036	0.910286	0.780684	0.494848	0.921486	0.467161	0.518333	0.117635	0.162034
b3386	rpe	chr	-	3512403	3513081	1.4721	1.84878	1.92334	1.63149	2.62893	1.47457	0.908466	0.956932	1.01069	1.77058	1.93454	0.928903	0.705532	0.739295	0.11784	0.162166
b2303	folX	chr	+	2419346	2419709	0.835035	0.642764	0.221766	-0.102413	0.485212	0.590582	1.05251	0.8969	0.612525	0.513525	0.245086	0.92028	0.439765	0.492339	0.118135	0.162272
b3253	yhdH	chr	+	3401505	3402480	0.468907	0.710173	0.593231	-0.149547	0.354419	0.403137	0.636386	0.80652	1.78564	0.605415	0.158308	0.822105	0.147194	0.193444	0.11901	0.163172
b1608	rstA	chr	+	1680182	1680902	-2.08731	-2.08605	-2.06299	-2.00429	-1.91304	-1.95808	-2.00675	-2.14114	-2.25324	-2.06325	-1.95252	-2.10164	0.0357128	0.0660577	0.120293	0.164728
b3042	yqiC	chr	+	3182861	3183152	0.362105	1.01203	0.279586	1.88235	0.639309	1.43313	0.646598	0.18031	0.448355	0.531106	1.12436	0.396861	0.162356	0.211134	0.120366	0.164728
b4374	yjjG	chr	+	4606668	4607346	0.265679	-0.061134	0.388015	1.54027	0.335324	0.513608	-0.0239515	-0.0707513	-0.343135	0.185244	0.710035	-0.078657	0.247269	0.302783	0.120633	0.164943
b3608	gpsA	chr	-	3780664	3781684	-1.65718	-1.41743	-1.8611	-1.79264	-1.7407	-1.96778	-1.30887	-1.44457	-1.76519	-1.66185	-1.79817	-1.44852	0.284145	0.340654	0.120748	0.164949
b1340	ydaL	chr	+	1404002	1404566	-1.51549	-0.738862	-0.811496	-0.470656	0.443956	-0.247232	-0.648892	-0.518956	-1.42768	-1.00861	-0.04641	-0.756889	0.06652	0.102323	0.121976	0.166284
b1103	hinT	chr	+	1161107	1161467	0.528239	0.595254	0.772157	0.645569	0.32193	0.645291	0.616479	0.972558	1.0831	0.637527	0.488469	0.831721	0.513925	0.565166	0.122061	0.166284
b0394	mak	chr	+	409367	410276	0.590318	0.921559	0.421517	-0.187302	0.313418	-0.0837331	0.654953	0.971759	2.3949	0.619884	0.021347	0.898362	0.0409696	0.0725371	0.122325	0.166491
b3291	mscL	chr	+	3436045	3436456	1.12467	0.572433	0.828436	0.340459	0.603196	0.796587	0.938802	0.764438	1.36617	0.803156	0.528884	0.932511	0.277268	0.33513	0.123096	0.167388
b3434	yhgN	chr	+	3573093	3573687	-0.200642	0.547468	0.246585	-0.0102948	0.0955299	0.583331	-0.797087	-0.327468	0.0191499	0.228865	0.12875	-0.499383	0.934066	0.944853	0.123537	0.167835
b1099	holB	chr	+	1154984	1155989	-1.48883	-1.19327	-1.45498	-0.635593	-1.08978	-1.44288	-1.83038	-1.33304	-1.69663	-1.37451	-1.02244	-1.65491	0.300978	0.354835	0.123911	0.168189
b1214	ychA	chr	+	1266542	1267352	-1.30935	-1.70469	-1.83437	-1.13804	-1.13983	-1.2384	-1.32475	-1.88013	-1.52834	-1.64465	-1.15463	-1.53125	0.10084	0.143961	0.124287	0.168546
b1211	prfA	chr	+	1264234	1265317	0.815499	0.671059	0.42836	1.31446	1.40256	3.02713	0.427903	0.639742	0.44017	0.612928	1.56991	0.491893	0.144017	0.189859	0.124525	0.168714
b3785	wzzE	chr	+	3967053	3968100	-1.62458	-1.19371	-1.44107	-0.857239	-0.982386	-0.943443	-0.980503	-1.33379	-1.22684	-1.41406	-0.934641	-1.16576	0.0490611	0.0819888	0.125042	0.168954
b4065	yjcE	chr	+	4278002	4279652	-1.32224	-1.00988	-0.533449	-1.94453	-1.88936	-2.00297	-1.49063	-0.747919	-1.59752	-0.938643	-1.93523	-1.2475	0.0471189	0.0800914	0.127878	0.172474
b4377	yjjU	chr	+	4610433	4611507	-0.880095	-0.594613	-0.0857076	-1.0858	-1.49649	-1.61958	0.105737	0.469817	-1.18306	-0.500519	-1.37268	-0.0918833	0.0418126	0.0733844	0.128931	0.173736
b0197	metQ	chr	-	220112	220928	0.628765	0.439812	0.436623	0.357336	0.114898	0.316784	0.570697	0.329142	0.75281	0.482145	0.229568	0.505242	0.0737437	0.111931	0.13042	0.175267
b1640	anmK	chr	-	1716516	1717626	-1.34043	-0.749583	-1.35336	-1.99772	-1.78299	-2.10876	-1.22899	-1.01773	-1.86133	-1.15226	-1.90743	-1.32297	0.0370302	0.0674884	0.13138	0.176398
b0148	hrpB	chr	+	162104	164534	-1.95604	-2.1713	-2.07332	-1.70445	-1.90669	-2.43069	-2.51469	-2.59158	-2.52715	-2.09013	-1.91842	-2.51743	0.833198	0.85679	0.132135	0.177252
b0578	nfsB	chr	-	603993	604647	1.32237	1.25652	1.15916	1.32275	1.03067	1.02841	1.39189	1.25708	1.4064	1.23513	1.1295	1.33375	0.356949	0.412653	0.134034	0.179476
b2797	sdaB	chr	+	2927597	2928965	0.232757	0.288391	0.28601	0.245004	0.203995	0.249448	0.502726	0.516604	0.265661	0.271239	0.230862	0.472194	0.197125	0.248114	0.134362	0.179591
b0780	ybhK	chr	-	814961	815870	-2.22724	-1.94095	-1.86191	-2.46616	-2.21606	-2.45078	-2.0168	-2.17704	-2.29626	-1.99929	-2.33697	-2.09588	0.0609058	0.0956633	0.13451	0.179628
b2196	ccmF	chr	-	2290982	2292926	-2.05697	-1.52324	-2.09364	-1.31366	-0.622018	-2.08105	-2.30913	-2.53018	-2.15301	-1.88437	-1.21491	-2.3989	0.32326	0.37811	0.135253	0.180458
b1723	pfkB	chr	+	1804393	1805323	1.66609	2.08136	1.39104	1.09023	1.14198	1.27878	2.72992	1.6362	1.69519	1.69401	1.14409	2.10193	0.104659	0.148842	0.135802	0.181029
b0908	aroA	chr	+	958034	959318	0.294546	-0.26955	0.404932	0.804986	0.637049	0.881184	0.12828	0.313024	0.710744	0.105852	0.742786	0.31132	0.0814238	0.122095	0.137845	0.183587
b0711	ybgJ	chr	+	742815	743472	-1.03338	0.0383069	-0.816568	-1.58784	-0.795704	-1.418	0.169621	-0.329231	-1.10354	-0.666058	-1.20975	-0.264799	0.18406	0.234044	0.139605	0.185766
b2820	recB	chr	-	2950482	2954025	-2.0198	-1.95405	-1.97775	-1.68489	-1.16133	-1.57533	-2.40209	-1.69041	-1.83974	-1.94885	-1.40755	-2.0009	0.0833267	0.123849	0.140829	0.187227
b0094	ftsA	chr	+	103981	105244	-1.22011	-1.35663	-1.37008	-1.39668	-1.29195	-1.46796	-1.2286	-1.2887	-1.29642	-1.32467	-1.36392	-1.2486	0.374936	0.429446	0.141961	0.188563
b1033	ghrA	chr	+	1097108	1098047	2.22333	2.13487	1.9068	1.70563	1.21232	1.88276	2.00264	2.31826	1.8516	2.06673	1.49572	2.09454	0.119874	0.16451	0.14246	0.189057
b0239	frsA	chr	+	256526	257771	0.925887	0.538986	1.20044	1.19495	0.813457	1.45687	1.04187	0.4458	0.546009	0.868102	1.05582	0.718349	0.375745	0.429711	0.143118	0.189762
b0899	ycaM	chr	+	946451	947882	0.573334	0.321355	0.791463	-2.78048	-2.04443	-1.06437	-0.587492	-0.857758	-1.06555	0.541759	-2.23387	-0.776773	0.0294844	0.0577661	0.143569	0.19019
b3258	panF	chr	+	3405628	3407080	-0.675726	-0.167503	-0.866873	-0.324805	-0.449649	-0.710731	-1.84795	-1.57599	-0.596994	-0.582757	-0.441107	-1.56823	0.772511	0.801615	0.147172	0.19479
b1835	rsmF	chr	+	1918246	1919686	0.0719238	0.269015	0.506079	0.993556	1.49287	3.08538	0.396895	-0.0447561	1.09315	0.297752	1.48922	0.327198	0.124854	0.168784	0.148296	0.19593
b4394	yjjX	chr	-	4631255	4631768	-0.735567	-0.267038	-0.229443	-1.25476	-0.252038	-1.03462	-0.292691	-0.450456	0.245154	-0.39305	-0.884741	-0.309005	0.293724	0.34849	0.14829	0.19593
b2955	yggW	chr	+	3095288	3096425	-1.14222	-1.03345	-0.851766	-1.12736	-0.75106	-1.03101	-1.02497	-1.70915	-1.50313	-0.991094	-0.951173	-1.37852	0.795287	0.82292	0.148523	0.196056
b3536	bcsE	chr	+	3694480	3696052	-2.12298	-1.85703	-2.0513	-2.39881	-2.71923	-2.96127	-2.31709	-2.53018	-1.88413	-1.98819	-2.64086	-2.28002	0.0346964	0.0648167	0.148784	0.196226
b1036	ycdZ	chr	+	1099518	1100010	-2.16272	-1.86056	-1.82751	-1.45034	-1.15984	-2.004	-2.01935	-1.91808	-2.29018	-1.93951	-1.44777	-1.97731	0.232867	0.288228	0.149246	0.196662
b1727	yniC	chr	+	1807403	1808072	0.496886	0.735405	0.206262	0.741987	0.991519	0.929608	0.579214	0.217718	0.785641	0.431864	0.899236	0.48339	0.0989609	0.142232	0.149459	0.196767
b0826	moeB	chr	-	863602	864352	-1.41503	-1.0645	-1.2786	-0.58784	0.442376	-0.327402	-0.670712	-1.00332	-0.83646	-1.2584	-0.132741	-0.800166	0.0594457	0.0939646	0.150073	0.197227
b2524	iscX	chr	-	2654557	2654758	0.498357	0.123108	-0.0365509	-0.151741	0.0997463	0.645291	-0.297985	-0.0383299	-0.726277	0.118128	0.0839828	-0.310946	0.992676	0.993344	0.150524	0.197646
b2075	mdtB	chr	+	2153286	2156409	-1.3504	-1.50614	-1.13253	-1.32481	-0.902619	-1.03462	-2.29798	-1.23152	-1.73282	-1.33314	-1.09122	-1.79991	0.2176	0.271817	0.150904	0.197971
b1381	ydbH	chr	+	1441074	1443714	-1.5093	-1.39577	-2.08291	-1.16757	-1.57999	-0.952722	-2.20037	-1.68469	-1.40435	-1.71625	-1.33073	-1.85412	0.203104	0.255208	0.152929	0.200273
b1585	ynfC	chr	-	1654770	1655481	-1.04138	-1.19665	-1.14329	-1.78144	-1.77077	-1.12577	-1.46791	0.201621	-0.13426	-1.12716	-1.66677	-0.766483	0.179918	0.229561	0.153276	0.200551
b4382	deoA	chr	+	4616251	4617574	1.10492	1.36079	0.975521	-0.0119224	0.713087	0.662728	1.22558	1.17189	0.597065	1.12873	0.399323	1.07916	0.0790269	0.119275	0.154334	0.201582
b3529	yhjK	chr	-	3681652	3683608	-1.2113	-1.17637	-1.79158	-2.31941	-1.91208	-1.99144	-1.66493	-1.90258	-1.8571	-1.42704	-2.05589	-1.79693	0.0547861	0.0888536	0.156159	0.203787
b1004	wrbA	chr	-	1066334	1066931	0.71054	0.924388	2.00947	-0.256326	0.365251	-0.35165	1.4649	0.830426	0.0566246	1.19394	0.0077542	0.928648	0.0637244	0.0989423	0.156491	0.204041
b1912	pgsA	chr	-	1990292	1990841	-0.0697576	0.23433	-0.16951	-0.359157	-0.377236	-0.525002	-0.400638	0.0250322	0.059704	-0.0168053	-0.38886	-0.191089	0.0578335	0.0923971	0.156651	0.204071
b3634	coaD	chr	+	3807847	3808327	0.0703975	-0.593539	-0.46182	-0.460867	-0.521265	-0.0975346	0.757935	-0.197319	0.131286	-0.383022	-0.432696	0.236245	0.903587	0.917763	0.157597	0.205124
b0868	ybjS	chr	-	904962	905976	-1.55692	-1.43696	-0.894429	-0.831765	-0.737432	-0.930512	-1.11578	-2.17199	-1.32189	-1.2786	-0.791334	-1.54839	0.143182	0.189238	0.15804	0.205521
b3237	argR	chr	+	3382724	3383195	-0.7088	-0.812923	-0.900348	-0.665967	-0.476604	-0.599482	-1.02271	-1.05083	-0.597385	-0.835272	-0.565151	-0.940771	0.0444576	0.0769737	0.158394	0.205802
b2323	fabB	chr	-	2438406	2439627	0.255634	0.288817	0.272328	0.671272	0.662481	0.446534	0.419994	0.509721	0.142076	0.270796	0.627095	0.406165	0.0464647	0.0793777	0.160776	0.208533
b0142	folK	chr	-	157252	157732	-0.779263	-1.48695	-1.58278	-0.674551	0.503513	-0.587046	-0.787023	-1.11515	-1.237	-1.34	-0.241779	-1.00725	0.096423	0.139257	0.161179	0.208873
b1482	osmC	chr	+	1554648	1555080	0.71831	-0.198052	0.599102	-0.794291	-0.855598	0.0399689	0.479623	0.281848	-0.380304	0.317102	-0.691945	0.240436	0.0894397	0.130821	0.163661	0.211588
b0109	nadC	chr	-	117751	118645	0.466466	0.371603	0.974945	0.747061	0.475711	0.00602159	0.547811	0.946797	1.22929	0.613263	0.447985	0.782206	0.534373	0.585921	0.164923	0.212984
b2829	ptsP	chr	-	2964209	2966456	-1.20741	-1.32038	-1.3955	-1.17826	-1.26543	-1.35335	-1.6621	-1.6665	-1.27339	-1.3331	-1.25342	-1.60357	0.602256	0.647714	0.16512	0.213054
b3836	tatA	chr	+	4019967	4020237	-0.0261627	0.308547	0.142299	-0.29843	-0.0797758	-0.18726	-0.181705	0.133674	0.154141	0.149466	-0.189755	-0.0415422	0.0548398	0.0888536	0.166882	0.214955
b3213	gltD	chr	+	3357219	3358638	-0.234553	-0.323429	-0.344195	-0.254416	-0.31141	-0.923505	-0.070916	-0.244781	0.137545	-0.309027	-0.385599	-0.122693	0.45804	0.510113	0.167561	0.215643
b0641	rlpB	chr	-	670827	671409	-1.04509	-1.13404	-1.06577	-1.34383	-1.15253	-1.66844	-1.18489	-1.17219	-0.695232	-1.0871	-1.32234	-1.12132	0.175182	0.225053	0.168303	0.21641
b1452	yncE	chr	+	1521330	1522392	-0.679181	-0.450593	0.0232494	-0.623147	-0.687738	-1.04729	-0.57656	-0.0490563	0.878875	-0.354187	-0.726909	-0.185675	0.17683	0.226592	0.169063	0.2172
b3627	rfaI	chr	-	3800061	3801081	-0.388311	-1.05124	-0.377114	-0.465981	-0.957167	-0.894443	-0.720254	0.164404	-0.191688	-0.644785	-0.79479	-0.393493	0.575118	0.626403	0.171387	0.219618
b4290	fecB	chr	-	4511428	4512331	0.09248	-0.237402	-0.111164	-0.302085	0.336237	0.0387258	-0.382106	-0.599446	-1.98546	-0.0941139	0.0389118	-0.831972	0.63435	0.67758	0.171369	0.219618
b0048	folA	chr	+	49822	50302	-0.609406	-0.30064	-0.237457	0.621507	0.250954	-0.00656329	-0.378711	-0.0513077	0.134178	-0.367687	0.332168	-0.173974	0.0450025	0.0774954	0.178847	0.228587
b2496	hda	chr	-	2616096	2616843	-3.1628	-3.33245	-3.49059	-2.22011	-2.53351	-2.82442	-2.93038	-2.62038	-3.22172	-3.37942	-2.48508	-2.88237	0.0258596	0.0526024	0.18108	0.231242
b3197	kdsD	chr	+	3339287	3340274	0.36982	0.323831	-0.141013	0.622727	0.35963	0.311499	0.286978	0.279044	-0.169884	0.14821	0.429406	0.212293	0.277287	0.33513	0.182798	0.233036
b2249	yfaY	chr	-	2360452	2361655	0.213099	0.296863	-0.11107	-0.716522	-0.312555	0.447531	1.04187	0.132224	0.366169	0.0985341	-0.365759	0.533695	0.445731	0.498269	0.184175	0.23459
b3203	hpf	chr	+	3344194	3344482	0.639236	0.909119	0.589641	0.0107976	0.263499	0.595782	0.488611	0.518063	0.979494	0.703759	0.207446	0.580746	0.114005	0.158205	0.184787	0.23517
b1618	uidR	chr	-	1694485	1695076	-0.15447	0.999998	-0.408	-1.52934	-1.29345	0.100692	0.0735739	-0.398732	0.534988	0.0248472	-1.20284	0.00807366	0.191865	0.242107	0.186861	0.237403
b2777	ygcF	chr	-	2902768	2903440	-1.22844	-1.31508	-1.6658	-0.626314	-0.266776	0.323084	-0.818596	-0.650708	-0.713735	-1.40337	-0.311536	-0.768845	0.0311337	0.0599087	0.188313	0.239028
b0767	pgl	chr	+	797808	798804	1.3969	1.47712	1.44661	1.11377	1.43286	1.15183	2.09807	2.20743	1.20671	1.45122	1.26743	1.95463	0.169931	0.219071	0.189163	0.239713
b1834	yebT	chr	+	1915533	1918167	-0.979091	-0.860038	-0.497639	-1.10509	-0.464211	-0.753166	-1.08297	-1.18338	-1.12025	-0.758261	-0.77029	-1.1061	0.984853	0.987506	0.193142	0.244548
b2743	pcm	chr	-	2866914	2867541	-1.70012	-1.25455	-1.47654	-1.50658	-1.00533	-1.5094	-1.57689	-1.61209	-1.77071	-1.47384	-1.29287	-1.63169	0.555184	0.607398	0.194939	0.246477
b4162	orn	chr	+	4389626	4390172	0.131091	0.0280386	0.182662	0.291184	0.0622311	0.0378823	0.103266	-0.0804715	-0.272644	0.125547	0.131502	-0.0431454	0.869409	0.887852	0.194997	0.246477
b2686	emrB	chr	+	2810637	2812176	-2.66226	-2.02603	-1.75534	-1.03292	-1.36894	-1.96249	-2.01968	-1.59904	-2.49181	-2.13253	-1.35522	-1.97507	0.144007	0.189859	0.195406	0.246786
b0452	tesB	chr	-	473524	474385	0.272733	0.117012	0.10493	0.0585232	-0.104292	-0.511827	0.117565	0.161279	0.135461	0.152093	-0.126792	0.16014	0.16585	0.214554	0.19572	0.246812
b2327	yfcA	chr	-	2442772	2443582	-1.55922	-1.33263	-1.52303	-1.06589	-1.57113	-1.69996	-2.07915	-2.00332	-1.49181	-1.46174	-1.42176	-1.95707	0.908989	0.921993	0.197891	0.249289
b2783	chpR	chr	-	2909112	2909361	-0.681264	-1.03503	-0.318436	-0.804415	-0.959902	-0.801333	-0.416405	-0.297522	1.31554	-0.682798	-0.867901	-0.223511	0.485469	0.537845	0.198374	0.249687
b3556	cspA	chr	+	3718071	3718284	-1.95618	-2.10152	-2.00555	-1.95016	-1.78787	-1.32252	-2.4223	-2.27702	-1.70104	-2.0089	-1.77241	-2.293	0.21345	0.267532	0.199648	0.251078
b0492	ybbN	chr	-	516648	517503	0.843982	0.672767	0.929843	0.0315228	0.499529	0.0145493	1.25606	0.869476	0.16957	0.81593	0.197667	0.902468	0.0396855	0.0708534	0.201246	0.252873
b2317	dedA	chr	-	2432103	2432763	-0.0764914	0.336195	-0.046621	0.534332	0.405155	0.246834	0.360978	-0.0332766	-0.491812	0.0575613	0.415544	0.0305469	0.120506	0.165225	0.202055	0.253676
b0091	murC	chr	+	100764	102240	-1.30716	-1.06875	-1.47179	-0.643233	-0.857578	-1.23201	-1.05668	-1.20262	-1.42357	-1.2932	-0.855951	-1.19051	0.158225	0.206665	0.206489	0.259024
b2564	pdxJ	chr	-	2699019	2699751	0.91069	0.895715	0.50917	0.334012	0.133317	0.380417	0.580839	0.972488	0.318054	0.723511	0.254154	0.676966	0.044211	0.0766359	0.207116	0.259374
b3096	yqjB	chr	+	3246460	3246844	-1.88937	-2.18497	-2.11163	-1.40969	-2.11659	-1.92351	-2.11099	-2.24478	-2.24388	-2.08303	-1.8531	-2.18473	0.370396	0.425884	0.207038	0.259374
b2582	trxC	chr	+	2716756	2717176	-0.635162	-0.840379	-0.977904	-1.70813	-1.95604	-2.93312	-1.50003	-1.7753	-1.30961	-0.853159	-2.05187	-1.52453	0.0577049	0.0922907	0.207486	0.259619
b3037	ygiB	chr	+	3177765	3178437	1.60652	1.92949	1.58525	1.22612	1.40365	1.90745	1.79477	2.08417	1.7534	1.71812	1.41452	1.87289	0.462099	0.513865	0.210049	0.262384
b0760	modF	chr	-	791538	793011	-0.895396	-1.26704	-2.0572	-2.27234	-2.10027	-2.88199	-2.39752	-1.58908	-1.75485	-1.60372	-2.3584	-1.93269	0.0800408	0.120628	0.214487	0.26748
b3464	ftsY	chr	-	3600772	3602266	-0.390698	-0.410913	-0.549658	-0.294858	-0.292229	-0.115632	-0.393099	-0.246621	-0.573072	-0.463704	-0.260185	-0.3693	0.0510375	0.0840651	0.214913	0.267787
b3805	hemC	chr	-	3987847	3988789	-0.554498	-0.512031	-0.661308	-1.02179	-1.42136	-1.4909	-1.01125	-0.800057	-1.25513	-0.587907	-1.29265	-0.970619	0.0287843	0.0567679	0.216007	0.268925
b3802	hemY	chr	-	3984708	3985905	-1.28855	-1.19193	-1.29249	-1.70941	-1.46581	-1.51428	-1.55659	-1.27846	-1.37111	-1.25005	-1.55956	-1.40114	0.0382729	0.069119	0.219461	0.272542
b1208	ispE	chr	-	1261248	1262100	-4.50034	-4.67043	-4.38001	-4.34323	-4.12169	-4.62132	-4.45294	-4.58338	-4.93172	-4.52147	-4.26475	-4.60057	0.418692	0.473014	0.22168	0.275068
b3973	birA	chr	+	4171104	4172070	-1.11749	-0.844805	-0.334652	-0.232547	0.00101234	-0.0319463	-0.48865	-0.993049	-0.105231	-0.742545	-0.0880382	-0.608038	0.0865775	0.127409	0.223199	0.276714
b1054	lpxL	chr	-	1114884	1115805	0.402782	0.443079	0.0177764	0.391064	0.444931	1.33935	0.197563	0.0411905	0.355469	0.249152	0.551449	0.170727	0.291554	0.347577	0.223378	0.276714
b3997	hemE	chr	+	4195738	4196803	1.02145	0.963184	0.524408	0.918051	1.25555	0.796926	0.583536	1.00344	0.363477	0.774816	1.02983	0.677537	0.502102	0.554211	0.223766	0.276754
b2516	yfgA	chr	-	2639852	2640866	-0.123838	-0.00400388	-0.140964	-0.0760616	-0.0712259	0.235865	-0.221374	-0.00534145	-0.62227	-0.0856966	-0.0205992	-0.223583	0.373232	0.428152	0.225208	0.278055
b2502	ppx	chr	+	2623136	2624678	-0.610036	-0.734971	-0.435502	-0.51745	-0.709314	-0.0878267	-0.750637	-0.623292	-0.87828	-0.604851	-0.533561	-0.694989	0.50299	0.554779	0.225038	0.278055
b3771	ilvD	chr	+	3951500	3953351	-0.0413758	-1.16169	-0.720032	-2.10908	-2.00463	-1.95967	-1.20401	-1.30632	-2.10225	-0.727562	-2.04819	-1.39302	0.0489125	0.0819888	0.226422	0.279323
b0610	rnk	chr	-	642779	643190	0.548587	1.54415	1.13084	-0.102413	-0.254203	-0.29385	0.700726	-0.316756	0.91418	1.07592	-0.216315	0.329704	0.0418424	0.0733844	0.227364	0.280253
b2250	yfaZ	chr	-	2361754	2362297	0.0290136	0.310729	0.116054	0.209971	0.446929	1.15114	0.0254145	0.341661	0.0106883	0.159551	0.459939	0.136579	0.247652	0.303002	0.227844	0.28038
b2709	norR	chr	-	2828796	2830311	-2.10643	-1.93275	-1.79729	-1.59427	-1.45029	-2.06437	-2.28852	-1.99201	-1.82506	-1.94005	-1.64424	-2.05694	0.326815	0.38137	0.227826	0.28038
b1284	yciT	chr	-	1341620	1342370	0.0209085	-0.466347	-0.660422	-0.415451	-0.837882	-0.785832	0.0260632	-0.607351	-0.453677	-0.42389	-0.690121	-0.291641	0.278698	0.336289	0.231521	0.284201
b4391	yjjK	chr	-	4626877	4628545	0.453191	0.603535	0.575353	0.65579	0.628536	0.497823	0.465237	0.594773	0.420826	0.557559	0.610134	0.508075	0.497653	0.549707	0.232626	0.285183
b3235	degS	chr	+	3380221	3381289	-1.87999	-1.90129	-1.68124	-1.50334	-2.04328	-1.27382	-1.67555	-2.03986	-2.40935	-1.82444	-1.73013	-1.94626	0.451217	0.503268	0.235364	0.287968
b2266	elaB	chr	-	2378743	2379049	-0.295279	-0.294005	-0.237711	-0.135772	-1.00085	-1.00822	-0.302738	0.186024	-0.512772	-0.267235	-0.723135	-0.181906	0.268285	0.325837	0.23596	0.28846
b2388	glk	chr	-	2506482	2507448	1.30501	1.21435	1.29787	1.20961	1.06141	1.10556	1.64406	1.9907	1.07329	1.26389	1.12055	1.64402	0.0580574	0.0925288	0.236839	0.289297
b1848	yebG	chr	-	1928480	1928771	-0.764722	-0.889401	-1.11706	-0.720542	-0.531629	0.0205212	-0.787023	-0.710004	-0.834281	-0.943225	-0.521404	-0.757607	0.132987	0.178348	0.238984	0.291678
b1414	ydcF	chr	+	1485258	1486059	-0.0555896	1.39884	0.531676	0.390134	-0.0635279	0.510541	0.802993	0.401582	2.05251	0.568744	0.192732	0.752436	0.510493	0.561807	0.241235	0.293703
b2107	yohN	chr	+	2184981	2185320	-1.123	-1.27669	-1.32695	-1.08874	-1.07718	-0.874037	-1.02186	-1.16039	-1.26186	-1.24759	-1.04598	-1.11608	0.0703588	0.107011	0.243151	0.295794
b3614	yibQ	chr	+	3786123	3787083	-0.788089	-1.21416	-1.41981	-0.771004	-0.811361	-0.756245	-1.36308	-0.718152	-1.809	-1.18947	-0.795114	-1.27088	0.190846	0.24123	0.243765	0.296299
b3868	glnG	chr	-	4051891	4053301	-0.765045	-1.46121	-1.39439	-1.48724	-1.20527	-1.1822	-0.832604	-1.03599	-1.30739	-1.29785	-1.29583	-1.00864	0.751868	0.782889	0.247054	0.300051
b3338	chiA	chr	-	3465181	3467875	-0.707169	-1.46795	-1.34331	-1.82635	-1.68711	-2.00297	-1.46727	-0.64144	-1.78286	-1.26115	-1.78843	-1.27063	0.0909463	0.132634	0.248695	0.301798
b2529	iscU	chr	-	2657924	2658311	1.42594	1.23349	1.57473	1.67049	1.74158	1.80447	1.78454	1.44313	1.25492	1.4121	1.72239	1.55695	0.0649991	0.100816	0.251876	0.30541
b3731	atpC	chr	-	3913575	3913995	-1.74327	-1.73611	-1.75978	-1.79891	-1.72395	-1.67766	-1.78326	-1.77661	-1.8071	-1.74867	-1.7408	-1.77596	0.752602	0.783106	0.253358	0.306957
b4161	rsgA	chr	-	4388479	4389532	-1.55502	-1.25407	-1.19077	-1.10674	-0.929576	-0.676297	-0.854539	-1.30447	-1.40246	-1.31932	-0.944291	-1.09651	0.0637197	0.0989423	0.254532	0.307878
b2039	rfbA	chr	-	2108161	2109043	1.92808	1.88284	2.2104	2.35808	2.00877	2.03352	1.7272	1.51011	2.19614	2.01495	2.13015	1.70631	0.453523	0.505461	0.254779	0.307927
b0085	murE	chr	+	93165	94653	-1.97955	-1.97749	-2.01385	-1.49559	-1.63261	-1.91017	-1.90608	-1.7015	-2.09341	-1.9984	-1.63088	-1.86387	0.124269	0.168329	0.255373	0.308145
b3017	sufI	chr	-	3159278	3160691	-0.826637	-0.747148	-1.09432	-0.810232	-0.610786	-0.702911	-0.793641	-0.933046	-1.66223	-0.910764	-0.685239	-1.00658	0.2242	0.279359	0.255251	0.308145
b3843	ubiD	chr	+	4023010	4024504	-0.381451	-0.171923	-0.214098	-0.863474	-1.27972	-1.51304	-0.743396	-0.787392	-1.18023	-0.244262	-1.19248	-0.825468	0.0269153	0.054158	0.257639	0.310627
b1292	sapC	chr	-	1351651	1352542	-0.765384	-1.16964	-1.56846	0.260157	-0.827926	-1.02315	-0.967068	-0.911797	-1.57693	-1.22788	-0.536507	-1.03374	0.255577	0.31193	0.261705	0.315274
b1145	ymfK	chr	-	1201481	1202156	-2.42962	-2.54053	-2.53354	-2.60259	-2.57863	-2.10876	-2.82505	-2.57256	-2.63494	-2.49285	-2.51064	-2.70948	0.704161	0.738377	0.26257	0.316061
b4390	nadR	chr	+	4625337	4626570	-0.701851	-0.173929	0.133127	-1.16654	-1.14795	-0.965804	-0.685008	0.274458	-1.05324	-0.227704	-1.12692	-0.487714	0.0656164	0.101562	0.26405	0.317585
b4179	rnr	chr	+	4404676	4407118	0.315893	-0.020977	0.131949	-0.336004	-0.283396	-0.192952	0.0120298	0.0991737	-0.329327	0.119047	-0.284899	-0.0285333	0.0358602	0.066248	0.265628	0.318968
b3052	rfaE	chr	-	3193341	3194775	0.701325	0.283985	0.565477	0.658399	1.26623	0.762033	0.700935	0.592674	0.540142	0.496339	0.928958	0.655927	0.178122	0.227563	0.266245	0.319451
b3201	lptB	chr	+	3341965	3342691	-0.150936	0.469927	0.0405025	0.799453	0.545333	0.314948	0.157182	0.614357	-0.222007	0.134906	0.582453	0.246504	0.138622	0.183965	0.271814	0.325608
b4587	insN	chr	+	269501	271413	-0.629986	-0.568148	-1.03253	-1.71122	-1.54171	-1.08373	-0.562081	-1.3897	-1.18306	-0.751686	-1.53704	-1.02462	0.0448359	0.0774486	0.272548	0.326225
b1794	yeaP	chr	+	1875738	1876764	-0.538875	-0.357804	-0.659548	-0.0332509	-0.625881	-0.295693	-0.594841	-0.480098	-0.638361	-0.552023	-0.364486	-0.589833	0.374874	0.429446	0.275513	0.328981
b1380	ldhA	chr	-	1439877	1440867	0.727116	1.67219	1.43713	1.87108	1.51901	1.32191	1.5318	1.34018	0.831683	1.28304	1.59918	1.3345	0.433991	0.488076	0.275364	0.328981
b2415	ptsH	chr	+	2531785	2532043	0.594946	0.612419	0.482737	0.826682	0.566061	0.888939	0.782859	0.540539	0.360223	0.567796	0.711028	0.612516	0.174108	0.224255	0.276839	0.330034
b2735	ygbI	chr	-	2858488	2859286	-0.815864	-0.651622	0.944598	-1.27972	-1.7282	-1.75951	-1.50444	-0.747919	-1.415	-0.2584	-1.59802	-1.17169	0.119222	0.163905	0.277537	0.330602
b3631	rfaG	chr	-	3803965	3805090	0.0915185	-0.629608	-0.267189	0.0902321	0.399043	0.0165523	0.180062	-0.385349	-0.0588526	-0.342158	0.190484	-0.0683386	0.160308	0.208652	0.278267	0.331207
b1000	cbpA	chr	-	1062077	1062998	0.910751	1.20899	1.33894	1.33485	0.32294	1.37815	1.59631	1.45471	1.49525	1.17371	0.808423	1.51797	0.731155	0.762922	0.280819	0.33371
b0738	tolR	chr	+	775071	775500	-1.44984	-1.64972	-1.77107	-0.972134	-1.55273	-1.17399	-1.30621	-1.43707	-2.16211	-1.64008	-1.29039	-1.49476	0.134641	0.179642	0.283077	0.336126
b0119	yacL	chr	+	134387	134750	0.228713	1.00487	0.292732	-0.976882	-0.326817	0.0979037	0.369127	-0.0707513	-0.131556	0.469133	-0.51408	0.134642	0.0881346	0.129421	0.28358	0.336454
b4125	dcuS	chr	-	4348053	4349685	-2.58721	-3.16822	-2.1888	-4.09911	-4.06006	-3.3863	-3.1746	-3.98369	-2.49181	-2.68743	-3.9716	-3.25987	0.0325402	0.0618804	0.285462	0.338418
b3281	aroE	chr	-	3428041	3428860	-0.335437	-0.47199	-0.603839	-0.470346	-0.709284	-0.430496	-0.101588	-0.509834	1.25414	-0.518614	-0.573433	-0.121773	0.600303	0.646313	0.29315	0.346704
b0892	rarA	chr	+	937216	938560	-0.774314	-1.35315	-1.29068	-0.885921	-0.736766	-0.876741	-1.62339	-1.03833	-0.8347	-1.20677	-0.812551	-1.34659	0.232644	0.288193	0.293392	0.346715
b2479	gcvR	chr	+	2597927	2598500	-2.08792	-1.70047	-1.5049	-2.36996	-2.03021	-2.42976	-2.04423	-2.16386	-0.81374	-1.73904	-2.26233	-1.96708	0.0789504	0.119275	0.295336	0.348459
b1087	yceF	chr	-	1145233	1145818	0.489139	0.427128	-0.00786305	-0.286184	0.517956	0.285575	0.328005	0.544746	0.644325	0.280206	0.191731	0.433081	0.675278	0.713619	0.297233	0.35042
b0052	pdxA	chr	-	52426	53416	-2.96703	-2.81083	-2.8051	-2.45392	-2.29782	-2.83078	-2.89486	-2.45777	-3.18326	-2.85106	-2.44841	-2.76162	0.160001	0.208435	0.299249	0.352424
b1250	kch	chr	-	1307039	1308293	-1.94827	-1.40454	-1.2246	-1.02782	-1.85263	-1.77486	-0.780137	-1.17969	-1.49181	-1.51095	-1.57796	-1.06145	0.943117	0.951049	0.299407	0.352424
b0243	proA	chr	+	260726	261980	-0.0687819	0.00622286	-0.0812726	-0.20264	-0.123554	-0.226119	0.0683373	0.0490126	-0.247052	-0.0464774	-0.170339	0.00302644	0.0308278	0.0596138	0.299838	0.352653
b3028	mdaB	chr	+	3170551	3171133	1.52858	1.18084	1.09712	1.45897	1.95597	1.70319	1.33457	1.79175	0.900505	1.22527	1.71219	1.40796	0.0889092	0.130429	0.301413	0.353947
b0356	frmA	chr	-	377685	378795	1.58189	1.53855	1.84152	1.82686	2.12418	1.85968	1.5206	2.05114	0.966382	1.66001	1.96651	1.56979	0.101324	0.144513	0.306895	0.359533
b1609	rstB	chr	+	1680905	1682207	-1.11837	-1.71795	-1.72563	-1.4279	-1.54533	-1.49877	-1.52149	-1.68558	-1.50631	-1.57512	-1.48599	-1.57547	0.895982	0.911906	0.308424	0.361041
b3463	ftsE	chr	-	3600101	3600770	-1.34536	-1.37043	-1.44682	-1.4489	-1.42745	-1.02784	-1.42716	-1.35619	-1.78318	-1.40841	-1.36855	-1.49548	0.596707	0.643838	0.310478	0.363159
b2794	queF	chr	+	2923369	2924218	0.495849	0.107357	0.0896484	1.21285	0.834254	0.637551	0.273038	0.578342	0.951131	0.202974	0.913581	0.496991	0.0392387	0.0703932	0.320518	0.373435
b3621	rfaC	chr	+	3794001	3794961	-1.08408	-0.906014	-1.40616	-1.13665	-0.848273	-1.30741	-1.68108	-1.43215	-1.00243	-1.15656	-1.05248	-1.50475	0.869963	0.887852	0.323438	0.376543
b4046	zur	chr	-	4257510	4258026	-0.52259	-1.00096	-0.456997	0.266821	-0.196548	0.132029	-0.0691662	0.0457344	-0.736925	-0.700562	0.0129686	-0.185887	0.0317542	0.060852	0.331396	0.385507
b0173	dxr	chr	+	193520	194717	-0.900622	-1.20047	-1.23033	-0.535793	-0.962176	-0.685131	-0.758826	-0.829743	-1.27213	-1.12078	-0.760185	-0.865848	0.0809827	0.121556	0.332646	0.386658
b3697	yidA	chr	-	3874162	3874975	0.669118	0.0273603	0.146674	0.947237	0.638355	0.980026	0.692446	0.466593	0.880327	0.202093	0.810563	0.599014	0.0808098	0.121419	0.339535	0.393745
b2701	mltB	chr	-	2822512	2823598	0.33954	0.905484	0.0201935	1.26336	0.243213	1.28685	0.903649	-0.101946	0.520432	0.334268	0.724819	0.469558	0.306881	0.361507	0.340269	0.394288
b3064	ygjD	chr	-	3207551	3208565	-0.114774	-0.23099	0.207774	0.364713	0.164729	0.335563	0.0898934	0.345629	-0.533575	-0.0462764	0.27299	0.0745224	0.109229	0.154309	0.3435	0.397681
b0420	dxs	chr	-	437538	439401	-0.929219	-0.575974	-0.577291	-0.81421	-1.08545	-0.927866	-0.713022	-0.372418	-1.03238	-0.677325	-0.957018	-0.658618	0.164241	0.213027	0.343731	0.397681
b1111	ycfQ	chr	-	1167422	1168055	-1.49858	-1.58897	-1.22757	-1.25266	-0.867944	-0.912365	-1.58178	-1.34115	-0.889776	-1.44372	-1.01939	-1.44546	0.0593823	0.0939646	0.345887	0.399864
b2315	folC	chr	-	2429695	2430964	0.0117479	0.0297943	-0.104394	0.156601	0.155589	-0.299113	-0.021036	-0.335254	-0.211304	-0.0415503	0.0609985	-0.172873	0.885301	0.901651	0.348147	0.402165
b3238	yhcN	chr	+	3383559	3383823	-1.40395	-1.3224	-1.70218	-1.61481	-1.46644	-1.91661	-1.61573	-1.58022	-0.692406	-1.49344	-1.60549	-1.52192	0.341872	0.397383	0.350641	0.404418
b0475	hemH	chr	+	497278	498241	-0.466558	-0.0758968	0.354341	0.0688585	0.125494	0.0876354	0.109519	-0.137866	-1.51453	-0.0447583	0.106614	-0.348964	0.576846	0.627409	0.351706	0.405334
b3465	rsmD	chr	+	3602415	3603012	-1.25861	-1.7145	-0.930649	-0.986003	-1.01917	-0.92141	-1.51139	-0.840884	-1.28236	-1.31701	-0.978484	-1.21399	0.287392	0.343716	0.352887	0.40638
b1424	mdoD	chr	+	1494879	1496535	-0.358098	-0.562551	-0.551777	-0.680286	-1.42689	-1.59622	-0.863048	-0.822239	-1.00738	-0.508019	-1.22576	-0.879789	0.111364	0.156435	0.353529	0.406804
b2965	speC	chr	-	3105041	3107177	-0.123838	0.495516	0.114555	0.403115	0.545333	0.225139	-0.806132	0.452372	0.1653	0.161089	0.445705	-0.245227	0.340994	0.396672	0.355375	0.408612
b0087	mraY	chr	+	96001	97084	-1.45224	-1.26186	-1.1771	-1.0236	-1.04319	-1.07374	-1.21422	-1.10246	-1.02171	-1.28148	-1.03115	-1.1766	0.0870721	0.127987	0.359007	0.412291
b1356	racR	chr	-	1417788	1418265	-3.34188	-3.19332	-3.20726	-3.65896	-3.73041	-3.06437	-3.37816	-3.41471	-2.60284	-3.25084	-3.5882	-3.17537	0.378489	0.432517	0.359128	0.412291
b1139	lit	chr	+	1197917	1198811	-0.922819	-0.655394	-0.862441	-0.749303	-1.06295	-0.64933	-0.905668	-0.492708	1.3026	-0.798547	-0.880532	-0.593769	0.965153	0.970367	0.364562	0.418207
b2619	yfjG	chr	-	2752309	2752786	-0.225158	-0.393152	-0.16921	0.234957	0.0426625	-0.170496	-0.663695	-0.623292	0.306421	-0.271091	0.0744661	-0.54331	0.108941	0.154049	0.374512	0.428961
b3412	bioH	chr	-	3542095	3542866	0.253166	-0.404542	-0.371346	0.579617	0.187018	0.316454	0.151322	0.35856	0.162499	-0.245876	0.344174	0.211796	0.112804	0.157493	0.37651	0.430726
b4328	iadA	chr	-	4556376	4557549	0.367072	1.35257	0.505595	1.33592	1.1619	0.781304	0.95468	1.08185	0.576668	0.711312	1.14836	0.926435	0.387072	0.440971	0.376632	0.430726
b1233	ychJ	chr	-	1287896	1288355	-0.788863	-0.300568	-0.335022	-0.501376	-0.565504	0.0425475	-0.651911	-0.928919	-0.257757	-0.449882	-0.441337	-0.726843	0.621576	0.665368	0.378109	0.432084
b3911	cpxA	chr	-	4101624	4102998	-1.51522	-1.30139	-1.67262	-1.90396	-1.99002	-1.76036	-1.6026	-1.31474	-2.03238	-1.51814	-1.9192	-1.53067	0.047423	0.0804605	0.379088	0.43287
b2124	yehS	chr	-	2209747	2210218	-0.720842	-0.543778	-1.20129	0.0526178	-0.778089	-0.0935141	-1.13699	-0.239964	-0.52988	-0.843363	-0.394092	-0.734727	0.168917	0.218141	0.380256	0.433103
b1525	yneI	chr	-	1611338	1612727	0.773158	0.663173	1.31741	1.18709	1.15944	1.06808	1.09845	1.14224	0.686106	0.910755	1.17043	1.03704	0.390052	0.443687	0.38012	0.433103
b3226	nanR	chr	-	3371719	3372511	-0.599866	-0.573141	-1.05193	-0.573485	-0.517861	-0.64933	-0.928751	-1.34318	-0.391352	-0.764927	-0.539572	-0.98409	0.409214	0.463009	0.380456	0.433103
b2551	glyA	chr	-	2682275	2683529	1.6377	1.76626	1.62285	1.49216	1.52199	1.56596	1.63223	1.53554	1.53043	1.67513	1.51903	1.58437	0.063665	0.0989423	0.383538	0.436278
b4388	serB	chr	+	4622917	4623886	-0.798918	-0.886063	-0.603839	-0.731431	-0.241558	-0.915312	-0.948651	-0.781474	-0.823434	-0.750462	-0.571547	-0.861925	0.58796	0.637635	0.385899	0.438628
b0675	nagD	chr	-	698796	699549	0.0525606	0.377642	-0.162985	-0.201097	-0.177214	-0.280096	0.0405612	-0.0179768	-0.31637	0.0765915	-0.211063	-0.0556089	0.184611	0.234344	0.387598	0.440223
b3347	fkpA	chr	-	3474628	3475441	0.418732	0.445984	0.31705	0.447576	0.243005	0.689216	0.311157	0.165091	0.450574	0.395253	0.391892	0.266612	0.666029	0.705346	0.388746	0.441191
b0031	dapB	chr	+	28373	29195	0.483928	0.459144	0.268496	0.152516	0.553553	-0.473173	0.263627	0.514211	0.434539	0.370939	0.19027	0.356268	0.389489	0.443387	0.389433	0.441634
b2687	luxS	chr	-	2812239	2812755	0.69003	0.817981	0.541415	1.07875	0.745423	0.907915	0.891697	0.833941	0.659004	0.673428	0.887044	0.831458	0.14543	0.191463	0.390295	0.442275
b1923	fliC	chr	-	2000133	2001630	-1.93888	-1.68933	-1.86215	-2.41623	-2.13427	-1.75625	-1.88013	-2.18946	-1.28236	-1.82823	-2.1734	-1.95948	0.289379	0.345815	0.391721	0.443553
b2325	yfcL	chr	-	2441912	2442191	-0.874152	-1.4354	-1.05537	-1.23857	-0.984684	-0.763973	-1.02161	-1.17199	-1.25303	-1.17913	-1.04751	-1.11292	0.590335	0.639279	0.392302	0.443874
b2214	apbE	chr	-	2308500	2309556	-1.36742	-0.708548	-1.67527	-0.642288	-0.616518	-0.511827	-1.43885	-0.578438	-0.640955	-1.29842	-0.604156	-1.08435	0.144083	0.189859	0.397425	0.449329
b4235	pmbA	chr	+	4455981	4457334	1.23426	0.561515	0.924721	0.14596	0.286957	0.605018	0.643839	0.41445	0.432341	0.854101	0.286798	0.539032	0.0849316	0.125831	0.398876	0.450627
b1143	ymfI	chr	+	1200719	1201061	0.366128	-0.772057	-0.603839	-0.807888	-0.640534	-0.270819	-0.236584	-0.807717	1.42705	-0.456571	-0.655826	-0.314244	0.589035	0.638336	0.406772	0.458852
b0388	aroL	chr	+	405628	406153	-0.746633	-1.69085	-1.46133	-0.356514	0.0172016	-0.64933	-0.0653242	-1.46409	-0.750345	-1.3988	-0.247066	-0.707495	0.055276	0.0893659	0.410107	0.461913
b0460	hha	chr	-	479313	479532	-1.58916	-2.3358	-1.87729	-1.417	-1.66757	-1.20057	-1.26456	-1.99769	-1.73692	-1.95407	-1.49876	-1.6263	0.133115	0.178348	0.41003	0.461913
b3628	rfaB	chr	-	3801080	3802190	-1.14388	-0.59902	-1.20843	-0.957074	-1.39413	-0.954185	-1.02395	-0.980554	-0.843524	-0.973158	-1.17343	-0.970252	0.653511	0.695552	0.411903	0.463585
b0237	pepD	chr	-	254258	255716	1.09642	1.02869	1.05393	1.45576	1.31873	1.58815	1.39937	1.32219	1.40058	1.05552	1.41673	1.3693	0.0303868	0.0591298	0.414956	0.466668
b0478	ybaL	chr	-	500785	502462	-0.572112	-0.840266	-0.414613	-1.0653	-0.868144	-1.13837	-0.778512	-0.326675	-1.20641	-0.610758	-0.979761	-0.721727	0.0581017	0.0925288	0.427326	0.479739
b4324	uxuR	chr	+	4552598	4553372	-1.1404	-1.32418	-0.55175	-1.23992	-1.25831	-1.38344	-1.31447	-1.26715	-1.01284	-1.01318	-1.26762	-1.2333	0.34075	0.396672	0.427545	0.479739
b2845	yqeG	chr	+	2983868	2985098	-0.506903	-0.140639	-0.701214	-0.239455	-0.491379	0.088762	-0.416405	-0.438995	-0.286137	-0.474086	-0.302103	-0.415995	0.372871	0.428152	0.42876	0.480741
b0134	panB	chr	-	148806	149601	1.22439	1.25303	1.30265	1.30121	1.47431	0.980265	1.32279	1.26079	1.69505	1.26606	1.3227	1.33252	0.960751	0.966594	0.429361	0.481052
b2798	xni	chr	+	2928986	2929832	-1.65108	-1.40574	-1.01371	-1.89799	-1.90749	-1.47941	-1.998	-0.72799	-1.46433	-1.35906	-1.83473	-1.48539	0.162679	0.211184	0.433088	0.484863
b1236	galU	chr	+	1290679	1291588	1.13502	1.31132	1.32573	1.47546	1.50116	1.87733	1.40093	1.18199	1.73323	1.27146	1.5565	1.36047	0.0913293	0.132932	0.435801	0.487534
b0917	ycaR	chr	+	969895	970078	1.77491	1.10274	2.02309	1.07374	1.99905	1.87423	1.52219	1.48506	1.07297	1.57337	1.59393	1.39289	0.971051	0.975638	0.439211	0.490611
b1252	tonB	chr	+	1309112	1309832	-0.497055	-0.479668	-1.22797	-1.51447	-0.77524	0.0611631	-0.933413	-0.177036	0.43102	-0.810984	-0.938857	-0.590531	0.988688	0.990684	0.440571	0.491762
b3204	ptsN	chr	+	3344599	3345091	0.409507	0.0334708	-0.134806	0.582085	0.432324	0.560123	-0.123773	0.714289	0.291295	0.0480521	0.503222	0.24747	0.11013	0.154994	0.441678	0.492628
b2784	relA	chr	-	2909438	2911673	-1.18155	-1.37004	-1.65275	-1.92006	-2.09537	-1.50778	-1.41172	-1.85533	-1.70138	-1.44722	-1.93145	-1.65232	0.122137	0.16654	0.446412	0.497163
b3791	rffA	chr	+	3973168	3974299	-0.27409	0.0977638	-0.133178	-0.318321	-0.0804153	0.672598	-0.485731	0.205721	-0.363644	-0.097844	-0.0457791	-0.22447	0.59128	0.639838	0.455984	0.507065
b2217	rcsB	chr	+	2314198	2314849	0.524298	0.564776	0.593948	0.622365	0.743578	0.827108	0.760499	0.474586	0.695815	0.568189	0.715969	0.642767	0.0911101	0.132743	0.457692	0.508584
b2781	mazG	chr	-	2907915	2908707	-0.726971	-0.362196	-0.300526	-0.351772	0.200857	0.099608	-0.573748	-0.390632	0.19935	-0.44073	-0.0397036	-0.442734	0.111528	0.156517	0.46004	0.510431
b0424	yajL	chr	-	442274	442865	0.152358	0.141586	0.381288	0.753197	0.566969	-0.0127056	0.222847	0.491419	-0.103316	0.226402	0.506964	0.268369	0.463072	0.514563	0.468306	0.519216
b3632	rfaQ	chr	-	3805086	3806121	-0.575712	-1.19535	-1.04005	-0.702368	-0.413444	-0.618742	-0.727522	-1.25816	-0.412085	-0.991501	-0.573449	-0.923299	0.184336	0.234195	0.471475	0.521895
b1613	manA	chr	+	1686599	1687775	1.40005	1.72159	1.34252	1.52266	2.04856	1.6263	1.61931	1.6863	1.45461	1.47407	1.76388	1.60924	0.293134	0.348172	0.471773	0.521895
b2037	rfbX	chr	-	2106360	2107608	-0.572655	-0.810871	-0.537749	-0.020412	-0.379487	0.0454937	-0.668013	-0.647797	0.190863	-0.648642	-0.186762	-0.575808	0.0370224	0.0674884	0.474328	0.523942
b3348	slyX	chr	+	3475661	3475880	-1.2113	-1.52521	-1.28745	-1.36008	-1.73385	-0.590437	-1.45668	-1.80772	-1.32189	-1.37022	-1.419	-1.58448	0.773082	0.801615	0.477754	0.526945
b2611	ypjD	chr	+	2745983	2746775	0.561289	-0.38946	-1.14263	-0.532166	-0.159817	-0.548244	-0.524577	-0.314743	0.187668	-0.600816	-0.35772	-0.351355	0.874506	0.891876	0.479694	0.528693
b2501	ppk	chr	+	2621065	2623132	-0.679211	-0.504077	-0.813292	-0.58784	-1.10231	-0.841975	-0.613487	-0.766883	-0.76246	-0.680084	-0.890291	-0.730606	0.373046	0.428152	0.480717	0.529429
b1342	ydaN	chr	+	1406073	1407057	-0.80191	-0.182002	-0.598838	-0.377754	-1.02283	-0.515474	-0.249075	-0.704212	-0.404349	-0.550737	-0.709924	-0.464108	0.699718	0.734753	0.482127	0.53059
b1325	ycjG	chr	+	1386953	1387919	-0.652333	-0.814526	-0.710754	-2.03145	-1.5896	-0.791349	-1.14418	-1.13787	-1.20641	-0.719105	-1.6476	-1.08348	0.174529	0.224416	0.485554	0.533179
b2601	aroF	chr	-	2738101	2739172	0.0433111	0.205766	0.206376	-0.19971	-0.0891316	0.672598	-0.239851	0.419352	1.76872	0.157475	-0.00638307	0.187889	0.939147	0.948297	0.485392	0.533179
b3031	yqiA	chr	-	3173446	3174028	-2.98453	-2.84703	-2.75239	-2.80954	-2.61293	-3.5636	-2.76193	-2.78059	-2.71045	-2.85943	-2.88939	-2.78626	0.692578	0.728283	0.487986	0.535454
b1491	yddW	chr	-	1565527	1566847	-0.00644198	-0.0120412	-0.221156	-0.420383	-0.269254	-0.275872	-0.420241	-0.192313	-0.0994946	-0.102894	-0.315025	-0.254099	0.0550697	0.089129	0.488515	0.53564
b3515	gadW	chr	-	3661912	3662641	-1.45497	-1.13308	-0.895301	-1.60721	-1.84698	-2.42694	-1.83855	-2.08272	-1.06555	-1.14306	-1.85376	-1.91783	0.0608195	0.0956286	0.490766	0.537712
b1064	grxB	chr	-	1122629	1123277	1.97852	2.10695	1.46941	1.80315	0.877859	1.20681	1.22686	1.65524	1.72154	1.80915	1.22431	1.42419	0.178199	0.227563	0.497157	0.543504
b2988	gsp	chr	-	3134684	3136544	0.580392	-0.0727166	-0.135521	-0.0894273	0.9212	0.200048	-0.487602	0.363921	0.254831	0.0564032	0.358861	-0.0929417	0.593784	0.641614	0.497512	0.543504
b1275	cysB	chr	+	1331878	1332853	0.776121	0.492731	0.792046	-0.245038	0.118622	0.281407	0.633256	0.167842	-0.0671458	0.676748	0.0101958	0.322067	0.0340672	0.0642853	0.498939	0.544264
b1473	yddG	chr	-	1544311	1545193	0.880399	-0.423629	-1.13971	-1.06394	-0.529718	-0.955433	-0.856758	-0.88109	-0.169884	-0.580329	-0.821676	-0.812031	0.405032	0.458626	0.498718	0.544264
b3618	htrL	chr	-	3790848	3791706	-1.32415	-2.05508	-1.7318	-0.934984	-1.0728	-0.677345	-1.40636	-2.05888	-0.404349	-1.77053	-0.956734	-1.51928	0.0418161	0.0733844	0.501066	0.546184
b0287	yagU	chr	+	302214	302829	1.76598	1.62663	0.953306	0.702416	0.404735	0.438133	0.843027	0.128029	1.61671	1.37857	0.51586	0.668132	0.0512541	0.0841427	0.50613	0.550898
b0662	ubiF	chr	+	694323	695499	-0.165935	-0.694521	-0.394805	-0.509484	-0.513084	-0.854754	0.0171646	-0.277202	-0.93155	-0.441647	-0.571384	-0.275699	0.343477	0.398938	0.511796	0.556658
b2810	csdA	chr	+	2941358	2942564	-2.0245	-2.27163	-1.73176	-1.7483	-1.85095	-1.76797	-1.88295	-1.65186	-2.21879	-2.00704	-1.80093	-1.83976	0.292013	0.347846	0.517706	0.562674
b0921	smtA	chr	+	972759	973545	-1.87372	-1.48609	-1.78718	-2.0353	-1.38319	-2.37061	-1.91047	-2.044	-0.791372	-1.71748	-1.81513	-1.8018	0.549003	0.601077	0.521835	0.566748
b2434	ypeA	chr	-	2549734	2550160	-0.970293	-1.09648	-1.13295	-1.019	-1.02345	-0.264666	-0.573471	-1.41044	-1.0527	-1.08291	-0.897367	-0.985604	0.359204	0.414938	0.525321	0.569306
b1063	yceB	chr	-	1121935	1122496	-0.113588	-0.294346	-0.727622	-0.8535	-1.32342	-0.175399	-0.44805	-0.646562	-0.491812	-0.435278	-0.978745	-0.540923	0.361599	0.416748	0.525336	0.569306
b3623	waaU	chr	-	3796261	3797335	-0.732083	-0.64786	-0.417742	-1.29774	-1.30084	-0.278767	-0.934237	-1.20414	0.756115	-0.579948	-1.11932	-0.916432	0.402796	0.456788	0.526771	0.570446
b3146	yraL	chr	-	3290496	3291357	0.361589	-0.523299	-0.279866	0.14387	-0.596686	-0.590437	-0.216597	0.102085	-0.346135	-0.23874	-0.34587	-0.104565	0.607934	0.652171	0.536039	0.58006
b3030	parE	chr	-	3171525	3173418	-0.320034	0.00974345	-0.186476	0.202217	0.271856	-0.238086	-0.152307	-0.00798525	0.0363046	-0.155307	0.145811	-0.0739449	0.273923	0.332143	0.539206	0.583063
b3972	murB	chr	+	4170079	4171108	-0.805308	-0.44562	-0.106824	0.0952328	-0.222681	0.520595	-0.161037	-0.116881	0.17407	-0.433172	0.0124009	-0.117079	0.119324	0.163905	0.540538	0.584079
b1304	pspA	chr	+	1366102	1366771	-0.264471	0.200401	0.00384403	0.346572	0.824393	0.578476	0.427459	0.74328	0.12379	-0.00390534	0.598154	0.485201	0.0352714	0.0653739	0.540996	0.58415
b2901	bglA	chr	+	3041683	3043123	1.46778	1.44475	1.28996	1.32916	1.48379	0.587709	1.35737	1.1509	1.51254	1.38855	1.23377	1.31658	0.436919	0.490258	0.542618	0.585477
b2473	ypfH	chr	-	2591093	2591792	0.407244	0.62193	-0.462976	0.773042	-0.201611	0.35067	-0.0941126	0.0786263	0.304047	0.0497218	0.216888	0.0411932	0.799116	0.826309	0.544232	0.586793
b2177	yejA	chr	+	2270385	2272200	-2.52516	-1.9076	-1.6367	-2.11788	-2.9255	-3.02784	-2.40268	-2.72704	-2.30419	-2.00735	-2.67041	-2.43831	0.162678	0.211184	0.552065	0.594808
b4346	mcrB	chr	-	4575980	4577360	-0.14123	0.00888563	0.123073	0.0155012	-0.148859	0.00380376	0.088258	-0.267149	0.552582	0.00607198	-0.0660977	0.0312314	0.691385	0.727542	0.555896	0.598503
b0543	emrE	chr	+	567537	567870	-2.73342	-2.27439	-2.2117	-1.85318	-2.09644	-2.03551	-2.5299	-3.0842	-1.40882	-2.39159	-2.00277	-2.53732	0.113955	0.158205	0.556598	0.598826
b0907	serC	chr	+	956875	957964	0.690543	-0.0181867	0.366224	0.673438	0.586988	0.433132	0.473191	0.564108	0.504803	0.284431	0.5883	0.511141	0.40191	0.456131	0.557262	0.599107
b2525	fdx	chr	-	2654769	2655105	1.08979	1.65159	2.12562	1.5729	1.94743	1.6581	1.70815	1.19944	1.83811	1.63408	1.75216	1.53517	0.770357	0.800462	0.56499	0.606977
b1096	pabC	chr	+	1152522	1153332	-1.13449	-1.14674	-1.68262	-0.962235	-0.753008	-0.808028	-0.527156	-0.985862	-1.72628	-1.36657	-0.85473	-0.964754	0.104774	0.148864	0.566864	0.608551
b4146	yjeK	chr	-	4372651	4373680	-1.8492	-1.42808	-1.35727	-1.20542	-0.782962	-0.922707	-1.17781	-1.32549	-0.783467	-1.52406	-0.993445	-1.14499	0.0460647	0.0788396	0.574556	0.615921
b3826	yigL	chr	+	4008222	4009023	1.08362	0.404186	0.315672	0.895008	0.827208	0.472299	0.844973	0.576317	0.459056	0.49714	0.773914	0.685519	0.667922	0.706849	0.580001	0.62131
b2961	mutY	chr	+	3101034	3102087	-1.53323	-1.8294	-1.68939	-0.838107	-1.78247	-1.04894	-1.61645	-1.503	-1.1393	-1.72231	-1.35974	-1.51589	0.244292	0.29963	0.583816	0.624948
b0123	cueO	chr	+	137082	138633	0.831635	0.929635	0.57527	0.445075	0.601732	0.505247	0.87194	0.711127	0.301422	0.74269	0.522336	0.684839	0.116731	0.161335	0.585818	0.62664
b0927	ycbL	chr	+	982872	983520	0.0517336	-0.286752	-0.0988805	-0.114863	-0.290036	-0.163903	-0.276786	0.227169	-0.209777	-0.122498	-0.206627	-0.0975106	0.530413	0.582008	0.588529	0.629088
b1798	leuE	chr	-	1878144	1878783	-0.169642	-0.651487	-0.146157	-0.680522	-0.485148	-0.561867	-0.580572	-0.64144	-0.282359	-0.34139	-0.601378	-0.55603	0.259979	0.317042	0.592946	0.633355
b0093	ftsQ	chr	+	103154	103985	-2.93875	-3.2004	-3.07987	-3.25878	-3.36222	-3.13891	-3.34826	-3.26241	-2.84796	-3.08456	-3.29073	-3.2398	0.145663	0.191601	0.595481	0.635607
b0355	frmB	chr	-	376758	377592	1.4416	1.15557	0.653549	1.75896	0.937049	1.69644	1.46546	0.833753	1.50568	0.982664	1.32907	1.23574	0.339637	0.395712	0.598827	0.63872
b1860	ruvB	chr	-	1942369	1943380	-0.332979	-0.557118	-0.499628	-0.276773	-0.0873901	-0.257013	-0.276036	-0.0960454	-0.449992	-0.484375	-0.188541	-0.254099	0.0474877	0.0804605	0.60896	0.648599
b0834	yliF	chr	+	874557	875886	-0.895396	-1.10218	-0.784904	-1.10241	-1.20575	-0.412291	-1.38238	-1.60537	-0.456188	-0.927558	-1.03434	-1.40576	0.943704	0.951049	0.608792	0.648599
b3572	avtA	chr	+	3737727	3738981	0.0808117	0.206449	-0.234082	0.101459	0.191934	0.13028	0.219444	-0.0991331	0.131286	-0.0310828	0.151911	0.0879825	0.446719	0.498999	0.612622	0.652033
b4053	alr	chr	+	4263804	4264884	-1.95681	-1.65841	-1.71555	-2.2317	-1.9137	-2.16746	-2.01788	-1.87122	-2.20324	-1.76864	-2.05834	-2.04434	0.0703204	0.107011	0.618982	0.658332
b1248	yciU	chr	-	1304844	1305174	-2.30655	-1.96322	-2.39066	-1.87414	-1.79047	-1.6128	-1.71302	-1.93087	-1.79137	-2.25114	-1.78641	-1.88295	0.0506496	0.0835185	0.627471	0.666884
b2571	rseB	chr	-	2705819	2706776	-1.46779	-1.74429	-1.31093	-1.32875	-1.64669	-1.83455	-1.69433	-1.56519	-1.2338	-1.52947	-1.56659	-1.5155	0.649212	0.691966	0.62819	0.667172
b2418	pdxK	chr	-	2534407	2535259	0.958624	1.08649	0.900893	1.06872	1.2675	0.612765	0.835871	1.29182	0.26075	0.966817	1.03175	0.864421	0.996459	0.996459	0.631476	0.670184
b2033	wbbJ	chr	-	2102517	2103108	0.975321	0.715684	0.974556	0.726491	0.640011	1.45602	0.71122	0.516197	1.1081	0.881097	0.799057	0.67981	0.862735	0.882895	0.633909	0.672287
b4492	ydbA	chr	+	1463415	1472037	-2.22317	-2.35577	-2.6814	-2.51418	-2.88299	-2.45378	-2.82935	-2.4291	-2.27298	-2.44967	-2.67322	-2.62314	0.361187	0.416748	0.644641	0.683182
b3150	yraP	chr	+	3294430	3295006	0.169019	0.180515	0.716807	-0.449176	0.353443	-0.30948	0.319821	0.136757	-0.380304	0.355135	-0.104689	0.121164	0.191303	0.241604	0.647385	0.685602
b2714	ascG	chr	-	2836275	2837289	-0.533229	-1.07626	-0.766011	-1.2468	-1.37589	-0.738598	-1.18409	-0.757593	-1.07227	-0.837727	-1.2153	-1.01637	0.262111	0.31912	0.648764	0.686574
b3011	yqhD	chr	+	3153376	3154540	1.87325	1.85854	1.86521	1.89054	1.67791	1.6098	2.28602	2.22814	1.2185	1.86774	1.73852	2.04677	0.240332	0.296482	0.651182	0.688643
b3858	yihD	chr	+	4040091	4040361	0.904176	1.00954	1.04038	0.202623	0.363813	0.975161	0.805943	0.713943	0.415079	0.995127	0.404236	0.68109	0.180089	0.229583	0.653186	0.690273
b0177	yaeT	chr	+	197927	200360	-0.0810779	-0.0390427	-0.0167821	0.0788144	0.0120742	0.116424	0.0860189	-0.194828	0.149557	-0.0422915	0.0565036	-0.00547609	0.0426098	0.0742928	0.657818	0.694674
b2329	aroC	chr	-	2444409	2445495	-1.02997	-1.12153	-1.08189	-0.902572	-0.999859	-0.98908	-1.07079	-0.692555	-1.47928	-1.07195	-0.956722	-1.01502	0.049799	0.0826652	0.658852	0.695273
b4389	radA	chr	+	4623934	4625317	-1.07007	-1.05388	-0.663545	-1.10241	-1.12934	-1.321	-0.983919	-0.546183	-1.56672	-0.928849	-1.13962	-0.94786	0.186807	0.23693	0.661896	0.697497
b2480	bcp	chr	+	2598499	2598970	1.03778	0.712479	0.342301	0.541443	0.683372	0.706048	0.499615	0.797744	0.795536	0.641113	0.630179	0.639506	0.816741	0.841028	0.661469	0.697497
b3182	dacB	chr	+	3326984	3328418	0.0578259	-0.449036	-0.206079	-0.681962	-0.140032	-0.67205	-0.8899	0.569353	-0.503885	-0.234168	-0.454536	-0.409601	0.26826	0.325837	0.672308	0.707799
b2569	lepA	chr	-	2703346	2705146	0.0927937	0.0823097	-0.0230143	-0.304047	-0.649838	1.24468	-0.163246	-0.148692	-0.254072	0.0486604	-0.0517342	-0.172074	0.944023	0.951049	0.672623	0.707799
b0387	yaiI	chr	+	404987	405446	-1.55234	-1.41264	-1.03994	-1.05562	-1.29519	-2.06437	-1.53899	-0.94522	-1.4387	-1.32879	-1.3707	-1.35598	0.715327	0.748505	0.673123	0.707825
b2034	wbbI	chr	-	2103088	2104081	1.08876	0.988038	1.12391	1.43082	1.11808	1.55214	0.792973	0.784884	1.94922	1.06621	1.30372	0.918003	0.136108	0.181113	0.677596	0.712026
b2330	prmB	chr	-	2445529	2446462	0.988949	0.818699	0.51207	0.971548	0.865752	0.669352	0.595377	0.454459	1.14209	0.724785	0.8538	0.625294	0.728526	0.760712	0.67955	0.713576
b1711	btuC	chr	-	1792195	1793176	-2.10112	-2.15327	-2.30482	-1.58784	-2.22194	-2.10184	-1.90109	-1.70959	-2.82555	-2.2002	-1.97422	-2.03457	0.384721	0.438965	0.687022	0.720913
b0376	ampH	chr	-	394353	395511	-1.49801	-1.3566	-0.957757	-1.97506	-1.7184	-1.79617	-1.46704	-1.19676	-2.34391	-1.2555	-1.83678	-1.54723	0.0560749	0.090261	0.691375	0.723952
b1840	yebZ	chr	-	1921742	1922615	-1.99603	-1.92232	-1.86687	-1.97552	-2.25122	-1.41553	-1.955	-2.18946	-1.85071	-1.90756	-2.00459	-2.00073	0.865035	0.884034	0.691377	0.723952
b3833	ubiE	chr	+	4016877	4017633	0.122215	0.0572196	0.0918508	-0.247148	-0.168741	0.109489	-0.0338775	-0.0167737	-0.105754	0.0956791	-0.146069	-0.02752	0.214456	0.268341	0.693558	0.725725
b0006	yaaA	chr	-	5682	6459	1.34669	1.01326	1.2083	1.11651	0.998214	2.29084	1.08807	1.72012	0.990391	1.17931	1.24125	1.25701	0.571898	0.623851	0.695863	0.727626
b1059	solA	chr	-	1118690	1119809	0.70637	0.478887	0.853206	0.97685	0.635377	1.06164	1.03517	0.922676	0.43102	0.67951	0.829601	0.898792	0.282266	0.339091	0.699005	0.730398
b0242	proB	chr	+	259611	260715	-0.328196	-0.211296	-0.361449	-0.428963	-0.555684	-0.542415	-0.258283	-0.325557	-0.741578	-0.311041	-0.513247	-0.369701	0.0270387	0.0542597	0.704599	0.735212
b3148	yraN	chr	+	3293415	3293811	-1.89356	-2.3457	-2.02505	-2.44028	-2.30614	-2.8838	-2.64817	-1.65892	-2.82623	-2.07287	-2.43411	-2.36896	0.112108	0.157036	0.709656	0.739971
b1983	yeeN	chr	+	2054881	2055598	0.268401	0.452104	0.520663	0.49311	0.128779	0.344544	0.304195	0.00955029	1.04638	0.427138	0.286058	0.273635	0.523406	0.574743	0.719664	0.749455
b0053	surA	chr	-	53415	54702	-0.584274	-0.530707	-0.498857	-0.532122	-0.490233	-0.552005	-0.402454	-0.564723	-0.722766	-0.52796	-0.517008	-0.519972	0.69369	0.728937	0.719759	0.749455
b1187	fadR	chr	+	1234160	1234880	-0.620399	-0.984104	-0.653912	-0.454441	-0.155606	-0.663638	-0.528355	-0.26911	-0.694546	-0.774759	-0.367956	-0.458286	0.159033	0.207356	0.725136	0.754526
b0281	intF	chr	-	294919	296320	0.985096	1.87735	0.716042	-0.0699915	0.485999	0.314144	0.0885961	0.000331762	1.0689	1.11732	0.237715	0.134411	0.0965871	0.139318	0.733386	0.762578
b1928	yedD	chr	-	2005700	2006114	-0.57145	-0.812243	-0.687271	-0.1708	-0.453347	-0.818611	-0.218455	-0.485789	-1.08539	-0.713948	-0.407513	-0.468974	0.384348	0.438876	0.735826	0.764581
b0167	glnD	chr	-	185977	188650	0.158864	-0.377308	-0.460003	-0.626314	-0.61204	-0.310528	0.0595671	-0.235562	-1.00455	-0.309342	-0.562104	-0.272325	0.276978	0.33513	0.742539	0.771018
b2748	ftsB	chr	-	2870530	2870842	-3.40068	-3.33081	-3.72518	-2.90977	-2.97422	-3.114	-3.45449	-3.22394	-2.60429	-3.4955	-2.97241	-3.23342	0.038638	0.0695672	0.747739	0.775877
b4393	trpR	chr	+	4630782	4631109	-1.35886	-1.86907	-2.35361	-1.51243	-1.417	-1.51809	-1.18251	-1.54312	-1.96825	-2.00339	-1.44937	-1.49718	0.318256	0.37343	0.753424	0.781231
b1479	maeA	chr	-	1551995	1553693	0.697679	0.660506	0.62897	0.888525	1.04214	1.16558	1.03731	1.02036	0.94983	0.656959	1.00743	1.02517	0.037352	0.0678902	0.754225	0.781518
b2352	yfdI	chr	+	2467152	2468484	-1.92944	-1.99294	-1.84144	-1.36008	-1.64237	-1.16612	-1.83117	-1.90419	-0.821961	-1.92098	-1.46203	-1.78442	0.0505418	0.0834332	0.755959	0.78277
b3058	folB	chr	-	3202242	3202611	-0.837017	-0.860268	-0.589763	-0.697929	-0.327348	-1.2494	-0.763396	-0.99413	-0.79879	-0.772334	-0.661259	-0.871304	0.989436	0.990766	0.763581	0.790113
b0683	fur	chr	-	709422	709869	-1.59155	-1.69023	-1.64359	-1.76054	-1.91095	-1.65102	-1.81176	-1.71891	-1.71101	-1.64607	-1.81761	-1.77154	0.214148	0.26818	0.766158	0.792229
b0658	ybeX	chr	-	690128	691007	-1.38083	-1.6836	-1.8524	-1.11522	-0.678475	-1.13227	-0.994901	-0.953258	-1.13017	-1.67826	-0.928736	-0.997774	0.0309156	0.0597061	0.772481	0.798125
b3193	yrbD	chr	-	3335931	3336483	1.19406	1.1167	1.00497	0.799076	0.985905	0.744662	0.749998	0.667223	1.32345	1.0942	0.878118	0.757953	0.0497982	0.0826652	0.772932	0.798125
b2011	sbcB	chr	+	2080779	2082207	0.716596	-0.611128	0.125236	0.247773	0.86136	1.13405	1.0225	0.680965	0.218681	-0.0583531	0.673736	0.720136	0.231544	0.287068	0.77563	0.799802
b4159	yjeP	chr	-	4384069	4387393	-2.64269	-2.64341	-2.70781	-3.03194	-2.71703	-2.7543	-2.63305	-2.58767	-3.10592	-2.66607	-2.84078	-2.7088	0.226059	0.281205	0.778936	0.802655
b3346	yheO	chr	-	3473739	3474462	0.623888	0.697108	0.139455	-0.71116	0.167744	-0.0905993	-0.216597	-0.10296	-0.0655473	0.44254	-0.213817	-0.217245	0.100002	0.143039	0.782117	0.80504
b2954	rdgB	chr	+	3094702	3095296	0.42077	0.281685	0.237796	0.443439	1.01461	-0.0440478	0.167173	0.648106	0.290796	0.301206	0.549251	0.330469	0.659206	0.700612	0.782333	0.80504
b2495	yfgD	chr	+	2615599	2615959	0.372722	0.335412	0.291058	0.293955	0.541364	0.520595	0.481734	0.783398	-0.178929	0.330987	0.443809	0.468231	0.269081	0.326538	0.785876	0.808128
b0969	yccK	chr	-	1029561	1029891	-0.369328	-0.212403	-0.38688	0.465871	-0.0835351	0.466147	0.203784	0.520754	-0.0808789	-0.321712	0.192052	0.270719	0.0699543	0.106614	0.800257	0.822349
b4173	hflX	chr	+	4398694	4399975	-2.44931	-2.26972	-2.0673	-1.98976	-2.06666	-2.13783	-2.01831	-2.13176	-2.08647	-2.25602	-2.04941	-2.07967	0.208234	0.261213	0.807693	0.828305
b0121	speE	chr	-	135597	136464	1.21219	1.53012	1.05913	1.25323	1.3243	1.0466	1.01381	1.40681	1.31763	1.24514	1.23575	1.19504	0.737226	0.768719	0.807723	0.828305
b0571	cusR	chr	-	593982	594666	-1.18577	-0.942974	-1.42164	-0.986389	-0.905537	-1.96483	-1.50657	-1.22901	-0.807314	-1.22728	-1.18634	-1.1991	0.80134	0.828033	0.807677	0.828305
b2948	yqgE	chr	+	3090958	3091522	0.287406	-0.126488	0.752931	0.893459	0.545333	0.208651	0.215085	0.350235	0.870758	0.30578	0.588709	0.362263	0.492129	0.544413	0.814462	0.834641
b2729	hypD	chr	+	2850157	2851279	-0.630638	-0.905894	0.246585	-1.92995	-1.80259	-1.56687	-1.01703	-1.94522	-2.07677	-0.469029	-1.82357	-1.59031	0.0511324	0.0841284	0.823796	0.843626
b3002	yqhA	chr	-	3146998	3147493	-0.113024	-0.258187	-0.309655	-0.0497983	-0.243962	-0.100631	-0.234188	-0.505111	0.192686	-0.247671	-0.144271	-0.28167	0.312699	0.36778	0.829742	0.849131
b2493	yfgO	chr	-	2612841	2613903	-0.768357	-1.12833	-0.810289	-0.441619	-0.794417	-1.37924	-1.28479	-0.606419	-0.947492	-0.911063	-0.774248	-0.983779	0.925029	0.936986	0.836657	0.85562
b3863	polA	chr	+	4044988	4047775	1.311	1.15941	1.13733	1.25642	1.29747	1.44844	1.24576	1.18078	1.50198	1.18796	1.30779	1.26336	0.175478	0.225053	0.842059	0.860553
b3998	nfi	chr	+	4196812	4197484	-0.90752	-0.512151	-1.68418	-0.837012	-0.573109	-0.396943	-0.461484	0.242407	-2.02233	-1.15353	-0.655826	-0.656575	0.337573	0.393615	0.850208	0.868285
b0192	nlpE	chr	+	215268	215979	-0.357849	-0.586355	0.133127	-0.673391	-0.867944	-0.086394	-0.683758	-0.541221	-0.238471	-0.276225	-0.676361	-0.559307	0.438824	0.492025	0.851237	0.86874
b2290	yfbQ	chr	+	2405582	2406800	0.108987	0.68741	0.219458	0.936936	0.847038	0.00172145	0.776362	0.212321	0.595651	0.334498	0.65956	0.510739	0.508879	0.560444	0.856094	0.873098
b0413	nrdR	chr	+	432225	432675	-0.359017	0.240918	0.329774	-0.296556	0.456796	-0.406474	-0.0369121	0.110372	-0.15301	0.0929946	-0.023366	0.0258297	0.683799	0.721088	0.859692	0.876168
b3527	yhjJ	chr	-	3678466	3679963	-0.0377914	-0.598278	-0.484642	-0.404344	-0.57056	-0.903903	-0.851492	-0.448206	-0.47389	-0.439051	-0.585758	-0.673226	0.326452	0.38137	0.867052	0.883065
b1847	yebF	chr	-	1928057	1928414	-1.0383	-0.628397	-0.328831	-0.411517	0.0518687	-0.538299	0.00944359	-0.745912	-0.299167	-0.644837	-0.25792	-0.38892	0.252277	0.308154	0.879442	0.895071
b3538	bcsG	chr	+	3696236	3697916	-0.828831	-0.597004	-0.977549	-1.24351	-1.25079	-0.852864	-0.867532	-1.03833	-1.34885	-0.830627	-1.16905	-1.02569	0.143215	0.189238	0.880722	0.895761
b3835	ubiB	chr	+	4018248	4019889	-2.14289	-1.67336	-1.92132	-2.28462	-2.51016	-2.25419	-2.14474	-2.11837	-2.68904	-1.90272	-2.38226	-2.25477	0.0633653	0.0987967	0.884575	0.899066
b4295	yjhU	chr	-	4517360	4518347	-0.509342	-0.61541	-1.04685	-1.04688	-1.2894	-1.51809	-1.36308	-1.26601	-1.16117	-0.774759	-1.2465	-1.23765	0.0603319	0.0949622	0.895263	0.909309
b2600	tyrA	chr	-	2736969	2738091	0.424288	0.645089	0.716125	0.114616	0.36003	-0.185049	0.0795355	0.681562	-0.33082	0.59721	0.171507	0.198967	0.0666103	0.102356	0.896943	0.910394
b0089	ftsW	chr	+	98402	99647	-2.40492	-2.94621	-2.84617	-2.29585	-2.39611	-2.04987	-2.29965	-2.67445	-1.8729	-2.76936	-2.30606	-2.39285	0.0806704	0.121331	0.89943	0.912296
b3056	cca	chr	+	3199912	3201151	-1.76325	-2.04945	-1.98759	-1.84061	-2.37884	-1.70591	-2.10005	-1.95603	-1.77909	-1.95682	-2.07949	-1.96952	0.865002	0.884034	0.903014	0.915308
b3601	mtlR	chr	+	3773594	3774182	-1.58886	-2.42547	-1.92229	-1.53579	-1.85813	-1.55417	-1.35313	-1.65345	-2.02051	-2.00877	-1.68717	-1.64092	0.309799	0.364656	0.911895	0.923682
b3789	rffH	chr	+	3971630	3972512	-0.929915	-0.922616	-0.767161	-1.02119	-0.497736	-0.841975	-0.681544	-0.652439	-1.09713	-0.861098	-0.758527	-0.725181	0.639457	0.682546	0.916766	0.927984
b2822	recC	chr	-	2957081	2960450	-1.57526	-1.364	-1.47583	-2.57097	-2.15051	-1.94889	-1.87652	-2.09722	-2.60833	-1.45234	-2.25484	-2.0989	0.0432757	0.0752774	0.922525	0.932546
b3059	ygiH	chr	+	3202715	3203333	-1.29074	-1.41404	-1.67423	-1.45973	-1.41653	-1.40832	-1.2324	-1.29314	-1.82088	-1.47467	-1.41921	-1.3489	0.80777	0.834098	0.9224	0.932546
b1118	lolE	chr	+	1176542	1177787	-1.70672	-1.43534	-1.58102	-2.07927	-1.75594	-1.93524	-1.88952	-2.07467	-1.76722	-1.56847	-1.90041	-1.97017	0.0475522	0.0804605	0.924718	0.934128
b3205	yhbJ	chr	+	3345136	3345991	-0.157031	-0.0160767	-0.486067	0.0255694	-0.0577278	-0.0190437	-0.253591	-0.0643677	0.227006	-0.255744	-0.0210691	-0.124918	0.281356	0.338804	0.933661	0.942523
b3100	yqjK	chr	+	3248098	3248398	-1.84108	-0.983245	-2.43178	-2.76457	-2.67706	-2.27736	-2.09891	-2.30779	-3.2117	-1.80855	-2.64298	-2.41502	0.181301	0.23093	0.934524	0.942755
b1614	ydgA	chr	+	1687875	1689384	1.04387	1.21053	1.0227	1.00938	1.19181	1.38567	1.39228	1.1452	1.0115	1.09336	1.14999	1.23642	0.463766	0.51495	0.939283	0.946914
b2293	yfbT	chr	-	2409460	2410111	-1.08931	-1.38252	-1.4731	-1.58445	-1.71623	-1.90087	-1.31754	-1.46479	-2.34613	-1.32781	-1.6973	-1.57756	0.0500029	0.0829113	0.947655	0.95467
b3553	ghrB	chr	+	3715332	3716307	1.43047	1.39032	1.8486	0.985417	1.67954	2.07275	1.66146	1.68899	1.31442	1.56675	1.44583	1.6125	0.952471	0.958911	0.948259	0.95467
b3194	yrbE	chr	-	3336487	3337270	-0.327972	-0.649026	-0.441402	-0.470483	-0.45777	-0.743876	-0.688148	-0.773535	-0.167001	-0.499955	-0.517497	-0.641338	0.557868	0.609439	0.949784	0.95556
b3099	yqjE	chr	+	3247704	3248109	-2.77609	-2.62744	-2.69942	-2.8874	-2.55538	-2.76299	-2.69532	-2.55036	-2.93927	-2.69687	-2.72604	-2.67243	0.769235	0.799854	0.965185	0.970398
b0199	metN	chr	-	221613	222645	-0.733578	-0.423907	-0.82293	0.0466428	-0.438141	-0.390596	-0.385218	-0.498964	0.0711242	-0.678025	-0.266554	-0.363006	0.115214	0.159587	0.966777	0.970688
b0378	yaiW	chr	+	397095	398190	-1.0634	-0.708206	-0.549762	-1.12841	-0.251134	-0.10501	-0.747238	-0.987449	0.18626	-0.754554	-0.604829	-0.72867	0.490612	0.543139	0.966762	0.970688
b3202	rpoN	chr	+	3342738	3344172	-1.54834	-1.45983	-1.49499	-1.82857	-1.84324	-1.32498	-1.37317	-1.83799	-1.76472	-1.496	-1.75228	-1.60095	0.436563	0.490228	0.976619	0.979909
b1274	topA	chr	+	1329071	1331669	-0.689279	-0.728037	-0.730119	-1.18485	-0.954255	-0.806468	-1.01893	-0.949042	-0.96825	-0.723973	-1.0152	-0.979978	0.13499	0.179946	0.980185	0.982181
b2475	ypfJ	chr	-	2593895	2594759	-0.400335	-0.238059	-0.734423	-1.23062	-1.15464	-0.297858	-0.663097	-0.933443	-1.06118	-0.478008	-1.03596	-0.873068	0.283551	0.340216	0.980862	0.982181
b1538	dcp	chr	-	1623358	1625404	1.44957	1.66971	1.57383	1.73734	1.26763	1.50448	1.51223	1.57088	1.43798	1.57668	1.47487	1.51436	0.711636	0.745166	0.980219	0.982181
b0761	modE	chr	-	793078	793867	0.782005	0.165921	1.60128	0.932691	1.04332	0.304866	1.40707	0.494649	0.406308	0.7529	0.843853	0.840929	0.862259	0.882895	0.982879	0.98354
b3053	glnE	chr	-	3194822	3197663	-1.13459	-0.894856	-1.13848	-2.12716	-1.04801	-1.51762	-1.59545	-1.41403	-1.6789	-1.06081	-1.5768	-1.52696	0.241373	0.29752	0.996728	0.996728
Below are not complemented (and so no t-tests were performed)
b0008	talB	chr	+	8237,	9191,	1.43365	1.19722	1.20283	1.53419	1.37204	1.54032	1.61057	1.47509	1.59072	1.25853	1.458	1.5592
b0009	mog	chr	+	9305,	9893,	0.590691	0.64108	0.452781	0.171472	0.135893	-0.118816	0.144959	-0.497761	0.10097	0.554542	0.0889442	-0.102888
b0019	nhaA	chr	+	17488,	18655,	-0.843545	-0.63222	-0.93519	-1.19147	-1.20653	-1.20534	-1.0376	-1.36735	-1.21497	-0.817353	-1.20074	-1.19799
b0029	ispH	chr	+	26276,	27227,	-0.617293	-0.530659	-0.0903973	0.0534301	0.263827	0.708222	0.35844	0.569112	0.336282	-0.397028	0.252356	0.417146
b0050	apaG	chr	-	51228,	51606,	-2.06446	-2.48152	-2.2197	-3.19095	-3.06752	-2.56687	-3.31709	-2.69906	-3.55594	-2.25479	-3.04071	-3.18883
b0055	djlA	chr	+	57363,	58179,	-0.531727	-0.519257	-0.345636	-0.931142	-1.14291	-0.667478	-1.5212	-1.60894	-0.951244	-0.465075	-0.984114	-1.47453
b0068	tbpA	chr	-	74496,	75480,	-0.785036	-0.480836	-0.63199	-0.165607	0.268014	0.289269	-0.356879	0.0904035	2.42705	-0.630702	0.102723	-0.0373884
b0082	mraW	chr	+	90093,	91035,	-2.39354	-2.42799	-2.33844	-2.14051	-2.0007	-2.31931	-1.95264	-2.06969	-2.13492	-2.38251	-2.10879	-2.03229
b0083	ftsL	chr	+	91031,	91397,	-4.22561	-3.96394	-4.18575	-4.12673	-4.62862	-4.45306	-4.17107	-4.79192	-4.4231	-4.12935	-4.4395	-4.43884
b0084	ftsI	chr	+	91412,	93179,	-5.33437	-5.34649	-5.28677	-5.74342	-5.76928	-5.85411	-5.9144	-5.83554	-5.78529	-5.31974	-5.77302	-5.86377
b0086	murF	chr	+	94649,	96008,	-1.2532	-1.20314	-1.41436	-0.75385	-0.714786	-0.805155	-0.516625	-0.758468	-0.341252	-1.28961	-0.744703	-0.585342
b0088	murD	chr	+	97086,	98403,	-1.32557	-1.30433	-1.29193	-0.989313	-1.0733	-0.857135	-0.819412	-0.665761	-1.04625	-1.30659	-1.00289	-0.791928
b0090	murG	chr	+	99643,	100711,	-1.31169	-1.75217	-1.50024	-2.06292	-1.97293	-1.67681	-2.33177	-2.38132	-1.98931	-1.55865	-1.95267	-2.34537
b0092	ddlB	chr	+	102232,	103153,	-1.71372	-1.6064	-1.85776	-1.39104	-1.62757	-1.31613	-1.3777	-1.18093	-1.27379	-1.75467	-1.48924	-1.27009
b0096	lpxC	chr	+	106556,	107474,	-1.66887	-1.68168	-1.58453	-1.62992	-1.65788	-1.66991	-1.75339	-1.74027	-1.75099	-1.64091	-1.65038	-1.75492
b0097	secM	chr	+	107704,	108217,	-2.28285	-1.84695	-2.13016	-1.8988	-1.61132	-1.66204	-1.36316	-1.75759	-1.7389	-2.08846	-1.71503	-1.5333
b0098	secA	chr	+	108278,	110984,	-0.746921	-0.881162	-0.905294	-0.865313	-0.79765	-0.745129	-0.621129	-0.63332	-0.299242	-0.85752	-0.811517	-0.573679
b0104	guaC	chr	+	113443,	114487,	2.04288	2.14157	1.66075	1.48925	1.74754	1.3242	0.449653	0.568938	0.0184196	1.91391	1.5628	0.412075
b0122	yacC	chr	-	136569,	136917,	-1.28109	-1.60327	-1.23397	-1.87735	-1.06499	-1.80133	-2.4691	-2.89942	-1.66399	-1.39421	-1.50479	-2.31332
b0128	yadH	chr	+	143701,	144472,	0.435301	0.403102	0.44825	0.0488122	0.81671	-0.0744214	0.207543	-0.436671	-0.0425046	0.419363	0.353235	-0.102946
b0144	yadB	chr	-	159185,	160082,	-1.60362	-0.985625	-0.588409	-1.05179	-1.0366	-1.6841	-1.93234	-0.464094	-2.88515	-1.04656	-1.1735	-1.75777
b0149	mrcB	chr	+	164729,	167264,	-2.5154	-1.99257	-2.21818	-2.31704	-2.33992	-2.77418	-3.18676	-3.03739	-3.49653	-2.23815	-2.40971	-3.19294
b0150	fhuA	chr	+	167483,	169727,	-1.73115	-2.28084	-2.10041	-2.7373	-2.58109	-2.75826	-3.18695	-3.87483	-3.41089	-2.09861	-2.67072	-3.48044
b0155	clcA	chr	+	175106,	176528,	-1.33088	-1.6642	-1.82725	-2.01195	-2.09334	-1.50158	-2.25616	-2.04252	-2.13533	-1.64268	-1.97021	-2.11663
b0156	yadR	chr	+	176609,	176954,	-0.0370205	0.159021	-0.254206	0.48359	0.306051	0.34102	0.531924	0.204978	0.706458	-0.0591272	0.376724	0.447761
b0159	mtn	chr	-	178454,	179153,	0.69897	0.817912	0.830915	0.744113	0.696336	0.554542	0.11444	0.0329074	0.102315	0.790895	0.686807	0.0826024
b0161	degP	chr	+	180883,	182308,	0.675968	0.933703	0.749578	1.28859	1.30412	1.08007	2.12195	1.95002	1.80775	0.785261	1.25715	2.00245
b0172	frr	chr	+	192871,	193429,	-0.341906	-0.289983	-0.291495	0.37985	0.159724	0.0337021	0.0810637	0.255506	0.275354	-0.302162	0.214744	0.190243
b0174	ispU	chr	+	194902,	195664,	-1.34497	-1.34155	-1.43608	-1.75449	-1.48335	-1.66239	-2.06976	-2.23895	-2.10354	-1.3901	-1.61995	-2.16102
b0176	rseP	chr	+	196545,	197898,	-2.06545	-2.24123	-2.37975	-2.74979	-2.73036	-2.52114	-2.97067	-2.98242	-2.97459	-2.26017	-2.69844	-3.01089
b0178	skp	chr	+	200481,	200967,	1.03174	0.886788	0.835501	0.664547	0.405137	0.605342	0.348302	0.512858	0.538325	0.907126	0.529247	0.424657
b0188	tilS	chr	+	212330,	213629,	-1.94426	-1.73099	-1.9045	-2.02882	-2.13701	-1.92419	-2.02497	-2.20825	-2.07969	-1.84175	-2.06725	-2.04559
b0198	metI	chr	-	220967,	221621,	-0.63668	0.258159	-0.221538	-0.137178	-0.325216	-0.189899	-1.26824	-1.56671	-1.52834	-0.210341	-0.230062	-1.36409
b0200	gmhB	chr	+	222832,	223408,	-0.477661	-0.347657	-0.259737	-0.13925	-0.377651	-0.504559	0.0578905	-0.276842	-0.467738	-0.347827	-0.317243	-0.159306
b0223	yafJ	chr	+	244326,	245094,	-0.577664	-0.797251	-1.50184	-0.380148	-0.835124	-0.451391	0.996636	0.578342	0.909067	-1.04697	-0.6104	0.831631
b0344	lacZ	chr	-	362454,	365529,	-0.847642	-0.93352	-1.00875	-2.96483	-2.96997	-2.76084	-2.88696	-3.32733	-3.47504	-0.9223	-2.93282	-3.15132
b0377	sbmA	chr	+	395862,	397083,	-0.961323	-0.89629	-0.726458	-0.937782	-0.355131	-1.3274	-1.28676	-0.360258	-1.88515	-0.838425	-0.788581	-1.1991
b0381	ddlA	chr	-	399052,	400147,	0.990275	0.848756	0.758398	0.702867	0.820505	0.680073	0.389273	0.46849	0.269881	0.845958	0.745479	0.393631
b0383	phoA	chr	+	400970,	402386,	-1.18745	-0.928055	-1.15404	-1.54364	-1.44573	-1.61538	-1.63502	-1.80772	-1.9828	-1.07022	-1.51526	-1.74897
b0397	sbcC	chr	-	411830,	414977,	-0.270133	-0.843012	-0.539911	-0.356918	-0.828369	-0.796172	-1.28921	-1.44272	-1.96043	-0.578878	-0.652727	-1.48719
b0401	brnQ	chr	+	418814,	420134,	-1.85509	-1.86727	-1.91864	-2.49749	-2.22341	-2.34524	-2.65413	-2.43416	-2.79792	-1.87735	-2.33702	-2.58291
b0407	yajC	chr	+	426510,	426843,	0.0312908	0.237965	0.0561602	-0.186856	-0.183621	-0.165386	-0.227777	-0.259352	-0.170321	0.113672	-0.181881	-0.226195
b0409	secF	chr	+	428728,	429700,	-1.21798	-1.27292	-1.21136	-1.74855	-1.65865	-1.57613	-1.65293	-1.70807	-1.78784	-1.23653	-1.67966	-1.72094
b0411	tsx	chr	-	430352,	431237,	1.04098	0.826503	0.812181	0.8701	0.900625	0.926689	1.76767	1.84625	1.75206	0.8703	0.896822	1.79441
b0422	xseB	chr	-	440324,	440567,	-1.68252	-1.76242	-1.84019	-2.67782	-2.16353	-2.1639	-2.0721	-2.56907	-2.47075	-1.75674	-2.32539	-2.36709
b0425	panE	chr	-	442827,	443739,	0.530959	-0.11271	-0.0980356	-0.171	0.208298	-0.314911	0.00537105	-0.411788	-0.0655473	0.0542053	-0.052669	-0.137799
b0426	yajQ	chr	+	443906,	444398,	0.942851	0.997346	1.05677	0.498213	0.491716	0.674482	0.263312	0.16009	0.357258	1.00989	0.526111	0.226847
b0428	cyoE	chr	-	446038,	446929,	-3.96049	-4.09188	-3.96789	-3.64347	-3.66203	-3.91601	-1.46478	-1.52749	-1.48266	-4.00743	-3.69699	-1.49142
b0429	cyoD	chr	-	446940,	447270,	-1.94949	-1.79095	-1.7998	-1.21551	-1.1422	-1.43679	1.30886	1.357	1.55875	-1.84724	-1.22751	1.36043
b0430	cyoC	chr	-	447269,	447884,	-1.37286	-1.39227	-1.40865	-0.91033	-0.928194	-0.934169	1.68753	1.63355	1.66363	-1.40568	-0.920992	1.6703
b0441	ppiD	chr	+	461138,	463010,	0.160897	-0.0199974	-0.00113322	-0.438337	-0.200274	-0.362214	-0.592527	-0.401763	-0.726502	0.03115	-0.32011	-0.54783
b0462	acrB	chr	-	480477,	483627,	-0.405953	-0.464154	-0.365803	-0.605614	-0.630876	-0.606952	-0.776015	-0.786143	-0.883852	-0.413528	-0.617566	-0.814775
b0463	acrA	chr	-	483649,	484843,	0.950783	0.947523	1.23162	0.983582	0.826241	1.00015	0.168466	0.0537717	0.354975	1.05165	0.915208	0.138407
b0464	acrR	chr	+	484984,	485632,	-1.59987	-1.81524	-1.22197	-1.30261	-1.57014	-1.27493	-0.597545	-1.59564	-0.999959	-1.57048	-1.42816	-1.10352
b0481	ybaK	chr	-	505826,	506306,	0.736759	0.896734	0.975649	0.948213	0.510567	0.081853	0.223784	-0.525682	-0.438701	0.895997	0.530687	-0.197121
b0568	nfrA	chr	-	587204,	590177,	-1.20825	-1.1761	-0.676351	-1.02596	-0.951024	-1.22612	-1.62988	-2.19603	-1.19225	-1.01734	-1.00686	-1.73877
b0577	ybdG	chr	-	602638,	603886,	0.0178808	-0.314344	-0.157774	-0.729538	-0.274513	-0.626962	-0.813549	-0.73877	-0.961297	-0.175938	-0.515736	-0.802304
b0582	insL	chr	+	607287,	608400,	-1.56333	-1.23847	-1.56217	-1.72534	-1.86148	-0.919978	-1.4049	-2.12808	-2.37633	-1.47076	-1.66105	-1.89142
b0605	ahpC	chr	+	638167,	638731,	1.52793	1.55904	1.47308	1.59424	1.47189	1.62958	1.77922	1.71595	1.69946	1.51833	1.54117	1.74866
b0611	rna	chr	-	643419,	644226,	-0.29509	0.336722	0.113879	0.678355	0.732331	0.920525	0.595422	1.02287	2.50819	0.0625095	0.756762	0.869753
b0631	ybeD	chr	-	661601,	661865,	-0.254836	0.212314	0.31077	0.137702	0.303312	-0.00194524	0.907785	0.155442	1.77289	0.109629	0.155284	0.690184
b0659	ybeY	chr	-	691096,	691564,	-1.50235	-1.32218	-1.49523	-0.851736	-0.698433	-1.1867	-0.476824	-0.991024	-0.359362	-1.44305	-0.860774	-0.67504
b0660	ybeZ	chr	-	691560,	692601,	-0.171325	0.118915	0.189485	0.309782	0.053918	0.0731358	0.615524	0.688652	1.10575	0.0698163	0.150403	0.719222
b0676	nagC	chr	-	699596,	700817,	-2.14047	-2.12082	-2.27395	-1.43584	-1.88787	-2.03015	-0.913182	-1.62065	-1.13611	-2.18429	-1.77266	-1.19533
b0687	seqA	chr	+	712209,	712755,	0.327304	0.763019	0.160952	0.685347	0.414936	0.805795	1.1765	0.841376	0.605901	0.394517	0.576828	0.957745
b0688	pgm	chr	+	712780,	714421,	0.453072	0.547256	0.488801	0.601958	0.580775	0.522572	0.809719	0.709227	0.658539	0.49318	0.577098	0.754493
b0695	kdpD	chr	-	720952,	723637,	-2.88937	-2.83104	-2.55803	-3.45726	-3.32256	-2.91236	-3.12806	-3.23473	-3.76142	-2.76565	-3.28975	-3.26887
b0726	sucA	chr	+	757928,	760730,	-1.14899	-1.22449	-1.31397	-1.20595	-1.16962	-1.26993	1.31284	1.37653	1.09597	-1.23818	-1.20146	1.30483
b0727	sucB	chr	+	760744,	761962,	-0.234877	-0.252649	-0.204983	1.03674	1.17425	0.990962	2.11052	2.15779	2.16526	-0.230175	1.09476	2.14388
b0728	sucC	chr	+	762236,	763403,	-0.613592	-0.563037	-0.584071	0.555189	0.643967	0.423443	2.56652	2.3058	2.52753	-0.580611	0.569599	2.46723
b0729	sucD	chr	+	763402,	764272,	-0.893011	-0.939577	-0.920418	0.574658	0.638249	0.500565	2.52721	2.38029	2.34386	-0.916615	0.587544	2.45412
b0734	cydB	chr	+	772264,	773404,	1.19637	1.17347	1.16661	1.01011	1.07317	0.961195	-0.735887	-0.662442	-0.86631	1.17543	1.03291	-0.724528
b4515	ybgT	chr	+	773418,	773532,	1.36819	1.1196	1.16344	0.62248	0.826542	0.662003	-0.685116	-0.32967	-0.494724	1.20674	0.712089	-0.560347
b0739	tolA	chr	+	775564,	776830,	-1.78732	-1.27754	-1.60729	-1.91989	-2.25523	-1.92731	-2.78517	-2.96849	-3.41835	-1.56313	-2.08964	-2.98048
b0740	tolB	chr	+	776962,	778255,	0.100651	0.330161	0.0722655	-0.00513548	0.0061942	-0.0283677	-0.366287	-0.312952	-0.351742	0.163955	-0.00275079	-0.345463
b0756	galM	chr	-	787019,	788060,	-0.901792	-0.86746	-0.678445	-0.121272	-0.272344	-0.500938	0.684438	0.671038	1.07043	-0.809341	-0.255096	0.729184
b0757	galK	chr	-	788053,	789202,	0.85941	0.577731	0.634447	1.04036	0.815778	0.89574	2.05331	2.35959	1.59106	0.672443	0.913776	2.0658
b0783	moaC	chr	+	817792,	818278,	0.165799	0.205449	-0.19364	0.204123	0.0666007	-0.278493	-1.16048	-1.31795	-1.5256	0.0346103	0.0137295	-1.28437
b0784	moaD	chr	+	818270,	818516,	-0.115376	0.370695	-0.636019	-0.513415	-0.412998	-0.439877	-1.64773	-1.12419	-1.47984	-0.202257	-0.449375	-1.43896
b0833	yliE	chr	+	872201,	874550,	-2.58053	-3.05485	-2.68873	-2.5472	-2.57518	-2.86232	-2.21212	-2.86116	-2.44119	-2.77727	-2.64529	-2.5502
b0840	deoR	chr	-	881198,	881957,	-1.16876	-1.3146	-1.39099	-1.5339	-1.42296	-1.24597	-1.52038	-1.82089	-1.84411	-1.3159	-1.43305	-1.64286
b0852	rimK	chr	+	891189,	892092,	-2.87145	-2.74329	-2.90136	-2.97438	-3.30029	-2.97126	-3.6969	-3.86661	-3.86527	-2.84303	-3.12793	-3.78011
b0861	artM	chr	-	900088,	900757,	-0.936023	-0.760447	-1.31273	-1.50867	-1.20795	-0.64933	-1.49063	-1.46717	-0.90685	-1.02073	-1.24738	-1.39167
b0862	artQ	chr	-	900756,	901473,	-0.639394	-1.37026	-1.17463	-0.953489	-1.1909	-1.38305	-1.49801	-1.15004	-1.75157	-1.12048	-1.12453	-1.40064
b0863	artI	chr	-	901479,	902211,	1.44125	1.74679	1.48711	1.46269	1.64444	1.3958	1.47077	0.863769	1.46355	1.55607	1.5218	1.25503
b0864	artP	chr	-	902228,	902957,	-0.228415	-0.231896	-0.465865	-0.622191	-0.753363	-0.447696	-0.713022	-0.857758	-0.77192	-0.322217	-0.655826	-0.778747
b0890	ftsK	chr	+	932446,	936436,	-2.16701	-2.27189	-2.2334	-2.56208	-2.58946	-2.46006	-2.62783	-2.70982	-2.80869	-2.22945	-2.55983	-2.65688
b0893	serS	chr	+	938650,	939943,	0.490531	0.736231	0.65876	0.80855	0.67673	0.683573	0.839739	1.01257	0.963226	0.64175	0.723048	0.916998
b0924	mukB	chr	+	975548,	980009,	-1.69842	-1.72354	-1.58632	-1.90697	-1.72957	-2.01729	-1.86959	-1.78882	-2.00723	-1.66088	-1.8448	-1.87291
b0926	ycbK	chr	+	982297,	982846,	-0.471978	-0.660326	-0.613326	-0.382908	-0.460286	-0.501232	-0.0200002	-0.0724556	0.25821	-0.591303	-0.449375	-0.0180253
b0928	aspC	chr	-	983741,	984932,	1.56719	1.83667	1.44438	1.7806	2.06956	1.55687	2.15116	1.97933	2.22301	1.60214	1.85833	2.09083
b0947	ycbX	chr	-	1005713,	1006823,	0.702133	1.31552	0.761026	0.697762	1.03362	0.594595	0.570202	0.189206	0.166399	0.918317	0.827963	0.33323
b0950	pqiA	chr	+	1011223,	1012477,	-1.7438	-2.35036	-1.99744	-2.24234	-1.96326	-1.90087	-2.2276	-2.24961	-2.75157	-2.04591	-2.05076	-2.34072
b0962	helD	chr	+	1023693,	1025748,	-1.17428	-1.33585	-1.02807	-1.37263	-1.04384	-1.19327	-1.09703	-1.0465	-1.82196	-1.17612	-1.17657	-1.2153
b0970	yccA	chr	-	1029981,	1030641,	-0.484503	-0.350769	-0.485834	-0.146218	0.0336794	-0.0926657	-0.117265	-0.0464154	0.0807795	-0.440983	-0.0577961	-0.064276
b0981	etk	chr	-	1041252,	1043433,	-1.30166	-1.79806	-1.1108	-1.18185	-1.57518	-1.80133	-2.24354	-1.84088	-1.46628	-1.42042	-1.44392	-1.9966
b1034	ycdX	chr	+	1098101,	1098839,	0.779104	0.893237	0.548165	0.949989	0.860177	1.08635	1.17233	0.906022	1.03593	0.733289	0.930698	1.06603
b1084	rne	chr	-	1140404,	1143590,	-0.461152	-0.406281	-0.33338	-0.282786	-0.159484	-0.433059	-0.218705	-0.0997304	-0.397059	-0.391073	-0.253034	-0.206774
b1093	fabG	chr	+	1149892,	1150627,	-0.448949	-0.507662	-0.500097	-0.813305	-0.753984	-0.754605	-1.19018	-1.11472	-1.23372	-0.491769	-0.775977	-1.17466
b1107	nagZ	chr	+	1163317,	1164343,	-0.889373	-0.349087	-0.507727	-0.445301	-0.48835	-0.394757	-0.461239	-0.412725	-0.29214	-0.564522	-0.458493	-0.413403
b1108	ycfP	chr	+	1164365,	1164908,	0.551449	0.549884	0.353393	0.543405	0.662621	0.35067	0.702792	0.514211	0.515682	0.489055	0.554136	0.587508
b1119	nagK	chr	+	1177815,	1178727,	-1.62428	-1.15468	-1.50654	-1.50923	-1.93105	-1.00688	-1.47095	-1.97186	-1.89979	-1.4316	-1.6338	-1.74297
b1120	cobB	chr	+	1178742,	1179582,	0.728698	0.723684	0.955995	0.333089	0.112808	0.246834	-0.253591	-0.0551545	0.411869	0.809344	0.210618	-0.0365031
b1129	phoQ	chr	-	1187538,	1188999,	-2.51238	-2.63788	-2.73724	-2.64673	-2.66307	-2.94407	-3.59915	-2.68469	-3.60627	-2.62265	-2.71933	-3.32652
b1130	phoP	chr	-	1188998,	1189670,	-0.568853	0.0291876	-0.173747	0.340105	0.152165	0.060328	0.312774	0.0793652	0.329687	-0.223652	0.20176	0.237249
b1162	ycgE	chr	-	1212550,	1213282,	-2.28146	-2.004	-2.1888	-2.6517	-2.09852	-2.09133	-2.92533	-2.16993	-2.09188	-2.14637	-2.33817	-2.53004
b1179	ycgL	chr	+	1226903,	1227230,	-0.807748	-1.12036	-0.875062	-0.817598	-0.889133	-1.07365	-0.27473	-0.423268	-0.466277	-0.949119	-0.91886	-0.407644
b1198	dhaM	chr	-	1246918,	1248340,	-0.955001	-1.01352	-0.991872	-0.731564	-0.746818	-0.604936	0.89203	0.971654	1.46183	-0.987429	-0.723735	0.994411
b1199	dhaL	chr	-	1248347,	1248980,	-0.408731	-0.47324	-0.499283	-0.0464393	-0.377651	-0.494608	1.90787	1.68724	1.82936	-0.474689	-0.304035	1.82241
b1222	narX	chr	-	1275044,	1276841,	-1.00867	-1.28906	-0.887747	-0.623091	-1.1394	-1.77939	-2.06638	-2.0893	-1.91991	-1.06718	-1.1087	-2.08279
b1234	rssA	chr	+	1288428,	1289373,	-0.993208	-0.702468	-0.381446	-0.723067	-0.443569	-0.216371	0.165299	-0.493524	0.166399	-0.662791	-0.517762	-0.14951
b1237	hns	chr	-	1291731,	1292145,	0.881699	0.823475	0.783185	1.38835	1.32192	1.59373	1.4988	1.48837	1.79241	0.825043	1.39229	1.53222
b1243	oppA	chr	+	1299205,	1300837,	-0.32468	-0.212728	-0.184816	0.108325	0.118187	0.161767	0.152695	0.0808986	0.173808	-0.231253	0.118691	0.124828
b1247	oppF	chr	+	1303787,	1304792,	-0.652387	-0.670297	-0.316276	-0.192995	-0.144412	-0.10501	-0.0315226	-0.0243907	0.0466079	-0.535766	-0.156688	-0.00678345
b1267	yciO	chr	+	1322121,	1322742,	0.327858	0.846005	0.965004	1.10546	1.03189	1.20666	1.06673	0.907777	2.13754	0.72826	1.09004	1.12085
b1280	yciM	chr	+	1338581,	1339751,	-2.57903	-2.61217	-2.64541	-2.72335	-2.59859	-2.63071	-2.62467	-2.86116	-2.86068	-2.6158	-2.65554	-2.71793
b1323	tyrR	chr	+	1384743,	1386285,	0.0768965	0.54882	0.30728	0.41216	0.0339442	0.232025	0.365755	-0.0775277	0.145032	0.316179	0.204756	0.150851
b1324	tpx	chr	-	1386328,	1386835,	1.35534	1.37654	1.14129	1.47208	1.24975	1.33587	1.55304	1.73281	1.55733	1.27321	1.3424	1.61614
b1331	insH	chr	+	1394099,	1395116,	0.09763	-0.102324	-0.0875579	-0.585788	-0.686737	-0.685399	-0.469534	-0.921597	-0.723783	-0.0433404	-0.655615	-0.672296
b1378	ydbK	chr	-	1435283,	1438808,	-0.341466	-0.303743	-0.222276	-0.603006	-0.420918	-0.173074	-0.517675	-0.459293	-0.610233	-0.274615	-0.44375	-0.519669
b4493	gapC	chr	-	1487736,	1488737,	-0.90773	-0.982485	-1.11665	-0.485628	-0.817804	-0.708224	-0.583739	-0.525995	-0.347154	-1.02164	-0.691509	-0.530333
b1418	cybB	chr	+	1488925,	1489456,	0.793864	0.715444	0.809194	0.805957	0.956483	0.961695	1.48665	0.868839	0.702398	0.775265	0.902786	1.07563
b1431	ydcL	chr	+	1500480,	1501149,	-0.416121	-0.274036	-0.230024	-0.194274	-0.417369	-0.0753389	0.200266	0.521479	0.183753	-0.300067	-0.278602	0.303466
b1453	ansP	chr	-	1522504,	1524004,	-0.716536	-0.205838	-1.13242	-1.55613	-1.19313	-0.981906	-1.71302	-1.90458	-1.52498	-0.770299	-1.25855	-1.74574
b1529	marC	chr	-	1616266,	1616932,	-0.293355	0.218389	-0.959319	-0.538512	-0.701934	-0.257013	-0.702453	-1.36026	-1.06297	-0.438379	-0.55729	-0.979744
b1531	marA	chr	+	1617597,	1617981,	-0.0413758	0.0690596	0.351074	0.846842	1.34284	0.320296	0.0342115	0.496007	2.38266	0.142137	0.892496	0.401157
b4599	yneM	chr	+	1620669,	1620765,	-3.78614	-3.78009	-3.82623	-4.2348	-4.16707	-4.05143	-4.33817	-4.45542	-4.38078	-3.7854	-4.17569	-4.41773
b1540	ydfH	chr	+	1626375,	1627062,	-1.5228	-2.12119	-2.01126	-0.570966	-0.400492	-1.05069	-1.24354	-1.01922	0.346131	-1.93588	-0.593497	-1.02831
b4600	ydfJ	chr	-	1629025,	1650862,	-5.38751	-5.38635	-5.40364	-4.51026	-4.7008	-4.71806	-4.49072	-4.76271	-4.15779	-5.39684	-4.6366	-4.58302
b1550	gnsB	chr	-	1635632,	1635806,	-3.90815	-3.98518	-4.02481	-3.65554	-3.85758	-3.37537	-3.39655	-3.72118	-2.8005	-3.97651	-3.70341	-3.43643
b1591	dmsD	chr	+	1662529,	1663144,	0.0479717	-0.604073	-0.462177	-0.102413	-0.225496	-0.938837	-0.98367	-0.333786	-0.129242	-0.379731	-0.309444	-0.62642
b1593	ynfK	chr	-	1664547,	1665243,	0.245557	-0.143011	0.528108	-0.0479652	-0.272364	0.391697	-1.62282	-1.32802	-1.16988	0.194163	-0.0788836	-1.4515
b1623	add	chr	+	1700256,	1701258,	1.28938	0.957708	1.20194	2.42243	2.07316	2.8378	2.69774	3.1241	2.48723	1.13168	2.32101	2.80559
b4409	blr	chr	+	1702574,	1702700,	-2.64502	-2.5032	-2.24914	-2.69319	-2.96829	-3.3863	-3.9237	-4.03659	-3.66869	-2.4548	-2.95244	-3.88212
b1638	pdxH	chr	-	1715374,	1716031,	0.439935	0.219998	0.616776	1.21435	1.25848	0.876956	0.883345	0.841376	2.34108	0.410683	1.16534	1.05725
b1650	nemA	chr	+	1724682,	1725780,	0.229568	0.452061	0.33225	0.5694	1.028	0.200774	0.57238	1.20609	0.741808	0.330531	0.716729	0.81914
b1651	gloA	chr	+	1725860,	1726268,	2.15771	2.47018	1.85425	1.66929	1.48899	1.72764	1.64378	1.54403	1.39514	2.12209	1.59492	1.574
b1656	sodB	chr	+	1733401,	1733983,	1.42067	1.22409	1.24564	0.928154	0.862229	1.03303	0.875733	0.80339	0.845321	1.28832	0.916409	0.835605
b1663	mdtK	chr	+	1741480,	1742854,	0.194811	0.302135	0.788479	0.11693	0.476231	0.614615	-0.28321	-0.729365	-0.382513	0.439193	0.361344	-0.462151
b1664	ydhQ	chr	-	1742894,	1744151,	0.46516	0.405613	0.573981	1.03849	0.19741	0.397144	1.14175	1.10425	1.97579	0.47411	0.501028	1.21976
b1677	lpp	chr	+	1755444,	1755681,	-2.52112	-2.53645	-2.53929	-2.02121	-2.04461	-1.97243	-1.94472	-1.93147	-1.83947	-2.5343	-2.02538	-1.92071
b1688	ydiK	chr	+	1767097,	1768210,	-0.558104	0.0587319	-0.558569	-0.95041	-1.01567	-0.909791	-1.23794	-1.36026	-0.940911	-0.37549	-0.97001	-1.23995
b1706	ydiU	chr	-	1787831,	1789268,	-1.39624	-1.13115	-0.837579	-0.898541	-0.75106	-0.891303	-0.666329	-0.793217	-0.235472	-1.0942	-0.834198	-0.660344
b1712	ihfA	chr	-	1793276,	1793576,	0.747857	0.569777	0.508481	0.432194	0.245874	0.851195	0.195085	0.331695	0.0389008	0.579349	0.41657	0.18818
b1715	pheM	chr	-	1797249,	1797294,	-1.59239	-1.60842	-1.58735	-2.25769	-1.3847	-2.17984	-2.68388	-2.11515	-1.34885	-1.58077	-1.94792	-2.33814
b1729	ydjN	chr	+	1808957,	1810349,	3.08429	4.04766	2.96427	-0.817707	-0.96504	-0.993446	-0.963001	-0.886327	-1.08	3.30208	-0.926563	-0.957328
b1740	nadE	chr	+	1820481,	1821309,	0.78569	0.912976	1.03421	0.987332	1.28511	1.36668	1.13426	1.06505	2.49498	0.915458	1.17918	1.23841
b1757	ynjE	chr	+	1837490,	1838798,	0.95193	1.05296	1.08422	0.912234	0.0694921	0.0731358	-1.55075	-2.18338	-1.95265	1.04012	0.309432	-1.86959
b1763	topB	chr	-	1843022,	1844984,	-1.77192	-1.88935	-1.93236	-1.92721	-1.92834	-1.75002	-2.21742	-2.08164	-2.61539	-1.87822	-1.88552	-2.29444
b1766	sppA	chr	+	1846860,	1848717,	-0.341096	-0.740409	-0.855633	-1.02892	-1.1873	-0.972737	-1.31569	-1.18071	-1.33981	-0.71259	-1.08666	-1.28299
b1779	gapA	chr	+	1860794,	1861790,	1.70962	1.6685	1.66098	1.87362	1.91745	1.89896	1.84018	1.9049	2.0883	1.67854	1.89904	1.90246
b1780	yeaD	chr	+	1861873,	1862758,	2.13178	2.06527	2.10753	2.58461	3.13086	2.75105	3.09257	2.75522	3.44424	2.10108	2.83379	3.00215
b1806	yeaY	chr	-	1887974,	1888556,	-1.13101	-0.95858	-1.12702	-1.09101	-1.56618	-1.43703	-1.44094	-1.2246	-1.68446	-1.06257	-1.37137	-1.41843
b1809	yoaB	chr	+	1891390,	1891735,	0.356316	0.0649141	0.138964	0.793589	0.313764	0.460053	0.65864	0.631468	0.566426	0.168541	0.503525	0.642535
b1812	pabB	chr	+	1892828,	1894190,	-0.287337	-0.893821	-1.09259	-0.417915	-0.647829	-0.466108	-0.322788	-0.166247	-0.47389	-0.891634	-0.537459	-0.316551
b1841	yobA	chr	-	1922618,	1922993,	0.835823	1.11907	0.39869	1.25035	0.958148	1.61844	1.61587	1.10735	1.71276	0.737344	1.17313	1.39944
b1842	holE	chr	+	1923131,	1923362,	-0.836758	-1.2065	-0.861636	-0.278793	-0.159407	-0.598704	0.117919	0.0629535	-0.189692	-0.977905	-0.286144	0.0757812
b1850	eda	chr	-	1930138,	1930780,	1.60842	1.83766	1.46488	1.29161	1.83129	1.48704	1.12755	1.02131	0.933928	1.62306	1.54379	1.06899
b1851	edd	chr	-	1930816,	1932628,	-0.765315	-1.50909	-1.08414	-1.45218	-0.949283	-1.38084	-1.60081	-2.11515	-2.66329	-1.17838	-1.18788	-2.04108
b1852	zwf	chr	-	1932862,	1934338,	0.568929	1.0849	1.14141	0.992411	1.01644	1.1009	1.08516	1.18476	1.19856	0.951823	1.02263	1.13792
b1858	znuC	chr	+	1940685,	1941441,	-1.47696	-1.10152	-0.62749	-0.681962	-0.148131	-1.06437	-0.713022	-0.600392	-0.169884	-1.04626	-0.508796	-0.637916
b1861	ruvA	chr	-	1943388,	1944000,	0.437792	0.286511	0.0193071	0.215468	0.26154	0.00602159	0.182728	-0.137866	-0.295415	0.21738	0.201326	-0.00954189
b1869	yecN	chr	+	1950289,	1950685,	-1.88606	-1.54944	-1.88715	-2.47367	-2.29902	-2.3274	-2.21212	-2.92176	-3.02366	-1.77368	-2.39493	-2.60756
b1908	yecA	chr	-	1988977,	1989643,	-0.0484652	-0.272821	-0.341461	-0.340235	0.0916149	-0.327402	0.344693	0.543066	-0.00941928	-0.236302	-0.141735	0.333281
b1916	sdiA	chr	-	1994133,	1994856,	-1.19244	-1.46558	-1.39362	-1.2541	-1.30486	-1.3274	-0.800895	-0.997688	-1.2475	-1.37673	-1.29396	-0.968034
b1929	yedE	chr	+	2006300,	2007506,	0.846987	0.842386	0.957326	-1.88255	-1.95705	-1.58888	-2.27395	-2.37075	-2.36958	0.892666	-1.86481	-2.31081
b1958	yedI	chr	-	2026472,	2027390,	-0.487685	-0.709557	-0.14746	-0.692809	-0.594845	-0.0248394	-0.333089	-0.390632	0.508188	-0.433719	-0.563224	-0.261431
b2016	yeeZ	chr	-	2086327,	2087152,	0.0664275	0.627093	0.480292	0.54369	0.346024	0.491151	0.783992	0.442181	0.877422	0.40414	0.449479	0.680806
b4571	wbbL	chr	-	2099419,	2101413,	0.584043	0.749387	0.78365	0.905082	0.816929	0.624399	1.1674	0.875191	1.55258	0.715449	0.800945	1.08843
b2032	wbbK	chr	-	2101414,	2102533,	0.281038	0.413374	0.531013	0.579015	0.594218	1.21891	0.53811	0.82662	1.21259	0.426548	0.701144	0.736611
b2035	rfc	chr	-	2104083,	2105250,	-1.39382	-1.27256	-1.49271	-1.26833	-1.53688	-1.10376	-1.34338	-1.43397	0.637471	-1.39104	-1.36974	-1.18657
b2036	glf	chr	-	2105249,	2106353,	0.511815	0.54583	0.532128	0.56516	0.616172	0.686113	0.921465	0.593486	1.74095	0.532157	0.604805	0.87856
b2091	gatD	chr	-	2169856,	2170897,	0.902345	0.811036	0.857306	1.76562	1.65636	1.56709	3.03663	2.94632	3.02456	0.852689	1.67731	3.00155
b2094	gatA	chr	-	2172618,	2173071,	0.176625	0.0281535	-0.0663822	0.102469	0.175601	0.195323	1.70418	1.7712	1.48589	0.0264293	0.14215	1.68716
b2097	fbaB	chr	-	2175533,	2176586,	0.420483	0.082801	0.0748594	0.655017	0.534991	-0.36776	0.480457	0.691404	1.56888	0.151251	0.364613	0.704174
b2132	bglX	chr	-	2217713,	2220011,	0.180576	-0.0778012	0.10237	0.147499	-0.0952906	-0.0436092	-0.214278	0.175795	-0.732923	0.0542478	-0.00682511	-0.175691
b2134	pbpG	chr	-	2221959,	2222892,	0.194692	-0.179896	-0.390704	0.424473	0.170937	0.238195	0.545712	0.681562	0.777649	-0.17823	0.268713	0.627459
b2157	yeiE	chr	-	2246758,	2247640,	-0.902793	-0.805859	-1.2402	-0.962235	-0.601925	-0.991119	-0.29049	-0.122098	-1.35004	-1.01064	-0.82516	-0.448477
b2159	nfo	chr	+	2248861,	2249719,	0.208497	0.739088	1.29174	0.561813	1.37097	0.659422	1.28386	1.16678	1.0597	0.755174	0.905878	1.19926
b2167	fruA	chr	-	2257740,	2259432,	-1.17446	-1.13595	-1.17833	-0.775912	-0.812411	-1.36175	-0.668628	-0.497761	-0.280308	-1.18751	-0.888397	-0.546203
b2209	eco	chr	+	2301926,	2302415,	2.162	1.80806	1.76659	2.67803	1.98124	2.57692	2.08108	2.19622	3.00066	1.88047	2.31163	2.23293
b2216	rcsD	chr	+	2311509,	2314182,	-1.64446	-1.76849	-1.85514	-1.90679	-2.18179	-1.92351	-2.41063	-2.23863	-1.85438	-1.76932	-2.04394	-2.27979
b2218	rcsC	chr	-	2315048,	2317898,	-2.68475	-2.3529	-2.47021	-3.07642	-3.2808	-3.52157	-3.3667	-3.38693	-3.35751	-2.48347	-3.24961	-3.34603
b2278	nuoL	chr	-	2391226,	2393068,	-1.19539	-1.24906	-1.27518	-0.744809	-0.655758	-0.914786	-0.289398	-0.185812	-0.635921	-1.24558	-0.724011	-0.307793
b2279	nuoK	chr	-	2393064,	2393367,	-0.512199	-0.676293	-0.515686	0.430384	0.902337	0.371557	1.01513	0.974726	0.497944	-0.568013	0.611792	0.923858
b2280	nuoJ	chr	-	2393363,	2393918,	-0.283132	-0.132949	-0.293732	0.396777	0.626024	0.294086	1.52685	1.53238	1.59375	-0.238852	0.479053	1.55003
b2281	nuoI	chr	-	2393929,	2394472,	-0.414898	-0.492158	-0.495363	0.663359	0.687393	0.79326	1.38052	1.92168	1.15342	-0.48002	0.696854	1.51146
b2282	nuoH	chr	-	2394486,	2395464,	-0.424894	-0.30199	-0.573055	-0.103961	0.0995867	-0.0700365	1.19119	1.22857	1.11046	-0.453044	-0.00395792	1.19863
b2283	nuoG	chr	-	2395460,	2398187,	-0.592133	-0.491903	-0.620882	-0.10181	-0.0452522	-0.275187	0.771796	0.787797	0.613329	-0.570217	-0.105703	0.751199
b2284	nuoF	chr	-	2398239,	2399577,	-0.157982	-0.0846223	-0.168583	0.181026	0.191252	0.207193	1.47124	1.26379	1.04233	-0.130185	0.191344	1.32498
b2285	nuoE	chr	-	2399573,	2400074,	0.127108	-0.0804494	-0.194373	0.102066	0.126856	0.0865971	1.21071	1.12295	1.04619	-0.0802046	0.114418	1.16119
b2297	pta	chr	+	2412768,	2414913,	1.60927	1.804	1.64329	1.48152	1.51378	1.52985	0.404646	0.516464	0.0102439	1.68762	1.50565	0.367461
b2298	yfcC	chr	+	2415102,	2416623,	-0.999992	-0.693303	-0.451835	-0.800143	-1.27713	-0.64933	-3.96936	-3.06386	-3.65782	-0.698973	-0.999403	-3.61131
b2300	yfcE	chr	-	2417255,	2417810,	1.03916	0.825864	1.00243	0.50527	0.76275	1.19532	-0.102849	0.236109	-0.0853504	0.95881	0.730551	-0.00151832
b2314	dedD	chr	-	2429043,	2429706,	-1.37186	-1.40853	-1.15886	-1.7883	-1.40503	-1.26467	-1.86042	-1.68888	-1.72193	-1.31495	-1.51772	-1.76938
b2320	pdxB	chr	-	2434736,	2435873,	-0.189313	-0.0478049	-0.117869	0.0680991	0.0494571	-0.59464	-0.287889	-0.250911	-0.319078	-0.112168	-0.061245	-0.264542
b2331	yfcN	chr	+	2446627,	2447179,	-1.02367	-1.04343	-0.367771	-0.897593	-0.716372	-0.883795	-0.613487	-0.797322	-1.37825	-0.782097	-0.817415	-0.822642
b2340	sixA	chr	-	2454348,	2454834,	-1.49066	-1.65003	-1.6498	-1.77766	-2.16435	-1.81926	-2.36441	-1.83105	-1.99904	-1.60951	-1.97093	-2.13594
b2381	ypdB	chr	+	2498404,	2499139,	-0.839068	-1.16476	-0.665239	-1.38051	-0.94652	-0.692399	-1.30703	-1.31904	-2.03238	-0.888723	-1.05835	-1.47293
b2410	yfeH	chr	+	2524967,	2525966,	-0.615198	-0.54822	-1.13135	-1.19849	-0.845284	-1.3274	-1.51622	-1.13787	-0.857606	-0.783168	-1.04828	-1.3077
b2411	ligA	chr	-	2526182,	2528198,	-0.165139	-0.00688293	0.0556392	0.206092	0.357706	0.25756	0.402854	0.575488	0.180011	-0.0209727	0.288726	0.419797
b2416	ptsI	chr	+	2532087,	2533815,	-0.414473	-0.522022	-0.357284	0.0441475	0.0995001	-0.0567142	-0.0561475	0.0590669	0.236506	-0.43059	0.0512689	0.0284359
b2417	crr	chr	+	2533855,	2534365,	0.818924	0.833129	0.779527	0.732805	0.610897	0.667038	0.499854	0.42994	0.975314	0.807632	0.661617	0.513616
b2435	amiA	chr	+	2550373,	2551243,	-0.519423	-0.66201	-0.79985	-1.02271	-0.8583	-0.771586	-1.00479	-1.43555	-0.90685	-0.681814	-0.899231	-1.14354
b2470	acrD	chr	+	2585616,	2588730,	-1.26879	-1.79344	-0.984443	-1.3404	-1.6222	-2.12326	-2.28981	-1.82184	-2.41089	-1.4069	-1.63027	-2.17718
b4606	ypfM	chr	-	2588828,	2588888,	-4.39771	-4.63039	-4.2628	-4.18642	-4.2309	-3.57193	-3.36109	-3.5433	-2.97874	-4.42154	-4.10976	-3.45378
b2472	dapE	chr	+	2589628,	2590756,	-0.650586	-0.844272	-0.666613	-0.293911	-0.642502	-0.849629	-0.04757	-0.141551	-0.955759	-0.716451	-0.563522	-0.257469
b2477	nlpB	chr	-	2595852,	2596887,	-0.922483	-0.859394	-1.01241	-1.07987	-0.95288	-0.994297	-1.18115	-1.10546	-1.231	-0.941749	-1.02005	-1.15809
b2478	dapA	chr	-	2596903,	2597782,	-0.142849	-0.360362	-0.29141	-0.444614	-0.346188	-0.556013	-0.635113	-0.590604	-0.30446	-0.277259	-0.412538	-0.577904
b2512	yfgL	chr	-	2635495,	2636674,	0.0907825	0.162992	0.233303	-0.0160174	-0.130937	-0.199165	-0.511798	-0.36401	-0.447418	0.172774	-0.101343	-0.445567
b2523	pepB	chr	-	2653096,	2654380,	1.84161	1.66034	1.71168	1.62236	1.70736	1.45919	1.44167	1.33011	1.32049	1.72313	1.62893	1.37656
b2531	iscR	chr	-	2659664,	2660153,	0.999691	1.27017	1.06984	1.45391	1.72759	1.22868	1.67733	1.70528	1.75612	1.11366	1.51853	1.69936
b2553	glnB	chr	-	2685091,	2685430,	-1.26958	-1.18455	-1.05756	-1.35107	-1.41889	-1.32862	-1.40115	-1.24652	-1.6408	-1.17042	-1.38567	-1.40876
b2554	yfhA	chr	-	2685490,	2686825,	-1.34977	-1.16537	-1.37436	-1.21498	-1.13335	-0.52734	-0.290331	-0.0684918	-0.333383	-1.29967	-1.07009	-0.229049
b2580	ung	chr	+	2714775,	2715465,	0.952283	0.813972	1.44716	1.39542	0.34284	0.592745	0.834878	1.08663	0.195355	1.06666	0.693122	0.797051
b2592	clpB	chr	-	2729621,	2732195,	-3.81144	-3.85523	-3.78443	-3.25276	-3.37531	-3.31538	-3.42189	-3.33848	-2.98294	-3.81563	-3.32048	-3.3373
b2593	yfiH	chr	-	2732324,	2733056,	-0.858346	-0.523675	-0.586456	-0.780485	-0.350078	-1.28433	-1.6338	-1.21652	-1.40435	-0.632222	-0.746761	-1.45797
b2595	yfiO	chr	+	2734167,	2734905,	-0.657213	-0.615515	-0.403267	-0.170147	-0.230609	-0.200756	-0.118419	-0.386103	-0.0672428	-0.551565	-0.199786	-0.209497
b2598	pheL	chr	+	2735620,	2735668,	-2.50398	-2.65023	-2.71854	-2.14404	-2.00886	-1.91007	-1.82675	-1.75597	-1.15931	-2.60122	-2.03781	-1.69911
b2616	recN	chr	+	2749816,	2751478,	-0.422805	-0.208543	-0.263828	-0.0293495	-0.288362	-0.559895	-0.0289958	0.710131	-0.0258376	-0.296112	-0.266609	0.194131
b2617	smpA	chr	+	2751626,	2751968,	0.281769	0.194242	0.335772	-0.123972	-0.00504033	0.158025	0.249028	-0.445914	-0.116418	0.259884	-0.0176233	-0.0624908
b2630	rnlA	chr	+	2763939,	2765013,	-2.59685	-2.57172	-2.6863	-1.97154	-2.13078	-2.13783	-2.27945	-1.92214	-1.66526	-2.6206	-2.06996	-2.09648
b2670	ygaW	chr	+	2797185,	2797635,	-0.550653	-0.0670137	-0.340804	-0.670801	-0.221216	-0.227097	-1.18946	-1.00815	-0.334271	-0.315493	-0.398749	-0.977107
b2688	gshA	chr	-	2812904,	2814461,	-0.399211	-0.172916	-0.176675	-0.81683	-0.563169	-0.6881	-0.722113	-0.86887	-1.02378	-0.23546	-0.679028	-0.812878
b2703	srlE	chr	+	2824413,	2825373,	-0.480975	-0.59704	-0.302048	0.79621	0.62506	1.22132	3.30671	3.04301	2.97394	-0.461342	0.786816	3.15843
b2704	srlB	chr	+	2825383,	2825755,	0.538973	0.452555	1.07984	2.03776	2.18206	2.56351	2.46338	2.56529	2.38217	0.689393	2.18658	2.49571
b2712	hypF	chr	-	2833194,	2835447,	-0.191401	-0.918031	-0.381446	-1.90977	-2.06562	-2.1639	-1.9851	-2.36026	-2.14389	-0.540992	-2.02012	-2.13034
b2744	surE	chr	-	2867534,	2868296,	-1.10069	-0.979172	-1.71932	-1.49154	-1.70329	-1.47389	-1.28118	-1.28811	-2.14059	-1.35865	-1.58854	-1.48999
b2745	truD	chr	-	2868276,	2869326,	-0.547919	-0.516599	-0.439478	-1.19734	-1.20592	-0.98442	-1.5542	-1.51587	-1.80691	-0.50606	-1.16728	-1.59105
b2785	rumA	chr	-	2911720,	2913022,	-1.79389	-1.59946	-1.45591	-1.94481	-1.98531	-1.67279	-2.58178	-2.71521	-1.76389	-1.603	-1.90847	-2.45603
b2808	gcvA	chr	-	2939671,	2940589,	-0.695944	-2.04465	-1.0066	-0.324805	-0.877358	-1.31491	-0.982629	-0.459794	-0.383288	-1.37251	-0.811945	-0.759564
b2819	recD	chr	-	2948656,	2950483,	-1.28101	-1.04207	-0.949834	-1.39104	-1.46205	-1.35165	-1.26236	-1.78652	-2.05124	-1.08012	-1.4241	-1.6078
b2821	ptrA	chr	-	2954017,	2956906,	-0.83133	-1.04465	-0.500536	-1.02841	-0.560484	-0.705425	-0.886273	-0.825922	-0.496112	-0.797117	-0.783641	-0.81019
b2837	galR	chr	+	2974620,	2975652,	-0.63802	-0.602555	-0.480264	-0.145697	-0.681877	-0.454314	-0.119792	-0.504648	-0.178929	-0.560227	-0.461695	-0.316551
b2865	ygeR	chr	-	2997157,	2997913,	-1.09219	-1.42073	-1.2861	-1.78671	-1.81754	-1.62996	-1.90011	-1.62919	-1.86176	-1.29511	-1.76782	-1.81149
b2894	xerD	chr	-	3036868,	3037765,	-1.92751	-1.64454	-1.34553	-1.66313	-2.35157	-1.98637	-2.37013	-2.61458	-2.81939	-1.62031	-2.05582	-2.53592
b2896	ygfX	chr	-	3038437,	3038845,	-2.57315	-2.61671	-2.74609	-2.98302	-2.53808	-2.53149	-2.6806	-2.6722	-3.20005	-2.68748	-2.72341	-2.81053
b2897	ygfY	chr	-	3038825,	3039092,	-0.487983	-0.946321	-0.565871	-0.53931	-0.311235	-0.689076	-0.362989	-0.73451	0.271954	-0.693153	-0.470748	-0.444062
b2900	yqfB	chr	-	3041333,	3041645,	0.163739	-0.0112354	0.227285	-0.0136037	-0.164725	1.29318	0.570432	0.266284	2.1229	0.131691	0.114889	0.58061
b2903	gcvP	chr	-	3044189,	3047063,	0.0574929	0.0954919	0.132197	0.429963	0.575282	0.23785	1.52445	1.74835	1.45455	0.096425	0.456908	1.59037
b2906	visC	chr	-	3049136,	3050339,	0.0232436	0.137185	0.410237	-0.00781804	0.326101	0.123259	-0.00361257	-0.141486	-0.228152	0.200846	0.163164	-0.103876
b2938	speA	chr	-	3081956,	3083933,	-0.0806608	0.11276	0.211183	-0.0530713	-0.0217182	-0.0339621	-0.418516	-0.621379	-0.534079	0.0950294	-0.0341201	-0.501899
b2939	yqgB	chr	-	3083941,	3084073,	-0.601796	0.119107	0.108181	-0.69345	-0.512	-0.64933	-1.86503	-0.99413	-1.32189	-0.113143	-0.610529	-1.52832
b2947	gshB	chr	+	3089899,	3090850,	1.11862	1.13795	1.36278	1.40907	1.31841	1.46753	1.49835	1.52059	1.4507	1.21935	1.37581	1.49204
b2952	yggT	chr	+	3093841,	3094408,	0.817108	0.655692	0.887124	0.526672	0.912904	0.459194	0.445805	0.171389	0.238828	0.789557	0.665461	0.317841
b2957	ansB	chr	-	3097703,	3098750,	2.36692	2.26386	1.89499	-1.0353	-1.20519	0.0046739	-2.24828	-2.10168	-1.70594	2.1299	-0.925813	-2.11117
b2958	yggN	chr	-	3098925,	3099645,	0.561752	0.583818	0.315819	0.13356	-0.294377	0.081853	-0.336647	-0.341879	-0.223777	0.436257	-0.0845104	-0.310291
b2976	glcB	chr	-	3119655,	3121827,	0.159722	1.01787	0.514217	1.03315	0.943321	0.86637	1.77118	1.41233	2.32517	0.576726	0.967834	1.6879
b2996	hybA	chr	-	3142175,	3143162,	-0.697892	-0.169427	-0.310792	-0.304047	-0.392083	-0.479405	-1.22576	0.163304	0.160265	-0.378207	-0.381764	-0.643193
b2997	hybO	chr	-	3143164,	3144283,	1.09293	1.4398	1.19334	0.114079	0.159014	-0.506372	-0.228224	-0.309079	-0.437364	1.24005	-0.0357691	-0.307532
b3005	exbD	chr	-	3148839,	3149265,	-2.38715	-2.22741	-2.09688	-1.59457	-1.90509	-1.86346	-1.3651	-1.54468	-0.947492	-2.22321	-1.80239	-1.43764
b3006	exbB	chr	-	3149271,	3150006,	0.331379	-0.300064	-0.253013	-0.308236	-0.699527	-0.51688	-1.0531	-1.46095	-1.41586	-0.143618	-0.536932	-1.26274
b3009	yghB	chr	+	3151584,	3152244,	-0.629827	-0.342025	0.37824	-1.0276	-1.00238	-0.634975	-1.18356	-1.64754	-1.43292	-0.193255	-0.937093	-1.39614
b3018	plsC	chr	-	3160765,	3161503,	0.516086	0.398961	0.0977217	0.604422	0.0307597	0.61501	0.631507	0.510107	0.184145	0.311523	0.325257	0.517131
b3019	parC	chr	-	3161736,	3163995,	-1.00387	-1.31437	-1.27529	-1.26198	-1.27974	-1.40062	-1.47022	-1.4853	-1.71197	-1.2263	-1.29309	-1.53277
b3024	ygiW	chr	-	3167305,	3167698,	-0.522801	-0.26482	-0.591369	-0.40221	-0.591928	-0.275872	0.483375	0.25033	0.822079	-0.480054	-0.471641	0.45789
b3034	nudF	chr	-	3175302,	3175932,	0.300811	-0.665588	-0.480982	0.140081	0.438418	-0.229791	-0.0559102	0.0922543	0.830116	-0.398458	0.181758	0.159516
b3038	ygiC	chr	+	3178442,	3179603,	-0.888357	-0.8158	-0.569891	-0.169849	-0.492635	-0.154935	0.343752	0.133436	0.421696	-0.748578	-0.319521	0.26414
b3054	ygiF	chr	-	3197685,	3198987,	0.10955	0.0472478	0.720722	0.210272	0.308803	0.389144	0.336966	0.767232	0.299776	0.280981	0.287591	0.462446
b3055	htrG	chr	+	3199228,	3199849,	-0.748674	-0.0110933	-0.724693	-0.242065	-0.495221	-0.11091	-0.0176359	-0.150805	0.169253	-0.495552	-0.33553	-0.0754044
b3075	ebgR	chr	+	3219487,	3220471,	-1.25861	-1.18234	-1.10134	-1.47367	-1.10282	-1.06437	-0.698072	-1.88633	-1.32189	-1.18914	-1.25597	-1.25156
b3124	garK	chr	-	3268646,	3269792,	-1.38184	-1.54749	-1.42461	-1.45034	-1.35513	-1.06437	0.129436	0.268559	-0.708436	-1.4728	-1.32908	-0.0121437
b3147	yraM	chr	+	3291421,	3293458,	0.690498	0.566772	0.448219	0.364595	0.516346	0.42282	0.231705	0.420651	0.102076	0.551127	0.435983	0.276094
b3190	yrbA	chr	-	3334570,	3334825,	2.61773	2.00882	2.34771	2.25672	2.31472	2.20367	2.29019	2.1643	2.05251	2.2796	2.27845	2.18922
b3196	yrbG	chr	+	3338296,	3339274,	-2.7297	-2.8374	-2.83457	-3.25011	-3.31235	-3.5238	-3.78998	-3.41471	-4.36175	-2.79844	-3.30577	-3.8186
b3198	kdsC	chr	+	3340294,	3340861,	-0.012644	-0.552691	0.103311	-0.0236359	-0.437046	-0.435551	-0.971334	-1.68613	-1.54777	-0.181509	-0.289594	-1.35725
b3200	lptA	chr	+	3341401,	3341959,	0.0805353	0.138571	0.253694	-0.295058	0.0155877	0.00489492	-0.0125827	-0.610087	0.0342568	0.166675	-0.112774	-0.233351
b3209	elbB	chr	-	3347827,	3348481,	1.415	1.12501	1.23762	1.15735	1.2899	0.935632	1.05582	1.09165	0.821256	1.23508	1.16551	1.02998
b3210	arcB	chr	-	3348710,	3351047,	-0.893573	-0.860297	-1.14134	-1.38621	-1.50072	-1.30984	-1.46226	-1.0821	-2.05885	-0.977102	-1.42657	-1.45701
b3212	gltB	chr	+	3352653,	3357207,	-0.474032	-0.153871	-0.416808	-0.613603	-0.764522	-0.446238	-0.70568	-0.420558	-0.85794	-0.350194	-0.653357	-0.663072
b4472	yhdP	chr	-	3390479,	3394280,	-2.89385	-2.89959	-2.82726	-3.31733	-3.13515	-3.32423	-3.88887	-3.62972	-3.80274	-2.86703	-3.23899	-3.75539
b3248	yhdE	chr	-	3395806,	3396400,	-1.84154	-2.1013	-2.1888	-2.39329	-2.06814	-2.19916	-2.63441	-2.42496	-3.03982	-2.07301	-2.22028	-2.61522
b3290	trkA	chr	+	3434539,	3435916,	-0.0707378	-0.0760753	-0.127454	-0.286125	-0.0278273	-0.075595	-0.485382	-0.750204	-0.297434	-0.0903523	-0.126219	-0.537546
b3294	rplQ	chr	-	3437637,	3438021,	0.60505	0.484796	0.470063	0.341665	0.399388	0.341054	-0.12701	-0.105028	-0.270871	0.508713	0.365616	-0.142698
b3299	rpmJ	chr	-	3440639,	3440756,	0.90237	1.05921	1.05399	0.139556	0.197542	0.651333	-0.0610558	-0.339929	-0.209634	1.00251	0.25393	-0.21254
b3311	rpsQ	chr	-	3446335,	3446590,	-1.22206	-1.28982	-1.25924	-1.69882	-1.54386	-1.65371	-2.27818	-2.13252	-2.10387	-1.26184	-1.61804	-2.2024
b3349	slyD	chr	-	3475928,	3476519,	0.0169298	0.0636276	-0.00578605	-0.087698	-0.0619953	-0.163341	-0.669391	-0.510273	-0.783417	0.0223038	-0.0830338	-0.627186
b3352	yheS	chr	+	3479310,	3481224,	-0.210174	-0.443418	-0.3645	-0.555151	-0.645227	-0.578941	-1.23909	-0.825922	-1.4463	-0.351091	-0.60157	-1.12699
b3353	yheT	chr	+	3481223,	3482246,	-1.1506	-1.69496	-0.416212	-1.13366	-1.68426	-1.1285	-1.69807	-1.52376	-1.68446	-1.12716	-1.40207	-1.70194
b3384	trpS	chr	-	3510655,	3511660,	0.419847	0.624891	0.450846	0.469758	0.507677	0.357183	0.142835	0.13248	0.108668	0.499604	0.466293	0.13811
b3388	damX	chr	-	3514041,	3515328,	-0.240291	-0.134858	-0.268189	-0.467957	-0.303509	-0.438021	-0.819805	-0.893165	-0.889075	-0.215577	-0.387767	-0.876197
b3389	aroB	chr	-	3515419,	3516508,	-1.40242	-1.37803	-1.42765	-1.44739	-1.62048	-1.67814	-2.04498	-1.93244	-2.13533	-1.40152	-1.56389	-2.02838
b3407	yhgF	chr	+	3535406,	3537728,	0.811207	0.798932	0.847107	0.783387	0.712561	0.687395	0.525115	0.595717	-0.0573872	0.81395	0.72703	0.453061
b3409	feoB	chr	+	3538428,	3540750,	0.363791	0.645316	0.122624	0.0434379	0.192154	-0.017062	-0.808688	-0.615187	-1.20912	0.357092	0.09427	-0.829428
b3414	gntY	chr	+	3543645,	3544221,	1.16057	0.960803	1.22878	1.22889	1.26883	1.31392	1.84848	1.93855	2.07994	1.12453	1.26749	1.91662
b3423	glpR	chr	-	3557869,	3558628,	-0.589447	-1.05291	-0.280898	-0.562811	-0.326343	-0.161044	-0.193155	-0.4009	-0.443779	-0.659187	-0.385348	-0.302911
b3438	gntR	chr	-	3575753,	3576749,	-1.0428	-1.26885	-0.889834	-1.52834	-1.34101	-1.13712	-1.4733	-1.27835	-1.26065	-1.05784	-1.36105	-1.3193
b3462	ftsX	chr	-	3599050,	3600109,	-1.08686	-0.890034	-1.12645	-1.016	-0.877015	-1.24334	-1.11913	-1.00072	-1.51647	-1.04902	-1.00359	-1.16046
b3469	zntA	chr	+	3604473,	3606672,	0.376664	0.475465	0.142965	-0.0571417	-0.422606	-0.254933	-0.3872	-0.279062	-0.508818	0.299706	-0.261266	-0.364952
b3472	dcrB	chr	+	3607977,	3608535,	0.365088	0.0665823	0.000604941	-0.334546	0.0751191	0.0717134	0.0994973	-0.0817225	-0.371447	0.113191	-0.0934992	-0.0363383
b3500	gor	chr	+	3644321,	3645674,	0.962505	0.973415	1.09984	0.794776	0.932994	0.829402	0.882136	0.637786	0.942816	1.01972	0.857843	0.825115
b3551	bisC	chr	-	3712083,	3714417,	-0.919018	-1.17577	-0.842449	-1.18598	-1.24432	-1.2801	-1.57006	-1.47744	-1.27264	-0.984579	-1.23036	-1.52102
b3570	bax	chr	-	3734375,	3735200,	-3.0928	-3.04121	-3.10465	-3.12304	-3.19127	-2.76926	-2.37169	-2.40839	-2.5125	-3.06868	-3.09677	-2.42628
b3574	yiaJ	chr	-	3739706,	3740555,	-1.51977	-2.21477	-1.81376	-1.3718	-1.5357	-1.2271	-1.25616	-1.22174	-0.896865	-1.89819	-1.42308	-1.20882
b3590	selB	chr	-	3756039,	3757884,	-0.573686	-0.608742	-0.568054	-0.667763	-0.580597	-0.511827	-0.982862	-0.962227	-0.663048	-0.590485	-0.598895	-0.917519
b3591	selA	chr	-	3757880,	3759272,	-0.360444	-0.366574	0.519018	-0.41199	-0.547179	-0.590437	-1.29798	-0.688881	-1.11038	-0.0783489	-0.489176	-1.0451
b3605	lldD	chr	+	3777849,	3779040,	-2.18942	-2.004	-1.68113	-1.87692	-1.75923	-1.77042	3.4304	3.59954	2.77838	-1.94466	-1.80133	3.35902
b3610	grxC	chr	-	3782213,	3782465,	0.482244	0.795918	0.673855	0.334086	0.474305	0.733139	0.693568	0.298012	0.29109	0.655694	0.458116	0.476047
b3611	yibN	chr	-	3782606,	3783038,	-0.0257174	-0.0906747	-0.018876	-0.460125	-0.409503	-0.29622	-0.530724	-0.648743	-0.27774	-0.041145	-0.405494	-0.55679
b3613	envC	chr	+	3784860,	3786120,	-2.51086	-3.0504	-2.9004	-2.63203	-3.10127	-2.89815	-3.73239	-3.238	-4.14131	-2.88002	-2.89998	-3.6598
b3616	tdh	chr	-	3788342,	3789368,	0.658714	0.522046	0.461277	0.856364	0.485387	0.713643	1.26149	1.52249	1.21808	0.530536	0.660479	1.34328
b3622	rfaL	chr	+	3794970,	3796230,	-0.552313	-0.487338	-0.618089	-0.73223	-0.911633	-0.492605	-1.03003	-1.5529	-0.53404	-0.560456	-0.779523	-1.17492
b3624	rfaZ	chr	-	3797367,	3798219,	-1.1506	-0.876248	-0.804978	-0.901206	-1.20617	-0.616909	-1.12806	-0.606419	0.0106883	-0.920325	-0.996617	-0.808062
b3625	rfaY	chr	-	3798289,	3798988,	-0.417885	-0.749903	-0.952988	-0.753649	-0.702445	-0.590437	-0.657169	-1.65982	0.490041	-0.742669	-0.706592	-0.968567
b3626	rfaJ	chr	-	3799005,	3800022,	-1.19703	-1.07752	-1.52241	-1.11934	-0.899452	-1.40928	-1.44237	-1.08724	-0.432918	-1.27894	-1.06151	-1.22222
b3629	rfaS	chr	-	3802203,	3803139,	-2.84207	-3.17671	-2.68569	-2.26732	-2.86918	-2.3123	-2.96936	-2.74728	0.341078	-2.89101	-2.57199	-2.47838
b3644	yicC	chr	+	3814698,	3815562,	-0.0836163	0.440298	-0.119608	0.197982	-0.0189702	0.636072	0.315267	0.432911	0.0788426	0.0638924	0.170109	0.332695
b3646	yicG	chr	+	3816896,	3817514,	-0.829037	-0.889401	-0.629569	-0.92848	-0.350208	-0.270819	0.185407	-0.491502	-0.452284	-0.775879	-0.576826	-0.192137
b3653	gltS	chr	-	3825482,	3826688,	0.364966	0.359269	0.689101	-0.561246	0.0753812	-0.47678	-0.556903	-0.445147	-1.04435	0.487557	-0.285317	-0.601465
b3660	yicL	chr	+	3836270,	3837194,	0.081481	-0.125792	-0.411193	-0.162534	-0.417192	-0.181181	-0.590403	0.0547795	-0.791372	-0.209491	-0.286724	-0.461196
b3666	uhpT	chr	-	3843798,	3845190,	-0.469192	-0.875613	-0.574091	-0.778062	-1.0921	-1.06437	-2.25205	-2.01773	-1.92993	-0.669726	-0.967074	-2.11274
b3673	emrD	chr	+	3851944,	3853129,	-1.51437	-1.47764	-1.42663	-1.71895	-1.64443	-1.53003	-2.23681	-2.05739	-2.72063	-1.47167	-1.66083	-2.28475
b3724	phoU	chr	-	3904875,	3905601,	-0.522956	-0.625492	-0.342714	-0.617921	-0.428561	-0.612493	-1.00419	-0.891045	-1.30087	-0.502411	-0.526492	-1.01376
b3732	atpD	chr	-	3914015,	3915398,	0.312161	0.260797	0.298939	0.844593	0.958371	0.68504	0.895885	0.919973	0.816919	0.288406	0.871431	0.891281
b3735	atpH	chr	-	3917892,	3918426,	-1.0534	-0.990397	-1.03445	-0.786911	-0.864575	-0.876741	-0.817819	-0.781663	-0.916035	-1.02324	-0.840724	-0.816733
b3739	atpI	chr	-	3920082,	3920463,	-4.70916	-4.54267	-4.75375	-6.27952	-5.99402	-5.8859	-6.44144	-6.28682	-6.45589	-4.66526	-6.06925	-6.37057
b3746	ravA	chr	-	3927619,	3929116,	0.384751	0.502956	-0.228547	-0.54858	-0.609083	-0.930512	-0.769606	-1.20825	-1.40435	0.127114	-0.674853	-1.05308
b3764	yifE	chr	+	3946108,	3946447,	-2.00873	-1.9734	-1.91678	-0.965924	-1.0229	-0.943868	-0.887158	-0.949392	-0.803467	-1.96616	-0.990992	-0.899627
b3775	ppiC	chr	-	3957554,	3957836,	-0.293079	0.0803748	0.135899	0.0319645	0.055593	-0.211409	-0.318625	-0.25816	-0.416524	-0.0037666	-0.0322171	-0.318437
b3779	gpp	chr	-	3960767,	3962252,	-1.56558	-1.62814	-1.80777	-1.82473	-1.83195	-2.02589	-2.25068	-2.02675	-2.43795	-1.68277	-1.85811	-2.2058
b3781	trxA	chr	+	3963783,	3964113,	-1.18024	-0.993541	-1.19006	-1.37308	-1.41778	-1.19876	-1.67551	-1.69634	-1.80866	-1.12055	-1.36691	-1.71272
b3784	rfe	chr	+	3965938,	3967042,	-0.631652	-0.546508	-0.638849	-0.976486	-0.820247	-0.872655	-1.30575	-1.37857	-0.845967	-0.610946	-0.888672	-1.25042
b3792	wzxE	chr	+	3974300,	3975551,	-2.04704	-2.06959	-2.1453	-2.56076	-2.46398	-1.36922	-2.91466	-2.45979	-3.02841	-2.10452	-2.32727	-2.75732
b3793	wzyE	chr	+	3976623,	3977976,	-2.25607	-1.46427	-1.81576	-1.79874	-1.85603	-1.96483	-2.5668	-2.26715	-3.00243	-1.8653	-1.85746	-2.57476
b3811	xerC	chr	+	3994309,	3995206,	-0.999931	-0.585503	-1.22098	-1.23883	-1.62459	-1.18367	-1.08979	-1.43933	-2.01264	-0.967413	-1.415	-1.38488
b3812	yigB	chr	+	3995205,	3995922,	0.204514	-0.396717	-0.115091	0.217988	-0.0885392	-0.250781	0.424481	0.147226	-0.391352	-0.161467	-0.0228719	0.199317
b3825	pldB	chr	+	4007192,	4008215,	-1.97864	-2.20318	-2.20912	-2.81461	-1.99781	-2.97126	-2.80229	-2.33888	-3.2968	-2.15389	-2.47246	-2.75382
b3831	udp	chr	+	4014453,	4015215,	1.113	0.805352	0.844938	1.0893	1.22654	0.905408	1.85077	1.70227	1.56723	0.888766	1.12732	1.7528
b3838	tatB	chr	+	4020240,	4020756,	-1.6759	-1.39813	-1.55337	-1.62249	-1.84811	-1.37079	-2.5431	-2.73268	-2.73337	-1.52778	-1.6858	-2.6065
b4483	tatD	chr	+	4021576,	4022359,	-0.503719	-0.988322	-0.325047	-0.839379	-0.964862	-0.241246	-1.2708	-0.867218	-0.90685	-0.640071	-0.791481	-1.13776
b3847	pepQ	chr	+	4029183,	4030515,	0.440823	0.466119	0.434218	1.18857	0.918056	0.916267	1.17439	1.48071	1.55431	0.4488	1.01445	1.31682
b3870	glnA	chr	-	4054647,	4056057,	1.47866	1.47544	1.36193	1.80944	1.75816	1.83688	1.94798	2.06775	1.96434	1.43442	1.7916	1.99376
b3891	fdhE	chr	-	4078321,	4079251,	-0.645447	-0.692612	-0.638514	0.0631977	-0.170166	0.246834	0.283052	0.370421	0.42127	-0.665716	-0.0145782	0.331046
b3892	fdoI	chr	-	4079247,	4079883,	-0.901446	-0.833602	-0.8527	-0.0334927	-0.0704258	-0.21269	0.961375	0.682411	0.647613	-0.862965	-0.0868046	0.81557
b3893	fdoH	chr	-	4079879,	4080782,	-1.48639	-1.41499	-1.36932	-0.574106	-0.468307	-0.378541	0.295459	0.192283	0.159498	-1.42047	-0.492644	0.238379
b3894	fdoG	chr	-	4080794,	4083845,	-1.08157	-1.08524	-1.1792	-0.972129	-0.863603	-0.953803	-0.0698891	0.0592987	-0.279026	-1.11629	-0.919322	-0.0667837
b3895	fdhD	chr	+	4084038,	4084872,	-1.54999	-1.45968	-1.29666	-0.749303	-0.7271	-0.888518	-1.02497	-1.07075	0.0421665	-1.4213	-0.748935	-0.841325
b3915	fieF	chr	+	4104491,	4105394,	-2.11808	-2.09779	-2.2969	-2.0353	-2.36447	-2.60124	-2.82051	-2.53018	-2.80301	-2.19401	-2.29257	-2.67866
b3918	cdh	chr	+	4107952,	4108708,	-0.567445	-0.376517	0.21277	-0.0252451	0.0245007	0.284782	-0.135837	0.0637683	1.26974	-0.234992	0.0542878	0.136636
b3919	tpiA	chr	-	4108762,	4109530,	1.12379	1.05627	0.994941	0.830206	0.827813	0.899106	0.637902	0.734847	0.660768	1.04873	0.841148	0.672681
b3928	yiiU	chr	+	4116537,	4116783,	-0.313599	-0.561993	-0.329377	-0.384813	-0.418246	-0.385349	0.571664	0.609368	0.733636	-0.406304	-0.406595	0.599877
b3929	rraA	chr	-	4116867,	4117353,	-2.13952	-2.21898	-2.12548	-2.0345	-2.16037	-2.40606	-2.54121	-2.35665	-2.38709	-2.15157	-2.15509	-2.42511
b3933	ftsN	chr	-	4120402,	4121362,	-1.06244	-0.9713	-1.09511	-1.36328	-1.63787	-1.06437	-1.39109	-1.75489	-1.91463	-1.02979	-1.44212	-1.59294
b3940	metL	chr	+	4127857,	4130290,	-1.80488	-1.67767	-1.45449	-1.64275	-1.92243	-1.86244	-1.95484	-2.00344	-2.2662	-1.63882	-1.81308	-2.0014
b3960	argH	chr	+	4154872,	4156246,	-0.629204	-0.604331	0.182758	-0.407268	-0.502102	-0.74244	0.193868	-0.794279	-1.13426	-0.355641	-0.48751	-0.477164
b3961	oxyR	chr	+	4156512,	4157430,	0.0240037	0.151955	0.328475	-0.0252451	-0.0759549	-0.547183	-0.206743	-0.517454	-0.242235	0.183899	-0.156593	-0.334829
b3966	btuB	chr	+	4161661,	4163506,	-0.0613706	0.229109	-0.0578902	-0.152071	-0.404226	-0.0913348	-0.688416	-0.681144	-0.465623	0.0406767	-0.259857	-0.65073
b3974	coaA	chr	-	4172098,	4173049,	-0.224622	-0.759455	-0.509134	-0.155524	-0.0227311	-0.535673	0.0517929	0.403747	1.6409	-0.509841	-0.182355	0.336195
b3981	secE	chr	+	4175380,	4175764,	-0.143624	0.0106136	-0.110852	-0.222398	-0.0497863	-0.341013	-1.0688	-1.14487	-1.46667	-0.0736293	-0.164963	-1.15183
b3983	rplK	chr	+	4176469,	4176898,	1.10049	1.14516	1.0141	1.0456	0.979597	1.14838	0.840023	0.852681	0.64605	1.08789	1.0299	0.809959
b3986	rplL	chr	+	4178582,	4178948,	1.15412	1.14355	1.15343	1.04042	0.993861	1.18004	-0.0116755	-0.167757	-0.0543596	1.15384	1.04114	-0.0821263
b3988	rpoC	chr	+	4183372,	4187596,	0.234197	0.189786	0.257755	-0.108854	-0.0926485	-0.112928	-0.837262	-0.849798	-0.878442	0.227766	-0.103397	-0.850209
b4001	yjaH	chr	+	4198588,	4199284,	0.286646	0.906729	-0.0978785	-1.17687	-1.04545	-1.04052	-1.97606	-2.32709	-2.51092	0.287221	-1.11587	-2.23684
b4018	iclR	chr	-	4220826,	4221651,	-1.88937	-2.38357	-2.25091	-2.27404	-2.15859	-2.27493	-2.7247	-2.26715	-2.31637	-2.20452	-2.1998	-2.50499
b4024	lysC	chr	-	4229906,	4231256,	0.363014	0.563429	-0.312733	-1.24074	-1.03392	-0.88749	-1.42545	-0.190333	-1.79723	0.13226	-1.08638	-1.0329
b4041	plsB	chr	-	4252065,	4254489,	-0.96231	-0.697704	-0.615911	-0.710563	-0.877147	-0.775582	-1.14754	-1.41872	-1.45793	-0.743424	-0.800743	-1.30106
b4043	lexA	chr	+	4255137,	4255746,	-1.08801	-1.41355	-1.36706	-1.09013	-1.11775	-1.31868	-0.794204	-0.900607	-0.951103	-1.32758	-1.13922	-0.879145
b4129	lysU	chr	-	4351222,	4352740,	1.52296	1.41308	1.15415	1.23836	1.051	1.12268	0.951867	0.891976	1.30612	1.3326	1.12943	0.975995
b4136	dipZ	chr	-	4361367,	4363065,	0.499295	0.257298	-0.130903	-0.126392	0.266906	-0.360569	-0.364703	-0.324884	-0.0242065	0.144015	-0.0119693	-0.291217
b4169	amiB	chr	+	4394087,	4395425,	-2.58023	-2.6299	-2.3214	-2.78478	-2.57461	-2.7227	-2.85126	-2.99348	-2.6776	-2.51581	-2.68893	-2.82617
b4170	mutL	chr	+	4395434,	4397282,	-3.03031	-2.71601	-2.49012	-3.24642	-3.2255	-3.12182	-3.61803	-3.2522	-3.66766	-2.73913	-3.2055	-3.49606
b4172	hfq	chr	+	4398310,	4398619,	-0.266597	-0.110991	-0.229819	-0.347663	-0.57001	-0.207139	-0.444048	-0.589077	-0.388555	-0.204634	-0.432135	-0.488107
b4175	hflC	chr	+	4401322,	4402327,	-0.413576	-0.58342	-0.585535	-0.897795	-0.970226	-0.825204	-0.76229	-0.944108	-1.00263	-0.550967	-0.920304	-0.864508
b4180	rlmB	chr	+	4407297,	4408029,	0.585166	0.725428	0.339171	0.759826	0.56993	0.164878	0.0776151	0.490599	0.180613	0.521248	0.551595	0.169353
b4207	fklB	chr	+	4426957,	4427578,	1.71552	1.22333	1.37307	1.12516	1.31811	1.61525	1.3606	1.12385	1.06625	1.40261	1.2951	1.21254
b4218	ytfL	chr	-	4437894,	4439238,	-0.946858	-1.30187	-1.32838	-1.45209	-1.44789	-1.555	-2.14227	-2.63941	-2.07677	-1.22048	-1.45888	-2.31151
b4222	ytfP	chr	+	4445916,	4446258,	-2.50366	-2.6152	-2.46218	-2.53397	-2.75764	-2.48887	-2.65857	-2.50782	-2.86046	-2.52304	-2.63123	-2.64839
b4233	mpl	chr	+	4453807,	4455181,	-0.060649	-0.0234294	-0.234813	-0.163814	-0.270534	-0.433733	-0.48096	-0.610747	-0.859345	-0.129193	-0.256565	-0.587368
b4238	nrdD	chr	-	4458544,	4460683,	0.66968	0.419647	0.423764	-0.136749	-0.010867	-0.0744214	-0.555481	-0.445256	-0.439141	0.482316	-0.0755773	-0.511481
b4242	mgtA	chr	+	4465647,	4468344,	-0.0150117	-0.00307508	0.0400721	-0.542181	-0.591464	-0.297148	-1.54593	-1.69946	-1.65751	0.0121025	-0.52479	-1.61232
b4243	yjgF	chr	-	4468549,	4468936,	0.853262	0.589989	0.682355	1.48063	1.16662	1.53264	1.65611	1.19516	1.54177	0.691582	1.34366	1.45469
b4255	rraB	chr	+	4476495,	4476912,	0.0825778	0.058948	-0.228494	-0.0503387	0.148042	0.100692	0.206359	0.266054	0.0395694	-0.0555072	0.0696211	0.215942
b4259	holC	chr	-	4481859,	4482303,	-2.17788	-1.5597	-1.99812	-2.92441	-2.64277	-2.58222	-2.73768	-2.67105	-3.0393	-1.91841	-2.74428	-2.79801
b4261	yjgP	chr	+	4484240,	4485341,	-0.883114	-0.766181	-1.06426	-0.878843	-0.840442	-1.2079	-1.58213	-1.29122	-1.54585	-0.921648	-0.927422	-1.4829
b4262	yjgQ	chr	+	4485340,	4486423,	-2.14869	-2.27901	-2.2502	-2.20183	-2.44446	-2.83629	-2.47566	-2.48884	-3.11222	-2.2305	-2.43012	-2.62791
b4263	yjgR	chr	-	4486583,	4488086,	-0.111164	-0.96863	-0.675988	-0.739843	-1.03963	-0.888518	-1.22117	-0.360258	-1.23547	-0.647382	-0.912568	-0.977987
b4349	hsdM	chr	-	4579481,	4581071,	1.19479	0.94612	1.68351	1.04554	0.833678	1.41197	0.950928	1.01076	0.779824	1.27076	1.00686	0.960148
b4359	mdoB	chr	-	4595172,	4597464,	-1.92579	-1.83861	-1.94035	-2.35468	-2.32592	-2.41045	-2.73739	-2.69964	-2.65171	-1.91272	-2.35613	-2.72406
b4360	yjjA	chr	-	4597717,	4598212,	-0.306415	-0.32808	0.361005	0.238624	0.0819323	-0.752424	-0.770738	-0.448795	-0.522186	-0.0948114	-0.0603323	-0.644641
b4383	deoB	chr	+	4617625,	4618849,	1.05421	0.976443	0.795986	1.15585	1.00489	1.1162	1.11377	1.04523	1.17535	0.922355	1.07612	1.10899
b4401	arcA	chr	-	4637612,	4638329,	-0.114602	-0.0820867	0.1832	-0.524635	-0.542258	-0.449191	-0.604913	-0.738822	-0.774014	0.011118	-0.517678	-0.681917

## Sheet: (WT, C) < M
# Note: These are taken only from the case where both comparisons are significant						Replicates Separate									Replicates Combined									Fold Change
Name	Name2	Chr	Strand	Start	End	WT_1	WT_2	WT_3	M_1	M_2	M_3	C_1	C_2	C_3	WT_(1,2,3)	M_(1,2,3)	C_(1,2,3)	WT/M p-value	WT/M BH q-value	C/M p-value	C/M BH q-value	WT – M	C – M	WT/ M	C / M
b0023	rpsT	chr	-	20814	21078	-1.69745	-1.67635	-1.73449	-1.08499	-1.07158	-0.752693	-2.045	-2.20178	-2.04729	-1.70152	-1.02394	-2.11208	0.0192227	0.0423411	0.00308215	0.0130379	-0.677579	-1.08814	0.625213	0.470366
b0058	rluA	chr	-	59686	60346	-2.61328	-2.1477	-2.42749	-1.68738	-1.30402	-1.20002	-2.79875	-2.90869	-2.58161	-2.38102	-1.43998	-2.77519	0.00777013	0.0226857	0.00275663	0.012296	-0.941044	-1.33521	0.520856	0.396334
b0059	hepA	chr	-	60357	63264	0.776393	0.627729	0.538678	2.18961	2.462	2.10428	-0.250567	-0.00117686	-0.221782	0.61793	2.28704	-0.165113	0.000570783	0.00524536	0.000103777	0.00185266	-1.66911	-2.45215	0.314447	0.182738
b0113	pdhR	chr	+	122091	122856	-2.63495	-2.79542	-2.57999	0.184468	-0.794489	-0.135921	-1.98908	-2.21041	-2.21328	-2.66101	-0.370981	-2.12922	0.0108891	0.0286614	0.0174427	0.0391148	-2.29003	-1.75823	0.204471	0.29561
b0114	aceE	chr	+	123016	125680	1.59446	1.7287	1.70246	2.46123	2.39861	2.38529	0.395107	0.300404	0.212615	1.68222	2.41827	0.329141	0.000411333	0.00456942	8.59215e-05	0.00172888	-0.736048	-2.08913	0.600382	0.235023
b0125	hpt	chr	+	141430	141967	0.316816	0.40572	0.587118	1.27471	1.30372	1.41349	0.580638	0.604243	0.506073	0.448384	1.31365	0.5823	0.00203831	0.009759	0.000239525	0.00304832	-0.865269	-0.731353	0.548944	0.602339
b0154	hemL	chr	-	173601	174882	0.732728	0.525842	0.935843	1.68659	1.67605	1.77205	0.747642	0.681768	0.450001	0.73234	1.69624	0.680556	0.0104771	0.028008	0.00351476	0.0142566	-0.963905	-1.01569	0.512668	0.494592
b0169	rpsB	chr	+	189873	190599	0.95633	0.904906	0.98633	1.16159	1.0839	1.15665	0.256063	0.348993	0.283436	0.954096	1.12602	0.291088	0.00595385	0.0187427	2.49286e-05	0.000962096	-0.171919	-0.834927	0.887661	0.560612
b0170	tsf	chr	+	190856	191708	0.474715	0.500424	0.494942	1.29677	1.36924	1.35247	0.433555	0.399534	0.562227	0.492206	1.34076	0.440966	0.000177468	0.00313669	0.000828329	0.0057101	-0.848553	-0.899794	0.555341	0.535963
b0171	pyrH	chr	+	191854	192580	0.950454	0.795669	1.09106	2.3011	1.98901	1.8923	1.06137	1.03958	0.991402	0.944005	2.08344	1.04105	0.00273939	0.0117598	0.0122434	0.0305879	-1.13943	-1.04239	0.453938	0.485524
b0180	fabZ	chr	+	202100	202556	0.969441	0.906654	0.857264	1.66489	1.77544	1.7434	0.552293	0.332397	0.381166	0.899955	1.72431	0.447801	6.0058e-05	0.00195517	0.000473807	0.00435493	-0.824353	-1.27651	0.564736	0.412794
b0182	lpxB	chr	+	203347	204496	-2.89508	-2.786	-2.88412	-2.12899	-1.92164	-1.77765	-2.95977	-3.04803	-2.71317	-2.832	-1.97815	-2.96407	0.00707457	0.0211527	0.0025217	0.0118076	-0.853846	-0.985912	0.553308	0.504907
b0194	proS	chr	-	217056	218775	-0.153658	-0.194498	-0.16731	0.509185	0.760548	0.536438	-0.498422	-0.289529	-0.50598	-0.170623	0.624507	-0.428947	0.00920488	0.0256668	0.000677005	0.00506721	-0.795131	-1.05345	0.576291	0.481813
b0211	mltD	chr	-	232596	233955	-2.56499	-2.57632	-2.60303	-2.01264	-1.93279	-1.92485	-3.31768	-3.23204	-3.34742	-2.5848	-1.95996	-3.28071	0.000550535	0.00524078	1.0589e-05	0.000606426	-0.624838	-1.32075	0.648493	0.400327
b0238	gpt	chr	+	255976	256435	1.38257	1.14562	1.5819	2.97881	2.9051	2.76259	0.831723	1.12067	1.1426	1.36233	2.89795	0.971336	0.00186814	0.00924141	0.000285811	0.00324765	-1.53561	-1.92661	0.344933	0.263046
b0337	codA	chr	+	355394	356678	1.05757	1.63008	1.37857	2.70114	2.42156	2.21943	0.850163	0.633047	0.448094	1.36571	2.47749	0.717852	0.0078464	0.0228189	0.000678883	0.00506721	-1.11178	-1.75964	0.462723	0.295322
b0405	queA	chr	+	424234	425305	-0.543687	-0.807764	-0.544945	0.71763	0.450948	0.270701	-0.141945	-0.221322	-0.462931	-0.646671	0.497081	-0.200291	0.0033529	0.0133132	0.0115256	0.0297429	-1.14375	-0.697371	0.452581	0.616695
b0406	tgt	chr	+	425360	426488	-1.4597	-1.17377	-1.27304	-0.710262	-0.958984	-0.795501	-1.45893	-1.20241	-1.24984	-1.28945	-0.840824	-1.32315	0.0129225	0.0320778	0.0110598	0.0290387	-0.448623	-0.482329	0.732742	0.715821
b0415	ribE	chr	+	433870	434341	0.0689455	0.134153	0.0298468	1.76313	1.46365	1.54159	0.509048	0.510563	0.0495612	0.0702223	1.58119	0.427474	0.00153407	0.00824631	0.00484088	0.017046	-1.51096	-1.15371	0.350877	0.449467
b0423	thiI	chr	+	440772	442221	-0.349853	-0.170915	-0.352478	0.947423	0.967895	0.493009	-0.536584	-0.333261	-0.684457	-0.288603	0.850653	-0.48203	0.0111092	0.0289189	0.00351208	0.0142566	-1.13926	-1.33268	0.453994	0.397029
b0433	ampG	chr	-	451293	452769	-2.54751	-2.72071	-2.43578	-2.14746	-1.68036	-1.78335	-2.38479	-2.87122	-2.60144	-2.57803	-1.87408	-2.6144	0.0206294	0.0446992	0.0199525	0.042766	-0.703945	-0.740324	0.613891	0.598605
b0436	tig	chr	+	454356	455655	0.506639	0.455472	0.492436	1.09872	1.10949	0.996855	0.556448	0.572618	0.588724	0.484571	1.08715	0.570252	0.0011252	0.00689473	0.00332282	0.0137055	-0.602584	-0.516902	0.658574	0.698871
b0444	queC	chr	-	464075	464771	0.200382	0.364172	0.288179	0.716829	0.586171	0.587709	0.0446746	0.0676036	0.149294	0.294	0.637829	0.0647135	0.00584339	0.0186221	0.00082452	0.0057101	-0.343829	-0.573115	0.787947	0.672164
b0465	kefA	chr	+	485759	489122	-1.34929	-1.35171	-1.4464	-1.13915	-1.08183	-1.06822	-1.77017	-1.95923	-1.82693	-1.38676	-1.10429	-1.88019	0.00288526	0.0121019	0.00216344	0.0110784	-0.282475	-0.775907	0.822179	0.584021
b0469	apt	chr	+	490635	491187	0.520823	0.472321	0.849281	1.76619	1.57825	1.46279	-0.420813	-0.435516	-0.74256	0.624482	1.62588	-0.474885	0.0034127	0.0135146	0.000119943	0.00205281	-1.0014	-2.10077	0.499514	0.233134
b0472	recR	chr	+	493628	494234	-2.66262	-2.5824	-2.85132	-1.92158	-1.79684	-2.19229	-2.94879	-2.65127	-3.17253	-2.69511	-1.91775	-2.89471	0.00935755	0.0258289	0.00879107	0.024807	-0.777364	-0.97696	0.583432	0.508049
b0477	gsk	chr	+	499348	500653	-0.212005	-0.0206826	-0.380465	1.65364	1.85836	1.7229	0.27633	0.338934	0.115683	-0.211797	1.75899	0.275942	0.000347515	0.00423267	7.9847e-05	0.00162866	-1.97079	-1.48305	0.255114	0.357733
b0522	purK	chr	-	550749	551817	-0.627805	-1.15287	-0.56431	1.25212	1.2529	0.786489	-0.30703	0.134214	-0.480924	-0.808951	1.16426	-0.223603	0.00170917	0.00880605	0.00583357	0.0191164	-1.97321	-1.38787	0.254685	0.38213
b0526	cysS	chr	+	553833	555219	-0.138716	-0.239103	-0.270188	0.164717	0.433321	0.264756	-0.373669	-0.365107	-0.402935	-0.225049	0.306104	-0.37856	0.0109125	0.0286614	0.0121212	0.0304225	-0.531153	-0.684664	0.692001	0.622151
b0529	folD	chr	-	556097	556964	0.896668	1.13833	0.59667	1.68783	1.90363	1.8581	0.656211	0.464002	0.298265	0.832114	1.8122	0.515316	0.015567	0.0366181	0.000918194	0.00610353	-0.980089	-1.29689	0.506949	0.407004
b0576	pheP	chr	+	601181	602558	-1.38187	-1.53571	-1.21078	-0.931427	-0.451594	-0.73506	-1.66	-1.61198	-1.43292	-1.37296	-0.701324	-1.6051	0.0210106	0.0452093	0.0123184	0.0306619	-0.671632	-0.903775	0.627796	0.534486
b0627	tatE	chr	+	658169	658373	-1.35625	-1.6619	-1.43783	-0.926256	-0.693855	-0.85975	-1.25651	-1.10676	-1.24085	-1.4863	-0.808969	-1.219	0.0056301	0.0181274	0.0145375	0.0346342	-0.67733	-0.410026	0.625322	0.75261
b0630	lipB	chr	-	660859	661501	0.144003	0.356527	0.207437	1.30689	1.49287	1.66657	0.0802114	-0.137866	0.195766	0.238579	1.44287	0.0469764	0.00127654	0.00742485	0.000547908	0.0045769	-1.20429	-1.39589	0.433983	0.380009
b0632	dacA	chr	-	661974	663186	0.664451	0.571007	0.630142	1.64819	1.27016	1.71157	0.801294	0.438992	0.588935	0.620598	1.47919	0.637668	0.0184912	0.0410333	0.00694643	0.0210657	-0.858596	-0.841526	0.551489	0.558053
b0636	ybeA	chr	-	667470	667938	-1.7088	-1.83869	-1.24082	-0.313401	-0.0363093	-0.0326589	-1.36007	-1.66607	-1.93647	-1.59663	-0.14933	-1.57878	0.00563666	0.0181274	0.00345327	0.0141262	-1.4473	-1.42945	0.366707	0.371272
b0637	ybeB	chr	-	667941	668259	-0.467528	-0.688581	-0.486393	0.718432	0.760057	0.303783	-0.406497	-0.296693	-0.901516	-0.548579	0.656367	-0.465029	0.00659285	0.0202407	0.0100815	0.0270963	-1.20495	-1.1214	0.433786	0.459649
b0640	holA	chr	-	669796	670828	-2.55742	-2.74867	-2.71548	-2.07545	-2.15191	-2.10433	-2.5583	-2.55618	-2.62932	-2.69012	-2.11273	-2.57695	0.00538404	0.0175423	0.000141672	0.00224415	-0.577392	-0.464227	0.670174	0.72486
b0642	leuS	chr	-	671423	674006	1.27788	1.31116	1.37569	1.97067	1.99837	1.9729	1.24405	1.34187	1.17159	1.32556	1.98745	1.26544	0.000839701	0.00589771	0.00362675	0.0145168	-0.66189	-0.72201	0.63205	0.606252
b0661	miaB	chr	-	692753	694178	0.300475	0.356318	0.359417	1.38579	1.43534	1.45396	0.144959	0.0908223	-0.295985	0.341356	1.42534	0.0529384	2.71356e-06	0.000611074	0.00804886	0.0234507	-1.08399	-1.3724	0.471723	0.386247
b0680	glnS	chr	+	705315	706980	-0.16919	-0.210243	0.0457621	1.20908	1.12148	1.15341	0.654769	0.64833	0.556496	-0.105008	1.16142	0.638345	0.00186123	0.00923789	0.000241962	0.00305323	-1.26642	-0.523072	0.415689	0.695889
b0699	ybfA	chr	+	728356	728563	-3.15324	-3.30271	-3.48829	-1.71903	-1.62775	-1.28893	-2.81921	-2.85469	-2.72666	-3.32773	-1.6024	-2.79538	0.000621822	0.00531671	0.00689674	0.0210005	-1.72532	-1.19298	0.302431	0.4374
b0733	cydA	chr	+	770680	772249	1.43472	1.51223	1.35918	1.76501	1.71667	1.64047	-0.224839	-0.155013	-0.146527	1.43208	1.721	-0.18651	0.00976638	0.0264833	6.22579e-06	0.000502826	-0.288917	-1.90751	0.818516	0.266552
b0772	ybhC	chr	-	805220	806504	0.346246	0.457059	0.357218	0.808503	0.916338	0.866091	0.737948	0.676066	0.710266	0.392536	0.861154	0.714514	0.000575502	0.00524536	0.0200187	0.042766	-0.468618	-0.14664	0.722657	0.903352
b0814	ompX	chr	+	849672	850188	1.14761	1.15649	1.14737	1.51586	1.58089	1.75216	-0.0378827	-0.0583541	-0.0126988	1.14568	1.58802	-0.0457459	0.0219671	0.0464617	0.00132837	0.00791177	-0.44234	-1.63377	0.73594	0.322245
b0819	ybiS	chr	-	854046	854967	0.0174459	0.0898849	0.217806	1.54393	1.57123	1.49402	-0.352589	-0.164501	-0.271568	0.119106	1.53714	-0.264024	0.000478798	0.00498552	0.000179684	0.00254808	-1.41804	-1.80117	0.374221	0.286942
b0820	ybiT	chr	+	855185	856778	-0.417715	-0.208247	0.121481	0.763705	0.6056	0.409563	-0.239636	-0.356322	-0.713735	-0.150781	0.620166	-0.364624	0.0206535	0.0446992	0.00569174	0.0188447	-0.770947	-0.98479	0.586033	0.505299
b0835	yliG	chr	-	875932	877258	1.22969	0.754726	1.1345	3.52902	2.65474	2.74462	0.903811	1.36657	0.891316	1.02076	2.94247	1.05949	0.00839164	0.0238101	0.00791112	0.023234	-1.92171	-1.88297	0.263942	0.271125
b0841	ybjG	chr	-	882014	882611	-0.391397	-0.106868	-0.125722	1.16027	0.86781	0.778907	-0.592142	-0.828645	-0.533632	-0.194617	0.950748	-0.668798	0.00180536	0.0090511	0.000549358	0.0045769	-1.14537	-1.61955	0.452075	0.325438
b0842	cmr	chr	+	882895	884128	-1.38241	-1.592	-1.05563	-0.177052	0.157517	-0.0547817	-1.39109	-1.5582	-1.30419	-1.35296	-0.0102089	-1.37847	0.00380971	0.0141111	0.000497242	0.00448723	-1.34275	-1.36826	0.394269	0.387357
b0847	ybjL	chr	-	887356	889042	-1.41911	-1.18135	-1.3381	0.203574	-0.114882	-0.0894587	-1.36806	-1.29314	-1.78132	-1.30903	0.0103319	-1.42408	0.000837811	0.00589771	0.00218244	0.0110784	-1.31936	-1.43441	0.400713	0.369997
b0859	rumB	chr	+	897740	898868	-1.53484	-1.63012	-1.70337	-0.196072	-0.183365	-0.670704	-1.79548	-2.00294	-2.13567	-1.62384	-0.289266	-1.88381	0.010306	0.0276499	0.00215781	0.0110784	-1.33457	-1.59454	0.396509	0.331127
b0877	ybjX	chr	-	917350	918343	-0.154607	0.0333737	0.0330136	1.94943	2.16098	2.16396	0.250452	0.33499	0.57458	-0.025169	2.08164	0.32662	2.66758e-05	0.00136967	0.000247037	0.00306532	-2.10681	-1.75502	0.23216	0.296269
b0884	infA	chr	-	925447	925666	-1.7986	-1.65817	-1.66337	-0.50018	-0.488889	-0.500142	-1.67555	-1.62329	-1.22449	-1.70207	-0.492031	-1.57573	0.0013513	0.00770914	0.0192066	0.0419951	-1.21004	-1.0837	0.432256	0.471816
b0898	ycaD	chr	+	945093	946242	-2.43972	-2.60896	-2.36028	-0.4451	0.180921	-0.981906	-2.06095	-2.13231	-2.50996	-2.48897	-0.255364	-2.18119	0.0216176	0.0461817	0.0202404	0.0429928	-2.2336	-1.92583	0.212627	0.263189
b0903	pflB	chr	-	950494	952777	2.20665	2.19123	2.10727	2.60821	2.5381	2.5128	0.586822	0.516065	0.652479	2.1639	2.5575	0.567229	0.000815571	0.00589309	5.69007e-06	0.000502826	-0.393605	-1.99027	0.761225	0.251691
b0904	focA	chr	-	952831	953689	-0.578524	-0.694692	-0.844393	0.920819	1.09377	1.03115	-1.72601	-1.75577	-1.53762	-0.7286	1.01646	-1.71692	0.000135496	0.00269004	1.26484e-05	0.000639852	-1.74506	-2.73338	0.298321	0.150373
b0905	ycaO	chr	-	954094	955855	0.674253	0.811278	0.811537	1.89477	1.87009	1.79361	0.600638	0.813094	0.641506	0.775069	1.86342	0.682142	0.000105471	0.00241761	0.00069347	0.00506721	-1.08835	-1.18128	0.470299	0.440961
b0910	cmk	chr	+	960423	961107	-1.1205	-1.41342	-1.41032	-0.256093	-0.207345	-0.368044	-0.752139	-0.90942	-0.963325	-1.34625	-0.254035	-0.826031	0.00273314	0.0117598	0.00221638	0.0111493	-1.09221	-0.571996	0.469042	0.672685
b0911	rpsA	chr	+	961217	962891	-0.536577	-0.618577	-0.491447	1.04478	1.03776	0.938836	0.0274996	0.0928391	0.133408	-0.54311	1.02663	0.0685305	7.08463e-06	0.000635393	3.97581e-05	0.00123333	-1.56974	-0.958098	0.336869	0.514735
b0914	msbA	chr	+	965843	967592	-1.32356	-1.02096	-1.29761	-0.36883	-0.436175	-0.618524	-1.58099	-1.38247	-1.17694	-1.22631	-0.443745	-1.45645	0.0046049	0.0160955	0.00488015	0.017046	-0.782568	-1.01271	0.581331	0.495616
b0915	lpxK	chr	+	967588	968575	-2.70487	-2.5817	-2.38542	-1.94319	-1.74048	-2.05699	-3.42923	-3.22352	-3.33981	-2.55551	-1.88459	-3.29554	0.00801085	0.0230273	0.000516733	0.0045769	-0.670916	-1.41095	0.628108	0.376065
b0918	kdsB	chr	+	970074	970821	0.0762052	-0.393808	-0.329242	0.875728	0.469489	0.74673	-0.798752	-0.801816	-0.204235	-0.262701	0.660345	-0.736468	0.00947239	0.0259749	0.00879659	0.024807	-0.923045	-1.39681	0.527395	0.379767
b0923	mukE	chr	+	974871	975549	-0.12899	0.0284176	-0.083394	0.511696	0.627127	0.475682	-0.056194	0.102085	-0.0708546	-0.050805	0.552283	-0.00398236	0.000786959	0.0058009	0.00183984	0.0100718	-0.603088	-0.556265	0.658343	0.68006
b0930	asnS	chr	-	986807	988208	0.431221	0.447006	0.469276	1.10518	1.00223	1.02638	0.519638	0.517752	0.572651	0.453074	1.04718	0.537334	0.00103899	0.00652765	0.000536869	0.0045769	-0.594108	-0.509848	0.662454	0.702296
b0945	pyrD	chr	+	1003990	1005001	1.08278	1.23057	1.12319	3.12503	2.87069	3.02874	1.0107	0.645323	0.625975	1.14692	2.98581	0.798454	0.000125094	0.00257134	0.000374156	0.00371412	-1.83889	-2.18736	0.279536	0.219553
b0951	pqiB	chr	+	1012481	1014122	-0.708444	-0.706323	-1.0241	0.0384496	0.0398146	-0.338762	-1.30863	-1.18623	-0.98085	-0.829856	-0.0359554	-1.19307	0.0123329	0.0310197	0.00317205	0.0132674	-0.793901	-1.15712	0.576783	0.448407
b0954	fabA	chr	-	1015174	1015693	-0.192344	-0.168468	-0.19896	0.633351	0.646717	0.755574	-0.328253	-0.26652	-0.557936	-0.18862	0.662354	-0.349315	0.00122156	0.0072238	0.00242348	0.0116405	-0.850975	-1.01167	0.55441	0.495972
b0955	ycbZ	chr	-	1015761	1017522	-1.10652	-1.03009	-1.1963	0.0439583	-0.106417	-0.433475	-0.977995	-1.32463	-1.20231	-1.11398	-0.133914	-1.11041	0.0139757	0.0336728	0.00596143	0.0193389	-0.980063	-0.976492	0.506958	0.508214
b0957	ompA	chr	-	1018235	1019276	1.01726	1.00139	0.996599	1.79434	1.7948	1.87583	1.27507	1.26709	1.19997	1.00253	1.8068	1.2597	0.00065343	0.00531671	0.000101501	0.00185266	-0.804266	-0.547098	0.572653	0.684395
b0960	yccS	chr	-	1020952	1023106	-2.35715	-2.17909	-2.22743	-1.2898	-1.34948	-1.3274	-2.53299	-2.312	-2.78347	-2.24106	-1.32475	-2.49877	0.00146594	0.00805457	0.011226	0.029274	-0.916313	-1.17402	0.529861	0.443183
b0961	yccF	chr	-	1023124	1023571	1.12498	1.31471	0.947336	2.33102	2.30711	1.75439	0.58135	1.20162	1.09649	1.10076	2.20893	0.90474	0.0169521	0.0388334	0.0120902	0.0304225	-1.10817	-1.30419	0.463881	0.404947
b1048	mdoG	chr	+	1108557	1110093	0.96307	1.14686	1.21492	1.55625	2.03086	2.01033	1.20981	0.974796	1.0634	1.12002	1.83481	1.10204	0.0234613	0.0488585	0.0229265	0.046828	-0.714798	-0.732774	0.60929	0.601746
b1062	pyrC	chr	-	1120783	1121830	1.21524	1.57675	1.63363	2.90518	2.81444	2.81639	0.888863	0.809038	0.785346	1.49582	2.84925	0.845437	0.00672392	0.0203909	1.29959e-06	0.000228871	-1.35343	-2.00381	0.391361	0.249341
b1086	rluC	chr	+	1144162	1145122	-1.19287	-1.06336	-1.1192	-0.394944	-0.535456	-0.641063	-1.37533	-1.34858	-1.24896	-1.12514	-0.509558	-1.37329	0.00481839	0.0165455	0.00198936	0.0105041	-0.615582	-0.863732	0.652666	0.549529
b1088	yceD	chr	+	1146016	1146538	-4.2364	-4.2587	-4.28801	-3.06619	-2.9988	-3.18679	-4.16728	-4.34076	-4.11491	-4.26283	-3.05452	-4.19748	0.00117617	0.00711915	0.000276728	0.00320008	-1.20831	-1.14296	0.432775	0.452829
b1089	rpmF	chr	+	1146589	1146763	-0.266842	-0.0741314	-0.191231	0.374763	0.47856	0.336591	-0.263715	-0.315404	-0.46611	-0.175301	0.410912	-0.308868	0.00165145	0.00856797	0.000948123	0.00621919	-0.586213	-0.71978	0.666089	0.60719
b1090	plsX	chr	+	1146843	1147914	-4.24443	-4.05899	-4.24016	-3.41467	-3.35105	-3.77047	-4.97289	-4.58667	-4.94877	-4.18911	-3.43744	-4.81846	0.0212754	0.0457129	0.00185799	0.0100969	-0.751664	-1.38102	0.593918	0.383949
b1091	fabH	chr	+	1147981	1148935	0.0492576	-0.0545039	-0.285763	0.42755	0.520896	0.278234	-0.288525	-0.243154	-0.370225	-0.123208	0.43975	-0.286602	0.0174105	0.0394585	0.00289677	0.0125935	-0.562957	-0.726352	0.676913	0.60443
b1094	acpP	chr	+	1150837	1151074	-1.2254	-1.31221	-1.23872	-0.571363	-0.613116	-0.632296	-0.928751	-0.94356	-0.806333	-1.25443	-0.599317	-0.916068	9.91125e-05	0.00234252	0.0123348	0.0306619	-0.655113	-0.316751	0.635026	0.802876
b1095	fabF	chr	+	1151161	1152403	-0.32471	-0.330424	-0.324888	0.125581	0.213442	0.326092	-0.549424	-0.461833	-0.697335	-0.332902	0.202496	-0.542343	0.0109507	0.028707	0.00104362	0.00658571	-0.535398	-0.744838	0.689968	0.596735
b1097	yceG	chr	+	1153334	1154357	-1.18893	-1.64555	-1.34173	-0.725343	-0.185919	-0.609802	-1.41346	-1.86722	-1.89091	-1.41532	-0.476342	-1.62811	0.0151131	0.0358906	0.00578938	0.0190717	-0.93898	-1.15177	0.521602	0.450074
b1109	ndh	chr	+	1165307	1166612	0.780262	1.16899	1.28714	3.39036	3.70006	3.09034	0.280445	-0.0699162	0.06845	1.09846	3.46698	0.0944893	0.00063654	0.00531671	0.000347208	0.00351916	-2.36852	-3.37249	0.193644	0.096556
b1123	potD	chr	-	1181005	1182052	1.29899	1.3887	1.43141	1.883	1.79675	2.00085	0.808784	0.86933	0.470977	1.38399	1.86572	0.775377	0.00314742	0.0128047	0.00396289	0.0154066	-0.481728	-1.09034	0.716119	0.469649
b1125	potB	chr	-	1182839	1183667	-0.904119	-0.565224	-0.735155	0.393114	0.392481	0.571399	-0.884357	-1.43215	-1.42142	-0.727642	0.431147	-1.21741	0.00124458	0.00732483	0.00650497	0.020521	-1.15879	-1.64855	0.447888	0.31896
b1126	potA	chr	-	1183680	1184817	-0.739232	-0.556726	-0.808529	1.17425	1.43623	1.73067	-0.195174	-0.469818	-0.498948	-0.711259	1.38588	-0.363848	0.00158597	0.00840395	0.00154303	0.00876934	-2.09714	-1.74973	0.233721	0.297357
b1131	purB	chr	-	1189838	1191209	0.949037	0.684982	0.840946	2.75968	2.89491	3.05959	0.809609	0.995401	0.908438	0.814066	2.87827	0.892329	6.28104e-05	0.00195517	0.000145788	0.00226124	-2.06421	-1.98594	0.239118	0.252448
b1132	hflD	chr	-	1191212	1191854	-0.32837	-0.514057	-0.818851	0.470552	0.0985676	0.0238594	-0.898578	-0.901893	-1.13983	-0.61716	0.203368	-0.954433	0.0194838	0.0427266	0.00410036	0.0157763	-0.820529	-1.1578	0.566234	0.448195
b1133	mnmA	chr	-	1191889	1192996	-0.536639	-0.248026	-0.0750921	0.588483	0.695111	0.851472	-0.438695	-0.475394	-0.500367	-0.267111	0.687614	-0.45142	0.00640147	0.0198377	0.00279527	0.012355	-0.954726	-1.13903	0.51594	0.454063
b1203	ychF	chr	-	1255943	1257035	0.488742	0.921872	0.835419	1.61242	1.90077	2.14254	0.830869	0.677132	0.354921	0.767831	1.83182	0.684779	0.00526667	0.0172408	0.00377788	0.0149608	-1.06399	-1.14704	0.478307	0.45155
b1207	prs	chr	-	1260150	1261098	0.5693	0.64889	0.605688	1.8599	1.97326	1.59027	0.158072	0.133077	0.212185	0.607009	1.85573	0.15626	0.00699449	0.0209976	0.00355447	0.0142658	-1.24872	-1.69947	0.420821	0.307899
b1210	hemA	chr	+	1262936	1264193	-2.29477	-2.15008	-2.4904	-1.86086	-1.76791	-1.44451	-2.69532	-2.60283	-2.39729	-2.31586	-1.74276	-2.55273	0.0199197	0.0434903	0.00661158	0.0208132	-0.573096	-0.809969	0.672173	0.570394
b1223	narK	chr	+	1277179	1278571	-0.223851	-0.159104	-0.320703	3.05371	2.57358	2.01995	-2.08162	-2.21218	-2.10102	-0.237099	2.5823	-2.10421	0.00992621	0.0267756	0.00353123	0.0142566	-2.8194	-4.68651	0.141669	0.0388346
b1227	narI	chr	+	1285071	1285749	-1.00029	-0.592373	-0.457229	1.09023	1.66872	1.52059	-1.16828	-1.14412	-1.58784	-0.681814	1.41751	-1.26385	0.000912643	0.00606649	0.000324073	0.00337444	-2.09932	-2.68136	0.233368	0.155895
b1241	adhE	chr	-	1294668	1297344	1.32472	1.32629	1.51514	2.40109	2.31994	2.2174	1.97324	2.01287	1.89405	1.39888	2.32295	1.97508	0.000424837	0.0045952	0.00785948	0.0231738	-0.924066	-0.347873	0.527022	0.785741
b1246	oppD	chr	+	1302777	1303791	-0.545888	-0.534711	-0.44929	-0.101685	-0.0286306	0.147853	-0.382977	-0.373082	-0.502154	-0.505578	-0.0193266	-0.390864	0.0108409	0.0286614	0.0136992	0.0330602	-0.486251	-0.371537	0.713878	0.772959
b1277	ribA	chr	-	1336593	1337184	-0.170969	-0.271319	-0.0832666	0.622195	0.727117	0.910665	-0.196591	-0.353944	0.172102	-0.172024	0.715075	-0.241597	0.00154604	0.00828076	0.014787	0.0350784	-0.8871	-0.956672	0.5407	0.515244
b1281	pyrF	chr	+	1339944	1340682	0.662479	0.55847	0.754615	2.56344	2.2354	2.2235	0.40016	0.444779	0.120842	0.659973	2.34528	0.364065	0.000932941	0.00606649	0.000189001	0.0026183	-1.68531	-1.98122	0.310936	0.253276
b1286	rnb	chr	-	1345001	1346936	0.466651	0.50032	0.628718	1.28412	1.41254	1.74863	0.414985	0.493634	0.357945	0.53701	1.42398	0.43742	0.0128087	0.0320003	0.011745	0.0301004	-0.886975	-0.986564	0.540747	0.504678
b1288	fabI	chr	-	1348274	1349063	1.06034	0.998605	0.937271	1.71209	1.59774	1.51456	0.85956	0.83894	0.826491	0.987156	1.62221	0.843136	0.00183708	0.00914851	0.00457737	0.0167246	-0.635051	-0.779072	0.643918	0.582742
b1474	fdnG	chr	+	1545424	1548472	-0.619171	-0.306495	-0.389843	1.52422	1.18316	1.45396	-2.0733	-2.18979	-2.45688	-0.421967	1.344	-2.17732	0.000212378	0.00338454	2.0509e-05	0.000863387	-1.76597	-3.52132	0.29403	0.0870918
b1475	fdnH	chr	+	1548484	1549369	-0.53652	-0.552793	-0.104372	2.39766	1.82544	3.28141	-1.19772	-0.851709	-1.29214	-0.387505	2.22233	-1.09346	0.0131541	0.0323742	0.00844533	0.0240902	-2.60983	-3.31579	0.163819	0.100426
b1605	ydgI	chr	+	1677580	1678963	-2.16691	-2.33117	-2.48366	-1.01668	-0.968291	-1.59622	-2.66355	-2.38579	-3.18369	-2.35185	-1.12137	-2.63663	0.0172193	0.0392042	0.00780448	0.0231031	-1.23048	-1.51526	0.426176	0.349833
b1626	ydgK	chr	+	1703273	1703714	-1.54655	-1.49123	-1.69719	-0.525104	-0.216771	-0.28676	-2.45471	-2.26984	-2.34979	-1.574	-0.327273	-2.36857	0.000803382	0.0058353	0.000227909	0.00297681	-1.24673	-2.0413	0.421403	0.242945
b1627	rsxA	chr	+	1703790	1704372	-2.4324	-2.53909	-2.37383	-1.28943	-1.32791	-0.638103	-2.33726	-2.15333	-2.99612	-2.45498	-1.20464	-2.42033	0.0218511	0.0464617	0.0147946	0.0350784	-1.25034	-1.21569	0.420348	0.430569
b1628	rsxB	chr	+	1704371	1704950	-1.56384	-1.78161	-1.75631	0.188722	-0.00106199	0.11317	-1.90567	-1.94522	-1.49181	-1.71745	0.0760869	-1.91171	4.81808e-05	0.00170812	0.00246502	0.0117642	-1.79354	-1.9878	0.288464	0.252123
b1629	rsxC	chr	+	1704942	1707165	-1.84781	-1.58272	-1.85225	-0.572465	-0.31575	-0.261405	-2.57721	-2.16486	-2.70754	-1.75084	-0.414415	-2.4468	0.000474326	0.00497374	0.00111786	0.0069644	-1.33643	-2.03239	0.396	0.24445
b1631	rsxG	chr	+	1708227	1708848	-1.0846	-0.709821	-0.798969	-0.256634	0.21671	0.24879	-0.941291	-1.15935	-1.79137	-0.852892	0.0320641	-1.19865	0.0123079	0.0310094	0.0154027	0.0358914	-0.884956	-1.23071	0.541504	0.426107
b1637	tyrS	chr	-	1713971	1715246	0.22918	0.114719	0.200215	0.694922	0.908352	0.739328	0.448253	0.39985	0.582967	0.172817	0.78845	0.444448	0.00369292	0.0140052	0.0244318	0.0491954	-0.615633	-0.344002	0.652643	0.787853
b1658	purR	chr	+	1735867	1736893	-0.738813	-0.642442	-0.479619	0.371608	0.575547	0.241441	-0.798752	-0.514329	-0.725099	-0.611573	0.437347	-0.673374	0.00150981	0.00823242	0.00122767	0.00749179	-1.04892	-1.11072	0.48333	0.463063
b1667	ydhR	chr	+	1744723	1745029	-0.278745	-0.206497	-0.581421	0.169959	0.506162	0.71324	-0.468219	-0.0872395	-0.539641	-0.384609	0.402103	-0.352262	0.0167635	0.0386392	0.0178142	0.0396493	-0.786712	-0.754365	0.579664	0.592807
b1676	pykF	chr	+	1753721	1755134	1.88912	1.74818	1.89677	3.6108	3.77225	3.82931	2.00178	1.88732	2.13373	1.84	3.72113	1.97238	3.94478e-05	0.00154573	6.03804e-05	0.00151087	-1.88113	-1.74875	0.271472	0.29756
b1713	pheT	chr	-	1793580	1795968	0.496547	0.568532	0.615977	1.10147	1.20897	1.11996	0.734214	0.826495	0.683308	0.561661	1.15678	0.760589	0.000267151	0.00371764	0.00217085	0.0110784	-0.595116	-0.396188	0.661991	0.759864
b1714	pheS	chr	-	1795982	1796966	0.323802	0.199131	0.051307	1.18605	1.15615	1.07832	0.278845	0.350447	0.422199	0.171861	1.1592	0.331916	0.00267757	0.0117262	0.000166035	0.00249723	-0.987343	-0.827287	0.504406	0.563588
b1717	rpmI	chr	-	1797825	1798023	0.758521	0.701627	0.741971	1.35677	1.27303	1.1675	0.624307	0.672312	0.761661	0.731552	1.28155	0.665064	0.00638874	0.0198377	0.00150045	0.00859298	-0.550003	-0.616491	0.683019	0.652256
b1718	infC	chr	-	1798119	1798662	-3.32277	-3.35925	-3.26509	-2.42728	-2.3932	-2.3952	-3.04727	-3.15302	-3.13381	-3.30866	-2.39972	-3.09961	0.000192543	0.00326089	0.00082551	0.0057101	-0.908946	-0.699893	0.532574	0.615618
b1719	thrS	chr	-	1798665	1800594	-0.120004	-0.17449	-0.111027	0.460863	0.333793	0.506761	-0.0218429	-0.105001	0.0330208	-0.132181	0.410348	-0.0506296	0.003704	0.0140052	0.00259438	0.0118863	-0.542528	-0.460977	0.686567	0.726494
b1722	ydiY	chr	-	1803348	1804107	-1.62409	-1.86377	-1.55745	0.206915	0.0405407	-0.180561	-1.41757	-1.47391	-1.47033	-1.68021	0.061965	-1.46919	0.000369374	0.00426355	0.00481143	0.017046	-1.74218	-1.53116	0.298918	0.346
b1749	xthA	chr	+	1830451	1831258	0.781487	0.713665	0.841361	1.72235	1.58973	1.71779	1.074	0.757957	0.861468	0.773155	1.65826	0.929885	0.000113137	0.00251435	0.00578287	0.0190717	-0.885104	-0.728374	0.541448	0.603584
b1767	ansA	chr	+	1848883	1849900	0.484375	0.866028	0.640922	1.45319	1.87411	1.90805	0.976707	0.734899	0.733608	0.671811	1.71265	0.83042	0.00516739	0.0171507	0.0103381	0.0276861	-1.04083	-0.882226	0.486046	0.54253
b1782	mipA	chr	-	1863749	1864496	1.38692	1.54463	1.41765	1.76248	2.03477	1.81732	1.15393	1.20435	1.30201	1.44695	1.89167	1.19895	0.0190287	0.0421007	0.00601365	0.0193898	-0.444729	-0.692728	0.734723	0.618683
b1786	yeaJ	chr	+	1870064	1871555	-1.89856	-2.17917	-1.96077	-0.988623	-1.18896	-1.14454	-2.31874	-2.47129	-2.40435	-2.03729	-1.1197	-2.4187	0.00151534	0.00823242	0.000125719	0.00210332	-0.917587	-1.29899	0.529394	0.40641
b1807	yeaZ	chr	-	1888595	1889291	-0.866878	-0.84419	-1.02026	0.270246	-0.0841043	0.0722053	-1.30033	-1.15782	-1.21668	-0.917185	0.0775939	-1.21427	0.00306123	0.0125872	0.00233361	0.0114148	-0.994779	-1.29187	0.501813	0.408422
b1825	yebO	chr	-	1906284	1906572	-4.46779	-4.48992	-4.35533	-3.69549	-3.67485	-3.69824	-4.94865	-4.78882	-4.67468	-4.43565	-3.67772	-4.92681	0.00241448	0.0108944	0.00474997	0.0169609	-0.757935	-1.2491	0.591342	0.420711
b1830	prc	chr	-	1910791	1912840	-1.7864	-1.78161	-1.57978	-1.41309	-1.45279	-1.2187	-1.7047	-1.74444	-1.84767	-1.71224	-1.40026	-1.73846	0.0235643	0.0490045	0.0142928	0.0341058	-0.311983	-0.338196	0.805534	0.79103
b1831	proQ	chr	-	1912859	1913558	-0.663697	-0.469118	-0.467641	0.361492	0.154277	0.31576	-0.313453	-0.35042	-0.394434	-0.525083	0.261271	-0.339215	0.00086402	0.00594287	0.00485365	0.017046	-0.786355	-0.600486	0.579807	0.659532
b1864	yebC	chr	-	1945434	1946175	0.975282	0.903574	0.791642	1.81015	1.67381	1.65184	0.964942	1.10185	0.780598	0.873307	1.721	0.986078	0.000363175	0.00423267	0.00516101	0.0176661	-0.847689	-0.734919	0.555674	0.600852
b1866	aspS	chr	-	1946773	1948546	1.29605	1.22655	1.25791	1.96076	1.94141	2.00742	0.951331	1.04756	0.712817	1.25475	1.96642	0.941925	1.46013e-05	0.000905892	0.00687342	0.0210005	-0.711661	-1.02449	0.610617	0.491584
b1870	cmoA	chr	+	1950725	1951469	0.124983	0.526511	0.43336	1.54461	1.70336	1.13494	0.282873	0.0644947	-0.114031	0.367621	1.52738	0.165055	0.00809435	0.0232225	0.00391711	0.0153315	-1.15976	-1.36233	0.447586	0.388954
b1876	argS	chr	+	1958085	1959819	0.219936	0.250131	0.241187	1.35462	1.3143	1.03196	0.302223	0.224104	0.421317	0.230313	1.2689	0.302649	0.00978228	0.0264833	0.0035426	0.0142566	-1.03858	-0.966249	0.486805	0.511835
b1905	ftnA	chr	+	1986739	1987237	1.89749	1.62941	1.97507	2.881	2.91583	3.21109	2.39839	1.93017	2.402	1.81975	2.94945	2.19929	0.00139417	0.00775454	0.0206062	0.0435214	-1.1297	-0.750154	0.457011	0.59454
b1967	hchA	chr	+	2033858	2034710	0.79816	0.768586	0.362995	1.60168	1.72042	1.90013	1.00465	0.94555	0.742243	0.606275	1.71356	0.932873	0.00494658	0.0167778	0.00206496	0.0107133	-1.10729	-0.780691	0.464165	0.582088
b2000	flu	chr	+	2069562	2072682	1.48749	1.24906	1.56418	5.34547	5.79483	5.49157	2.8313	2.98801	2.60758	1.42241	5.56286	2.85217	3.30192e-05	0.00144605	0.000113945	0.00199605	-4.14045	-2.71068	0.0567023	0.152758
b2014	yeeF	chr	-	2083727	2085086	-0.0914703	-0.14302	-0.112344	1.44167	1.55281	1.41137	-1.1726	-1.10052	-1.43592	-0.12073	1.49155	-1.20066	0.000213665	0.00338454	0.000308394	0.00330358	-1.61228	-2.69221	0.327081	0.154726
b2029	gnd	chr	-	2097885	2099292	1.44901	1.37736	1.38669	1.77206	1.79719	1.73412	1.30375	1.33652	1.23901	1.39923	1.77708	1.30119	0.000294419	0.00394941	0.000401314	0.00388024	-0.377849	-0.475893	0.769584	0.719022
b2040	rfbD	chr	-	2109100	2110000	1.228	1.08119	1.37939	2.34475	2.08088	2.0321	1.13203	1.30063	1.51942	1.22721	2.15742	1.24013	0.00217885	0.0102393	0.00519971	0.017705	-0.930207	-0.917285	0.524783	0.529505
b2042	galF	chr	-	2111457	2112351	-1.0301	-1.07744	-1.13935	-0.322613	-0.155531	-0.155109	-0.70373	-0.702776	-0.775437	-1.08665	-0.214628	-0.723095	0.000649993	0.00531671	0.00491381	0.0170552	-0.872021	-0.508467	0.546381	0.702969
b2066	udk	chr	-	2140330	2140972	0.0745266	0.211009	0.536849	2.93476	2.40794	2.97516	0.499589	0.762286	0.715783	0.295673	2.68578	0.650848	0.000588297	0.00524536	0.00260314	0.0118898	-2.39011	-2.03494	0.190768	0.244019
b2081	yegQ	chr	+	2163691	2165053	0.245054	0.564595	0.265127	1.64181	1.6328	1.78466	0.0446167	-0.417823	-0.301423	0.356843	1.66453	-0.203398	0.0017073	0.00880605	0.00236452	0.0114683	-1.30768	-1.86793	0.403969	0.273967
b2113	mrp	chr	-	2191080	2192190	0.30866	0.126341	0.378799	1.34402	1.21003	1.21617	0.375579	0.412508	0.311197	0.271606	1.26202	0.390733	0.00107215	0.0066242	0.000171725	0.00250309	-0.990415	-0.871288	0.503333	0.546658
b2114	metG	chr	+	2192321	2194355	1.1071	1.33419	0.869097	1.89171	1.67046	1.66034	0.925158	1.19507	0.960086	1.08427	1.74616	1.02622	0.0233067	0.0486728	0.00340811	0.0139798	-0.661888	-0.719942	0.63205	0.607122
b2183	rsuA	chr	-	2277809	2278505	-0.561154	-0.453485	-0.495144	0.366677	0.579645	0.668796	-0.334024	-0.246345	-0.212802	-0.489413	0.515292	-0.301358	0.00364149	0.0140052	0.00584481	0.0191164	-1.00471	-0.816651	0.498372	0.567759
b2185	rplY	chr	+	2280538	2280823	0.255483	0.111088	0.251597	1.18383	1.2089	1.29641	0.206846	0.2174	0.114616	0.20294	1.21598	0.192314	0.000122525	0.00256958	2.46054e-05	0.000962096	-1.01304	-1.02367	0.495501	0.491865
b2187	yejL	chr	+	2282150	2282378	-0.48447	-0.552987	-0.391389	0.742309	0.722871	0.991485	-0.309507	-0.565448	-0.243885	-0.465878	0.781951	-0.39904	0.00082717	0.00589309	0.000864597	0.00593265	-1.24783	-1.18099	0.421081	0.441048
b2235	nrdB	chr	+	2345405	2346536	0.289847	0.481013	0.366386	1.03849	1.03946	1.17146	0.450145	0.397172	0.290688	0.386444	1.06106	0.402369	0.000739491	0.00564668	0.000406044	0.00390065	-0.674615	-0.658691	0.626499	0.633453
b2264	menD	chr	-	2375610	2377281	-1.25306	-1.22951	-1.22083	-0.484284	-0.623761	-0.250781	-2.53614	-2.07786	-2.83332	-1.2445	-0.505352	-2.43774	0.0181994	0.0405298	0.00405539	0.0156437	-0.739152	-1.93238	0.599091	0.261996
b2276	nuoN	chr	-	2388069	2389527	-0.718215	-0.58491	-0.571748	-0.235003	-0.11758	-0.170694	-0.701568	-0.621175	-0.818691	-0.621612	-0.169831	-0.690658	0.00211314	0.0100206	0.00292711	0.0126333	-0.451781	-0.520827	0.73114	0.696972
b2277	nuoM	chr	-	2389533	2391063	0.470282	0.373084	0.428411	1.06073	1.18572	1.09545	0.829255	0.923662	0.870971	0.416686	1.12567	0.870463	0.000192719	0.00326089	0.00833087	0.0238093	-0.708989	-0.255212	0.611749	0.837864
b2296	ackA	chr	+	2411491	2412694	1.47307	1.36894	1.52986	2.14809	2.35743	2.09547	0.315314	0.311539	0.0856836	1.45583	2.22667	0.270663	0.00306861	0.0125872	5.97536e-05	0.00151087	-0.770837	-1.956	0.586077	0.257741
b2312	purF	chr	-	2426742	2428260	-0.341115	-0.0617194	-0.193349	1.20705	1.31609	1.2687	-0.0950016	-0.00599388	-0.231541	-0.186464	1.25762	-0.0853221	0.000998983	0.0063029	0.00041488	0.00395576	-1.44408	-1.34294	0.367526	0.394216
b2313	cvpA	chr	-	2428296	2428785	-2.22992	-1.61128	-1.9011	-0.0517869	-0.734284	-0.801333	-2.02766	-1.9128	-2.18023	-1.90039	-0.520998	-1.99293	0.0117431	0.0299408	0.0167164	0.0379431	-1.37939	-1.47193	0.384382	0.3605
b2346	vacJ	chr	-	2462273	2463029	-0.588801	-0.534042	-0.459067	-0.183943	-0.0887263	-0.219688	-0.543097	-0.425584	-0.35697	-0.521511	-0.141167	-0.468468	0.00260083	0.0114575	0.0173875	0.0390498	-0.380345	-0.327301	0.768254	0.797026
b2350	yfdG	chr	+	2465876	2466239	-2.83005	-3.02291	-2.78936	-2.18915	-2.16041	-2.05209	-3.27781	-2.87122	-3.119	-2.90467	-2.14729	-3.1132	0.00223568	0.0104683	0.00873426	0.0247578	-0.75738	-0.965907	0.59157	0.511956
b2393	nupC	chr	+	2511063	2512266	1.31462	1.39968	1.45368	1.91048	1.83122	1.78653	0.820699	0.883013	0.750532	1.4011	1.84696	0.822897	0.00118723	0.007157	4.21979e-05	0.0012823	-0.445853	-1.02406	0.73415	0.491731
b2400	gltX	chr	-	2517278	2518694	0.62982	0.580511	0.578381	1.27383	1.33483	1.22438	0.451125	0.477494	0.222204	0.593497	1.29388	0.42223	0.000306401	0.00401442	0.00353803	0.0142566	-0.700379	-0.871646	0.615411	0.546523
b2413	cysZ	chr	+	2529484	2530246	0.126569	-0.44647	-0.263784	0.543304	0.803702	0.925982	-0.982862	-1.08015	-0.654462	-0.222534	0.716152	-1.013	0.0130298	0.0322326	0.000683225	0.00506721	-0.938686	-1.72915	0.521708	0.301629
b2476	purC	chr	-	2594926	2595640	1.05274	1.03987	1.02183	3.27456	3.11023	3.04714	1.6594	1.4944	1.51538	1.03088	3.16249	1.58771	0.000867499	0.00594287	7.93568e-05	0.00162866	-2.13161	-1.57478	0.228203	0.335694
b2498	upp	chr	-	2618267	2618894	1.40098	1.33379	1.33243	2.08363	1.89929	2.02575	0.455339	0.644528	0.0738103	1.34987	1.98881	0.449069	0.00268593	0.0117283	0.00626256	0.0200126	-0.638933	-1.53974	0.642188	0.343948
b2499	purM	chr	+	2619218	2620256	0.363169	0.766272	0.274124	3.16035	2.24784	2.46504	1.03075	0.735999	1.08049	0.449082	2.5771	0.925121	0.00563658	0.0181274	0.0158764	0.0365943	-2.12802	-1.65198	0.228772	0.318204
b2507	guaA	chr	-	2628979	2630557	1.53729	1.61345	1.52956	2.95576	3.01122	3.19963	0.537629	0.565936	0.490408	1.55846	3.02798	0.539442	0.000869651	0.00594287	0.000347426	0.00351916	-1.46952	-2.48854	0.361102	0.178186
b2508	guaB	chr	-	2630625	2632092	1.78612	1.88231	1.94683	4.24792	4.09066	4.20922	1.59516	1.68869	1.66089	1.87692	4.17163	1.63995	4.09172e-06	0.000611074	1.14696e-05	0.00062948	-2.29471	-2.53168	0.203809	0.172938
b2513	yfgM	chr	-	2636684	2637305	0.159157	0.139883	0.0669817	0.328485	0.463743	0.431382	-0.00146237	0.211559	-0.00337361	0.120341	0.406178	0.0543401	0.00640565	0.0198377	0.023042	0.0468709	-0.285837	-0.351838	0.820266	0.783585
b2522	sseB	chr	-	2652178	2652955	0.599024	0.286265	0.360605	0.777018	1.21819	1.05593	0.126937	0.578342	0.239992	0.400401	1.02213	0.296362	0.0229708	0.0482418	0.0199935	0.042766	-0.621729	-0.725768	0.649892	0.604675
b2527	hscB	chr	-	2656973	2657489	-0.0128066	-0.682076	0.00682446	1.14334	1.02533	1.53389	-0.253591	0.101073	-0.621447	-0.245496	1.15351	-0.191859	0.00839511	0.0238101	0.0058129	0.0191069	-1.39901	-1.34537	0.37919	0.393553
b2528	iscA	chr	-	2657584	2657908	0.423449	0.270972	0.551679	1.30293	1.00142	0.931619	0.0605178	0.214857	0.102139	0.420634	1.09958	0.099903	0.0115404	0.0296783	0.00693564	0.0210657	-0.678945	-0.999676	0.624622	0.500112
b2532	trmJ	chr	-	2660604	2661345	-1.65943	-1.45217	-1.67883	-1.01307	-1.06827	-1.02418	-1.77936	-1.7298	-2.04081	-1.59132	-1.04112	-1.81098	0.0127711	0.0319599	0.0118202	0.0301374	-0.550197	-0.769858	0.682927	0.586475
b2533	suhB	chr	+	2661463	2662267	0.362759	0.0865221	0.26119	2.24609	2.11455	2.17646	-1.01097	-1.06218	-1.3325	0.221415	2.17813	-1.07723	0.000297067	0.00394941	0.000223028	0.00293884	-1.95671	-3.25536	0.257615	0.104723
b2557	purL	chr	-	2689677	2693565	0.0490954	0.186898	-0.124394	1.4833	1.57087	1.88023	0.253599	0.0193575	-0.178854	0.0166419	1.59377	0.0854579	0.000643791	0.00531671	0.000749657	0.00534449	-1.57713	-1.50832	0.335148	0.351521
b2559	tadA	chr	-	2695375	2695879	-3.14541	-2.86608	-3.53874	-1.79826	-1.87561	-0.993978	-3.45522	-3.61004	-4.30233	-3.2171	-1.70453	-3.62955	0.0119274	0.0303071	0.00442601	0.0164347	-1.51257	-1.92502	0.350485	0.263337
b2566	era	chr	-	2700502	2701408	-0.159462	0.370392	-0.12941	0.808626	0.777871	1.12225	-0.363657	-0.823825	-0.0928615	0.0287494	0.851306	-0.52204	0.017936	0.0403034	0.0116656	0.0300001	-0.822556	-1.37335	0.565439	0.385995
b2567	rnc	chr	-	2701404	2702085	0.105391	-0.0844938	0.160055	1.15814	1.18156	1.02074	0.0589386	-0.00595386	-0.349433	0.0534822	1.14781	-0.0245693	0.00058795	0.00524536	0.00498355	0.0172288	-1.09433	-1.17238	0.468353	0.443688
b2576	srmB	chr	+	2710917	2712252	0.160553	-0.020466	0.187727	1.19999	1.05687	1.07429	-0.139031	-0.0383299	0.125744	0.108042	1.11713	-0.0859991	0.000446728	0.00475127	0.000747895	0.00534449	-1.00909	-1.20313	0.496861	0.434333
b2579	yfiD	chr	-	2714087	2714471	1.93737	1.83078	2.07495	3.90565	3.89843	3.3513	-0.156099	-0.395566	-0.24513	1.95889	3.76464	-0.254537	0.00512997	0.0171477	0.000664924	0.00506721	-1.80575	-4.01917	0.286032	0.0616749
b2606	rplS	chr	-	2742204	2742552	0.639559	0.697042	0.639609	1.26781	1.34424	1.23119	0.594552	0.583203	0.742243	0.657002	1.29665	0.610262	0.000357101	0.00423267	0.000996046	0.00643071	-0.639646	-0.686386	0.64187	0.621409
b2607	trmD	chr	-	2742593	2743361	-3.97242	-3.95611	-3.91051	-3.72659	-3.70429	-3.71757	-5.09554	-5.11429	-5.18525	-3.94389	-3.71233	-5.10923	0.00309469	0.0126246	0.000190626	0.0026183	-0.23156	-1.39691	0.851713	0.379743
b2608	rimM	chr	-	2743391	2743940	-4.10353	-3.92983	-3.93454	-3.32988	-3.28371	-3.13658	-4.60063	-4.47323	-4.25501	-3.99102	-3.27524	-4.48969	0.000824763	0.00589309	0.00149425	0.00859048	-0.715781	-1.21446	0.608875	0.430935
b2609	rpsP	chr	-	2743958	2744207	0.188469	0.240128	0.20323	0.784051	0.680337	0.679931	-0.407354	-0.344416	-0.192524	0.216203	0.717412	-0.367086	0.0013922	0.00775454	0.000652882	0.00506324	-0.501209	-1.0845	0.706514	0.471556
b2610	ffh	chr	-	2744455	2745817	-0.207037	-0.349861	-0.286027	0.587705	0.520557	0.629848	-0.305598	-0.498071	-0.837438	-0.289176	0.565576	-0.462671	0.000121209	0.00256958	0.0154743	0.0359458	-0.854752	-1.02825	0.55296	0.490306
b2620	smpB	chr	+	2752917	2753400	0.135537	0.248783	-0.159054	1.18072	1.8427	1.40075	-0.0206136	0.326166	0.282184	0.0702816	1.49939	0.157089	0.00636124	0.0198377	0.00927577	0.0256245	-1.42911	-1.3423	0.371361	0.394391
b2669	stpA	chr	-	2796112	2796517	-0.0789726	-0.158484	-0.194194	0.874913	1.05464	1.53242	-0.378232	-0.544549	-0.358546	-0.135589	1.06457	-0.421812	0.0195861	0.0428312	0.0100374	0.0270267	-1.20016	-1.48639	0.435226	0.356905
b2684	mprA	chr	+	2808791	2809322	0.58772	0.397701	0.340326	1.80364	1.74565	1.91545	1.1979	1.03712	1.08699	0.429222	1.80083	1.11252	0.000252473	0.00369356	0.000493273	0.00447856	-1.37161	-0.688316	0.386459	0.620578
b2779	eno	chr	-	2904664	2905963	2.10773	1.9917	2.00405	2.69209	2.67743	2.66762	1.62156	1.51407	1.70326	2.02895	2.67909	1.59037	0.00243133	0.0109281	0.00229072	0.0113879	-0.650144	-1.08872	0.637217	0.470177
b2780	pyrG	chr	-	2906050	2907688	0.549566	0.359898	0.448173	1.61124	1.43351	1.62063	0.0372919	-0.0782626	-0.131688	0.445491	1.53182	-0.0320618	0.000188274	0.00325977	4.48045e-05	0.00132476	-1.08633	-1.56388	0.470959	0.33824
b2812	ygdL	chr	-	2943057	2943864	-1.58654	-1.13539	-1.57142	-0.675713	-0.554203	-0.738598	-1.90849	-1.90851	-2.10776	-1.43408	-0.628233	-1.93195	0.0237993	0.0492867	0.000135218	0.00219024	-0.805851	-1.30372	0.572024	0.40508
b2828	lgt	chr	-	2963183	2964059	0.0463466	-0.396206	-0.0317573	0.854744	0.918208	0.75192	0.309071	-0.0221444	0.327856	-0.148129	0.859497	0.22191	0.0118112	0.030063	0.0182171	0.040425	-1.00763	-0.637587	0.497364	0.642787
b2890	lysS	chr	-	3031678	3033196	0.662949	0.443289	0.731622	1.72154	1.45089	1.77377	0.38663	0.569621	0.886491	0.612309	1.60817	0.522869	0.00156525	0.00832378	0.0062045	0.0199536	-0.995862	-1.0853	0.501436	0.471293
b2924	mscS	chr	-	3066968	3067829	-0.452922	-0.776511	-0.456161	0.543849	0.513043	0.293009	-0.925537	-0.973235	-1.27562	-0.577767	0.486885	-0.987242	0.00225195	0.0105114	0.000606832	0.00480624	-1.06465	-1.47413	0.478088	0.359951
b2925	fbaA	chr	-	3068186	3069266	1.71117	1.632	1.73824	2.1179	1.98332	2.06137	1.73452	1.81354	1.69669	1.69437	2.04792	1.75272	0.00234058	0.0107234	0.00438559	0.0163403	-0.353553	-0.295205	0.782654	0.814957
b2937	speB	chr	-	3080898	3081819	1.61148	1.1507	1.55481	2.36812	2.41209	2.34089	1.0519	1.12741	1.11201	1.41433	2.38347	1.07905	0.0214507	0.0460231	2.32913e-06	0.000299317	-0.969141	-1.30442	0.51081	0.404883
b2942	metK	chr	+	3084727	3085882	0.981412	0.890451	0.664322	1.88031	2.04544	2.18747	0.562552	0.663682	0.396088	0.818988	2.00569	0.574024	0.000785729	0.0058009	0.000246102	0.00306532	-1.1867	-1.43166	0.439307	0.370704
b2960	trmI	chr	-	3100154	3100874	-0.362393	-0.198916	-0.646349	1.09992	0.872727	0.835674	0.305289	0.171265	0.0931505	-0.432218	0.94847	0.227485	0.00202367	0.00975158	0.00258519	0.0118863	-1.38069	-0.720985	0.384036	0.606683
b3041	ribB	chr	-	3181834	3182488	0.647318	1.07139	0.818817	1.21759	1.57665	1.60599	0.642853	0.516303	0.378127	0.853067	1.4356	0.552125	0.0240155	0.0495966	0.00536328	0.0179863	-0.582534	-0.883476	0.66779	0.54206
b3057	bacA	chr	-	3201331	3202153	-0.315617	-0.0191108	-0.0243387	0.684413	0.330282	0.859998	-0.116235	-0.52132	-0.283804	-0.110209	0.545659	-0.282851	0.021787	0.0464617	0.0105186	0.0280181	-0.655868	-0.82851	0.634693	0.563111
b3065	rpsU	chr	+	3208802	3209018	-0.0549035	-0.0269091	-0.0207319	0.128631	0.203798	0.17072	-1.12758	-1.04532	-1.23828	-0.0332412	0.174145	-1.13138	0.00414645	0.015057	0.000526245	0.0045769	-0.207386	-1.30553	0.866105	0.404573
b3066	dnaG	chr	+	3209128	3210874	-2.47663	-2.6165	-2.30664	-1.73771	-1.84378	-1.80133	-3.32425	-3.1453	-3.34103	-2.46905	-1.7961	-3.26765	0.0106481	0.028414	0.000278051	0.00320008	-0.672946	-1.47155	0.627225	0.360595
b3067	rpoD	chr	+	3211068	3212910	0.850776	0.763603	0.776533	1.96945	1.98624	1.47631	0.309613	0.372592	0.584127	0.786498	1.87168	0.367205	0.0237238	0.0492674	0.00545877	0.0181837	-1.08518	-1.50448	0.471332	0.352458
b3084	rlmG	chr	-	3232760	3233897	-0.526552	-0.319225	-0.903951	0.348966	0.805569	0.375054	-0.707217	-0.827525	-1.14786	-0.639572	0.55168	-0.815767	0.00890603	0.0250682	0.00220006	0.0111047	-1.19125	-1.36745	0.437923	0.387577
b3162	deaD	chr	-	3303992	3305882	0.0357939	-0.0476073	0.186654	1.61317	1.83068	1.7628	-0.9409	-0.871855	-0.927911	0.0649572	1.73776	-0.904731	5.96422e-05	0.00195517	0.000183323	0.00257517	-1.67281	-2.64249	0.313643	0.160151
b3165	rpsO	chr	-	3309436	3309706	-0.744389	-0.738124	-0.732544	0.187259	0.135513	0.0870312	-0.812257	-0.863309	-0.921314	-0.736826	0.14487	-0.849511	0.00095001	0.00609726	2.08744e-05	0.000863387	-0.881696	-0.994381	0.542729	0.501951
b3170	yhbC	chr	-	3315575	3316034	-0.190472	-0.372823	-0.383132	0.54874	0.965251	0.566765	-0.377125	-0.437196	-0.506377	-0.339778	0.725132	-0.437428	0.00815488	0.0233064	0.00988872	0.0269412	-1.06491	-1.16256	0.478003	0.446719
b3175	secG	chr	-	3320194	3320527	-3.27478	-3.21939	-3.29536	-2.81744	-2.86418	-2.64815	-3.54917	-3.74055	-3.46994	-3.26297	-2.81007	-3.60075	0.0109115	0.0286614	0.00170116	0.00952263	-0.452893	-0.790676	0.730576	0.578073
b3183	obgE	chr	-	3328603	3329776	-0.443058	-0.264308	-0.0929078	0.397008	0.359364	0.441714	-0.617723	-0.771572	-0.761133	-0.248696	0.392368	-0.70245	0.0179439	0.0403034	0.000342783	0.00351916	-0.641064	-1.09482	0.64124	0.468195
b3186	rplU	chr	-	3331161	3331473	-0.447984	-0.533446	-0.484263	0.0623597	0.134559	-0.0398781	-0.88481	-0.790395	-0.588754	-0.489277	0.0792403	-0.806502	0.0027323	0.0117598	0.00318911	0.0133013	-0.568517	-0.885742	0.674309	0.541209
b3187	ispB	chr	+	3331731	3332703	-1.06912	-0.978142	-1.29659	-0.347645	-0.319047	-0.315045	-1.0947	-1.07414	-0.867321	-1.13886	-0.323766	-1.03933	0.0133632	0.0326801	0.00993068	0.0269412	-0.815097	-0.715568	0.56837	0.608965
b3228	sspB	chr	-	3374300	3374798	-2.09324	-2.18826	-1.85739	-1.2911	-1.13159	-1.59188	-2.34105	-2.43223	-2.56189	-2.04452	-1.28165	-2.43338	0.016018	0.0373092	0.00598843	0.0193843	-0.762876	-1.15174	0.589321	0.450083
b3229	sspA	chr	-	3374803	3375442	0.168545	0.421999	0.0030089	0.960104	0.825191	0.651968	0.264951	0.0150636	-0.0253084	0.188043	0.84035	0.128775	0.0181294	0.0404718	0.00463545	0.0167953	-0.652307	-0.711575	0.636262	0.610653
b3230	rpsI	chr	-	3375836	3376229	-0.498982	-0.534115	-0.413204	0.860494	0.984646	0.827861	-0.318977	-0.320216	-0.284287	-0.475072	0.9167	-0.306701	3.85505e-05	0.00154573	0.000915353	0.00610353	-1.39177	-1.2234	0.381096	0.428272
b3231	rplM	chr	-	3376244	3376673	0.804844	0.767734	0.84326	1.51787	1.44168	1.58959	0.187613	0.0963804	0.272366	0.808587	1.49322	0.166272	0.00069418	0.00546564	4.56042e-05	0.00132476	-0.68463	-1.32694	0.622165	0.398611
b3250	mreC	chr	-	3396896	3398000	-1.97979	-2.0643	-2.04794	-1.46793	-1.47573	-1.62048	-2.32905	-1.97509	-2.41615	-2.0383	-1.5028	-2.24742	0.00274993	0.0117598	0.0227909	0.0467433	-0.535501	-0.744628	0.689919	0.596822
b3255	accB	chr	+	3403457	3403928	1.34694	1.32139	1.37484	1.87774	2.01316	1.93148	0.893868	0.782983	0.807396	1.34711	1.94399	0.848724	0.00160234	0.00846056	3.35472e-05	0.00113527	-0.596876	-1.09526	0.661184	0.468051
[truncated: 74 more rows]

## Sheet: (WT, C) > M
# Note: These are taken only from the case where both comparisons are significant						Replicates Separate									Replicates Combined									Fold Change
[truncated: 238 more rows]
